# Supplementary material for: Survival-associated alternative splicing signatures in non-small cell lung cancer
Source: publisher site journal article supplement (doi:10.18632/aging.102983), 2020-04-13
Supplement: Supplementary file [file aging-v12i7-102983-supplementary-material-SD1.pdf]

## SUPPLEMENTARY FIGURES

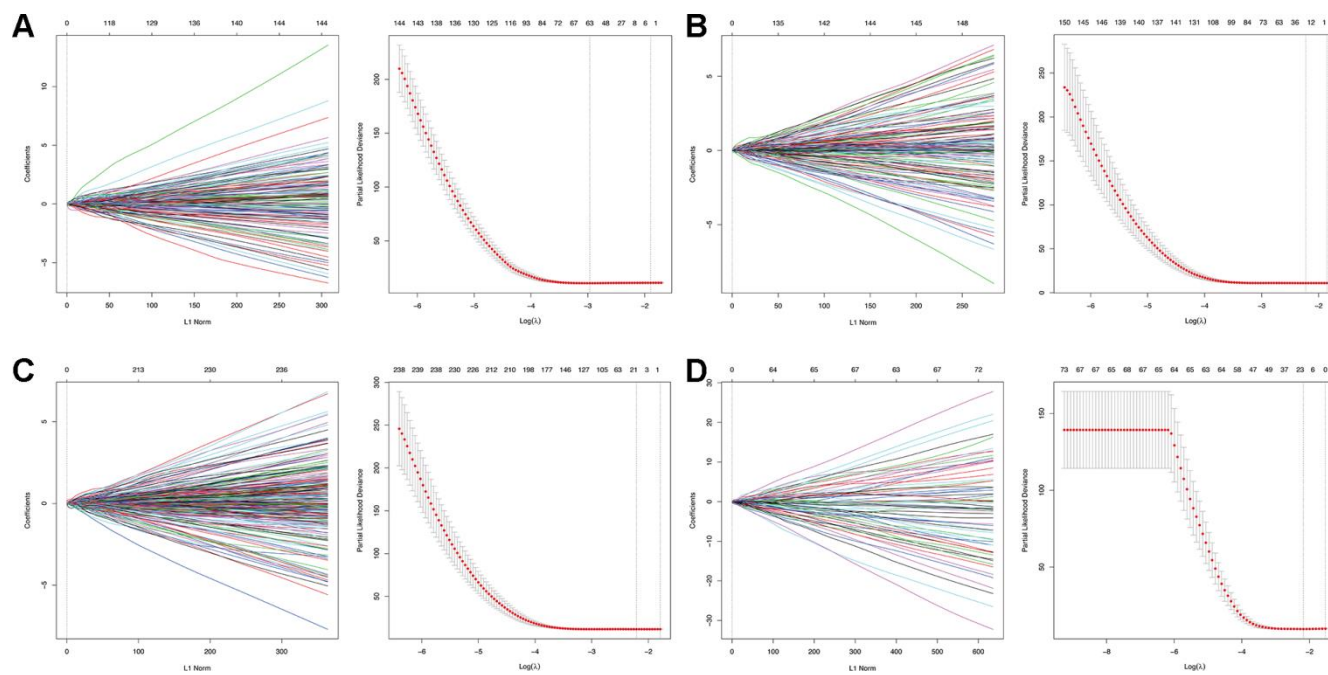

**Supplementary Figure 1. LASSO analysis for OS-related DEAS events.** (A) LUAD\_MALE group, (B) LUAD\_FEMALE group, (C) LUSC\_MALE group, (D) LUSC\_FEMALE group. In left plot, each curve showed an OS-related DEAS event; ten-fold cross-validation was used to calculate best lambda which leads to minimum mean cross-validated error. The right plot was the partial likelihood deviance of the LASSO coefficient profiles.

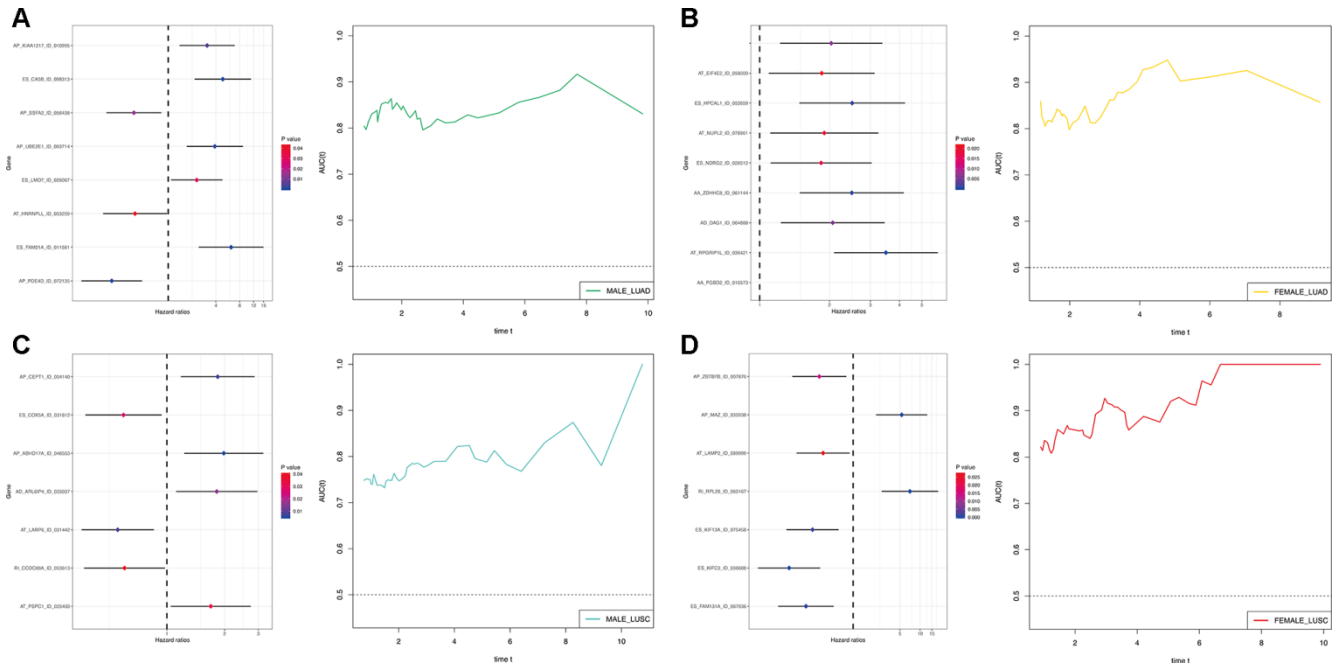

**Supplementary Figure 2. The prognostic analysis of the final models in four cohorts. (A) LUAD\_MALE group, (B) LUAD\_FEMALE group, (C) LUSC\_MALE group, (D) LUSC\_FEMALE group.** The left plot is the forest plot of prognostic models. p-values are indicated by the color scale on the side. The right plot is the curve of time-dependent AUCs versus time: AUC(t) versus t.
