# Supplementary material for: Survival-associated alternative splicing signatures in non-small cell lung cancer
Source: Aging (Albany NY). 2020 Apr 13;12(7):5878–93. doi: 10.18632/aging.102983 (PMC7185095; doi:10.18632/aging.102983)
Supplement: Supplementary Table 1. PSI_LUAD_1 [file aging-12-102983-s009..xlsx]

## Sheet: Table S1_PSI_LUAD
symbol	as_id	splice_type	exons	from_exon	to_exon	novel_splice	pct_with_values	psi_range	std_psi	TCGA_05_4244	TCGA_05_4249	TCGA_05_4250	TCGA_05_4382	TCGA_05_4384	TCGA_05_4389	TCGA_05_4390	TCGA_05_4395	TCGA_05_4396	TCGA_05_4397	TCGA_05_4398	TCGA_05_4402	TCGA_05_4403	TCGA_05_4405	TCGA_05_4410	TCGA_05_4415	TCGA_05_4417	TCGA_05_4418	TCGA_05_4420	TCGA_05_4422	TCGA_05_4424	TCGA_05_4425	TCGA_05_4426	TCGA_05_4427	TCGA_05_4430	TCGA_05_4432	TCGA_05_4433	TCGA_05_4434	TCGA_05_5420	TCGA_05_5423	TCGA_05_5425	TCGA_05_5428	TCGA_05_5429	TCGA_05_5715	TCGA_35_3615	TCGA_35_4122	TCGA_35_4123	TCGA_35_5375	TCGA_38_4625	TCGA_38_4625_Norm
PLEKHN1	1	ES	11	10	12	0	0.8045	0.6755	0.0713	0.9267	1	1	0.8582	1	0.8737	1	1	1		0.9642	1	1	0.9226	1	1	1	0.8953	0.8795	0.9501		1	0.9528	1	0.9673	0.9064	1	0.9573	1	0.5355	1	1	0.9125	0.9022	1	0.9444	0.9662		0.8463
HES4	4	AD	1.2:1.3	1.1	2	0	0.9738	0.6938	0.084	1	0.8222	0.8736	0.9068	1	0.782	0.9255	0.8853	0.9409	0.9642	0.9359	0.9694	0.9498	0.9012	1	0.946	0.906	0.9323	0.9295	0.9233		0.9426	0.9401	1	0.9115	0.96		0.9509	1	0.9358	0.8397	0.9508	0.9247	0.8376	0.933	0.8995	0.9295	1	0.8992	0.6901
HES4	5	ES	1.3	1.1	2	0	0.9825	0.6379	0.0632	1	0.9491	0.946	0.8739	1	0.7233	0.9046	0.9258	0.9672	0.973	0.8905	0.9648	0.9819	0.9489	1	0.9651	0.9787	0.972	0.9485	0.9423	1	0.9736	0.9254	1	0.9124	0.9452	0.8679	0.9559	1	0.9499	0.9591	0.9769	0.9523	0.9734	0.9755	0.9691	0.9773	1	0.893	0.8591
HES4	6	RI	1.2	1.1	1.3	0	0.9738	0.8923	0.1558	0.583	0.2202	0.3021	0.6225	0.3203	0.6014	0.6063	0.4096	0.3821	0.4554	0.6694	0.5573	0.2789	0.3465	0.2243	0.4309	0.192	0.2994	0.445	0.4623	0.109	0.3365	0.5845	0.3025	0.5325	0.6154	0.117	0.4908	0.6327	0.4545	0.1957	0.3383	0.4125	0.1434	0.2624	0.2485	0.2608	0.7261	0.5328	0.2809
C1orf159	10	AT	10.2			0	1	0.6594	0.0496	0.116	0.0824	0	0	0.0425	0	0.0384	0.0164	0.0926	0.0252	0.0172	0.0979	0	0	0.1597	0.0593	0	0.0163	0.0564	0.0109	0.0686	0	0.0768	0.0816	0.0236	0.0219	0.0479	0.0504	0.0604	0	0	0	0	0	0.1068	0	0	0	0.0245	0.0378
C1orf159	11	AT	12			0	1	0.6594	0.0496	0.884	0.9176	1	1	0.9575	1	0.9616	0.9836	0.9074	0.9748	0.9828	0.9021	1	1	0.8403	0.9406	1	0.9837	0.9436	0.9891	0.9314	1	0.9232	0.9184	0.9764	0.9781	0.9521	0.9496	0.9396	1	1	1	1	1	0.8932	1	1	1	0.9755	0.9622
C1orf159	12	RI	11.2	11.1	11.3	0	0.9529	0.8341	0.1524	0.7784	0.7264	0.6657	0.7768	0.6351	0.6509	0.6654	0.7392	0.5776	0.8227	0.8405	0.6275	0.8703	0.7768	0.4469	0.6351	0.3671	0.8598	0.8439	0.7191	0.6911	0.5224	0.8302	0.8086	0.7885	0.6704	0.4405	0.8868	0.6788	1	0.6654	1	0.4653		0.9043	0.5241	0.6922	1	0.8302	0.6788
C1orf159	13	AD	11.2:11.3	11.1	12	0	0.9808	0.963	0.1782	0.5767	0.6567	0.5348	0.3889	0.3465	0.3828	0.2458	0.4846	0.3636	0.3302	0.5139	0.3114	0.2592	0.3985	0.4685	0.089	0.2192	0.6201	0.3733	0.5177	0.438	0.3764	0.6332	0.3829	0.3581	0.3838	0.3583	0.6731	0.3735	0.4792	0.5225	0.6372	0.3987		0.4627	0.3566	0.4994	0.6259	0.5355	0.3202
C1orf159	14	ES	11.3	11.1	12	0	0.8674	1	0.1853	0.2863	0.408	0.3669	0.1823	0.2679	0.2643	0.1573	0.2816	0.3831	0.104	0.1947	0.2597	0.0649	0.1655	0.5409	0.0778	0.3524	0.245	0.1102	0.3279	0.3428	0.3534	0.3085	0.1511	0.1565	0.2386	0.4289	0.2515	0.2407		0.4074		0.4363	0.4379	0.0962	0.3357	0.3473		0.225	0.2237
C1orf159	15	ES	9	8	10.1	0	0.9145	0.1294	0.0204	0.0445	0	0	0	0	0	0	0	0	0	0	0	0	0	0	0		0	0	0.0122	0	0.0381	0	0.0224	0	0	0	0.0109	0	0.0783	0	0	0		0	0	0		0	0.0472
C1orf159	16	RI	5.4	5.3	5.5	0	0.8045	0.7525	0.1553	1	0.6893	1	0.7081	0.7669	0.7116	1	1	1	0.8044	0.9393	0.5069	0.4967	1		1		1	0.9231	0.7247		0.5352	0.9021	1	0.6814	0.852	0.7475	0.8896	0.3968		1	0.644	0.3115		1		1		0.7475
C1orf159	17	RI	5.2:5.3:5.4	5.1	5.5	0	0.815	0.8203	0.1532	1	1	1	1	1	1	1	1	1	1	0.9381	0.5059		1	1	0.5299		1	1	0.8746	1		0.8561	1		0.7806	1	0.8635			1	1			1				1	0.2341
C1orf159	20	AA	5.1:5.2:5.3:5.4	4.4	5.5	0	0.9459	1	0.1546	0.3283	0.1149	0.1548	0.0792	0.2216	0.1449	0.1242	0.0541	0.1657	0.0914	0.1571	0.0533	0.0058	0.1392	0.1065	0.06		0.1484	0.1218	0.1214	0.0914	0.0168	0.2458	0.1363	0.0265	0.0638	0.2843	0.1578		0.0637	0.1014	0.2553			0.1005	0	0.0134	0.0981	0.0532	0.1154
C1orf159	21	AA	5.3:5.4	4.4	5.5	0	0.7976	0.4109	0.0619	0.2202	0	0	0.0524	0	0	0	0.0395	0	0	0.0306	0.0118	0.0442	0	0	0		0	0	0	0	0.0699	0.1067	0	0.0401	0.0363		0	0.194		0.1611		0.2593		0	0.0061	0.1011		0.0812	0.1429
C1orf159	22	ES	5.1:5.2:5.3	4.4	5.5	0	0.8168	0.5407	0.0653	0	0.0375	0	0.055	0.0662	0.0637	0	0	0.0769	0.0351	0.0159	0.0577	0.0034	0.043	0	0.0184		0	0.0091	0.06	0	0.0154	0.0597	0	0.017	0.0133	0.1304	0.0242			0.0367				0	0	0		0.0364
C1orf159	23	ES	5.3	4.4	5.5	0	0.7557	0.436	0.0327	0	0	0	0.0272	0	0	0	0	0	0	0.0028	0.0115	0.024	0	0	0		0	0	0	0	0.0614	0.0178	0	0.0212	0.0065		0			0.0429		0.436	0.1833	0	0.0196	0		0.0468
C1orf159	24	ES	5.1	4.4	5.5	0	0.7749	0.3997	0.0688	0.0574	0	0.075	0	0	0.013	0	0	0	0	0.0199	0.0642	0.0623	0	0	0.0289		0.0056	0.017	0.0182	0	0	0.0381	0.0194	0.0437	0.0247		0.0324			0.0381				0	0	0.0054		0	0.3223
C1orf159	25	RI	4.3	4.2	4.4	0	0.7644	0.6197	0.0606	0.0519	0.0426	0.0722	0.0399	0.0302	0.0381	0.0577	0.0367	0.1026	0.0426	0.0274	0.0378	0.0287	0.0332	0	0.0121	0.0239	0.0388	0.0332	0.0484	0	0	0.087	0.0141	0.1305	0.0149	0.0257	0.036	0.021		0	0	0.0541		0.0467	0.0288	0.0532		0.0094
TNFRSF18	33	AP	2.1			0	0.8778	0.7516	0.1708	0.3155	0.0946	0.2152	0.397	0.1777	0.246	0.0447	0.1185	0.3352	0.1656	0.2838	0.1619	0.0672	0.0531	0.3508		0.2848	0.2884	0.0467	0.4085	0	0.1209	0.4788	0.2416	0.0646	0.1439	0	0.2985	0.3719	0	0.2465			0.1314	0.2744	0	0.0514	0.3549	0.0835	0
TNFRSF18	34	AP	1			0	0.8778	0.7516	0.1708	0.6845	0.9054	0.7848	0.603	0.8223	0.754	0.9553	0.8815	0.6648	0.8344	0.7162	0.8381	0.9328	0.9469	0.6492		0.7152	0.7116	0.9533	0.5915	1	0.8791	0.5212	0.7584	0.9354	0.8561	1	0.7015	0.6281	1	0.7535			0.8686	0.7256	1	0.9486	0.6451	0.9165	1
TNFRSF18	35	AD	4.2	4.1	5.1	0	0.8237	0.3825	0.0537	0.9673	0.9588	0.8507	0.9321	1	0.9105	0.9804	0.9462		0.9455	0.9406	0.9339	0.9187	0.9417	0.8988		0.9545	0.9707	0.9365	0.97	1	1	0.9467	1	0.9616	0.9753		0.9453	0.9627	1	0.8847			1	0.8945	1	0.9717	1	0.9321	1
TNFRSF18	36	ES	4.1:4.2:5.1	3	5.2	0	0.9634	0.236	0.0209	0.9925	0.9937	1	1	1	0.9858	0.9792	0.9883	1	0.9663	0.9933	0.9436	1	1	1	1	1	0.9828	0.9921	1	1	1	1	0.9636	0.9958	0.9687	1	0.9799	0.9793	0.9531	1	1	1	1	1	0.9574	0.9869	1	0.9914	1
SDF4	38	AT	8.2			0	1	0.0397	0.0051	0.9659	0.9899	1	0.9988	1	1	1	0.9987	1	0.9963	0.9963	0.9989	0.9984	1	1	1	1	0.9979	0.9947	0.9914	1	0.9959	1	0.9937	0.9981	1	0.987	1	0.9904	1	0.9943	1	0.9919	1	0.9972	1	0.9924	1	1	1
SDF4	39	AT	5			0	1	0.0397	0.0051	0.0341	0.0101	0	0.0012	0	0	0	0.0013	0	0.0037	0.0037	0.0011	0.0016	0	0	0	0	0.0021	0.0053	0.0086	0	0.0041	0	0.0063	0.0019	0	0.013	0	0.0097	0	0.0057	0	0.0081	0	0.0028	0	0.0076	0	0	0
SDF4	40	AA	8.1	7	8.2	0	1	0.1111	0.0169	0.0152	0.0351	0.047	0.0524	0.0348	0.0412	0.0237	0.0359	0.0337	0.0469	0.0538	0.0672	0.0218	0.0383	0.0287	0.0426	0.0412	0.0425	0.0356	0.0263	0.0458	0.0344	0.037	0.0496	0.0472	0.0482	0.0341	0.047	0.0613	0.0392	0.0155	0.0336	0.0314	0.0395	0.0473	0.0235	0.0462	0.0537	0.0366	0.038
SDF4	41	AA	6.1	4	6.2	0	0.9983	0.1069	0.0125	0.0236	0.0029	0.0034	0.0203	0.0305	0.0056	0.015	0.0015	0.003	0.0099	0.0278	0.0099	0.0056	0.006	0.0056	0.0094	0.0111	0.0041	0.0064	0.0167	0.0049	0.0069	0.0096	0.0166	0.0069	0.0057	0	0.0111	0.0136	0.0162	0.0051	0.0117	0.0146	0	0.0247	0.0018	0.0049	0.0051	0.0047	0.0053
UBE2J2	47	ES	6.1:6.2	5	7	0	1	0.7193	0.0446	0.0668	0.0322	0.0226	0.0513	0.0559	0.0096	0.0364	0.0126	0.0193	0.0296	0.0415	0.0279	0.0051	0.0671	0.0371	0.0247	0.0344	0.0143	0.0186	0.0443	0.0241	0.0206	0.0168	0.0404	0.0239	0.0218	0.0203	0.0282	0.0041	0.0034	0.0082	0.0048	0.0464	0.0215	0.0194	0.0055	0.0163	0.0193	0	0.0067
UBE2J2	48	ES	6.1	5	7	0	0.9983	0.2947	0.0429	0	0.0572	0.0479	0.0743	0.0252	0.0977	0.0775	0.0367	0.0773	0.0132	0.0391	0.0464	0.0413	0.0138	0	0.0543	0.0948	0.0991	0.18	0.0438	0.0311	0.0169	0.0618	0.0654	0.0933	0.0671	0.01	0.0523	0.1272	0.0571	0.0957	0.1153	0.0567	0.0529	0.053	0.0674	0.0679	0.1853	0.0887	0.007
UBE2J2	52	ES	4	2.1	5	0	1	0.2056	0.0241	0.0309	0.0395	0.0407	0.0287	0.0434	0.0297	0.1019	0.0597	0.0405	0.0292	0.0576	0.0285	0.0492	0.0617	0.0243	0.0301	0.0572	0.0519	0.0273	0.0251	0.057	0.0375	0.0318	0.0721	0.0389	0.0368	0.058	0.0289	0.0748	0.0405	0.0432	0.0329	0.0464	0	0.0668	0.0163	0.0386	0.0389	0.0498	0.0531
UBE2J2	53	ES	2.2:3	2.1	5	0	1	0.2208	0.0181	0.0273	0	0.0029	0	0.0185	0	0.0055	0.0019	0.007	0.0047	0	0.0034	0.0032	0.0101	0.0095	0.0061	0.0039	0	0.0046	0	0.0105	0.0057	0.0038	0.0123	0.0045	0	0.0048	0	0.0035	0.0018	0	0	0	0.0011	0.0059	0	0	0.0058	0	0.0033
UBE2J2	54	ES	3	2.1	5	0	1	0.1297	0.0168	0	0.0153	0.0041	0.0292	0	0.0241	0.008	0.0029	0.0101	0.0076	0.0235	0.0049	0.0051	0.0166	0.0139	0.0096	0.0207	0.0243	0.0075	0.0168	0.0164	0.0104	0.006	0.019	0.0069	0.0207	0.0079	0.0142	0.0061	0.0158	0.0072	0.0208	0.023	0.0016	0.0086	0.0134	0.009	0.0109	0.0373	0.0056
UBE2J2	55	AD	2.2	2.1	5	0	1	0.1848	0.0235	0.012	0.0366	0.021	0.02	0.0071	0.029	0.0401	0.0531	0.0957	0.032	0.0303	0.042	0.0314	0.0703	0.0399	0.0237	0.0032	0.0294	0.0322	0.048	0.0737	0.0554	0.063	0.0238	0.0839	0.064	0.0431	0.0454	0.0416	0.0022	0.0305	0.0325	0.0337	0.0199	0.0382	0.0256	0.0394	0.0921	0.0443	0.0365
UBE2J2	63	ES	2.1:2.2	1.1	5	0	0.7644	0.9922	0.2036	0.2115	0.7865	0.5104	0.3379		0.3154	0.4642	0.5486	0.6391	0.3709	0.53	0.63	0.531	0.8375		0.4279		0.6797	0.8669	0.3449	0.5269	0.6299	0.8672	0.6508	0.668	0.4921	0.531	0.6186	0.7145		0.4027	0.3638	0.4013	0.211	0.6562	0.5041	0.6289	0.6241	1	0.5862
UBE2J2	65	ES	2.1	1.1	5	0	1	0.3421	0.0274	0.9575	0.99	0.9805	0.9705	1	0.9429	0.9672	0.9634	0.9657	0.9443	0.9771	0.9806	0.9741	0.9876	0.9656	0.9691	1	0.9893	0.9955	0.9242	0.9454	0.9671	0.9912	0.9899	0.9556	0.9457	0.974	0.9736	0.9852	0.989	0.9529	0.9523	0.9537	0.9402	0.9831	0.981	0.9791	0.9495	1	0.976
UBE2J2	66	AD	1.2	1.1	2.1	0	0.9791	0.2234	0.0239	0.013	0	0.036	0.0186	0.0512	0.0172	0.0631	0.0552	0.006	0.0508	0.0122	0.0264	0.016	0.0054	0	0.1356	0.0076	0.0973	0.0598	0.0493	0.0225	0.0107	0.0166	0.0259	0.0295	0.0228	0	0.0282	0	0	0	0.0035	0.0041	0	0.0092	0.0574	0.0224	0	0.0492	0.0136
ACAP3	74	ES	21	20	22	0	0.9913	0.1874	0.0368	1	0.9191	0.9827	1	0.9616	0.9187	0.9588	1	0.9576	0.9581	0.9675	0.9801	0.9743	0.9674	0.945	0.9507	1	0.9886	1	0.8803	1	0.9029	0.9055	0.9809	0.848	0.9036	0.9772	0.9816	1	1	0.9671	0.9621	0.9592	1	0.985	1	0.9897	1	0.9861	1
CPSF3L	80	AA	11.1	10	11.2	0	1	0.5464	0.0797	0.1273	0.0644	0.0417	0.1434	0.1506	0.0517	0.1183	0.093	0.1774	0.1044	0.162	0.0952	0.0329	0.1342	0.1179	0.0512	0.0896	0.0502	0.1902	0.1286	0.1167	0.0625	0.1288	0.1971	0.0957	0.1223	0.1212	0.1476	0.0357	0.0522	0.0608	0.0621	0.0351	0.0665	0.0674	0.0107	0.1024	0.0533	0.0855	0.0507
CPSF3L	81	ES	00:10:11.100000	9	11.2	0	0.9546	0.4399	0.0852	0.9218	1	1	0.9233	0.8465	0.5821	0.8988	1	1	0.9275	1	0.9146	1	1	1	0.8573	1	1	1	0.8517	1	0.8393	1	0.9471	1	0.8851	0.7911	0.9579		1	0.6293	0.7015	1	0.7725	1		0.9162		1	1
CPSF3L	82	ES	10	9	11.2	0	0.9983	0.0881	0.0098	0.9905	1	1	0.9923	0.9855	0.978	0.9914	1	1	0.995	1	0.9947	1	1	1	0.9952	1	1	1	0.9863	1	0.9927	1	0.9913	1	0.9897	0.9826	0.9957	1	1	0.9813	0.9861	1	0.9877	1	1	0.9941	1	1	1
CPSF3L	83	AA	7.1	6.2	7.2	0	1	0.0866	0.0128	0.9665	0.9715	0.9557	0.9911	1	0.9721	0.993	0.9856	0.9824	0.9951	0.9745	0.9953	0.9929	1	0.9695	0.9849	1	0.9833	0.9765	0.9796	0.9851	0.9683	0.9928	0.9934	0.9691	0.9911	1	0.9766	0.9524	1	0.9803	0.9634	1	0.987	0.9953	0.9834	0.962	0.9773	0.9969	0.9836
CPSF3L	84	AA	6.1	5.2	6.2	0	1	0.1931	0.0185	0.9757	0.9835	0.9836	0.9826	0.9634	0.9802	0.9941	0.9909	0.9687	0.9368	0.9909	0.9895	0.984	0.9595	0.9777	0.997	0.9845	0.9885	0.959	0.9857	0.994	0.9743	0.9831	0.9812	0.987	0.972	0.9456	0.9662	0.9482	0.9739	0.981	0.9682	0.9772	0.9704	0.9818	0.967	0.9822	0.9479	0.9609	0.9724
CPSF3L	85	ES	5.1:5.2:6.1:6.2:7.1:7.2:8	4	9	0	0.9599	0.3826	0.027	1	1	1	1	1	1	1	1	1	1	1	1	1	1	1	1	1	1	1	1	1	1	1	1	1	1	1	1	1	1	1	1	1	1	1	1	1	1	1	1
CPSF3L	86	ES	5.2:6.1:6.2:7.1:7.2:8	4	9	0	0.9983	0.016	0.0011	1	1	1	1	1	1	1	1	1	1	1	1	1	1	1	1	1	1	1	1	1	1	1	1	1	1	1	1	1	1	1	1	1	1	1	1	1	1	1	1
CPSF3L	88	ES	5.2:6.2:7.1:7.2:8	4	9	0	0.8796	0.2843	0.0256	1	1	1	1	1	1		1	1	1	1	1	1	1	1		1	1	1	1		1	1	1	1	1	1	1	1	1	1	1	1	1	1	1	1	1	1	1
CPSF3L	91	ES	5.2:6.1:6.2:7.2:8	4	9	0	0.8691	0.2781	0.0252	1	1	1	1		1	1	1	1	1	1	1	1		1	1		1	1	1	1	1	1	1	1	1		1	1		1	1		1	1	1	1	1	1	1
CPSF3L	94	ES	5.1:5.2:6.1:6.2	4	7.1	0	0.9564	0.3348	0.0269	1	1	1	1	1	1	1	1	1	1	1	1	1	1	1	1	1	0.9002	0.9777	0.9712	1	1	1	0.8918	1	1	1	1	1	1	0.9063	1	0.7536	1	1	1	1	1	1	1
CPSF3L	95	ES	5.2:6.1:6.2	4	7.1	0	0.9983	0.014	0.0016	1	1	1	1	1	1	1	1	1	1	1	1	1	1	1	1	1	0.9981	0.9977	0.9976	1	1	1	0.9904	1	1	1	1	1	1	0.995	1	0.9945	1	1	1	1	1	1	1
CPSF3L	97	ES	5.2:6.2	4	7.1	0	0.8551	0.3155	0.043	1	1	1	1	1	1		1	1	1	1	1	1	1	1		1	0.8861	0.9602	0.8831		1	1	0.7046	1	1	1	1	1	1	0.8326	1	0.8385	1	1	1	1	1	1	1
CPSF3L	98	AA	5.1	4	5.2	0	0.9983	0.5178	0.0708	0.1969	0.0205	0.0265	0.1196	0.0918	0.0547	0.0368	0.0277	0.0691	0.0791	0.1201	0.0545	0.014	0.045	0.0404	0.0165	0.0159	0.0211	0.1178	0.0956	0.0109	0.0122	0.0778	0.0973	0.0645	0.0666	0.0403	0.1101	0.0726	0.0852	0.0588	0.0234	0.0206	0.025	0.058	0.01	0.1149	0.0915	0.041	0.0349
CPSF3L	120	ES	4:5.1:5.2:6.1:6.2	1	7.1	0	0.7557	0.7004	0.1212	1		1	1	1	0.6307	1	1	0.7934	0.7263	0.8278	1	1		1			1	1	1	0.5948		0.8249	1	1	0.9364		1			1	1	0.7009	1	0.813		0.9581		0.8322
CPSF3L	124	ES	4:5.2:6.1:6.2	1	7.1	0	0.9983	0.0429	0.0038	1	0.9969	1	1	1	0.9949	1	1	0.9882	0.9953	0.9962	1	1	1	1	1	1	1	1	1	0.994	1	0.9975	1	1	0.9975	1	1	1	1	1	1	0.9942	1	0.9981	0.9963	0.9967	1	0.9956	1
CPSF3L	132	ES	4:5.2:6.2	1	7.1	0	0.8866	0.7082	0.0949	1	0.8713	1	1	1	0.8522		1	0.7491	0.9511	0.7714	1	1	1	1		1	1	1	1		1	0.895	1	1	0.9382	1	1	1	1	1	1	0.8346	1	0.9258	0.9206	0.8889	1	0.9236	1
CPSF3L	138	ES	2.1:2.2:3	1	4	0	0.9948	1	0.0618	0.0575	0.0271	0.0051	0.0005	0.0104	0	0.0175	0.0048	0.0289	0.0101	0.0226	0.0115	0.0157	0.0131	0.0014	0.0062	0.011	0.0048	0.0437	0.0158	0.0117	0.0152	0.0027	0.0316	0.0008	0.0024	0.0097	0.0127	0.0006	0.0058	0.002	0.0054	0.0129	0.0057	0.0116	0.0128	0.0075	0.0039	0.0098	0.0139
CPSF3L	139	ES	2.1:3	1	4	0	0.9843	0.1123	0.0153	0	0	0	0.0011	0	0.0224	0	0	0	0.0238	0.0151	0	0.0304	0	0.0029	0	0.016	0	0.0223	0.0033	0	0	0.0064	0	0.0034	0.0008	0.0174	0.0216	0.0025	0	0.0057	0.0094	0	0.0039	0.0132	0	0	0	0.0123	0
CPSF3L	140	ES	2.1	1	4	0	0.986	0.2341	0.0349	0	0	0.0389	0	0.0308	0.0116	0	0	0.0446	0.0076	0.0272	0.0243	0.0448	0	0	0	0.0035	0.0102	0.119	0.0023	0	0	0.026	0.0173	0.0047	0.0011	0.0159	0.0814	0.0035	0.1182	0.0506	0.0025	0.0329	0.0055	0.0316	0	0	0	0.0063	0.0598
DVL1	141	AD	11.2	11.1	12	0	0.9878	0.8944	0.1676	0.2511	0.4787	0.2976	0.3743	0.5263	0.4299	0.3718	0.6595	0.6932	0.8427	0.4499	0.5479	0.7694	0.4043	0.4758	0.2727	0.4548	0.4612	0.7921	0.4466	0.4305	0.533	0.7825	0.6978	0.6975	0.4426	0.7809	0.603	0.4807	0.4475	0.6008	0.2447	0.7554	0.6473	0.6913	0.451	0.5029	0.5618	0.7451	0.413
MXRA8	142	AP	1			0	0.9878	0.5077	0.0581	0.009	0.0115	0.0515	0.0097	0.0611	0.0106	0.0034	0	0.0354	0.0724	0.0117	0.0098	0.0105	0.0555	0.0247	0.0315	0	0.0135	0.0202	0.073	0.0145	0.0011	0.0512	0.0261	0.0014	0.0102	0.0413	0.0289	0.0315	0	0.0057	0.0557	0.0054	0.012	0.0538	0.0034	0.0022	0	0.0156	0.0081
MXRA8	143	AP	2			0	0.9878	0.5077	0.0581	0.991	0.9885	0.9485	0.9903	0.9389	0.9894	0.9966	1	0.9646	0.9276	0.9883	0.9902	0.9895	0.9445	0.9753	0.9685	1	0.9865	0.9798	0.927	0.9855	0.9989	0.9488	0.9739	0.9986	0.9898	0.9587	0.9711	0.9685	1	0.9943	0.9443	0.9946	0.988	0.9462	0.9966	0.9978	1	0.9844	0.9919
MXRA8	144	AA	11.1	10.2	11.2	0	1	0.1209	0.0139	0.9448	0.9699	0.9862	0.9889	1	0.9726	0.9893	0.9831	0.9854	1	0.9862	0.9909	0.9908	0.9856	0.9818	1	0.9945	0.9886	0.9947	0.9778	0.9856	0.9657	0.9894	0.9689	0.9641	0.9756	1	0.9913	0.9125	0.9818	0.9924	0.9708	0.9716	0.9897	1	0.9948	0.9457	0.9896	0.9875	0.9927
MXRA8	145	AA	10.1	9	10.2	0	1	0.2232	0.0221	0.0223	0	0.0107	0.0064	0.0261	0.023	0.0068	0.0232	0	0.0167	0.0121	0.0057	0.007	0.0119	0	0	0	0.01	0.0134	0.0154	0	0	0.0355	0	0.0047	0.0063	0	0.0067	0	0.0081	0	0	0.0203	0	0.056	0.0039	0.0093	0	0	0.0129
MXRA8	146	ES	4	3	5	0	0.9895	0.2831	0.0333	0.9242	0.9821	0.976	0.9587	0.9161	0.9005	0.9374	0.967	1	0.9575	0.9696	0.9474	0.9453	1	0.8644	0.7169	0.9833	1	1	1	0.9605	0.9796	0.9507	0.9844	0.9837	0.9382	1	1	1	1	0.9781	1	0.9537	0.9759	0.9411	0.9613	0.9351	0.9184	1	1
AURKAIP1	147	RI	1.4	1.3	1.5	0	0.9756	0.7409	0.1173	0.3035	0.3035	0.3052	0.3745	0.2009	0.3051	0.4103	0.1875	0.3238	0.1916	0.2746	0.1618	0.2779	0.2032	0.1833	0.1302	0.3543	0.2443	0.2613	0.3687	0.491	0.3199	0.3794	0.287	0.3505	0.3627	0.2549	0.2643	0.1833	0.0727	0.2369	0.1407	0.1497	0.1555	0.1664	0.1873	0.1493	0.2632	0.2279	0.206
AURKAIP1	148	RI	1.3:1.4	1.2	1.5	0	0.9651	0.7386	0.1515	0.8702	0.6083	0.9186	0.7866	0.3831	0.5738	0.786	0.6451	0.4862	0.6392	0.7073	0.5504	0.7038	0.7558	0.3923	0.6472	1	0.6612	0.6649	0.7819	0.8943	0.5266	0.9256	0.7666	0.7582	0.823	0.6771	0.857	0.5867	0.3423	0.581	0.4741	0.5181	0.7649	0.5727	0.7878	0.7717	0.9123	0.7205	0.5694
AURKAIP1	149	AD	1.3	1.2	1.5	0	0.9738	0.2889	0.0491	0.9613	0.846	0.9701	0.911	0.799	0.8219	0.8686	0.9305	0.8343	0.9288	0.9064	0.9053	0.9145	0.9487	0.8179	0.9406	1	0.9143	0.8989	0.8981	0.9278	0.7796	0.9763	0.9225	0.9017	0.9211	0.9302	0.9563	0.9035	0.9168	0.8683	0.8963	0.8949	0.9573	0.909	0.9606	0.9667	0.9685	0.9326	0.8798
AURKAIP1	150	RI	1.2:1.3:1.4	1.1	1.5	0	0.986	0.357	0.044	0.0833	0.0409	0.0472	0.0831	0.045	0.0512	0.1082	0.0335	0.0204	0.0248	0.0651	0.0311	0.0529	0.0528	0.0275	0.0261	0.0915	0.0422	0.0685	0.0661	0.0676	0.0447	0.0589	0.0739	0.054	0.0854	0.0369	0.0553	0.038	0.0155	0.0753	0.0395	0.0294	0.0481	0.0308	0.0466	0.0303	0.0852	0.0602	0.0317
AURKAIP1	151	AD	1.2:1.3	1.1	1.5	0	0.9825	0.4694	0.0583	0.2175	0.1161	0.1131	0.1738	0.2061	0.134	0.1667	0.1775	0.0861	0.1349	0.2003	0.1711	0.1724	0.2383	0.1393	0.1604	0.159	0.1661	0.2191	0.1308	0.0843	0.1115	0.1474	0.1936	0.1218	0.1677	0.1692	0.1508	0.1762	0.2169	0.2497	0.2532	0.1695	0.2262	0.1626	0.2139	0.185	0.1869	0.222	0.1331
AURKAIP1	152	AD	1.2	1.1	1.5	0	0.9843	0.3807	0.0193	0.0087	0.0237	0.0047	0.0167	0.0523	0.027	0.0323	0.0135	0.0161	0.0096	0.0248	0.0169	0.0153	0.017	0.0273	0.0096	0	0.0146	0.0261	0.0155	0.006	0.0288	0.0034	0.016	0.012	0.015	0.0122	0.0065	0.0175	0.0196	0.0413	0.0353	0.0207	0.0109	0.0149	0.0095	0.0067	0.0062	0.0166	0.018
CCNL2	155	AT	12			0	1	0.7208	0.0939	0.5977	0.6484	0.5615	0.6979	0.6575	0.5561	0.7371	0.5289	0.6476	0.7372	0.6266	0.5969	0.698	0.6535	0.5464	0.6168	0.5797	0.7447	0.6273	0.6829	0.7049	0.6983	0.651	0.6177	0.6068	0.6498	0.6029	0.6521	0.6567	0.5945	0.4901	0.6214	0.6344	0.7109	0.6537	0.2925	0.5447	0.6142	0.6801	0.7555
CCNL2	157	AT	6.3			0	1	0.7208	0.0939	0.4023	0.3516	0.4385	0.3021	0.3425	0.4439	0.2629	0.4711	0.3524	0.2628	0.3734	0.4031	0.302	0.3465	0.4536	0.3832	0.4203	0.2553	0.3727	0.3171	0.2951	0.3017	0.349	0.3823	0.3932	0.3502	0.3971	0.3479	0.3433	0.4055	0.5099	0.3786	0.3656	0.2891	0.3463	0.7075	0.4553	0.3858	0.3199	0.2445
CCNL2	158	AA	7.1	6.1	7.2	0	0.8621	0.2958	0.0518	0.8949	1		0.9493	0.9705	1	1	1	1		0.8343	0.9572	1	1		0.7527	1	0.955	0.802	0.892	1		1	1		0.8146	1	1	0.9397	1	1			1	0.9913	1	0.9014
CCNL2	160	ES	6.1:7.1	5	7.2	0	0.9843	1	0.2805	0.4118	0.4093	0	0.4211	0.835	0.787	0.7878	0.4611	0.5551	0	0.2452	0.4971	0.3817	0.5241	0	0.1577	0.6875	0.3286	0.1661	0.4546	0.5487	0	0.6024	0.8486	0	0.2931	0.7418	0.5869	0.8069	0.5743	0.7038	0	0	0.4254	0.6629	0.2168	0.2838		0	0
CCNL2	161	ES	6.1:6.2	5	7.2	0	0.9354	0.7118	0.1407	0	0.0376	0	0.0513	0.099	0.123	0.112	0.0408	0	0.0868	0.0615	0.0613	0	0.1197	0	0.0984	0	0.031	0.1047	0.0996	0	0.0955	0.2661	0.1475	0.0443	0.032	0.0763	0.1706	0.3244		0	0	0	0	0.072	0	0.1794		0.2888	0
CCNL2	162	ES	6.1	5	7.2	0	0.9127	0.6342	0.0775	0.0769	0	0.0821	0.039	0.139	0	0	0	0	0.0698	0.0611	0.0442	0	0	0	0.0572	0	0.0231	0.0487	0.0938	0	0	0	0	0	0.0899	0	0	0.2243		0	0.0715	0.0428	0	0.0176	0	0.0419		0.0404	0
CCNL2	163	AA	4.1	3	4.2	0	1	0.1234	0.0139	0.0244	0.0225	0	0.0324	0.0149	0.0098	0	0	0	0	0.0115	0	0	0	0	0	0	0.0065	0.0086	0.0079	0.0215	0.0156	0.0051	0.0185	0	0.0108	0.0249	0.0142	0	0	0	0.0124	0.0302	0	0.0033	0	0.0087	0	0	0
CCNL2	164	AD	1.2	1.1	2	0	0.993	0.1978	0.0213	0.0104	0.0171	0	0.0198	0.035	0.0204	0.0149	0.0207	0.0241	0	0.0206	0.005	0	0.048	0.0152	0	0.0277	0.0086	0.0254	0.0245	0	0.0485	0.0293	0	0.0122	0.0131	0	0.0114	0.0365	0.0271	0.0216	0.0226	0	0	0	0	0.0237	0.0417	0	0.0333
MRPL20	165	AT	4			0	1	0.305	0.0344	0.94	0.9657	0.9873	0.9571	0.9461	0.9778	0.9729	0.9843	0.9429	0.9665	0.9513	0.9826	0.9874	0.9322	0.9552	0.9786	0.9692	0.9796	0.9699	0.9566	0.972	0.9822	0.9711	0.9534	0.9786	0.9851	0.959	0.9606	0.9836	0.9862	0.9809	0.9851	0.9918	0.9856	0.9761	0.9959	0.9881	0.9847	0.971	0.9809
MRPL20	166	AT	3.2			0	1	0.305	0.0344	0.06	0.0343	0.0127	0.0429	0.0539	0.0222	0.0271	0.0158	0.0571	0.0335	0.0487	0.0174	0.0126	0.0678	0.0448	0.0214	0.0308	0.0204	0.0301	0.0434	0.028	0.0178	0.0289	0.0466	0.0214	0.0149	0.041	0.0394	0.0164	0.0138	0.0191	0.0149	0.0082	0.0144	0.0239	0.0041	0.0119	0.0153	0.029	0.0191
ANKRD65	167	ES	2	1.4	3	0	0.897	1	0.1684	0.4209	0.0434	0.0374	0.0788	0.1316	0.083	0.0467		0.0909	0.2381	0.4393	0.0203	0.0594	0.0618	0.3863				0.0139	0.1123	0.0144	0.079	0.09	0.0415	0.0588	0.0432	0.0585	0.049		0.822	0.1539		0.2717	0.3774	0.0212	0.0183	0.2609	0.0126	0.1666	0.1086
ANKRD65	168	ES	1.4:2	1.3	3	0	0.8551	0.9795	0.2355	0.6382	0.148	0.206	0.2895	0.3866	0.1575	0.1196			0.5744	0.7934	0.0893	0.1276	0.539	1			0.3143	0.0438	0.4147	0.0581	0.2504	0.3105	0.1818	0.2182	0.1502	0.1046	0.2002		1	0.7079		1	0.6384	0.0657	0.0512	0.38	0.0753	0.2808	0.2447
ANKRD65	169	AD	1.4	1.3	3	0	0.8447	0.5194	0.0754	0.8056	0.8431	0.8784	0.888	0.8635	0.7877	0.8021		0.7669	0.8422		0.8467	0.7634	0.9575			0.5069	0.8223	0.7926	0.8969	0.8469	0.8355	0.8623	0.8773	0.8492	0.8527	0.6581	0.872			0.9556				0.8064	0.7464	0.666	0.8876	0.6834	0.7623
ANKRD65	170	RI	1.2	1.1	1.3	0	0.897	0.8799	0.1664	0.3703	0.333	0.3957	0.543	0.4917	0.8285	0.6467		0.2904	0.5325	0.5057	0.6608	0.3838	0.4404	0.4501	0.6001	0.7306		0.7891	0.3871	0.5798	0.5286	0.4511	0.5663	0.6691	0.5801	0.4501	0.3596		0.4501	0.3001	0.7106			0.4081	0.498	0.8604	0.6718	0.3448	0.3365
VWA1	171	AA	2.1	1	2.2	0	1	0.0892	0.0109	0.9719	0.9723	0.9828	0.9906	0.9799	0.9766	0.985	0.9911	0.9935	0.9569	0.9921	0.9936	0.9853	0.9803	0.9879	1	0.9676	0.9811	0.9934	0.9817	0.9918	0.9646	0.9914	0.9836	0.9854	0.9903	0.9863	0.987	0.9715	0.9858	0.9932	0.9866	0.9814	0.9793	0.9948	0.9743	0.9932	0.9755	0.975	0.9942
ATAD3B	172	AT	8			0	0.9983	0.4133	0.0329	0.0458	0.019	0	0.0106	0.0148	0	0.017	0.0088	0	0.0212	0.0334	0	0	0.0475	0.0517	0.004	0	0.0042	0.0176	0.0037	0	0.0301	0.0193	0.1124	0	0.0072	0.0592	0.0332	0	0	0	0	0	0.0383	0.0223	0	0	0	0.009	0.0199
ATAD3B	173	AT	17			0	0.9983	0.4133	0.0329	0.9542	0.981	1	0.9894	0.9852	1	0.983	0.9912	1	0.9788	0.9666	1	1	0.9525	0.9483	0.996	1	0.9958	0.9824	0.9963	1	0.9699	0.9807	0.8876	1	0.9928	0.9408	0.9668	1	1	1	1	1	0.9617	0.9777	1	1	1	0.991	0.9801
ATAD3A	174	AP	1			0	0.9773	0.6416	0.0927	0.8658	0.814	0.9472	0.9724	0.9538	0.9163	0.906	0.9461	0.947	0.847	0.9166	0.9283	0.846	0.9231	0.8507	0.8835	0.9399	0.9644	0.881	0.8729	0.9667	0.9428	0.8543	0.8866	0.831	0.9695	0.678	0.9178	1	0.7773	0.9371	1	0.9159	0.9654	1	0.8505	0.7458	0.8341	0.8073	0.9118
ATAD3A	175	AP	2			0	0.9773	0.6416	0.0927	0.1342	0.186	0.0528	0.0276	0.0462	0.0837	0.094	0.0539	0.053	0.153	0.0834	0.0717	0.154	0.0769	0.1493	0.1165	0.0601	0.0356	0.119	0.1271	0.0333	0.0572	0.1457	0.1134	0.169	0.0305	0.322	0.0822	0	0.2227	0.0629	0	0.0841	0.0346	0	0.1495	0.2542	0.1659	0.1927	0.0882
ATAD3A	176	AA	4.1	3	4.2	0	0.9913	1	0.1865	0.4712	0.2327	0.1033	0.3068	0.4262	0.09	0.1594	0.104	0.275	0.2103	0.3145	0.1533	0.0326	0.2454	0.1838	0.1939	0.1812	0.211	0.2444	0.5236	0.0758	0.205	0.3522	0.3766	0.153	0.1298	0.238	0.3502	0.3216	0.275	0.1824	0.149	0.1765	0.0239	0.3457	0.0427	0.1966	0.5323	0.2098	0.2098
SSU72	179	AT	2.2			0	1	0.454	0.0488	0.0398	0.1674	0.0664	0.0511	0.0631	0.0562	0.0384	0.0215	0.1374	0.0453	0.0264	0.0563	0.0678	0.0276	0.0276	0.0185	0.0668	0.0249	0.0157	0.2111	0.0846	0.1405	0.0426	0.0669	0.0721	0.0583	0.1136	0.063	0.0437	0.0262	0.0249	0.0345	0.025	0.1156	0.0654	0.0225	0.0556	0.0114	0.0138	0.0747
SSU72	180	AT	5			0	1	0.454	0.0488	0.9602	0.8326	0.9336	0.9489	0.9369	0.9438	0.9616	0.9785	0.8626	0.9547	0.9736	0.9437	0.9322	0.9724	0.9724	0.9815	0.9332	0.9751	0.9843	0.7889	0.9154	0.8595	0.9574	0.9331	0.9279	0.9417	0.8864	0.937	0.9563	0.9738	0.9751	0.9655	0.975	0.8844	0.9346	0.9775	0.9444	0.9886	0.9862	0.9253
MIB2	181	AP	2			0	0.9773	0.7182	0.1134	0.0781	0.2475	0.3394	0.3686	0.2614	0.4048	0.4034	0.2215	0.1478	0.3514	0.2106	0.1217	0.2332	0.1685	0.361	0.2251	0.4566	0.3169	0.29	0.2835	0.2253	0.2699	0.2288	0.3652	0.1316	0.2387	0.2077	0.1942	0.3137	0.1932	0.1713	0.1019	0.2684	0.2391	0.1053	0.1651	0.1886	0.5426	0.3882	0.3185
MIB2	182	AP	4			0	0.9773	1	0.1011	0.2073	0.0579	0.0563	0.0436	0.0205	0.0718	0	0.062	0.0983	0.0519	0.098	0.0405	0	0.0747	0.0369	0.0665	0	0.0222	0.0175	0.0722	0.0499	0	0.0387	0.1619	0.0117	0	0.0552	0.0705	0.1391	0.0964	0.0456	0	0	0.0353	0.2201	0	0	0	0.0794	0
MIB2	183	AP	1			0	0.9773	1	0.1307	0.6716	0.6626	0.5577	0.4888	0.6843	0.464	0.5563	0.6012	0.6727	0.543	0.5698	0.7542	0.7215	0.5303	0.4494	0.7084	0.5434	0.6242	0.62	0.5979	0.6835	0.7053	0.6775	0.2052	0.7988	0.716	0.7142	0.6965	0.3173	0.6839	0.5196	0.6182	0.6333	0.7255	0.6085	0.8349	0.6041	0.4574	0.4832	0.6621
MIB2	184	AP	3.1			0	0.9773	0.3526	0.0591	0.0429	0.032	0.0466	0.099	0.0338	0.0593	0.0403	0.1153	0.0812	0.0536	0.1215	0.0836	0.0452	0.2264	0.1526	0	0	0.0367	0.0725	0.0464	0.0413	0.0247	0.0549	0.2676	0.0579	0.0452	0.0228	0.0388	0.2299	0.0265	0.2635	0.2799	0.0983	0	0.0661	0	0.2072	0	0.0492	0.0194
MIB2	188	RI	19.2	19.1	19.3	0	0.8464	0.1954	0.0123	1	1		1	1	1	1	1		1	1	1	1	1	1	1	1	1	1	1		1	1	1	1	1	1	1					1	1	1		1	1	1	0.9351
MIB2	189	ES	19.1:19.2:19.3	18	20	0	0.9476	0.2601	0.03	1	1	1	1	1	0.9334	1	1	1	1	1	1	1	1	1	0.8288	1	1	1	1	1	1	1	1	0.9433	0.9776	1	1			1	1	1	1	1	1	0.8808	1	1	1
MIB2	191	RI	12.2	12.1	12.3	0	0.9546	0.4752	0.0751	0.1559	0.1109	0.0815	0.126	0.0675	0.1474	0.0226	0.0241	0.098	0.2085	0.1407	0.02	0	0.059	0.0515	0.0416	0	0.0607	0.0521	0.2703	0.0374	0	0.0839	0.069	0.0618	0.1013	0.0492	0.1498		0.2318	0	0.0675	0		0	0	0.0381		0.0581	0.0278
MIB2	192	ES	11	10.2	12.1	0	0.9843	0.1811	0.0234	1	0.9699	1	1	1	0.9201	0.9635	1	1	1	0.9936	0.9765	0.9762	1	1	1	1	0.9862	0.9926	0.9816	0.9603	0.976	0.9696	0.9723	0.9699	0.946	1	1		1	1	0.9492	1	0.9359	0.9892	0.9239	1	1	0.9281	0.9723
MIB2	193	AA	10.1	9	10.2	0	0.9668	0.3275	0.0413	1	0.977	1	0.9764	0.9603	0.9156	0.9759	0.9015	1	0.8221	0.8806	0.9635	0.9307	0.9273	1	0.9449	1	0.9539	0.9732	0.9177	1	1	0.9569	0.9064	0.935	0.9698	0.9509	1		1	1	1	0.8879	1	0.986	0.8156	0.8984	0.6725	0.8879	0.9151
MIB2	194	ES	10.1:10.2	9	11	0	0.9843	0.2178	0.0243	1	1	1	0.9814	1	1	0.9801	0.9837	1	0.9791	0.9922	0.9837	1	0.9678	0.946	1	0.9624	0.9682	0.9931	1	1	1	0.9454	1	0.9814	0.9574	0.9685	0.9849		1	1	1	1	1	1	1	1	1	0.9817	0.9683
MIB2	196	ES	8	7	9	0	0.9948	0.2345	0.0302	0.9822	1	0.9711	0.9697	1	0.8936	1	0.9891	1	0.986	1	0.9931	1	0.9745	1	0.9782	1	1	1	0.9353	1	1	0.9746	1	0.9366	0.9808	1	0.9634	1	0.8536	0.9594	1	1	1	1	0.8758	0.9615	1	1	0.9734
MIB2	197	AD	5.4	5.3	6	0	0.8551	0.3152	0.0644	1	0.9426	0.92	0.9641	0.9167	1	0.958	1	1	0.9631	0.95	0.9641	0.8907	1	0.9362	1	0.8996	1	0.9084	0.9288	0.9194	1	0.9613	1	0.922	0.8716	0.9362	0.9607			0.867	0.88	1		1		0.8809		1	0.9036
MIB2	198	AD	5.3:5.4	5.2	6	0	0.9668	0.7099	0.1305	0.7094	0.8298	1	0.8711	0.8001	0.5141	0.8453	0.9671	0.722	0.8857	0.9004	0.8012	0.9561	0.9099	0.8668	0.8824	1	0.7399	0.9456	0.7111	0.9099	0.8502	0.836	0.9327	0.9214	0.7642	0.8879	0.7594	0.4903	0.629	0.5095	0.7767	0.7327	1	0.7637	0.3828	0.774	0.8457	0.9087	0.8927
MIB2	200	AA	5.1	3.2	5.2	0	0.8394	0.9118	0.1383		0.6637	0.4901	0.7147	0.5611	0.6505	0.5752	0.4744	0.8257	0.6154	0.6486	0.4681	0.2758	0.5301	0.7032	0.8257		0.5038	0.6226	0.7303		0.4583	0.5834	0.5983	0.6286	0.6962	0.6037	0.5423		0.7032	0.7303	0.7032			0.8713	0.4901	0.7061	0.8257	0.7303	0.6351
MMP23B	201	RI	3.6	3.5	3.7	0	0.9058	0.3112	0.0305		0	0	0.0417	0.0594	0.0238	0.0275	0.0854		0	0.0351	0.0333	0.0261	0	0		0	0	0.0188	0.0594	0	0	0.0357	0	0.0078	0	0	0.0406	0	0	0.0095	0.0522	0.0238	0	0	0	0.0271		0.0324	0.0165
MMP23B	202	RI	3.4	3.3	3.5	0	0.9407	1	0.1341	0.352	0.0647	0.0675	0.3356	0.2268	0.0891	0.1389	0.2315			0.201	0.1328	0.1312	0.1033	0.0659		0.0738	0.1054	0.2463	0.2748	0.0091	0.084	0.1678	0.1325	0.1733	0.1426	0.0498	0.2422	0.0129	0.0743	0.2804	0.1781	0.1781	0.0391	0.5946	0.0906	0.1964	0.2268	0.1065	0.1012
MMP23B	203	RI	3.2	3.1	3.3	0	0.8778	0.5317	0.0648	0.0674	0.088	0.0674	0.0761	0.0704	0.0491	0.2035	0.102	0.2541	0.2541	0.1851	0.1382	0.112	0.0951			0.1591	0.1396	0.1085	0.0663	0.2541		0.1591	0.1396	0.1537	0.1108	0.102	0.1093	0.1591	0.1957	0.1792	0.0663	0.102	0.0899	0	0.05	0.182		0.0564	0.093
CDK11B	204	AP	1			0	1	0.2228	0.0295	0.9594	0.9658	0.9638	0.9899	0.9692	0.9762	0.9667	0.9874	1	0.9023	0.9895	0.9736	0.9608	0.9724	0.9652	1	0.9302	0.9656	0.9828	0.9728	0.9823	0.9222	1	0.9639	0.9766	0.9579	0.9756	0.9576	0.8872	0.939	1	1	0.9495	0.9716	0.9837	0.9489	0.8956	1	0.9285	0.9726
CDK11B	205	AP	2			0	1	0.2228	0.0295	0.0406	0.0342	0.0362	0.0101	0.0308	0.0238	0.0333	0.0126	0	0.0977	0.0105	0.0264	0.0392	0.0276	0.0348	0	0.0698	0.0344	0.0172	0.0272	0.0177	0.0778	0	0.0361	0.0234	0.0421	0.0244	0.0424	0.1128	0.061	0	0	0.0505	0.0284	0.0163	0.0511	0.1044	0	0.0715	0.0274
SLC35E2B	207	ES	2	1	3	0	0.9895	0.8519	0.1621	0.4615	0.4541	0.5001	0.5609	0.5446	0.1977	0.1687	0.3871	0.3503	0.5241	0.2535	0.3575	0.1947	0.4843	0.4889	0.4326	0.682	0.566	0.4981	0.6595	0.549	0.6625	0.4677	0.3727	0.5188	0.7454	0.696	0.4909	0.7089	0.6567	0.4103	0.4188	0.3077	0.4831	0.5365	0.5695	0.64	0.6462	0.6446	0.6302
CDK11A	208	AP	1			0	0.9721	0	0	1	1	1	1	1	1	1	1	1	1	1	1	1	1	1	1	1	1	1	1	1	1	1	1	1	1	1	1		1	1		1	1	1			1	1	1
CDK11A	210	AP	2.1			0	0.9721	0	0	0	0	0	0	0	0	0	0	0	0	0	0	0	0	0	0	0	0	0	0	0	0	0	0	0	0	0	0		0	0		0	0	0			0	0	0
CDK11A	211	AT	12.2			0	1	0	0	0	0	0	0	0	0	0	0	0	0	0	0	0	0	0	0	0	0	0	0	0	0	0	0	0	0	0	0	0	0	0	0	0	0	0	0	0	0	0	0
CDK11A	212	AT	20			0	1	0	0	1	1	1	1	1	1	1	1	1	1	1	1	1	1	1	1	1	1	1	1	1	1	1	1	1	1	1	1	1	1	1	1	1	1	1	1	1	1	1	1
CDK11A	213	AD	11.2	11.1	12.1	0	0.9913	0.5817	0.0716	0.9105	0.8921	0.9377	0.9318	0.8809	0.9415	0.9565	0.9773	0.7824	0.7896	0.9224	0.9506	0.9425	0.9425	0.9738	0.9481	0.8579	0.9068	0.884	0.8806	0.9799	0.9027	0.8886	0.8886	0.9806	0.9377	0.9773	0.9055	0.789	0.9304	0.9162	0.8436	0.883	1	0.9408	1	0.8762	0.9181	0.8955	1
CDK11A	214	AD	7.2	7.1	8	0	0.9581	0.7148	0.1011	0.3959	0.3101	0.345	0.1663	0.237	0.2201	0.217	0.2129	0.342	0.2643	0.2602	0.1721	0.1686	0.316	0.3566	0.1261	0.2573	0.1058	0.1601	0.339	0.3311	0.3525	0.342	0.0327	0.3007	0.316	0.3991	0.2029			0.2459		0.2878	0.1477	0.2489	0.3189	0.3341	0.0901	0.1693	0.5047
CDK11A	216	ES	6.2	5	7.1	0	0.993	0.3105	0.0336	0.9894	1	0.9889	0.9803	0.9888	0.9602	0.967	0.9742	0.9445	0.9846	0.962	0.9663	0.9931	1	1	0.9861	0.9707	0.9772	0.9852	0.9775	1	0.9779	0.9848	0.9845	1	0.9769	0.94	0.9842	1	1	0.9839	1	0.9804	1	0.9898	0.9449	0.9486	0.9354	0.9539	0.9751
CDK11A	217	AA	6.1	5	6.2	0	0.9895	0.1737	0.0179	0.0139	0.0229	0.03	0.0234	0.0154	0.0369	0	0.024	0	0.0309	0.0298	0.02	0.0083	0.0223	0	0.021	0.0234	0.0104	0.0213	0.0208	0.0291	0.0363	0.0052	0.0215	0.0216	0.0277	0.0067	0	0	0	0.0237	0	0.0257	0	0	0.0159	0.0283	0	0.0051	0.0079
CDK11A	218	AD	4.2	4.1	5	0	0.9913	0.6909	0.0995	0.5416	0.4814	0.7016	0.5919	0.638	0.6682	0.6351	0.528	0.6911	0.8791	0.5789	0.6714	0.6911	0.5454	0.4923	0.608	0.3969	0.5208	0.5203	0.5531	0.6279	0.6911	0.6509	0.5606	0.5479	0.7505	0.544	0.5211	0.8703		0.7489	0.528	0.57	0.8173	0.583	0.6441	0.468	0.5108	0.6203	0.7261
CDK11A	220	AD	2.3:2.4	2.2	3	0	0.9878	0.4179	0.0612	0.0476	0.0675	0.0216	0.0745	0.0396	0.0248	0.0306	0.0122	0	0.197	0.1045	0.0283	0.0507	0	0.057	0.0332	0.0323	0.0617	0.0757	0.0942	0.02	0.0509	0.0721	0.0231	0.0494	0.0485	0.0573	0.0206	0.148	0.1413	0.0351		0.0672	0.0957	0.0406	0.1178	0.0838	0	0.0773	0.1159
CDK11A	221	ES	2.4	2.2	3	0	0.9965	0.5093	0.0999	0.203	0.2677	0.1263	0.0302	0.1775	0.2019	0.1027	0.2518	0.2068	0.2622	0.0961	0.183	0.1584	0.133	0.1035	0.0615	0.0489	0.1252	0.2387	0.2214	0.2447	0.3154	0.1149	0.0687	0.2583	0.2866	0.2501	0.2178	0.1431	0.2022	0.287	0.3029	0.2836	0	0.1459	0	0.3431	0.1509	0.3026	0.3103
SLC35E2	222	AT	8			0	1	0.8176	0.1584	0.3862	0.3888	0.4925	0.2992	0.3205	0.4464	0.5511	0.6139	0.2285	0.6016	0.5713	0.5397	0.7104	0.41	0.3474	0.3725	0.641	0.4156	0.6695	0.2949	0.3945	0.3357	0.3524	0.4243	0.6255	0.4962	0.6086	0.3847	0.4225	0.5877	0.4795	0.5225	0.4422	0.4635	0.3645	0.9161	0.897	0.746	0.6518	0.8312
SLC35E2	223	AT	7			0	1	0.8176	0.1584	0.6138	0.6112	0.5075	0.7008	0.6795	0.5536	0.4489	0.3861	0.7715	0.3984	0.4287	0.4603	0.2896	0.59	0.6526	0.6275	0.359	0.5844	0.3305	0.7051	0.6055	0.6643	0.6476	0.5757	0.3745	0.5038	0.3914	0.6153	0.5775	0.4123	0.5205	0.4775	0.5578	0.5365	0.6355	0.0839	0.103	0.254	0.3482	0.1688
SLC35E2	224	ES	2	1	3	0	0.7818	0.9452	0.2519	0.6649	0.8243	1	0.8392	0.5369	0.1481	0.549	0.1727	0.448	0.309	0.2767	0.5241		0.3168	0.3611	0.4889		0.7089	0.3965	0.8516	0.7579	1	0.8477	0.7473	0.3235	0.6477	1	0.5741			1				0.7356	1	0.684		1	0.6567
NADK	225	AP	3			0	0.9983	0.7244	0.1356	0.3621	0.3562	0.3489	0.1836	0.2201	0.2989	0.6627	0.2174	0.1427	0.2796	0.3304	0.3265	0.1626	0.3724	0.2381	0.3149	0.3771	0.1215	0.2858	0.1748	0.2711	0.2017	0.4881	0.5782	0.4247	0.327	0.1541	0.1709	0.1094	0.2794	0.3029	0.6389	0.1871	0.1828	0.3677	0.3992	0.4783	0.369	0.2832	0.3351
NADK	226	AP	8			0	0.9983	0.8202	0.1306	0.2002	0.1692	0.0884	0.2219	0.4516	0.1994	0.016	0.0701	0.4051	0.2205	0.1928	0.1438	0.1307	0.1452	0.0619	0.2561	0.1471	0.4423	0.2068	0.4952	0.0775	0.068	0.1685	0.1052	0.0807	0.2846	0.0552	0.1228	0.0384	0.0808	0.0515	0.0679	0.1926	0.2567	0.1942	0.0085	0.0354	0.0324	0.0324	0.1251
NADK	227	AP	2			0	0.9983	0.3594	0.0484	0.0324	0.0223	0.035	0.0173	0.0215	0.0249	0	0.0199	0.1647	0.0195	0.0706	0.0265	0.0217	0.035	0.0896	0.0127	0	0.0686	0.0223	0.0242	0	0.041	0.0406	0.0272	0.0449	0.0443	0.025	0.0529	0	0	0.0699	0	0	0.0464	0.1004	0.0303	0.042	0	0.1004	0
NADK	228	AP	1			0	0.9983	0.8693	0.1639	0.4053	0.4523	0.5278	0.5772	0.3067	0.4768	0.3212	0.6926	0.2875	0.4805	0.4061	0.5033	0.685	0.4474	0.6104	0.4162	0.4758	0.3675	0.485	0.3058	0.6514	0.6893	0.3028	0.2894	0.4497	0.3442	0.7657	0.6534	0.8521	0.6398	0.5757	0.2931	0.6204	0.5141	0.3377	0.562	0.4443	0.5986	0.584	0.5397
NADK	229	ES	9.2:10.1	9.1	10.2	0	0.9983	0.3776	0.053	0.0445	0.0249	0.005	0.061	0.0249	0.0318	0.0211	0.0205	0.0632	0.0371	0.0706	0.0228	0.0068	0.0698	0.0268	0.0195	0.0149	0.0736	0.0424	0.093	0.0066	0.028	0.0066	0.0663	0.0134	0.0268	0.0243	0.0588	0.065	0.0167	0.0333	0.054	0.0135	0.0127	0.0418	0.005	0.0277	0.0903	0.0325	0.0118
NADK	230	ES	06:07:00	5	9.1	0	0.9965	0.1843	0.0175	0.0254	0.0087	0.0078	0.0112	0.0052	0.0031	0.0021	0.0014	0.0073	0.001	0.0172	0.0024	0	0.0083	0.0144	0	0	0.0022	0	0.0118	0	0.0022	0.0047	0.0308	0.007	0.0022	0.0068	0.0027	0	0	0	0.0028	0.0046	0.0016	0.0088	0	0.0008	0	0.0068	0.0008
GNB1	231	ES	2	1	3	1	0.9686	0.1534	0.0238	0.8955	0.9379	0.8965	0.9355	0.9262	0.927	0.8822	0.9139	0.9327	0.9044	0.9121	0.8995	0.9284	0.9161	0.9092	0.917	0.92	0.9639	0.874	0.9195	0.9426	0.9215	0.9194	0.8378	0.9252	0.8977	0.9487	0.9368	0.9231	0.9675	0.9038	0.9393	0.9278	0.9057	0.9355	0.8777	0.9474	0.8852	0.9411	0.9477
PRKCZ	235	AP	8			0	0.9686	0.8628	0.1911	0	0	0	0.417	0.6347	0.3934	0	0.0604	0.31	0.206	0.0156	0.0722	0	0.088	0	0	0.7655	0.5374	0.2498	0.5609	0.1803	0	0.0096	0.0331	0	0.5358	0.0344	0.1577		0	0.3085	0.1548	0	0.2397	0.3933	0	0	0	0.0422	0.2161
PRKCZ	236	AP	6			0	0.9686	0.2112	0.0207	0	0.0244	0	0	0.0098	0	0	0	0	0	0.0105	0	0	0.0148	0	0	0	0	0	0.0017	0	0	0	0	0	0.0205	0	0		0	0	0	0	0	0.004	0	0	0	0	0
PRKCZ	237	AP	7			0	0.9686	0.5976	0.0544	0.0594	0	0	0.0085	0.0064	0.0104	0	0	0	0	0	0	0	0	0	0	0	0.0109	0	0.0023	0	0	0	0	0	0	0	0		0	0.0149	0	0	0	0.0026	0	0	0	0	0.0086
PRKCZ	238	AP	11			0	0.9686	0.3731	0.0687	0	0	0.0646	0	0.029	0.0158	0	0.02	0.0242	0	0.1243	0	0.0198	0.0292	0.1116	0	0.0624	0.0663	0	0.1003	0.0217	0	0.0507	0	0.0299	0.0355	0.0455	0.1254		0.1198	0.0227	0.041	0	0.0794	0.0745	0	0.0674	0	0	0.026
PRKCZ	239	AP	5			0	0.9686	0.2554	0.0282	0	0.0319	0.0215	0	0.0064	0	0	0	0	0	0	0	0	0.0289	0	0	0	0	0.026	0.0046	0	0	0	0	0	0.0385	0	0		0	0	0	0	0	0.0026	0	0	0	0	0
PRKCZ	240	AP	1			0	0.9686	1	0.2159	0.9406	0.9437	0.9139	0.5745	0.3138	0.5805	1	0.9195	0.6659	0.794	0.8496	0.9278	0.9802	0.8392	0.8884	1	0.172	0.3854	0.7241	0.3303	0.798	1	0.9397	0.9669	0.9701	0.3696	0.9201	0.7168		0.8802	0.6538	0.8041	1	0.6809	0.5231	1	0.9326	1	0.9578	0.7493
PRKCZ	243	ES	22	21	23	0	0.9948	0.2507	0.0248	0.0228	0.0156	0.004	0.028	0.0193	0.0101	0.01	0.0115	0.0355	0.0591	0.0221	0.0144	0	0.0287	0	0	0.0241	0.0041	0.0192	0.0192	0.0035	0.0095	0.0193	0.0187	0	0.0159	0.0325	0.0283	0	0	0.0068	0.006	0	0	0.0213	0	0	0	0.0089	0.0083
C1orf86	244	AP	1			0	0.9791	0.8688	0.0967	0.417	0.3709	0.1178	0.1103	0.1113	0.0351	0.0675	0.0633	0.0558	0.0747	0.0636	0.1839	0.112	0.0578	0.0474	0.0523	0.2128	0.0256	0.0507	0.0482	0.1545	0.2921	0.0746	0.0379	0.0946	0.0449	0.1136	0.4112	0.0707	0.0827	0.0523	0.0452	0.1417	0.0847	0.2696	0.3801	0.2482	0	0.1458	0.0026
C1orf86	245	AP	3			0	0.9791	0.8688	0.0967	0.583	0.6291	0.8822	0.8897	0.8887	0.9649	0.9325	0.9367	0.9442	0.9253	0.9364	0.8161	0.888	0.9422	0.9526	0.9477	0.7872	0.9744	0.9493	0.9518	0.8455	0.7079	0.9254	0.9621	0.9054	0.9551	0.8864	0.5888	0.9293	0.9173	0.9477	0.9548	0.8583	0.9153	0.7304	0.6199	0.7518	1	0.8542	0.9974
C1orf86	246	AT	7.2			0	1	0.6293	0.084	0.5812	0.634	0.5425	0.6115	0.5825	0.6883	0.7274	0.6968	0.5305	0.7262	0.6368	0.5649	0.6557	0.5884	0.6345	0.6984	0.5728	0.691	0.5954	0.5162	0.5908	0.6522	0.5126	0.6164	0.539	0.5813	0.6644	0.4712	0.7952	0.6817	0.6122	0.7277	0.6814	0.6974	0.5521	0.6769	0.5301	0.7235	0.6609	0.5494
C1orf86	247	AT	10			0	1	0.6293	0.084	0.4188	0.366	0.4575	0.3885	0.4175	0.3117	0.2726	0.3032	0.4695	0.2738	0.3632	0.4351	0.3443	0.4116	0.3655	0.3016	0.4272	0.309	0.4046	0.4838	0.4092	0.3478	0.4874	0.3836	0.461	0.4187	0.3356	0.5288	0.2048	0.3183	0.3878	0.2723	0.3186	0.3026	0.4479	0.3231	0.4699	0.2765	0.3391	0.4505
C1orf86	248	ES	6:7.1:8:9	5	10	0	0.9232	1	0.159	0.0531	0.1478	0.1045	0.0333	0.2078	0.093	0.0287	0.0041	0.1138	0.0379	0.0374	0.0813	0.1267	0.243	0.5519	0.0146	0.1762	0.1104	0	0.1101		0.1051	0.0868	0.0963	0.0456	0.0809	0.0107	0.1369	0.0376		0.0411	0.0585		0.0872	0.4347	0.0152	0.0233		0.1102	0.1246
C1orf86	249	ES	7.1:8:9	5	10	0	0.9337	1	0.1842	0.0635	0.2011	0.12	0.1343	0.2359	0.1202	0.0354	0.0207	0.1519	0.1342	0.1301	0.1728	0.1469	0.2777	0.6124	0.1706	0.2324	0.1464	0	0.1267		0.1394	0.2318	0.3031	0.1342	0.0941	0.0125	0.1836	0.0494		0.0487	0.0688		0.1132	0.4741	0.0902	0.0282		0.2597	0.1681
C1orf86	250	ES	6	5	7.1	0	0.9983	0.6399	0.0961	0.5435	0.3059	0.323	0.223	0.3103	0.3563	0.2287	0.2183	0.2007	0.2642	0.2897	0.3681	0.3828	0.2567	0.2803	0.0922	0.1673	0.2671	0.2284	0.2929	0.2448	0.3421	0.3153	0.2488	0.2763	0.1948	0.3431	0.5055	0.3888	0.4979	0.3234	0.2325	0.4652	0.2624	0.4932	0.1911	0.3845	0.2028	0.3266	0.2616
C1orf86	251	ES	4	3	5	0	0.993	0.1164	0.0191	1	0.9802	0.9791	0.9847	0.9597	0.9578	0.9901	0.9735	0.9024	0.9668	0.9731	0.9805	0.9915	1	0.9849	0.9874	0.9629	0.9853	0.9859	0.9674	0.9765	0.9634	0.9764	0.986	0.9593	0.9478	0.9819	0.9839	0.9918	0.977	0.9809	0.9908	0.9639	0.9865	0.9983	0.9916	0.9902	0.964	0.9936	0.9718
MORN1	252	AT	8			0	0.9616	1	0.2113	0.1726	0.3333	0.207	0.3835	0.5635	0.5119		0.3256	0.5343	0.173	0.4545	0.6644	0.3715	0.3551	0.7304	0.4383	0.0783	0.076	0.4768	0.6238	0.2437	0.1696	0.1558	0.5698	0.4534	0.2109	0.6047	0.147		0.229	0.2676		0.2501		0.5539	0.1023	0.1651	0.0299	0.0595	0.1039
MORN1	253	AT	17			0	0.9616	1	0.2296	0.5943	0.4114	0.4315	0.4297	0.4365	0.0892		0.5089	0.4657	0.6293	0.1894	0.27	0.5298	0.2857	0.1273	0.3056	0.9217	0.6462	0.3966	0.1911	0.1738	0.6652	0.733	0.2032	0.4881	0.6248	0.3953	0.7539		0.3992	0.4197		0.4577		0.2213	0.5999	0.2582	0.9119	0.8661	0.7353
MORN1	254	AT	13			0	0.9616	0.8222	0.1316	0.2332	0.2553	0.3615	0.1868	0	0.3988		0.1654	0	0.1978	0.356	0.0656	0.0987	0.3592	0.1423	0.2561	0	0.2777	0.1266	0.1851	0.5825	0.1652	0.1112	0.227	0.0584	0.1643	0	0.0991		0.3718	0.3127		0.2923		0.2248	0.2978	0.5767	0.0582	0.0744	0.1608
MORN1	255	ES	2	1	3	0	0.7504	0.5319	0.1061	0.9142		0.797	0.7938	0.9034	1		0.9628	1	0.8148	0.8462	0.8826	0.8319	1	0.8582	1		1	0.8851	0.9226			0.5833	1	0.8773	0.8582	0.8684	1		0.7938			0.8148		0.8919	0.8794	0.8347		0.8851	0.7938
RER1	256	AP	1			0	1	0.8694	0.1126	0.7327	0.9221	0.9755	0.9037	0.8208	0.9645	0.9656	0.9815	0.9136	0.9731	0.9363	0.9555	0.9932	0.9017	0.908	0.9312	0.9603	0.965	0.9666	0.8849	0.9568	0.9792	0.9332	0.8318	0.9663	0.9528	0.9155	0.8655	0.9871	0.9842	0.9829	0.9921	0.9914	0.9827	0.9099	0.9984	0.9831	0.9925	0.9706	0.976
RER1	257	AP	2.1			0	1	0.8694	0.1126	0.2673	0.0779	0.0245	0.0963	0.1792	0.0355	0.0344	0.0185	0.0864	0.0269	0.0637	0.0445	0.0068	0.0983	0.092	0.0688	0.0397	0.035	0.0334	0.1151	0.0432	0.0208	0.0668	0.1682	0.0337	0.0472	0.0845	0.1345	0.0129	0.0158	0.0171	0.0079	0.0086	0.0173	0.0901	0.0016	0.0169	0.0075	0.0294	0.024
RER1	260	AA	6.1	5	6.2	0	1	0.1041	0.0164	0.0309	0.0323	0.0175	0.0412	0.0469	0.0284	0.0331	0.0296	0.046	0.0381	0.0552	0.0303	0.0271	0.059	0.0315	0.0281	0.0325	0.0278	0.0315	0.0335	0.0297	0.0329	0.0254	0.0599	0.0225	0.0269	0.0289	0.0253	0.0225	0.0129	0.02	0.0145	0.01	0.0253	0.028	0.0104	0.0112	0.0183	0.0292	0.0169
RER1	261	ES	4	3	5	0	1	0.0349	0.0055	0.997	0.9917	0.9944	0.9992	0.9927	0.9879	0.9923	0.9991	0.9942	0.9944	0.9932	0.999	0.9957	0.9908	0.9866	0.9983	0.997	0.9924	0.9967	0.993	1	0.9969	0.9936	0.9914	0.9948	0.9994	0.9979	0.9965	0.9984	0.9973	0.9955	0.9897	0.9914	0.9959	0.9943	0.9934	0.9823	0.9966	0.993	0.9975
PEX10	265	AA	7.1	6	7.2	0	0.9773	0.0323	0.0017	1	1	1	1	1	1	1	1	1	1	1	1	1	1	1	1	1	1	1	1	1	1	1	1	1	1	1	1	1	1	1	1	1	1	1	1	1	1	1	1
PEX10	266	AA	5.1	4.2	5.2	0	0.9808	0.4118	0.0535	0.1439	0.0424	0.088	0.0976	0.1196	0.1086	0.0381	0.1294	0.0869	0.0472	0.063	0.123	0.0706	0.1151	0.1264	0.0692	0.1026	0.1142	0.0707	0.0534	0.1245	0.0561	0.1175	0.1151	0.0981	0.1328	0.0672	0.0657	0.2449	0.0275	0.0902	0.0358	0.0427	0.0437	0.0697	0.0743	0.108	0.1707	0.0536	0.0152
PEX10	268	AD	4.2	4.1	5.2	0	0.9825	0.3092	0.0377	0.964	0.9758	0.9466	0.9866	0.9198	0.9753	0.9791	0.98	0.9626	0.969	0.9663	0.9893	0.9789	0.971	0.9745	0.9487	0.9627	0.9541	0.8916	0.944	0.9782	0.9763	0.9778	0.9421	0.9656	0.9538	0.9702	0.9677	1	0.9768	1	0.9387	1	0.9256	0.9493	0.9565	0.9031	0.9663	0.9763	0.9745
PEX10	269	ES	2	1	3	0	0.8377	1	0.1507	0.5047		0.1563	0.0313	0.0585	0.0069	0.0733	0.0036	0.037	0.0661	0.0814	0.0131	0.0383	0.1186	0.0189	0.1186	0.063	0.0475	0.1722	0.1293	0.014	0.0189	0.0429	0.4178	0.0239	0.0325	0.0429	0.301		0	0.0346	0.0511		0	0.0943	0.1563	0.122		0.1131	0
PLCH2	272	AT	23.2			0	0.9738	0.7739	0.1484	0.4944	0.7605	0.5978	0.5753	0.6425	0.8599	0.3285	0.743	1	0.5768	0.6915	0.7693	0.6039	0.7014	0.7123	0.6513	0.5716	0.7827	0.7215	0.6308	1	0.6705	0.6819	0.4001	0.7762	0.8102	0.4829	0.6744	0.4232	1	0.5285	0.874	0.7138	1	0.5873	0.7901	0.8114	1	0.706	0.8501
PLCH2	273	AT	22.3			0	0.9738	0.7739	0.1484	0.5056	0.2395	0.4022	0.4247	0.3575	0.1401	0.6715	0.257	0	0.4232	0.3085	0.2307	0.3961	0.2986	0.2877	0.3487	0.4284	0.2173	0.2785	0.3692	0	0.3295	0.318	0.5999	0.2238	0.1898	0.5171	0.3256	0.5768	0	0.4715	0.126	0.2862	0	0.4127	0.2099	0.1886	0	0.294	0.1499
PLCH2	276	ES	4.2:5.1:5.2:6:7:8:9:10:11:12:13:14:15:16:17:18	4.1	19	0	0.8656	0.0273	0.0012	1	1	1	1	1			1	1	1	1	1	1	1	1	1	1	1	1	1	1	1	1	1		1	1	1		1	1	1	1	1	1	1	1		1	1
PANK4	282	ES	2.5:3.1	2.4	3.2	0	1	0.0546	0.0092	1	1	1	1	0.977	1	1	0.9837	1	1	1	0.9922	1	1	1	1	1	1	0.9925	1	0.9777	1	1	1	1	1	0.9654	1	1	1	1	1	1	1	1	0.9786	0.9817	1	1	1
PANK4	283	RI	2.3	2.2	2.4	0	0.9895	0.4689	0.0395	0.0584	0.0128	0.0069	0.0154	0.0531	0.0022	0.0565	0	0.0136	0.0102	0.0329	0.0008	0.0029	0.0305	0.0089	0	0.0089	0	0.0034	0.0117	0.0048	0	0.0095	0.0176	0.0132	0.0025	0.0066	0.0082	0.0176	0	0.0064	0.0071	0	0	0.0149	0	0.0057		0.0196	0.002
PANK4	284	AA	2.1	1	2.2	0	0.8656	0.1874	0.0135	0	0	0	0	0	0	0	0.0053	0.052	0	0	0	0		0	0	0	0	0	0	0	0	0	0	0.0112	0	0	0	0	0	0	0	0	0	0	0	0		0	0
TNFRSF14	285	AP	1			0	0.9965	0.1916	0.0192	0.0097	0.0263	0.029	0.0053	0.0201	0.0167	0	0.0197	0	0.0609	0.0134	0.0138	0.0039	0.0386	0	0.1222	0.0795	0	0	0.0082	0.0248	0.0221	0	0.0119	0.0167	0	0	0.0089	0.0771	0	0.0123	0	0.0057	0.0102	0.0088	0.0663	0	0	0	0
TNFRSF14	286	AP	2.1			0	0.9965	0.1916	0.0192	0.9903	0.9737	0.971	0.9947	0.9799	0.9833	1	0.9803	1	0.9391	0.9866	0.9862	0.9961	0.9614	1	0.8778	0.9205	1	1	0.9918	0.9752	0.9779	1	0.9881	0.9833	1	1	0.9911	0.9229	1	0.9877	1	0.9943	0.9898	0.9912	0.9337	1	1	1	1
TNFRSF14	289	AA	7.1	6	7.2	0	0.9983	0.6281	0.1039	0.2711	0.1519	0.0546	0.2824	0.2955	0.0798	0.196	0.082	0.2316	0.0871	0.2445	0.1329	0.0515	0.1306	0.1349	0.1606	0.0897	0.186	0.1699	0.2784	0.2087	0.0953	0.1231	0.133	0.0594	0.1353	0.1251	0.2034	0.07	0.1901	0.1072	0.1558	0.0921	0.0247	0.1228	0.0369	0.0782	0.0714	0.1176	0.0816
FAM213B	290	AA	6.1	5	6.2	0	0.9773	0.6584	0.0854	0.5622	0.5903	0.6014	0.7249	0.5707	0.5704	0.5766	0.717	0.7739	0.6206	0.6739	0.609	0.7007	0.6701	0.4876	0.7458	0.5038	0.6235	0.6385	0.5535	0.6121	0.5833	0.6318	0.667	0.5566	0.5709	0.7294	0.6353	0.4681	0.5647	0.6189	0.5281	0.5789	0.5385	0.639	0.6087	0.5445	0.7097	0.5443	0.6368
FAM213B	291	ES	5:6.1:6.2	4.2	6.3	0	0.9808	0.0791	0.0061	1	0.9881	1	1	1	1	1	1	1	1	1	1	1	1	1	1	1	1	1	1	0.9855	1	1	1	1	1	1	1	1	1	1	1	1	1	1	1	1	1	1	1
FAM213B	292	ES	00:05:06.200000	4.2	6.3	0	0.9703	0.1641	0.0107	1	0.9861	1	1	1	1	1	1	1	1	1	1	1	1	1	1	1	1	1	1	0.9816	1	1	1	1	1	1	1	1	1	1	1	1	1	1	1	1	1	1	1
FAM213B	293	AA	4.1	3	4.2	0	0.9686	0.3314	0.0388	0.0826	0.0494	0.0321	0.0397	0.0796	0.1341	0.0533	0.0301	0.0491	0.0226	0.0769	0.0584	0.0403	0.0333	0.099	0	0	0.0097	0.022	0.0543	0.028	0.0328	0.0283	0.0626	0.0446	0.0267	0.0521	0.0658	0.0763	0.0149	0.0362	0.0397	0.0383	0.0287	0.0925	0.0224	0.0775	0.0644	0.0476	0.057
ARHGEF16	307	AP	1			0	0.7993	1	0.2176	0.1943	0.2953	0.4961	0.4023	0.5494	1	0.5956	0.4539	0.329	0.5727	0.4556	0.2998	0.6343	0.5426	0.5285			0.3198	0.8043	0.3366		0.6251	0.3217	0.4904	0.786	0.8275	0.3294	0.3164			0.6628	1	0.5047	0.662	0.1752		0.7538
ARHGEF16	308	AP	4.1			0	0.7993	0.8345	0.1631	0.3023	0.5775	0.5039	0.3589	0.3268	0	0.1181	0.1458	0.4144	0.2725	0.2072	0.2431	0.1223	0.2946	0.4715			0.2919	0.1957	0.4835		0.1312	0.3753	0.1875	0.1002	0.1074	0.3265	0.2258			0.215	0	0.193	0.1477	0.3647		0
ARHGEF16	309	AP	3.1			0	0.7993	0.9539	0.1167	0.1111	0.0675	0	0.1028	0	0	0.1522	0.2714	0.178	0	0.2465	0.1253	0	0.1627	0			0.2223	0	0.1133		0.1691	0.2276	0.3222	0	0.0346	0.0842	0.0728			0	0	0.0829	0.1903	0.1343		0.2462
ARHGEF16	310	AP	7			0	0.7993	0.6698	0.1408	0.3923	0.0596	0	0.136	0.1238	0	0.1342	0.1289	0.0785	0.1549	0.0906	0.3317	0.2434	0	0			0.1659	0	0.0666		0.0746	0.0753	0	0.1139	0.0305	0.2599	0.385			0.1222	0	0.2194	0	0.3258		0
MEGF6	311	AP	1			0	0.8726	0.953	0.2376	0.2269	0.6313	0.0684	0.0326	0.1078	0.1138	0.3394	0.5484		0.0302	0.2426	0.128	0.2167	0.3624	0.5605	0.0533		0.0083	0	0.0732	0.054	0.613	0.1574	0.391	0.5622	0.1241	0.2959	0.0961		0.774	0.2551	0.5067	0	0.1396	0.041		0.0789		0.3394	0.4956
MEGF6	312	AP	6			0	0.8726	0.953	0.2376	0.7731	0.3687	0.9316	0.9674	0.8922	0.8862	0.6606	0.4516		0.9698	0.7574	0.872	0.7833	0.6376	0.4395	0.9467		0.9917	1	0.9268	0.946	0.387	0.8426	0.609	0.4378	0.8759	0.7041	0.9039		0.226	0.7449	0.4933	1	0.8604	0.9589		0.9211		0.6606	0.5044
MEGF6	313	ES	39	38	40	0	0.9808	0.0294	0.0021	1	1	1	1	1	1	1	1	1	1	1	1	1	1	1	1	1	1	1	1	1	1	1	1	1	1	1	1	1	1	1	1	1	1	1	1	1	1	1	1
MEGF6	314	ES	00:36:37.100000	35	37.2	0	0.9913	0.1602	0.0089	1	1	1	1	1	1	1	1	1	0.9858	1	1	1	1	1	1	1	1	1	1	0.9749	1	1	1	0.9922	1	1	1	1	1	0.9737	1	0.9756	1	1	1	0.9743	1	1	1
MEGF6	315	ES	31	30	32	0	0.9616	0.8824	0.1676	0.6216	0.824	0.8188	0.6172	0.4915	0.6154	0.5455	0.359	0.5833	0.4371	0.4904	0.6575	0.8249	0.8071	0.6188	0.4762	0.5455	0.5409	0.6875	0.5963	0.7573	0.7692	0.7024	0.6821	0.5238	0.6154	0.9444	0.823		0.6951	0.7967	0.8571	0.7788	0.6377	0.7581	0.7549	0.545	0.5833	0.7368	0.9642
MEGF6	317	ES	1 day, 2:27:00	25	28	0	0.9703	0.3769	0.0546	0.9301	0.9744	1	0.9214	0.8575	1	1	0.8625	1	1	0.9595	0.9735	1	1	0.8643	0.7066	0.9144	0.9918	1	1	1	0.9811	1	0.9583	0.9616	0.8163	1	1	1	1	1	1	0.9447	1	1	1	1	1	1	0.981
TPRG1L	319	ES	3	2	4	0	1	0.0463	0.0047	1	1	1	0.9964	0.9934	0.9945	1	1	0.9882	1	0.9965	0.9962	0.9977	1	0.9865	1	1	1	0.9949	1	1	1	0.9963	1	0.9961	0.9968	1	0.9956	1	1	1	1	1	0.987	1	1	0.9921	1	1	0.9969
WRAP73	320	RI	11.2	11.1	11.3	0	0.9965	0.8862	0.1205	0.4464	0.3568	0.6158	0.4633	0.2309	0.4946	0.3704	0.2646	0.1745	0.2497	0.3873	0.4148	0.2768	0.5647	0.441	0.2509	0.255	0.198	0.4064	0.3932	0.5023	0.2712	0.3269	0.3329	0.5067	0.5453	0.3234	0.2962	0.4738	0.2994	0.3542	0.4877	0.2929	0.2937	0.215	0.5456	0.289	0.358	0.252	0.3252
TP73	327	ES	13:14:15	12	16	0	0.8185	0.147	0.0091	1	1	1	1	1	1		1	1	1	1	1	1	1	1	1	1	1		1	1	1	1	1	1	1	1	1			1		1	1	1		1	1	1	1
TP73	332	ES	13	12	14	0	0.7871	0.3659	0.0504	1	1	1	1	1	1		1	1	1	1	1	1	1	0.8387	1		1		1	1	1	0.9143	0.9123	1	0.8863	1	0.9596			1		1	1	0.7481		1	1	1	1
TP73	333	ES	13:14:00	12	15	0	0.7784	0.056	0.0026	1	1	1	1	1	1		1	1	1	1	1	1	1	1	1		1		1	1	1	1	1	1	1	1	1			1		1	1	1		1	1	1	1
SMIM1	337	AT	3.2			0	0.9721	0.3343	0.0478	0.0407	0.0582	0.0913	0.0108	0.0579	0.0398	0	0.0106	0.0304	0.1033	0.0279	0.0466	0.0469	0.0817	0.082	0.0543	0.1309	0.1288	0.0595	0.0251	0.0548	0.1133	0.0068	0.1338	0.1014	0.1255	0.0717	0.1085	0	0.039	0.0837	0.0713	0.0772	0.0767	0.0139	0.0986	0.0331	0.0692	0.0882	0.0359
SMIM1	338	AT	4			0	0.9721	0.3343	0.0478	0.9593	0.9418	0.9087	0.9892	0.9421	0.9602	1	0.9894	0.9696	0.8967	0.9721	0.9534	0.9531	0.9183	0.918	0.9457	0.8691	0.8712	0.9405	0.9749	0.9452	0.8867	0.9932	0.8662	0.8986	0.8745	0.9283	0.8915	1	0.961	0.9163	0.9287	0.9228	0.9233	0.9861	0.9014	0.9669	0.9308	0.9118	0.9641
CEP104	339	AT	23			0	1	0.1472	0.016	0.9515	0.9698	0.9709	0.9959	1	0.9907	0.9697	0.9656	0.9892	0.9858	0.9818	0.993	1	1	1	1	1	0.9729	0.9929	0.9651	1	0.9806	0.9886	0.987	1	0.9926	0.9679	0.9648	1	1	1	1	0.9838	1	0.9933	1	0.988	1	1	1
CEP104	340	AT	7			0	1	0.1472	0.016	0.0485	0.0302	0.0291	0.0041	0	0.0093	0.0303	0.0344	0.0108	0.0142	0.0182	0.007	0	0	0	0	0	0.0271	0.0071	0.0349	0	0.0194	0.0114	0.013	0	0.0074	0.0321	0.0352	0	0	0	0	0.0162	0	0.0067	0	0.012	0	0	0
AJAP1	352	AT	6			0	0.8464	0.9582	0.3073	0	0.7171	0.8508	0.6124	0.7015	0.7834				0	0	0	0.6626	0.2979	0.6562		0.6424	0.8708	0	0	0	0	0		0	0.7179	0	0		0	0.8513		0	0					0.766	0.2606
AJAP1	353	AT	7			0	0.8464	0.9582	0.3073	1	0.2829	0.1492	0.3876	0.2985	0.2166				1	1	1	0.3374	0.7021	0.3438		0.3576	0.1292	1	1	1	1	1		1	0.2821	1	1		1	0.1487		1	1					0.234	0.7394
NPHP4	355	ES	20	19	21	0	0.7504	0.8313	0.0819	0.1338	0.0278	0.1082	0.0089	0		0	0.0264	0	0.1449	0.1262	0	0.0165	0	0.1581			0.0376	0.0324	0	0.0111	0.0725	0.0348	0.1389	0	0.0362	0.0285	0.0237					0.2197	0	0				0.0514	0
NPHP4	357	ES	00:13:14.100000	11	14.2	0	0.8115	0.2885	0.0397	1	1	1	1	1	1	1	1	0.8424	1	1	1		1	1	1	1	1	1		1	1	1	1	1	1	1	1						1	1				1	1
NPHP4	358	ES	12:13:00	11	14.2	0	0.815	0.3121	0.0395	1	1	1	1	1	1	1	1	0.8782	1	1	1	1	1	1	1		1	1	1	1	1	1	1	1	1	1	1			1				1		1		1	1
NPHP4	359	ES	7	6	8	0	0.9127	0.354	0.0458	1	1	1	1	0.8356	1	1	1	0.8867	1	1	1	1	1	1	1	1	1	0.9571	1	1	1	1	0.9072	1	1	1	1		1	1	1	1	1	1	1	1		1	1
KCNAB2	360	AP	2			0	0.9791	1	0.1326	0.0588	0.0966	0.0776	0.0393	0.1524	0.0652	0.1783	0.1991	0.526	0.0772	0.0776	0.0582	0.0396	0.154	0.0822	0.1132	0.022	0.1582	0.2904	0.0703	0.0436	0.123	0.1515	0.1845	0.0958	0.1056	0.0228	0.1049	0.131	0.0522	0.0293	0.186	0.1943	0.1029	0.1631	0.0303	0.0551	0.1532	0.2186	0.0601
KCNAB2	361	AP	3			0	0.9791	1	0.1543	0.8988	0.9034	0.9224	0.9351	0.8235	0.9235	0.8217	0.8009	0.2909	0.9214	0.9224	0.9249	0.9418	0.7908	0.864	0.8868	0.9442	0.8178	0.6422	0.9064	0.9195	0.8502	0.8187	0.7318	0.8875	0.8944	0.9772	0.8951	0.869	0.9478	0.9707	0.814	0.8057	0.8971	0.8222	0.9488	0.9449	0.8468	0.7814	0.925
KCNAB2	362	AP	7			0	0.9791	0.6514	0.0608	0.0064	0	0	0	0	0	0	0	0	0	0	0	0.0034	0.0168	0.0252	0	0.0337	0	0	0	0.0061	0	0	0	0	0	0	0	0	0	0	0	0	0	0.0147	0	0	0	0	0
KCNAB2	363	AP	4			0	0.9791	0.1198	0.013	0.0071	0	0	0.005	0	0.0022	0	0	0	0.0014	0	0	0	0	0	0	0	0	0	0	0.0033	0	0.0058	0	0	0	0	0	0	0	0	0	0	0	0	0	0	0	0	0
KCNAB2	364	AP	1			0	0.9791	0.383	0.0417	0.0289	0	0	0.0205	0.0241	0.0091	0	0	0.1831	0	0	0.0169	0.0153	0.0383	0.0286	0	0	0.024	0.0674	0.0233	0.0276	0.0268	0.024	0.0838	0.0167	0	0	0	0	0	0	0	0	0	0	0.0209	0	0	0	0.0149
KCNAB2	367	RI	22.2	22.1	22.3	0	0.993	1	0.1264	0.3527	0.0842	0.0343	0.1337	0.1379	0.0589	0.0675	0.063	0.1186	0.0625	0.1516	0.0855	0.007	0.175	0.2098	0.0143	0.0362	0.1265	0.2369	0.2086	0.0223	0.0489	0.0923	0.1446	0.0293	0.0502	0.0691	0.1528	0.0203	0.1141	0.0873	0.1785	0.0548	0.0301	0.0675	0	0.0754	0.0416	0.117	0.017
KCNAB2	368	ES	16	15	17	0	0.9232	0.1325	0.0172	0	0.0223	0	0.0054	0.0206	0.0122	0.0223	0	0	0.002	0	0.0106	0.0092	0	0.0155	0	0.0268	0	0	0.0391	0	0.0123	0.0109	0	0	0.0115	0.0098	0	0	0	0	0.0305		0	0	0.0243	0		0.0375	0.0045
KCNAB2	370	ES	13:14:15:17:18:19:21:22.1:22.2:22.3	12	22.4	0	0.8988	0.6559	0.0646	1	1	1	1	1	1	1	1	1	0.8507	1	1		1	1		1	1	1	1	1	1	1	1	1	1	1	1		1	1	1		1	1		1		1	1
KCNAB2	372	ES	13:14:15:17:18:19:21:22.1:22.3	12	22.4	0	1	0.0688	0.0043	1	1	1	1	1	1	1	1	1	0.9947	1	1	1	1	1	1	1	1	1	1	1	1	1	1	1	1	1	1	1	1	1	1	1	1	1	1	1	1	1	1
KCNAB2	374	ES	6	5	9	0	0.8656	0.9466	0.1196	0.111	0.4177	0.3031	0.3697	0.5359	0.4099		0.4037		0.4495	0.365	0.3463	0.4404	0.3757	0.4744	0.4744		0.3579	0.2758	0.372	0.3607	0.4037	0.3489	0.48	0.2005	0.3303	0.3148	0.4079	0.2131	0.4037	0.3672	0.4528		0.3191	0.4248	0.3879	0.3196		0.3237	0.3271
RPL22	377	AP	3.1			0	1	0	0	0	0	0	0	0	0	0	0	0	0	0	0	0	0	0	0	0	0	0	0	0	0	0	0	0	0	0	0	0	0	0	0	0	0	0	0	0	0	0	0
RPL22	378	AP	1			0	1	0.0527	0.0057	0.0191	0.0015	0.0008	0.0074	0.0137	0.0003	0.0007	0.005	0.0047	0.0012	0.0052	0.0018	0.0008	0.0022	0.0031	0.0023	0.0015	0.0016	0.0165	0.0099	0.0008	0.0101	0.0047	0.001	0.0041	0.0088	0.0024	0.0011	0.0031	0.0013	0.0006	0.0046	0.0019	0.0025	0.0019	0.001	0.0062	0.0006	0.0015	0.0003
RPL22	379	AP	2			0	1	0.0527	0.0057	0.9809	0.9985	0.9992	0.9926	0.9863	0.9997	0.9993	0.995	0.9953	0.9988	0.9948	0.9982	0.9992	0.9978	0.9969	0.9977	0.9985	0.9984	0.9835	0.9901	0.9992	0.9899	0.9953	0.999	0.9959	0.9912	0.9976	0.9989	0.9969	0.9987	0.9994	0.9954	0.9981	0.9975	0.9981	0.999	0.9938	0.9994	0.9985	0.9997
RPL22	380	AT	6			0	1	0.0044	0.0003	0	0	0	0.0005	0	0	0	0.0003	0	0.0003	0.0002	0	0	0	0	0.0003	0	0	0	0	0	0	0	0	0.0002	0.0002	0	0	0	0	0	0	0.0005	0	0	0	0	0.0003	0.0002	0
RPL22	381	AT	5			0	1	0.0044	0.0003	1	1	1	0.9995	1	1	1	0.9997	1	0.9997	0.9998	1	1	1	1	0.9997	1	1	1	1	1	1	1	1	0.9998	0.9998	1	1	1	1	1	1	0.9995	1	1	1	1	0.9997	0.9998	1
RNF207	382	ES	11:12:00	10	13	0	0.8185	0.4713	0.0393	1	1	1	1	1	1		0.9646	1	1	1	1	1	1	1	1	1	1	0.9395	1		1	1	1		1	1	1	1	1	0.8381	1	1		1		1		1	1
ICMT	385	ES	03:04:00	2	5	0	0.9983	0.6149	0.1091	0.745	0.9111	0.7109	0.931	0.9711	0.8225	0.7714	0.9477	0.9685	0.835	0.8772	0.9379	0.7206	0.8133	0.9087	0.9471	0.7239	0.9179	0.618	0.9315	0.8827	0.7713	0.6972	0.6321	0.7689	0.9451	0.9127	0.8618	0.7099	0.8021	0.7673	0.6006	0.6103	0.732	0.9036	0.8949	0.876	0.6302	0.8018	0.8829
ICMT	386	ES	4	2	5	0	1	0.2862	0.0351	0.9511	0.981	0.957	0.9835	0.9908	0.9394	0.9325	0.9866	0.9871	0.9512	0.9562	0.9827	0.9129	0.9376	0.9665	0.9867	0.9362	0.9657	0.9205	0.9716	0.9653	0.9258	0.9121	0.9252	0.9542	0.9744	0.9643	0.9632	0.9127	0.9128	0.9454	0.9045	0.9155	0.9525	0.9616	0.9811	0.9607	0.9396	0.9469	0.9473
ICMT	387	ES	3	2	4	0	0.9983	0.6145	0.082	0.1521	0.1851	0.1114	0.2031	0.2661	0.2522	0.22	0.2223	0.3157	0.2323	0.2735	0.236	0.2269	0.2566	0.2856	0.2169	0.1672	0.3135	0.1407	0.3078	0.2438	0.2364	0.2037	0.1438	0.1549	0.3429	0.3032	0.2231	0.2131	0.311	0.178	0.1562	0.1453	0.1377	0.3056	0.159	0.2496	0.1107	0.2094	0.3346
ACOT7	388	AP	3			0	0.9948	0.7895	0.0705	0	0.0561	0.0073	0.0171	0	0.0173	0	0	0	0	0.0103	0.0113	0.1365	0	0.0205	0	0	0.0083	0	0	0	0	0.0569	0	0.0302	0.0353	0.2173	0.01	0	0.0268	0.045	0	0.7895	0	0.0992	0	0	0	0.0744	0
ACOT7	389	AP	1.1			0	0.9948	0.9611	0.1875	0.1193	0.3287	0.1616	0.2548	0.5947	0.1779	0.621	0.1948	0.4214	0.5543	0.4653	0.2674	0.4925	0.305	0.1716	0.0437	0.4268	0.05	0.2443	0.6372	0.518	0.1714	0.3294	0.285	0.6018	0.4871	0.589	0.2177	0.1401	0.2743	0.5023	0.4523	0.1062	0.3971	0.4301	0.296	0.3017	0.1754	0.3174	0.375
ACOT7	390	AP	4			0	0.9948	0.7777	0.175	0.2415	0.1643	0.1456	0.3767	0.1221	0.3126	0.0926	0.0286	0.0902	0.0339	0.2261	0.332	0.2823	0.0255	0.4179	0.0013	0.165	0.0471	0.0158	0.2578	0.1523	0.245	0.1985	0.0886	0.1564	0.0934	0.1756	0.4931	0.6649	0.2428	0.4077	0.2265	0.089	0.4884	0.2725	0.279	0.1871	0.0697	0.0625	0.5176
ACOT7	391	AP	2			0	0.9948	0.9549	0.2152	0.6392	0.451	0.6855	0.3513	0.2832	0.4922	0.2864	0.7765	0.4884	0.4118	0.2983	0.3893	0.0887	0.6695	0.3899	0.9549	0.4082	0.8946	0.7399	0.1049	0.3297	0.5835	0.4151	0.6264	0.2116	0.3842	0.0181	0.2792	0.195	0.4561	0.045	0.3212	0.0153	0.1145	0.1983	0.425	0.5111	0.7549	0.5457	0.1074
ACOT7	392	AT	10			0	1	0.5168	0.0511	0.0783	0.0445	0.0115	0.0722	0.0865	0.0297	0.0372	0.0189	0.1101	0.01	0.1002	0.0323	0.0232	0.0728	0.0795	0.0231	0.0408	0.0333	0.0277	0.0996	0.0326	0.0217	0.0543	0.0305	0.0342	0.0182	0.0281	0.0385	0.0082	0.0338	0.0505	0.0272	0.0075	0.0224	0.0513	0.0234	0.0194	0.0131	0.0101	0.0262
ACOT7	393	AT	14			0	1	0.5168	0.0511	0.9217	0.9555	0.9885	0.9278	0.9135	0.9703	0.9628	0.9811	0.8899	0.99	0.8998	0.9677	0.9768	0.9272	0.9205	0.9769	0.9592	0.9667	0.9723	0.9004	0.9674	0.9783	0.9457	0.9695	0.9658	0.9818	0.9718	0.9615	0.9918	0.9662	0.9495	0.9728	0.9925	0.9776	0.9487	0.9766	0.9806	0.9869	0.9899	0.9738
ACOT7	395	ES	12.1:12.2	11	13	0	0.986	0.0548	0.0079	0	0.0119	0	0	0	0	0.007	0	0	0.0007	0	0	0	0.0065	0	0.004	0	0	0.0056	0.0023	0.0045	0.002	0.0033	0	0	0.0016	0	0.0044	0	0	0	0	0.0027	0	0	0	0.0035	0	0	0.0163
ACOT7	396	ES	12.2	11	13	0	0.986	0.0403	0.0034	0	0	0	0	0	0	0	0.004	0	0	0	0	0	0	0	0	0	0	0	0.0035	0	0.0031	0	0	0	0.0029	0	0	0	0	0	0	0	0	0	0	0	0	0	0
ACOT7	397	ES	1.2:5	1.1	6	0	0.9843	0.0185	0.0008	1	1	1	1	1	1	1	1	1	1	1	1	1	1	1	1	1	1	1	1	1	1	1	1	1	1	1	1	1	1	1	1	1	1	1	1	1	1	1	1
HES2	400	AT	4.3			0	1	0.6437	0.111	0.6329	0.6887	0.6081	0.7026	0.6179	0.5718	0.4816	0.7291	0.5253	0.5284	0.8445	0.6466	0.686	0.5636	0.6227	0.6603	0.4263	0.6881	0.5033	0.5554	0.697	0.6502	0.5521	0.5843	0.6209	0.6381	0.7745	0.728	0.5576	0.5613	0.4811	0.5514	0.7352	0.6835	0.4649	0.6307	0.6252	0.3933	0.7618	0.5636
HES2	401	AT	5			0	1	0.6437	0.111	0.3671	0.3113	0.3919	0.2974	0.3821	0.4282	0.5184	0.2709	0.4747	0.4716	0.1555	0.3534	0.314	0.4364	0.3773	0.3397	0.5738	0.3119	0.4967	0.4446	0.303	0.3498	0.4479	0.4157	0.3791	0.3619	0.2255	0.272	0.4424	0.4387	0.5189	0.4486	0.2648	0.3165	0.5351	0.3693	0.3748	0.6067	0.2382	0.4364
TNFRSF25	409	RI	6.4	6.3	6.5	0	0.8796	0.147	0.0111	1	1	1	1	1	1	1	1	1	1	1	1	1	1	1		1	1	1	1	1	1	1	1	1	1	1	1	1	1	1				1	1	1	1	1	1
TNFRSF25	410	RI	6.3:6.4	6.2	6.5	0	0.9267	0.9189	0.1649	0.8825	0.5846	0.604	0.5952	0.8073	0.5615	0.5239	0.7684	0.7516	0.6963	0.838	0.4735	0.5022	0.9072	0.6175		0.4822	0.7364	0.6506	0.9225	0.2835	0.4822	0.8613	0.7171	0.5949	0.2481	0.5688	0.8124	0.7884	0.4822	0.8073	0.3177			0.8984	0.3023	0.8563	0.8934	0.7364	0.6082
TNFRSF25	412	ES	6.3:6.4:6.5:7.1	6.2	7.2	0	0.9354	0.2569	0.0372	1	0.964	1	0.9864	1	1	1	1	1	0.979	1	1	1	1	1		1	0.965	1	0.9878	0.7835	1	1	1	1	0.9621	1	1	1	0.8029	1				1	0.813	1	1	0.8989	1
TNFRSF25	415	ES	6.1:6.2:6.3:6.4:6.5:7.1	5	7.2	0	0.7836	0.5027	0.0746	1	0.8886		1	1	1	1	1		1	1	1	1	1	1			0.7979	1	1			1	0.8856	1	0.6983		0.9753	0.5402		1				1		1	1	1
TNFRSF25	416	ES	6.2:6.3:6.4:6.5:7.1	5	7.2	0	0.8709	0.3376	0.0518	1	0.9534	1	1	1	1	1	1	1	1	1	1	1	1	1		0.8321	0.9055	1	1	1	1	1	0.9245	1	0.9551	1	0.9684	0.7763	0.7098	1				1	1			1	1
TNFRSF25	425	AA	6.1:6.2:6.3:6.4	5	6.5	0	0.7609	0.9059	0.1333	0.9473	0.9071		0.8246	1	0.7565	0.6688	0.8024		0.894	0.9812	0.6539	0.7726	1	0.8792			1	1	0.8304			0.9128	0.9065	0.5399	0.0941		0.9219			0.8271				1		0.8389	1	0.8818
TNFRSF25	426	AA	6.2:6.3:6.4	5	6.5	0	0.8569	0.6137	0.1001	0.9318	0.9615	1	0.9093	1	0.8598	0.798	0.8937	1	0.9091	0.9761	0.8919	0.7829	1	0.951		0.8528	1	1	0.8342	1	1	0.8792	0.9385	0.7594	0.4865	0.8679	0.9013	1	0.7755	0.8281				1	0.7044			0.8004	1
TNFRSF25	432	ES	5:6.2:6.3:6.4:6.5:7.1:7.2	4	8	0	0.911	0.0567	0.004	1	1	1	1	1	1	1	1	1	1	1	1	1	1	1	1	1	1	1	1	1	1	1	1	1	1	1	1	1	1	1				1	1		1	1	1
TNFRSF25	436	ES	5:6.2:6.5:7.1:7.2	4	8	0	0.7731	0.1412	0.0092	1	1	1	1	1	1	1	1	1	1	1	1	1		1		1	1	1	1	1	1		1	1	1	1	1	1	1		1				1			1	1
TNFRSF25	443	ES	3:4:5:6.2:6.3:6.4:6.5:7.1	2	7.2	0	0.918	0.1865	0.018	1	1	1	1	1	1	1	1	1	1	1	1	1	1	1	1	1	1	1	0.978	1	0.8135	1	1	1	1	1	1	1	1	1		1		1	1		1	1	1
TNFRSF25	451	ES	3:4:5:6.2:6.5:7.1	2	7.2	0	0.836	0.4351	0.0381	1	1	1	1	1	1	1	1	1	1	1	1	1	1	1		1	1	1	0.8237	1	0.8021	1	1	1	1	1	1	1	1		1	1			1			1	1
TNFRSF25	461	ES	3	2	4	0	0.9354	0.1744	0.0215	1	0.9829	1	0.9861	1	1	1	1	1	1	1	1	1	1	1		1	1	1	0.9837	0.9443	1	1	0.9535	1	0.95	1	0.9732	1	1	1	0.8256	1		1	1	1	1	1	1
PLEKHG5	472	RI	27.2	27.1	27.3	0	0.9895	0.3731	0.0279	1	0.9529	0.9825	0.9904	0.9277	0.9844	1	1	1	0.9903	1	1	0.9786	1	0.968	0.6269	1	1	1	0.9878	1	1	0.9809	1	1	0.9849	1	0.9824	1	1	0.9576	1	1	1	1	1	1	0.7989	0.9587	1
PLEKHG5	473	AA	27.1:27.2:27.3	26	27.4	0	0.9965	0.4392	0.025	0.9714	1	1	0.9917	1	1	0.9851	0.9689	1	1	1	1	0.9785	0.9347	1	1	1	1	1	1	1	0.9675	1	1	1	1	1	1	1	1	1	1	1	0.9627	1	1	1	1	0.9643	1
KLHL21	477	AP	1			0	0.9948	0.1539	0.0115	0	0	0	0	0	0	0	0	0	0.0128	0.0197	0	0	0	0	0	0	0	0	0	0	0	0	0	0	0	0	0	0	0	0	0	0	0	0	0	0	0	0	0
KLHL21	478	AP	2			0	0.9948	0.1539	0.0115	1	1	1	1	1	1	1	1	1	0.9872	0.9803	1	1	1	1	1	1	1	1	1	1	1	1	1	1	1	1	1	1	1	1	1	1	1	1	1	1	1	1	1
KLHL21	481	RI	4.2	4.1	4.3	0	1	0.4255	0.0777	0.9365	0.901	0.8682	1	0.9393	1	0.6781	1	1	0.7498	0.9403	0.9509	0.8477	1	1	1	0.7213	1	0.8939	0.9444	1	0.8793	0.8616	0.6523	1	0.8871	0.7722	0.962	1	1	1	1	1	1	0.9198	0.7815	1	1	0.9393	1
KLHL21	482	RI	4.2:4.3	4.1	4.4	0	1	0.9186	0.157	0.394	0.2078	0.1766	0.312	0.1938	0.1636	0.2134	0.1309	0.4577	0.1334	0.287	0.1778	0.115	0.3244	0.2503	0.2413	0.2571	0.2052	0.1759	0.3587	0.2676	0.1228	0.1753	0.2118	0.2112	0.155	0.1909	0.2347	0.2627	0.2521	0.1591	0.141	0.2689	0.1714	0.239	0.1291	0.14	0.2162	0.1538	0.1855
KLHL21	483	AA	4.3	4.1	4.4	0	0.9389	0.3036	0.0282	0.0335	0.0295	0.0222	0	0.0093	0	0.0684	0	0	0.0345	0.0162	0.0067	0.0153	0	0	0	0.0715	0	0.0164	0.0266	0	0.0134	0.029	0.0928	0	0.0222	0.0601	0.0112	0	0	0	0		0	0.0221	0.0299	0	0	0.0074	0
THAP3	486	AT	7			0	1	0.5231	0.0773	0.2804	0.2664	0.2912	0.3126	0.346	0.3115	0.3609	0.301	0.3465	0.3157	0.3335	0.3258	0.2976	0.3653	0.3313	0.3337	0.3709	0.3522	0.3216	0.3459	0.3245	0.3022	0.3136	0.291	0.3751	0.328	0.3347	0.323	0.2057	0.2234	0.3057	0.1664	0.2554	0.3469	0.2011	0.2097	0.215	0.2337	0.3141	0.3562
THAP3	487	AT	6			0	1	0.5231	0.0773	0.7196	0.7336	0.7088	0.6874	0.654	0.6885	0.6391	0.699	0.6535	0.6843	0.6665	0.6742	0.7024	0.6347	0.6687	0.6663	0.6291	0.6478	0.6784	0.6541	0.6755	0.6978	0.6864	0.7089	0.6249	0.672	0.6653	0.677	0.7943	0.7766	0.6943	0.8336	0.7446	0.6531	0.7989	0.7903	0.785	0.7663	0.6859	0.6438
THAP3	488	AA	5.1	4.2	5.2	0	0.9738	0.2876	0.0267	0.0457	0.013	0.0342	0.0193	0.0325	0.0307	0.028	0.0073	0	0.0208	0.0376	0	0	0	0.0408	0	0.0585	0.0091	0.0383	0.048	0.0313	0	0	0	0	0.0071	0	0.0301	0.0339	0.018	0	0	0	0	0.0076	0	0	0	0.0125	0.0147
THAP3	489	AA	4.1	3	4.2	0	0.9721	0.4629	0.0753	0.8532	0.9088	0.809	0.8024	0.8332	0.7241	0.9603	0.8794	0.5371	0.6214	0.7763	0.8017	0.848	1	0.9141	0.8948	0.853	0.8192	0.8735	0.8823	0.9355	0.8341	0.8739	0.757	0.7854	0.8286	0.78	0.8693	0.7904	0.8627	0.8994	0.909	0.7996	0.7437	0.8506	0.8201	0.8478	0.9226	0.8221	0.7614
DNAJC11	491	AP	2			0	0.9948	0.4061	0.0294	0	0	0	0	0	0	0	0	0	0.0067	0	0	0	0	0	0	0	0	0	0	0	0	0	0	0	0	0	0	0	0	0	0	0	0	0	0	0	0	0	0
DNAJC11	492	AP	1			0	0.9948	0.4061	0.0294	1	1	1	1	1	1	1	1	1	0.9933	1	1	1	1	1	1	1	1	1	1	1	1	1	1	1	1	1	1	1	1	1	1	1	1	1	1	1	1	1	1
DNAJC11	495	ES	12	11	13	0	1	0.0826	0.0127	1	0.971	0.9931	0.9811	0.9896	0.9836	1	0.9957	0.9627	0.9975	0.991	0.9863	0.9862	1	0.9606	0.9966	1	1	0.9961	0.993	0.9851	0.9728	0.9948	0.9824	0.9925	0.981	1	0.9874	1	1	0.9884	0.9507	0.9872	0.9595	0.9736	0.9683	1	1	0.9949	0.9911
DNAJC11	496	ES	9.2:10:11:12:13:14:15:16:17.1	9.1	17.2	0	1	0.1049	0.0112	0.9892	0.9805	1	0.9797	1	1	0.9776	0.9952	0.9825	0.9871	0.9879	0.9966	0.9932	1	1	0.9824	1	0.9834	0.9873	0.9784	0.9921	1	1	1	0.984	0.9843	0.968	1	0.9643	1	1	0.9365	1	0.9854	0.9806	1	1	1	0.9845	0.9907
DNAJC11	498	ES	4	3	5	0	1	0.0712	0.0103	1	1	1	0.9941	0.9844	0.9629	1	1	1	0.9964	1	1	1	1	1	1	1	1	1	1	1	1	0.9936	0.989	1	1	0.9534	1	1	1	1	1	1	1	1	1	1	1	0.9918	1
CAMTA1	501	AT	26			0	1	0.3061	0.0436	0.1209	0.0495	0.0584	0.0383	0.0765	0.0292	0.0747	0.0038	0.0248	0.0112	0.2056	0.0156	0.0198	0.0854	0.0604	0.006	0.0812	0.0103	0.0058	0.0764	0.0659	0.0867	0.0734	0.0329	0.0364	0.0369	0.0983	0.0545	0.0077	0.0198	0.0158	0.0031	0.0164	0.018	0.0219	0.0229	0.0517	0.0047	0.0048	0.0498
CAMTA1	502	AT	5			0	1	0.4025	0.0642	0.7496	0.7673	0.852	0.7804	0.7123	0.7813	0.781	0.7783	0.6737	0.9063	0.6398	0.8368	0.8685	0.741	0.8043	0.7867	0.7859	0.7596	0.8456	0.7181	0.6795	0.839	0.8037	0.86	0.8587	0.7454	0.7284	0.7821	0.8245	0.8805	0.8842	0.9016	0.8785	0.8209	0.6422	0.861	0.8585	0.8113	0.8982	0.7859
CAMTA1	503	AT	6			0	1	0.3219	0.0501	0.1294	0.1832	0.0896	0.1813	0.2112	0.1895	0.1444	0.2179	0.3015	0.0825	0.1546	0.1476	0.1117	0.1737	0.1353	0.2073	0.1329	0.2301	0.1486	0.2056	0.2546	0.0743	0.1229	0.1071	0.105	0.2177	0.1733	0.1634	0.1678	0.0996	0.1	0.0953	0.1052	0.1611	0.3359	0.1161	0.0897	0.184	0.097	0.1643
CAMTA1	506	ME	2|3	1	4	0	1	0.2368	0.0141	0	0.0082	0	0.0133	0.0158	0.0297	0.0156	0.0125	0.0107	0.0066	0	0.0074	0.0058	0.0238	0	0.0219	0.0259	0.0047	0.0079	0	0.0061	0	0.0092	0.0123	0.0069	0.0086	0.0051	0.0071	0	0	0.003	0	0	0	0	0.0054	0.0081	0.0097	0	0.0058
CAMTA1	507	ES	3	1	4	1	0.9913	0.4545	0.046	0.8224	0.8823	0.8534	0.806	0.8627	0.8442	0.7859	0.9335	0.818	0.9655	0.8275	0.8878	0.9157	0.8846	0.8262	0.7808	0.8043	0.9267	0.8915	0.8348	0.8968	0.8826	0.8708	0.8545	0.899	0.8172	0.8167	0.8957	0.8557	0.9074	0.8954	0.8955	0.8816	0.8221	0.8795	0.908	0.9075	0.9205	0.9631	0.8503
CAMTA1	508	ES	2	1	4	1	0.9773	0.5051	0.0574	0	0.0583	0	0.0529	0.0916	0.1423	0.055	0.1509	0.0463	0.1576	0	0.0554	0.0599	0.1574	0	0.0737	0.0987	0.0563	0.0614	0	0.0509	0	0.0586	0.0682	0.0581	0.0373	0.0222	0.0583	0	0	0.0255	0	0	0	0	0.051	0.0739	0.1019	0	0.0318
VAMP3	509	AP	1			0	1	0.9029	0.107	0.8827	0.9047	0.8295	0.7736	0.8698	0.8867	0.8328	0.9166	0.8841	0.7373	0.8851	0.8328	0.9279	0.837	0.8129	0.8383	0.8253	0.9096	0.8001	0.829	0.8396	0.9019	0.9124	0.6438	0.8845	0.7356	0.8432	0.8691	0.9139	0.874	0.8794	0.8942	0.9068	0.9383	0.9107	0.8893	0.9001	0.8551	0.9011	0.8897
VAMP3	510	AP	2			0	1	0.9029	0.107	0.1173	0.0953	0.1705	0.2264	0.1302	0.1133	0.1672	0.0834	0.1159	0.2627	0.1149	0.1672	0.0721	0.163	0.1871	0.1617	0.1747	0.0904	0.1999	0.171	0.1604	0.0981	0.0876	0.3562	0.1155	0.2644	0.1568	0.1309	0.0861	0.126	0.1206	0.1058	0.0932	0.0617	0.0893	0.1107	0.0999	0.1449	0.0989	0.1103
PER3	513	AT	10.2			0	1	0.3275	0.0281	0.0097	0.0106	0	0.0695	0	0	0	0	0	0.0058	0.0234	0.0044	0	0.0108	0.0078	0	0	0	0.0403	0.0564	0	0.0097	0	0.0338	0	0.0133	0.0096	0	0	0	0	0	0	0	0.0468	0	0	0.0447	0.0436	0.0075
PER3	514	AT	22			0	1	0.3275	0.0281	0.9903	0.9894	1	0.9305	1	1	1	1	1	0.9942	0.9766	0.9956	1	0.9892	0.9922	1	1	1	0.9597	0.9436	1	0.9903	1	0.9662	1	0.9867	0.9904	1	1	1	1	1	1	1	0.9532	1	1	0.9553	0.9564	0.9925
UTS2	520	AT	5.2			0	0.925	0.7708	0.1712	0.2428	0.2627	0.445	0.3564		0.1186	0	0	0.383	0	0.3427	0.244	0.2745	0.3096		0.4994	0.2177	0.1521		0.2301	0.5239	0.3794	0.4124	0.3856	0	0.4681	0.2875	0.3943	0.1152	0.3393	0.2875	0.4232	0	0.2237	0	0.4297	0.5041	0.2237	0.6801	0.2954
UTS2	521	AT	7			0	0.925	0.7708	0.1712	0.7572	0.7373	0.555	0.6436		0.8814	1	1	0.617	1	0.6573	0.756	0.7255	0.6904		0.5006	0.7823	0.8479		0.7699	0.4761	0.6206	0.5876	0.6144	1	0.5319	0.7125	0.6057	0.8848	0.6607	0.7125	0.5768	1	0.7763	1	0.5703	0.4959	0.7763	0.3199	0.7046
PARK7	523	AP	1.1			0	1	0.1777	0.0147	0.9982	0.9985	1	0.9977	0.9925	0.997	0.997	0.9974	1	0.9968	0.9966	0.9987	1	1	0.9963	1	0.9969	0.9977	0.9897	0.9974	0.9988	1	0.9939	0.9983	0.9968	0.9913	0.9977	0.997	0.9967	0.9916	0.9946	0.9955	0.9978	0.9968	0.9972	0.9943	0.9964	0.9971	0.9975	0.9922
PARK7	524	AP	2.1			0	1	0.1777	0.0147	0.0018	0.0015	0	0.0023	0.0075	0.003	0.003	0.0026	0	0.0032	0.0034	0.0013	0	0	0.0037	0	0.0031	0.0023	0.0103	0.0026	0.0012	0	0.0061	0.0017	0.0032	0.0087	0.0023	0.003	0.0033	0.0084	0.0054	0.0045	0.0022	0.0032	0.0028	0.0057	0.0036	0.0029	0.0025	0.0078
PARK7	526	ES	5	4	6	0	1	0.0116	0.0015	0.9977	0.9966	0.9955	0.9981	0.998	0.9982	0.9982	0.999	1	0.998	0.9973	0.9975	0.9993	0.9986	0.9987	1	0.9988	0.9987	0.9984	0.9974	0.9974	0.9987	0.9982	0.9974	0.998	0.996	0.9986	0.9983	0.9986	0.9987	0.9977	0.998	0.9973	0.9991	0.9993	0.9975	0.9978	0.9972	0.9976	0.9973
PARK7	528	AD	1.2	1.1	3	0	1	0.6019	0.0913	0.5482	0.5708	0.5458	0.6798	0.612	0.5683	0.4062	0.5715	0.6599	0.4909	0.5382	0.6275	0.6591	0.6671	0.6556	0.5506	0.6311	0.5326	0.6096	0.5723	0.4908	0.6632	0.6205	0.6138	0.3946	0.4844	0.4944	0.6369	0.3211	0.6061	0.6055	0.6104	0.3287	0.692	0.5939	0.5625	0.4447	0.4248	0.5727	0.6781
ERRFI1	531	AT	3.4			0	1	0.0488	0.0066	0.9906	0.9969	0.9989	0.9906	0.997	0.9917	0.9854	0.9979	0.9873	0.992	0.9913	0.995	0.9952	0.9949	0.9911	0.9979	0.9972	0.9953	0.9543	0.9851	0.9985	0.9956	0.9814	0.9969	0.9954	0.9912	0.9971	0.9941	0.9901	0.9913	0.9973	0.9969	0.9976	0.9974	0.9943	0.9995	0.9948	0.9879	0.999	0.9958
ERRFI1	532	AT	4			0	1	0.0488	0.0066	0.0094	0.0031	0.0011	0.0094	0.003	0.0083	0.0146	0.0021	0.0127	0.008	0.0087	0.005	0.0048	0.0051	0.0089	0.0021	0.0028	0.0047	0.0457	0.0149	0.0015	0.0044	0.0186	0.0031	0.0046	0.0088	0.0029	0.0059	0.0099	0.0087	0.0027	0.0031	0.0024	0.0026	0.0057	0.0005	0.0052	0.0121	0.0011	0.0043
ERRFI1	533	RI	3.3	3.2	3.4	0	1	0.8891	0.179	0.6479	0.3106	0.1383	0.2463	0.2926	0.0954	0.119	0.1382	0.2409	0.0992	0.3411	0.1174	0.0548	0.3326	0.1753	0.1188	0.2042	0.2675	0.2135	0.4863	0.1162	0.1994	0.2437	0.2103	0.1925	0.1649	0.1781	0.1706	0.2357	0.2163	0.1486	0.1139	0.2171	0.0875	0.3196	0.0525	0.0992	0.3162	0.0805	0.092
ERRFI1	534	AA	3.1:3.2:3.3	2	3.4	0	0.9703	0.9536	0.2452	0.9157	1	0.7204	0.8694	0.8555	0.3594	1	0.7371	1		0.9183	0.8577	0.6141	0.6503	0.3652	0.7351	0.5048	0.8508	0.4169	1	0.6275	0.5795	0.5928	0.6177	0.5359	0.4268	0.482	1	0.3859	0.5351	0.1957	0.2653	0.4827		0.518	0.6039	1	1	0.4746
ERRFI1	535	AA	3.2:3.3	2	3.4	0	1	0.7383	0.0935	0.9796	1	0.9534	0.978	0.9759	0.7478	1	0.9608	1	0.9153	0.9896	0.9777	0.6176	0.9305	0.7915	0.966	0.9161	0.9794	0.8537	1	0.9249	0.9138	0.9249	0.9021	0.9101	0.9026	0.9054	1	0.9255	0.9373	0.8146	0.7282	0.8727	1	0.9324	0.9381	1	1	0.8856	0.7697
ERRFI1	536	ES	3.1:3.2	2	3.4	0	0.9459	0.7783	0.1051	0.8852	1	0.9564	0.9664	0.9524	0.8787	1	0.9607	1	0.8574	0.9681	0.9838	0.9192	0.8191	0.7663	0.9669	0.8215	0.9543	0.7841	1	0.9443	0.889	0.8605	0.8876	0.8699	0.84	0.8503	1		0.8512	0.6523	0.7961	0.8155	1	0.7518	0.9739	1		0.936	0.7607
ERRFI1	537	ES	3.2	2	3.4	0	1	0.2066	0.0225	0.9713	1	0.9943	0.9948	0.9927	0.9742	1	0.9953	1	0.9927	0.9961	0.9977	0.9879	0.9701	0.9556	0.9967	0.9801	0.9943	0.9672	1	0.9919	0.9839	0.9811	0.9782	0.9831	0.9848	0.983	1	0.9797	0.9866	0.971	0.9664	0.9702	1	0.9748	0.9973	1	1	0.9921	0.9793
ERRFI1	538	AA	3.1	2	3.2	0	0.9948	0.4081	0.0604	0.1941	0.0891	0.1157	0.1351	0.1319	0.1653	0.1111	0.1066	0.1672	0.0443	0.1099	0.1243	0.1245	0.1267	0.136	0.0919	0.0882	0.1112	0.1138	0.1299	0.125	0.1192	0.1097	0.1541	0.1063	0.0773	0.093	0.0957	0.0502	0.0739	0.0545	0.1219	0.1236	0.1535	0.0757	0.0947	0.0984		0.1082	0.0649
RERE	541	AP	9			0	0.9791	0.8336	0.1571	0.45	0.1431	0.4717	0.2447	0.1547	0.2217	0.1493	0.3189	0.1878	0.4892	0.2347	0.1959	0.2158	0.4522	0.0677	0.1928	0	0.4185	0.3793	0.2399	0.2311	0.2043	0.2961	0.271	0.1353	0.0796	0.0489	0.3707	0.7273	0.4835	0.2305	0		0.2136	0.1978	0.6404	0.4834	0	0.4251	0.5159
RERE	543	AP	14			0	0.9791	0.8056	0.1448	0.192	0.3664	0.2536	0.3671	0.2784	0.4275	0.4478	0.2944	0.3521	0.3058	0.4401	0.2712	0.4854	0.3165	0.4567	0.1052	0.3902	0.3139	0.1897	0.2999	0.26	0.2298	0.309	0.2439	0.5836	0.2149	0.5135	0.2502	0.2727	0.2418	0.5533	0.2812		0.6408	0.2966	0.1196	0.2406	0.3346	0.2126	0.3009
RERE	544	AP	1			0	0.9791	1	0.1588	0.358	0.4904	0.2747	0.3882	0.5669	0.3508	0.4029	0.3868	0.4601	0.205	0.3251	0.5329	0.2988	0.2312	0.4757	0.7021	0.6098	0.2675	0.431	0.4601	0.5089	0.5659	0.395	0.4851	0.2811	0.7055	0.4376	0.3791	0	0.2747	0.2161	0.7189		0.1456	0.5056	0.24	0.276	0.6654	0.3623	0.1832
RERE	545	ES	18:19:20:21:22:23:24	17	25	0	1	0.0107	0.0008	1	1	1	1	1	1	1	1	1	0.9953	1	1	1	1	1	1	1	1	1	1	1	1	1	1	1	1	1	1	1	1	1	1	1	1	1	1	1	1	1	1
RERE	546	ES	5	4	6	1	0.7749	0.4545	0.0794	0.7629	0.8791	0.8406	0.819	0.8928	0.8082	0.8044	0.905	0.7669	0.8389	0.7217	0.8641	0.7873	0.6902	0.8393	0.856	0.7452		0.9162		0.8353	0.7713	0.9309	0.7757	0.908	0.8594	0.8824	0.9326			0.8424				0.8298				0.8605
CA6	548	AT	3			0	0.9738	0.9916	0.2529	0.9032	1	1	0.7262	0.3724	0.4057	1	0.8094	1	0.4786	0.8849	0.3916	1	1	1	0.4134	0.1125	0.6094	0.934	0.3406	1	1	0.901	1	0.6692	0.2158	1	0.8605	1	1	0.501		1		0.8499	0.2839	1	1	0.9189	0.8731
CA6	549	AT	10			0	0.9738	0.9565	0.2335	0.0968	0	0	0.1436	0.6276	0.5943	0	0.1906	0	0.4141	0.1151	0.5109	0	0	0	0.4181	0.8344	0.3906	0.066	0.6594	0	0	0.099	0	0.3308	0.7421	0	0.1395	0	0	0		0		0.1501	0.0875	0	0	0.0811	0.1269
CA6	550	AT	9			0	0.9738	0.6285	0.0692	0	0	0	0.1302	0	0	0	0	0	0.1073	0	0.0975	0	0	0	0.1685	0.0531	0	0	0	0	0	0	0	0	0.0421	0	0	0	0	0.499		0		0	0.6285	0	0	0	0
SLC2A5	556	RI	6.2	6.1	6.3	0	0.7766	1	0.166	0.1032	0.0418	0.0587	0.0862	0.0429	0.0582	0.0802		0.32	0.1792	0.0994	0.0882	0	0.235	0.0947	0.0171		0.0402	0.0601	0.2006	0.0292	0.0171	0.167	0.1395	0.0312	0.0444		0.0445	0.0319	0.0497	0.1156	0.0908		0	0.0564	0.0228	0.3292	0.0171	0.0387
SLC2A5	557	ES	02:03:00	1	5	0	0.8796	0.2939	0.023	0.9736	1	1	0.9917	1	1	1	1	1	1	1	1	1	1	1	1	1	1	1	1	1	1	1	1	0.9759	1	1	1	1	1	1	1	1	1	1	1	1	1	1	1
GPR157	558	ES	3	2	4	0	0.9581	0.6718	0.1208	0.661	0.6917	0.854	0.78	0.9256	0.8519	0.8393	0.854	0.7367	0.8377	0.8615	0.8339	0.8017	0.5383	0.8615	0.8309	0.7612	0.7348	0.7437	0.6999	0.7367	0.6999	0.776	0.7312	0.7255	0.6105	0.9136	0.7758	0.7027	0.7195	0.8132	0.6632	0.7738	1	0.9514	0.8325	0.9136		0.7195	0.8519
SPSB1	561	AP	3.1			0	0.9302	0.7468	0.0738	0	0	0.0477	0	0.0525	0	0	0	0	0	0	0	0	0	0	0.2965	0	0	0	0	0	0	0.0441	0	0	0	0	0.0434		0	0	0	0	0	0.0508	0	0	0	0	0.1232
SPSB1	562	AP	1			0	0.9302	0.9727	0.1274	0.8978	1	0.9523	0.9876	0.8724	1	1	1	1	0.984	0.9908	0.9882	1	1	1	0.7035	1	0.9822	1	1	1	0.9382	0.9559	0.9858	0.9684	0.9876	1	0.9411		1	1	1	1	1	0.8948	1	1	1	0.9723	0.8768
SPSB1	563	AP	2			0	0.9302	0.9046	0.0955	0.1022	0	0	0.0124	0.075	0	0	0	0	0.016	0.0092	0.0118	0	0	0	0	0	0.0178	0	0	0	0.0618	0	0.0142	0.0316	0.0124	0	0.0155		0	0	0	0	0	0.0544	0	0	0	0.0277	0
TMEM201	564	AT	11			0	1	0.6964	0.119	0.6112	0.4563	0.3966	0.6221	0.4874	0.5879	0.3027	0.7653	0.615	0.6429	0.6424	0.5968	0.5629	0.5905	0.6779	0.5833	0.515	0.6589	0.6942	0.3182	0.5757	0.5156	0.54	0.7568	0.5566	0.2558	0.5216	0.689	0.5073	0.4069	0.6556	0.6832	0.4842	0.3608	0.5861	0.5915	0.7952	0.7157	0.6441	0.4214
TMEM201	565	AT	6.2			0	1	0.6964	0.119	0.3888	0.5437	0.6033	0.3779	0.5126	0.4121	0.6973	0.2347	0.385	0.3571	0.3576	0.4032	0.4371	0.4095	0.3221	0.4167	0.485	0.3411	0.3058	0.6818	0.4243	0.4844	0.46	0.2432	0.4434	0.7442	0.4784	0.311	0.4927	0.5931	0.3444	0.3168	0.5158	0.6392	0.4139	0.4085	0.2048	0.2843	0.3559	0.5786
TMEM201	566	ES	8	7	9	0	0.8621	0.2186	0.044	1	1	1	0.9668		1	1	1		0.9895	1	1	1	1	0.8319	1	1	1	0.9612	1	0.939	1	1	1	1	0.9147	1	1			1	1	1		1	1	0.9421		1	0.8773
PIK3CD	572	RI	17.2	17.1	17.3	0	0.8796	1	0.144	0.3623	0.1037	0.0495	0.1255	0.094	0.1703		0.0568		0.3777	0.1691	0.0486	0	0.1882	0.2261	0.0285	0.0825	0.046	0.0743	0.3258	0.0404	0.2849	0.0945	0.1798	0.0361	0.1507	0.0697	0.0949	0.1835	0.0532	0.1835	0.0632			0.1232	0.0799	0.0649		0.0481	0.0158
PIK3CD	574	AA	8.1	7	8.2	0	0.9442	0.1799	0.0244	1	0.9798	0.9546	0.9671	1	0.9688	1	1	1	1	1	0.9762	1	0.9146	1	1	1	0.958	0.9339	1	1	1	0.9805	0.9688	1	0.9841	1	0.972	1	0.9297	0.9377	1		0.9642	1	1	1	1	1	0.9629
CLSTN1	575	ES	11	10	12	0	0.9983	0.9011	0.1633	0.0769	0.1423	0.2776	0.3137	0.1387	0.1285	0.1837	0.0471	0.1362	0.5496	0.1726	0.1338	0.0861	0.4149	0.0747	0.3674	0.5251	0.08	0.0926	0.1379	0.4744	0.2328	0.0619	0.0653	0.3588	0.0775	0.0555	0.5016	0.3062	0.1278	0.112	0.0951	0.1033	0.1268	0.2195	0.1212	0.1308	0.1223	0.1546	0.5145
CLSTN1	576	ES	3	2	4	0	0.9773	0.7799	0.1224	0.0857	0.1579	0.1505	0.2469	0.1157	0.0972	0.1124	0.0141	0.0945	0.0544	0.0951	0.1281	0.0577	0.2237	0.0792	0.0887	0.3783	0.0387	0.0545	0.1614	0.1727	0.1571	0.0401	0.0561	0.2963	0.1773	0.0411	0.1561		0.1395	0.1366	0.1449	0.0798	0.0723	0.1828	0.1328	0.1239	0	0.0562	0.3565
CTNNBIP1	577	AP	1			0	0.9948	1	0.1948	0.5525	0.7133	0.3102	0.7232	0.7673	0.7566	0.7407	0.2628	0.4594	0.7141	0.4062	0.4998	0.6402	0.6562	0.7403	0.8358	0.4551	0.278	0.8957	0.9145	0.6224	0.6662	0.3922	0.555	0.8648	0.8237	0.5688	0.5165	0.8022	0.5695	0.6247	0.4969	0.4378	0.6906	0.6719	0.3437	0.495	0.773	0.6179	0.6539
CTNNBIP1	578	AP	2			0	0.9948	1	0.1758	0.3978	0.1911	0.2633	0.2768	0.2327	0.044	0.0895	0.6099	0	0.1543	0.5565	0.2743	0.1254	0.3438	0.0795	0.1642	0.1963	0.2912	0.0094	0.0196	0.1505	0.3338	0.4947	0.1869	0.0503	0	0.3476	0.3024	0.1978	0.2305	0.0177	0.1115	0	0.1809	0.1545	0.2842	0.2233	0.0784	0.2689	0.2379
CTNNBIP1	579	AP	6.1			0	0.9948	0.5684	0.0993	0.0497	0.0956	0.0924	0	0	0.1252	0.1697	0	0	0.1316	0.0372	0.1418	0.1241	0	0.1131	0	0.1595	0	0	0	0.1426	0	0	0.1181	0	0	0	0.181	0	0.1542	0	0.141	0	0.1286	0	0.0834	0.0439	0.1486	0.1133	0.1082
CTNNBIP1	580	AP	4			0	0.9948	0.6562	0.1276	0	0	0.3341	0	0	0.0742	0	0.1273	0.5406	0	0	0.084	0.1103	0	0.067	0	0.1891	0.4309	0.0949	0.0659	0.0845	0	0.113	0.14	0.0848	0.1763	0.0837	0	0	0.0457	0.3577	0.2506	0.5622	0	0.1736	0.2887	0.2378	0	0	0
CTNNBIP1	583	RI	8.2	8.1	8.3	0	0.9983	0.2267	0.0351	0.9659	0.9697	0.9634	0.9527	0.9317	0.9417	0.9338	0.9792	0.9609	0.9652	0.9587	0.9558	0.9742	0.9333	0.976	0.9803	0.9808	0.9192	0.9548	0.9197	0.8966	0.9765	0.9783	0.9375	0.984	0.9328	0.9384	0.9366	1	0.9624	0.9357	0.9255	0.9773	0.9877	0.9396	0.962	0.9387	0.9558	0.9449	0.954
CTNNBIP1	584	ES	3	1	5	0	0.9668	0.6225	0.0961	0.1797	0.1686	0.1571	0.2747	0.2148	0.1261	0.2239	0.2041		0.1261	0.2172	0.1232	0.207	0.2651	0.1327	0.1339	0.3168	0.3639	0.1315	0.0501	0.3297	0.1644	0.1727	0.1261	0.1938	0.1261	0.1356	0.2518	0.1427	0.1896	0.0652	0.2901	0.0976	0.2061	0.3176	0.2578	0.1878	0.0934	0.1528	0.1299
LZIC	586	AP	1			0	0.993	0.7311	0.1258	0.3769	0.5802	0.3325	0.3733	0.4046	0.371	0.3635	0.2958	0.5245	0.3647	0.3856	0.3601	0.4487	0.4313	0.4095	0.2064	0.4313	0.3989	0.3565	0.4793	0.4553	0.3776	0.423	0.4238	0.579	0.4754	0.3776	0.5772	0.2266	0.3214	0.5298	0.2521	0.2719	0.3523	0.4974	0.3158	0.313	0.3422	0.2981	0.5336
LZIC	587	AP	2			0	0.993	0.7311	0.1258	0.6231	0.4198	0.6675	0.6267	0.5954	0.629	0.6365	0.7042	0.4755	0.6353	0.6144	0.6399	0.5513	0.5687	0.5905	0.7936	0.5687	0.6011	0.6435	0.5207	0.5447	0.6224	0.577	0.5762	0.421	0.5246	0.6224	0.4228	0.7734	0.6786	0.4702	0.7479	0.7281	0.6477	0.5026	0.6842	0.687	0.6578	0.7019	0.4664
LZIC	588	AD	3.2	3.1	4	0	0.9983	0.0898	0.0067	0.9938	1	1	0.9957	1	1	1	1	1	0.9977	0.9946	1	1	1	1	0.995	1	1	1	1	1	1	1	1	1	1	1	1	1	1	1	1	1	1	1	1	1	1	1	1
NMNAT1	589	AT	5			0	1	0.3952	0.075	0.5291	0.4228	0.4058	0.4557	0.3593	0.4425	0.4259	0.2877	0.4352	0.4592	0.4221	0.3381	0.3874	0.4236	0.3739	0.3543	0.3881	0.4034	0.3668	0.5267	0.4264	0.2913	0.3782	0.4304	0.4072	0.3795	0.3219	0.3952	0.3247	0.3829	0.349	0.3125	0.2227	0.2581	0.3844	0.4071	0.2852	0.2788	0.4226	0.4217
NMNAT1	590	AT	6.3			0	1	0.3952	0.075	0.4709	0.5772	0.5942	0.5443	0.6407	0.5575	0.5741	0.7123	0.5648	0.5408	0.5779	0.6619	0.6126	0.5764	0.6261	0.6457	0.6119	0.5966	0.6332	0.4733	0.5736	0.7087	0.6218	0.5696	0.5928	0.6205	0.6781	0.6048	0.6753	0.6171	0.651	0.6875	0.7773	0.7419	0.6156	0.5929	0.7148	0.7212	0.5774	0.5783
NMNAT1	591	RI	6.2	6.1	6.3	0	1	0.4579	0.0746	0.603	0.7478	0.6985	0.701	0.6068	0.7387	0.4848	0.6769	0.5027	0.736	0.6822	0.7772	0.8063	0.7303	0.7993	0.6353	0.8502	0.7674	0.7311	0.5565	0.736	0.7909	0.7414	0.5989	0.7633	0.7247	0.7972	0.7166	0.8947	0.8422	0.7572	0.7405	0.8239	0.8415	0.6471	0.7953	0.8111	0.9395	0.7134	0.82
RBP7	592	ES	2	1	3	0	0.9825	0.9658	0.2064	0.4816	0.4442	0.3179	0.3674	0.6039	0.2011	0.3674	0.6077	0.5572	0.1907	0.4856	0.3674	0.1734	0.6077	0.5922	0.0488	0.169	0.2124	0.1576	0.5041	0.2492	0.6991	0.6991	0.5754	0.2663	0.3952	0.5374	0.3616	0.1166	0.2955	0.2026	0.1404	0.1718	0.1622	0.3674	0.0342	0.1979	0.0982	0.2547	0.2002
UBE4B	593	AT	3			0	1	0.4162	0.0528	0.0599	0.0566	0.0428	0.0596	0.0352	0.1626	0.0288	0.0476	0.0442	0.0326	0.0397	0.1594	0.0699	0.0462	0.0564	0.0335	0.0818	0.1455	0.0169	0.0588	0.0302	0.1301	0.0382	0.0691	0.0349	0.0318	0.0604	0.0676	0.1163	0.0745	0.0793	0.1393	0.0524	0.0363	0.101	0.14	0.1452	0.1803	0.0883	0.0545
UBE4B	594	AT	29			0	1	0.4162	0.0528	0.9401	0.9434	0.9572	0.9404	0.9648	0.8374	0.9712	0.9524	0.9558	0.9674	0.9603	0.8406	0.9301	0.9538	0.9436	0.9665	0.9182	0.8545	0.9831	0.9412	0.9698	0.8699	0.9618	0.9309	0.9651	0.9682	0.9396	0.9324	0.8837	0.9255	0.9207	0.8607	0.9476	0.9637	0.899	0.86	0.8548	0.8197	0.9117	0.9455
UBE4B	595	AD	27.2	27.1	28	0	0.9965	0.1117	0.0061	0	0	0	0	0	0	0	0	0	0	0	0	0	0	0	0	0	0	0	0	0.01	0	0	0	0	0	0	0	0	0	0	0	0	0	0	0	0	0	0	0
UBE4B	596	ES	8	7	9	0	0.9354	0.8054	0.0858	0.0975	0.0612	0.0942	0.2704	0.0443	0.1526	0.1137	0.0414	0.0481	0.2219	0.052	0.0873	0.0122	0.0614	0.1055	0.1099	0.0848	0.0547	0.0258	0.136	0.2613	0.2111	0.0697	0.095	0.0745	0.1986	0.0395	0.0874		0.0395	0.0957	0.0848		0.0796	0.0474	0.1744	0.1901		0.0957	0.0709
KIF1B	601	AT	25			0	1	0.683	0.1123	0.394	0.258	0.3752	0.5035	0.2637	0.3224	0.3022	0.1602	0.1909	0.3366	0.3346	0.2998	0.1909	0.519	0.3072	0.5678	0.354	0.4475	0.114	0.4197	0.2166	0.3047	0.1974	0.2209	0.4666	0.2003	0.1979	0.3556	0.3366	0.5666	0.2254	0.5448	0.3012	0.3309	0.3201	0.4454	0.3066	0.2775	0.2745	0.3435
KIF1B	602	AT	52.2			0	1	0.683	0.1123	0.606	0.742	0.6248	0.4965	0.7363	0.6776	0.6978	0.8398	0.8091	0.6634	0.6654	0.7002	0.8091	0.481	0.6928	0.4322	0.646	0.5525	0.886	0.5803	0.7834	0.6953	0.8026	0.7791	0.5334	0.7997	0.8021	0.6444	0.6634	0.4334	0.7746	0.4552	0.6988	0.6691	0.6799	0.5546	0.6934	0.7225	0.7255	0.6565
KIF1B	604	AA	52.1	51	52.2	0	1	0.0367	0.0037	1	1	1	1	1	1	1	1	1	1	1	1	1	1	1	1	1	1	1	1	1	1	1	1	1	1	1	0.9796	1	1	1	1	1	1	1	1	1	1	1	1
KIF1B	606	ES	00:16:17.100000	15	17.2	0	0.7574	1	0.0918	0.1052	0.0437	0.088	0	0.1947	0.1236	0.0406	0.011	0.0957	0.1014	0.0502	0	0.0406	0.078	0.0243	0.0514		0.1236	0.0877	0	0		0.0898	0.057	0	0.1152	0.0502	0.0449				0.0502			0.0293				0.1014
PGD	610	ES	4	3.2	5	0	1	0.0638	0.0074	0.9835	0.9898	0.9946	0.9878	0.9911	0.9897	0.9756	0.9947	0.98	0.9896	0.9886	0.9916	0.9925	0.9957	0.9935	0.9915	0.9959	0.9956	0.9863	0.9826	0.9929	0.9868	0.9871	0.9847	0.9828	0.9871	0.9893	0.9917	0.9905	0.9955	0.9891	0.9945	0.9805	0.9964	0.9945	0.9908	0.992	0.9922	0.9912	0.9881
PGD	611	AA	3.1	2	3.2	0	0.9965	0.0606	0.0087	0.0084	0.0031	0	0.003	0.007	0.0037	0.0071	0.0008	0	0.0097	0.0106	0.004	0	0.0076	0	0.0024	0	0.0012	0.002	0.0025	0	0	0.0033	0.0139	0.0076	0.0011	0	0.0056	0.0098	0.0068	0	0.0087	0	0	0.0024	0.0043	0.0062	0.0077	0.0026	0.0127
PGD	612	AD	1.2	1.1	2	0	0.993	0.0442	0.0027	0	0	0	0	0.0013	0.0006	0	0.0008	0.01	0	0.0009	0.0003	0	0.0023	0	0.0013	0	0.0001	0	0.0007	0	0	0.0009	0	0.0007	0	0	0.0007	0.0007	0	0	0.0012	0	0	0.0003	0	0	0	0	0
APITD1	613	AT	6			0	1	0.246	0.0309	0.0471	0.0773	0.0328	0.0506	0.0498	0.0702	0.1389	0.0532	0.0496	0.071	0.0874	0.0324	0.0384	0.0805	0.0163	0.0389	0.0391	0.0714	0.0624	0.0474	0.0893	0.05	0.0908	0.0903	0.0478	0.0864	0.045	0.0497	0.0454	0.0205	0.0487	0.0254	0.0381	0.0637	0.0541	0.0455	0.0343	0.0668	0.0675	0.0416
APITD1	614	AT	5			0	1	0.246	0.0309	0.9529	0.9227	0.9672	0.9494	0.9502	0.9298	0.8611	0.9468	0.9504	0.929	0.9126	0.9676	0.9616	0.9195	0.9837	0.9611	0.9609	0.9286	0.9376	0.9526	0.9107	0.95	0.9092	0.9097	0.9522	0.9136	0.955	0.9503	0.9546	0.9795	0.9513	0.9746	0.9619	0.9363	0.9459	0.9545	0.9657	0.9332	0.9325	0.9584
DFFA	616	AT	5.3			0	1	0.5	0.0788	0.2519	0.2959	0.3882	0.2465	0.2797	0.5047	0.3853	0.1498	0.4114	0.3986	0.4209	0.3741	0.4376	0.2711	0.2504	0.211	0.362	0.3924	0.1881	0.4007	0.3772	0.3306	0.2389	0.2603	0.4128	0.4479	0.3552	0.3568	0.3872	0.3753	0.4132	0.3815	0.4598	0.4447	0.3144	0.5294	0.356	0.233	0.3052	0.2857
DFFA	617	AT	6			0	1	0.5	0.0788	0.7481	0.7041	0.6118	0.7535	0.7203	0.4953	0.6147	0.8502	0.5886	0.6014	0.5791	0.6259	0.5624	0.7289	0.7496	0.789	0.638	0.6076	0.8119	0.5993	0.6228	0.6694	0.7611	0.7397	0.5872	0.5521	0.6448	0.6432	0.6128	0.6247	0.5868	0.6185	0.5402	0.5553	0.6856	0.4706	0.644	0.767	0.6948	0.7143
DFFA	618	AD	5.2	5.1	6	0	0.9686	0.1644	0.0346	0	0.0663	0	0	0	0	0	0.0335	0.1195	0.0327	0	0.0247	0	0	0	0	0	0.0714	0.034	0	0.0283	0	0	0.0561	0.0692	0.0662	0	0.0567	0	0	0	0	0	0.1482	0.0209	0.0173	0.026	0.0789	0.0839	0
DFFA	619	ES	4	3	5.1	0	1	0.0934	0.0137	0.9913	0.985	0.9679	0.9944	0.9902	0.9914	0.9784	0.9983	1	0.991	0.9883	0.9913	1	1	0.9821	0.9901	0.9787	0.9852	0.9976	0.9945	1	0.9745	1	0.9951	1	0.982	0.972	0.9958	1	1	0.9909	0.9943	0.9809	1	0.9927	0.9712	0.9796	0.9772	0.9856	1
PEX14	620	ES	3	2	4	0	0.9983	0.0804	0.0073	1	1	1	1	1	1	1	1	1	1	1	0.9936	1	1	0.9655	1	1	1	0.9894	1	1	1	1	1	1	1	1	1	1	1	0.9763	1	1	1	1	1	1	1	1	1
CASZ1	621	AT	16.2			0	1	0.9065	0.1391	0.4694	0.6495	0.5505	0.5246	0.3898	0.3691	0.5202	0.5309	0.4822	0.4144	0.4189	0.4134	0.4065	0.3969	0.2225	0.4903	0.4122	0.4979	0.5274	0.5875	0.3161	0.6435	0.4206	0.5222	0.4316	0.4789	0.3631	0.3595	0.67	0.4884	0.3895	0.7408	0.307	0.5522	0.471	0.6851	0.9048	0.412	0.6347	0.4591
CASZ1	622	AT	21			0	1	0.9065	0.1391	0.5306	0.3505	0.4495	0.4754	0.6102	0.6309	0.4798	0.4691	0.5178	0.5856	0.5811	0.5866	0.5935	0.6031	0.7775	0.5097	0.5878	0.5021	0.4726	0.4125	0.6839	0.3565	0.5794	0.4778	0.5684	0.5211	0.6369	0.6405	0.33	0.5116	0.6105	0.2592	0.693	0.4478	0.529	0.3149	0.0952	0.588	0.3653	0.5409
TARDBP	629	RI	7.5	7.4	7.6	0	1	0.0683	0.0073	0.9924	0.9985	1	0.9919	0.9971	0.9877	0.9966	0.988	0.9923	0.9944	0.9947	0.9903	0.9983	1	1	0.996	1	0.9892	0.9798	0.9968	1	0.9963	0.997	0.9925	0.9967	0.9921	0.9961	0.9911	0.9933	0.9757	1	0.9734	0.9869	1	1	0.9874	0.9795	0.9871	0.9954	1
TARDBP	630	RI	7.3	7.2	7.4	0	1	0.0267	0.0042	1	0.998	0.9979	0.9969	0.9883	0.992	0.9954	0.9982	1	0.9918	0.9987	0.9955	0.9862	1	1	0.9952	1	0.9925	0.998	1	1	1	0.996	0.9977	1	0.9965	0.9949	0.9985	0.9914	1	1	0.9747	1	1	0.9973	0.9909	1	1	0.9981	1
TARDBP	631	RI	7.2:7.3	7.1	7.4	0	1	0.0309	0.0041	1	0.9921	1	0.9984	0.9922	0.9973	1	0.9948	1	0.9973	1	0.997	0.9977	1	1	0.9905	0.9957	0.9951	0.996	0.9978	0.9976	1	0.998	0.9977	1	0.9966	1	0.997	1	1	1	0.9915	1	1	1	0.9735	0.9912	1	0.9981	0.9964
TARDBP	633	ES	03:04:00	2	5	0	1	0.3412	0.0433	0.9834	0.935	0.8782	0.9845	0.9429	1	1	1	1	0.9494	0.9521	0.9524	1	0.9572	1	0.9685	0.9443	0.9722	0.9249	0.9412	1	1	1	0.8776	0.9528	0.9405	0.7632	0.9695	1	1	0.8693	1	1	1	1	1	1	1	0.9689	1
TARDBP	634	ES	4	2	5	0	1	0.1966	0.0102	0.9973	0.9955	0.9899	0.9977	0.9952	1	1	1	1	0.9964	0.9927	0.9958	1	0.994	1	0.9977	0.9929	0.9966	0.9919	0.988	1	1	1	0.9879	0.9968	0.9954	0.977	0.9955	1	1	0.9872	1	1	1	1	1	1	1	0.9974	1
TARDBP	635	ES	3	2	4	0	1	0.739	0.0949	0.1723	0.0801	0.0888	0.1595	0.094	0.1199	0.1237	0.0729	0.131	0.0824	0.1625	0.1007	0.0545	0.1495	0.1202	0.0859	0.1418	0.1379	0.1193	0.2056	0.0931	0.0614	0.1295	0.1026	0.0774	0.0893	0.0909	0.1614	0.0881	0.1176	0.105	0.0476	0.0678	0.0833	0.1152	0.0316	0.0806	0.1026	0.0973	0.1956
MASP2	636	AT	12			0	0.9668	0.7358	0.0635	1	1	1	0.9334	1	1	1	1	1	0.9716	0.9516	1	1	1	1	1	1	0.7972	1	1	1	1	1	1	1	0.9682	1	1		1	1	1		1	1			0.6723	1	1
MASP2	637	AT	5			0	0.9668	0.7358	0.0635	0	0	0	0.0666	0	0	0	0	0	0.0284	0.0484	0	0	0	0	0	0	0.2028	0	0	0	0	0	0	0	0.0318	0	0		0	0	0		0	0			0.3277	0	0
SRM	640	AA	2.1	1	2.2	0	0.9948	0.2115	0.0324	0.0453	0.0539	0.06	0.0504	0.0509	0.0559	0.0417	0.0556	0.0668	0.0319	0.0554	0.0565	0.026	0.0821	0.076	0.0761	0.0446	0.0589	0.0543	0.0831	0.0241	0.0736	0.074	0.1387	0.0955	0.0648	0.0486	0.0584	0.0555	0.0821	0.0329	0.0682	0.0689	0.0522	0.0361	0.0473	0.0609	0.1387	0.0619	0.0763
EXOSC10	643	ES	18	17	19	0	1	0.0297	0.0056	0.9957	0.9906	0.9958	0.9933	1	1	1	0.9919	0.9875	0.9906	0.9931	1	1	1	1	1	1	0.9973	1	0.9934	1	1	0.9959	0.9948	0.995	0.9949	1	0.9964	0.9816	1	1	1	1	1	1	1	0.9963	1	0.9938	0.994
EXOSC10	644	RI	16.4	16.3	16.5	0	1	0.8736	0.096	0.2107	0.1255	0.0673	0.1447	0.1291	0.0665	0.0529	0.0586	0.1189	0.1741	0.1478	0.076	0.0283	0.1467	0.1309	0.0442	0.0637	0.0548	0.1073	0.2064	0.065	0.1074	0.1147	0.128	0.0546	0.0831	0.1043	0.1637	0.0337	0.0997	0.0701	0.0574	0.0573	0.0426	0.1115	0.0344	0.0714	0.0577	0.0492	0.0769
EXOSC10	645	RI	16.2	16.1	16.3	0	1	1	0.0901	0.1388	0.0895	0.0296	0.141	0.0973	0.0603	0.0505	0.0442	0.1886	0.2039	0.1544	0.0465	0.0085	0.0995	0.1427	0.0278	0.0631	0.0442	0.0829	0.18	0.0405	0.0606	0.1338	0.0895	0.0578	0.0996	0.0732	0.13	0.0472	0.0931	0.0448	0.0824	0.0724	0.0213	0.1349	0.014	0.0384	0.0401	0.0323	0.0681
EXOSC10	647	ES	4	3	5	0	1	0.8065	0.1246	0.363	0.3098	0.3538	0.5085	0.4695	0.375	0.3478	0.395	0.5752	0.5294	0.3757	0.4049	0.4444	0.4595	0.4599	0.2827	0.4589	0.4151	0.3697	0.4948	0.3885	0.3243	0.3505	0.3189	0.5251	0.3841	0.6819	0.5247	0.3646	0.3721	0.3548	0.1704	0.2458	0.3204	0.4149	0.2072	0.3297	0.4118	0.296	0.406
MTOR	648	AP	1			0	0.822	1	0.1992	0.5483	0.8709		0.8653	0.6315	1		0.983	0.9011	0.8852	0.7812	0.874	0.9883	0.8296	0.9128	0.9893	0.8653	0.972	0.9025	0.7867	0.9463		0.874	0.8852	0.794	0.7645	0.9473	0.7296			0.9391	0.9536			0.7839				0.9455	0.9586
MTOR	649	AP	39.1			0	0.822	1	0.1992	0.4517	0.1291		0.1347	0.3685	0		0.017	0.0989	0.1148	0.2188	0.126	0.0117	0.1704	0.0872	0.0107	0.1347	0.028	0.0975	0.2133	0.0537		0.126	0.1148	0.206	0.2355	0.0527	0.2704			0.0609	0.0464			0.2161				0.0545	0.0414
UBIAD1	650	AT	3			0	1	0.2816	0.0327	0.0427	0.0336	0.0406	0.0742	0.0329	0.0648	0.0838	0.0359	0.0675	0.0967	0.0442	0.0376	0.0113	0.0548	0.0717	0.0712	0.0163	0.0407	0.0907	0.0713	0.0872	0.0581	0.0306	0.0344	0.0265	0.0637	0.0069	0.0512	0.0936	0.1404	0.059	0.1193	0.0398	0.0285	0.0098	0.0369	0.0812	0.0377	0.0419	0.031
UBIAD1	651	AT	2			0	1	0.2816	0.0327	0.9573	0.9664	0.9594	0.9258	0.9671	0.9352	0.9162	0.9641	0.9325	0.9033	0.9558	0.9624	0.9887	0.9452	0.9283	0.9288	0.9837	0.9593	0.9093	0.9287	0.9128	0.9419	0.9694	0.9656	0.9735	0.9363	0.9931	0.9488	0.9064	0.8596	0.941	0.8807	0.9602	0.9715	0.9902	0.9631	0.9188	0.9623	0.9581	0.969
FBXO44	654	AP	1			0	0.9564	0.4555	0.0691	0.2805	0.4053	0.1473	0.0972	0.1987	0.1789	0.0652	0.1269	0.1433	0.1048	0.1394	0.1242	0.1224	0.0809	0.1858	0.1224	0.0851	0.1691	0.0861	0.1529	0.1224	0.1375	0.1891	0.1004	0.181	0.1332	0.0851	0.206	0.0271	0.1375	0.1824	0.0528		0.1568	0.1992	0.1877	0.1328	0.1375	0.1224	0.1359
FBXO44	655	AP	2			0	0.9564	0.4555	0.0691	0.7195	0.5947	0.8527	0.9028	0.8013	0.8211	0.9348	0.8731	0.8567	0.8952	0.8606	0.8758	0.8776	0.9191	0.8142	0.8776	0.9149	0.8309	0.9139	0.8471	0.8776	0.8625	0.8109	0.8996	0.819	0.8668	0.9149	0.794	0.9729	0.8625	0.8176	0.9472		0.8432	0.8008	0.8123	0.8672	0.8625	0.8776	0.8641
FBXO44	656	AD	5.2	5.1	6	0	0.9093	0.3993	0.0684	0.9786	0.8613	0.9411	0.9495	1	0.9531	0.9003	0.9508	0.8005	0.9547	1	0.9819	1	1	1	0.8186	1	0.9413	0.9783	0.8575	1	0.9454	0.9867	1	1	0.9674		0.9059	0.9346	1	0.943	0.9072		1	0.9275	1	1	1	0.9613	0.9634
FBXO44	657	ES	5.2:6	5.1	7	0	0.9913	0.7504	0.1131	0.7432	0.7571	0.815	0.6439	0.6862	0.6994	0.646	0.5658	0.7256	0.7417	0.601	0.6871	0.738	0.8404	0.6011	0.4621	0.809	0.8591	0.8033	0.7503	0.5841	0.6863	0.7534	0.843	0.5892	0.6745	0.7126	0.8124	0.6524	0.6312	0.7239	0.6649	0.5793	0.588	0.6611	0.8048	0.6851	0.4801	0.7477	0.7504
FBXO44	658	ES	6	5.1	7	0	0.8115	0.818	0.1682	0.0642	0.3495	0.2302	0.0968	0	0.1122	0.1738	0.0668	0.4105	0.1284	0	0.0411	0		0	0.1676		0.2937	0.0901	0.3468	0	0.1224	0.0426		0	0.0702		0.327	0.1222	0	0.1443	0.1834		0	0.1418	0	0	0	0.1173	0.1094
FBXO44	659	AA	3.1	2	3.2	0	0.8953	0.5945	0.0999	1	1	0.7828	1	1	0.8514	1	1	1	0.8196	0.8775	1	1	1	0.7106	1		0.9485	0.9258	1	0.5889		0.8458	1	1	0.8847		1	1	1	1	1		1	1	1	1	0.8514	1	1
FBXO44	660	ES	3.1:3.2	2	4	0	0.9651	0.9654	0.1527	0.3935	0.5754	0.4027	0.344	0.3915	0.1772	0.3646	0.1087	0.2344	0.2697	0.3194	0.1538	0.293	0.1606	0.158	0.303	0.223	0.3709	0.2914	0.3209	0.1497	0.0346	0.3239	0.3378	0.1526	0.2509	0.0873	0.4402	0.2177	0.249	0.1885	0.2001		0.386	0.0975	0.373	0.4277	0.4157	0.2524	0.1327
FBXO44	661	ES	3.2	2	4	0	0.7679	0.2287	0.0449	0			0	0	0.0381		0	0	0.0796	0.0563	0		0	0.0667	0		0.031	0.0317	0	0.1245	0	0.0758		0	0.0437	0	0	0	0	0	0			0	0	0	0.1039	0	0
MAD2L2	664	AD	7.2	7.1	8	0	0.9948	0.2099	0.025	0.0388	0.0472	0.0418	0.0622	0.0255	0.0427	0.0557	0.0449	0.1035	0.0345	0.0354	0.0557	0.0863	0.0729	0.0399	0.0488	0.0715	0.0617	0.0501	0.1023	0.0461	0.0316	0.0354	0.0339	0.0819	0.0619	0.0483	0.0494	0.0217	0.0371	0.0743	0.0464	0.1293	0.0821	0.0768	0.0348	0.0308	0.049	0.0462	0.0432
MAD2L2	665	ES	02:03:00	1	4	0	0.9878	0.9111	0.1814	1	0.6698	0.9205	0.7894	0.8516	0.9057	0.9323	0.9561	0.7749	0.8902	0.5383	0.9385	1	0.5158	1	0.8664	0.5189	0.9561	0.9484	0.7513	0.7034	1	0.9224	1	0.8722	0.5687	1	0.7193	0.8516	1	0.8436	1	1	1	0.8238	0.8459	0.9701	0.7031	0.9687	1
AGTRAP	666	AD	6.2	6.1	7	0	0.9948	0.2895	0.0384	0.8301	0.8308	0.7715	0.822	0.8405	0.8301	0.8313	0.8302	0.8108	0.7792	0.8201	0.8416	0.8297	0.8463	0.8836	0.805	0.878	0.8221	0.8315	0.9292	0.8404	0.8898	0.8506	0.8002	0.7966	0.8352	0.9094	0.841	0.8425	0.8475	0.8171	0.7381	0.8399	0.7713	0.8722	0.7929	0.7938	0.7938	0.7996	0.8342
AGTRAP	667	ES	4.1:4.2:5	3	6.1	0	0.9913	0.3792	0.0362	1	1	1	1	1	1	1	0.976	1	1	1	1	1	1	1	0.9562	1	0.9487	0.7814	1	1	1	1	1	0.9299	1	1	1	1	1	1	1	1	0.6208	0.9613	1	1	1	0.8564	1
AGTRAP	668	ES	4.2:5	3	6.1	0	0.9686	0.2858	0.0277	1	1	1	1	1	1	1	0.9891		1	1	1	1	1	1	0.966	1	0.9796	0.7692	1	1	1	1	1	0.9573	1	1	1	1	1	1	1	1	0.9656	0.9814	1	1	1	0.9473	1
AGTRAP	669	ES	5	3	6.1	0	0.9983	0.0135	0.0017	1	1	1	1	1	1	1	0.9985	1	1	1	1	1	1	1	0.9981	1	0.9984	0.9961	1	1	1	1	1	0.996	1	1	1	1	1	1	1	1	0.9965	0.9986	1	1	1	0.9976	1
AGTRAP	670	AA	4.1	3	4.2	0	0.9546	0.9437	0.1698	0.5935	0.6657	0.4252	0.3984	0.5757	0.2385	0.2335	0.3765	1	0.5982	0.4118	0.3122	0.344	0.5083	0.6079	0.5283	0.3677	0.3518	0.5925	0.6872	0.3114		0.4271	0.4227	0.4367	0.4443	0.4922	0.4085	0.2794	0.3925	0.1485	0.3962	0.6079	0.0793	0.3648	0.2328	0.3509	0.3351	0.3175	0.3152
AGTRAP	671	ES	4.1:4.2	3	5	0	1	0.6922	0.0697	0.0954	0.0812	0.0434	0.0931	0.1282	0.0454	0.0571	0.0856	0.2071	0.1525	0.2719	0.0683	0.0431	0.0925	0.1642	0.0636	0.1051	0.0428	0.021	0.0899	0.053	0.0408	0.0516	0.106	0.072	0.0851	0.1004	0.0855	0.0557	0.0341	0.0298	0.0728	0.0892	0.0084	0.0512	0.0272	0.1027	0.0928	0.0218	0.0435
AGTRAP	672	ES	4.2	3	5	0	0.9913	0.4789	0.0703	0.0786	0.0584	0.0748	0.1526	0.1156	0.1412	0.1684	0.1498	0	0.124	0.3678	0.152	0.0797	0.1166	0.1259	0.0671	0.1975	0.0884	0.0164	0.0547	0.1353	0.0249	0.0747	0.1517	0.1008	0.1169	0.1145	0.1291	0.1425	0.0683	0.1581	0.1247	0.0554	0.1104	0.0877	0.0922	0.1832	0.204	0.0531	0.1067
AGTRAP	675	ES	3:4.1:4.2	1	5	0	0.8761	0.6576	0.1267	1	0.6873	1	0.6632	1	0.8837	0.7959	0.9473	0.7637	0.9435	0.9596	0.9044	0.8869		1	0.8568	1	0.7911	0.5741	0.7536	0.6274		0.8198	0.8635	0.9424	0.8717		0.9152	0.848	1	0.4292	0.6996			1	0.8842	0.7401	1	0.5536	0.8867
AGTRAP	677	ES	00:03:04.200000	1	5	0	0.9372	0.4131	0.067	1	0.8267	1	0.9187	1	0.9749	0.9466	0.9799		0.9514	0.9805	0.9696	0.9564	1	1	0.9057	1	0.9262	0.5869	0.7057	0.8714		0.9591	0.935	0.9698	0.9367	1	0.9618	0.9583	1	0.9396	0.8623		0.9459	1	0.9707	0.8956	1	0.8211	0.9677
AGTRAP	679	ES	3	1	5	0	0.9965	0.0694	0.0074	1	0.9891	1	0.987	1	0.9964	0.9898	0.997	0.9824	0.9941	0.9902	0.9953	0.9964	1	1	0.9943	1	0.9939	0.9903	0.9807	0.9837	1	0.9971	0.9894	0.997	0.9929	1	0.9949	0.9939	1	0.9905	0.9822	1	0.9946	1	0.9976	0.9782	1	0.9906	0.9968
AGTRAP	680	ES	2	1	3	0	0.993	0.1755	0.0143	0.013	0.0709	0.0228	0.0071	0.0149	0.0027	0.0084	0.0043	0	0.0173	0.0072	0.0172	0.003	0.0079	0	0.0021	0	0.0424	0.0031	0.0052	0	0.0133	0.0064	0.0159	0.0024	0.0098	0.0317	0.002	0.0049	0.0122	0.0136	0.0034	0	0	0.0321	0.0039	0.0066	0.0164	0.0133	0.0109
MTHFR	682	AP	4.1			0	0.815	1	0.1663	0.8308	0.6411		0.7159	0.8949	0.6418	0.6334	0.7288	0.9328	0.2979	0.9623	0.6732	0.636	0.8704	0.8287	0.7582	0.8431	0.9556	0.9097	0.8354	0.8808		0.8704	0.6488	0.5733	0.7551	0.6684	0.5873			0.4019				0.8923		1		0.9039	0.6216
MTHFR	683	AP	1			0	0.815	1	0.1654	0.1692	0.3589		0.2841	0.1051	0.3582	0.3666	0.2712	0.0672	0.7021	0.0377	0.3268	0.3641	0.1296	0.1713	0.2418	0.1569	0.0444	0.0903	0.1646	0.1192		0.1296	0.3512	0.4267	0.2449	0.3316	0.4127			0.5981				0.1077		0		0.0961	0.3784
MTHFR	684	AP	2			0	0.815	0.2476	0.0196	0	0		0	0	0	0	0	0	0	0	0	0	0	0	0	0	0	0	0	0		0	0	0	0	0	0			0				0		0		0	0
CLCN6	686	AT	24			0	1	0.6565	0.0776	0.5459	0.7134	0.7295	0.7458	0.6844	0.7806	0.6565	0.772	0.6343	0.8123	0.5605	0.7891	0.829	0.6476	0.7384	0.7666	0.6635	0.699	0.7081	0.6348	0.7291	0.8391	0.748	0.697	0.7082	0.7979	0.7696	0.7092	0.6322	0.6798	0.7227	0.665	0.5917	0.7583	0.6265	0.6022	0.6775	0.7206	0.7045	0.8284
CLCN6	687	AT	23.2			0	1	0.0919	0.0143	0.0418	0.0231	0.0059	0.0093	0.0281	0.0042	0.0518	0	0	0.0078	0.0435	0.0065	0.0098	0.0136	0	0.0159	0	0.0116	0.0457	0.0143	0.0128	0	0.0032	0.0132	0.021	0.0094	0.0203	0.0042	0	0	0.019	0	0	0	0.0202	0.0366	0.0363	0	0.0165	0.0101
CLCN6	688	AT	6			0	1	0.6022	0.0741	0.4123	0.2635	0.2647	0.2449	0.2875	0.2153	0.2918	0.228	0.3657	0.1799	0.396	0.2044	0.1612	0.3388	0.2616	0.2175	0.3365	0.2894	0.2461	0.351	0.2581	0.1609	0.2488	0.2898	0.2709	0.1927	0.2101	0.2866	0.3678	0.3202	0.2583	0.335	0.4083	0.2417	0.3533	0.3612	0.2862	0.2794	0.279	0.1615
CLCN6	689	ES	13	12	14	0	0.9494	0.867	0.178	0.5358	0.4658	1	0.9158	0.7341	0.8028	0.7915	0.5993	0.6617	0.8893	0.6263	0.9132	0.8961	0.5946	0.7915	0.8881	1	0.5087	0.5203	0.7341	0.8177	0.7915	0.6083	0.6743	0.4914	0.8864	0.8881	0.8148	0.7072		1	0.4084	0.5471	0.7072	0.2761	1	0.5869		0.4753	1
CLCN6	690	ES	3	2	4	0	0.8586	0.1795	0.0129	1	1	1	1	1	1		1	1	1	1	1	1	1		1		1	1	1	1		1	1	1	1	1	1		1	1			1	1				1	1
KIAA2013	693	AT	2.2			0	1	0.1737	0.0208	0.0629	0.0615	0.0704	0.0384	0.0383	0.0419	0.0468	0.0122	0.1071	0.0524	0.0515	0.0259	0.0275	0.0522	0.0499	0.0262	0.0308	0.0226	0.0249	0.0701	0.0464	0.0503	0.0456	0.0495	0.0439	0.051	0.0393	0.044	0.0352	0.0405	0.0389	0.0481	0.0287	0.0114	0.0284	0.0389	0.023	0.0222	0.0141	0.0275
KIAA2013	694	AT	3			0	1	0.1737	0.0208	0.9371	0.9385	0.9296	0.9616	0.9617	0.9581	0.9532	0.9878	0.8929	0.9476	0.9485	0.9741	0.9725	0.9478	0.9501	0.9738	0.9692	0.9774	0.9751	0.9299	0.9536	0.9497	0.9544	0.9505	0.9561	0.949	0.9607	0.956	0.9648	0.9595	0.9611	0.9519	0.9713	0.9886	0.9716	0.9611	0.977	0.9778	0.9859	0.9725
PLOD1	695	ES	2	1	3	0	0.9965	0.4649	0.0474	0.1138	0.0651	0.0879	0.0462	0.0592	0.106	0.029	0.081	0.0653	0.0098	0.0273	0.0804	0.0636	0.0483	0.0428	0.0291	0.02	0.0902	0.059	0.025	0.1446	0.0628	0.0335	0.0491	0.029	0.0553	0.1068	0.0468	0.0923	0.0825	0.0611	0.0999	0.0228	0.0675	0.0698	0.0531	0.1187	0.005	0.0373	0.0653
MFN2	696	ES	2	1	3	0	0.9983	0.2093	0.032	0.9816	0.9656	0.9581	0.9547	0.9774	0.905	0.9574	0.9803	0.9825	0.9649	0.9289	0.9668	0.938	0.9543	0.9784	0.9836	0.9301	0.9625	0.9123	0.9557	0.9823	0.9404	0.9473	0.9464	0.9252	0.9266	0.9574	0.9501	0.9636	0.9814	0.9765	0.9714	1	0.9537	0.9576	0.9846	0.9806	0.8718	0.9547	0.9781
MIIP	697	ES	8	7	9	0	0.993	0.0391	0.0039	1	1	1	1	0.9891	1	1	1	1	1	1	1	1	1	1	1	1	1	1	1	1	1	1	1	0.9903	1	1	0.9966	1	1	1	1	1	1	1	1	1	1	0.997	1
TNFRSF1B	702	AT	5			0	1	0.0156	0.0008	0	0	0	0	0	0	0	0	0	0	0	0	0	0	0	0	0.0082	0	0	0	0	0	0	0	0	0	0	0	0	0	0	0	0	0	0	0	0	0	0	0
TNFRSF1B	703	AT	11			0	1	0.0156	0.0008	1	1	1	1	1	1	1	1	1	1	1	1	1	1	1	1	0.9918	1	1	1	1	1	1	1	1	1	1	1	1	1	1	1	1	1	1	1	1	1	1	1
PDPN	710	AP	1.1			0	0.9913	0.7067	0.0677	0.9333	1	0.9905	0.9726	0.9283	0.9628	0.9532	0.9745	1	0.9186	0.9308	0.9732	0.9307	0.9058	0.9477	0.8845	1	0.9452	0.9862	0.8645	0.9143	0.9407	0.9214	0.8814	0.9265	0.9865	1	0.9623	0.9878	0.8819	1	0.8234	1	0.9541	1	0.9547	0.8928	1	0.9491	0.9731
PDPN	711	AP	2			0	0.9913	0.6202	0.0354	0	0	0	0.0052	0.0402	0.0145	0.0336	0	0	0	0	0.0176	0.0141	0	0	0.0648	0	0.0096	0.007	0.076	0	0	0.0259	0	0	0	0	0.0112	0	0.1181	0	0	0	0	0	0	0	0	0.0123	0.0193
PDPN	712	AP	3.1			0	0.9913	0.7067	0.0595	0.0667	0	0.0095	0.0222	0.0315	0.0227	0.0132	0.0255	0	0.0814	0.0692	0.0092	0.0552	0.0942	0.0523	0.0507	0	0.0452	0.0068	0.0595	0.0857	0.0593	0.0527	0.1186	0.0735	0.0135	0	0.0264	0.0122	0	0	0.1766	0	0.0459	0	0.0453	0.1072	0	0.0386	0.0076
PDPN	713	AD	8.2	8.1	9	0	0.9686	0.6186	0.0807	0.7996	0.5297	0.6355	0.5502	0.5271	0.5876	0.6619	0.6562	0.3597	0.522	0.6152	0.6031	0.6438	0.592	0.5392	0.621	0.603	0.5262	0.5611	0.4382	0.7959	0.602	0.5655	0.4172	0.6309	0.6058	0.5672	0.6086	0.6549	0.5793	0.6429	0.636	0.6655	0.4684	0.6519	0.6084	0.5205	0.686	0.6419	0.5856
PDPN	714	ES	6	5	7	0	0.993	0.0597	0.0065	1	1	1	0.9976	1	0.9932	1	1	1	1	0.9926	0.9948	0.9921	1	1	0.971	1	0.995	0.9983	1	1	1	0.9946	1	1	1	1	1	1	1	1	1	1	0.9778	1	0.9851	1	1	1	0.9806
PDPN	717	AD	1.2	1.1	5	0	0.8901	0.1	0.0123	0	0	0	0.0027	0.0222	0.0081	0.0182	0		0	0.0091	0.003	0.0075	0	0	0	0	0.0049	0.0085	0	0.0164	0	0.0159	0.0222	0	0		0	0	0.0455	0	0.0189	0	0	0	0.0077	0.031		0.0178	0
PRDM2	721	AT	11			0	1	0.4276	0.0809	0.8762	0.8374	0.8431	0.771	0.8209	0.8941	0.7712	0.8913	0.7509	0.818	0.7139	0.8324	0.7884	0.8309	0.8337	0.8653	0.8135	0.8727	0.7731	0.8029	0.8365	0.5849	0.8585	0.8302	0.8099	0.8477	0.8263	0.787	0.7326	0.8341	0.8264	0.7578	0.781	0.8915	0.8765	0.8431	0.8136	0.7127	0.7807	0.6826
PRDM2	722	AT	13			0	1	0.4276	0.0809	0.1238	0.1626	0.1569	0.229	0.1791	0.1059	0.2288	0.1087	0.2491	0.182	0.2861	0.1676	0.2116	0.1691	0.1663	0.1347	0.1865	0.1273	0.2269	0.1971	0.1635	0.4151	0.1415	0.1698	0.1901	0.1523	0.1737	0.213	0.2674	0.1659	0.1736	0.2422	0.219	0.1085	0.1235	0.1569	0.1864	0.2873	0.2193	0.3174
PRDM2	723	ES	10	9	12	0	0.918	1	0.1839	0.9	0.9062	0.8271	0.9657	0.8598	0.6994	0.428	0.7011	0.7464	0.2694	0.8703	0.9407	0.7233	1	0.6779		1	0.503	0.8269	0.8134	1	1	0.7616	1	0.78	1	1	0.6481	0.7799	1	1	0.6908	1	0.8691	1	0.4838	0.6242	0.2325		0.72
PRDM2	724	ES	08:09:10	7	12	0	0.8255	1	0.3277	1	0.1479	0.1355	0.5323	0.3637	0.3092		0.0254	1	0.2091	0.2567	0.6609	0.3016	1	0.3355		1	0.084	0.0929	0.1514	0.3954		0.2053		0.1203	0.1249	0.197	0.6807	1		0.0814	0.1397	0.1294	0.3788	1		0.0399			1
PRDM2	725	ES	09:10:00	7	12	0	0.9127	0.8562	0.2064	1	0.5437	0.7506	0.6992	0.7095	0.8052	0.5875	0.3039	1	0.5784	0.8628	0.9321	0.8799	1	0.7233		1	0.3637	0.3452	0.474	0.6666	0.8848	0.8341	1	0.7707	0.5016	0.6549	0.9138	1	0.532	0.3347	0.4838	0.4447	0.8556	1	1	0.5424	0.3233		1
PRDM2	728	ES	8	7	9	0	0.8307	0.6814	0.1023	0.1991	0.145	0.0535	0.3548	0.203	0.1028	0.0485	0.0636	0.2136	0.1741	0.0595	0.1401	0.0604	0.0753	0.1792	0.1401	0.1864	0.1549	0.1888	0.1903	0.2683		0.055	0.0379	0.0449	0.1401	0.1196	0.1774	0.071	0	0.1692				0.2588	0	0.0353	0	0	0.2764
KAZN	733	AT	11.2			0	1	0.8366	0.1391	0.6372	0.6694	0.5723	0.6913	0.6576	0.8735	0.7308	0.735	0.6171	0.8896	0.516	0.7424	0.6583	0.6278	0.6926	0.7145	0.8539	0.8108	0.5488	0.4953	0.7695	0.6598	0.6422	0.6811	0.655	0.4973	0.4558	0.7675	0.5059	0.7078	0.7587	0.4251	0.7689	0.7713	0.8189	0.5091	0.3776	0.9225	0.6886	0.8655
KAZN	734	AT	18			0	1	0.8366	0.1391	0.3628	0.3306	0.4277	0.3087	0.3424	0.1265	0.2692	0.265	0.3829	0.1104	0.484	0.2576	0.3417	0.3722	0.3074	0.2855	0.1461	0.1892	0.4512	0.5047	0.2305	0.3402	0.3578	0.3189	0.345	0.5027	0.5442	0.2325	0.4941	0.2922	0.2413	0.5749	0.2311	0.2287	0.1811	0.4909	0.6224	0.0775	0.3114	0.1345
TMEM51	736	AP	2			0	0.9791	0.8626	0.161	0.2893	0.3039	0.235	0.2376	0.3198	0.6718	0.2803	0.5832	0.2182	0.5168	0.3734	0.3388	0.4906	0.3485	0.2712	0.3102	0.4322	0.2959	0.4066	0.5381	0.3508	0.3391	0.2355	0.2182	0.2028	0.2685	0.3258	0.388	0.2995	0.3681	0.4012	0.3367	0.7745	0.3583	0.2536	0.4623	0.6361		0.5982	0.574
TMEM51	737	AP	1			0	0.9791	0.8626	0.161	0.7107	0.6961	0.765	0.7624	0.6802	0.3282	0.7197	0.4168	0.7818	0.4832	0.6266	0.6612	0.5094	0.6515	0.7288	0.6898	0.5678	0.7041	0.5934	0.4619	0.6492	0.6609	0.7645	0.7818	0.7972	0.7315	0.6742	0.612	0.7005	0.6319	0.5988	0.6633	0.2255	0.6417	0.7464	0.5377	0.3639		0.4018	0.426
TMEM51	738	AA	5.1	4	5.2	0	0.9703	0.2388	0.0281	1	0.9668	0.993	0.9952	1	0.9364	0.9451	0.9679	0.9565	0.9699	0.968	0.9821	0.9929	0.9795	0.9613	0.9536	1	0.977	0.9751	0.9892	0.9606	0.9839	0.9537	1	0.9611	0.9777	0.971	0.9812	0.9795	0.9684	0.9478	0.9348	0.9487	0.9782	0.9546	0.9549	0.9435	1	0.99	0.9742
TMEM51	739	ES	3	2	4	0	0.8709	0.8459	0.1458	0.6248	0.585	0.7198	0.7675	1	0.6005	0.4177	0.7583		0.6607	0.5618	0.737	0.5407	1	0.5605	0.8627	0.6456	0.6376	0.6885	0.5811	0.6966	0.5573	0.7665	0.6403	0.8359	0.6186	0.5774	0.654	0.7612	0.5223	0.718	0.4505	0.7546	0.6987	1	0.6007	0.733		0.8065	0.8276
FHAD1	747	AT	15.2			0	0.9948	0.8761	0.2194	0.2134	0.0631	0.471	0.4511	0	0.3351	0.8349	0.7143	0.2754	0.189	0.54	0.4194	0.7318	0.5804	0.0707	0.2653	0.7429	0	0.4385	0.1865	0	0.2205	0.442	0.2586	0.1994	0.5078	0.4668	0.2128	0.5909	0.4745	0.4452	0.8442	0	0.6355	0.3325	0.223	0.5533	0	0.8457	0.1273
FHAD1	748	AT	34			0	0.9948	0.4126	0.0581	0	0.0958	0	0.0247	0	0	0	0	0	0	0	0	0	0	0	0	0	0	0	0	0	0.1689	0.0752	0.2641	0	0	0	0.0652	0	0	0	0	0	0	0	0.3386	0	0	0	0
FHAD1	749	AT	36			0	0.9948	0.8761	0.2226	0.7866	0.8412	0.529	0.5242	1	0.6649	0.1651	0.2857	0.7246	0.811	0.46	0.5806	0.2682	0.4196	0.9293	0.7347	0.2571	1	0.5615	0.8135	1	0.6106	0.4828	0.4773	0.8006	0.4922	0.5332	0.722	0.4091	0.5255	0.5548	0.1558	1	0.3645	0.6675	0.4384	0.4467	1	0.1543	0.8727
CASP9	758	AP	2			0	0.9825	0.2957	0.0486	1	0.9621	1	0.9674	1	1	1	0.9911	1	0.989	0.9447	0.9837	0.9821	1	1	1	0.9429	0.9748	1	0.8621	1	0.9305	0.9382	1	1	0.93	0.9113	0.964	1	1	1	1	1	0.9443	1	1	1	0.8008	0.9482	1
CASP9	759	AP	1			0	0.9825	0.2957	0.0486	0	0.0379	0	0.0326	0	0	0	0.0089	0	0.011	0.0553	0.0163	0.0179	0	0	0	0.0571	0.0252	0	0.1379	0	0.0695	0.0618	0	0	0.07	0.0887	0.036	0	0	0	0	0	0.0557	0	0	0	0.1992	0.0518	0
CASP9	760	RI	9.2	9.1	9.3	0	0.9948	0.2955	0.0271	0.0147	0.0109	0.0237	0.0138	0.0055	0	0.0092	0.0037	0.0131	0	0.0238	0.0044	0.0036	0.0066	0	0.0072	0.0407	0.0097	0	0.0319	0.0103	0	0.0108	0.0058	0	0.0052	0.0111	0.02	0.0042	0.0174	0.0086	0	0	0.0069	0.0028	0	0.0101	0	0.0136	0.0108
CASP9	761	ES	4:5:6:7	3.2	8	0	0.9983	0.5585	0.0523	0.9332	0.9527	0.9434	0.955	0.9794	0.9642	0.9404	0.99	0.9377	0.9528	0.9797	0.9791	0.9913	0.9769	0.9645	0.8653	0.8844	0.9708	0.9533	0.953	0.9702	1	0.9513	1	0.9346	0.8632	0.9437	0.9701	0.9016	0.9302	0.9306	0.9519	0.8582	1	0.9663	0.8475	0.9579	0.8688	0.8795	0.9681
CASP9	762	AD	3.2	3.1	4	0	0.9965	0.0348	0.0034	1	1	0.9816	1	1	1	1	1	1	1	1	1	1	1	1	1	1	1	1	1	1	1	1	1	1	1	1	1	1	1	1	1	1	1	1	1	1	1	1	1
DNAJC16	763	AT	13.3			0	1	0.2818	0.0414	0.1189	0.0739	0.0401	0.058	0.079	0.0791	0.0784	0.063	0.0958	0.0578	0.0804	0.0262	0	0.0622	0.0725	0.0303	0.0734	0.0374	0.058	0.0969	0.047	0.0241	0.0499	0.0311	0.0403	0.0801	0.1034	0.0652	0.1067	0.0475	0.1052	0.0647	0.1072	0.0148	0.0601	0.0268	0.018	0.067	0.0528	0.0359
DNAJC16	764	AT	16			0	1	0.2345	0.0233	0.0342	0.0158	0.0456	0.0161	0.0118	0.0336	0.0489	0.0262	0.0212	0.0318	0.0207	0.0118	0.017	0.0293	0.0301	0.016	0.0366	0.0155	0.0362	0.0473	0.0201	0.0681	0.0166	0.0155	0.0182	0.0327	0.0172	0.0246	0.0674	0.0277	0.035	0.043	0.0446	0.0123	0.0145	0.0292	0.0271	0.0056	0.0459	0.0254
DNAJC16	765	AT	15			0	1	0.4547	0.055	0.8469	0.9103	0.9143	0.9259	0.9092	0.8873	0.8727	0.9108	0.883	0.9103	0.8989	0.9621	0.983	0.9086	0.8974	0.9538	0.8899	0.9471	0.9058	0.8558	0.933	0.9078	0.9335	0.9533	0.9414	0.8872	0.8794	0.9102	0.8259	0.9248	0.8598	0.8923	0.8483	0.9728	0.9253	0.944	0.9549	0.9274	0.9013	0.9387
DNAJC16	766	AD	13.2	13.1	14	0	0.8342	0.3837	0.0509	0	0	0	0	0.1215	0		0.0497	0.0245	0	0.048	0.0543	0.0241	0	0	0	0	0	0.0507	0	0		0.0314	0	0	0	0	0		0.0579	0				0	0	0		0	0
PLEKHM2	767	ES	7	6	8	0	0.9965	0.75	0.119	0.9033	0.736	0.8449	0.8942	0.8574	0.7584	0.7141	0.8981	0.8388	0.6561	0.72	0.8269	0.8817	0.925	0.803	0.6976	0.8518	0.9259	0.5129	0.6408	0.8803	0.8368	0.6376	0.7007	0.7272	0.8217	0.7933	0.8184	0.6932	0.7811	0.7083	0.895	0.6691	0.6565	0.7953	0.5907	0.879	0.588	0.7095	0.8849
FBLIM1	768	AP	5.1			0	0.9389	0.5518	0.0865	0	0.1017	0	0.024	0	0.1066	0.0695	0	0.0898	0.0894	0	0	0.012	0	0	0	0.1184	0	0	0.0777	0.2394		0	0.0339	0	0.0274	0.0168	0	0.2226	0.2812	0.2449	0	0	0	0	0	0		0.286	0
FBLIM1	769	AP	3			0	0.9389	1	0.2919	1	0.1531	0.3606	0.17	0.1908	0.1855	0.2178	0.8819	0.1147	0.2646	0.4016	0.1692	0.0286	0.2558	0.2584	1	0.3297	0.4275	0.3349	0.2344	0.463		1	0.224	0.4084	0.2448	0.0273	0.3472	0.155	0.4567	0.2984	0.6354	0.0734	0.1107	0.8819	0.4306	0.6086		0.5807	0.7924
FBLIM1	771	AP	1			0	0.9389	1	0.3021	0	0.7452	0.6394	0.806	0.8092	0.7079	0.7127	0.1181	0.7955	0.646	0.5984	0.8308	0.9593	0.7442	0.7416	0	0.5519	0.5725	0.6651	0.688	0.2976		0	0.7421	0.5916	0.7278	0.9559	0.6528	0.6225	0.2621	0.4567	0.3646	0.9266	0.8893	0.1181	0.5694	0.3914		0.1333	0.2076
FBLIM1	772	AT	11			0	1	0.5112	0.0745	0.7185	0.8891	0.881	0.8322	0.7018	0.8428	0.7771	0.7606	0.6946	0.7692	0.7625	0.8236	0.8911	0.7232	0.7626	0.7306	0.8402	0.7826	0.8151	0.7047	0.8092	0.7453	0.7213	0.8237	0.8694	0.8255	0.8553	0.7438	0.7824	0.7957	0.8594	0.8269	0.8997	0.8908	0.629	0.8912	0.8249	0.8179	0.7455	0.7764
FBLIM1	773	AT	9.2			0	1	0.5112	0.0745	0.2815	0.1109	0.119	0.1678	0.2982	0.1572	0.2229	0.2394	0.3054	0.2308	0.2375	0.1764	0.1089	0.2768	0.2374	0.2694	0.1598	0.2174	0.1849	0.2953	0.1908	0.2547	0.2787	0.1763	0.1306	0.1745	0.1447	0.2562	0.2176	0.2043	0.1406	0.1731	0.1003	0.1092	0.371	0.1088	0.1751	0.1821	0.2545	0.2236
FBLIM1	774	ES	06:07:00	5.2	8	0	0.9965	0.1069	0.019	1	0.9882	0.9922	0.9931	0.9533	0.9903	1	0.9702	1	0.9904	0.9757	0.9848	0.9913	0.9643	0.9824	1	0.988	0.9593	0.9722	0.9623	1	1	1	0.9497	0.9949	0.9932	1	0.985	0.9566	0.9118	1	1	1	0.9847	0.9595	0.9727	0.9846	1	1	0.9372
FBLIM1	775	AA	4.1	3	4.2	1	0.8674	0.7606	0.1143	0.4466	0.3813	0.3693	0.4024	0.2602	0.3967	0.3424	0.518	0.6171	0.1535	0.3534	0.4341	0.5059	0.4916	0.4622	0.3672	0.4129	0.5417	0.3632	0.4622	0.4441		0.3453	0.4532	0.4682	0.4204	0.3559	0.4362		0.4916	0.6237	0.5801	0.4037	0.2789	0.3589	0.4504	0.3156		0.3362	0.5473
ZBTB17	778	AA	14.1	13	14.2	0	0.9825	0.4298	0.045	0.1195	0.1374	0.0652	0.0413	0.0823	0.1068	0.1061	0.0714	0.0992	0.09	0.0747	0.0393	0.1068	0.1061	0.1034	0.0388	0.139	0.0701	0.0665	0.073	0.0398	0.1247	0.0511	0.0984	0.0957	0.128	0.063	0.1344	0.063	0.1247	0.128	0.0429	0	0.0453	0.1162	0.0499	0.1736	0.0354	0.1097	0.1211
ZBTB17	779	RI	9.2	9.1	9.3	0	0.9808	0.5985	0.0964	0.1594	0.1115	0.0582	0.1843	0.1675	0.0742	0.077	0.1303	0.1005	0.0845	0.2712	0.0532	0.0335	0.1144	0.0752	0.047	0.0904	0.1477	0.1297	0.1993	0.0185	0.0315	0.2396	0.1199	0.0538	0.0958	0.1133	0.1173	0	0.0821	0.1517	0.1005	0.0382	0.0077	0.0481	0	0.1292	0.1353	0.1045	0.0821
ZBTB17	780	AA	5.1	4	5.2	0	0.9511	0.2316	0.0382	0.0511	0.0522	0	0.0125	0.0816	0	0.0299	0.0299	0	0	0.0637	0.0085	0	0	0	0	0	0.0183	0.0458	0.0252	0	0	0.0304	0.0278	0.0223	0.043	0	0.0346		0	0	0	0.0541	0	0.0404	0	0		0.0167	0.0385
ZBTB17	782	ES	4	3	5.2	0	0.9965	0.3441	0.0291	0.9703	0.9438	0.9332	0.984	1	1	1	0.9913	1	0.9884	0.9857	0.9856	1	0.9332	1	1	0.9678	0.9793	0.9208	0.9779	0.9754	1	0.9469	1	0.9307	0.9726	1	0.9778	0.8696	1	1	1	1	1	1	0.9523	1	1	1	1
ZBTB17	784	ES	3	2	4	0	1	0.1681	0.0223	1	0.9561	1	0.9783	0.9766	1	1	0.9883	1	1	0.9817	1	1	1	1	0.9815	0.9455	0.9863	0.9654	0.947	0.9674	1	0.966	1	1	0.9809	1	1	1	1	1	1	1	0.9567	1	1	1	1	1	1
HSPB7	785	AP	1			0	0.8726	0.7447	0.1736	0.501	0.3337	0	0.0664	0.2979	0	0.3572	0	0.4295	0.2941	0.0324	0.0224	0	0.2941	0.3017		0.2527	0	0.1394	0.2037	0.1	0.1502	0.2905	0	0.0987	0.4439		0.1026		0	0.2448		0	0.3366	0.0493	0			0	0
HSPB7	786	AP	2.1			0	0.8726	0.7447	0.1736	0.499	0.6663	1	0.9336	0.7021	1	0.6428	1	0.5705	0.7059	0.9676	0.9776	1	0.7059	0.6983		0.7473	1	0.8606	0.7963	0.9	0.8498	0.7095	1	0.9013	0.5561		0.8974		1	0.7552		1	0.6634	0.9507	1			1	1
HSPB7	787	AT	3			0	0.9983	0.2426	0.0197	0.1327	0	0	0	0	0	0	0	0	0	0	0	0	0	0	0	0	0	0	0	0	0	0	0	0	0	0	0	0	0	0	0	0	0	0	0	0	0	0	0
HSPB7	788	AT	5			0	0.9983	0.2426	0.0197	0.8673	1	1	1	1	1	1	1	1	1	1	1	1	1	1	1	1	1	1	1	1	1	1	1	1	1	1	1	1	1	1	1	1	1	1	1	1	1	1	1
SZRD1	802	RI	5.2	5.1	5.3	0	1	0.0114	0.0009	1	1	1	1	1	1	1	1	1	0.9992	1	1	0.9988	1	1	1	1	0.9987	1	1	1	1	1	1	1	1	1	1	1	1	1	1	1	1	1	0.9986	1	1	1	1
SZRD1	803	AA	4.1	3	4.2	0	0.993	0.6393	0.0818	0.6233	0.6408	0.669	0.5837	0.8033	0.6049	0.5966	0.6448	0.7875	0.5832	0.613	0.6139	0.622	0.6851	0.8834	0.6851	0.6445	0.656	0.6171	0.5739	0.7054	0.6255	0.6122	0.6061	0.7051	0.6813	0.6592	0.6369	0.6333	0.6469	0.6091	0.7742	0.5101	0.5781	0.6906	0.6704	0.628	0.3607	0.6377	0.6828
SZRD1	804	ES	2	1	3	0	0.9791	0.9065	0.089	0.0097	0.0144	0	0	0	0.0037	0.0076	0.0026	0	0.0018	0.0031	0	0.0025	0	0	0.0127	0	0.0033	0	0	0.0127	0	0	0	0	0.006	0.0064	0.0045	0	0	0	0	0.0127	0	0	0	0.0039	0.0175	0	0.0073
SZRD1	805	ES	02:03:00	1	4.1	0	0.9948	0.6662	0.0638	0.007	0.0067	0	0	0	0.0017	0.003	0.0012	0	0.0009	0.0014	0	0.0011	0	0	0.003	0	0.0011	0	0	0.0102	0	0	0	0	0.0028	0.0034	0.0017	0	0	0	0	0.0034	0	0	0	0.0015	0.0013	0	0.0034
SZRD1	806	ES	3	1	4.1	0	0.9913	0.6358	0.09	0.4844	0.4226	0.3965	0.3794	0.5378	0.3787	0.3364	0.3824	0.591	0.4165	0.3952	0.3825	0.3777	0.5368	0.6113	0.2634	0.3338	0.3178	0.4085	0.4339	0.5141	0.415	0.3657	0.4369	0.5144	0.3928	0.3971	0.3743	0.2813	0.3271	0.3761	0.3347	0.2785	0.3369	0.331	0.3519	0.3477	0.0891	0.5317	0.3872
SZRD1	807	ES	00:03:04.100000	1	4.2	0	0.9913	0.8502	0.0702	0.0087	0.009	0	0	0	0.0021	0.003	0.0011	0	0.0008	0.0014	0	0.0014	0	0	0.0026	0	0.0012	0	0	0.0135	0	0	0	0	0.003	0.0048	0.0019	0	0	0	0	0.0041	0	0	0	0.0014	0.0023	0	0.0079
SZRD1	808	ES	00:03:04.100000	1	4.2	0	0.993	0.6972	0.0982	0.5361	0.4945	0.4119	0.3935	0.5523	0.4272	0.3316	0.3667	0.5332	0.3887	0.3883	0.4001	0.4334	0.441	0.6459	0.2324	0.3953	0.3246	0.3679	0.4026	0.5799	0.335	0.3608	0.4229	0.4819	0.4061	0.4781	0.3885	0.295	0.4004	0.3566	0.3519	0.3148	0.4574	0.4159	0.3491	0.3254	0.1446	0.5875	0.5959
SZRD1	809	AA	4.1	1	4.2	0	0.9948	0.6056	0.0675	0.5488	0.5693	0.5132	0.5118	0.5116	0.5473	0.4916	0.4802	0.4385	0.4681	0.4897	0.5154	0.5546	0.4022	0.534	0.4555	0.5632	0.5049	0.4543	0.4649	0.5632	0.4123	0.4916	0.4827	0.4646	0.5109	0.5788	0.512	0.5137	0.5758	0.476	0.516	0.5405	0.6212	0.5871	0.4941	0.4723	0.6307	0.5535	0.6975
SZRD1	810	ES	02:03:00	1	4.2	0	0.9895	0.6037	0.0493	0.0051	0.005	0	0	0	0.0013	0.002	0.0006	0	0.0006	0.0009	0	0.0008	0	0	0.0011	0	0.0006	0	0	0.0055	0	0	0	0	0.0014	0.0024	0.001	0	0	0	0	0.0039	0	0	0	0.0008	0.004	0	0.0036
SZRD1	811	ES	3	1	4.2	0	0.9895	0.7603	0.0865	0.4085	0.3516	0.2552	0.3137	0.2299	0.3249	0.2489	0.2396	0.2334	0.3099	0.2836	0.293	0.3147	0.2638	0.1922	0.1209	0.2627	0.1994	0.263	0.3308	0.3629	0.2296	0.261	0.32	0.2777	0.2402	0.3188	0.2635	0.1932	0.2648	0.2601	0.1353	0.3036	0.3781	0.2397	0.2069	0.2204	0.2285	0.4443	0.4036
NECAP2	821	RI	9.3	9.2	9.4	0	1	0.0461	0.0072	0.9936	0.9934	0.9815	0.9777	0.9872	0.9927	0.9803	0.9863	0.991	0.9876	0.981	0.9817	0.9826	0.9861	0.9893	1	0.9673	0.9863	0.9842	0.9858	0.9943	0.987	0.9881	0.9898	0.9889	0.9901	0.9885	0.9768	0.9886	0.9883	0.9833	0.9901	0.9826	0.9882	0.9875	0.9777	0.9905	0.9782	0.9874	0.9814
NECAP2	822	RI	9.2:9.3:9.4	9.1	9.5	0	1	0.0378	0.0065	0.9948	0.9869	0.9911	0.9916	0.987	0.9893	0.984	0.9859	0.9807	0.9904	0.9829	0.99	0.9915	0.9906	0.988	0.9897	0.9919	0.9846	0.9869	0.9911	0.9932	0.983	0.9878	0.9936	0.9956	0.991	0.9935	0.9881	0.9915	0.9826	0.9867	0.982	0.9856	0.9749	1	0.9917	0.9931	0.9799	0.9879	0.986
NECAP2	823	ES	9.2:9.4	9.1	9.5	0	0.9686	0.8781	0.1823	0.5596	0.3438	0.6898	0.752	0.5234	0.4332	0.5738	0.5154	0.3206	0.5913	0.5434	0.6727	0.6923	0.615	0.4814		0.8102	0.4904	0.5911	0.6324	0.4529	0.4587	0.5182	0.6366	0.7468	0.5549	0.6598	0.6809	0.587	0.4329	0.5633	0.3824	0.5717	0.3265	1	0.7459	0.5978	0.5596	0.5369	0.6109
NECAP2	824	ES	8	7	9.1	0	1	0.0756	0.0125	0.9938	0.9887	0.971	0.9818	0.9879	0.9896	0.9658	0.9868	0.9748	0.9757	0.9687	0.983	0.9758	0.9488	0.9834	0.9836	0.9866	0.968	0.9715	0.9848	0.9853	0.9821	0.9686	0.9851	0.9872	0.9442	0.9749	0.9786	0.9754	0.9858	0.9715	0.9735	0.9718	0.9717	0.9625	0.9795	0.976	0.9901	0.983	0.9853
NECAP2	825	ES	6	5	7	0	1	0.4854	0.038	0.0159	0.0025	0.0085	0.0211	0.0091	0.0051	0	0.0084	0.0075	0.0186	0.0083	0.0093	0.0059	0.0135	0	0.033	0.0055	0.0066	0.0017	0.0152	0.0028	0.0036	0.0055	0.0105	0.0057	0.0069	0.0124	0.0239	0.0118	0.0057	0.003	0.002	0.0058	0	0.01	0.0042	0.0059	0.0242	0.0079	0.0049
NECAP2	826	ES	4	3	5	0	1	0.0731	0.0034	1	1	1	1	1	1	1	1	1	1	0.9987	0.9987	0.999	0.9937	1	1	1	1	1	1	1	1	0.9982	1	1	1	1	1	1	1	1	1	1	1	0.9977	1	1	1	1	1
NECAP2	827	ES	2	1.2	3	0	0.9965	0.0261	0.0026	1	1	1	1	1	1	1	1	1	0.9981	1	0.9983	0.9975	1	1	1	1	0.9977	1	1	1	1	1	1	1	0.9971	1	1	1	1	1	1	1	1	1	0.9966	0.9976	1	1	1
NECAP2	828	AD	1.2	1.1	2	0	0.993	0.0508	0.0058	1	1	1	0.9945	1	1	1	0.9933	1	0.9918	0.9975	1	0.998	1	1	1	1	0.9967	1	0.9952	1	1	1	0.9944	0.9964	0.9958	1	1	1	1	1	1	1	1	0.9916	0.9971	1	1	1	1
NBPF1	830	AP	1			0	0.9616	0.9289	0.1458	0.4589	0.5862	0.7865	0.7078	0.5478	0.6951	0.4209	0.4921	0.6291	0.8046	0.7949	0.7232	0.7359	0.7784	0.7528	0.6596	0.7772	0.5478	0.7194	0.599	0.7687	0.5478	0.7636	0.6054	0.6176	0.6895	0.6316	0.5971		0.4921	0.195	0.5478	0.3677	0.8715	0.4921	0.8135	0.6934		0.4609	0.8599
NBPF1	831	AP	3			0	0.9616	0.9289	0.1458	0.5411	0.4138	0.2135	0.2922	0.4522	0.3049	0.5791	0.5079	0.3709	0.1954	0.2051	0.2768	0.2641	0.2216	0.2472	0.3404	0.2228	0.4522	0.2806	0.401	0.2313	0.4522	0.2364	0.3946	0.3824	0.3105	0.3684	0.4029		0.5079	0.805	0.4522	0.6323	0.1285	0.5079	0.1865	0.3066		0.5391	0.1401
NBPF1	835	ES	25	24	26	0	0.9948	0.4684	0.0556	0.8899	0.9379	1	0.9731	1	0.9402	1	1	0.9565	1	0.9083	0.9826	0.981	0.9835	1	0.9584	0.9376	1	0.9576	0.8911	0.9273	1	0.9447	0.9853	0.9822	1	0.9739	0.9258	1	0.9448	0.9244	0.9223	1	0.9437	0.9896	0.9483	0.8159	1	0.8763	0.9746
NBPF1	836	ES	10:11:12:13:14:15	9	16	0	1	0.9027	0.1027	0.7172	0.8656	0.8418	0.9077	0.6588	0.826	0.6287	0.7784	0.6829	0.8751	0.7952	0.8725	0.9109	0.9118	0.8047	0.8194	0.8	0.7068	0.8571	0.8085	0.8786	0.8157	0.7718	0.9289	0.8135	0.95	1	0.836	0.4975	0.749	0.6594	0.6507	0.7055	0.8578	0.7874	0.8936	0.6187	0.5611	0.806	0.7944
MFAP2	839	AA	3.1	2	3.2	0	0.9529	0.4527	0.0648	0.8857	0.855	0.8353	0.8672	0.9457	0.8713	0.8349	0.8764	0.853	0.7668	0.8821	0.8642	0.8326	0.9098	0.853	0.8915	0.8688	0.8839	0.8441	0.8627	0.8286	0.8506	0.8994	0.7745	0.8444	0.8286	0.8855	0.8829	0.909	0.8627	0.853	0.7946	0.9464	0.8571	0.8713	0.8107	0.8052	0.8043	0.8818	0.6007
ATP13A2	840	ES	28	27	29	0	0.9913	0.1821	0.0263	0.9642	0.9591	0.9825	0.9341	0.9607	0.9892	0.9555	0.9889	0.943	0.9444	0.947	0.9501	0.9858	0.9365	0.9797	1	0.9746	0.969	0.979	0.9742	0.9831	0.9439	0.9357	0.9536	0.9059	0.9041	0.992	0.9898	1	0.9075	0.9798	1	1	0.986	0.9924	0.9589	0.9555	0.8788	0.947	0.9572
ATP13A2	841	ES	22	21	23	0	0.9965	0.1214	0.0144	0.9893	0.9881	1	0.9913	0.9889	0.9888	1	0.9927	0.9887	0.9936	0.9911	0.9946	0.9937	1	0.9833	1	1	1	0.9949	0.9737	0.9946	1	0.9834	0.9882	0.9866	1	0.9922	1	1	1	1	1	0.9714	1	0.9875	1	0.9897	1	0.9678	0.9735
ATP13A2	842	AD	5.2	5.1	6	0	0.9651	0.9213	0.0982	0.5735	0.4993	0.548	0.5728	0.4227	0.5024	0.514	0.5283	0.519	0.5358	0.5788	0.5763	0.5463	0.6733	0.4964	0.5617	0.3762	0.4792	0.5333	0.5617	0.4549	0.5277	0.5977	0.6142	0.5377	0.5164	0.6103	0.5533	0.4607	0.5875	0.5497	0.3742	0.5062	0.4718	0.5381	0.6007	0.8005	0.5617	0.566	0.6748
PADI2	843	AT	11.2			0	1	0.2781	0.0271	0	0.0053	0.0152	0	0	0	0	0	0	0.018	0.016	0.0073	0.0139	0.009	0	0.0771	0	0	0.0282	0.0065	0.003	0	0.0091	0	0.007	0	0.0212	0.0217	0	0.0424	0	0	0.0281	0.0202	0.0425	0	0.0331	0	0	0.0108
PADI2	844	AT	16			0	1	0.2781	0.0271	1	0.9947	0.9848	1	1	1	1	1	1	0.982	0.984	0.9927	0.9861	0.991	1	0.9229	1	1	0.9718	0.9935	0.997	1	0.9909	1	0.993	1	0.9788	0.9783	1	0.9576	1	1	0.9719	0.9798	0.9575	1	0.9669	1	1	0.9892
PADI2	845	ES	8	7	9	0	0.7557	0.1791	0.015	1	1	1	1	1	1		1		1	1	1	1	1	1	0.9413	1	1	1	1	1	1	0.989	1	1	1	1	1	1	1	1	1	1	1	1	1	1		1	1
PADI2	846	ES	05:06:00	4	7	0	0.8342	0.0601	0.0036	1	1	1	1	1	1		1		1	1	1	1	1	1	1	1	1	0.9399	1	1	1	1	1	1	1	1	1	1	1	1		1	1	1	1	1		1	1
PADI4	851	AT	17			0	0.993	0.903	0.1974	0.0893	0.2038	0.5318	0.1613	0.2535	0.5508	0.3084	0.2818	0	0.0401	0.277	0.3567	0.6468	0.0446	0	0.0936	0.5152	0.1737	0.3334	0.0702	0.4658	0	0.1554	0	0.5629	0.3622	0.0614	0.4646	0.5246	0.3705	0.5863	0.4952	0	0.7104	0.1294	0.5578	0.296	0.5508	0.5087	0.7672
PADI4	852	AT	4			0	0.993	0.903	0.1974	0.9107	0.7962	0.4682	0.8387	0.7465	0.4492	0.6916	0.7182	1	0.9599	0.723	0.6433	0.3532	0.9554	1	0.9064	0.4848	0.8263	0.6666	0.9298	0.5342	1	0.8446	1	0.4371	0.6378	0.9386	0.5354	0.4754	0.6295	0.4137	0.5048	1	0.2896	0.8706	0.4422	0.704	0.4492	0.4913	0.2328
RCC2	853	AP	2.1			0	0.9756	0.5574	0.0803	0.1247	0.0604	0	0.104	0	0.0376	0	0.0359	0.1011	0.1436	0.0512	0.06	0.0288	0.0851	0	0.2325	0	0	0.0532	0.0339	0.0326	0	0.1139	0.0983	0.0889	0.0408	0.0543	0.0532	0	0	0.0319	0.105	0.2357	0	0.0992	0.0688	0.1878	0	0	0
RCC2	854	AP	1			0	0.9756	0.5574	0.0803	0.8753	0.9396	1	0.896	1	0.9624	1	0.9641	0.8989	0.8564	0.9488	0.94	0.9712	0.9149	1	0.7675	1	1	0.9468	0.9661	0.9674	1	0.8861	0.9017	0.9111	0.9592	0.9457	0.9468	1	1	0.9681	0.895	0.7643	1	0.9008	0.9312	0.8122	1	1	1
ARHGEF10L	855	AP	1			0	0.8709	1	0.2225	0.501	0.512	0.4328	0.2497	0.5284	0.3856	0.5666	0.6496	0.9165	0.5896	0.432	0.48	0.3045	0.6107	0.5345	0.3095	0.3434	0.1817	0.7018	0.3909	0.5406	0.3663	0.6321	0.4751	0.5049	0.5168	0.1639	0.2817	0.0482	0.4396	0.3035	0.4849		0.6107	0.6136	0.238	0.3424		0.1401	0.216
ARHGEF10L	857	AP	4.1			0	0.8709	0.3684	0.0557	0.0712	0.0728	0.1318	0	0	0	0	0	0	0.049	0.0246	0.0865	0	0	0.0963	0	0	0.0655	0	0	0	0	0	0	0	0	0	0	0	0	0	0		0	0.1474	0	0		0.101	0
ARHGEF10L	858	AP	10			0	0.8709	1	0.2327	0.4278	0.4153	0.4355	0.7503	0.4716	0.6144	0.4334	0.3504	0.0835	0.3614	0.5435	0.4335	0.6955	0.3893	0.3691	0.6905	0.6566	0.7528	0.2982	0.6091	0.4594	0.6337	0.3679	0.5249	0.4951	0.4832	0.8361	0.7183	0.9518	0.5604	0.6965	0.5151		0.3893	0.239	0.762	0.6576		0.759	0.7839
ARHGEF10L	859	AT	22			0	1	0.308	0.0375	0.1122	0.0349	0.0466	0.0584	0.0077	0.0426	0.0144	0.0444	0.0769	0.0484	0.1228	0.0351	0.0191	0.0427	0.0197	0.0404	0.0099	0.0276	0.0749	0.0595	0.0061	0.0213	0.0246	0.0825	0.0156	0.0447	0.0305	0.0809	0.0798	0.0285	0.0398	0.1459	0.0452	0	0.0462	0.0439	0.0254	0.0479	0.067	0.0116
ARHGEF10L	860	AT	30			0	1	0.0569	0.0053	0	0	0	0	0	0	0	0	0	0.0031	0.0036	0	0.0307	0	0	0	0	0	0	0	0	0	0.0059	0	0	0	0	0	0	0	0	0	0	0	0	0	0	0	0	0
ARHGEF10L	861	AT	32			0	1	0.308	0.0381	0.8878	0.9651	0.9534	0.9416	0.9923	0.9574	0.9856	0.9556	0.9231	0.9485	0.8737	0.9649	0.9502	0.9573	0.9803	0.9596	0.9901	0.9724	0.9251	0.9405	0.9939	0.9787	0.9695	0.9175	0.9844	0.9553	0.9695	0.9191	0.9202	0.9715	0.9602	0.8541	0.9548	1	0.9538	0.9561	0.9746	0.9521	0.933	0.9884
ARHGEF10L	862	ES	18	17	19	0	0.9442	0.9133	0.1708	0.7	0.7713	0.6654	0.5431	0.6859	0.7128	0.8624	0.8933	0.9625	0.6692	0.6937	0.7754	0.7684	0.8802	0.8849		0.6448	0.7035	0.6659	0.8207	0.6771	0.3281	0.8103	0.9318	0.7341	0.7736	0.5126	0.7126	0.268	0.6811	0.6811	0.8849	0.7936	0.8474	0.791	0.6426	0.6203		0.5219	0.4278
ARHGEF10L	863	ES	14:15:00	13	16	0	0.993	0.0543	0.0059	1	1	1	0.9954	1	1	1	1	1	1	1	1	1	1	1	1	1	1	1	1	1	1	1	1	0.9696	1	1	1	1	1	1	1	1	1	1	1	1	1	1	1
ARHGEF10L	864	ES	8	7	9	0	0.815	0.1329	0.011	0.0084	0.0173	0	0.0047	0	0	0	0	0	0	0.0104	0	0	0.0121	0			0	0	0	0		0	0	0.0137	0	0	0		0	0	0	0	0	0	0	0		0	0
ALDH4A1	868	AP	1			0	0.7504	0.7148	0.0611	1	1	1	1	1	1	1	1		1	0.9846	1	1	1	1	0.9266		1	1	0.9266	1		1	0.8963	1	1	1	1	1	1	1			1	1	1	1		1	1
ALDH4A1	869	AP	2			0	0.7504	0.7148	0.0611	0	0	0	0	0	0	0	0		0	0.0154	0	0	0	0	0.0734		0	0	0.0734	0		0	0.1037	0	0	0	0	0	0	0			0	0	0	0		0	0
ALDH4A1	870	RI	16.2	16.1	16.3	0	1	0.0729	0.0079	1	1	1	1	1	1	1	0.9861	1	0.9855	1	0.9858	1	1	0.9839	1	1	1	1	1	1	0.9738	1	1	0.9917	1	1	0.966	1	1	1	1	1	1	1	1	1	1	1	1
ALDH4A1	871	ES	13	12	14	0	0.9878	0.2964	0.0346	1	0.9847	1	1	0.9688	0.9854	0.9401	0.9392	0.9255	0.9257	0.9832	0.9735	1	0.9629	0.9522	0.9775	1	0.9816	1	1	1	1	0.8966	0.9526	0.9667	0.9678	1	0.9791	1	1	0.9574	1	0.8364	1	1	1	1	1	0.8762	1
UBR4	872	AP	74.1			0	1	0.8793	0.1152	0.2021	0.2014	0.2014	0.2974	0.327	0.3542	0.0787	0.127	0.3105	0.0958	0.1132	0.2888	0.2034	0.3466	0.3618	0.0926	0.1747	0.1563	0.1083	0.3029	0.2825	0.4216	0.3686	0.2407	0.2301	0.1379	0.258	0.2611	0.112	0.205	0.1229	0.1033	0.1118	0.221	0.1998	0.0924	0.1888	0.406	0.1447	0.5823
UBR4	875	AP	103.1			0	1	0.8867	0.113	0.3498	0.2184	0.3204	0.3414	0.2922	0.1632	0.0952	0.3778	0.1867	0.5937	0.2608	0.2321	0.6149	0.1929	0.0648	0.1302	0.483	0.4457	0.1363	0.3946	0.086	0.092	0.2277	0.1509	0.3645	0.2711	0.2308	0.2775	0.7178	0.0756	0.4285	0.4568	0.6955	0.1667	0.3912	0.862	0.2969	0.1651	0.213	0.2342
UBR4	876	AP	86.1			0	1	0.7513	0.1434	0.3854	0.4496	0.4061	0.3254	0.3333	0.282	0.5921	0.3732	0.2709	0.2604	0.525	0.3593	0.0316	0.2107	0.2016	0.3788	0.1647	0.3593	0.6593	0.1948	0.1761	0.2226	0.1705	0.3088	0.2724	0.3603	0.2706	0.398	0.1702	0.5027	0.3216	0.2762	0.1557	0.1344	0.3562	0	0.4117	0.2396	0.3278	0.1416
UBR4	877	AP	1			0	1	0.7282	0.1258	0.0626	0.1306	0.0721	0.0357	0.0474	0.2006	0.234	0.122	0.2319	0.0501	0.101	0.1198	0.15	0.2498	0.3718	0.3985	0.1775	0.0387	0.0961	0.1077	0.4554	0.2638	0.2332	0.2995	0.133	0.2306	0.2406	0.0634	0	0.2167	0.1271	0.1637	0.0369	0.4779	0.0528	0.0455	0.1026	0.1893	0.3145	0.042
UBR4	878	AT	107			0	1	0.5024	0.0507	0.9477	0.9492	0.9667	0.9602	0.9366	0.9546	0.9664	0.9545	0.9425	0.9794	0.9516	0.9679	0.9662	0.9463	0.9402	0.9601	0.9803	0.9692	0.9671	0.9407	0.9608	0.9608	0.957	0.9489	0.9569	0.9625	0.95	0.9511	0.974	0.9345	0.9762	0.9414	0.9673	0.9841	0.9501	0.9567	0.9696	0.9606	0.9636	0.9452
UBR4	879	AT	78.6			0	1	0.5024	0.0507	0.0523	0.0508	0.0333	0.0398	0.0634	0.0454	0.0336	0.0455	0.0575	0.0206	0.0484	0.0321	0.0338	0.0537	0.0598	0.0399	0.0197	0.0308	0.0329	0.0593	0.0392	0.0392	0.043	0.0511	0.0431	0.0375	0.05	0.0489	0.026	0.0655	0.0238	0.0586	0.0327	0.0159	0.0499	0.0433	0.0304	0.0394	0.0364	0.0548
UBR4	880	ES	105	104	106	0	1	0.0928	0.0073	0.0126	0.0066	0	0.0067	0	0	0	0.0023	0	0.0037	0.0077	0	0.0024	0.0129	0.0084	0	0	0	0	0.0024	0	0	0	0.0044	0.0035	0.0144	0	0.0048	0	0	0	0	0	0	0.0086	0	0	0	0	0
UBR4	881	ES	94	93	95	0	1	0.2316	0.0212	0.9626	0.9936	0.9742	0.9688	0.9801	0.9591	1	0.9769	0.9849	0.9954	0.9926	0.9719	1	0.9575	1	0.964	1	0.9762	0.9962	0.9862	0.9871	0.9373	0.9943	1	0.9837	0.9872	0.991	0.9833	1	0.9501	0.968	1	1	1	0.9678	0.8951	0.987	1	0.9824	0.9786
UBR4	882	ES	90	89	91	0	1	0.0296	0.0024	1	1	1	1	1	1	1	1	1	1	1	1	1	1	1	1	1	1	0.9938	1	1	1	1	1	1	1	1	1	1	1	1	1	1	1	1	1	1	1	1	1
UBR4	883	RI	78.4	78.3	78.5	0	0.9372	0.7902	0.0661	0.0851	0.0263	0	0.0244	0.0135	0.0059	0.0061	0.0228	0.0123	0.02	0.0718	0.0072	0	0	0.0083	0.0114	0	0.0105	0.0157	0	0.0037	0.0255	0.012	0.0125	0.0183	0.0018	0	0.0467			0.0324		0		0	0	0		0.0025	0
UBR4	884	RI	78.2	78.1	78.3	0	0.9476	0.0901	0.005	0	0	0	0	0	0	0	0	0	0	0.0083	0	0	0	0	0	0	0.0082	0	0	0	0	0	0	0	0	0	0			0		0	0	0	0			0	0
UBR4	885	ES	60	59	61	0	0.9721	0.2914	0.0424	0.976	0.9843	0.9786	0.9238	0.9647	1	1	0.9229	0.9617	0.9046	0.964	0.9617	1	0.8857	1	0.9392	0.8686	1	0.9062	0.9365	0.9326	1	0.9688	0.9845	0.9173	0.9743	0.9823	0.9656	1	1	1	1	1	1	0.944	1	0.882		0.9001	1
UBR4	886	ES	54	53	55	0	0.8953	0.6304	0.0814	0.0727	0.1223	0.236	0.2213	0.1224	0.2989	0.2037	0.1308	0.1021	0.0631	0.1217	0.0524	0.0218	0.0875	0	0.1147		0.0817	0.1385	0.0851	0.1757	0.3901	0.1812	0.0996	0.0365	0.1288	0.1178	0.1021			0.0601		0.1457	0.0681	0.0209				0.1674	0.1275
UBR4	887	ES	50	49	51	0	0.836	0.2878	0.0287	0.0181	0	0	0	0.053	0	0	0.0262	0.0435	0	0	0	0.041	0	0	0.0335	0	0	0	0	0		0.0204	0	0	0	0	0			0		0		0				0
EMC1	891	AA	10.1	9	10.2	0	0.9599	0.5084	0.081	0.8484	0.8606	0.8334	0.7575	0.7861	0.8312	0.799	0.8031	0.8969	0.6972	0.6981	0.7946	0.8676	0.7668	0.7946	0.831	0.8672	0.8317	0.7605	0.6784	0.8961	0.78	0.8201	0.7946	0.665	0.8217	0.6712	0.8393	0.8713	0.8376	0.7014	0.6592	0.4916	0.7769	0.6074	0.6881	0.7077	0.6237	0.8836	0.9164
EMC1	893	ES	3	2.1	4	0	0.9948	0.1769	0.0153	1	1	0.9829	0.9673	1	1	0.9817	0.9859	1	0.9914	1	1	1	1	1	1	1	0.9905	0.9947	1	1	0.9213	1	1	0.9895	0.9971	1	1	1	1	1	0.9496	1	1	1	1	1	1	0.9904	1
EMC1	894	AD	2.2	2.1	3	0	0.986	0.5471	0.0412	0.0085	0.0045	0.004	0.0101	0.0158	0.0116	0	0	0.0232	0.0109	0.0259	0	0.0131	0.0193	0	0	0	0.0074	0.0104	0.0083	0	0	0.0225	0.0164	0.0228	0.0047	0.0066	0.019	0	0.0211	0.0136	0	0	0	0.0272	0	0.017	0.047	0	0
PQLC2	898	AA	4.1	3	4.2	0	0.9843	0.3807	0.0657	0.8368	0.8916	0.8978	0.9012	0.9595	0.8712	0.9173	0.9359	1	0.9155	0.868	0.9387	0.9517	1	0.9243	0.91	0.7997	0.8978	0.8541	0.8161	0.8987	0.9301	0.9058	0.9467	0.8672	0.8912	0.7564	0.9388	1	0.8773	0.9119	0.8161	0.9119	0.8773	0.9445	0.8011	0.8226	0.9301	0.8978	0.9617
PQLC2	899	ES	2	1.3	3	0	1	0.2174	0.0286	0.9482	0.9463	0.98	0.985	1	0.9888	0.9713	0.9376	1	0.9526	1	0.9774	0.9637	0.9706	1	0.9027	0.9215	0.9739	0.8655	1	0.956	0.9275	1	0.9194	0.9765	0.9577	0.9515	1	1	0.9204	1	1	0.918	0.973	1	0.8832	0.978	0.9143	0.9486	1
PQLC2	900	RI	1.2	1.1	1.3	0	0.9634	1	0.1406	0.2215	0.422	0.2492	0.2959	0.387	0.221	0.407	0.2259	0.1874	0.2978	0.2913	0.2886	0.111	0.5736	0.2478	0.3331	0.3741	0.1612	0.3873	0.3569	0.1612	0.0714	0.241	0.3284	0.4078	0.3553	0.1612	0.1398		0.4021	0.3388	0.5736		0.49	0.1777	0.4434	0.5044	0.5736	0.3117	0.2145
CAPZB	901	AP	1			0	1	0.6194	0.0456	0.9898	0.9886	0.9905	0.9781	0.9906	0.9964	0.9881	0.9981	0.9929	0.9947	0.9805	0.9944	0.9983	0.9892	0.9926	0.9939	0.9936	0.9839	0.9885	0.9949	0.9969	0.9941	0.9845	0.988	0.9909	0.9921	0.9958	0.9896	0.9888	0.9981	0.9856	0.9932	0.9925	0.9979	0.9962	0.9672	0.9544	0.9912	0.9937	0.9938
CAPZB	902	AP	2			0	1	0.6194	0.0456	0.0102	0.0114	0.0095	0.0219	0.0094	0.0036	0.0119	0.0019	0.0071	0.0053	0.0195	0.0056	0.0017	0.0108	0.0074	0.0061	0.0064	0.0161	0.0115	0.0051	0.0031	0.0059	0.0155	0.012	0.0091	0.0079	0.0042	0.0104	0.0112	0.0019	0.0144	0.0068	0.0075	0.0021	0.0038	0.0328	0.0456	0.0088	0.0063	0.0062
CAPZB	903	AP	4.1			0	1	0	0	0	0	0	0	0	0	0	0	0	0	0	0	0	0	0	0	0	0	0	0	0	0	0	0	0	0	0	0	0	0	0	0	0	0	0	0	0	0	0	0
CAPZB	906	ES	11	10	12	0	1	0.1389	0.0171	0.0301	0.0101	0.014	0.0246	0.0155	0.0067	0.0139	0.0044	0.0079	0.0051	0.0156	0.0096	0.0053	0.0269	0.0197	0.0069	0.0056	0.0095	0.0045	0.0184	0.0369	0.0116	0.015	0.0072	0.0124	0.0531	0.0068	0.0152	0.0025	0.0106	0.0128	0.0109	0.0059	0.0102	0.0091	0.0085	0.01	0.0043	0.0097	0.0417
CAPZB	907	ES	10:11:00	9	12	0	0.9442	0.5129	0.0928	0.8799	0.8563	0.9345	0.9478	1	1	0.8769	0.8045		0.9131	1	0.9524	0.7042	0.8574	1	0.7769	0.689	1	0.8136	1	1	1	1	0.6626	0.936	0.9727	1	0.9402		1	1	1		1	1	1	0.9341		1	0.9764
CAPZB	908	ES	10	9	12	0	1	0.0078	0.0011	0.9975	0.9989	0.9993	0.9992	1	1	0.9988	0.9995	1	0.9997	1	0.9997	0.9984	0.9974	1	0.9991	0.9989	1	0.9994	1	1	1	1	0.9978	0.9995	0.9991	1	0.9995	1	1	1	1	1	1	1	1	0.9994	0.9989	1	0.9992
CAPZB	909	ES	3	1	4.2	0	1	0.6832	0.0576	0.0031	0.0017	0.0008	0.0007	0.0009	0	0	0	0	0.0006	0.0004	0.0003	0	0	0.0007	0.0006	0	0	0.0003	0.0003	0	0	0.0002	0.0008	0.0006	0	0	0.0011	0	0.0004	0	0.0004	0.0013	0	0.0006	0	0	0.001	0	0
NBL1	911	AP	1			0	0.9721	0.5724	0.0678	0.2449	0.0399	0.1673	0.0416	0.0889	0.0215	0	0.009	0	0	0.037	0.0555	0.034	0.1028	0.0433	0	0.0487	0.0475	0.0207	0.0798	0	0.0772	0.0557	0.0301	0.0594	0.0711	0	0.1789	0	0.076	0.0351	0	0	0.0636	0	0	0.0176	0	0.0104	0.0533
NBL1	912	AP	2			0	0.9721	0.5724	0.0678	0.7551	0.9601	0.8327	0.9584	0.9111	0.9785	1	0.991	1	1	0.963	0.9445	0.966	0.8972	0.9567	1	0.9513	0.9525	0.9793	0.9202	1	0.9228	0.9443	0.9699	0.9406	0.9289	1	0.8211	1	0.924	0.965	1	1	0.9364	1	1	0.9824	1	0.9896	0.9467
TMCO4	913	AP	2			0	0.9791	0.9631	0.1345	0.6734	0.4046	0.5652	0.6871	0.4711	0.6305	0.6316	0.5049	0.4211	0.3589	0.4471	0.3917	0.2703	0.3115	0.3404	0.3323	0.2491	0.4631	0.4553	0.4274	0.4788	0.299	0.4534	0.302	0.4705	0.5084	0.3233	0.4897	0.6239	0.3323	0.4988	0.7542	0.6179	0.3323	0.4694	0.4692	0.5011	0.3989	0.5161	0.3528
TMCO4	914	AP	1			0	0.9791	0.9631	0.1345	0.3266	0.5954	0.4348	0.3129	0.5289	0.3695	0.3684	0.4951	0.5789	0.6411	0.5529	0.6083	0.7297	0.6885	0.6596	0.6677	0.7509	0.5369	0.5447	0.5726	0.5212	0.701	0.5466	0.698	0.5295	0.4915	0.6767	0.5103	0.3761	0.6677	0.5012	0.2458	0.3821	0.6677	0.5306	0.5308	0.4989	0.6011	0.4839	0.6472
TMCO4	915	RI	17.2	17.1	17.3	0	1	0.2651	0.0121	0.9917	1	1	1	1	1	1	1	1	0.9971	0.9918	1	1	1	1	1	1	1	1	0.9868	1	1	1	1	1	1	1	0.9931	1	1	1	1	1	1	0.9933	1	1	1	1	0.9904
TMCO4	916	ES	11	10	12	0	0.9895	0.3747	0.0467	0.9749	0.9636	0.9745	0.9729	0.9149	0.9657	0.9264	0.9276	1	0.9864	0.9888	0.9637	0.9569	1	0.9425	1	0.9414	0.9709	0.9796	0.9361	0.969	0.9384	0.9613	1	0.9389	0.9118	0.8914	0.9791	0.9152	0.9698	0.9829	0.9736	1	0.9407	0.9147	1	1	1	1	0.9669
TMCO4	917	ES	3	1	4	1	0.8482	0.8405	0.141	0.6155	0.5305	0.3904	0.4746	0.3279	0.6465	0.3562	0.5864	0.4201	0.4861	0.3738	0.5008	0.3781		0.564	0.7181	0.5425	0.5363	0.2894	0.5052	0.7212	0.4245	0.2833	0.4854	0.6987	0.5175	0.3355	0.2944		0.5917	0.4676			0.5989	0.4936	0.3193	0.7188	0.5131	0.4837	0.3502
VWA5B1	923	AT	15			0	1	0.6866	0.0901	1	1	0.9428	1	1	1	1	1	1	1	0.9066	0.9057	0.6339	1	0.974	1	1	1	1	0.9815	0.979	1	1	1	0.921	1	0.9597	1	1	1	1	1	0.7954	1	1	1	1	1	0.9643	0.9618
VWA5B1	924	AT	24			0	1	0.4659	0.0624	0	0	0.0572	0	0	0	0	0	0	0	0.0934	0.0943	0.3661	0	0.026	0	0	0	0	0.0185	0.021	0	0	0	0.079	0	0.0403	0	0	0	0	0	0.2046	0	0	0	0	0	0.0357	0.0382
VWA5B1	925	AT	20			0	1	0.3121	0.0409	0	0	0	0	0	0	0	0	0	0	0	0	0	0	0	0	0	0	0	0	0	0	0	0	0	0	0	0	0	0	0	0	0	0	0	0	0	0	0	0
DDOST	932	ES	2	1	3	0	1	0.0113	0.0013	0.9995	0.9985	1	0.9997	1	1	0.9992	0.999	1	0.9995	0.9995	0.9994	0.9995	1	1	1	0.995	0.9996	0.9999	0.9979	0.9994	1	0.9995	1	0.9995	0.9996	0.9985	1	0.9962	1	1	0.9991	0.9983	1	0.9995	0.9994	0.997	1	1	0.999
HP1BP3	936	AP	1			0	1	0.6947	0.1457	0.1297	0.3322	0.3775	0.3198	0.2486	0.1602	0.3763	0.389	0.259	0.3787	0.2195	0.4938	0.6143	0.1263	0.3742	0.462	0.3401	0.2745	0.28	0.2201	0.6258	0.5456	0.28	0.3176	0.3564	0.4856	0.2081	0.1972	0.4173	0.2396	0.4049	0.2652	0.5266	0.5411	0.2592	0.6243	0.4014	0.1667	0.3301	0.4972
HP1BP3	937	AP	7.1			0	1	0.7743	0.1674	0.8261	0.6156	0.4911	0.6585	0.7044	0.643	0.5004	0.3417	0.6831	0.5806	0.7131	0.4715	0.2851	0.8013	0.4946	0.3961	0.5644	0.6632	0.5869	0.7259	0.3127	0.3307	0.6264	0.6209	0.5958	0.4638	0.6751	0.7759	0.5345	0.7309	0.4727	0.679	0.4303	0.4106	0.7002	0.2981	0.451	0.7514	0.4117	0.2748
HP1BP3	938	AP	2			0	1	0.2693	0.0473	0.0441	0.0521	0.1314	0.0217	0.047	0.1968	0.1232	0.2693	0.0578	0.0407	0.0674	0.0347	0.1006	0.0724	0.1313	0.1418	0.0955	0.0622	0.1331	0.0541	0.0615	0.1237	0.0935	0.0615	0.0478	0.0506	0.1168	0.0269	0.0482	0.0294	0.1224	0.0558	0.0431	0.0483	0.0405	0.0776	0.1475	0.0819	0.2582	0.228
HP1BP3	939	AT	6			0	1	0.4489	0.0469	0.1325	0.0525	0.0342	0.0581	0.0622	0.0353	0.0444	0.0223	0.1452	0.0466	0.1154	0.0365	0.012	0.0882	0.0776	0.0461	0.0412	0.029	0.0732	0.0882	0.0335	0.0359	0.0532	0.1175	0.0204	0.0444	0.1047	0.086	0.1082	0.0374	0.045	0.0879	0.026	0.0196	0.0797	0.0075	0.0399	0.0491	0.0482	0.0083
HP1BP3	940	AT	15			0	1	0.4489	0.0469	0.8675	0.9475	0.9658	0.9419	0.9378	0.9647	0.9556	0.9777	0.8548	0.9534	0.8846	0.9635	0.988	0.9118	0.9224	0.9539	0.9588	0.971	0.9268	0.9118	0.9665	0.9641	0.9468	0.8825	0.9796	0.9556	0.8953	0.914	0.8918	0.9626	0.955	0.9121	0.974	0.9804	0.9203	0.9926	0.9601	0.9509	0.9518	0.9917
EIF4G3	941	AP	1			0	0.808	0.4663	0.0309	1	1	1	1	1	1	1	1		1	1	1		1	1	1	1	1	1	1	1	1	1	1	1	1	1	1	1	1	1	1	1	1	1	1	1		1
EIF4G3	945	AP	3			0	0.808	0.4663	0.0309	0	0	0	0	0	0	0	0		0	0	0		0	0	0	0	0	0	0	0	0	0	0	0	0	0	0	0	0	0	0	0	0	0	0	0		0
EIF4G3	948	AT	42			0	1	0.1524	0.0167	1	1	1	0.9923	1	1	1	0.992	1	1	0.9911	1	1	0.9835	1	0.991	0.9824	1	1	1	1	1	1	0.9851	0.9874	0.9925	1	1	1	1	1	1	1	1	1	1	0.9862	0.9832	1	1
EIF4G3	949	AT	18.2			0	1	0.1403	0.0149	0	0	0	0.0077	0	0	0	0.008	0	0	0	0	0	0.0165	0	0	0.0176	0	0	0	0	0	0	0.0082	0.0126	0.0075	0	0	0	0	0	0	0	0	0	0	0.0138	0.0168	0	0
EIF4G3	950	AT	22.2			0	1	0.0679	0.0053	0	0	0	0	0	0	0	0	0	0	0.0089	0	0	0	0	0.009	0	0	0	0	0	0	0	0.0068	0	0	0	0	0	0	0	0	0	0	0	0	0	0	0	0
EIF4G3	951	ES	23	22.1	24	0	0.9913	0.6769	0.1011	0.489	0.3662	0.2556	0.4044	0.3886	0.3412	0.3182	0.2989	0.4017	0.2263	0.2598	0.4625	0.2983	0.3882	0.4693	0.3719	0.1462	0.3943	0.4353	0.3903	0.2799	0.3988	0.4051	0.3904	0.2828	0.4744	0.433	0.3696	0.4075	0.3625	0.3432	0.2277	0.3066	0.2127	0.2682	0.6017	0.4241	0.5702	0.466	0.3709
EIF4G3	952	ES	18.1	17	19	0	0.9599	0.5139	0.0734	0.2061	0.0194	0.0342	0	0.0376	0.0125	0	0	0.0165	0.1128	0.025	0.0473	0.0408	0.0316	0.0334	0.0204	0	0.0612	0.0228	0.0593	0.0065	0	0.0599	0.0763	0.0596	0.0272	0.0316	0.0554		0	0.0213	0.0466		0	0.0788	0.0628	0		0.0188	0.1401
EIF4G3	954	ES	17	16.2	19	0	0.9965	0.1249	0.0106	1	0.9918	0.9862	0.9916	1	0.9815	0.9697	0.99	0.9848	0.9914	1	1	0.98	1	1	0.9561	1	1	1	1	1	1	0.994	1	1	1	1	1	1	1	0.9759	1	1	0.9369	1	0.8751	0.9166	0.8941	0.9776	1
EIF4G3	955	ES	16.1:16.2	15	17	0	0.9564	0.2017	0.033	0.954	1	1	1	1	1	1	0.975	1	1	1	0.9642	1	1	1	0.9789	1	1	1	0.9643	1	1	0.9775	0.9675	1	0.9699	1	1	1		1	1		1	1	1	1		0.9627	1
EIF4G3	956	ES	16.2	15	17	0	0.9651	0.2084	0.0305	0.9497	1	1	1	1	1	1	0.9749	1	1	1	0.981	1	1	1	0.9839	1	1	1	0.9701	1	1	0.9834	0.9855	1	0.9833	1	1	1	1	1	1	1		1	1	1		0.9707	1
EIF4G3	957	AA	16.1	15	16.2	0	0.9319	0.9063	0.1136	0.5253	0.4014	0.3709	0.3974	0.5558	0.4916	0.4462	0.5027	0.5687	0.3483	0.4178	0.3442	0.5301	0.4462	0.4129	0.4333	0.4362	0.4329	0.4532	0.4551	0.5675	0.6929	0.4246	0.3053	0.4604	0.3544	0.3849	0.4604	0.4916		0.5632				0.5211		0.492	0.4916	0.44	0.6171
EIF4G3	959	ES	11	9	12	0	0.7661	0.303	0.0167	0	0	0	0.028	0	0	0	0	0	0	0	0		0	0	0	0	0	0	0	0	0	0	0	0	0	0	0						0	0				0	0
EIF4G3	960	ES	10	9	12	0	0.8028	0.5669	0.0785	0.0393	0.1322	0.1093	0.0941	0.1852	0	0.284	0.053	0	0	0.0595	0.1168	0.2667	0.127	0	0.0453	0	0.2254	0.0966	0.1637	0.1006	0	0.0494	0.0174	0.1437	0.2197	0.053	0.1168						0.0678	0.127				0.0902	0.0833
ECE1	961	AP	1			0	0.9878	0.9514	0.1529	0.6072	0.6116	0.4399	0.6557	0.4395	0.6779	0.818	0.5262	0.259	0.7861	0.6662	0.622	0.5297	0.6006	0.5798	0.2931	0.4852	0.3099	0.6185	0.3485	0.6943	0.5158	0.7696	0.8164	0.5196	0.6968	0.3462	0.5504	0.4259	0.597	0.4107	0.3124	0.5778	0.4785	0.4717	0.5349	0.7572	0.7984	0.6598	0.5448
ECE1	962	AP	3.1			0	0.9878	0.5902	0.0581	0.1494	0.1103	0.1295	0.081	0.0874	0.0346	0.0415	0.1076	0.1966	0.056	0.0666	0.1427	0.1376	0.0725	0.1297	0.072	0.1053	0.1902	0.0488	0.1004	0.0709	0.1462	0.095	0.0648	0.0973	0.1042	0.1084	0.1117	0.2541	0.095	0.098	0.086	0.0363	0.1142	0.1501	0.091	0.0721	0.0913	0.0337	0.1026
ECE1	963	AP	2			0	0.9878	0.5721	0.0983	0.1895	0.198	0.2984	0.1941	0.3355	0.2299	0.0886	0.3264	0.2635	0.1333	0.2	0.2021	0.242	0.309	0.2704	0.5263	0.1683	0.4236	0.2498	0.4158	0.1146	0.2953	0.1046	0.0797	0.289	0.1618	0.4852	0.2362	0.1083	0.2025	0.3552	0.5379	0.1238	0.3311	0.128	0.2915	0.1189	0.0668	0.2158	0.248
ECE1	964	AP	4.1			0	0.9878	0.7226	0.0876	0.0539	0.0802	0.1322	0.0693	0.1376	0.0576	0.0519	0.0399	0.2809	0.0246	0.0672	0.0333	0.0908	0.0179	0.02	0.1086	0.2412	0.0763	0.0829	0.1354	0.1202	0.0427	0.0308	0.0392	0.0941	0.0372	0.0602	0.1017	0.2117	0.1055	0.1361	0.0637	0.2621	0.0761	0.2501	0.0826	0.0518	0.0435	0.0906	0.1045
ECE1	965	ES	19	18	20	0	1	0.0273	0.0039	0.9956	0.9941	0.9918	0.9983	1	1	1	1	0.9872	0.9988	0.9939	0.9992	0.9962	1	1	1	1	0.991	0.9953	1	1	0.995	0.9977	0.9991	0.9941	0.9926	1	0.9982	1	1	0.9905	1	1	1	1	1	1	1	0.9939	1
NBPF3	966	AD	12.3	12.2	13	0	0.9529	0.7387	0.1275	0.7958	0.8106	0.7416	0.8218	0.8295	1	0.6388	0.8414	0.5934	0.92	0.8969	0.8447	0.933	0.9541	0.9359	0.6388		0.8902	0.8569	0.6388	0.9028	1	0.9359	0.7796	0.7448	0.917		0.887	1	0.7558	0.7467	0.8609	0.8762	0.9522	0.8664	0.85	0.7173	1	0.7491	0.9253
NBPF3	967	AA	12.1	11	12.2	0	0.9738	0.7117	0.1142	0.2791	0.1624	0.1113	0.1724	0.1127	0.1901	0.0767	0.0251	0.0547	0.0389	0.0992	0.0792	0.0082	0.0337	0.16	0.2223	0.0632	0.014	0.0095	0.1365	0.1336	0.0489	0.0355	0.1313	0.1157	0.1432	0.0399	0.0826	0	0.0385	0.2126	0.2358	0.0371	0	0.0351	0.0268	0.0522	0	0.0177	0.0203
NBPF3	968	ES	3:4:5:6	2	7	0	0.9983	0.1794	0.0199	0.9589	1	1	1	1	1	1	1	1	1	1	1	1	0.9529	1	1	1	1	0.9592	1	1	1	1	1	0.9514	1	1	1	1	1	1	1	1	1	1	1	1	1	0.9362	1
NBPF3	970	ES	03:04:05	2	6	0	0.9948	0.3737	0.0455	1	0.9772	1	0.8697	1	0.829	1	0.8677	0.9406	0.9262	0.9348	0.8784	1	1	1	1	1	1	1	1	0.9026	1	0.9821	1	1	1	1	0.9238	1	0.8896	1	0.8407	1	1	0.9452	1	1	1	1	1
ALPL	972	AP	2			0	0.8709	0.7579	0.0676	0.0065	0	0	0	0.0154	0	0		0	0	0	0	0	0	0.0366	0	0	0	0.0063	0.3607	0	0	0	0	0.003	0	0.0181	0	0	0.0109	0			0	0	0		0	0	0
ALPL	973	AP	9.1			0	0.8709	0	0	0	0	0	0	0	0	0		0	0	0	0	0	0	0	0	0	0	0	0	0	0	0	0	0	0	0	0	0	0	0			0	0	0		0	0	0
ALPL	974	AP	11			0	0.8709	0.7827	0.1146	0.0521	0.0195	0.0894	0.0092	0.087	0.0258	0.0709		0.011	0.0292	0.1415	0.0677	0.0229	0.0212	0.2062	0.045	0.1008	0.0195	0.0104	0	0.0346	0.0038	0.0141	0.0332	0.0282	0.1108	0.0624	0.0434	0	0.0341	0.0074			0	0.0691	0.0137		0	0.042	0.0853
ALPL	975	AP	1			0	0.8709	0.8948	0.1413	0.9414	0.9805	0.9106	0.9908	0.8975	0.9742	0.9291		0.989	0.9708	0.8586	0.9323	0.9771	0.9788	0.7572	0.955	0.8992	0.9805	0.9833	0.6393	0.9654	0.9962	0.9859	0.9668	0.9688	0.8892	0.9195	0.9566	1	0.955	0.9926			1	0.9309	0.9863		1	0.958	0.9147
ALPL	976	ES	10	9.2	12	0	0.9843	0.0675	0.0043	0.9992	0.9951	1	0.9985	1	1	0.9923	1	1	1	1	0.9922	0.9984	1	1	1	1	1	0.9973	1	1	1	1	1	1	1	1	0.9977	1	1	1		1	1	0.9982	1	1	1	1	1
ALPL	977	ES	5	4	6	0	0.9651	0.0512	0.0053	0.9986	0.9971	1	1	0.9907	1	1	1	0.9906	1	1	1	1	1	1	1	1	1	0.9929	1	1	0.9959	1	1	1	1	1	0.9888	1	1	1			1	1	1	1	1	1	0.9967
ALPL	978	ES	3	1	4	0	0.9442	0.3006	0.0326	0.9833	0.9818	0.9664	0.9968	0.9866	1	0.9559	1	0.9387	0.9793	0.9399	0.9794	0.9774	0.9779	1	0.9741	0.9543	0.9279	0.9765	1	0.9871	0.9838	0.9714	1	0.9768	0.9882	0.9765	0.9685	0.7977	0.9619	0.9719		1	0.721	0.9961	1	0.7975	1	0.9572	0.9791
RAP1GAP	980	AP	1			0	0.7609	0.8571	0.1259		0.1445		0.3504	0.1899	0.0817	0.176		0	0.5443		0.1025	0.0153	0	0		0.2142	0	0.0284	0.2312	0.2351	0.1203	0	0	0	0.2569	0.1034	0.0469		0.1093	0.2255	0		0.1497	0.0132	0.1196	0.4239			0.0506
RAP1GAP	981	AP	3			0	0.7609	0.7469	0.1342		0.0872		0.2007	0.1522	0.1251	0.0706		0.3711	0.4085		0.2793	0.0368	0.2278	0.1384		0	0.2823	0.114	0.1179	0.0942	0.1543	0.4403	0	0.1973	0.0915	0.1381	0.1127		0	0.4068	0.1973		0.2401	0.2543	0	0.1137			0
RAP1GAP	982	AP	6			0	0.7609	0.9694	0.1709		0.7683		0.4489	0.6579	0.7932	0.7534		0.6289	0.0472		0.6182	0.9479	0.7722	0.8616		0.7858	0.7177	0.8576	0.6509	0.6707	0.7255	0.5597	1	0.8027	0.6515	0.7585	0.8404		0.8907	0.3677	0.8027		0.6102	0.7325	0.8804	0.4624			0.9494
RAP1GAP	983	AA	26.1:26.2	25.2	26.3	0	0.8935	0.7273	0.1074		0.6643	0.6569	0.6546	0.6009	0.6152	0.7	0.7503	0.6404	0.5188		0.7013	0.6065	0.8664	0.5203		0.6072	0.6209	0.6556	0.7582	0.777	0.698	0.8621	0.8747	0.591	0.708	0.4468	0.662		0.6066	0.7148	0.4717	0.6252	0.6943	0.671			0.7432		0.7406
RAP1GAP	984	AA	26.2	25.2	26.3	0	0.9668	0.4663	0.0525	0.7908	0.8952	0.9112	0.8457	0.8382	0.8545	0.8036	0.8831	0.8557	0.8675	0.8146	0.8575	0.8881	0.9599	0.85	0.8469	0.8045	0.8189	0.8531	0.8865	0.9424	0.8738	0.957	0.9681	0.8543	0.8677	0.8171	0.8744	0.827	0.8548	0.9245	0.879	0.7841	0.8767	0.8921	0.8607	0.9438	0.8715	0.8127	0.913
RAP1GAP	985	AA	26.1	25.2	26.2	0	0.9581	0.4702	0.0642	0.1108	0.1882	0.1601	0.2551	0.2253	0.213	0.3629	0.2828	0.2291	0.1394	0.0538	0.28	0.1616	0.2102	0.1605	0.3073	0.2743	0.2628	0.245	0.2869	0.1752	0.2508	0.2214	0.1867	0.1961	0.2699	0.1516	0.2188	0.1978	0.207	0.1696	0.1084	0.314	0.2416	0.1978	0.0889	0.1996	0.3014	0.1368	0.213
RAP1GAP	986	AA	25.1	24	25.2	0	0.9808	0.0156	0.0007	1	1	1	1	1	1	1	1	1	1	1	1	1	1	1	1	1	1	1	1	1	1	1	1	1	1	1	1	1	1	1	1	1	1	1	1	1	1	1	1
RAP1GAP	987	RI	22.3	22.2	22.4	0	0.7888	0.6218	0.0867	1	1		1	1	0.873	0.7824		1	1	1	1	0.6896	1			1	1	1	0.9582		1	1			1	0.8598	1	0.4254	1					1			0.4583	1	0.5378
RAP1GAP	988	RI	22.2:22.3	22.1	22.4	0	0.8342	0.9757	0.2607	1	0.4632		0.775	0.3986	0.1959	0.7772		0.4221	1	0.5668	0.2506	0.0982	0.2586	0.2929		0.1485	0.5114	0.3381	0.6429	0.2339	0.1157	0.4896		0.1485	0.5972	0.4586	0.5838		0.3141	1	1		0.2465	0.5019			1	0.3242	0.0802
RAP1GAP	990	AA	22.1:22.2:22.3	21	22.4	0	0.9634	0.4305	0.068	0.1011	0.0487	0.0039	0.0203	0.063	0.021	0.0291	0	0.0732	0.0088	0.1954	0.0174	0.0108	0.0314	0.0046	0	0.0139	0.0361	0.018	0.1237	0.0094	0.0502	0.0381	0	0.0066	0.0097	0.043	0.1109	0.0451	0.0637	0.0094	0.0161	0.0181	0.0062	0.0453	0	0.0056	0.0234	0.0542	0.0092
RAP1GAP	991	ES	22.1:22.2	21	22.4	0	0.9424	0.1839	0.0161	0.1101	0	0.0014	0.017	0	0.0048	0.0071	0	0	0		0	0.0049	0.0168	0.007	0	0	0	0	0.0088	0.0112	0	0.0138	0	0.0366	0	0.014	0	0.0209	0	0.0066	0	0.0177	0.0046	0	0	0	0.0366	0.0361	0.0158
RAP1GAP	992	ES	22.1	21	22.4	0	0.9476	0.3838	0.0593	0	0.0575	0.0056	0.0056	0.1	0.091	0.0286	0	0.1097	0	0.2413	0.0648	0.1202	0.0959	0.0124	0	0.0647	0.0584	0.036	0.0854	0.0447	0.3287	0.0334	0.0931	0.069	0.0113	0.0484	0.0883	0	0.1891	0	0.0056	0.0851	0.017	0.0712	0	0	0.0193	0.0995	0.1213
USP48	994	AP	12.1			0	1	0.8921	0.1924	0.6639	0.4537	0.27	0.5588	0.5769	0.3414	0.1513	0.2663	0.5321	0.3377	0.4572	0.4068	0.135	0.6092	0.3847	0.2155	0.4176	0.474	0.215	0.5631	0.2791	0.286	0.2603	0.5658	0.3284	0.3645	0.407	0.6369	0.4253	0.2932	0.2429	0.4293	0.2284	0.2105	0.5356	0.0793	0.4684	0.5397	0.2434	0.2845
USP48	995	AP	1			0	1	0.8921	0.1924	0.3361	0.5463	0.73	0.4412	0.4231	0.6586	0.8487	0.7337	0.4679	0.6623	0.5428	0.5932	0.865	0.3908	0.6153	0.7845	0.5824	0.526	0.785	0.4369	0.7209	0.714	0.7397	0.4342	0.6716	0.6355	0.593	0.3631	0.5747	0.7068	0.7571	0.5707	0.7716	0.7895	0.4644	0.9207	0.5316	0.4603	0.7566	0.7155
USP48	996	AT	27			0	1	0.7148	0.1024	0.595	0.6675	0.5303	0.5955	0.7245	0.4183	0.6748	0.6866	0.679	0.7472	0.5594	0.6744	0.6282	0.6148	0.631	0.5599	0.5693	0.6043	0.6557	0.6253	0.5902	0.5262	0.7267	0.6087	0.6914	0.4218	0.6771	0.7269	0.3931	0.4798	0.4257	0.5453	0.6059	0.6224	0.737	0.4392	0.4139	0.4436	0.508	0.5233
USP48	997	AT	11.2			0	1	0.7148	0.1024	0.405	0.3325	0.4697	0.4045	0.2755	0.5817	0.3252	0.3134	0.321	0.2528	0.4406	0.3256	0.3718	0.3852	0.369	0.4401	0.4307	0.3957	0.3443	0.3747	0.4098	0.4738	0.2733	0.3913	0.3086	0.5782	0.3229	0.2731	0.6069	0.5202	0.5743	0.4547	0.3941	0.3776	0.263	0.5608	0.5861	0.5564	0.492	0.4767
USP48	998	ES	23	22	24	0	1	0.1303	0.0176	0.9653	0.9711	0.9665	0.9751	0.9914	0.9738	0.9915	0.9856	0.9847	0.9969	0.9804	0.9846	0.9685	0.9896	0.99	0.9835	0.9674	0.9886	0.9756	0.9592	0.9908	0.9634	0.9634	0.9799	0.9784	0.9872	0.9659	0.976	0.948	0.9796	0.9844	0.9528	0.9747	0.9725	0.9489	0.9837	0.9636	0.9506	1	0.9811
USP48	999	AA	16.1	15	16.2	0	0.9948	0.4711	0.0364	0	0	0	0.0083	0.0155	0.0206	0	0	0	0	0	0	0	0	0	0	0	0.0107	0.0077	0	0	0	0.0189	0	0.0122	0	0	0	0	0	0	0	0	0	0	0	0	0.1334	0	0
USP48	1000	AA	14.1	13	14.2	0	0.9948	0.5084	0.0804	0.6932	0.7474	0.7439	0.8141	0.6752	0.7946	0.7742	0.7908	0.8286	0.5687	0.7074	0.6769	0.7916	0.8943	0.8088	0.8082	0.7074	0.7267	0.6462	0.766	0.7111	0.7287	0.7217	0.7049	0.7586	0.8039	0.878	0.7705	0.8713	0.6929	0.8354	0.8212	0.7154	0.7074	0.755	0.542	0.6772		0.7566	0.6745
USP48	1001	AA	10.1	9	10.2	0	0.9983	0.3829	0.0577	0.8247	0.8404	0.8935	0.8437	0.7575	0.9075	0.8389	0.961	0.8855	0.799	0.8317	0.8087	0.8438	0.7769	0.8587	0.7925	0.9018	0.8484	0.7981	0.7918	0.8955	0.7894	0.8235	0.8319	0.7918	0.8676	0.8514	0.824	0.9667	0.9003	0.78	0.8286	0.8165	0.9141	0.8033	0.6759	0.7841	0.9063	0.8351	0.8205
LDLRAD2	1002	RI	5.2	5.1	5.3	0	1	0.1163	0.006	1	1	1	1	1	1	1	1	1	1	1	1	1	1	1	1	1	1	1	1	1	1	1	1	1	1	1	1	1	1	1	1	1	1	1	1	1	1	1	1
CDC42	1003	AT	8			0	1	0.0745	0.0073	0.0081	0.0046	0.0045	0.0053	0.0084	0.0023	0.0035	0.0031	0.005	0.004	0.007	0.0035	0.0025	0.0037	0.0048	0.0078	0.0064	0.0052	0.0037	0.0081	0.0035	0.0028	0.0048	0.0052	0.0021	0.0091	0.0052	0.0041	0.0035	0.0021	0.0034	0.0012	0.0016	0.0025	0.0042	0.0019	0.004	0.0025	0.0074	0.0029
CDC42	1004	AT	9			0	1	0.0745	0.0073	0.9919	0.9954	0.9955	0.9947	0.9916	0.9977	0.9965	0.9969	0.995	0.996	0.993	0.9965	0.9975	0.9963	0.9952	0.9922	0.9936	0.9948	0.9963	0.9919	0.9965	0.9972	0.9952	0.9948	0.9979	0.9909	0.9948	0.9959	0.9965	0.9979	0.9966	0.9988	0.9984	0.9975	0.9958	0.9981	0.996	0.9975	0.9926	0.9971
CDC42	1005	ES	4	3	5	0	1	0.1115	0.009	0.0017	0.0024	0.0022	0.0068	0.0066	0.0028	0.0063	0.0055	0.0023	0.009	0.0038	0.0045	0.0023	0.0026	0.0056	0.0056	0.0063	0.0018	0.002	0.0065	0.0024	0.0084	0.0011	0.005	0.0013	0.0049	0.0027	0.0047	0.0024	0.0032	0.0022	0.0007	0.005	0.0014	0.002	0.0027	0.0059	0.0023	0.0017	0.0033
CDC42	1006	ES	2	1	3	0	1	0.2453	0.0306	0.0963	0.0796	0.0765	0.0911	0.1029	0.0796	0.103	0.0832	0.0794	0.1015	0.0897	0.0733	0.0602	0.065	0.1024	0.0732	0.0767	0.0642	0.0719	0.1214	0.0689	0.0883	0.1013	0.0652	0.064	0.0912	0.0696	0.0705	0.0614	0.0804	0.0965	0.0733	0.0994	0.0788	0.0837	0.0841	0.1185	0.047	0.0944	0.077
ZBTB40	1009	ES	05:06:00	4	7	0	0.9843	0.2431	0.0264	1	1	0.9322	0.9555	1	0.9486	1	1	1	1	1	1	1	0.9356	1	1	1	1	1	1	0.9531	1	0.9691	0.9023	1	0.9538	1	1	1	1	1	1	1	1	1	1	1	1	1	1
C1QA	1011	AP	1			0	0.9948	0.3028	0.0232	0.9651	0.9823	0.9819	0.9773	0.9658	0.9735	0.9439	0.9731	0.9604	0.9778	0.9792	0.9781	0.9795	0.9617	0.9698	0.9593	0.9888	0.9777	0.9776	0.967	0.9936	0.9604	0.9557	0.9802	0.9796	0.9756	0.9933	0.9797	0.9806	0.9779	0.9758	0.9684	1	0.9722	0.9815	0.9785	0.983	0.9688	0.9773	0.9852
C1QA	1012	AP	2.1			0	0.9948	0.3028	0.0232	0.0349	0.0177	0.0181	0.0227	0.0342	0.0265	0.0561	0.0269	0.0396	0.0222	0.0208	0.0219	0.0205	0.0383	0.0302	0.0407	0.0112	0.0223	0.0224	0.033	0.0064	0.0396	0.0443	0.0198	0.0204	0.0244	0.0067	0.0203	0.0194	0.0221	0.0242	0.0316	0	0.0278	0.0185	0.0215	0.017	0.0312	0.0227	0.0148
C1QC	1014	AD	1.3	1.2	2	0	0.9407	0.7222	0.0922	0.219	0.2643	0.229	0.2207	0.2233	0.2246	0.3355	0.1708		0.1407	0.2212	0.1803	0.1914	0.2476	0.2652	0.2403	0.2283	0.2036	0.3284	0.2921	0.2633	0.2393	0.274	0.2762	0.2069	0.2173	0.2311	0.2489	0.3092	0.2221	0.1569	0.1793		0.1496	0.2852	0.2384	0.252	0.1432	0.1714	0.2208
C1QC	1019	AD	1.2:1.3	1.1	2	0	0.9948	0.1152	0.0137	0.0248	0.0266	0.0256	0.0213	0.0213	0.0282	0.0375	0.0191	0.0185	0.0145	0.0257	0.0214	0.0199	0.0237	0.0241	0.0239	0.0254	0.0194	0.0433	0.0299	0.0295	0.0238	0.0344	0.0256	0.0261	0.0239	0.0264	0.0264	0.0351	0.0235	0.018	0.0194	0.0207	0.0122	0.0344	0.0231	0.0317	0.0242	0.0168	0.026
C1QC	1020	AD	1.2	1.1	2	0	0.9948	0.1643	0.0198	0.0909	0.0746	0.0845	0.0779	0.0829	0.0942	0.0853	0.0927	0.0641	0.0866	0.0894	0.0973	0.0833	0.0794	0.0773	0.0867	0.0873	0.0787	0.0852	0.0753	0.0856	0.0846	0.0899	0.0666	0.1	0.0791	0.0828	0.0819	0.0802	0.0914	0.0977	0.0904	0.0583	0.0665	0.0865	0.0767	0.0967	0.129	0.0802	0.0916
EPHB2	1023	AT	8			0	1	0.1887	0.0172	0	0	0	0	0	0.0039	0	0	0	0	0	0	0	0	0	0	0	0	0	0	0	0	0	0	0	0	0	0	0	0	0	0	0	0	0	0	0	0	0	0
EPHB2	1024	AT	17.5			0	1	0.1887	0.0172	1	1	1	1	1	0.9961	1	1	1	1	1	1	1	1	1	1	1	1	1	1	1	1	1	1	1	1	1	1	1	1	1	1	1	1	1	1	1	1	1	1
EPHB2	1025	RI	17.4	17.3	17.5	0	0.9511	0.186	0.02	0.9819	1	0.992	0.9906	1	1	1	0.9908	1	1	1	1	1	1	1	1	1	1	1	1	0.9898	1	1	1	1	0.987	1	1	1	1	1	0.8991		1	1	0.9903	0.9732	1	0.9866	1
EPHB2	1026	RI	17.2	17.1	17.3	0	0.9983	0.9802	0.1789	0.2134	0.1103	0.0311	0.137	0.3103	0.0699	0.1452	0.0312	0.1725	0.3028	0.1353	0.0509	0.1239	0.2323	0.1386	0.2765	0.1636	0.1604	0.1761	0.2809	0.0345	0.1355	0.0701	0.0988	0.0547	0.0979	0.3818	0.0843	0.3165	0.3442	0.0929	0.0609	1	0.1	0.2546	0.0349	0.058	0.1259	0.0402	0.1756
KDM1A	1030	ES	11	9	12	0	1	0.0205	0.0022	0	0	0	0	0	0	0	0	0	0	0	0	0	0	0	0	0	0	0	0	0	0	0.0032	0	0	0	0	0	0	0	0	0	0	0	0	0	0	0	0	0
KDM1A	1031	ES	10	9	12	0	1	0.0102	0.0007	0	0	0	0	0	0	0	0	0	0	0	0	0	0	0	0	0	0	0	0	0	0	0	0	0	0	0	0	0	0	0	0	0	0	0	0	0	0	0	0
KDM1A	1032	ES	3	2	4	0	0.9948	0.7708	0.0956	0.7624	0.6247	0.7635	0.5754	0.8843	0.7835	0.659	0.687	0.7132	0.573	0.6839	0.7142	0.7248	0.7218	0.7158	0.5536	0.6799	0.6509	0.6154	0.7336	0.6701	0.8148	0.7167	0.6116	0.6961	0.5162	0.7242	0.7033	0.6295	0.7235	0.6504	0.755	0.8201	0.7323	0.7187	0.6476	0.6752	0.5016	0.7082	0.7711
LUZP1	1036	AT	5			0	1	0.2194	0.0187	0.0132	0	0.0058	0	0.0088	0	0	0.0047	0	0.005	0.0015	0.0014	0	0	0	0	0.0242	0.0118	0.0135	0.0063	0	0	0.0029	0.0044	0	0	0.0153	0.0042	0	0	0	0	0.0193	0.0093	0	0	0.0259	0	0	0
LUZP1	1037	AT	6			0	1	0.2194	0.0187	0.9868	1	0.9942	1	0.9912	1	1	0.9953	1	0.995	0.9985	0.9986	1	1	1	1	0.9758	0.9882	0.9865	0.9937	1	1	0.9971	0.9956	1	1	0.9847	0.9958	1	1	1	1	0.9807	0.9907	1	1	0.9741	1	1	1
LUZP1	1039	ES	3.2	2	4	0	0.7976	0.1968	0.0199	1	1	1	1		1	1	1	1	1	1	1	1	1	1	1	1	1	1	1	1	1	1	0.9159	1	1	1	1			1		1	1	1	1	1		0.9601
HTR1D	1041	AT	2			0	0.9284	0.0697	0.0036	0	0	0	0	0	0		0	0	0	0.016	0	0	0	0	0	0	0	0	0	0		0	0	0	0	0	0	0	0	0	0	0	0	0	0	0		0	0
HTR1D	1042	AT	1.2			0	0.9284	0.0697	0.0036	1	1	1	1	1	1		1	1	1	0.984	1	1	1	1	1	1	1	1	1	1		1	1	1	1	1	1	1	1	1	1	1	1	1	1	1		1	1
HNRNPR	1043	AA	8.1	7	8.2	0	0.9983	0.3504	0.0461	0.139	0.3107	0.1261	0.0925	0.1496	0.137	0.1822	0.1442	0.2407	0.0391	0.1134	0.1511	0.1445	0.152	0.1071	0.1496	0.1704	0.1373	0.1214	0.1743	0.249	0.2701	0.2078	0.1326	0.1441	0.1371	0.1104	0.2048	0.1177	0.1633	0.17	0.1596	0.0589	0.2425	0.2136	0.1295	0.114	0.0294	0.0926	0.1821
HNRNPR	1044	ES	6	5	7	0	1	0.1034	0.0125	0.9831	0.9878	0.9756	0.9845	0.9936	0.9734	0.9705	0.9943	0.9842	0.9856	0.9869	0.9958	0.981	1	0.9941	0.9566	0.9812	0.986	0.955	0.9892	0.9966	0.9788	0.9768	0.9755	0.9752	0.9919	1	0.9774	1	0.984	0.9648	0.9774	0.9834	0.983	0.9706	0.9753	0.9814	1	0.9935	0.9834
HNRNPR	1046	ES	5	4	6	0	1	0.3546	0.0247	0.9768	0.9857	0.9724	0.9777	0.9744	0.971	0.9626	0.9801	0.9641	0.9672	0.9686	0.9428	0.9659	0.9895	0.9895	0.9742	0.978	0.9808	0.9623	0.9711	0.9469	0.9862	0.9626	0.9517	0.9828	0.9647	0.9428	0.9852	0.9379	0.9836	0.9779	0.9814	0.9686	0.9348	0.9693	0.9872	0.9559	0.9585	0.9577	0.974
HNRNPR	1047	AA	2.1	1	2.2	0	0.9494	0.8186	0.1059	0.3754	0.492	0.2888	0.4346	0.2789	0.392	0.3424	0.5461	0.4293	0.3579	0.3576	0.4301	0.4445	0.3849	0.3626	0.3567	0.392	0.4445	0.4441	0.392	0.5663	0.4639	0.4834	0.4129	0.4293	0.392	0.4204	0.4441		0.5919	0.4277	0.5301	0.5371	0.4204	0.296	0.3675	0.4563		0.3888	0.4583
HNRNPR	1048	ES	2.1:2.2	1	3	0	0.9983	0.669	0.0862	0.2444	0.4379	0.2299	0.4349	0.2062	0.2964	0.2079	0.4314	0.3519	0.2445	0.1838	0.3571	0.33	0.2894	0.2177	0.2645	0.2562	0.3305	0.2566	0.4038	0.3507	0.3551	0.3843	0.3977	0.3158	0.3265	0.2591	0.3162	0.226	0.3149	0.2847	0.35	0.3465	0.3065	0.2057	0.1879	0.3583	0.4775	0.2498	0.2351
HNRNPR	1049	ES	2.2	1	3	0	0.9983	0.894	0.0932	0.3516	0.4478	0.4255	0.5022	0.4039	0.3972	0.3368	0.3886	0.4213	0.369	0.2895	0.4258	0.3827	0.3958	0.3296	0.3948	0.35	0.3832	0.3035	0.5139	0.294	0.3904	0.402	0.486	0.3818	0.4304	0.3269	0.3684	0.2891	0.2416	0.3487	0.3244	0.3149	0.3806	0.3829	0.2861	0.4007	0.1926	0.345	0.2683
ZNF436	1050	AP	1			0	0.911	1	0.1759	0.5987	0.5634	0.5513	0.5494	0.5639	0.3073	0.1586	0.0628	0.5639	0.4905	0.6649	0.4615	0.3843	0.3613	0.1117	0.3542	0.8445	0.3012	0.4548	0.4751	0.683	0.6013	0.4299	0.543	0.6468	0.2465	0.3012	0.6554	0.582	0.622	0.3884	0.251	0.6534	0.683	0.4657	0.5987	0.7627		0.241	0.1883
ZNF436	1051	AP	2.1			0	0.911	1	0.1759	0.4013	0.4366	0.4487	0.4506	0.4361	0.6927	0.8414	0.9372	0.4361	0.5095	0.3351	0.5385	0.6157	0.6387	0.8883	0.6458	0.1555	0.6988	0.5451	0.5249	0.317	0.3987	0.5701	0.457	0.3532	0.7535	0.6988	0.3446	0.418	0.378	0.6116	0.749	0.3466	0.317	0.5343	0.4013	0.2373		0.759	0.8117
C1orf213	1054	RI	1.5	1.4	1.6	0	0.8325	0.7692	0.1633	1	1		0.7928	0.7715	0.7453	1	1	1	0.8758	0.9265	1	1			0.6429		1	0.8381	1			0.594	1	0.8381	1		0.84		0.6117		1			0.9321		0.7653	1	1	0.6429
C1orf213	1055	RI	1.3	1.2	1.4	0	1	0.7355	0.1344	0.9011	1	1	0.9375	0.6359	0.7295	0.629	1	1	0.3665	0.946	1	1	1	1	0.2645	1	0.7487	0.9213	1	1	1	0.8248	1	0.5642	1	0.7386	1	1	0.6781	1	1	1	1	1	1	1	1	1	0.2645
C1orf213	1056	RI	1.2:1.3	1.1	1.4	0	1	0.8277	0.1369	1	0.8607	1	0.9386	1	1	0.6434	1	1	0.5767	0.947	1	1	0.7894	1	1	1	0.7606	0.924	0.8611	0.8114	0.7561	0.8751	1	0.8687	1	1	0.8928	1	1	1	1	1	0.5892	0.9055	1	1	1	0.8081	0.4202
TCEA3	1058	AP	1			0	1	1	0.0916	0.8613	0.9249	0.9756	0.9559	0.9166	0.9965	1	0.9904	0.9622	0.9524	0.9675	0.951	0.9944	0.9649	0.9743	0.9251	0.9725	0.9675	0.9782	0.9553	0.983	0.9766	0.9525	0.9401	0.9768	0.9838	0.9784	0.9248	1	0.987	0.9797	0.9975	0.9948	0.9893	0.9609	0.9951	0.9957	0.9702	0.9192	0.9862
TCEA3	1059	AP	2.1			0	1	1	0.0916	0.1387	0.0751	0.0244	0.0441	0.0834	0.0035	0	0.0096	0.0378	0.0476	0.0325	0.049	0.0056	0.0351	0.0257	0.0749	0.0275	0.0325	0.0218	0.0447	0.017	0.0234	0.0475	0.0599	0.0232	0.0162	0.0216	0.0752	0	0.013	0.0203	0.0025	0.0052	0.0107	0.0391	0.0049	0.0043	0.0298	0.0808	0.0138
TCEA3	1060	AT	6			0	0.9983	0.3875	0.0301	0.0108	0.0153	0.0448	0.0204	0.0083	0.0086	0	0.037	0.0079	0.0074	0.0183	0.0129	0.0205	0.0119	0.0038	0.0211	0.0079	0.0501	0.0087	0.0212	0.006	0.0213	0.005	0.0097	0.008	0.0096	0.0132	0.0077	0.0268	0.0028	0.0039	0.0029	0.0033	0.0073	0.007	0.0234	0.0163	0.0074	0.0363	0.0083
TCEA3	1061	AT	12			0	0.9983	0.3875	0.0301	0.9892	0.9847	0.9552	0.9796	0.9917	0.9914	1	0.963	0.9921	0.9926	0.9817	0.9871	0.9795	0.9881	0.9962	0.9789	0.9921	0.9499	0.9913	0.9788	0.994	0.9787	0.995	0.9903	0.992	0.9904	0.9868	0.9923	0.9732	0.9972	0.9961	0.9971	0.9967	0.9927	0.993	0.9766	0.9837	0.9926	0.9637	0.9917
ASAP3	1066	AD	21.2	21.1	22	0	0.8796	0.5382	0.085	0.1512	0.1137	0.4973	0.1982	0.2553	0.0489		0.0885	0.1356	0.1352	0.2553	0.1785	0.1272	0.1998	0.1197	0.0769	0.189	0.2256	0.1771	0.0835	0.1863	0.0933	0.1251	0.1044	0.0451	0.1131	0.0679	0.0818		0.1521	0.1393			0.1371	0.197	0.248	0.215	0	0.04	0.0374
PITHD1	1068	AP	1			0	0.9983	0.4626	0.0477	0.9095	0.9769	0.9282	0.9643	0.9459	0.9927	1	0.9717	1	0.9395	0.9411	0.9883	1	0.9675	1	0.9544	0.9761	0.9829	0.98	0.9579	0.9305	0.9583	0.9711	0.9689	0.9916	0.9757	0.9723	0.9384	1	0.9405	0.9651	1	1	0.9803	0.9177	0.9854	0.9638	0.9659	0.9803	0.9918
PITHD1	1069	AP	4			0	0.9983	0.4626	0.0477	0.0905	0.0231	0.0718	0.0357	0.0541	0.0073	0	0.0283	0	0.0605	0.0589	0.0117	0	0.0325	0	0.0456	0.0239	0.0171	0.02	0.0421	0.0695	0.0417	0.0289	0.0311	0.0084	0.0243	0.0277	0.0616	0	0.0595	0.0349	0	0	0.0197	0.0823	0.0146	0.0362	0.0341	0.0197	0.0082
LYPLA2	1070	AP	1			0	0.9948	0.6297	0.097	0.9217	0.9183	0.9017	0.9547	0.941	0.9795	0.9813	0.8843	0.7529	0.9697	0.9567	0.8509	0.9655	1	0.9589	0.9896	0.9589	0.9477	0.9874	0.9751	0.9804	1	0.6933	0.9695	0.8629	0.9424	1	0.9566	0.9704	0.9423	0.9726	1	0.9529	1	0.942	0.9489	0.9462	0.9389	1	0.9135
LYPLA2	1071	AP	5.1			0	0.9948	0.6297	0.097	0.0783	0.0817	0.0983	0.0453	0.059	0.0205	0.0187	0.1157	0.2471	0.0303	0.0433	0.1491	0.0345	0	0.0411	0.0104	0.0411	0.0523	0.0126	0.0249	0.0196	0	0.3067	0.0305	0.1371	0.0576	0	0.0434	0.0296	0.0577	0.0274	0	0.0471	0	0.058	0.0511	0.0538	0.0611	0	0.0865
LYPLA2	1072	RI	8.5	8.4	8.6	0	1	0.3424	0.0431	0.1154	0.0597	0.0308	0.0588	0.0536	0.0429	0.0464	0.0292	0.0408	0.1343	0.067	0.0516	0.0131	0.0547	0.0351	0.0337	0.0404	0.0258	0.0594	0.0938	0.0163	0.0427	0.076	0.0309	0.0741	0.0505	0.0356	0.0829	0.0681	0.0575	0.0285	0.0355	0.0355	0.0116	0.0465	0.0433	0.0384	0.1412	0.0603	0.0508
LYPLA2	1073	RI	8.2:8.3	8.1	8.4	0	0.9843	0.9185	0.1511	0.8869	0.8634	0.6381	0.7753	0.4639	0.7577	0.7999	0.5782	0.7766	0.9403	0.7973	0.7814	0.4629	0.6942	0.4023	0.7976	0.6495	0.5306	0.8422	0.9589	0.6692	0.6218	0.7635	0.5994	0.8701	0.7641	0.5709	0.7776	0.4796	0.4856	0.6992	0.5586	0.1978	0.6004	0.7845	0.7738	0.5765	1	0.6924	0.5479
LYPLA2	1074	AA	8.3	8.1	8.4	0	0.9983	0.0584	0.01	0.9878	0.9939	0.986	0.9871	0.945	0.988	0.989	0.9889	0.994	0.9961	0.9866	0.9923	0.9913	0.9878	0.9796	0.9906	0.9811	0.9867	0.9934	0.9967	0.9867	0.9848	0.9796	0.9799	0.9909	0.9848	0.9843	0.9893	0.9746	0.9742	0.9837	0.9819	0.9647	0.9814	0.9904	0.992	0.9827	1	0.9826	0.9776
LYPLA2	1075	RI	8.2	8.1	8.3	0	0.993	0.4822	0.0427	0.1038	0.0427	0.0275	0.0488	0.0544	0.0419	0.0479	0.0171	0.0242	0.0659	0.0573	0.0309	0.0088	0.032	0.016	0.0421	0.0384	0.0173	0.039	0.0815	0.0306	0.0283	0.0708	0.0351	0.0639	0.0534	0.0239	0.0411	0.0274	0.0274	0.042	0.0257	0.01	0.032	0.0392	0.0315	0.0268	0.051	0.044	0.0316
LYPLA2	1076	ES	7	6	8.1	0	1	0.02	0.0015	1	1	1	1	1	0.9977	1	1	1	1	1	0.9992	1	1	1	1	1	1	1	1	1	1	1	1	1	1	1	1	1	1	1	1	1	1	1	1	1	1	1	1
GALE	1077	ES	3	2	4	1	0.9791	0.3557	0.0582	0.8228	0.8235	0.8571	0.7711	0.8988	0.8393	0.8764	0.9347	0.9223	0.7926	0.8764	0.8913	0.9661	0.846	0.944	0.8264	0.8474	0.9008	0.8711	0.9014	0.9167	0.888	0.8663	0.9164	0.882	0.7721	0.9619	0.9381	0.8703	0.8947	0.8791	0.8742	0.9423	0.9257	0.9293	0.788	0.8583	0.819	0.7966	0.8989
HMGCL	1078	AP	1			0	0.9983	0.3715	0.0405	0	0.0126	0.0032	0.0055	0.0071	0.0203	0.0128	0.0018	0.0052	0.0412	0.0104	0.0232	0.0047	0.0246	0.0089	0.0474	0	0.0243	0.0602	0.0158	0.0151	0.0318	0.0177	0.0421	0.0014	0.1185	0.0152	0.0088	0.0461	0.0458	0.0285	0.0406	0.0243	0.0093	0.0116	0.024	0.0209	0.0852	0.0058	0.0106
HMGCL	1079	AP	3			0	0.9983	0.3715	0.0405	1	0.9874	0.9968	0.9945	0.9929	0.9797	0.9872	0.9982	0.9948	0.9588	0.9896	0.9768	0.9953	0.9754	0.9911	0.9526	1	0.9757	0.9398	0.9842	0.9849	0.9682	0.9823	0.9579	0.9986	0.8815	0.9848	0.9912	0.9539	0.9542	0.9715	0.9594	0.9757	0.9907	0.9884	0.976	0.9791	0.9148	0.9942	0.9894
HMGCL	1080	ES	07:08:00	6	9	0	1	0.1049	0.0169	0.9863	1	0.979	0.9748	0.9818	0.9901	0.9789	0.9887	1	0.9676	0.9735	0.9809	0.9841	0.9894	0.9866	0.9912	0.9891	0.9834	0.9729	0.9709	0.9898	0.9813	0.951	0.9824	0.9824	0.943	0.9936	0.9813	0.9928	0.9759	0.9666	0.9834	1	0.9927	0.994	0.9539	0.9827	0.9652	0.985	0.986
MYOM3	1085	AT	31.2			0	0.993	0.6108	0.0772	0	0	0	0	0	0	0	0	0	0	0	0.2681	0.0243	0	0	0	0	0	0	0.1391	0	0	0	0	0	0	0	0.0247	0	0	0	0	0	0.6108	0	0	0		0	0.1145
MYOM3	1086	AT	39			0	0.993	0.6108	0.0772	1	1	1	1	1	1	1	1	1	1	1	0.7319	0.9757	1	1	1	1	1	1	0.8609	1	1	1	1	1	1	1	0.9753	1	1	1	1	1	0.3892	1	1	1		1	0.8855
IFNLR1	1092	AT	7.2			0	1	0.3447	0.0591	0	0	0	0.2161	0	0	0	0	0.1286	0.1784	0.0421	0.0139	0.0144	0	0	0	0	0.0303	0.2304	0.0488	0.0963	0	0	0	0.1075	0.3266	0.0816	0.1881	0	0	0	0	0	0	0	0	0	0.1493	0.0677	0
IFNLR1	1093	AT	5.2			0	1	0.3518	0.0559	0.1002	0.0628	0.1264	0.0624	0.0969	0.0505	0.0639	0.055	0.1187	0.1482	0.0583	0.0706	0.0133	0.0386	0	0	0.0529	0.028	0.1443	0.0225	0	0.0706	0.0224	0.0493	0.1134	0.0592	0.0565	0.071	0	0.1091	0.1715	0	0.0481	0.03	0.0422	0.0841	0.1483	0.3446	0.0437	0.0551
IFNLR1	1094	AT	8.2			0	1	0.5013	0.0848	0.8998	0.9372	0.8736	0.7215	0.9031	0.9495	0.9361	0.945	0.7526	0.6733	0.8996	0.9154	0.9722	0.9614	1	1	0.9471	0.9417	0.6252	0.9287	0.9037	0.9294	0.9776	0.9507	0.7791	0.6142	0.862	0.7408	1	0.8909	0.8285	1	0.9519	0.97	0.9578	0.9159	0.8517	0.5061	0.8886	0.9449
IFNLR1	1096	ES	7.1	6	8.1	0	0.815	0.7134	0.087	1	0.9656	1	1	0.9299	1	0.8491			1	0.9697	0.9401	0.9403	1	0.8893	1		1	0.9538	1	1		1	0.8393	1	1	1	0.9039		1	1		1	1	1	1	1		0.9348	0.8629
GRHL3	1099	AT	17			0	0.8691	0.7833	0.0956	0.9233	0.9129	1	1	1	1	1	1		0.9812	1	0.991	1	0.9755	0.9147	1		1	0.8337	0.7001	1	0.9326	0.8894	1	0.9895	0.9064	1	0.9679		1	1	1	0.8469	1	0.9121	1	1	1	0.9423
GRHL3	1100	AT	18			0	0.8691	0.7833	0.0956	0.0767	0.0871	0	0	0	0	0	0		0.0188	0	0.009	0	0.0245	0.0853	0		0	0.1663	0.2999	0	0.0674	0.1106	0	0.0105	0.0936	0	0.0321		0	0	0	0.1531	0	0.0879	0	0	0	0.0577
STPG1	1103	AP	2			0	0.8691	0.5736	0.0652	0.9723	0.88	0.9506	0.9804	0.8063	0.9786		0.972	1	0.9403	0.909	0.9317	0.9625	0.9123		1		0.9901	0.9021	1	0.9433	0.7846	0.8698	0.9259	0.9765	0.934	0.9433	0.8513		1	1		0.969	0.8426	1	0.9687	0.9499	0.9542	0.9239	0.9831
STPG1	1104	AP	3.1			0	0.8691	0	0	0	0	0	0	0	0		0	0	0	0	0	0	0		0		0	0	0	0	0	0	0	0	0	0	0		0	0		0	0	0	0	0	0	0	0
STPG1	1105	AP	1			0	0.8691	0.5736	0.0652	0.0277	0.12	0.0494	0.0196	0.1937	0.0214		0.028	0	0.0597	0.091	0.0683	0.0375	0.0877		0		0.0099	0.0979	0	0.0567	0.2154	0.1302	0.0741	0.0235	0.066	0.0567	0.1487		0	0		0.031	0.1574	0	0.0313	0.0501	0.0458	0.0761	0.0169
STPG1	1106	ES	4	3.2	5	0	0.9843	0.6765	0.1381	0.894	1	0.8851	0.8718	1	0.6145	1	1	1	1	0.8361	0.9682	0.8911	1	1	1	1	0.9583	0.4595	0.7343	1	0.9107	0.8029	1	0.8784	1	0.8416	0.6801	1	1	0.539	1	0.9417	1	0.9718	0.8648	1	0.914	0.9571	0.6671
NIPAL3	1109	AT	14			0	1	0.8008	0.1296	0.1941	0.1279	0.5117	0.1719	0.1292	0.2722	0.5661	0.4507	0.216	0.3307	0.3279	0.1675	0.2733	0.1774	0.1605	0.2244	0.3157	0.413	0.2456	0.1999	0.2743	0.2079	0.14	0.1547	0.2201	0.2482	0.1486	0.2281	0.3117	0.2516	0.2383	0.3008	0.4132	0.2905	0.1333	0.5867	0.5858	0.5355	0.365	0.1791
NIPAL3	1110	AT	9			0	1	0.1897	0.0137	0.0125	0.0057	0.0016	0.0152	0.0051	0.0094	0.0101	0	0.0103	0.0086	0.0282	0.0068	0.0019	0.0137	0.0117	0	0	0.0084	0.0086	0.0228	0.0049	0.0052	0.0052	0.0095	0.002	0.0062	0.0014	0.0052	0	0.0048	0.0027	0.018	0.0297	0.0061	0.0029	0.0072	0.0088	0.0097	0.0049	0.0074
NIPAL3	1111	AT	15			0	1	0.7972	0.1319	0.7934	0.8665	0.4866	0.8129	0.8657	0.7184	0.4239	0.5493	0.7737	0.6608	0.6439	0.8256	0.7248	0.8089	0.8278	0.7756	0.6843	0.5786	0.7458	0.7772	0.7208	0.787	0.8548	0.8357	0.7778	0.7456	0.85	0.7667	0.6883	0.7437	0.759	0.6812	0.5571	0.7034	0.8637	0.406	0.4053	0.4547	0.6301	0.8136
NIPAL3	1112	ES	3	2	4	0	0.8586	1	0.0923	0.0113	0.0406	0.0223	0.0207	0.069	0	0.027	0.0146	0.0207	0.0122	0	0.0294	0.0343	0.0548	0.0455	0	0	0	0.0656	0.0331	0.0426	0.0207	0.0131	0.0769	0.0426	0.0297	0.0255	0		0.0426	0.0308			0.0526	0	0	0		0.0447	0
RCAN3	1115	AA	4.1	3	4.2	0	0.9651	0	0	1	1	1	1	1	1	1	1	1	1	1	1	1	1	1	1	1	1	1	1	1	1	1	1	1	1	1	1	1	1	1	1		1	1	1	1	1	1	1
RCAN3	1116	ES	4.1:4.2	3	5	0	1	0.0553	0.0077	1	1	1	1	1	1	1	0.9854	1	1	1	1	1	1	1	1	1	1	1	1	1	1	1	1	1	0.9923	1	1	1	1	1	1	1	1	1	1	1	1	1	1
RCAN3	1118	ES	3:4.1:4.2	2	5	0	1	0.0525	0.0075	1	1	1	1	1	1	1	1	0.9711	1	1	1	1	1	1	1	1	1	1	1	1	1	0.9784	1	1	0.9937	1	1	1	0.9669	1	1	1	1	1	1	1	1	0.9922	1
RCAN3	1122	ES	3	2	4.1	0	0.9983	0.2486	0.0283	1	0.9844	0.9643	0.9915	0.9693	0.956	1	1	0.9392	0.9708	0.9759	1	0.985	0.9482	0.9831	1	1	0.9903	0.957	0.9097	1	1	1	0.9858	1	0.9795	0.9729	0.9518	1	0.9645	1	1	1	1	0.9699	0.9869	0.991	0.9264	0.9922	0.9338
SRRM1	1128	ES	16	15	17	0	0.9948	0.6465	0.1024	0.8187	0.7418	0.8192	0.6637	0.7762	0.7191	0.5752	0.9014	0.7099	0.499	0.6689	0.6286	0.7558	0.5752	0.6421	0.5952	0.7494	0.7124	0.8042	0.6842	0.7592	0.6862	0.7017	0.6286	0.6937	0.7783	0.7925	0.6768	0.5752	0.6206	0.8101	0.6476	0.7852	0.5517	0.8304	0.6123	0.705	0.92	0.7518	0.8678
SRRM1	1129	AD	12.2	12.1	13	0	0.9948	0.5223	0.0637	0.8411	0.831	0.8168	0.807	0.7633	0.8867	0.7835	0.8178	0.6882	0.7752	0.7848	0.8117	0.7652	0.8287	0.793	0.884	0.9241	0.7247	0.7474	0.861	0.8553	0.8547	0.7507	0.8578	0.7251	0.8339	0.7679	0.7903	0.686	0.8489	0.8619	0.8729	0.8445	0.7729	0.8262	0.738	0.8027	0.4382	0.8499	0.9052
SRRM1	1130	ES	11	10.2	12.1	0	0.9843	0.3077	0.0451	0.1159	0.0294	0.0279	0.0997	0.015	0.0523	0	0.0153	0	0.0917	0.0521	0.0272	0.0092	0.0395	0.0156	0.0141	0	0.01	0.0355	0.0374	0.0217	0	0.0206	0.0204	0	0.0429	0.0465	0.0415	0	0	0	0	0	0.0295	0.0768	0.0845	0.0516	0.0653	0.0384	0
SRRM1	1131	AA	10.1	9	10.2	0	0.9913	0.0158	0.0009	1	1	1	1	1	1	1	1	1	1	1	0.9895	1	1	1	1	1	1	1	1	1	1	1	1	1	1	1	1	1	1	1	1	1	1	1	1	1	1	1	1
SRRM1	1132	AA	8.1	7	8.2	0	1	0.2075	0.0242	0.9626	0.9829	0.939	0.987	0.9758	0.9788	1	0.9597	0.9855	0.9628	0.9901	0.968	0.9869	0.951	0.9438	0.9771	0.9343	0.9926	0.9283	0.9785	0.9737	0.9442	0.9919	0.9934	0.9908	0.9572	0.9394	0.9509	1	0.9535	0.9715	0.9707	1	1	0.9234	1	0.9873	0.8047	0.9879	0.9846
SRRM1	1133	ES	04:05:00	3	6	0	0.9913	1	0.1267	0.2672	0.0313	0.0443	0.168	0.1015	0.0631	0.0199	0.0994	0.0838	0.0715	0.1636	0.0934	0.0113	0.1594	0.0315	0.0473	0.0881	0.0357	0.2103	0.112	0.013	0.0405	0.0831	0.0751	0.0703	0.0639	0.0651	0.2174	0.0199	0.1483	0.0592	0.196	0.0506	0.0229	0.1213	0.0321	0.1007	0.7452	0.0175	0.0764
CLIC4	1134	RI	6.2	6.1	6.3	0	1	0.006	0.0009	1	1	0.9985	0.9993	1	1	1	0.9976	1	1	0.9993	1	0.9979	1	1	0.9979	1	1	1	1	1	1	1	1	1	1	1	1	1	1	1	1	1	1	1	0.999	1	1	1	1
SYF2	1139	ES	3	2	4	0	0.9983	0.0431	0.007	0.9878	0.9885	0.9929	0.9964	0.9904	0.9942	1	0.9974	1	0.9941	0.979	0.9914	0.9956	0.9909	0.9955	0.996	0.9569	0.9956	0.9935	0.9754	0.9945	0.995	0.9891	1	0.991	0.9828	0.9962	0.9968	0.9931	1	0.9899	0.995	0.9934	0.9948	0.9815	0.9958	0.9962	0.9931	0.9952	0.9956
C1orf63	1140	AP	2			0	1	0.7282	0.0872	0.8811	0.8706	0.9444	0.7604	0.7261	0.9128	0.8796	0.8024	0.8146	0.8689	0.8865	0.9004	0.9175	0.8082	0.7591	0.8157	0.8383	0.8773	0.9038	0.8414	0.7203	0.9076	0.8751	0.727	0.8631	0.6877	0.8971	0.8239	0.9174	0.9106	0.9001	0.8509	0.9665	0.918	0.8738	0.9257	0.904	0.8967	0.7603	0.7367
C1orf63	1141	AP	1			0	1	0.7282	0.0872	0.1189	0.1294	0.0556	0.2396	0.2739	0.0872	0.1204	0.1976	0.1854	0.1311	0.1135	0.0996	0.0825	0.1918	0.2409	0.1843	0.1617	0.1227	0.0962	0.1586	0.2797	0.0924	0.1249	0.273	0.1369	0.3123	0.1029	0.1761	0.0826	0.0894	0.0999	0.1491	0.0335	0.082	0.1262	0.0743	0.096	0.1033	0.2397	0.2633
C1orf63	1145	ES	5.1:5.2:6.1	4.2	6.2	0	0.9878	1	0.2912	0.6611	0.3535	0.1424	0.3744	0.9068	0.2885	0.5047	0.4326	0.8885	0.5992	0.6466	0	0	0.643	0.885		0.2654	0.5062	0.6596	0.5197	0	0.3996	0.6037	0.5883	0	0.5541	0.5211	0.746	0	0.2987	0	0.436	0	0.2462	0.7975	0.0582	0.4515	0	0.7286	0.3419
C1orf63	1146	AA	6.1	4.2	6.2	0	0.9302	1	0.2897	0.8033	0.6839	0.2624	0.4554	0.9091	0.4483	0.5608	0.8017		0.7765	0.6122	0.7232	0.2417	0.8199	0.9111	0.9663	0.2791	0.4728	0.3093	0.6361	0.6472	0	0.7496	0	0.4003	0.6186	0.7797	0.7081	0.4227	0.4544	0.739	0.8056	0.2272	0	0.8396	0.0622	0.4721	0.669	0.7873	0.3577
C1orf63	1147	ES	5.1:5.2:5.3	4.2	6.2	0	0.9948	0.9881	0.2209	0.7002	0.5146	0.2424	0.3665	0.8886	0.3316	0.4979	0.7103	0.7928	0.6416	0.5853	0.5249	0.1343	0.668	0.8747	0.9189	0.3779	0.368	0.455	0.537	0.4885	0.1736	0.6291	0.3887	0.1762	0.529	0.649	0.7026	0.2126	0.2286	0.4537	0.4902	0.0948	0.0326	0.7629	0.1211	0.3415	0.4444	0.7107	0.396
C1orf63	1148	ES	4.2:5.1	4.1	5.2	0	0.9581	0.0201	0.0009	1	1	1	1	1	1	1	1	1	1	1	1	1	1	1	1	1	1	1	1	1	1	1	1	1	1	1	1	1	1	1	1	1		1		1	1	1	1
RHCE	1185	ES	07:08:09	6	10	0	0.8272	0.4676	0.0544	1		1	1	1	0.9497		0.9823	1	1	0.9823	0.976	1	1	1	1		1	1	1	1	1	1	1	1	0.8575	1	0.9697		0.8693	1	1		1	0.8078		1	1	1	1
TMEM57	1189	ES	05:06:00	4	7	0	1	0.0749	0.0106	1	0.993	0.9797	0.983	1	0.9922	0.9864	1	1	1	0.9892	0.9946	1	1	1	1	1	1	0.9924	1	1	1	0.9942	1	0.9808	0.9956	1	0.9942	1	0.9674	1	1	1	1	1	0.9746	1	1	1	1
TMEM57	1190	ES	2:3:4:5:6	1	7	0	1	0.0414	0.0035	0.9935	1	0.9888	1	1	1	1	1	1	1	1	1	1	1	1	1	1	0.9838	1	1	1	1	1	1	1	1	1	1	1	1	1	1	1	1	1	1	1	1	1	1
MAN1C1	1192	AP	4			0	1	0.7901	0.154	0.8159	0.4624	0.6055	0.5541	0.6176	0.5082	0.4037	0.7496	0.6925	0.2099	0.6641	0.5646	0.5392	0.6639	0.7293	0.7545	0.6252	0.7145	0.6085	0.8036	0.503	0.6839	0.5022	0.8071	0.5192	0.6629	0.6425	0.5796	0.709	0.6085	0.4894	0.9099	0.5566	0.352	0.7661	0.6224	0.7785	0.8899	0.6492	0.4677
MAN1C1	1193	AP	1			0	1	0.7901	0.154	0.1841	0.5376	0.3945	0.4459	0.3824	0.4918	0.5963	0.2504	0.3075	0.7901	0.3359	0.4354	0.4608	0.3361	0.2707	0.2455	0.3748	0.2855	0.3915	0.1964	0.497	0.3161	0.4978	0.1929	0.4808	0.3371	0.3575	0.4204	0.291	0.3915	0.5106	0.0901	0.4434	0.648	0.2339	0.3776	0.2216	0.1101	0.3508	0.5323
SEPN1	1195	ES	3	2	4	0	0.9913	0.891	0.0796	0.324	0.1705	0.1836	0.2786	0.4356	0.2337	0.3338	0.2455	0.3901	0.1729	0.2197	0.2343	0.2408	0.2656	0.3548	0.1812	0.2391	0.2568	0.1578	0.2266	0.239	0.2266	0.1427	0.2093	0.2205	0.2711	0.2748	0.3107	0.3272	0.1839	0.2779	0.2306	0.2047	0.1226	0.3277	0.2171	0.3289	0.188	0.2359	0.2776
MTFR1L	1196	AP	4.1			0	1	0.7436	0.1177	0.3942	0.2125	0.1771	0.214	0.3304	0.1651	0.1787	0.1429	0.2823	0.1774	0.2444	0.1693	0.1216	0.2733	0.2497	0.1409	0.2179	0.1245	0.2035	0.3407	0.2003	0.1885	0.1674	0.2504	0.1605	0.1594	0.2429	0.3368	0.15	0.1785	0.1664	0.111	0.1195	0.1327	0.2356	0.079	0.1509	0.268	0.2225	0.1714
MTFR1L	1197	AP	3.1			0	1	0.2885	0.0531	0.1848	0.0754	0.0761	0.1092	0.1547	0.0201	0.0817	0.1029	0.0453	0.0645	0.0957	0.078	0.0121	0.0958	0.0644	0.0129	0.0146	0.0406	0.1909	0.1174	0.0083	0.0296	0.1101	0.067	0.0284	0.1373	0.0778	0.1812	0.0591	0.1017	0.1152	0.047	0.0361	0	0.0378	0.0429	0.0502	0.0578	0.1322	0.0205
MTFR1L	1198	AP	1			0	1	0.865	0.158	0.3638	0.6646	0.6715	0.5949	0.4383	0.7485	0.608	0.6032	0.5286	0.5846	0.5576	0.7085	0.8264	0.4757	0.6587	0.8143	0.5657	0.8026	0.4212	0.4366	0.7667	0.7379	0.5989	0.6236	0.7643	0.6047	0.5803	0.4091	0.6934	0.5351	0.6157	0.7799	0.7014	0.7922	0.713	0.8102	0.6995	0.6551	0.576	0.742
MTFR1L	1199	AP	2.1			0	1	0.2413	0.0445	0.0572	0.0475	0.0753	0.0819	0.0766	0.0663	0.1316	0.1511	0.1437	0.1735	0.1023	0.0442	0.0399	0.1552	0.0273	0.0319	0.2018	0.0322	0.1844	0.1054	0.0247	0.044	0.1237	0.059	0.0469	0.0986	0.099	0.0729	0.0975	0.1846	0.1027	0.0621	0.143	0.0751	0.0136	0.0679	0.0994	0.0191	0.0693	0.0661
MTFR1L	1202	AT	10.5			0	1	0	0	0	0	0	0	0	0	0	0	0	0	0	0	0	0	0	0	0	0	0	0	0	0	0	0	0	0	0	0	0	0	0	0	0	0	0	0	0	0	0	0
MTFR1L	1204	AT	11			0	1	0	0	1	1	1	1	1	1	1	1	1	1	1	1	1	1	1	1	1	1	1	1	1	1	1	1	1	1	1	1	1	1	1	1	1	1	1	1	1	1	1	1
MTFR1L	1205	AA	10.1:10.2:10.3	9	10.4	0	1	0.0561	0.0068	1	1	1	1	0.9937	1	1	0.9912	1	0.9852	0.9955	0.9904	0.9897	1	1	0.994	1	0.9947	0.9972	0.9952	1	0.9877	0.9975	1	1	0.9932	0.9854	0.9941	0.9904	1	1	0.992	1	0.9868	0.9968	0.9939	1	0.9689	0.9921	0.9926
MTFR1L	1207	AA	10.3	9	10.4	0	0.9564	0.3415	0.0456	1	1	1	1	0.9182	1	1	0.9515	1	0.9201	0.962	0.9235	0.9102	1	1	0.9628	1	0.9605	0.9783	0.9492	1	0.8532	0.9693	1	1	0.9755	0.8437	0.933	0.8951	1	1	0.9415	1	0.8992	0.9823	0.9504	1	0.7697	0.9436	0.9254
MTFR1L	1208	AA	10.1	9	10.2	0	1	0.3057	0.0302	0.9849	0.9322	0.9687	0.9521	0.9543	0.9573	1	0.9353	0.9565	0.966	0.9434	0.9694	0.9707	1	0.9726	0.9751	0.9846	0.94	0.9549	0.9772	0.9458	0.9642	0.9739	0.968	0.9491	0.9837	0.9781	0.9509	0.9633	0.9527	0.969	0.9759	0.9274	0.9572	0.9385	0.9684	0.925	0.9696	0.9574	0.985
MTFR1L	1209	AA	10.1:10.2	9	10.3	0	1	0.2363	0.0418	0.8602	0.9072	0.9502	0.9145	0.9433	0.866	0.9332	0.8669	0.9594	0.867	0.9089	0.9081	0.9135	0.8901	0.7742	0.878	0.9491	0.8969	0.8978	0.9256	0.9627	0.9402	0.9365	0.945	0.9171	0.8058	0.933	0.9306	0.9356	0.8886	0.891	0.8979	0.8755	0.9052	0.8659	0.9059	0.8619	0.9181	0.9004	0.922
MTFR1L	1210	AA	10.2	9	10.3	0	0.8901	0.9	0.1465	0.0903	0.4249	0.3849	0.3493	0.442	0.2248		0.3109	0.53	0.1885	0.3805	0.2427	0.2434	0	0.0911	0.1553		0.3612	0.2973	0.2291	0.5993	0.3704	0.2861	0.3638	0.3798	0.0656		0.4151	0.3688	0.2831	0.2094	0.181	0.365	0.3037	0.3017	0.2471	0.3474		0.2952	0.1536
MTFR1L	1211	ME	5|6	4.2	7.2	0	0.9756	0.6905	0.1264	0.5988	0.6827	0.5514	0.5289	0.5866	0.6107	0.6602	0.6822	0.729	0.6276	0.6766	0.6804	0.7583	0.5112	0.5628	0.8279	0.8519	0.6432	0.5854	0.6198	0.8071	0.6107	0.7119	0.5264	0.8146	0.6609	0.8176	0.5892	0.7881	0.6653	0.729	0.5958	0.8933		0.708	0.6015	0.7519	0.5496	0.6145	0.7064
MTFR1L	1212	AA	7.1	4.2	7.2	0	0.9895	0.7124	0.1026	0.1781	0.1158	0	0.099	0.1036	0.0225	0	0.0761	0.1369	0.0511	0.0902	0.0348	0.0089	0.081	0.062	0.0275	0.062	0.0654	0.0409	0.1565	0.0199	0.1044	0.032	0.0394	0.0266	0.0571	0.0364	0.0956	0.0215	0.0763	0.0981	0.134	0.0536	0.0221	0.0645	0.0223	0.0299	0.1961	0.034	0.0257
MTFR1L	1213	ES	6	4.2	7.2	0	0.9965	0.7339	0.1107	0.2239	0.1326	0.2189	0.1514	0.1618	0.0655	0.1892	0.1066	0.0534	0.051	0.1438	0.0758	0.0667	0.1519	0.2075	0.028	0.0387	0.1822	0.1295	0.2591	0.0242	0.0786	0.0765	0.1177	0.0182	0.0751	0.0746	0.2221	0.057	0.0915	0.0622	0.206	0.017	0.0524	0.0581	0.0598	0.0869	0.1824	0.1841	0.051
MTFR1L	1214	ES	5	4.2	7.2	0	1	0.8835	0.1188	0.301	0.2475	0.2563	0.1669	0.215	0.0991	0.312	0.2039	0.1317	0.083	0.2599	0.1487	0.1831	0.1578	0.2521	0.1216	0.1882	0.2865	0.1736	0.3632	0.094	0.1181	0.1699	0.1291	0.0753	0.1367	0.2654	0.2905	0.1835	0.1668	0.1515	0.2766	0.1263	0.0281	0.1301	0.0876	0.2237	0.214	0.2645	0.1145
AUNIP	1219	AT	3.2			0	1	0.4829	0.0643	0.4078	0.5198	0.4662	0.5138	0.5546	0.438	0.5067	0.4899	0.562	0.4932	0.4865	0.465	0.5954	0.5494	0.426	0.4518	0.5521	0.4707	0.4815	0.5383	0.489	0.5067	0.4455	0.4485	0.4465	0.4902	0.5653	0.5077	0.5641	0.4072	0.5138	0.3554	0.3977	0.4831	0.5833	0.3985	0.4201	0.5382	0.5248	0.4804
AUNIP	1220	AT	4			0	1	0.4829	0.0643	0.5922	0.4802	0.5338	0.4862	0.4454	0.562	0.4933	0.5101	0.438	0.5068	0.5135	0.535	0.4046	0.4506	0.574	0.5482	0.4479	0.5293	0.5185	0.4617	0.511	0.4933	0.5545	0.5515	0.5535	0.5098	0.4347	0.4923	0.4359	0.5928	0.4862	0.6446	0.6023	0.5169	0.4167	0.6015	0.5799	0.4618	0.4752	0.5196
STMN1	1221	AP	3			0	0.9895	0.0474	0.0058	0.0077	0.0095	0.0096	0.0102	0	0.0098	0.0173	0.0218	0.0196	0.0329	0.0151	0.0105	0.0135	0.0194	0.0051	0.0126	0.0183	0.0177	0.0098	0.0229	0.0122	0.012	0.0142	0.0082	0.0156	0.0152	0.0188	0.015	0.0182	0.0079	0.0104	0.0105	0.0091	0.0186	0.0137	0.0115	0.0132	0.0271	0.0092	0.0199
STMN1	1222	AP	4			0	0.9895	0.0656	0.0042	0	0	0	0	0	0	0	0	0.011	0.0038	0.0112	0.0078	0.0047	0	0	0.005	0.0039	0.0025	0.0013	0.0026	0	0.0048	0.0072	0.0016	0	0	0.0048	0	0	0	0	0.0049	0	0	0	0	0.0061	0.006	0	0.0035
STMN1	1223	AP	2			0	0.9895	0.0891	0.008	0.9876	0.9878	0.9891	0.9866	1	0.988	0.979	0.9774	0.9694	0.9625	0.9709	0.9796	0.9818	0.9806	0.9949	0.9824	0.9758	0.9774	0.9866	0.9745	0.9878	0.9833	0.9778	0.9895	0.983	0.9838	0.9741	0.9842	0.9818	0.9921	0.9886	0.9846	0.9909	0.9814	0.9863	0.987	0.9784	0.9669	0.9896	0.9766
STMN1	1224	AP	1			0	0.9895	0.0178	0.0022	0.0046	0.0026	0.0013	0.0031	0	0.0022	0.0037	0.0007	0	0.0008	0.0028	0.0022	0	0	0	0	0.002	0.0025	0.0023	0	0	0	0.0009	0.0008	0.0014	0.001	0.0024	0.0008	0	0	0.001	0	0	0	0	0.0015	0.0023	0	0.0011	0
STMN1	1225	AT	9			0	1	0.0352	0.0038	0.009	0.0023	0.0023	0.0048	0.0049	0.0003	0.0003	0.016	0	0.0011	0.0171	0.0018	0.0006	0.0134	0.0133	0.015	0.001	0.0139	0.0016	0.0025	0.0007	0.0014	0.0171	0.0017	0.0033	0.0039	0.0008	0.0136	0.0029	0	0.0024	0.0072	0.0019	0	0.0015	0.002	0.0044	0.0003	0.0036	0.0049
STMN1	1226	AT	8			0	1	0.0352	0.0038	0.991	0.9977	0.9977	0.9952	0.9951	0.9997	0.9997	0.984	1	0.9989	0.9829	0.9982	0.9994	0.9866	0.9867	0.985	0.999	0.9861	0.9984	0.9975	0.9993	0.9986	0.9829	0.9983	0.9967	0.9961	0.9992	0.9864	0.9971	1	0.9976	0.9928	0.9981	1	0.9985	0.998	0.9956	0.9997	0.9964	0.9951
ZNF593	1230	RI	2.2	2.1	2.3	0	0.993	0.1295	0.0102	0.0069	0.0125	0.0066	0.0055	0.0215	0.0053	0.0059	0.0023	0.0076	0.0062	0.0067	0.0059	0.0014	0.0194	0.0047	0.0025	0.0071	0.0042	0.0039	0.0069	0.0077	0.0106	0.0057	0.0047	0.0064	0.0024	0	0.0042	0.0044	0	0.0058	0.0088	0.0104	0.0016	0.0065	0	0.0023	0.0021	0.0038	0.0015
CNKSR1	1231	AP	1.1			0	0.9878	1	0.0912	0.9103	0.9493	1	0.9624	0.9679	0.9816	0.9326	1	0.9874	1	0.9907	0.9737	0.9914	1	0.9091	1	0.9468	0.8316	0.9648	0.8357	0.9663	0.9721	0.9886	0.9882	0.9711	0.9411	0.9618	0.9875	0.6558	1	0.9422	1	1	0.9861	0.9922	1	1		0.9824	1
CNKSR1	1232	AP	2.1			0	0.9878	1	0.0912	0.0897	0.0507	0	0.0376	0.0321	0.0184	0.0674	0	0.0126	0	0.0093	0.0263	0.0086	0	0.0909	0	0.0532	0.1684	0.0352	0.1643	0.0337	0.0279	0.0114	0.0118	0.0289	0.0589	0.0382	0.0125	0.3442	0	0.0578	0	0	0.0139	0.0078	0	0		0.0176	0
CNKSR1	1236	RI	10.2	10.1	10.3	0	0.9459	1	0.1227	0.2964	0.3907	0.1137	0.2196	0.1803	0.1054	0.3204	0.1065	0.2481	0.1874	0.2074	0.134	0.0485	0.2027	0.2308		0	0.372	0.3781	0.291	0.0094	0.0476	0.2369	0.2	0.1489	0.1908	0.3249	0.2602		0	0.0193	0.1111	0	0.084	0.2391	0.0723	0.1157		0.171	0.1777
CNKSR1	1238	AD	8.2	8.1	9	0	0.9721	0.6421	0.0813	0.2405	0.2411	0.1195	0.1175	0.1839	0.2876	0.3585	0.2441	0.1637	0.1715	0.1946	0.2508	0.1206	0.2441	0.1596	0.1679	0.2369	0.1505	0.234	0.2876	0.2592	0.261	0.1456	0.2028	0.199	0.2305	0.2032	0.2571		0.1772	0.193	0.128	0.0511	0.2876	0.1351	0.2267	0.2587		0.1968	0.1231
CNKSR1	1239	AA	6.1	5	6.2	0	0.9703	0.1498	0.0168	0.9887	0.961	0.973	0.9736	1	1	1	1	1	1	0.9919	1	1	1	1	1	1	1	1	0.9808	1	1	1	1	0.9811	0.9859	1	1	1		0.9648	0.9342	0.938	1	1	1	1		0.9849	1
CNKSR1	1240	AD	1.2	1.1	2.2	0	0.9511	0.6032	0.0886	0.8567	0.611	0.6314	0.8072	0.8483	0.8749	0.6405	0.7299	0.7731	0.8605	0.8329	0.8233	0.7956	0.7277	0.7247	0.8044	0.9005	0.7741	0.8589	0.8389	0.7669	0.7755	0.7612	0.8134	0.6916	0.8398	0.7576	0.8152		0.9005	0.7299	0.7247	0.7933	0.7551	0.8876	0.853	0.6902		0.7217	1
CEP85	1243	RI	14.3	14.2	14.4	0	1	0.0282	0.0024	1	1	1	1	1	1	1	1	1	1	1	1	1	1	1	1	1	1	1	1	1	1	1	1	1	1	1	1	1	1	1	1	1	1	1	1	1	1	1	1
CEP85	1244	AA	14.1	13	14.2	0	0.9075	0.6171	0.1	0.2865	0.1949	0.1901	0.2269	0.4204	0.1991	0.3259	0.3882	0.2661	0.1903	0.3296	0.2208	0.1824	0.525	0.3006	0.2281	0.1078	0.3692	0.2956	0.353	0.1769	0.2339	0.2661	0.3188	0.2711	0.3855	0.1769	0.369	0.5371	0.4916	0.392	0.1519	0.2165	0.3559	0.2753	0.2323	0.17	0.4293	0.2835	0.4293
CEP85	1245	ES	3	2	4	0	0.9843	0.0626	0.0045	1	1	1	1	1	1	1	1	1	1	1	1	1	1	1	1	1	1	1	1	1	1	1	1	1	0.9761	1	1	1	1	1	1	1	1	1	1	1	1	0.9789	1
SH3BGRL3	1246	RI	2.2	2.1	2.3	0	1	0.0923	0.0102	0.0234	0.0204	0.0176	0.0136	0.0226	0.0201	0.0226	0.0148	0.021	0.0181	0.0182	0.0281	0.0104	0.031	0.0241	0.0314	0.0203	0.0219	0.0346	0.0184	0.0235	0.0218	0.0122	0.024	0.0289	0.0495	0.0109	0.021	0.0187	0.0097	0.0206	0.0185	0.0134	0.0109	0.0199	0.0193	0.0243	0.0224	0.0242	0.0166
UBXN11	1249	AT	12.2			0	1	0.7665	0.1452	0.7354	0.5957	0.3851	0.6073	0.6909	0.4948	0.4883	0.4951	0.5879	0.5961	0.6597	0.3229	0.1155	0.548	0.5184	0.4669	0.3929	0.5321	0.6262	0.6791	0.4087	0.4311	0.5997	0.5952	0.3002	0.5052	0.5676	0.6395	0.6427	0.521	0.3944	0.627	0.4988	0.1197	0.6296	0.033	0.4215	0.5741	0.5378	0.2325
UBXN11	1250	AT	17			0	1	0.7665	0.1452	0.2646	0.4043	0.6149	0.3927	0.3091	0.5052	0.5117	0.5049	0.4121	0.4039	0.3403	0.6771	0.8845	0.452	0.4816	0.5331	0.6071	0.4679	0.3738	0.3209	0.5913	0.5689	0.4003	0.4048	0.6998	0.4948	0.4324	0.3605	0.3573	0.479	0.6056	0.373	0.5012	0.8803	0.3704	0.967	0.5785	0.4259	0.4622	0.7675
UBXN11	1251	ES	10	9	11	0	0.9948	0.3347	0.0428	0.9487	1	1	0.9606	0.9484	0.9788	0.9171	1	0.9138	0.97	0.9248	0.9411	0.9764	0.9747	0.917	1	1	0.9869	0.9057	0.9265	1	1	0.9237	0.9598	0.9675	0.9624	0.9551	0.9307	1	0.8532	0.9466	0.9568	1	1	0.9781	1	1	1	0.9129	1
UBXN11	1252	ES	7:8:9:10	6	11	0	0.9965	0.2848	0.0237	1	1	1	1	1	1	1	1	1	0.9707	0.9929	0.9687	1	1	1	1	1	1	0.9662	1	1	1	0.9855	1	0.984	1	1	1	1	1	1	0.7152	1	1	0.9795	1	0.9623	1	0.9772	1
UBXN11	1254	ES	6	5	7	0	0.9965	0.7015	0.1103	0.5407	0.4746	0.6134	0.5503	0.4396	0.4295	0.5021	0.5176	0.5984	0.6688	0.6162	0.4813	0.3982	0.7167	0.4555	0.5087	0.5304	0.3089	0.4922	0.5467	0.4543	0.4516	0.49	0.5292	0.6796	0.3832	0.4688	0.6	0.3433	0.5049	0.5779	0.3704	0.684	0.5405	0.5329	0.5698	0.5451	0.5405	0.7147	0.4124
UBXN11	1255	ES	3:4:5:6:7:8:9	2	10	0	0.8499	0.9862	0.2459	1	1	0.7169	0.7174	0.7525	0.2959		0.3505		0.5624	0.8012	0.5043	0.4999	1	1	0.2716	0.3341	0.3429	0.2185	0.2854	1		0.4311	0.6512	0.7409	0.3661	1	0.7341	0.4865	1	0.3943			0.7771	1	0.5875	0.5228		0.2744	0.6119
UBXN11	1256	ES	4:5:6:7:8:9	2	10	0	0.993	0.8254	0.1139	1	1	0.9087	0.9323	0.9041	0.8095	0.8847	0.9229	0.8841	0.8625	0.9352	0.8899	0.6245	1	1	0.649	0.4845	0.7515	0.7962	0.8469	1	0.9072	0.752	0.9038	0.9566	0.5373	1	0.9313	0.8333	1	0.8293	0.7266	0.812	0.8737	1	0.8563	0.8229	1	0.7284	0.9072
UBXN11	1257	ES	5:6:7:8:9	2	10	0	0.7818	0.9323	0.2327	1			0.7997	0.7951	0.2691		0.6529	0.6274	0.5857	0.7349	0.6528	0.7809		1		0.5005	0.3249	0.3725	0.4548			0.2085		0.7897	0.383	1	0.5825					0.6748	0.7184	1		0.5101	1	0.1697	0.64
UBXN11	1258	ES	3:4:5:7:8:9	2	10	0	0.8674	0.961	0.2164	1	1	0.7257	0.7647	0.8744	0.5028		0.4598		0.4996	0.7947	0.6382	0.6548	1	1	0.3363	0.6038	0.6196	0.2861	0.4082	1	0.5691	0.5366	0.6953	0.6976	0.5941	1	0.7325	0.7919	1	0.4452	0.6174		0.8188	1	0.5614	0.5757		0.2123	0.7583
UBXN11	1259	ES	4:5:7:8:9	2	10	0	0.9913	0.6224	0.0847	1	1	0.9046	0.9437	0.9521	0.9102	0.9198	0.9466	0.9196	0.8213	0.9314	0.9314	0.7595	1	1	0.724	0.7082	0.9032	0.8462	0.9012	1	0.9505	0.8194	0.9193	0.945	0.7315	1	0.9305	0.9513	1	0.8533	0.9018	0.7376	0.8996	1	0.8462	0.8502	1	0.6497	0.9507
UBXN11	1260	ES	5:7:8:9	2	10	0	0.7522	0.8812	0.2119	1			0.8183	0.878	0.4644		0.7158	0.6931	0.4848	0.7174	0.7508	0.8735		1		0.6664	0.5957	0.4488	0.5612			0.277		0.7363	0.5602	1	0.5794	0.7334				0.5691	0.768	1		0.5576	1	0.1188	0.7765
UBXN11	1261	ES	03:04:00	2	5	0	0.8726	0.9379	0.2034	0.8372	0.8217	1	0.4568	0.5541	0.5578		0.2687		0.5537	0.6353	0.3885	0.262	1	0.5248	0.7378	0.4207	0.5655	0.3623	0.3772	0.7277		0.7847	0.8757	0.4897	0.5476	0.5955	0.6931	0.6319	0.8806	0.7746			0.6138	0.4098	1	0.5481	0.0843	0.6742	0.5362
UBXN11	1262	ES	4	2	5	0	0.993	0.6524	0.091	0.9091	0.9352	1	0.8024	0.762	0.9239	1	0.88	0.8411	0.842	0.852	0.8244	0.3476	1	0.8699	0.9311	0.538	0.8744	0.8798	0.8837	0.9342	1	0.9296	0.9705	0.8699	0.6863	0.8588	0.9124	0.8892	0.936	0.9579	1	0.6898	0.7464	0.7307	1	0.8277	0.734	0.9328	0.8651
UBXN11	1263	ES	3	2	4	0	0.9337	0.6624	0.1072	0.3865	0.2844	0.2977	0.2091	0.2924	0.1154	0.0252	0.0557		0.2266	0.2698	0.1495	0.4383	0.3737	0.191	0.1986	0.398	0.1856	0.0891	0.0841	0.1786	0.0858	0.2634	0.2069	0.1563	0.4164	0.2279	0.2117	0.1942	0.3737	0.1712	0.191		0.3826	0.2366	0.2372	0.2533		0.1551	0.1852
LIN28A	1271	RI	4.2	4.1	4.3	0	1	0.469	0.1058	0.7729	0.7478	1	1	0.9162	0.7834	1	0.8921	0.8986	0.7949	1	0.93	1	1	0.874	1	1	1	0.9742	0.9526	1	1	0.9354	0.8904	0.8692	0.7699	1	0.8219	1	0.8052	1	1	1	1	1	1	1	1	1	0.8297
DHDDS	1272	AT	6.2			0	1	0.2134	0.0332	0.1515	0.071	0.0672	0.0368	0.0613	0.0632	0.117	0.0532	0.1397	0.0891	0.0496	0.0708	0.0716	0.1209	0.0802	0.0878	0.0613	0.1287	0.183	0.0965	0.0309	0.0853	0.0962	0.0631	0.0908	0.0978	0.0498	0.0751	0.1601	0.1846	0.1156	0.1581	0.1285	0.077	0.1085	0.1371	0.1457	0.1262	0.1219	0.1044
DHDDS	1273	AT	10.2			0	1	0.5122	0.0722	0.7216	0.8811	0.8979	0.857	0.6961	0.8242	0.7658	0.8509	0.6724	0.8049	0.8551	0.8437	0.7991	0.7796	0.8193	0.7911	0.7521	0.7729	0.6529	0.7017	0.8901	0.8142	0.828	0.824	0.8198	0.8064	0.8482	0.8173	0.7551	0.7024	0.7764	0.6846	0.771	0.8282	0.7478	0.7859	0.7735	0.7132	0.7969	0.814
DHDDS	1274	AT	7			0	1	0.4321	0.0564	0.1268	0.0478	0.0349	0.1062	0.2426	0.1126	0.1172	0.0959	0.1879	0.106	0.0953	0.0855	0.1293	0.0995	0.1005	0.121	0.1865	0.0984	0.1641	0.2019	0.079	0.1006	0.0758	0.1129	0.0895	0.0958	0.102	0.1076	0.0847	0.113	0.108	0.1574	0.1005	0.0948	0.1438	0.0771	0.0807	0.1606	0.0812	0.0816
DHDDS	1275	AA	10.1	9	10.2	0	0.9948	0.4916	0.0719	0.3136	0.2503	0.2664	0.1479	0.2038	0.1062	0.3373	0.1925	0.1947	0.114	0.1769	0.1866	0.2501	0.2745	0.2789	0.1587	0.0939	0.1769	0.224	0.2789	0.2551	0.2711	0.1862	0.2724	0.1816	0.1795	0.1253	0.2529	0.0776	0.2903	0.2555	0.1947	0.2627	0.2438	0.2231	0.244	0.2308	0.3006	0.1665	0.2545
DHDDS	1276	ES	6.1	5	8	0	0.9983	0.3359	0.0418	0.9482	0.937	0.9101	0.9352	0.8811	0.9487	0.878	0.9347	0.8633	0.9325	0.941	0.8964	0.8949	0.9417	0.9138	0.9645	0.8617	0.9468	0.8756	0.8997	0.9131	0.9379	0.8662	0.8637	0.9381	0.9521	0.8892	0.9331	0.9218	0.891	0.9719	0.9367	0.9656	0.8909	0.9252	0.9175	0.9327	0.9376	0.9313	0.9146
DHDDS	1277	ES	5	4.2	6.1	0	1	0.0531	0.005	1	1	1	0.9941	1	1	1	1	1	1	0.9927	1	1	0.9847	1	1	1	1	1	1	0.9902	1	1	1	1	0.9949	1	1	1	1	0.986	1	1	1	1	0.9909	1	1	1	1
DHDDS	1278	AA	4.1	3	4.2	0	0.993	0.3544	0.0476	0.04	0.0532	0.0239	0.0714	0.0173	0	0.0185	0.0242	0.0575	0.0139	0.0481	0.0553	0.0273	0.0415	0.0285	0.0428	0.0156	0.0555	0.0709	0.0589	0.0089	0.0492	0.0437	0.0093	0.0329	0.0524	0.0326	0.0357	0	0.0575	0.0169	0.0536	0.0296	0	0.0318	0	0.0486	0.0204	0.0372	0.0433
RPS6KA1	1279	AP	3			0	0.9983	0.3141	0.0443	0.1656	0.0145	0.0066	0.025	0.053	0.0172	0.023	0.0335	0.1508	0.0257	0.0033	0.0288	0.0071	0.0164	0.0397	0	0.0263	0.0266	0.0816	0.0321	0.0064	0.0109	0.1321	0.1077	0.0129	0.0492	0.023	0.021	0.0053	0.058	0	0.0882	0.0341	0.0638	0.066	0.0054	0.0125	0	0.0174	0.0144
RPS6KA1	1280	AP	1			0	0.9983	0.9266	0.1957	0.5271	0.6065	0.5526	0.3823	0.5964	0.2804	0.6609	0.7816	0.6202	0.759	0.241	0.6121	0.5011	0.5137	0.3943	0.5561	0.3265	0.4813	0.7724	0.3007	0.4386	0.3558	0.486	0.4899	0.4656	0.5277	0.4618	0.399	0.0789	0.2952	0.3254	0.6709	0.8796	0.5542	0.655	0.2944	0.4421	0.4276	0.6998	0.2165
RPS6KA1	1281	AP	7			0	0.9983	0.8855	0.1796	0.2656	0.2615	0.3613	0.4209	0.305	0.6253	0.2173	0.1632	0.1919	0.1324	0.6541	0.2884	0.3695	0.2012	0.4976	0.3442	0.5567	0.355	0.1272	0.4855	0.3566	0.4838	0.3418	0.3098	0.3882	0.3892	0.3966	0.4242	0.8611	0.4846	0.5476	0.1145	0.0569	0.2309	0.2286	0.654	0.5025	0.4797	0.2229	0.6806
RPS6KA1	1282	AP	5			0	0.9983	0.6037	0.0705	0.0417	0.1176	0.0794	0.1718	0.0456	0.0771	0.0988	0.0216	0.0371	0.0829	0.1016	0.0707	0.1224	0.2686	0.0684	0.0997	0.0906	0.1372	0.0187	0.1817	0.1984	0.1495	0.0401	0.0927	0.1333	0.0339	0.1186	0.1557	0.0547	0.1623	0.1269	0.1264	0.0293	0.151	0.0505	0.0462	0.0429	0.0927	0.0599	0.0885
RPS6KA1	1286	AA	16.1	15	16.2	0	0.9983	0.0675	0.0087	0.9949	0.996	1	1	0.9793	0.9932	1	1	1	1	0.9755	0.9842	0.9972	1	1	0.9793	1	0.9914	0.995	0.9912	1	1	0.995	0.99	0.9941	0.9946	1	0.9873	1	1	1	0.9799	1	0.9905	0.9936	1	0.9819	1	1	0.9929
RPS6KA1	1287	ES	12	11	13	0	0.993	0.2402	0.0178	0.0142	0.0074	0	0.0155	0.0078	0.0081	0	0.0078	0.0405	0.0022	0.004	0.0021	0.0039	0.0124	0	0.0229	0	0.0052	0.0095	0	0.0044	0.0089	0.0261	0	0.0034	0.0117	0	0.0086	0.0173	0.0135	0.0077	0.0124	0.0251	0	0.0272	0	0		0.0085	0
RPS6KA1	1289	ES	8	4	9	0	0.9983	0.0904	0.0106	1	0.9964	1	1	0.9888	1	1	1	1	0.9942	1	0.9965	0.9889	1	1	1	1	1	1	0.9913	1	1	0.9958	0.9835	1	1	1	0.9934	1	1	1	1	1	1	1	0.98	1	1	0.9959	1
RPS6KA1	1290	ES	08:09:00	4	10	0	0.9983	0.1804	0.0088	0.9955	1	0.9943	1	1	1	1	1	1	0.9896	1	1	1	1	1	1	1	1	0.9962	1	1	1	1	1	1	1	1	1	1	1	1	1	1	1	1	1	1	1	1	1
RPS6KA1	1292	ES	2	1	4	0	0.9162	0.5176	0.0386	0.0054	0.0149	0	0	0.0324	0	0	0.0069	0.1372	0.0031	0.0241	0.0094	0.0042	0	0	0	0	0.0122	0.0249	0.0136	0	0	0.0103	0.0412	0.0071	0.0136	0	0.0038		0	0	0	0	0	0.0258	0	0.0195		0.0172	0
ARID1A	1293	AP	2.1			0	0.9581	0.911	0.1469	0.0558	0.0345	0.0663	0.0779	0.0725	0	0	0	0.0759	0.0843	0.0709	0	0	0.0444	0	0	0	0.0822	0	0	0	0	0	0	0	0	0.0429	0.1977	0	0	0	0	0	0	0.1543	0	0		0	0
ARID1A	1295	AP	1			0	0.9581	0.911	0.1469	0.9442	0.9655	0.9337	0.9221	0.9275	1	1	1	0.9241	0.9157	0.9291	1	1	0.9556	1	1	1	0.9178	1	1	1	1	1	1	1	1	0.9571	0.8023	1	1	1	1	1	1	0.8457	1	1		1	1
ARID1A	1296	AA	18.1	17	18.2	0	1	0.0544	0.0047	0.9928	1	0.9885	1	0.9913	1	1	1	1	1	1	0.9957	1	1	1	0.9911	1	1	1	1	1	1	1	0.9942	0.9923	0.9963	1	1	1	1	1	1	1	1	1	1	1	1	1	1
ARID1A	1297	ES	18.1:18.2	17	19	0	1	0.0161	0.0017	1	1	1	1	1	1	1	1	1	1	1	1	1	1	1	1	1	1	1	1	0.994	1	1	1	1	1	1	1	1	1	1	1	1	1	1	1	1	1	1	1
PIGV	1299	AP	1			0	0.9599	0.8833	0.1726	0.3077	0.6723	0.3257	0.4907	0.5241	0.5281	0.2518	0.4003	0.3936	0.4523	0.4587	0.4889	0.2526	0.245	0.2518	0.2211	0.3354	0.5038	0.4043	0.4423	0.5196	0.476	0.4001	0.302	0.4907	0.6219	0.5648	0.4157	0.6023	0.476	0.4378	0.3354	0	0.7518	0.4731	0.5571	0.2941	0.3354	0.496	0.5089
PIGV	1300	AP	2.1			0	0.9599	0.8833	0.1726	0.6923	0.3277	0.6743	0.5093	0.4759	0.4719	0.7482	0.5997	0.6064	0.5477	0.5413	0.5111	0.7474	0.755	0.7482	0.7789	0.6646	0.4962	0.5957	0.5577	0.4804	0.524	0.5999	0.698	0.5093	0.3781	0.4352	0.5843	0.3977	0.524	0.5622	0.6646	1	0.2482	0.5269	0.4429	0.7059	0.6646	0.504	0.4911
PIGV	1301	RI	4.2	4.1	4.3	0	1	0.1632	0.0217	1	1	1	1	0.9753	0.9828	1	0.9592	1	0.9843	0.9867	0.9747	0.9858	1	0.9762	0.9482	1	0.9842	0.9741	0.9912	0.9541	1	0.9893	1	0.9766	1	1	1	1	1	1	0.9629	1	0.9713	0.9311	0.9827	0.9671	1	0.955	0.9904
PIGV	1302	AD	2.3	2.2	3	0	0.8429	0.8536	0.2292	0.767	0.7275	0.7136	0.8974	0.5884	0.4069	1	0.3752	1	0.9568	0.5667	0.4561	0.4168	0.4617		0.5932	0.3398	0.5785	0.8178	0.8046	0.2554	1	0.5272	1	0.7652	0.733	1	0.7102	1	1	1		1		0.7201	0.8563	0.6619	1	0.706	0.8109
PIGV	1303	AD	2.2:2.3	2.1	3	0	0.9267	0.9864	0.163	0.3412	0.2944	0.2824	0.3724	0.2984	0.169	0.3826	0.1156	0.3435	0.4284	0.3246	0.1757	0.134	0.3146		0.1897		0.2059	0.5347	0.3146	0.1998	0.4524	0.3817	0.5873	0.398	0.3955	0.3355	0.4093	0.3737	1	0.271	0.2924	0.2064		0.2507	0.4747	0.247	0.4078	0.2452	0.2677
ZDHHC18	1305	AP	2			0	0.9791	0.3866	0.0236	0	0	0	0	0	0	0	0	0	0	0	0	0	0	0	0	0	0	0	0	0	0	0	0	0	0	0	0	0	0	0	0	0	0	0	0	0	0	0	0
ZDHHC18	1306	AP	1			0	0.9791	0.3866	0.0236	1	1	1	1	1	1	1	1	1	1	1	1	1	1	1	1	1	1	1	1	1	1	1	1	1	1	1	1	1	1	1	1	1	1	1	1	1	1	1	1
GPN2	1307	AP	1.1			0	0.9895	0.5873	0.0711	0.8818	0.8542	0.9629	0.9643	0.9557	0.9585	0.9786	0.9749	0.9487	0.9916	0.9305	0.932	1	0.9314	1	0.8599	0.944	0.9375	0.9474	0.9161	0.9574	0.8913	0.9455	0.8949	0.9175	0.9832	1	0.807	1	1	0.9209	0.9191	1	1	0.7611	1	0.9291	1	0.9675	1
GPN2	1308	AP	3			0	0.9895	0.5873	0.0711	0.1182	0.1458	0.0371	0.0357	0.0443	0.0415	0.0214	0.0251	0.0513	0.0084	0.0695	0.068	0	0.0686	0	0.1401	0.056	0.0625	0.0526	0.0839	0.0426	0.1087	0.0545	0.1051	0.0825	0.0168	0	0.193	0	0	0.0791	0.0809	0	0	0.2389	0	0.0709	0	0.0325	0
GPN2	1311	RI	1.2	1.1	1.3	0	0.9913	0.0263	0.0014	1	1	1	1	1	1	1	1	1	1	1	1	1	1	1	1	1	1	1	1	1	1	1	1	1	1	1	1	1	1	1	1	1	1	1	1	1	1	1	1
SLC9A1	1312	AT	12			0	1	0.6824	0.0681	0.9247	0.9631	0.9697	0.9605	0.937	0.9629	0.9476	0.948	0.9575	0.9441	0.9161	0.9743	0.9968	0.945	0.9691	0.9727	0.961	0.9618	0.9532	0.8718	0.9683	0.9762	0.9791	0.9345	0.9786	0.9438	0.9897	0.9436	0.8917	0.92	0.9361	0.8563	0.9832	0.9943	0.8754	0.9358	0.9626	0.8748	0.9481	0.9865
SLC9A1	1313	AT	5.2			0	1	0.6824	0.0681	0.0753	0.0369	0.0303	0.0395	0.063	0.0371	0.0524	0.052	0.0425	0.0559	0.0839	0.0257	0.0032	0.055	0.0309	0.0273	0.039	0.0382	0.0468	0.1282	0.0317	0.0238	0.0209	0.0655	0.0214	0.0562	0.0103	0.0564	0.1083	0.08	0.0639	0.1437	0.0168	0.0057	0.1246	0.0642	0.0374	0.1252	0.0519	0.0135
SLC9A1	1314	ES	2	1	3	0	0.9983	0.2972	0.0164	1	1	1	0.9953	1	1	1	1	1	0.9947	1	1	0.9947	1	1	1	1	1	0.9822	0.9676	1	0.9911	0.9943	1	0.9899	0.9876	0.9913	1	1	0.9631	1	1	1	1	0.9722	1	0.9785	1	1	1
WDTC1	1317	RI	16.2	16.1	16.3	0	1	0.0146	0.0011	1	1	1	1	1	0.9935	1	1	1	0.9971	1	0.9979	1	1	1	1	1	1	1	1	1	1	1	1	1	1	1	1	1	1	1	1	1	1	1	1	1	1	1	1
WDTC1	1318	AA	15.1	14	15.2	0	1	0.1332	0.0215	0.983	0.962	0.9906	0.948	0.9625	0.9663	1	0.9793	0.9785	0.9299	0.9662	0.9177	0.9575	0.9799	0.9373	0.9762	0.9881	0.9826	0.9563	0.9618	0.9492	0.9813	0.9727	0.9659	1	0.9708	0.9819	0.9855	0.94	0.9847	0.8994	1	0.9644	0.9694	0.9923	0.9008	0.9867	0.9492	0.9754	0.9782
WDTC1	1319	AA	11.1	10	11.2	0	0.993	0.2562	0.0302	0.9382	0.9405	0.9184	0.9454	0.9512	0.9222	0.9442	0.9461	0.9846	0.9621	0.9213	0.9555	0.9144	0.9484	0.9236	0.9416	0.9617	0.9647	0.9199	1	0.948	0.961	0.9375	0.9158	0.9412	0.945	0.9895	0.9384	1	0.957	0.9656	0.9355	0.9263	1	0.9504	0.9798	0.9687	1	0.9518	0.9612
SYTL1	1320	AP	1			0	0.9965	1	0.1257	0.6705	0.8447	0.9591	0.8236	0.8163	0.9154	0.9171	0.9315	0.7783	0.9045	0.8223	0.9313	0.9923	0.8553	0.9416	0.8023	0.8551	0.9577	0.8253	0.8582	0.9895	0.9746	0.8981	0.7548	0.926	0.9192	0.8645	0.8093	0.8701	0.9397	0.9254	0.9743	0.9405	1	0.9657	0.9771	0.8406	0.8388	0.8896	0.9646
SYTL1	1321	AP	2.1			0	0.9965	1	0.1257	0.3295	0.1553	0.0409	0.1764	0.1837	0.0846	0.0829	0.0685	0.2217	0.0955	0.1777	0.0687	0.0077	0.1447	0.0584	0.1977	0.1449	0.0423	0.1747	0.1418	0.0105	0.0254	0.1019	0.2452	0.074	0.0808	0.1355	0.1907	0.1299	0.0603	0.0746	0.0257	0.0595	0	0.0343	0.0229	0.1594	0.1612	0.1104	0.0354
SYTL1	1322	AA	6.1	5	6.2	0	0.9808	0.3686	0.0548	1	0.898	0.8835	0.9407	0.9141	0.9128	0.9086	0.883	0.9131	0.8987	0.923	0.9418	0.8523	0.8908	0.9415		0.8541	0.9095	0.898	0.9321	0.8817	0.7156	0.8981	0.9445	0.8708	0.9235	0.9235	0.9398	0.9141	0.9259	0.872	0.8646	0.8882	0.9022	0.9521	0.8569	0.8866	0.7681	0.9303	0.9289
MAP3K6	1323	ES	3	2	4	0	0.9337	0.8299	0.1584	0.7205	0.6268	0.5349	0.727	0.541	0.3099	0.4692	0.3548	0.8319	0.7053	0.7565	0.541	0.8946	0.7133	0.6585	0.7237	0.7448	0.9672	0.5211	0.3745	0.7971		0.5561	0.7388	0.6471	0.5193	0.5758	0.6335		0.7833	0.6387	0.9303	0.7971	0.5649	0.8484		0.5261		0.6358	0.6325
MAP3K6	1324	RI	1.2	1.1	1.3	0	0.9197	0	0	1	1	1	1	1	1		1	1	1	1	1	1	1	1	1	1	1	1	1	1	1	1	1	1	1	1	1	1	1	1	1		1	1		1		1	1
FCN3	1325	ES	4	3	5	0	0.8517	0.5789	0.0702	0.8763	0.9152	0.8666	0.8136	0.8755	0.8991		0.9463	0.7179	0.8318	0.6995	0.8675	0.9114	1	0.7591	0.8593	0.8136	1	0.7887	0.8358	0.8451		0.8358	0.8889	0.9028	0.9125	0.9325	0.8858	0.8358	0.9125	0.9627	0.8136			0.8724	0.9298	0.8983		0.8588	0.9083
CD164L2	1326	AT	3.4			0	0.904	0.1717	0.0082	0	0	0	0	0	0	0	0	0	0	0	0	0	0	0		0	0	0	0		0	0		0	0	0	0	0	0	0	0	0	0	0	0	0		0	0
CD164L2	1327	AT	4.3			0	0.904	0.1717	0.0082	1	1	1	1	1	1	1	1	1	1	1	1	1	1	1		1	1	1	1		1	1		1	1	1	1	1	1	1	1	1	1	1	1	1		1	1
CD164L2	1328	RI	4.2	4.1	4.3	0	0.9284	0.8432	0.2033	0.7341	0.5376	0.879	1	0.4807	0.6408	0.4948	0.5654	0.5242	1	0.803	0.844	0.4292	0.7135	0.6132		0.2717	0.2434	0.7057	0.2423	1	0.8174	0.7548	0.5574	0.542	0.8451	1	0.6945	0.5832	0.1709	1	0.7399	0.3588	0.6115	0.3042	0.6539	0.7816		0.4924	0.3956
WASF2	1330	ES	8	7	9	0	1	0.0485	0.0043	1	1	1	1	1	1	0.9907	1	0.9915	1	1	1	0.9977	1	1	1	1	0.9966	1	1	0.9957	1	1	1	1	0.9966	0.9964	0.9976	1	1	0.9913	1	1	1	1	1	1	1	1	1
AHDC1	1331	ES	00:03:04.100000	2	4.2	0	0.822	1	0.2284	0.6137	0.4758	0.7904	0.608	0.4653	0.6854	0.6632	0.9161	0.522	0.7366	0.7272	0.606	0.4498	0.5782	0.629	0.681	0.495	0.6979	0.4819	1	0.5455	0.6828	0.4918	0.7251	0.8541	0.6979	0.2928	0.5306		0.6818	0.3865			0.5322	0.4369	1	0.7898		0.095
FGR	1332	AP	3			0	0.8743	0.7786	0.105	0.3391	0.2305	0.2104	0.251	0.1895	0.1083	0.1332	0		0.2905	0.1721	0.1528	0.2292	0.192	0.1284	0.219	0.0822	0.2308	0.3189	0.2087	0.2469	0.1234	0.1122	0.1763	0.1536	0.1834	0.302	0.2405	0.0752	0.0698	0.0987			0.2962	0.3388	0.2238	0.1677		0.1343	0.2015
FGR	1333	AP	5.1			0	0.8743	0.4582	0.0578	0.0978	0.0443	0	0.0165	0	0	0	0		0.0187	0.0894	0.1651	0	0.1729	0.1156	0	0	0	0	0.047	0.0834	0.0952	0.0433	0.0476	0	0	0	0.018	0.0203	0	0.0444			0	0.0572	0	0		0	0.0145
FGR	1334	AP	1			0	0.8743	0.9439	0.1486	0.4508	0.6742	0.7245	0.723	0.8105	0.873	0.8668	0.8506		0.4117	0.7078	0.6821	0.7297	0.5358	0.7561	0.611	0.9178	0.5902	0.6261	0.5823	0.6697	0.672	0.8197	0.7214	0.7935	0.7907	0.6767	0.6585	0.8812	0.8761	0.7803			0.7038	0.4726	0.7762	0.8323		0.8241	0.7774
FGR	1335	AP	2			0	0.8743	0.6093	0.094	0.1123	0.0509	0.065	0.0095	0	0.0187	0	0.1494		0.2791	0.0308	0	0.041	0.0993	0	0.17	0	0.1791	0.055	0.162	0	0.1094	0.0249	0.0547	0.053	0.0259	0.0213	0.0829	0.0233	0.0541	0.0766			0	0.1314	0	0		0.0417	0.0067
FGR	1336	ES	7.2:8	7.1	9	0	0.9948	0.2131	0.0102	1	1	1	1	1	0.9805	1	1	1	1	0.9951	1	0.9953	1	1	1	1	1	1	1	1	1	1	1	1	1	1	1	1	1	0.9878	1	1	1	1	1	1	0.7869	1	0.9971
IFI6	1337	AD	2.3	2.2	3	0	0.9703	0.4231	0.0625	0.1728	0.1529	0.091	0.1658	0.0955	0.2108	0.0711	0.175	0.2175	0.2939	0.2191	0.2108	0.139	0.1816	0.1215	0.1803	0.1367	0.1253	0.1189	0.1071	0.1953	0.2167	0.1596	0.2119	0.2014	0.228	0.1955	0.1966	0.1246	0.1888	0.1723	0.1579	0.1839	0.1795	0.0532	0.2065	0.2107	0.1166	0.1709	0.1395
IFI6	1338	AD	2.2:2.3	2.1	3	0	0.993	0.1788	0.0194	0.0352	0.037	0.0194	0.0396	0.0276	0.0482	0.0175	0.0435	0.0383	0.0874	0.0611	0.0569	0.03	0.0504	0.0281	0.0404	0.0403	0.0256	0.0232	0.0266	0.0536	0.0535	0.0348	0.0363	0.0481	0.0464	0.0434	0.0448	0.0374	0.0449	0.033	0.0395	0.0534	0.0437	0.0145	0.0424	0.0495	0.0274	0.0485	0.034
IFI6	1339	AD	2.2	2.1	3	0	0.9983	0.416	0.0351	0.1691	0.203	0.1891	0.1918	0.235	0.1712	0.1865	0.1884	0.1449	0.1954	0.2042	0.1899	0.1787	0.2096	0.1887	0.1668	0.2197	0.1698	0.1638	0.1954	0.2112	0.1889	0.17	0.134	0.1787	0.1658	0.1672	0.1672	0.2224	0.1809	0.1673	0.1893	0.2169	0.187	0.2048	0.1692	0.1839	0.1845	0.2121	0.1895
FAM76A	1340	AT	10			0	1	0.327	0.0572	0.8619	0.9573	0.9842	0.9494	0.9521	0.8599	1	0.9609	0.9654	0.9008	0.8884	0.9815	1	0.9226	0.9678	0.8999	1	0.9167	0.9035	0.8799	0.9294	0.9054	0.9224	0.9506	0.9542	0.9753	0.9746	0.9426	0.9487	0.9701	0.9795	0.9214	0.9688	0.9735	0.8848	0.9519	0.9297	0.9195	0.9593	0.9667
FAM76A	1341	AT	9.2			0	1	0.327	0.0572	0.1381	0.0427	0.0158	0.0506	0.0479	0.1401	0	0.0391	0.0346	0.0992	0.1116	0.0185	0	0.0774	0.0322	0.1001	0	0.0833	0.0965	0.1201	0.0706	0.0946	0.0776	0.0494	0.0458	0.0247	0.0254	0.0574	0.0513	0.0299	0.0205	0.0786	0.0312	0.0265	0.1152	0.0481	0.0703	0.0805	0.0407	0.0333
FAM76A	1342	ES	7	6	8	0	0.9948	0.57	0.1011	0.8852	0.8371	0.7999	0.8042	0.8627	0.7012	0.5443	0.794	0.6747	0.7393	0.7822	0.879	0.6598	0.8009	0.6935	0.8794	0.8716	0.8879	0.7085	0.7234	0.9021	0.7737	0.7702	0.898	0.8042	0.8564	0.9432	0.8341	0.674	0.795	0.7418	0.8856	0.8157	0.6111	0.9385	0.7967	0.794	0.8782	0.6527	0.8213
FAM76A	1343	ES	5	4	6	0	0.9983	0.1636	0.0181	0.9798	1	1	0.9801	1	1	1	1	1	0.9895	1	0.9731	0.9767	1	1	1	1	1	1	1	1	1	1	0.957	1	1	1	1	1	1	1	1	1	1	0.9824	1	0.9866	1	0.984	1
FAM76A	1344	ES	3	2	4	0	0.9895	0.8581	0.1606	0.4591	0.2362	0.289	0.3766	0.5366	0.2025	0.2578	0.3165	0.3018	0.3863	0.3912	0.247	0.3018	0.6984	0.3341	0.252	0.5366	0.3317	0.2612	0.4809	0.2648	0.2816	0.36	0.4592	0.305	0.3548	0.4099	0.6091	0.4099	0.5463	0.2175	0.3165	0.3165	0.2884	0.4057	0.2269	0.3063	0.2748	0.4547	0.3871
PPP1R8	1345	ES	4	3	5	0	1	0.0553	0.0075	0.9921	0.9969	0.9963	0.9975	1	0.9972	0.9945	1	1	1	0.9859	0.9979	0.9925	0.9904	1	1	1	1	0.99	0.9954	0.9943	1	1	1	0.9963	0.9865	0.9907	0.994	0.9948	1	0.985	0.9927	1	1	1	0.9758	0.9966	0.9804	0.9908	1
PPP1R8	1347	AD	1.2:1.3	1.1	2	0	0.9913	0.7962	0.0848	0.0426	0.0948	0.138	0.179	0.0346	0.1412	0.1885	0.1052	0.0272	0.1193	0.1084	0.1895	0.0831	0.1123	0.0303	0.1273	0.2446	0.2244	0.1859	0.0792	0.0892	0.04	0.1881	0.0788	0.0823	0.1833	0.1127	0.0944	0.181	0.0261	0.157	0.18	0.075	0.1566	0.1001	0.141	0.0714	0.2105	0.2088	0.0808
PPP1R8	1348	AD	1.2	1.1	2	0	0.9581	0.3527	0.0572	0.0243	0	0.0514	0.0909	0.0282	0.036	0	0.1009	0.1076	0	0.1501	0.0817	0.0702	0	0.1925	0.066	0	0.025	0.08	0.0764	0.0367	0.032	0.0369	0.0903	0.0781	0.1151	0.0473	0.1501	0	0.0687	0.0311	0	0.049	0	0	0.021	0.0391	0	0.0808	0
THEMIS2	1349	RI	4.2	4.1	4.3	0	0.9983	0.0909	0.0134	0.9717	1	0.9825	0.9934	0.9812	0.9913	1	0.9664	1	0.9838	1	1	0.9912	1	0.9844	1	1	0.9777	0.9921	0.9774	1	0.9665	0.9899	1	0.9922	0.996	0.9676	0.993	1	0.9846	0.9921	1	1	1	1	0.9728	0.9882	1	0.9864	0.9936
THEMIS2	1350	ES	4.1:4.2:4.3	3	5	0	1	0.1853	0.0281	0.9877	0.9364	0.9848	0.9685	1	0.9913	0.9859	0.956	1	0.9779	0.9838	0.9849	0.9551	1	0.9715	0.9694	0.975	0.9638	0.8801	0.9719	0.9659	0.9851	0.9307	1	0.9852	0.9663	0.9716	0.9868	0.9286	0.9843	0.9723	0.9739	1	0.9719	0.9788	0.977	0.9792	0.8911	0.962	0.9713
THEMIS2	1352	ES	3:4.1:4.2:4.3	2	5	0	1	0.3129	0.0531	0.9215	0.8701	0.9088	0.9211	0.8642	0.8624	0.9858	0.8577	1	0.8689	0.9278	0.9557	0.927	0.9793	0.9314	0.9393	0.9407	0.8822	0.7157	0.8644	0.9612	0.8773	0.9123	1	0.9011	0.9378	0.986	0.9288	0.7089	0.9412	0.9051	0.9432	1	0.9447	1	0.8646	0.8768	0.8046	0.917	0.9248
THEMIS2	1354	ES	3	2	5	0	0.7906	1	0.207	0.1914	0.4548	0.2164	0.398	0	0.0925	0.6737	0.3134		0.1834	0.2698	0.3755	0.5093		0.4949	0.6738	0.3818	0.3096	0.396	0.2432	0.6099	0.1712	0.6065		0.2383	0.4832	0.7659	0.2416	0.2589	0.2882	0.3086	0.5185		0.4828	1	0.1796	0.1938		0.4173	0.3986
RPA2	1357	RI	1.3	1.2	1.4	0	0.9878	0.4118	0.0285	0.0163	0	0	0.0241	0.0055	0.0037	0	0.0069	0.0244	0.0089	0.0058	0.0033	0.005	0.0062	0	0.0038	0	0.0104	0.0026	0.0116	0.0171	0.0046	0.0055	0.0059	0.0166	0.0087	0	0.0182	0	0.0033	0	0	0	0.0067	0.0076	0	0.0046	0	0.0147	0.0047
RPA2	1359	AD	1.2	1.1	1.4	0	0.9983	0.1532	0.0146	1	1	1	0.9903	1	0.989	1	0.976	1	0.996	0.9895	0.9907	0.9891	1	0.9774	0.976	1	1	0.9915	1	1	1	0.975	1	0.9822	0.9901	1	1	1	1	0.9772	1	1	1	1	0.9809	0.9857	1	1	0.9943
SMPDL3B	1360	AT	7.2			0	1	0.5541	0.0948	0.259	0.1621	0.263	0.444	0.1798	0.2158	0.3686	0.1662	0.1439	0.1142	0.3011	0.2289	0.1183	0.2305	0.2814	0.2937	0.1698	0.2145	0.0795	0.0803	0.1985	0.1932	0.2517	0.1612	0.1658	0.2494	0.1305	0.1781	0.3231	0.157	0.1748	0.2814	0.1191	0.2203	0.0824	0.2797	0.2265	0.1691	0.0694	0.1114
SMPDL3B	1361	AT	8			0	1	0.5541	0.0948	0.741	0.8379	0.737	0.556	0.8202	0.7842	0.6314	0.8338	0.8561	0.8858	0.6989	0.7711	0.8816	0.7695	0.7186	0.7063	0.8302	0.7855	0.9205	0.9197	0.8015	0.8068	0.7483	0.8388	0.8342	0.7506	0.8695	0.8219	0.6769	0.843	0.8252	0.7186	0.8809	0.7797	0.9176	0.7203	0.7735	0.8309	0.9306	0.8886
SMPDL3B	1362	ES	4	3.2	5	0	1	0.0215	0.0016	1	1	1	1	1	1	1	1	1	1	1	1	1	1	1	1	1	1	1	1	1	1	1	1	1	0.9983	1	1	1	1	1	1	1	1	1	1	1	1	1	1
SMPDL3B	1363	AA	3.1	2	3.2	0	0.9808	0.3563	0.0362	0.0185	0.0098	0.0281	0.0171	0.0779	0.0097	0.0098	0.0018	0.0155	0	0.0318	0.0227	0.0078	0.038	0.015	0.0127	0.0051	0.0036	0.0031	0.0169	0.0127	0.0091	0.0168	0.0292	0.0061	0.0138	0.0283	0.0326	0.0165	0.0539	0.0034	0.0225	0	0.0067	0.0349	0.0101	0.0199	0.0345	0	0.0156
EYA3	1366	AT	18			0	1	0.2837	0.0318	0.0102	0.0275	0	0.0278	0.0147	0	0	0.0298	0.0532	0.0263	0.0594	0.0173	0.0275	0.0289	0.0205	0.0125	0.0204	0.0251	0.0367	0.0335	0.0188	0	0.0096	0	0	0	0.0163	0.0197	0	0	0	0.0693	0.0737	0	0.0369	0.0326	0	0.0516	0.0238	0
EYA3	1367	AT	19			0	1	0.2837	0.0318	0.9898	0.9725	1	0.9722	0.9853	1	1	0.9702	0.9468	0.9737	0.9406	0.9827	0.9725	0.9711	0.9795	0.9875	0.9796	0.9749	0.9633	0.9665	0.9812	1	0.9904	1	1	1	0.9837	0.9803	1	1	1	0.9307	0.9263	1	0.9631	0.9674	1	0.9484	0.9762	1
EYA3	1368	AA	10.1	9	10.2	0	0.7923	0.0859	0.0072	1	1	1	1	1	1	1	1	1	1	1	1	1	1	1	1	1	1	1	1	1	1	1	1	1	1	1	1		1	1	1	1	1	1		1	1	1	1
EYA3	1369	ES	7	6	8	0	0.9424	0.9204	0.133	0.466	0.4304	0.3548	0.5817	0.5935	0.4121	0.3336	0.4894	0.3772	0.4378	0.4378	0.6881	0.3901	0.5935	0.36	0.422	0.4121	0.36	0.7818	0.3248	0.4831	0.3487	0.3497	0.4378	0.476	0.4021	0.3274	0.4897	0.4378	0.3225	0.182	0.2325	0.4053	0.3772	0.6403	0.5238	0.5312	0.5881	0.3772	0.4378
EYA3	1370	ES	06:07:00	5	8	0	0.918	0.3498	0.0209	1	1	1	1	1	1	1	1	1	0.9498	1	1	1	1	1	1	1	1	1	1	1	1	1	1	1	1	1	1	1	1	1	1	1	1	1	1	1	1	1	1
EYA3	1371	ES	6	5	8	0	0.9721	0.1224	0.0068	1	1	1	1	1	1	1	1	1	0.9741	1	1	1	1	1	1	1	1	1	1	1	1	1	1	1	1	1	1	1	1	1	1	1	1	1	1	1	1	1	1
EYA3	1372	ES	4	3	5	0	0.9511	0.5339	0.0491	0.9506	0.9592	0.9625	0.9468	1	0.9544	1	1	0.9509	0.9522	0.8903	0.9665	1	1	1	0.9351	1	0.9522	0.9575	0.9496	1	1	0.9382	0.9748	1	0.9461	1	0.9801	1	1	1	1		0.9234	1	0.9304	1	1	0.9758	1
EYA3	1374	ES	3	2	4	0	0.8831	0.0692	0.0033	1	1	1	1	1	1	1	1	1	1	1	1	1	1	1	1	1	1	1	1	1	1	1	1	1	1	1	1	1	1	1	1	1		1	1	1		1	1
ATPIF1	1378	AT	3			0	1	0.1186	0.0141	0.0097	0.0155	0.0071	0.0178	0.0275	0.0125	0.0083	0.0128	0.0238	0.01	0.0168	0.0107	0.0048	0.0196	0.0166	0.0059	0.01	0.0137	0.0329	0.0499	0.017	0.0049	0.0171	0.0098	0.0044	0.0116	0.0178	0.0168	0.0108	0.0093	0.0058	0.0048	0.0074	0.0045	0.0078	0.0041	0.0049	0.0061	0.0027	0.0043
ATPIF1	1379	AT	2.4			0	1	0.1186	0.0141	0.9903	0.9845	0.9929	0.9822	0.9725	0.9875	0.9917	0.9872	0.9762	0.99	0.9832	0.9893	0.9952	0.9804	0.9834	0.9941	0.99	0.9863	0.9671	0.9501	0.983	0.9951	0.9829	0.9902	0.9956	0.9884	0.9822	0.9832	0.9892	0.9907	0.9942	0.9952	0.9926	0.9955	0.9922	0.9959	0.9951	0.994	0.9973	0.9957
ATPIF1	1380	RI	2.2	2.1	2.3	0	1	0.732	0.1138	0.9731	0.8618	0.898	0.7713	0.6581	0.94	0.8407	0.5817	0.5818	0.9306	0.9298	0.9006	0.7431	0.9642	0.8578	0.6152	0.831	0.8151	0.8165	0.7536	0.8135	0.9541	0.9085	1	0.8132	1	0.7535	0.8007	0.6665	1	0.9507	0.7889	1	0.7409	1	0.9779	0.8373	0.9565	0.9908	0.8792
ATPIF1	1381	RI	2.2:2.3	2.1	2.4	0	1	0.7312	0.0793	0.2066	0.158	0.0833	0.0647	0.0747	0.1831	0.1283	0.0155	0.0634	0.1451	0.0997	0.0837	0.069	0.3189	0.1449	0.0414	0.0896	0.0377	0.0697	0.1149	0.1336	0.2168	0.1091	0.1035	0.125	0.164	0.055	0.0985	0.0258	0.0545	0.1044	0.0299	0.0347	0.0647	0.055	0.0363	0.0433	0.0871	0.0536	0.0676
ATPIF1	1382	AA	2.3	2.1	2.4	0	1	0.2011	0.0194	0.0085	0.0359	0.0137	0.0227	0.0452	0.0157	0.0306	0.018	0.0479	0.0138	0.009	0.0123	0.033	0.0188	0.0298	0.0416	0.0236	0.0119	0.0212	0.0483	0.0355	0.014	0.0133	0	0.0401	0	0.0219	0.0302	0.0182	0	0.0066	0.0126	0	0.0341	0	0.0011	0.0124	0.0069	0.0006	0.0112
MED18	1383	RI	3.2	3.1	3.3	0	1	0.0438	0.008	1	0.9939	1	1	1	1	1	1	0.9864	1	1	0.9952	1	1	0.9798	1	1	0.9937	1	0.9828	1	0.9835	1	1	1	0.9742	1	0.9919	1	1	0.9823	0.9862	0.9878	1	0.9917	1	0.9913	1	0.9926	1
PHACTR4	1384	AP	1			0	0.9634	0.986	0.165	0.3257	0.6656	0.4667	0.6658	0.7192	0.5049	0.6789	0.6203	0.7735	0.5487	0.3606	0.6111	0.8663	0.5132	0.6456	0.7512	0.5012	0.6156	0.8605	0.8843	0.7863	0.5458	0.6126	0.5819	0.7806	0.8126	0.6771	0.6658	0.8885	0.4839	0.7062	0.4967	1	0.6949	0.7649	0.5059	0.2817		0.3555	0.5324
PHACTR4	1385	AP	3			0	0.9634	0.986	0.165	0.6743	0.3344	0.5333	0.3342	0.2808	0.4951	0.3211	0.3797	0.2265	0.4513	0.6394	0.3889	0.1337	0.4868	0.3544	0.2488	0.4988	0.3844	0.1395	0.1157	0.2137	0.4542	0.3874	0.4181	0.2194	0.1874	0.3229	0.3342	0.1115	0.5161	0.2938	0.5033	0	0.3051	0.2351	0.4941	0.7183		0.6445	0.4676
RCC1	1386	AP	1			0	1	0.8375	0.1532	0.8046	0.5381	0.531	0.5802	0.7978	0.6082	0.6863	0.6171	0.585	0.3541	0.4669	0.383	0.5266	0.783	0.3559	0.5131	0.7	0.5615	0.7738	0.8436	0.1503	0.6226	0.7502	0.7	0.6256	0.7812	0.5706	0.6897	0.7361	0.6789	0.5017	0.6248	0.5583	0.4545	0.8253	0.4563	0.6945	0.8372	0.477	0.8113
RCC1	1387	AP	5			0	1	0.8375	0.1532	0.1954	0.4619	0.469	0.4198	0.2022	0.3918	0.3137	0.3829	0.415	0.6459	0.5331	0.617	0.4734	0.217	0.6441	0.4869	0.3	0.4385	0.2262	0.1564	0.8497	0.3774	0.2498	0.3	0.3744	0.2188	0.4294	0.3103	0.2639	0.3211	0.4983	0.3752	0.4417	0.5455	0.1747	0.5437	0.3055	0.1628	0.523	0.1887
RCC1	1388	ES	7	6	8	0	0.9913	0.9716	0.1241	0.4153	0.3945	0.2134	0.1698	0.3619	0.2542	0.2258	0.2387	0.3044	0.112	0.2089	0.2475	0.3303	0.3271	0.3528	0.0678	0.3847	0.1937	0.165	0.3012	0.1772	0.3457	0.2891	0.3271	0.2465	0.1491	0.3933	0.2596	0.1856	0.2813	0.2115	0.1353	0.2883	0.1148	0.2995	0.1541	0.2772	0.1659	0.1196	0.4995
TAF12	1389	AD	1.2	1.1	2	0	1	0.453	0.0477	0.0866	0.0597	0.0473	0.0394	0.0374	0.0664	0.1281	0.0527	0.0765	0.0517	0.0364	0.0674	0.0579	0.1003	0.0567	0.0477	0.0407	0.0463	0.1254	0.0971	0.07	0.0418	0.0655	0.0318	0.0864	0.0944	0.0544	0.0831	0.0418	0.1143	0.0381	0.0839	0.0975	0.0287	0.0952	0.0411	0.025	0.0161	0.0639	0.0458
GMEB1	1390	AA	3.1	2.2	3.2	0	0.8168	1	0.1513	0.3721	0.4399	0.5506	0.39		0.4092	0.7322	0.3535	0.528	0.3389	0.3008	0.3231	0.185	0.4272	0.3321	0.3737	0.2892	0.3255	0.3022	0.3789	0.4986	0.4272	0.2572	0.4986	0.3179	0.6722	0.3587	0.4858			0.1756		0.6911		0.3986	0.3055	0.3859		0.2801	0.3986
YTHDF2	1394	ES	2	1.3	3	0	1	0.0585	0.008	0.9797	0.9949	1	0.9888	1	1	1	1	1	1	0.9964	1	0.9937	1	0.9876	1	0.9848	1	0.9913	1	1	1	0.991	0.9763	1	1	0.9891	1	1	1	1	1	1	1	1	0.992	1	1	0.9948	0.9763
YTHDF2	1395	RI	1.2	1.1	1.3	0	0.9599	0.0886	0.0098	1	0.9761	1	1	1	1	1	1	1	0.9792	1	1	1	1	1	1	1	1	1	0.9711	1	1	1	1	1	1	1	1	1	1	1	1	1	1	1	1	1	1	1	1
EPB41	1396	AP	2			0	0.8778	0.5516	0.0605	0.0917	0.1122	0	0	0	0.0319	0	0	0	0	0.044	0	0	0	0.0312	0	0.0807	0.0601	0.0307	0.0402	0	0	0.0289	0.0322	0	0	0	0.0416		0	0		0	0	0.0368				0.0649	0
EPB41	1397	AP	3			0	0.8778	0.778	0.1123	0	0.0952	0.1742	0.068	0.0806	0.0481	0.1306	0.0722	0.0258	0.3466	0.0663	0	0.0177	0.0196	0.2444	0.2919	0.1215	0.2171	0.2036	0.0968	0.0404	0	0.0522	0	0.1101	0.1194	0.0748	0.1002		0.231	0.2123		0	0.0477	0.0444				0.0978	0.0722
EPB41	1398	AP	1			0	0.8778	0.778	0.125	0.9083	0.7926	0.8258	0.932	0.9194	0.9199	0.8694	0.9278	0.9742	0.6534	0.8896	1	0.9823	0.9804	0.7244	0.7081	0.7978	0.7228	0.7657	0.8631	0.9596	1	0.9189	0.9678	0.8899	0.8806	0.9252	0.8582		0.769	0.7877		1	0.9523	0.9187				0.8373	0.9278
EPB41	1399	AT	19.2			0	1	0.082	0.0108	0.0381	0.0043	0	0.0037	0	0.0032	0	0	0.0051	0.0124	0.0059	0.0034	0.0061	0.007	0.028	0.0199	0.0076	0	0	0.0041	0.0077	0.0266	0	0.006	0.0065	0	0.0302	0.0027	0	0	0.02	0	0	0	0.0153	0.026	0	0	0	0.0164
EPB41	1400	AT	24			0	1	0.082	0.0108	0.9619	0.9957	1	0.9963	1	0.9968	1	1	0.9949	0.9876	0.9941	0.9966	0.9939	0.993	0.972	0.9801	0.9924	1	1	0.9959	0.9923	0.9734	1	0.994	0.9935	1	0.9698	0.9973	1	1	0.98	1	1	1	0.9847	0.974	1	1	1	0.9836
EPB41	1401	ES	21	20	22	0	1	0.1799	0.0187	0.986	0.9671	0.9828	0.9775	0.9869	0.9905	0.9591	1	1	0.9898	0.9638	0.981	1	0.9868	0.9875	0.9503	0.9846	0.9876	0.9903	0.9657	0.9905	1	0.9463	0.9662	0.9672	0.9853	0.9881	0.9865	1	1	0.9704	0.9714	1	0.9689	0.9125	0.9562	0.979	0.9026	1	1
EPB41	1403	ES	20	19.1	21	0	0.9983	0.2356	0.0269	0.9896	0.965	0.9038	1	0.9779	0.9596	0.9694	0.9575	0.93	0.9478	0.9309	0.9769	0.9213	0.9152	0.9851	0.9704	0.8991	0.9566	0.9646	0.9577	0.9768	0.9452	0.9893	0.9267	0.9858	0.9832	0.9845	0.9836	0.8902	0.9705	0.9027	0.9643	0.9375	0.9846	0.9557	1	1	1	0.9886	0.9786
EPB41	1410	ES	16:17:18	15	19.1	0	0.7522	1	0.1907	0	0.0357	0.0763	0.1097	0.2706	0.1493			0.0554	0.3873	0.158	0.0764	0.1382		0	0.1353	0.0577	0	0.3364	0	0.3639	0.3951	0.0336	0.1264	0.2495	0.1002	0	0.0806		0.0539	0.1234			0.1793	0.1828	0.1546			0.2695	0.3196
EPB41	1411	ES	16:18:00	15	19.1	0	0.8691	1	0.2651	0.3941	0.5845	0.5429	0.3115	0.2473	0.651	0.89	0.5555	0.5241	0.8261	0.3981	0.3376	0.4608	0.5083	0.469	0.2956	0.2065	0.1894	0.8176	0.175	0.3873		0.2746	0.5779	0.6179	0.1581	0.393	0.3608		0	0.1927			0.3732	0.583	0.1911	0.2776		0.7642	0
EPB41	1412	ES	18	15	19.1	0	0.9284	1	0.2294	0.648	0.5532	0.5273	0.6129	0.5021	0.7236	0.917	0.7578	0.577	0.9291	0.6947	0.6657	0.6901	0.7558	0.3054	0.7808	0.5095	0.1508	0.687	0.3123	0.5335	0.6949	0.5025	0.7736	0.6962	0.5652	0.2698	0.5812	0.3222	0.4057	0.2311	0.8034	0.8157	0.7987	0.7513	0.2367	0.5648		0.4163	0.288
EPB41	1413	ES	16	15	19.1	1	0.7766	0.8431	0.2028	0.7309	0.6802	0.5359	0.3318	0.4358	0.757		0.5811	0.7975	0.7248	0.6455	0.4095	0.6716	0.7036	0.5055		0.4383	0.3128	0.6295	0.2541	0.5451	0.5527	0.6761	0.7543	0.6356	0.3626	0.5965	0.4354		0.4671	0.5847	0.7223	0.8662	0.8285	0.7773				0.6938	0.394
EPB41	1414	ES	7	6	8	0	0.9756	0.2742	0.0296	1	0.9719	1	1	1	0.9785	0.9394	1	0.9751	0.9632	0.9809	0.9803	1	1	1	1	0.973	1	0.9813	1	1	0.9603	0.9363	0.9825	0.9765	0.9454	1	1	1	0.8201	0.9447	1	1	0.9509	0.973	1	1		0.9658	1
EPB41	1415	ES	5	4.2	6	0	0.815	0.3438	0.0254	0	0	0	0	0	0.0465	0	0	0	0	0.0123	0.0475	0	0	0.0223	0	0	0	0	0	0	0	0	0	0	0	0	0	0	0	0		0	0	0		0		0	0
SRSF4	1422	ES	08:09:00	7	10	0	1	0.0092	0.001	1	1	1	1	1	1	1	1	1	1	1	1	1	1	1	1	1	1	1	1	1	1	1	1	1	1	1	1	1	1	1	1	1	1	1	1	1	1	1	1
SRSF4	1424	ES	6	5	7	0	1	0.8297	0.1099	0.1823	0.077	0.0444	0.0894	0.1907	0.0644	0.0444	0.0565	0.3468	0.1992	0.0939	0.0731	0.0326	0.1002	0.1243	0.0589	0.0595	0.0756	0.1096	0.0503	0.0509	0.0383	0.1056	0.0456	0.0234	0.0686	0.1345	0.2373	0.1182	0.1449	0.0536	0.0102	0.0071	0.0104	0.2036	0.0042	0.0707	0.1124	0.0202	0.0184
SRSF4	1425	ES	02:03:04	1	5	0	1	0.9984	0.166	0.4027	0.1448	0.0918	0.2008	0.4368	0.086	0.2074	0.1621	0.4998	0.2185	0.1719	0.135	0.0299	0.2356	0.3025	0.0695	0.1349	0.218	0.1308	0.3243	0.0817	0.0702	0.1721	0.1233	0.0725	0.212	0.2572	0.2978	0.2857	0.2023	0.1338	0.1727	0.1355	0.045	0.2817	0.0016	0.2377	0.2659	0.1091	0.1054
MECR	1426	AA	2.1	1	2.2	0	0.993	0.9072	0.1152	0.1467	0.1823	0.2593	0.3727	0.2977	0.209	0.191	0.1472	0.2764	0.2043	0.2629	0.3697	0.1818	0.2022	0.2467	0.1103	0.2467	0.2248	0.2873	0.2854	0.2447	0.0928	0.221	0.332	0.1838	0.3049	0.2467	0.2196	0.3571	0.2242	0.2403	0.1883	0.2509	0.1385	0.3312	0.2622	0.355	0.4717	0.2628	0.2492
PTPRU	1427	AA	31.1	30	31.2	0	0.9668	0.1324	0.0134	1	0.9944	0.9673	0.9914	0.9938	1	1	0.9825	0.9912	0.9669	0.9873	0.9866	0.9789	1	1		1	0.9911	0.9907	0.9838	0.9763	0.9727	0.9917	1	0.9809	1	1	0.9952	1	1	1	1	1	0.9802	1	1		0.9409	1	1
PTPRU	1428	AD	23.2	23.1	24	0	0.9389	0.5773	0.0884	0.6456	0.5784	0.6542	0.6763	0.6287	0.6533	0.833	0.7124	0.6858	0.6399	0.7048	0.6655	0.5057	0.7223	0.7075	0.7313	0.6245	0.7347	0.6466	0.6329	0.5853	0.5314	0.73		0.6632	0.7728	0.6792	0.5342	0.6447	0.5877	0.5884	0.5853		0.7159	0.753	0.6456		0.5764	0.3618	0.5558
PTPRU	1430	ES	21	19	22	0	0.911	0.0767	0.0058	0	0	0	0	0	0		0	0	0	0	0	0	0	0	0	0	0	0	0	0	0	0		0.0097	0	0	0		0	0	0		0	0	0			0	0
PTPRU	1431	ES	20	19	22	0	0.911	0.0702	0.0035	0	0	0	0	0	0		0	0	0	0	0	0	0	0	0	0	0	0	0	0	0	0		0	0	0	0		0	0	0		0	0	0			0	0
PTPRU	1432	ES	15	14	16	0	0.9023	0.7885	0.0606	0	0	0	0	0	0		0	0	0.0053	0	0	0	0	0	0	0	0.0096	0.0049	0	0	0.0153	0.0041		0	0	0	0	0	0	0	0	0	0	0	0		0.7885	0	0
SDC3	1436	RI	2.2	2.1	2.3	0	0.9825	1	0.0886	0.0864	0.0552	0.0205	0.0601	0.0858	0.0526	0.0706	0.0217	0.0374	0.0271	0.0719	0.0291	0.0136	0.0806	0.0714	0.0527	0.0401	0.0277	0.058	0.1381	0.0302	0.0205	0.0364	0.129	0.037	0.057	0.0539	0.0648	0.0186	0.0293	0.0406	0.0436	0.0067	0.0344	0.0489	0.0322	0.0516	0.0186	0.0561	0.0315
PUM1	1443	AD	18.2	18.1	19	0	0.9965	0.4926	0.0725	0.4403	0.377	0.5316	0.4859	0.5714	0.4591	0.5169	0.514	0.4125	0.4803	0.475	0.4435	0.4919	0.4586	0.3867	0.5562	0.5121	0.528	0.5226	0.4391	0.5437	0.4835	0.5281	0.4032	0.4955	0.614	0.5169	0.4211	0.5291	0.4713	0.621	0.5489	0.5354	0.4643	0.5056	0.457	0.4985	0.4452	0.4382	0.6066
PUM1	1445	AA	14.1	13	14.2	0	0.9965	0.4747	0.0634	0.8448	0.836	0.854	0.842	0.8231	0.8495	0.9007	0.8145	0.7719	0.7831	0.8285	0.8517	0.8377	0.9054	0.8524	0.742	0.8451	0.7559	0.8895	0.8436	0.8053	0.7946	0.8713	0.8904	0.9248	0.7739	0.7997	0.7943	0.8474	0.9214	0.82	0.7997	0.8212	0.848	0.7774	0.8764	0.6898	0.7412	0.8281	0.8936
PUM1	1446	ES	13	12	14.1	0	0.9983	0.1018	0.0098	1	1	1	0.9943	1	1	1	1	1	1	0.9893	0.9947	1	0.986	1	1	0.962	1	1	1	1	1	1	1	0.9907	1	1	1	1	1	1	1	1	1	1	1	1	1	1	1
PUM1	1447	AA	10.1	9	10.2	0	0.9215	0.8186	0.1116	0.4235	0.4111	0.3923	0.2978	0.45	0.4293	0.4362	0.4644	0.4916	0.1621	0.4348	0.3343	0.4304	0.4433	0.4119	0.3724	0.4716	0.3259	0.45	0.3128	0.5473	0.4204	0.2727	0.2835	0.3967	0.4271	0.3495	0.525		0.5371	0.5134	0.4916	0.2835	0.6031	0.3823	0.4133	0.244		0.4037	0.5593
PUM1	1448	ES	06:07:08	5	9	0	0.9983	0.1034	0.0056	1	1	0.9929	1	1	1	0.9861	1	1	1	1	0.9962	1	1	1	1	1	1	1	1	0.9934	1	1	1	1	1	0.9912	1	1	1	1	1	1	1	1	1	1	1	1	1
PUM1	1449	ES	5:6:7:8	4	9	0	0.9983	0.1561	0.0181	1	0.9727	0.9929	0.9734	0.9889	0.9864	0.9577	0.994	0.9829	0.9876	0.9961	0.9887	0.9833	0.9713	0.9745	0.99	0.9583	1	0.9764	1	0.987	1	0.9754	0.9726	0.9747	0.9915	0.9824	1	0.9638	0.9771	0.9585	0.9696	1	0.9697	0.992	1	0.9634	1	0.9594	1
PUM1	1450	ES	07:08:00	4	9	0	0.8464	0.786	0.1846	1	0.7843	0.89	0.5912	0.5828	0.6277	0.6541	0.9177	0.8422	0.8399	0.9313	0.6743	0.6188	0.4042	0.5801	0.8843	0.6447	1	0.876		0.8541	1	0.75	0.6495	0.6463	0.9071	0.8057	1	0.7652	0.5633	0.7222	0.7034	1	0.5506	0.8063	1			0.3552	1
PUM1	1452	ES	05:06:00	4	7	0	0.9983	0.2338	0.0321	0.9614	0.9136	0.9528	0.9658	0.987	0.9786	0.9341	0.9433	0.923	0.9491	0.9551	0.9793	0.9756	0.9809	0.9702	0.9318	0.9362	0.9768	0.8606	1	0.9342	0.9639	0.938	0.9556	0.9608	0.93	0.9409	0.9711	0.8965	0.9738	0.9041	0.9354	0.9601	0.9666	0.9723	0.7902	1	1	0.98	0.944
PUM1	1453	ES	3	2.2	4	0	0.9442	0.5363	0.0541	0.0509	0.0341	0.0198	0.0061	0.0449	0.025	0	0	0.0139	0.0236	0.0042	0.0165	0	0.0159	0.0143	0	0.0561	0	0	0	0.0116	0.1236	0.0083	0.0067	0.0102	0.0057	0.0159	0.0265	0.0659	0	0.0185	0.0534	0.0197	0.0179	0	0	0.0727		0.0105	0.0239
PUM1	1455	AD	2.2	2.1	4	0	0.986	0.2403	0.0161	1	1	1	1	0.9832	1	0.9806	1	1	0.9852	0.9958	0.9945	1	1	1	1	1	1	0.9913	1	1	1	0.9942	1	0.9895	1	1	0.9871	1	0.9753	0.9838	1	0.9846	0.9806	0.9875	1	0.9747	1	0.9563	0.9788
PUM1	1456	AD	1.2	1.1	2.1	0	0.9738	0.1615	0.0226	0.9834	0.9901	0.9865	0.9894	0.9768	0.9722	1	1	0.9689	1	0.9797	0.9195	0.9609	0.9792	0.9825	1	0.9738	0.9782	0.9875	0.9861	0.9744	1	0.9921	0.9925	0.9675	1	0.9839	0.9786	1	1	1	1	0.9745	1	0.9852	1	1		1	1
SNRNP40	1457	AP	7.1			0	0.9983	0.9454	0.0931	0.0435	0.0117	0.0064	0.0251	0.0216	0.0061	0.0032	0.001	0.0356	0.012	0.0097	0.0038	0.0042	0.008	0.0183	0.0092	0.0105	0.0186	0.0061	0.0246	0.0192	0.0037	0.0101	0.0385	0.0034	0.0138	0.0241	0.0111	0.0027	0.0135	0.0039	0.0037	0	0.0063	0.0216	0.0018	0.0037	0.0092	0.0017	0.0015
SNRNP40	1458	AP	1			0	0.9983	0.9454	0.0931	0.9565	0.9883	0.9936	0.9749	0.9784	0.9939	0.9968	0.999	0.9644	0.988	0.9903	0.9962	0.9958	0.992	0.9817	0.9908	0.9895	0.9814	0.9939	0.9754	0.9808	0.9963	0.9899	0.9615	0.9966	0.9862	0.9759	0.9889	0.9973	0.9865	0.9961	0.9963	1	0.9937	0.9784	0.9982	0.9963	0.9908	0.9983	0.9985
SNRNP40	1459	ES	10	9	11	0	1	0.716	0.069	0.1777	0.0984	0.0597	0.1221	0.1205	0.0814	0.0915	0.0899	0.1957	0.1135	0.1318	0.0916	0.0841	0.2238	0.1161	0.0906	0.1298	0.0904	0.0692	0.1699	0.0986	0.0747	0.0939	0.1094	0.1009	0.1219	0.1306	0.1058	0.0882	0.0993	0.0366	0.0545	0.0668	0.0706	0.0966	0.052	0.0419	0.0761	0.0687	0.0998
ZCCHC17	1460	AD	7.2	7.1	8	0	1	0.2685	0.0181	0	0	0.0102	0.0089	0	0	0	0	0	0.0024	0.0072	0	0	0	0	0	0.0125	0.0035	0	0	0.0075	0.0068	0.0079	0	0.0034	0.0035	0	0	0	0	0	0.0035	0	0	0.0028	0	0	0.007	0.0073	0.0052
ZCCHC17	1461	ES	3	2	4	0	1	0.7959	0.0729	0.0982	0.1542	0.1088	0.1866	0.1059	0.1144	0.1114	0.092	0.1744	0.0576	0.1893	0.0722	0.1345	0.1684	0.1273	0.111	0.1278	0.167	0.0734	0.2004	0.2252	0.1168	0.0771	0.1115	0.1465	0.1368	0.2063	0.0883	0.0878	0.1244	0.1101	0.1088	0.138	0.0946	0.1066	0.1108	0.1322	0.0986	0.0939	0.1811
ZCCHC17	1463	ES	02:03:00	1.1	4	0	0.9389	0.6876	0.1471	0.9326	0.703	0.6159	0.8992	1	0.794	0.729	0.714	0.5872	0.5496	0.7917	0.7145	0.8629	1	0.8631	0.4854	0.816	0.8154	0.7922	0.8833	0.7661	0.704	0.8398	0.8278	0.867	0.7119	0.8417	0.6383	0.7756	0.6664	0.908	0.6121	0.6761	1	0.8553	0.8666	0.7144	0.8582	0.7552	0.743
ZCCHC17	1464	ES	1.2:2	1.1	4	0	0.801	0.8237	0.2006	0.8055	0.3821	0.5044	0.8304	1	0.7673	0.516	0.5812	0.3859	0.5962	0.6909	0.7053	0.8363	1	0.8047	0.2522	0.7931	0.5705	0.9002	0.7145	0.5511	0.6121	0.6872	0.6262	0.7712	0.7957		0.6728	0.8259	0.1957	0.9199	0.6626	0.41		0.7353	0.847	0.5041	0.896	0.7452	0.3691
ZCCHC17	1465	ES	2	1.1	4	0	1	0.1531	0.0248	0.9932	0.9364	0.9535	0.9828	1	0.9796	0.9627	0.9732	0.9071	0.9637	0.9615	0.9742	0.9801	1	0.9808	0.9081	0.9814	0.9673	0.9832	0.9758	0.938	0.9618	0.9869	0.9771	0.9868	0.9621	0.9565	0.9651	0.9791	0.953	0.9892	0.9484	0.9345	1	0.9857	0.9853	0.9619	0.985	0.975	0.9476
ZCCHC17	1466	AD	1.2	1.1	2	0	0.9878	0.3687	0.0477	0.0355	0.051	0.0584	0.0987	0.1221	0.0779	0.0453	0.0455	0.0716	0.0666	0.0959	0.0719	0.109	0.0722	0.0913	0.0415	0.0777	0.0527	0.1528	0.0699	0.0828	0.0748	0.0345	0.0456	0.0501	0.1515	0.0271	0.0848	0.1098	0.0141	0.1338	0.1243	0.0563	0.028	0.0487	0.0938	0.0451	0.139	0.082	0.0387
FABP3	1467	ES	3	2	4	0	0.9651	0.3984	0.035	0.0192	0.0276	0.0254	0.0136	0.0117	0.019	0	0.0306		0.0102	0.0328	0.008	0.0105	0.0239	0.0143	0.075	0	0.0083	0.0169	0.017	0.0099	0.0201	0.0252	0.0141	0.0177	0.0648	0.0059	0.0188	0.0196	0.009	0.0101	0.0083	0	0.0128	0.0418	0.0184	0.0077	0	0.0189	0.0088
SERINC2	1468	AP	1			0	0.993	0.4713	0.02	0	0	0	0	0	0	0	0	0	0	0	0	0	0	0	0.0041	0	0	0	0	0	0	0	0	0	0.0026	0.0008	0	0	0	0	0	0	0	0	0	0	0	0	0
SERINC2	1469	AP	3			0	0.993	1	0.098	0.8326	0.9512	0.8962	0.9461	0.94	0.9552	0.9296	0.9443	0.8818	0.8869	0.873	0.8973	0.9396	0.8356	0.9284	0.9541	0.9566	0.9836	0.9326	0.9587	0.97	0.9232	0.8145	0.8979	0.9858	0.9799	0.9477	0.8496	1	0.9313	0.9366	0.9612	0.9218	0.9509	0.8625	0.9194	0.974	0.9332	0.9684	0.9585
SERINC2	1470	AP	2.1			0	0.993	0.0899	0.0042	0	0	0	0	0	0	0	0	0	0	0	0.0009	0	0	0	0	0	0	0	0	0	0.0107	0	0	0	0	0	0	0	0	0	0	0	0	0	0	0	0	0	0
SERINC2	1471	AP	4			0	0.993	1	0.0902	0.1674	0.0488	0.1038	0.0539	0.06	0.0448	0.0704	0.0557	0.1182	0.1131	0.127	0.1018	0.0604	0.1644	0.0716	0.0417	0.0434	0.0164	0.0674	0.0413	0.03	0.0661	0.1855	0.1021	0.0142	0.0175	0.0515	0.1504	0	0.0687	0.0634	0.0388	0.0782	0.0491	0.1375	0.0806	0.026	0.0668	0.0316	0.0415
TINAGL1	1473	AT	4			0	1	0.5665	0.0439	0.078	0.018	0.0035	0.002	0.0179	0.0083	0	0.0041	0.018	0.0042	0.022	0.0061	0.0033	0.0162	0.0158	0	0.007	0.0055	0.0024	0.0534	0.0037	0.0102	0.0079	0.0236	0.0046	0.0098	0.0156	0.0147	0	0	0.0091	0.0024	0.0055	0.0027	0.0048	0	0.0021	0	0.0019	0.0003
TINAGL1	1474	AT	12			0	1	0.5665	0.0439	0.922	0.982	0.9965	0.998	0.9821	0.9917	1	0.9959	0.982	0.9958	0.978	0.9939	0.9967	0.9838	0.9842	1	0.993	0.9945	0.9976	0.9466	0.9963	0.9898	0.9921	0.9764	0.9954	0.9902	0.9844	0.9853	1	1	0.9909	0.9976	0.9945	0.9973	0.9952	1	0.9979	1	0.9981	0.9997
TINAGL1	1476	RI	5.2	5.1	5.3	0	0.9948	0.3144	0.0516	0.176	0.0977	0.028	0.0529	0.0352	0.0227	0.0564	0.0402	0.07	0.0268	0.0744	0.0204	0.0097	0.0233	0.0579	0.0481	0.0179	0.0746	0.0611	0.1079	0.0168	0.0404	0.0447	0.113	0.0269	0.0599	0.049	0.0497	0.0822	0.0084	0.0401	0.0248	0.0467	0.0273	0.0063	0.0212	0.0617	0.0104	0.0489	0.0145
TINAGL1	1477	AA	5.1:5.2	3	5.3	0	0.7592	0.3774	0.0459	1	1	1	1	1	1		1	1	1	1	1	1					1	1	1	1	0.7321	1	1	1	1	0.9433	0.9785			1	1	0.9704				1	1	0.9685
TINAGL1	1478	ES	5.1	3	5.3	0	0.9983	0.0595	0.0042	1	1	1	1	1	1	1	1	1	1	1	1	1	1	1	1	1	1	1	1	1	0.9912	1	1	1	1	0.9981	0.9992	1	1	1	1	0.9991	1	1	1	1	1	0.9989	1
TINAGL1	1479	ES	3	2	5.1	0	0.9983	0.1033	0.0078	1	1	1	1	1	1	1	0.9982	0.9918	1	0.9934	0.9981	0.9992	1	1	1	1	1	0.9944	0.9772	0.9951	1	0.9892	1	1	1	1	0.9991	1	1	1	0.9786	0.9955	0.994	1	1	1	1	1	0.9971
PEF1	1487	AT	3			0	1	0.2398	0.0218	0.0154	0.0045	0.0019	0.0066	0.0132	0.0013	0.0039	0.0035	0.0045	0.0026	0.0078	0.0023	0.0014	0.0014	0.0059	0.0032	0.0057	0.0018	0.0028	0.0126	0.0027	0.0032	0.005	0.0114	0.0006	0.0061	0.0038	0.0058	0.0016	0.0016	0.0014	0.0013	0.0027	0	0.0083	0.0009	0.0034	0.0054	0.0026	0.0026
PEF1	1488	AT	6			0	1	0.2398	0.0218	0.9847	0.9955	0.9981	0.9934	0.9868	0.9987	0.9961	0.9965	0.9955	0.9974	0.9922	0.9977	0.9986	0.9986	0.9941	0.9968	0.9943	0.9982	0.9972	0.9874	0.9973	0.9968	0.995	0.9886	0.9994	0.9939	0.9962	0.9942	0.9984	0.9984	0.9986	0.9987	0.9973	1	0.9917	0.9991	0.9966	0.9946	0.9974	0.9974
COL16A1	1490	AT	45.2			0	1	0.0612	0.0065	0	0	0	0	0	0	0	0	0	0.0053	0	0.004	0	0.0046	0	0	0.0037	0	0.0073	0	0	0	0.0109	0	0	0.0075	0	0.0029	0	0	0	0	0.0067	0	0	0	0	0	0	0
COL16A1	1491	AT	75			0	1	0.0612	0.0065	1	1	1	1	1	1	1	1	1	0.9947	1	0.996	1	0.9954	1	1	0.9963	1	0.9927	1	1	1	0.9891	1	1	0.9925	1	0.9971	1	1	1	1	0.9933	1	1	1	1	1	1	1
COL16A1	1492	ME	47|48	46	49	0	0.9494	0.085	0.0074	1	1	1	1	1	1	1	1	1	1	1	0.9843	1	1	1		1	1	1	1	1	1	1	1	1	1	1	1	1	1	1		1	1	1	1	1		1	1
COL16A1	1493	ES	44	43	45.1	0	0.9302	1	0.2144	0.4858	0.7351	0.7977	0.7149	0.618	0.7213	0.8191	0.6536	0.618	0.6246	0.7191	0.5854	0.6691	0.6117	0.5405	0.7444	0.7639	0.9006	0.5295	0.4302	0.3929	0.5734	0.6899	0.8226	0.7806	0.7097	0.538	0.51	0.5641	0.3929	0.7726		0.7952	0.735	0.5641	0.6811	0.7314		0.7952	0.1599
PTP4A2	1518	ES	7	6	8	0	1	0.08	0.0076	0.985	0.9828	0.9808	0.9909	0.9944	0.9698	0.9864	0.9834	0.983	0.9873	0.9873	0.9768	0.9927	0.987	0.9948	0.9797	0.9838	0.9807	0.9336	0.9876	0.9842	0.9896	0.9816	0.9784	0.9789	0.9776	0.9863	0.9825	0.9865	0.9879	0.9965	0.9833	0.9772	0.9866	0.9804	0.9814	0.9797	0.9728	0.9778	0.9905
PTP4A2	1523	ES	06:07:00	3	8	0	1	0.0221	0.0038	0.9939	0.9901	0.9903	0.9934	0.9977	0.9944	0.9885	0.9954	0.9848	0.9936	0.9928	0.9957	0.9949	1	0.9937	0.9925	0.989	0.9934	0.9779	0.9908	0.9938	0.9935	0.9978	0.9897	0.9907	0.9891	0.9962	0.9926	0.991	0.995	0.9928	0.9948	0.9973	0.9959	0.994	0.985	0.992	0.9811	0.9949	0.9911
PTP4A2	1527	ES	6	3	8	0	0.986	0.7241	0.1191	0.7963	0.7319	0.752	0.6978	0.8054	0.9041	0.6839	0.8557	0.6487	0.7727	0.7498	0.9007	0.7038	1	0.5932	0.8252	0.7205	0.8371	0.8444	0.7019	0.8224	0.747	0.9354	0.7902	0.7841	0.7825	0.8485	0.8015	0.7178	0.8066	0.4448	0.8511	0.9311	0.8627	0.8477	0.6624	0.8085	0.7264	0.8809	0.6152
PTP4A2	1530	ES	6	3	7	0	1	0.028	0.0024	0.9981	0.9989	1	1	1	0.999	0.9959	0.9996	0.996	0.9966	1	1	0.9982	0.9982	1	1	1	0.9988	0.9994	0.999	0.996	1	0.9984	0.9981	0.9973	0.9993	0.9961	1	0.9952	0.9974	1	1	1	0.9985	0.9984	0.9991	0.999	1	0.9995	0.9882
PTP4A2	1531	ES	04:05:00	3	6	0	1	0.0258	0.0022	0.0009	0	0	0.0002	0	0	0	0.0004	0.0003	0	0.0005	0.0003	0.0003	0.002	0	0.0009	0	0	0.0003	0.0019	0.0007	0	0.0013	0.0005	0.0005	0	0	0.0012	0	0	0.0008	0	0	0.0008	0	0.001	0	0.0007	0.0007	0
PTP4A2	1532	ES	5	3	6	0	1	0.0109	0.0019	0.0014	0	0.0038	0.0003	0	0.0015	0	0.0017	0.0005	0.0011	0.0004	0.0009	0.0004	0	0.0019	0.0016	0	0.002	0.0008	0.0031	0.0011	0	0	0.0007	0	0.0026	0	0	0.0019	0	0.0023	0.0042	0	0	0.0006	0.0016	0	0.001	0.0011	0.0047
PTP4A2	1535	ES	03:04:05	2	6	0	0.9895	0.4488	0.0287	0.0116	0	0	0.0031	0	0	0	0.0072	0.0037	0	0.0069	0.0024	0.0021	0.0377	0	0.0051	0	0	0.0019	0.0172	0.0111	0	0.0136	0.0035	0.0058	0	0	0.0099	0	0	0.0065	0	0	0.0082	0	0.0058	0	0.0062	0.0084	0
PTP4A2	1536	ES	03:05:00	2	6	0	0.9913	0.2897	0.0375	0.0355	0	0.0732	0.0039	0	0.0208	0	0.0468	0.0047	0.0142	0.0103	0.0141	0.0027	0	0.0377	0.0164	0	0.0257	0.011	0.0539	0.0138	0	0	0.0044	0	0.0437	0	0	0.0347	0	0.0391	0.0615	0	0	0.0177	0.0194	0	0.0078	0.0257	0.1
PTP4A2	1537	ES	3	2	6	0	1	0.1359	0.0157	0.9621	0.9442	0.9563	0.9613	0.9727	0.9415	0.9117	0.9738	0.95	0.9396	0.9577	0.9303	0.936	0.971	0.9461	0.9216	0.9573	0.9399	0.9177	0.9509	0.9625	0.9486	0.95	0.9289	0.9495	0.9368	0.9542	0.9374	0.9402	0.9382	0.9354	0.9408	0.9658	0.9476	0.959	0.9325	0.9557	0.9328	0.9559	0.9657
KHDRBS1	1542	ES	3	2	4	0	1	0.1027	0.0137	0.977	0.9802	0.9722	0.9753	0.9723	0.9745	0.9724	0.9791	0.9503	0.977	0.9681	0.9737	0.9716	0.9588	0.973	0.9782	0.9739	0.9708	0.9774	0.9549	0.9829	0.96	0.9833	0.9866	0.964	0.9672	0.9173	0.9708	0.9827	0.99	0.9783	0.9927	0.9641	0.9619	0.9769	0.9559	0.9749	0.9723	0.9789	0.9588
TMEM39B	1543	AT	9.2			0	1	0.6797	0.0735	0.234	0.1581	0.0857	0.1585	0.1741	0.1288	0.1372	0.0629	0.2183	0.122	0.1738	0.1024	0.0743	0.2153	0.1749	0.0954	0.1023	0.0917	0.1623	0.2192	0.137	0.1338	0.1349	0.1623	0.1891	0.1445	0.144	0.1087	0.1105	0.1974	0.1156	0.0824	0.0671	0.0505	0.2158	0.0561	0.062	0.1	0.105	0.1461
TMEM39B	1545	AT	10			0	1	0.6797	0.0735	0.766	0.8419	0.9143	0.8415	0.8259	0.8712	0.8628	0.9371	0.7817	0.878	0.8262	0.8976	0.9257	0.7847	0.8251	0.9046	0.8977	0.9083	0.8377	0.7808	0.863	0.8662	0.8651	0.8377	0.8109	0.8555	0.856	0.8913	0.8895	0.8026	0.8844	0.9176	0.9329	0.9495	0.7842	0.9439	0.938	0.9	0.895	0.8539
TMEM39B	1546	ES	6	5	7.2	0	0.9965	0.3411	0.0444	0.9474	0.934	0.9443	0.9802	1	1	0.8731	0.9397	1	1	1	0.9682	0.9456	0.9157	1	1	1	0.9445	0.9117	0.9827	0.9249	1	0.9594	1	1	0.93	1	0.9912	1	1	1	1	1	0.961	0.9409	0.8912	0.9846	1	0.9403	0.9787
TMEM39B	1549	ES	05:06:00	3	7.2	0	0.9895	0.5059	0.0741	0.9398	0.9248	0.7392	0.9879	0.915	0.9116	0.8534	0.8266	0.913	0.9451	0.949	0.9431	0.9359	0.854	0.9148	0.9466	0.8574	0.8583	0.7858	0.9628	0.7887	0.9412	0.7928	0.7661	0.8342	0.8913	0.8828	0.911	0.9333	0.8411	1	1	0.9178	0.8095	1	0.8012	0.8342	0.8898	0.8231	0.9551
KPNA6	1553	AP	1			0	0.925	0.5564	0.0394	0.9886	1	1	1	1	0.9928	0.9762	0.9914	1	1	0.9879	0.9875	1	1	1	0.9746	1	1	0.9794	1	1	1	0.9795	1	0.9767	0.9929	0.947	0.9927	1	1	1		1	1	0.9891	1	1	1	0.9585	1
KPNA6	1554	AP	2			0	0.925	0.4702	0.0358	0.0114	0	0	0	0	0.0072	0.0238	0.0086	0	0	0.0121	0.0125	0	0	0	0	0	0	0.0206	0	0	0	0	0	0.0233	0.0072	0	0.0073	0	0	0		0	0	0.0109	0	0	0	0.0267	0
KPNA6	1555	AP	3			0	0.925	0.1036	0.0118	0	0	0	0	0	0	0	0	0	0	0	0	0	0	0	0.0254	0	0	0	0	0	0	0.0205	0	0	0	0.053	0	0	0	0		0	0	0	0	0	0	0.0149	0
KPNA6	1556	AA	9.1	8	9.2	0	0.9546	0.0282	0.0034	1	1	1	0.9739	1	1	1	1	1	1	1	0.9918	1	1	1	1	1	1	1	1	1	1	1	1	1	1	1	1	1	1	1	1	1	1	1	1	1		1	1
KPNA6	1557	AD	5.2	5.1	6	0	0.9319	0.256	0.0302	1	1	0.9808	1	0.932	1	0.954	0.9739	1	0.9888	0.9922	0.9894	1	1	1	1	1	0.9637	0.975	0.9818	1	1	0.9873	1	0.98	0.9676	1	0.9862	1	1	0.954	1	1	1	1	1	0.9094		0.9557	0.8691
TXLNA	1558	AP	1			0	0.9878	0.9349	0.1156	0.6929	0.726	0.5073	0.5748	0.7372	0.7055	0.5847	0.5776	0.6138	0.631	0.6319	0.5524	0.6759	0.6267	0.6846	0.5562	0.5257	0.6572	0.5137	0.7893	0.7586	0.5897	0.6291	0.7362	0.5971	0.5266	0.7169	0.5913	0.5913	0.6961	0.7371	0.6551	0.7153	0.823	0.9033	0.6303	0.5859		0.7564	0.7237
TXLNA	1559	AP	2.1			0	0.9878	0.9349	0.1156	0.3071	0.274	0.4927	0.4252	0.2628	0.2945	0.4153	0.4224	0.3862	0.369	0.3681	0.4476	0.3241	0.3733	0.3154	0.4438	0.4743	0.3428	0.4863	0.2107	0.2414	0.4103	0.3709	0.2638	0.4029	0.4734	0.2831	0.4087	0.4087	0.3039	0.2629	0.3449	0.2847	0.177	0.0967	0.3697	0.4141		0.2436	0.2763
CCDC28B	1560	AT	3			0	1	0.7919	0.1002	0.1666	0.1187	0.0479	0.0186	0.1484	0.0367	0.017	0.0176	0.2498	0.0384	0.0818	0.0509	0.0172	0.0324	0.0529	0.1662	0.0116	0.1215	0.0279	0.163	0.045	0.0255	0.0842	0.1891	0.0254	0.0467	0.1644	0.0791	0.0154	0.0159	0.0388	0.0027	0.041	0.0096	0.0832	0.0029	0.0093	0.0342	0.0371	0.0865
CCDC28B	1561	AT	6.3			0	1	0.7919	0.1002	0.8334	0.8813	0.9521	0.9814	0.8516	0.9633	0.983	0.9824	0.7502	0.9616	0.9182	0.9491	0.9828	0.9676	0.9471	0.8338	0.9884	0.8785	0.9721	0.837	0.955	0.9745	0.9158	0.8109	0.9746	0.9533	0.8356	0.9209	0.9846	0.9841	0.9612	0.9973	0.959	0.9904	0.9168	0.9971	0.9907	0.9658	0.9629	0.9135
CCDC28B	1562	RI	6.2	6.1	6.3	0	0.9808	1	0.1736	0.3279	0.3991	0.1491	0.0594	0.4824	0.1138	0.0748	0.1084	0.2497	0.1282	0.222	0.0724	0.0565	0.0924	0.2854	0.1665	0.0707	0.2014	0.1779	0.4733	0.0409	0.1427	0.2828	0.1175	0.0747	0.1445	0.1462	0.1797	0.0244	0.0322	0.1094	0.0425	0.0322	0.054	0.3681	0.0789	0.017	0.0929	0.1545	0.1024
CCDC28B	1563	AA	5.1	4	5.2	0	0.9599	0.1798	0.0149	0.9245	1	1	1		1	1	1	1	0.9859	1	1	1	1	1	1	1	0.9684	1	0.9375	1	1	1	1	1	1	1	1	1	1	1	1	1	1	1	1	1	1	1	1
IQCC	1564	AD	1.2	1.1	2	0	0.7853	0.9835	0.213	0.5808	0.5257	0.2443	0.3764	0.6822	0.201	0.3764	0.3257	0.1183	0.2355	0.3225	0.0858			0.2511	0.3492		0.3764	0.3954	0.6729			0.5328	0.668	0.3257	0.1436	0.1329	0.3917		0.1608		0.2565			0.4132		0.5408	0.4721	0.1449
TMEM234	1567	AT	5.9			0	1	0.7103	0.1257	0.3199	0.4245	0.4055	0.1989	0.3378	0.2527	0.324	0.1521	0.2336	0.2356	0.2954	0.2249	0.4854	0.3108	0.5221	0.3152	0.2049	0.2076	0.1947	0.2238	0.4214	0.1943	0.2528	0.2613	0.4876	0.2071	0.1453	0.3742	0.0346	0.1969	0.2767	0.1716	0.3515	0	0.1941	0.0917	0.1347	0.234	0.1734	0.6424
TMEM234	1568	AT	7			0	1	0.7103	0.1257	0.6801	0.5755	0.5945	0.8011	0.6622	0.7473	0.676	0.8479	0.7664	0.7644	0.7046	0.7751	0.5146	0.6892	0.4779	0.6848	0.7951	0.7925	0.8053	0.7762	0.5786	0.8057	0.7472	0.7387	0.5124	0.7929	0.8547	0.6258	0.9654	0.8031	0.7233	0.8284	0.6485	1	0.8059	0.9083	0.8653	0.766	0.8266	0.3576
TMEM234	1569	RI	6.2	6.1	6.3	0	0.9721	0.8047	0.165	0.7969	0.8936	0.7245	0.7459	0.6402	0.6294	0.7275	0.8717	0.2766	0.7569	0.7271	0.3232	0.6691	0.8137	0.8381		0.5928	0.6376	0.7661	0.5493	0.3503	0.7213	0.7639	0.4925	1	0.6735	0.6777	0.595	0.274	0.3929	1	0.6331	0.6402		0.3651	0.335	0.7637	0.8601	0.9119	0.7639
TMEM234	1570	RI	5.7	5.6	5.8	0	0.9983	0.6428	0.1104	0.6187	0.7993	0.7989	0.8341	0.7448	0.9265	0.851	0.8849	0.9115	0.9031	0.7882	0.9335	0.7754	0.9106	1	1	0.9462	0.7554	0.9293	0.8847	0.8576	0.9368	0.8463	0.6837	0.9841	0.93	0.8419	0.8148	1	0.8272	0.9272	0.7043	0.898	0.9616	0.7563	0.9487	0.903	0.9307	0.8033	0.9026
TMEM234	1571	RI	5.5	5.4	5.6	0	1	0.4182	0.0732	0.7762	0.8882	0.8803	0.9108	0.8529	0.9186	0.8252	0.987	0.8639	0.8648	0.8555	0.965	0.9613	0.9648	0.9007	0.8972	0.9415	0.8538	0.9059	0.8229	0.9566	0.8113	0.8391	0.9175	0.9586	0.9652	0.9064	0.8796	0.835	0.7343	0.8208	0.8194	0.8875	0.9541	0.8603	0.9569	0.9231	0.9378	0.9403	0.8286
TMEM234	1573	RI	5.2:5.3	5.1	5.4	0	0.9948	1	0.1162	0.2907	0.3348	0.2096	0.2921	0.2232	0.2281	0.241	0.15	0.0607	0.1491	0.3145	0.111	0.0567	0.1695	0.1082	0.2313	0.2239	0.1754	0.3454	0.1671	0.1664	0.1337	0.1658	0.2581	0.0878	0.1578	0.0635	0.1481	0.159	0.1464	0.1388	0.2392	0.126	0.0549	0.1621	0.1949	0.2205	0.1656	0.2037	0.0897
TMEM234	1574	AA	5.3	5.1	5.4	0	0.9756	0.4531	0.0514	0	0	0.0528	0.0824	0	0.108	0	0	0	0.0314	0.0131	0.0557	0	0.0406	0	0.1061	0	0	0.0812	0.026	0.0976	0	0	0.0542	0	0.03	0	0.0353	0	0	0.0574	0.079	0	0.0846	0	0.0836	0	0	0.0476	0
TMEM234	1575	ES	4	3	5.1	0	0.9965	0.9608	0.1323	0.3402	0.1734	0.4186	0.212	0.3446	0.0983	0.3585	0.3165	0.1663	0.1263	0.4375	0.1622	0.1459	0.1487	0.1851	0.1612	0.2426	0.2983	0.2151	0.1806	0.2379	0.2776	0.3163	0.2962	0.0807	0.1284	0.126	0.1822	0.2282	0.1831	0.1506	0.1922	0.2715	0.0989	0.2216	0.1211	0.308	0.1953	0.2574	0.102
TMEM234	1576	ES	02:03:04	1	5.1	0	0.9546	0.4515	0.0631	0.9559	1	1	1	1	1	1	1	1	0.8338	0.9839	0.9537	1	1	1	1	1	0.8271	1	0.9545	1	1	1	1	1	0.8715	1	0.9124	1	1	1	1	1		1	0.8428	1	1	1	0.8294
TMEM234	1577	ES	02:03:00	1	5.1	0	0.9965	0.1449	0.0148	0.9823	1	1	1	1	1	1	1	1	0.9825	0.9922	0.9937	1	1	1	1	1	0.9529	1	0.9943	1	1	1	1	1	0.9892	1	0.9883	1	1	1	1	1	1	1	0.9838	1	1	1	0.9803
LCK	1579	AP	2			0	0.8761	0.9535	0.1605	0	0	0.5103	0	0	0.0091	0	0	0	0	0.0372	0.1201	0.9535	0	0	0	0	0	0	0.0092	0	0.0215	0.0288	0.0661	0	0	0.4763	0.0164	0	0	0		0.8466	0	0.0372	0.3268	0.2279		0	0
LCK	1581	AP	1			0	0.8761	0.9535	0.1605	1	1	0.4897	1	1	0.9909	1	1	1	1	0.9628	0.8799	0.0465	1	1	1	1	1	1	0.9908	1	0.9785	0.9712	0.9339	1	1	0.5237	0.9836	1	1	1		0.1534	1	0.9628	0.6732	0.7721		1	1
LCK	1582	AA	10.1	9	10.2	0	0.8115	0.5973	0.0704	0.0819	0.0918	0.0187	0.1238	0.1238	0.0075	0.066	0.0582		0	0.0513	0.0396	0.0083	0.0825	0.0733	0.1024	0.0733	0.0443	0.0495	0.1453	0.1708	0.033	0.0353	0	0	0.0288	0	0.0792	0.022	0.0412	0.0288	0			0.132	0	0.0544		0.023	0.043
LCK	1583	ES	8	7	9	0	0.9791	0.4064	0.0467	1	1	0.9871	0.8913	1	0.9888	1	0.9315	1	0.9514	0.992	0.9522	1	1	0.9481	1	0.9792	0.9583	0.9723	0.9497	0.9681	0.9446	1	1	0.9563	0.8328	0.9835	0.9897	0.9409	1	0.9869	0.8613	1	1	0.9711	0.9381	0.9009	0.9163	0.9534	0.9624
LCK	1584	RI	4.2	4.1	4.3	0	0.8185	0.7514	0.114	0.1414	0.0647	0.054	0.1342	0.2187	0.073		0.036	0.1119	0.048	0.1438	0.1007	0.0202	0.1258	0.183	0.0775	0.0547	0.0466		0.1769	0.095	0.0695	0.1438	0.1007	0.0592	0.0853	0.0586	0.1045	0.0715	0.183	0.0801		0.053		0.0839	0.0185	0.0865	0.0876	0.1487	0
HDAC1	1585	AP	1			0	1	0.101	0.0054	1	0.9967	0.997	0.9947	1	1	1	1	1	0.994	1	1	1	1	1	1	1	1	0.9982	0.9921	1	1	0.9973	1	1	0.9959	1	0.9975	1	1	1	1	1	1	1	1	0.996	1	1	0.9939
HDAC1	1586	AP	2			0	1	0.101	0.0054	0	0.0033	0.003	0.0053	0	0	0	0	0	0.006	0	0	0	0	0	0	0	0	0.0018	0.0079	0	0	0.0027	0	0	0.0041	0	0.0025	0	0	0	0	0	0	0	0	0.004	0	0	0.0061
BSDC1	1589	AT	10.2			0	1	0.0103	0.0012	0	0	0	0	0	0	0	0	0	0	0	0	0	0	0	0	0	0	0	0	0	0	0.0068	0	0	0	0	0	0	0	0	0	0	0	0	0	0	0	0	0
BSDC1	1590	AT	11.3			0	1	0.0103	0.0012	1	1	1	1	1	1	1	1	1	1	1	1	1	1	1	1	1	1	1	1	1	1	0.9932	1	1	1	1	1	1	1	1	1	1	1	1	1	1	1	1	1
BSDC1	1591	RI	11.2	11.1	11.3	0	1	0.9543	0.1097	0.1629	0.0761	0.0371	0.079	0.126	0.0412	0.0476	0.0329	0.1686	0.0625	0.1048	0.0523	0.0162	0.1213	0.1056	0.0763	0.0586	0.0519	0.0902	0.1166	0.0551	0.0503	0.0868	0.1205	0.0422	0.0391	0.1102	0.0816	0.0694	0.0492	0.047	0.0415	0.0597	0.0118	0.1427	0.0176	0.0655	0.2056	0.0479	0.0313
BSDC1	1592	ES	10.1	9	11.1	0	1	0.3455	0.0261	0.024	0.0082	0.0138	0.0202	0.0406	0.011	0.0278	0.0214	0.0372	0.0068	0.0396	0.0247	0.0038	0.0252	0.0035	0	0.0165	0.0186	0.0127	0.0212	0.0128	0.0053	0.0034	0.0151	0.0117	0.0196	0.0066	0.0259	0.0054	0.0044	0.0091	0.0125	0.0087	0.0112	0.0292	0.0023	0.0064	0	0.006	0.0221
BSDC1	1593	ES	6.2:7:8.1	6.1	8.2	0	1	0.0319	0.0043	1	0.9919	0.9965	1	0.9897	1	1	1	1	0.9927	0.9985	0.9981	0.993	1	1	1	1	1	0.9974	0.9963	0.9882	0.9951	1	0.9926	0.9938	0.9985	1	0.9978	0.9875	1	1	1	1	0.9925	0.9951	1	1	0.9683	0.9954	0.9884
BSDC1	1594	ES	4.1:4.2:4.3:5	3	6.1	0	0.9948	0.0652	0.0046	1	1	1	1	1	1	1	1	1	1	1	1	1	1	1	1	1	1	1	1	1	1	1	1	1	1	1	1	1	1	1	1	1	1	1	1	1	1	1	1
BSDC1	1595	ES	4.2:4.3:5	3	6.1	0	1	0.0128	0.0009	1	1	1	1	1	1	1	1	1	1	1	1	1	1	1	1	1	1	1	1	1	1	1	1	1	1	1	1	1	1	1	1	1	1	1	1	1	1	1	1
BSDC1	1598	AA	4.1:4.2	3	4.3	0	0.9529	0.4105	0.0804	0.9555	0.8505	0.9166	0.9755	1	0.9694	0.9583	0.9661	1	0.9097	0.8335	0.9605	0.9726	0.9282	1	1	1	0.8984	0.9322	0.8798	1	0.9124	0.8895	0.8279	1	0.9339	1	0.8647	0.9074	0.9467	0.9235	1	0.9165	1	0.6965	0.9507	0.8516	1	0.9784	0.7976
BSDC1	1599	AA	4.2	3	4.3	0	1	0.183	0.0188	0.9881	0.9728	0.9785	0.9917	1	0.9879	0.9875	0.9957	1	0.981	0.9699	0.993	0.9955	0.988	1	1	1	0.9889	0.9898	0.9868	1	0.9842	0.9796	0.9715	1	0.9865	1	0.9784	0.9722	0.986	0.9797	1	0.9804	1	0.9727	0.9899	0.967	1	0.9963	0.962
BSDC1	1600	ES	4.1:4.2:4.3	3	5	0	0.993	0.3457	0.0432	1	0.9775	0.9771	0.9804	1	1	1	0.9731	0.9166	0.9497	0.9737	1	0.9426	1	0.9049	0.9207	1	0.9567	0.8267	0.936	0.9558	1	0.9815	0.9626	0.9636	0.9579	0.9318	0.9613	1	1	1	1	0.9662	0.9466	0.9488	0.9627	1	1	0.9199	0.9647
BSDC1	1601	ES	4.2:4.3	3	5	0	1	0.0577	0.0077	1	0.9965	0.9946	0.9937	1	1	1	0.9967	0.9897	0.9902	0.996	1	0.991	1	0.9908	0.9892	1	0.9957	0.9726	0.9936	0.993	1	0.997	0.9948	0.9916	0.992	0.9914	0.9946	1	1	1	1	0.9927	0.9891	0.9967	0.9928	1	1	0.986	0.9947
BSDC1	1603	AA	4.1	3	4.2	0	0.9983	0.5229	0.0623	0.2152	0.1446	0.2031	0.2595	0.1489	0.2915	0.2316	0.1152	0.1145	0.1723	0.1412	0.1483	0.1439	0.1383	0.0895	0.1214	0.1532	0.0905	0.1331	0.0942	0.1444	0.1485	0.1483	0.1296	0.1958	0.1677	0.1172	0.1286	0.2324	0.2064	0.2074	0.1711	0.1871	0.177	0.0621	0.1744	0.1699	0.2872	0.1528	0.1452
BSDC1	1605	ES	3:4.1:4.2:4.3	2	5	0	0.986	0.1389	0.0115	1	1	1	1	1	1	1	1	1	1	1	1	1	1	1	1	1	1	1	1	1	1	0.9812	1	1	0.9877	1	1	1	1	1	1	1	1	1	1	1	1	1	1
BSDC1	1606	ES	3:4.2:4.3	2	5	0	1	0.0145	0.0015	1	1	1	1	1	1	1	1	1	1	1	1	1	1	1	1	1	1	1	1	1	1	0.9971	1	1	0.9981	1	1	1	1	1	1	1	1	1	1	1	1	1	1
ZBTB8A	1609	AA	5.1	4	5.2	0	0.9913	0.7295	0.1233	0.6396	0.8017	0.8142	0.814	0.6042	0.8066	0.8172	0.7942	0.7745	0.7188	0.7893	0.8035	0.7371	0.6716	0.8548	0.7803	0.7171	0.8165	0.6693	0.7786	0.8208	0.7284	0.6529	0.9613	0.9336	0.7721	0.4953	0.896	0.5744	0.5153	0.6529	0.7355	0.7378	0.5542	0.6801	0.6276	0.8585	0.7825	0.4871	0.7566
ZBTB8OS	1610	AT	8			0	1	0.3914	0.0643	0.2774	0.3074	0.3748	0.2241	0.1765	0.2052	0.3309	0.1344	0.1307	0.2221	0.2294	0.2168	0.1885	0.1953	0.1277	0.3054	0.1854	0.1625	0.1728	0.2598	0.3648	0.412	0.2807	0.3904	0.1778	0.2458	0.2267	0.1752	0.2101	0.1324	0.1885	0.0932	0.2116	0.1779	0.1894	0.1685	0.2539	0.2045	0.2135	0.1603
ZBTB8OS	1611	AT	7			0	1	0.3914	0.0643	0.7226	0.6926	0.6252	0.7759	0.8235	0.7948	0.6691	0.8656	0.8693	0.7779	0.7706	0.7832	0.8115	0.8047	0.8723	0.6946	0.8146	0.8375	0.8272	0.7402	0.6352	0.588	0.7193	0.6096	0.8222	0.7542	0.7733	0.8248	0.7899	0.8676	0.8115	0.9068	0.7884	0.8221	0.8106	0.8315	0.7461	0.7955	0.7865	0.8397
ZBTB8OS	1612	ES	5	4	6	0	1	0.3575	0.0581	0.8536	0.7897	0.7259	0.8188	0.8813	0.7608	0.7324	0.7845	0.8308	0.7523	0.7098	0.8466	0.8416	0.8284	0.9369	0.8223	0.7758	0.7321	0.7804	0.7861	0.7595	0.8458	0.7618	0.7377	0.809	0.8534	0.8331	0.7671	0.8033	0.9069	0.8954	0.8929	0.9242	0.8689	0.7643	0.771	0.7009	0.9107	0.7858	0.8645
RBBP4	1615	AP	1			0	0.9983	0.0487	0.0028	1	1	0.9963	1	1	1	1	1	1	0.9991	1	1	1	1	1	1	0.9925	1	1	1	1	1	1	1	1	1	1	1	1	1	1	1	1	1	1	1	1	1	1	1
RBBP4	1616	AP	2			0	0.9983	0.0487	0.0028	0	0	0.0037	0	0	0	0	0	0	0.0009	0	0	0	0	0	0	0.0075	0	0	0	0	0	0	0	0	0	0	0	0	0	0	0	0	0	0	0	0	0	0	0
RBBP4	1622	AA	14.1	13	14.2	0	1	0.0162	0.0019	0.9966	1	0.9962	0.9975	1	0.9961	1	0.9992	1	0.9988	0.9986	0.999	0.999	0.9974	0.9971	0.9967	1	1	0.9988	0.9981	1	0.9983	0.999	1	1	0.9988	1	0.9978	0.9957	1	0.9928	0.9965	1	1	0.9986	1	0.9926	0.9945	0.9963	0.9985
RBBP4	1623	ES	5	4	6	0	1	0.545	0.075	0.1416	0.0507	0	0.0488	0.0436	0.0171	0.0455	0.0194	0.1234	0.0202	0.0202	0.0732	0.0399	0.152	0.0613	0	0.11	0.0173	0.0346	0.0963	0	0.0549	0.0529	0.0338	0.0422	0.0211	0.0855	0.0416	0.072	0.0739	0.032	0.0348	0.0205	0	0.086	0.0247	0.1405	0	0.0573	0.0668
RBBP4	1625	ES	4	3.2	6	0	1	0.0121	0.0007	1	1	1	1	1	1	1	0.999	1	1	0.9993	1	1	1	1	1	1	1	1	1	1	1	1	1	1	1	1	1	1	0.997	1	1	1	1	1	1	1	1	1	1
RBBP4	1626	ES	04:05:06	3.2	7	0	0.7539	1	0.2321	0.8365	0.5634	0	0.7464	0.466	0.2198	0.6718	0.3704	0.8214	0.3311	0.401	0.613	0.6483	0.7468	0.7993		0.8682	0.2773	0.4714	0.7565	0	0.5465	0.7148	0.694	0.5124	0.3831	0.6833	0.3822	0.6068	0.8228	0.4384	0.5069	0.4054		0.7409	0.3763	0.8594		0.761	0.6316
RBBP4	1627	ES	04:06:00	3.2	7	0	1	0.0472	0.0069	0.9879	0.9854	0.9862	0.9943	0.9809	0.9809	0.9918	0.9891	0.9914	0.9858	0.99	0.9834	0.9924	0.983	0.994	0.9902	0.9935	0.9839	0.9865	0.9882	0.986	0.9838	0.9922	0.9944	0.9866	0.9879	0.9882	0.9762	0.9856	0.9943	0.9858	0.9883	0.9893	0.991	0.9892	0.9862	0.9911	0.9898	0.9935	0.9855
RBBP4	1629	AA	3.1	1	3.2	0	0.9983	0.1124	0.015	0.9747	1	0.983	0.9915	0.9758	0.9688	0.9779	0.9765	0.9906	0.9753	0.979	0.9872	0.9817	1	0.9595	0.9824	0.969	0.9701	0.966	0.9826	0.9871	0.9807	0.9839	0.9785	0.9615	0.9786	0.9854	0.9743	0.9863	0.9854	0.9796	0.9743	0.9825	0.9925	0.9856	0.9793	0.9944	1	0.984	0.9937
KIAA1522	1631	AP	2			0	0.9843	0.9007	0.1504	0.3494	0.5302	0.4271	0.7262	0.5881	0.6	0.5655	0.7343	0.4495	0.2801	0.4508	0.5706	0.3279	0.4353	0.5016	0.0609	0.2723	0.3596	0.608	0.1697	0.8001	0.6378	0.704	0.2051	0.6939	0.5558	0.4655	0.5823	0.4412	0.6385	0.6272	0.4301	0.4408	0.4249	0.3863	0.5077	0.4894	0.6662	0.6389	0.786
KIAA1522	1632	AP	1			0	0.9843	0.9007	0.1463	0.6263	0.46	0.5729	0.2738	0.4055	0.3937	0.4345	0.2657	0.5399	0.7199	0.5492	0.4294	0.6721	0.5538	0.4938	0.9391	0.7277	0.6254	0.392	0.8085	0.1999	0.3622	0.2926	0.7832	0.3061	0.4442	0.5345	0.4146	0.5588	0.3615	0.3533	0.5699	0.5592	0.5751	0.6077	0.4923	0.5106	0.3338	0.3611	0.214
KIAA1522	1633	AP	3			0	0.9843	0.4578	0.04	0.0243	0.0099	0	0	0.0065	0.0063	0	0	0.0106	0	0	0	0	0.011	0.0045	0	0	0.015	0	0.0218	0	0	0.0035	0.0117	0	0	0	0.003	0	0	0.0195	0	0	0	0.006	0	0	0	0	0
KIAA1522	1634	ES	07:08:00	6	9	0	1	0.0634	0.0052	1	0.9971	1	1	1	0.9979	1	0.9988	0.9969	0.998	1	0.9988	0.9984	1	1	1	0.9847	0.991	0.998	1	0.9953	1	0.9935	1	1	1	1	0.9967	1	1	1	1	1	1	1	1	1	1	1	0.9935
S100PBP	1635	AT	9			0	1	0.5251	0.0794	0.526	0.6499	0.6105	0.5429	0.5187	0.635	0.5899	0.53	0.4665	0.6864	0.4961	0.597	0.514	0.5205	0.5221	0.6563	0.6013	0.5817	0.585	0.5598	0.4081	0.6011	0.5001	0.5842	0.6104	0.6449	0.4515	0.564	0.689	0.6069	0.6131	0.6578	0.6185	0.6554	0.5053	0.7376	0.7344	0.5833	0.6253	0.5439
S100PBP	1636	AT	7			0	1	0.5251	0.0794	0.474	0.3501	0.3895	0.4571	0.4813	0.365	0.4101	0.47	0.5335	0.3136	0.5039	0.403	0.486	0.4795	0.4779	0.3437	0.3987	0.4183	0.415	0.4402	0.5919	0.3989	0.4999	0.4158	0.3896	0.3551	0.5485	0.436	0.311	0.3931	0.3869	0.3422	0.3815	0.3446	0.4947	0.2624	0.2656	0.4167	0.3747	0.4561
S100PBP	1637	AA	4.1	3	4.2	0	0.9791	0.7661	0.1143	0.6277	0.7374	0.6704	0.5752	0.6592	0.6405	0.7946	0.6237	0.5542	0.2846	0.5011	0.6592	0.8744	0.6351	0.8186	0.7154	0.7946	0.7851	0.6673	0.7183	0.5772	0.7838	0.6121	0.5865	0.7789	0.6837	0.5752	0.6833	0.7074	0.5116	0.4678	0.5991	0.6445	0.4532	0.7816	0.4053	0.6664		0.6738	0.5371
S100PBP	1638	AD	1.2	1.1	2	0	0.8115	0.7082	0.0856	0.8984	0.8835	0.9238	1	1	1	1	0.9368		0.9785	0.9551	1	1	1	0.7627	0.9468	1	1	0.6899	1	1	1	0.7479	0.9014	0.8683	1		0.8857	0.8654	1	0.8812	1	1	1	1	1	0.9208		0.7311
FNDC5	1641	AT	6.2			0	1	0.7622	0.1314	0.1288	0.1296	0	0.1076	0.2301	0.0463	0	0	0.1113	0.1594	0.2881	0.0694	0.0826	0.0737	0.3432	0.6003	0	0	0.1925	0.1068	0.1992	0.0801	0.036	0	0.0292	0.0823	0	0.1214	0	0.0785	0	0	0	0	0.1313	0	0.4273	0	0	0.038
FNDC5	1642	AT	7			0	1	0.7622	0.1314	0.8712	0.8704	1	0.8924	0.7699	0.9537	1	1	0.8887	0.8406	0.7119	0.9306	0.9174	0.9263	0.6568	0.3997	1	1	0.8075	0.8932	0.8008	0.9199	0.964	1	0.9708	0.9177	1	0.8786	1	0.9215	1	1	1	1	0.8687	1	0.5727	1	1	0.962
TMEM54	1644	ES	00:03:04.100000	2	4.2	0	1	0.036	0.0031	0.9978	0.9974	1	1	1	1	1	0.9965	1	0.9992	0.9985	0.9984	1	0.9978	1	0.9783	1	1	0.9987	1	1	0.9982	1	1	0.9975	0.9982	1	0.9992	1	1	1	0.9959	0.9993	1	0.9994	0.9987	0.9956	0.9934	0.9991	0.9966
RNF19B	1646	AA	9.1	8	9.2	0	1	0.4089	0.0599	0.2403	0.3231	0.2679	0.3667	0.2385	0.3636	0.2312	0.2504	0.3849	0.144	0.2878	0.3293	0.3894	0.3614	0.3038	0.2933	0.2972	0.3236	0.3181	0.3021	0.3287	0.3337	0.2427	0.3102	0.2863	0.2463	0.2865	0.2621	0.4177	0.24	0.2099	0.3573	0.3578	0.4447	0.4052	0.2739	0.3178	0.2983	0.209	0.2013
RNF19B	1647	AA	3.1	2	3.2	0	1	0.392	0.0519	0.1877	0.1886	0.227	0.2647	0.226	0.2093	0.1543	0.1502	0.1991	0.1633	0.1745	0.1922	0.2276	0.1796	0.164	0.2565	0.2482	0.1912	0.1837	0.2256	0.2878	0.1699	0.2197	0.1422	0.1947	0.1679	0.267	0.2263	0.1388	0.1875	0.2438	0.2087	0.1947	0.2015	0.25	0.147	0.2384	0.2789	0.2232	0.2339
AK2	1649	AT	6			0	1	0.2579	0.0232	0.018	0.0094	0.0099	0.0094	0.006	0.0253	0.0277	0.0222	0.005	0.0272	0.0299	0.0203	0.0014	0.005	0.0175	0.0143	0.0306	0.0077	0.0147	0.007	0.0646	0.0117	0.0088	0.0107	0.0071	0.0168	0.0059	0.0152	0.0096	0.006	0.0092	0.0059	0.0101	0.0072	0.013	0.0076	0.0306	0.0131	0.0025	0.0025
AK2	1650	AT	8.2			0	1	0.6258	0.1051	0.5056	0.5446	0.7292	0.6122	0.6185	0.6385	0.5137	0.6332	0.7166	0.7028	0.5385	0.5938	0.664	0.5575	0.6238	0.4757	0.4659	0.6698	0.3913	0.6023	0.6273	0.5419	0.6091	0.534	0.5381	0.6433	0.4788	0.4816	0.5852	0.4784	0.5589	0.7904	0.7948	0.6589	0.5639	0.605	0.6269	0.7637	0.4882	0.4824
AK2	1651	AT	10			0	1	0.5702	0.104	0.4763	0.4459	0.2609	0.3784	0.3756	0.3362	0.4586	0.3446	0.2783	0.27	0.4315	0.3859	0.3346	0.4375	0.3586	0.51	0.5035	0.3225	0.594	0.3907	0.3081	0.4464	0.3822	0.4553	0.4548	0.3399	0.5153	0.5032	0.4051	0.5156	0.4319	0.2036	0.1952	0.3339	0.4231	0.3874	0.3425	0.2233	0.5092	0.5151
AK2	1652	ES	9	8.1	10	0	1	0.4468	0.0573	0.0679	0.0558	0.0925	0.1318	0.1472	0.0576	0.0236	0.0768	0.1926	0.1488	0.0848	0.0902	0.1079	0.1764	0.2297	0.0508	0.0304	0.0859	0.0795	0.1032	0.0763	0.0598	0.0817	0.1018	0.056	0.1365	0.1168	0.058	0.0333	0.0372	0.0278	0.0589	0.0653	0.0213	0.079	0.0519	0.0343	0.0406	0.2624	0.0301
AK2	1653	ES	5	4	7	0	1	0.094	0.0155	0.9898	0.981	0.9921	0.9853	0.9866	0.9843	0.963	0.9949	0.9753	0.9954	0.9913	0.9713	0.9868	0.9863	0.9811	0.9789	0.9677	0.9325	0.9821	0.9475	0.9817	0.9869	0.9804	0.9892	0.965	0.9121	0.9862	0.993	0.9767	0.9796	0.9651	0.9919	0.9756	0.9873	0.9891	0.9792	0.9883	0.9686	0.9815	0.9835
AK2	1654	ES	02:03:00	1	4	0	1	0.8686	0.0665	0.9121	0.8317	0.8517	0.9178	1	0.9261	0.8265	0.9386	0.9345	0.9478	0.8855	0.9893	0.9174	1	0.9752	0.8682	0.9086	0.911	0.9585	0.9516	0.9591	0.8224	0.8895	0.937	0.9431	0.8616	0.9044	0.9244	0.9535	0.9573	0.9168	0.9355	0.9275	1	0.936	0.8863	0.9437	0.981	0.9766	0.9848
AK2	1655	ES	3	1	4	0	0.9983	0.2999	0.0133	0.9968	0.9897	0.9918	0.9926	1	0.9933	0.9927	0.9953	0.9968	0.994	0.9945	0.9986	0.9929	1	0.9975	0.997	0.9948	0.9935	0.9965	0.9963	0.9973	0.9908	0.9952	0.9955	0.9948	0.9838	0.9923	0.9966	0.9963	0.9962	0.9953	0.9957	0.9965	1	0.9965	0.9888	0.9945	0.9984	0.9977	0.9979
AK2	1656	ES	2	1	3	0	1	0.831	0.0583	0.0388	0.0587	0.0554	0.0922	0.0823	0.0946	0.0405	0.0814	0.0524	0.1201	0.0508	0.1402	0.0902	0.1003	0.1093	0.0227	0.0603	0.0789	0.0922	0.0837	0.0753	0.0494	0.0457	0.0766	0.0981	0.1141	0.0818	0.0494	0.0849	0.0946	0.0583	0.0692	0.0507	0.0401	0.0622	0.0974	0.1017	0.091	0.1068	0.1421
ADC	1659	AT	13			0	0.9983	0.9806	0.1056	0.8346	0.874	0.9043	0.8482	0.9212	0.8187	0.8116	1	1	0.9206	0.8609	0.8039	0.9138	0.8055	0.8691	1	0.976	0.9626	0.984	0.8005	0.7711	0.9359	0.9139	0.8807	0.9243	0.8603	1	0.7836	0.877	0.8553	0.9361	0.7841	0.7543	0.8879	0.8179	1	0.8515	0.8814	0.9662	1
ADC	1660	AT	11			0	0.9983	0.9806	0.1056	0.1654	0.126	0.0957	0.1518	0.0788	0.1813	0.1884	0	0	0.0794	0.1391	0.1961	0.0862	0.1945	0.1309	0	0.024	0.0374	0.016	0.1995	0.2289	0.0641	0.0861	0.1193	0.0757	0.1397	0	0.2164	0.123	0.1447	0.0639	0.2159	0.2457	0.1121	0.1821	0	0.1485	0.1186	0.0338	0
ADC	1662	ES	06:07:08	5	9	0	1	0.0785	0.0076	1	1	1	1	1	1	1	1	1	0.9768	1	1	1	1	1	1	1	1	0.993	1	1	1	1	1	1	1	1	1	1	1	1	1	1	1	1	1	1	1	1	1
TRIM62	1665	AP	1			0	0.9634	0.9408	0.0893	0.9454	1	1	1	1	0.9577	1	1	1	0.941	1	1	1	1	1	1	1	1	1	1	0.9488	1	1	1	1	1	1	0.8794	1	0.8842	1	1	1	1	1	1	1		1	1
TRIM62	1666	AP	2			0	0.9634	0.9408	0.0893	0.0546	0	0	0	0	0.0423	0	0	0	0.059	0	0	0	0	0	0	0	0	0	0	0.0512	0	0	0	0	0	0	0.1206	0	0.1158	0	0	0	0	0	0	0		0	0
PHC2	1670	AP	10			0	0.9878	0.6646	0.0891	0.759	0.866	0.8542	0.953	0.8935	0.955	0.9647	0.9762	0.9313	0.9878	0.9097	0.9154	0.9456	0.9182	0.8361	0.8598	0.9257	0.9829	0.9626	0.9166	0.8865	0.9521	0.8656	0.9473	0.965	0.9167	1	0.9554	0.9694	0.8119	0.9261	1	0.968	0.9047	0.9743	0.9603	0.7247	1	0.8858	0.9256
PHC2	1671	AP	1			0	0.9878	0.6646	0.0891	0.241	0.134	0.1458	0.047	0.1065	0.045	0.0353	0.0238	0.0687	0.0122	0.0903	0.0846	0.0544	0.0818	0.1639	0.1402	0.0743	0.0171	0.0374	0.0834	0.1135	0.0479	0.1344	0.0527	0.035	0.0833	0	0.0446	0.0306	0.1881	0.0739	0	0.032	0.0953	0.0257	0.0397	0.2753	0	0.1142	0.0744
PHC2	1674	AT	16			0	1	0.3151	0.024	0.0327	0.0129	0.0066	0.0137	0.0224	0.011	0.0101	0.0078	0.0214	0.0137	0.0181	0.0081	0.0029	0.0315	0.0122	0.0127	0.0107	0.0136	0.0039	0.0148	0.0127	0.0055	0.012	0.0084	0.0039	0.015	0.0144	0.0126	0	0.0067	0.0066	0.0197	0.0018	0.0031	0.0157	0.0037	0.0076	0.0043	0.0068	0.0058
PHC2	1675	AT	17			0	1	0.3151	0.024	0.9673	0.9871	0.9934	0.9863	0.9776	0.989	0.9899	0.9922	0.9786	0.9863	0.9819	0.9919	0.9971	0.9685	0.9878	0.9873	0.9893	0.9864	0.9961	0.9852	0.9873	0.9945	0.988	0.9916	0.9961	0.985	0.9856	0.9874	1	0.9933	0.9934	0.9803	0.9982	0.9969	0.9843	0.9963	0.9924	0.9957	0.9932	0.9942
ZSCAN20	1678	AT	6.2			0	1	0.6527	0.1169	0.3559	0.25	0.1169	0.3028	0.4152	0.2319	0.2039	0.1826	0.2472	0.2789	0.3476	0.1487	0.2887	0.479	0.334	0.258	0.319	0.3432	0.3428	0.3647	0.3231	0.3344	0.281	0.2578	0.2178	0.1574	0.2621	0.4033	0.279	0.3371	0.4395	0.3091	0.2711	0.3465	0.3935	0.3161	0.2697	0.4298	0.4243	0.4701
ZSCAN20	1679	AT	8			0	1	0.6527	0.1169	0.6441	0.75	0.8831	0.6972	0.5848	0.7681	0.7961	0.8174	0.7528	0.7211	0.6524	0.8513	0.7113	0.521	0.666	0.742	0.681	0.6568	0.6572	0.6353	0.6769	0.6656	0.719	0.7422	0.7822	0.8426	0.7379	0.5967	0.721	0.6629	0.5605	0.6909	0.7289	0.6535	0.6065	0.6839	0.7303	0.5702	0.5757	0.5299
CSMD2	1687	AT	50			0	1	0.8237	0.1802	0.3794	0.6643	0.5347	0.3828	0.7886	0.4679	0.2226	0.6894	0.7277	0.5007	0.4731	0.5086	0.6977	0.6333	0.6346	0.9875	0.4643	0.6682	0.6398	0.837	0.5258	0.8305	0.5646	0.6675	0.1763	0.4558	0.5312	0.6709	0.695	0.8454	0.8839	0.6124	0.4859	0.6088	0.9178	0.6276	0.4369	0.3889	0.7324	0.7918
CSMD2	1688	AT	51			0	1	0.3348	0.0678	0.0953	0.0508	0.0533	0.1155	0	0.0571	0.1369	0.2034	0	0.02	0.1813	0.0869	0.0213	0.0756	0.0349	0	0.1912	0.0445	0.0598	0	0	0	0.0564	0.1316	0.1654	0.0533	0	0.0193	0.2262	0	0	0.1755	0	0.1454	0.0416	0	0.0871	0.1314	0.0248	0.074
CSMD2	1689	AT	78			0	1	0.6718	0.1218	0.2386	0.2605	0.3353	0.4913	0.2114	0.3106	0.3165	0.1072	0.0531	0.1339	0.2452	0.3151	0.2197	0.2911	0.3306	0.0125	0.2756	0.2233	0.3003	0.114	0.1564	0.0275	0.2438	0.1468	0.2416	0.2763	0.4688	0.2821	0.0789	0.0432	0.1161	0.2121	0.4526	0.1622	0.0406	0.1924	0.3507	0.385	0.2072	0.1342
CSMD2	1690	AT	17.2			0	1	0.4167	0.075	0.2866	0.0244	0.0767	0.0104	0	0.1644	0.3239	0	0.2192	0.3454	0.1004	0.0894	0.0613	0	0	0	0.0688	0.064	0	0.049	0.3179	0.142	0.1353	0.0541	0.4167	0.2147	0	0.0277	0	0.1114	0	0	0.0615	0.0837	0	0.18	0.1253	0.0946	0.0356	0
SMIM12	1697	AP	1.1			0	0.9983	1	0.0682	0.9655	0.9671	0.9761	0.9475	0.9448	0.9855	0.9862	0.9847	0.9675	0.9792	0.9793	0.9805	0.9819	0.9425	0.9609	0.9516	0.968	0.9751	0.9862	0.9654	0.972	1	0.98	0.9433	0.99	0.966	0.9822	0.9796	0.9964	0.9954	0.9481	0.9797	0.9759	0.9812	0.9901	0.9778	0.9731	0.9526	0.9662	0.9818
SMIM12	1698	AP	2.1			0	0.9983	1	0.0682	0.0345	0.0329	0.0239	0.0525	0.0552	0.0145	0.0138	0.0153	0.0325	0.0208	0.0207	0.0195	0.0181	0.0575	0.0391	0.0484	0.032	0.0249	0.0138	0.0346	0.028	0	0.02	0.0567	0.01	0.034	0.0178	0.0204	0.0036	0.0046	0.0519	0.0203	0.0241	0.0188	0.0099	0.0222	0.0269	0.0474	0.0338	0.0182
SMIM12	1699	AT	7			0	1	0.1898	0.0232	0.0469	0.0285	0.0131	0.0386	0.06	0.0185	0.0293	0.0228	0.051	0.0205	0.0329	0.0267	0.0186	0.0443	0.0499	0.0358	0.0228	0.0181	0.0194	0.0425	0.0352	0.0223	0.0309	0.0388	0.0158	0.0253	0.0308	0.0316	0.0125	0.0152	0.0168	0.007	0.01	0.0165	0.0293	0.0068	0.0128	0.0117	0.0152	0.0226
SMIM12	1700	AT	4.2			0	1	0.1898	0.0232	0.9531	0.9714	0.9869	0.9614	0.94	0.9815	0.9707	0.9772	0.949	0.9795	0.9671	0.9733	0.9814	0.9557	0.9501	0.9642	0.9772	0.9819	0.9806	0.9575	0.9648	0.9777	0.9691	0.9612	0.9842	0.9747	0.9692	0.9684	0.9875	0.9848	0.9832	0.993	0.99	0.9835	0.9707	0.9932	0.9872	0.9883	0.9848	0.9774
SMIM12	1701	AD	1.3	1.2	4.1	0	0.9668	0.4354	0.0947	1	1	0.9319	0.9518	1	1	0.9026	0.898	1	0.938	0.8386	0.9488	0.9026	1		1	0.6617	0.9355	0.8845	0.8853	1	0.8006	1	0.7942	0.9633	0.9386	0.7671	0.9714	0.7118	1	1	0.9453	0.8451	0.8544	0.8606	0.961	0.928	1	0.909	0.851
SMIM12	1702	AD	1.2:1.3	1.1	4.1	0	0.9948	0.9845	0.0628	0.0822	0.096	0.0948	0.1052	0.1277	0.0827	0.1535	0.0703	0.1742	0.1021	0.1163	0.0986	0.1418	0.0778	0.0689	0.1472	0.1243	0.1165	0.1307	0.1015	0.104	0.083	0.145	0.1396	0.1292	0.1358	0.1619	0.1371	0.0674	0.0984	0.1034	0.1091	0.086	0.115	0.0642	0.1595	0.1124	0.078	0.0904	0.1126
SMIM12	1703	AD	1.2	1.1	4.1	0	0.9878	0.126	0.018	0	0	0.0083	0.0064	0.012	0	0.0348	0.0101	0	0.009	0.0259	0.0053	0.0183	0	0.0328	0	0.0722	0.0086	0.0211	0.0167	0	0.0228	0	0.0381	0.0069	0.0109	0.0551	0.0059	0.0375	0	0	0.0068	0.0198	0.0237	0.0107	0.0074	0.0112	0.0074	0.0094	0.0296
ZMYM6	1708	AP	1			0	0.9215	1	0.137	0.6788	0.5114	0.5633	0.5032	0.5781	0.5549	0.6102	0.4233	0.246	0.5616	0.4571	0.3948	0.3995	0.4391	0.4606	0.5757	0.3429	0.3758	0.5348	0.4295	0.5151	0.4271	0.5229	0.4701	0.4302	0.488	0.3348	0.5401	0.5044	0.4541	0.6102	0.2654	0.1437	0.3196	0.6027	0.5986	0.6297		0.5516	0.6415
ZMYM6	1709	AP	2			0	0.9215	1	0.137	0.3212	0.4886	0.4367	0.4968	0.422	0.4451	0.3898	0.5767	0.754	0.4384	0.5429	0.6052	0.6005	0.5609	0.5394	0.4243	0.6571	0.6242	0.4652	0.5705	0.4849	0.5729	0.4771	0.5299	0.5698	0.512	0.6652	0.4599	0.4956	0.5459	0.3898	0.7346	0.8563	0.6804	0.3973	0.4014	0.3703		0.4484	0.3585
ZMYM6	1710	AT	18			0	1	0.3796	0.0516	0.2948	0.2879	0.2354	0.3647	0.372	0.2928	0.2849	0.2372	0.2702	0.3638	0.3077	0.3072	0.278	0.2899	0.2407	0.2241	0.2234	0.2991	0.2254	0.3513	0.2612	0.2682	0.3301	0.3122	0.3088	0.2861	0.3096	0.3595	0.2939	0.2744	0.252	0.2845	0.2804	0.2553	0.3116	0.2891	0.3017	0.3327	0.2987	0.3148
ZMYM6	1711	AT	6.2			0	1	0.2615	0.0393	0.1379	0.141	0.1761	0.1014	0.0864	0.1829	0.1591	0.1669	0.1546	0.1033	0.1411	0.1324	0.1194	0.0988	0.1768	0.1885	0.1812	0.132	0.2588	0.0752	0.147	0.1579	0.0947	0.0867	0.1325	0.1414	0.1104	0.1012	0.1208	0.1557	0.1751	0.1277	0.102	0.1392	0.1335	0.1409	0.1386	0.076	0.1726	0.1712
ZMYM6	1712	AT	20			0	1	0.4201	0.0471	0.5674	0.5711	0.5885	0.5339	0.5416	0.5244	0.556	0.5959	0.5752	0.5328	0.5511	0.5604	0.6026	0.6113	0.5825	0.5873	0.5954	0.5689	0.5158	0.5734	0.5918	0.5739	0.5752	0.6011	0.5587	0.5724	0.5799	0.5393	0.5853	0.5698	0.5729	0.5878	0.6175	0.6055	0.5549	0.5699	0.5598	0.5913	0.5287	0.514
ZMYM4	1716	ES	10:11:00	9	12	0	0.993	0.0443	0.0033	1	1	1	1	1	1	1	1	1	1	1	1	1	1	1	1	1	1	1	1	1	1	1	1	1	1	1	1	1	1	1	1	1	1	1	1	1	1	1	1
KIAA0319L	1717	AP	12			0	0.9965	0.899	0.0685	0.0235	0	0	0.0431	0	0.0233	0	0.0108	0.0077	0	0.0243	0.0066	0.0167	0	0.0081	0	0	0.0244	0.0055	0.0126	0.0092	0	0.0092	0	0.0079	0	0.021	0.0238	0	0	0	0	0	0	0.0123	0	0.0228	0	0.0092	0.0113
KIAA0319L	1718	AP	2.1			0	0.9965	0.922	0.0858	0.8385	0.9348	0.9105	0.891	0.8707	0.8665	0.8706	0.8531	0.8768	0.8166	0.8547	0.909	0.8724	0.8596	0.9211	0.9	0.8437	0.8391	0.8949	0.8606	0.8882	0.8133	0.8416	0.8631	0.8496	0.8917	0.877	0.8522	0.8029	0.9642	0.9093	0.8913	0.8699	0.889	0.8444	0.8667	0.8436	0.7937	0.8079	0.8848
KIAA0319L	1719	AP	1			0	0.9965	0.4425	0.0582	0.138	0.0652	0.0895	0.0659	0.1293	0.1102	0.1294	0.1361	0.1155	0.1834	0.121	0.0845	0.1109	0.1404	0.0708	0.1	0.1563	0.1365	0.0995	0.1268	0.1026	0.1867	0.1492	0.1369	0.1425	0.1083	0.102	0.1241	0.1971	0.0358	0.0907	0.1087	0.1301	0.111	0.1433	0.1333	0.1337	0.2063	0.183	0.1039
KIAA0319L	1723	AA	10.1	9	10.2	0	0.9843	0.0801	0.0095	1	0.9962	0.9861	1	1	1	1	0.9923	0.9592	1	0.9914	1	1	0.9787	1	1	0.9652	1	1	0.9909	1	1	1	1	1	1	1	1	1	0.9837	1	1	1	1	1	0.9718	1		1	1
KIAA0319L	1724	ES	7	6	8	0	0.9983	0.0555	0.0065	1	0.997	1	0.9948	1	1	0.9875	1	0.9905	1	1	0.9982	0.9969	1	1	1	0.9808	1	0.9876	1	1	1	0.9964	1	0.9941	1	0.993	1	1	1	1	1	1	1	0.9942	1	1	1	0.9935	0.9923
KIAA0319L	1725	ES	4	3	5	0	1	0.2444	0.0244	0.9684	0.9865	0.9715	0.9778	0.9523	0.9705	0.92	0.9961	0.9695	0.9838	0.9749	0.987	0.9795	1	0.9794	0.9868	0.956	1	0.9918	0.9564	0.98	1	0.963	1	1	0.9726	0.9838	0.995	0.8999	0.9541	0.963	1	1	1	0.9846	1	0.9789	1	0.9915	0.9117
KIAA0319L	1726	AD	2.2	2.1	3	0	0.9093	0.3726	0.0258	0	0.0146	0.0255	0.0576	0	0.025	0.0248	0.0167	0	0.0205	0	0	0.0148	0	0.0179	0	0	0	0	0.0092	0	0.0277	0.0299	0.0221	0.0211	0.0139	0	0		0.0277	0	0.0175	0.0314	0	0.0132	0.0576	0		0.0129	0.0156
NCDN	1727	AD	1.2:1.3	1.1	2	0	0.9913	0.2185	0.0114	1	1	1	1	1	0.9538	1	1	1	1	1	1	1	1	1	1	1	1	1	1	1	1	0.9839	1	1	1	1	0.9714	1	1	1		1	1	1	1	1	1	1	1
NCDN	1728	ES	1.3	1.1	2	0	0.8935	0.1558	0.0106	1	1	1	1	1	0.9748	1	1	1	1	1	1	1	1	1	1	1	1	1	1	1	1	0.983	1	1	1	1	0.9783	1	1	1	1	1	1	1	1	1		1	1
NCDN	1729	RI	1.2	1.1	1.3	0	0.9843	0.8036	0.1365	0.5741	0.437	0.4726	0.4133	0.5946	0.4307	0.5549	0.4691	0.4795	0.8004	0.4675	0.5646	0.5088	0.7002	0.5408	0.837	0.3548	0.6805	0.6337	0.492	0.7177	0.384	0.5971	0.4611	0.5614	0.5175	0.6311	0.4988	0.4389	0.375	0.255		0.4363	0.5946	0.8049	0.4313	0.5889	0.6311	0.6758	0.5455
CLSPN	1730	AT	25			0	1	0.8402	0.1877	0.3948	0.4284	0.7166	0.4317	0.2699	0.5035	0.6272	0.4455	0.2534	0.7167	0.5009	0.6306	0.3167	0.3236	0.61	0.7602	0.5372	0.5478	0.6366	0.4899	0.5749	0.6952	0.5194	0.6079	0.5472	0.5995	0.4768	0.5542	0.1795	0.1591	0.613	0.5746	0.6212	0.7032	0.1283	0.5661	0.3887	0.3808	0.6705	0
CLSPN	1731	AT	26			0	1	0.8402	0.1877	0.6052	0.5716	0.2834	0.5683	0.7301	0.4965	0.3728	0.5545	0.7466	0.2833	0.4991	0.3694	0.6833	0.6764	0.39	0.2398	0.4628	0.4522	0.3634	0.5101	0.4251	0.3048	0.4806	0.3921	0.4528	0.4005	0.5232	0.4458	0.8205	0.8409	0.387	0.4254	0.3788	0.2968	0.8717	0.4339	0.6113	0.6192	0.3295	1
AGO1	1734	AP	1			0	0.8028	0.9338	0.1158	0	0	0	0.3863	0.1184	0	0	0	0.1059	0	0	0.0438	0	0	0	0	0	0	0	0	0	0	0	0	0	0	0	0				0	0	0	0		0		0	0
AGO1	1735	AP	2			0	0.8028	0.9338	0.1158	1	1	1	0.6137	0.8816	1	1	1	0.8941	1	1	0.9562	1	1	1	1	1	1	1	1	1	1	1	1	1	1	1	1				1	1	1	1		1		1	1
AGO3	1739	AT	7.2			0	1	0.4048	0.0639	0.1555	0.1014	0.0658	0.1318	0.144	0.0377	0.1067	0.0537	0.0096	0.1086	0.1325	0.0963	0.1306	0.1362	0.0604	0.0299	0.1208	0.0969	0.098	0.1449	0.0707	0.0606	0.0483	0.1078	0.1695	0.1358	0.0408	0.0786	0.1303	0.104	0.0665	0.1311	0.097	0.0698	0.1159	0.0876	0.148	0.1326	0.0795	0.1684
AGO3	1740	AT	8			0	1	0.6582	0.1091	0.3189	0.3606	0.5758	0.1957	0.0889	0.4613	0.3841	0.4261	0.1607	0.433	0.4021	0.1378	0.1898	0.3628	0.29	0.1463	0.1775	0.4665	0.3453	0.16	0.1909	0.5092	0.0902	0.132	0.2768	0.22	0.1429	0.2438	0.4864	0.2619	0.2792	0	0.3565	0.0977	0.1548	0.5503	0.4756	0.5287	0.5878	0.2209
AGO3	1741	AT	22			0	1	0.6744	0.1208	0.5256	0.538	0.3584	0.6725	0.7671	0.5011	0.5092	0.5202	0.8298	0.4584	0.4655	0.766	0.6797	0.501	0.6496	0.8238	0.7016	0.4366	0.5567	0.6951	0.7383	0.4302	0.8615	0.7602	0.5537	0.6442	0.8163	0.6776	0.3833	0.6342	0.6543	0.8689	0.5465	0.8324	0.7292	0.362	0.3764	0.3387	0.3327	0.6107
AGO3	1742	ES	6	5	9	0	0.8674	0.2292	0.0214	1	1	1	1	1	1	1	1		1	1	1	1		1	1	1	1	1	1	1	1	1	1	1	1	0.8341	1	1		1	1	1	1	1	1	1	1	1	1
AGO3	1743	ES	4	3	5	0	0.9389	0.3016	0.0324	0.8736	1	1	1	1	1	1	1	1	1	1	1	1	1	1	1	1	1	0.9756	0.8742	1	1	1	0.9477	1	0.9563	1	1		1	1		1		1	1	1	0.8633	1	1
COL8A2	1749	AD	3.2	3.1	4	0	0.8604	0.4982	0.0457	0.9119	0.9114	1	0.993	1	1	1	1	1	0.9563	1	1	1	0.9732	1		1	1	1	0.9189	1	1	1	1	0.9655	0.9777	1	1	0.85	1	1	1	1	1	1	0.7674	1		1	0.9734
TRAPPC3	1752	ES	4	3	5	0	1	0.4884	0.0427	0.0372	0.0218	0.0063	0.0292	0.0245	0.0103	0.0125	0.007	0.0036	0.0106	0.0374	0.0147	0.0032	0.0261	0.0554	0.0087	0.0125	0.0105	0.0171	0.0364	0.0146	0.0066	0.0175	0.013	0.0049	0.0088	0.0034	0.0251	0.0061	0.0057	0.0043	0.0065	0.0078	0.0046	0.0115	0	0.0098	0.018	0.0163	0.0081
TRAPPC3	1753	AD	1.3	1.2	2	0	0.986	0.2936	0.0355	1	1	1	0.9825	1	1	1	0.9817	1	0.967	0.8852	1	0.9655	1	1	1	1	1	0.9491	1	1	1	0.9803	1	0.9652	0.9602	1	0.952	1	0.9417	1	1	1	1	0.9381	0.9833	1	1	0.9624	0.9434
TRAPPC3	1754	AD	1.2:1.3	1.1	2	0	1	0.5068	0.0537	0.2321	0.1438	0.1149	0.1171	0.1063	0.1043	0.144	0.1252	0.0655	0.1832	0.1249	0.092	0.0965	0.1864	0.1022	0.1383	0.0977	0.2244	0.2182	0.1229	0.1534	0.1224	0.2046	0.1457	0.1732	0.1678	0.2424	0.1977	0.0746	0.1118	0.2055	0.1023	0.1572	0.1124	0.0955	0.1788	0.199	0.2445	0.1479	0.122
TRAPPC3	1755	AD	1.2	1.1	2	0	1	0.0625	0.0081	0	0	0	0.0031	0	0	0	0.0035	0	0.0087	0.0222	0	0.0061	0	0	0	0	0	0.0209	0	0	0	0.0072	0	0.0088	0.0114	0	0.0172	0	0.0077	0	0	0	0	0.0082	0.0041	0	0	0.0089	0.0107
MAP7D1	1756	AP	9			0	0.9843	0.9792	0.1419	0.3201	0.1998	0.0912	0.1842	0.2505	0.0389	0.0802	0.1068	0.2546	0.1972	0.1474	0.2615	0.0962	0.0632	0	0.1173	0.1533	0	0.1265	0.1971	0.0849	0.1209	0.1512	0.1869	0.0794	0.0776	0.0399	0.3696	0.1222	0.2824	0.1929	0.1944	0.0914	0.2114	0.3028	0.0468	0.0272	0	0.1163	0.0336
MAP7D1	1757	AP	1			0	0.9843	0.9792	0.1419	0.6799	0.8002	0.9088	0.8158	0.7495	0.9611	0.9198	0.8932	0.7454	0.8028	0.8526	0.7385	0.9038	0.9368	1	0.8827	0.8467	1	0.8735	0.8029	0.9151	0.8791	0.8488	0.8131	0.9206	0.9224	0.9601	0.6304	0.8778	0.7176	0.8071	0.8056	0.9086	0.7886	0.6972	0.9532	0.9728	1	0.8837	0.9664
MAP7D1	1758	AA	15.1	14	15.2	0	1	0.2165	0.0262	0.0994	0.0993	0.0808	0.0628	0.0808	0.056	0.0739	0.0651	0.0665	0.0446	0.0814	0.0706	0.0863	0.0798	0.0583	0.0623	0.0692	0.0597	0.0736	0.0733	0.097	0.0714	0.0823	0.0423	0.0848	0.115	0.1044	0.0871	0.0621	0.1295	0.1207	0.0924	0.0843	0.0765	0.1419	0.0719	0.0924	0	0.0806	0.0794
MAP7D1	1759	AA	11.1	10	11.2	0	0.9808	0.225	0.0342	0.9214	0.9342	0.9393	0.9384	0.913	0.8958	0.9745	0.9602	0.934	0.9366	0.9476	0.8947	0.9356	0.934	1	0.9516	0.9427	0.9286	0.9283	0.9186	0.9323	0.9222	0.9468	0.8961	0.8602	0.8974	0.9431	0.9183	0.9286	0.8617	0.9005	1	0.8528	0.8777	0.9314	0.9517	0.9667	1	0.8568	0.9255
MAP7D1	1760	RI	7.2	7.1	7.3	0	0.9668	0.8394	0.1278	0.4946	0.6185	0.6709	0.5513	0.9327	0.6179	0.6437	0.5416	0.5705	0.5192	0.6435	0.8049	0.6432	0.5543	0.3235	0.4626	0.4889	0.6162	0.5893	0.7009	0.5543	0.5543	0.649	0.5893	0.7872	0.7032	0.5725	0.7437	0.7051	1	0.3009	0.401	0.5344	0.7051	0.7928	0.7459	0.6254	0.7051	0.8291	0.617
MAP7D1	1761	ES	6	5	7.1	0	1	0.6506	0.0725	0.7379	0.7494	0.8017	0.7731	0.801	0.7325	0.8357	0.7088	0.7075	0.772	0.7241	0.7828	0.7786	0.7062	0.7311	0.7159	0.8185	0.7386	0.659	0.6185	0.8142	0.6451	0.7146	0.5813	0.7685	0.6969	0.7075	0.789	0.724	0.718	0.7488	0.6818	0.6901	0.8848	0.6486	0.7476	0.6465	0.7327	0.6962	0.7876
THRAP3	1762	ES	2	1	3	0	0.9476	1	0.0797	0.0535	0.053	0.053	0.0784	0.0268	0.1014	0.1	0.1219	0.0698	0.0355	0.0598	0.1036	0.0541	0.1237	0.0777	0.0706	0.0141	0.11	0.0562	0.0317	0.0328	0.0294	0.0437	0.0139	0.093	0.1176	0.0146	0.0823			0.0157	0.0625	0.026	0.0385	0.0571	0.0156	0.035		0.022	0.0361
SH3D21	1765	AT	16.2			0	0.9825	0.8736	0.1787	0.1994	0.4065	0.2225	0.3178	0.3462	0.2317	0.7308	0.3387	0.1955	0.3333	0.3597	0.1547	0.2317	0.2657	0.3519	0.0856	0.3851	0.5108	0.6266	0.319	0.3762	0.3239	0.1985	0.1265	0.6378	0.4488	0.322	0.1609		0.6934	0.5124	0.3945	0.1438	0.3056	0.4792		0.5122	0	0.3519	0.6333
SH3D21	1766	AT	19			0	0.9825	0.8736	0.1787	0.8006	0.5935	0.7775	0.6822	0.6538	0.7683	0.2692	0.6613	0.8045	0.6667	0.6403	0.8453	0.7683	0.7343	0.6481	0.9144	0.6149	0.4892	0.3734	0.681	0.6238	0.6761	0.8015	0.8735	0.3622	0.5512	0.678	0.8391		0.3066	0.4876	0.6055	0.8562	0.6944	0.5208		0.4878	1	0.6481	0.3667
SH3D21	1767	ES	12:13:00	11	14	0	0.9703	0.3089	0.0512	1	0.9614	0.9314	1	1	1	1	0.951	0.9204	1	0.9724	1	1	1	1	0.8868	1	1	0.9481	0.954	1	0.9491	0.9727	0.9507	0.94	0.8855	1	1	1	1	1	1	1	1	1	1	1	1	1	0.7718
SH3D21	1768	ES	07:08:00	6	9	0	0.9442	0.4399	0.0648	0.9145	1	1	0.9534	1	1	1	1	1	0.6327	0.9487	0.9031	0.9483	0.933	0.9272	1	1	0.9537	0.9364	0.9241	1	1	0.9823	1	0.8595	0.9022	1	0.9712	1	1	1	1	1	1	0.9622	0.8899	0.9658	1	1	1
SH3D21	1769	ES	5	4.2	6	0	0.8988	0.2027	0.0324	1	1	0.9005	1	1	1	1	1	1	0.8551	0.9813	1	1	1	1	1		1	1	0.9485	1	0.9248	0.9737	1	1	0.831	1	0.9844		1	1	1	1	1	1	1	0.966		0.9323	1
STK40	1772	RI	11.2	11.1	11.3	0	0.9983	1	0.0575	0.0867	0.0378	0.0301	0.0538	0.0553	0.009	0.0152	0.0119	0.0353	0.0515	0.0402	0.0178	0.0146	0.0348	0.0441	0.0273	0.0133	0.0124	0.0155	0.0748	0.0234	0.012	0.0242	0.0205	0.0153	0.0267	0.0289	0.032	0.0215	0.0078	0.0115	0.0142	0.0111	0.0044	0.0522	0.0033	0.0038	0.0365	0.0199	0.0129
STK40	1773	AA	4.1	3	4.2	0	0.9843	0.379	0.0304	0.0587	0.0564	0.036	0.0313	0.0195	0.0264	0.0497	0	0	0.006	0.0121	0.0425	0.037	0.0134	0	0.0148	0	0.0476	0.0184	0.0149	0.0249	0	0.015	0.0065	0.0188	0	0.0114	0.0391	0	0	0.0492	0.0721	0.0575	0	0.0126	0.0644	0.0074	0	0	0.0097
STK40	1774	ES	2	1	3	0	0.9948	0.8099	0.1276	0.5317	0.3723	0.475	0.574	0.5342	0.4918	0.4891	0.5394	0.2452	0.4371	0.5153	0.543	0.4511	0.3593	0.4482	0.5051	0.601	0.4778	0.5467	0.3336	0.4925	0.5093	0.3967	0.5222	0.4186	0.4344	0.3643	0.4468	0.5983	0.3697	0.4058	0.5462	0.4171	0.3384	0.6209	0.4001	0.5807	0.535	0.6061	0.366
OSCP1	1775	AP	1			0	0.993	0.5751	0.0311	0.9932	0.9845	1	0.9825	1	1	0.9776	1	1	1	1	1	1	1	0.9855	1	1	1	1	1	1	1	1	1	1	1	1	1	1	1	1	1	1	1	1	1	1	1	1	1
OSCP1	1776	AP	3			0	0.993	0.5751	0.0311	0.0068	0.0155	0	0.0175	0	0	0.0224	0	0	0	0	0	0	0	0.0145	0	0	0	0	0	0	0	0	0	0	0	0	0	0	0	0	0	0	0	0	0	0	0	0	0
OSCP1	1777	AT	7			0	0.9965	0.7396	0.131	0.5059	0.45	0.3581	0.1412	0.2436	0.296	0.4415	0.5485	0.409	0.1521	0.6527	0.3632	0.37	0.278	0.3753	0.4426	0.4431	0.7038	0.201	0.388	0.4088	0.3293	0.5526	0.2572	0.3339	0.282	0.2975	0.2356	0.377	0.2986	0.1949	0.4342	0.4805	0.1478	0.5025	0.3031	0.5369	0.6347	0.3635	0.2843
OSCP1	1778	AT	13.2			0	0.9965	0.7396	0.131	0.4941	0.55	0.6419	0.8588	0.7564	0.704	0.5585	0.4515	0.591	0.8479	0.3473	0.6368	0.63	0.722	0.6247	0.5574	0.5569	0.2962	0.799	0.612	0.5912	0.6707	0.4474	0.7428	0.6661	0.718	0.7025	0.7644	0.623	0.7014	0.8051	0.5658	0.5195	0.8522	0.4975	0.6969	0.4631	0.3653	0.6365	0.7157
OSCP1	1779	ES	11.2:12:13.1	11.1	13.2	0	0.9948	0.0533	0.0039	1	1	1	1	1	1	1	1	1	1	1	1	1	1	1	1	1	1	1	1	1	1	1	1	1	1	1	1	1	1	1	1	1	1	1	1	1	1	1	1
OSCP1	1780	ES	2	1	4	0	0.9284	0.1716	0.0258	0.0341	0.0305	0	0	0	0	0	0.0398	0.0585	0	0.0274	0	0	0	0	0	0	0.0354	0.0098	0	0	0.0635	0	0	0.0098	0	0	0	0	0	0	0.0694	0.0328	0.0635	0.0112	0	0	0	0.0301	0.0338
CSF3R	1786	RI	17.3	17.2	17.4	0	1	0.135	0.0103	0.998	0.9937	1	0.9954	0.9886	0.9913	0.9941	1	1	0.9877	0.9924	1	0.9904	1	1	1	0.9937	0.9864	0.9954	0.9958	0.9695	1	0.9959	0.9836	0.9941	0.997	1	0.9961	1	0.9875	0.9957	1	1	0.9923	1	1	1	1	0.9935	0.9907
CSF3R	1787	AA	17.1	16	17.2	0	0.9267	0.3846	0.0505	0.1592	0.0882	0.0706	0.1377	0.1316	0.1929	0.0768	0.2293		0.15	0.0925	0.0781	0.087	0.1052	0.0385	0.0495	0.1623	0.0452	0.1086	0.121	0.0756	0.0692	0.1333	0.0254	0.0763	0.2066	0.0865	0.108	0.0611	0.0663	0.0755	0		0.1244	0.0902	0.1078	0.1698		0.038	0.0799
CSF3R	1788	ES	15	14	16	0	0.993	0.0328	0.0022	0.9994	1	1	1	1	1	1	1	1	0.9914	1	1	1	1	1	1	1	1	1	1	1	1	1	1	1	1	1	1	1	1	1	1	1	1	1	1	1	1	1	1
MEAF6	1792	AP	2.1			0	1	0.6258	0.0304	0.0018	0.001	0	0.0009	0.0048	0.0007	0.0028	0.0002	0.0016	0.0027	0.0033	0.0005	0	0.0031	0	0.0008	0.0016	0.001	0.0014	0	0	0.0007	0.0016	0.0005	0	0.0007	0.0041	0.0022	0	0.0013	0.0021	0	0.0008	0	0.0014	0	0	0	0	0
MEAF6	1793	AP	1			0	1	0.6258	0.0304	0.9982	0.999	1	0.9991	0.9952	0.9993	0.9972	0.9998	0.9984	0.9973	0.9967	0.9995	1	0.9969	1	0.9992	0.9984	0.999	0.9986	1	1	0.9993	0.9984	0.9995	1	0.9993	0.9959	0.9978	1	0.9987	0.9979	1	0.9992	1	0.9986	1	1	1	1	1
MEAF6	1794	AT	8.2			0	1	0.0974	0.0059	0	0	0	0.0044	0	0	0	0	0	0.0103	0.0063	0.003	0.0061	0	0	0	0	0.0071	0	0	0	0	0.0058	0.0077	0	0	0	0	0	0	0	0	0	0	0	0	0	0	0	0
MEAF6	1795	AT	9.2			0	1	0.0974	0.0059	1	1	1	0.9955	1	1	1	1	1	0.9897	0.9937	0.997	0.9939	1	1	1	1	0.9929	1	1	1	1	0.9942	0.9923	1	1	1	1	1	1	1	1	1	1	1	1	1	1	1	1
MEAF6	1799	ES	7:8.1:9.1	5	9.2	1	0.9599	0.3727	0.0666	0.8945	0.825	0.9079	0.884	0.7991	0.9321	0.8491	0.9007	0.7964	0.7494	0.8774	0.8013	0.8006	0.8907	0.8496	0.8161	0.8789	0.8954	0.8536	0.847	0.8546	0.8906	0.8794	0.8245	0.8346	0.7897	0.8674	0.8401	0.8182	0.8311	0.7085	0.8787	0.6144	0.9055	0.8557	0.7669	0.8138		0.7724	0.8097
MEAF6	1801	ES	8.1:9.1	5	9.2	0	1	0.1709	0.0204	0.9574	0.9734	0.978	0.9797	0.9778	0.9909	0.9596	0.9855	0.9779	0.9717	0.9748	0.9504	0.9598	0.9754	0.975	0.9853	0.9821	0.9849	0.9938	0.9508	0.9645	0.9873	0.9682	0.971	0.9771	0.9398	0.9681	0.975	0.9662	0.9606	0.9641	0.9827	0.9777	0.9885	0.9833	0.9477	0.9693	0.9933	0.9785	0.955
MEAF6	1802	ES	6	5	7	1	0.8761	0.8856	0.0924	0	0.0138	0	0.0076		0.0711	0	0		0.057	0.0097	0	0	0	0		0	0.0314	0	0.0167	0	0.0301	0	0	0	0.0255	0	0	0.1194	0.0131		0.0398			0.0355	0	0.023	0.5627	0.0183	0.0371
MEAF6	1803	ES	06:07:00	5	8.1	0	1	0.382	0.0309	0	0.0018	0	0.0012	0	0.0098	0	0	0.0108	0.0053	0.0018	0	0	0	0	0.0106	0	0.0043	0	0.005	0	0.0033	0	0	0	0.0064	0	0	0.022	0.0028	0.0046	0.0054	0.0055	0	0.0037	0	0.0031	0.1487	0.0013	0.0077
MEAF6	1804	ES	7	5	8.1	1	0.9895	0.4356	0.0597	0.287	0.1203	0.1876	0.1448	0.0873	0.1169	0.1976	0.1245	0.0842	0.0843	0.1646	0.1802	0.1496	0.1786	0.1298	0.0656	0.1211	0.123	0.0365	0.237	0.1854	0.1022	0.2024	0.1294	0.1128	0.2031	0.1855	0.1246	0.1442	0.1771	0.0872	0.1185	0.0368	0.1039	0.0972	0.1608	0.1266	0.1233	0.0729	0.1752
MEAF6	1805	ES	6	5	8.1	0	1	0.6107	0.0476	0	0.0011	0.0033	0.0009	0	0	0	0.0084	0.0086	0	0.0012	0.0013	0.0092	0.0047	0	0.0121	0	0.0032	0.0033	0.0038	0	0.0024	0.0047	0	0.0022	0.0049	0	0.0019	0	0.0024	0.0028	0.0043	0.0046	0	0.0134	0	0.0016	0.1999	0.0008	0.0052
DNALI1	1806	ES	3	2	4	0	0.9791	0.5633	0.0723	0.9693	0.9047	0.8708	0.8933	0.4367	0.9793	1	1	1	0.9678	0.9501	0.9924	0.9149	0.9877	0.9609		0.9655	0.9598	0.9701	1	0.9037	0.9888	0.9834	0.7763	0.9918	0.9666	0.9343	0.9801	0.9301	0.9301	0.9278	0.949	1	0.9232	0.9901	1	0.9569	0.8451	0.9583	0.9813
C1orf109	1814	AP	3.1			0	0.9634	0.6452	0.1082	0.836	0.8402	0.9116	0.768	0.616	0.8319	0.7	0.9277	0.7707	0.7121	0.6302	0.7016	0.7359	0.5556	0.7857	0.8226	0.6471	0.7857	0.7941	0.8462	0.8531	0.914	0.8081	0.8105	0.7207	0.7302	0.7333	0.7993	0.75	0.569	0.7759	0.5789	0.7857	0.8176	0.833	0.7424	0.901	0.7857	0.6335	0.6471
C1orf109	1815	AP	1			0	0.9634	0.6452	0.1082	0.164	0.1598	0.0884	0.232	0.384	0.1681	0.3	0.0723	0.2293	0.2879	0.3698	0.2984	0.2641	0.4444	0.2143	0.1774	0.3529	0.2143	0.2059	0.1538	0.1469	0.086	0.1919	0.1895	0.2793	0.2698	0.2667	0.2007	0.25	0.431	0.2241	0.4211	0.2143	0.1824	0.167	0.2576	0.099	0.2143	0.3665	0.3529
C1orf109	1816	AA	6.1	5	6.2	0	0.8778	0.4586	0.0639	0.1847	0.17	0.0513	0.1106	0.0546	0.0233	0.1334	0.0361	0.0593	0.0603	0.0614	0.0546	0.1273	0.0648	0.0648	0.025	0	0.026	0.0305	0.027	0	0	0.0358	0.1067	0.0442	0.0097	0.1653	0.0884	0.1477	0.0715	0	0.0392	0.0392	0.0648	0.095	0.0339	0.0763		0.109	0
C1orf109	1817	AD	4.3	4.2	5	0	0.9668	0.1852	0.0269	0.9765	1	1	0.9638	1	0.9837	1	1	1	0.9792	0.975	1	1	1	1	1	1	1	0.9823	0.9818	1	1	1	1	1	1	0.9326	0.979	1	1	1	1	0.9651	1	1	1	1	1	0.9903	0.9686
CDCA8	1821	RI	1.2	1.1	1.3	0	0.8307	0.6271	0.1167	0.7476	1	0.7578	0.6944	0.6816	0.7962	0.7405	0.6186	0.9049	0.7353	0.6531	0.7428	0.7405	0.6555	0.5487	0.7778	0.6356	0.716	0.7603	0.9027	0.8839	0.7271	0.7976	0.7323	0.8318	0.7323	0.685	0.5114	0.6472	1	0.7788	0.513	0.813	0.7508	0.8017	0.8022	0.7819		0.7384	0.588
EPHA10	1825	AT	21			0	0.9983	0.4015	0.0842	0.0467	0.1648	0	0.0623	0.0507	0	0	0.1162	0	0.0635	0.2173	0	0	0.2066	0	0	0	0.2342	0	0	0	0.1621	0	0.0623	0.0617	0	0	0.1313	0	0	0	0.2019	0	0	0.0267	0	0	0	0.0667	0
EPHA10	1826	AT	3.2			0	0.9983	0.4015	0.0842	0.9533	0.8352	1	0.9377	0.9493	1	1	0.8838	1	0.9365	0.7827	1	1	0.7934	1	1	1	0.7658	1	1	1	0.8379	1	0.9377	0.9383	1	1	0.8687	1	1	1	0.7981	1	1	0.9733	1	1	1	0.9333	1
EPHA10	1828	RI	19.3	19.2	19.4	0	0.9738	0.0805	0.0048	1	0.9647	1	1	1	1		1	1	1	1	1	1	1	1	1	1	1	1	1	1	1	1	1	1	1	1	1	1	1	1	1	1	1	1	1	1	1	1	1
EPHA10	1829	RI	19.2:19.3	19.1	19.4	0	0.9738	0.2645	0.0156	1	1	1	1	0.9657	1		1	1	1	1	1	1	1	1	1	1	1	0.9556	1	1	1	1	1	1	1	1	0.9831	1	1	1	1	1	1	1	1	1	1	1	1
MANEAL	1833	AP	1			0	0.9721	0.4754	0.0299	0.9915	1	1	1	0.9687	0.9924	1	1	1	1	0.9855	1	1	1	1	1	1	1	1	1	1	1	1	1	1	1	1	1	1	0.9823	1	1	1	1	0.9939	1	1	1	0.9944	1
MANEAL	1834	AP	2.1			0	0.9721	0.4754	0.0299	0.0085	0	0	0	0.0313	0.0076	0	0	0	0	0.0145	0	0	0	0	0	0	0	0	0	0	0	0	0	0	0	0	0	0	0.0177	0	0	0	0	0.0061	0	0	0	0.0056	0
MANEAL	1835	AA	4.1	3	4.2	0	0.9773	0.7684	0.1101	0.7347	0.7634	0.8251	0.7981	0.7087	0.6771	0.4106	0.7941	0.8483	0.7497	0.7534	0.8128	0.8258	0.8107	0.6883	0.7871	0.8785	0.6916	0.7624	0.6565	0.9083	0.7396	0.8154	0.9156	0.7332	1	0.906	0.7285	1	0.7786	0.7377	0.5031	0.7105	0.8034	0.6985	0.5036	0.7804	0.5769	0.6561	0.6739
MANEAL	1836	ES	3	2.3	4.1	0	0.9127	0.4386	0.0659	0.9521	0.8815	1	0.8101	0.8212	0.8408		1	1	0.9951	0.9851	0.9319	0.9559	0.8895	0.902	0.9204	0.7953	0.8794	0.9842	0.8485	0.9337	0.9547	1	1	0.8725	0.8544	1	0.9741	1	0.9362	0.8276	0.6884	0.9294	0.9822	0.8956	0.7905	1	0.9155	0.9674	0.9027
C1orf122	1841	RI	1.2:1.3	1.1	1.4	0	0.9511	0.2733	0.0257	0.0743	0	0.0155	0.038	0.0087	0.0047	0.0119	0.0115	0	0.0064	0.0094	0.0096	0.0049	0	0	0	0	0.0041	0.0022	0.0055	0	0.0236	0.0217	0.0166	0.009	0.0236	0	0.0128	0	0	0.0051	0.0116	0	0.0116	0.0082	0	0	0.0133	0.0279	0
C1orf122	1842	AD	1.2	1.1	1.4	0	0.9511	0.1928	0.031	0.0406	0	0.0423	0.0796	0.0586	0.0022	0.0248	0.0128	0	0.0252	0.051	0	0.0137	0	0	0.0321	0	0.0748	0.037	0.0303	0	0	0.0195	0.0079	0.0054	0.0354	0	0.018	0	0.0191	0.0281	0.0082	0	0.0474	0.0116	0.0192	0.0468	0	0.0151	0.0695
INPP5B	1848	AT	7.3			0	1	0.4487	0.0486	0.1002	0.0675	0.0712	0.095	0.1602	0.0799	0.1299	0.0911	0.1684	0.0907	0.0912	0.0741	0.0844	0.0928	0.1066	0.1031	0.1016	0.0809	0.0886	0.1475	0.0948	0.0574	0.0887	0.0778	0.0708	0.098	0.073	0.0765	0.0613	0.0563	0.0716	0.055	0.0574	0.0447	0.121	0.0447	0.0448	0.0596	0.0743	0.062
INPP5B	1849	AT	24			0	1	0.4487	0.0486	0.8998	0.9325	0.9288	0.905	0.8398	0.9201	0.8701	0.9089	0.8316	0.9093	0.9088	0.9259	0.9156	0.9072	0.8934	0.8969	0.8984	0.9191	0.9114	0.8525	0.9052	0.9426	0.9113	0.9222	0.9292	0.902	0.927	0.9235	0.9387	0.9437	0.9284	0.945	0.9426	0.9553	0.879	0.9553	0.9552	0.9404	0.9257	0.938
INPP5B	1850	AA	16.1	15	16.2	0	0.8988	1	0.1282	0.2127	0.1348	0.0915	0.3916	0.1024	0.0437		0.1789	0.0932	0.128	0.3393	0.1725	0.1574	0.1763	0.2756	0.0815	0.0367	0.2305	0.1378	0.2365	0.0641	0.212	0.0976	0.112	0.3035	0.1704		0.1784	0.1138	0.2188	0.2333	0.1462	0.2997	0.1164	0.3335	0.3701	0.2062		0.1224	0.041
INPP5B	1851	ES	13	12	14	0	0.9895	0.2996	0.024	0.9947	1	1	0.984	1	1	1	1	1	0.989	0.974	1	1	1	1	0.9809	1	1	0.9733	1	1	1	1	1	1	1	1	0.9892	1	0.9704	1	0.9604	1	1	1	1	1	1	1	1
INPP5B	1852	AD	7.2	7.1	8	0	0.815	0.9711	0.2352	0.8987	0.558	0.5257	0.3961	0.2635	0.4721		0.6032		0.9148	0.7983	0.7836	0.315	0.8656	0.6356	0.2669	0.2115	0.2115	0.2635	0.3195	0.7469	0.4843	0.7667	0.7592	0.5176	0.2731	0.3764	0.738		0.836		0.6168	0.2435	0.6525	0.4619	0.5257	1		0.2384	0.738
SF3A3	1853	ES	03:04:00	2	5	0	1	0.0942	0.0135	1	0.9851	0.9797	0.9833	1	0.9907	0.9773	0.9952	0.9733	0.9889	0.9931	0.9833	0.9969	0.9902	0.9546	0.9967	0.9783	0.9837	0.9825	0.994	0.9943	0.9808	0.9799	0.9729	0.9862	0.9917	0.991	0.9878	0.9798	0.9904	0.9693	0.9789	1	0.978	0.9891	0.9855	0.9835	1	0.9899	0.9872
UTP11L	1854	ES	6	5	7	0	1	0.0224	0.0026	1	1	1	1	1	1	1	1	1	1	0.9967	1	0.9964	1	1	0.997	1	1	1	1	1	1	1	1	0.9964	1	1	0.9978	1	1	1	1	1	1	1	1	1	1	0.9981	1
GJA9	1855	AP	1			0	0.7818	0.9011	0.159	0.8755	0.9435		0.8754	0.7406	0.7376		0.7867	0.6125	0.6496	0.7394	0.8635	1	0.8682				0.8145	0.9634	0.6372	0.4127	0.8877	0.9111	0.7133	0.9062	0.5278	0.8541	0.8707		0.7072		0.5941	0.9195	0.7249	0.6125		0.7456		0.7491
GJA9	1856	AP	2.1			0	0.7818	0.9011	0.159	0.1245	0.0565		0.1246	0.2594	0.2624		0.2133	0.3875	0.3504	0.2606	0.1365	0	0.1318				0.1855	0.0366	0.3628	0.5873	0.1123	0.0889	0.2867	0.0938	0.4722	0.1459	0.1293		0.2928		0.4059	0.0805	0.2751	0.3875		0.2544		0.2509
GJA9	1857	AT	2.3			0	0.8394	0.5314	0.0961	0.1515	0.218	0.0464	0.0549	0.2532	0.0254		0.0425		0.1185	0.103	0.0336	0.049	0.0185		0.1269	0.2892	0	0.1301	0.1623	0.0635	0.0363	0.0496	0.1522	0.0129	0.1883	0.0635	0.08	0	0		0.0363	0.0945	0.1194	0.1015	0.0887	0.1085	0.1623	0.0508
GJA9	1858	AT	7			0	0.8394	0.5314	0.0961	0.8485	0.782	0.9536	0.9451	0.7468	0.9746		0.9575		0.8815	0.897	0.9664	0.951	0.9815		0.8731	0.7108	1	0.8699	0.8377	0.9365	0.9637	0.9504	0.8478	0.9871	0.8117	0.9365	0.92	1	1		0.9637	0.9055	0.8806	0.8985	0.9113	0.8915	0.8377	0.9492
RHBDL2	1859	AP	1			0	0.9983	0.9729	0.2076	0.7963	0.9033	0.8392	0.9058	0.7529	0.8853	0.6902	0.9338	0.7015	0.5109	0.8845	0.9378	0.9656	0.8372	0.8221	0.5027	0.8873	0.8784	0.8948	0.7192	0.8489	0.8983	0.8958	0.7786	0.8514	0.8123	0.9165	0.8727	0.7817	0.9	0.7412	0.9236	0.9729	0.9595	0.6842	0.7679	0.8294	0.6602	0.8755	0.2904
RHBDL2	1860	AP	3			0	0.9983	0.9729	0.2007	0.1921	0.0967	0.1608	0.0942	0.2471	0.1147	0.3098	0.0662	0.2985	0.4792	0.1155	0.0622	0.0344	0.1628	0.1779	0.4973	0.1127	0.1216	0.1052	0.2808	0.1511	0.1017	0.1042	0.2214	0.1486	0.1877	0.0835	0.1273	0.2183	0.1	0.2588	0.0764	0.0271	0.0405	0.2924	0.2321	0.1706	0.2305	0.1245	0.7096
RHBDL2	1861	AP	2			0	0.9983	0.4506	0.0349	0.0116	0	0	0	0	0	0	0	0	0.01	0	0	0	0	0	0	0	0	0	0	0	0	0	0	0	0	0	0	0	0	0	0	0	0	0.0234	0	0	0.1094	0	0
RHBDL2	1862	AT	5.2			0	1	0.2714	0.0313	0.0189	0.0099	0	0.0152	0	0	0	0	0.0352	0.0407	0.0159	0.0038	0	0.0267	0.0335	0	0	0.0093	0	0	0.0168	0.0243	0	0.0621	0	0.0596	0.013	0	0	0.0445	0	0.0386	0	0	0	0	0	0	0	0
RHBDL2	1863	AT	10			0	1	0.2714	0.0313	0.9811	0.9901	1	0.9848	1	1	1	1	0.9648	0.9593	0.9841	0.9962	1	0.9733	0.9665	1	1	0.9907	1	1	0.9832	0.9757	1	0.9379	1	0.9404	0.987	1	1	0.9555	1	0.9614	1	1	1	1	1	1	1	1
AKIRIN1	1864	ES	3	2	4	0	1	0.0468	0.0088	0.9833	0.9893	0.9908	0.9806	1	0.9717	0.9836	0.9878	0.9844	0.9724	0.9939	0.9894	0.9969	1	0.9919	0.9971	0.9822	0.9945	0.9828	0.9867	0.9936	0.9919	0.9874	0.9806	0.9826	0.9922	0.9807	0.9921	1	0.9909	0.9827	0.9801	0.9793	0.9823	0.9956	0.9837	0.9846	1	0.9929	0.995
AKIRIN1	1866	ES	2	1	3	0	1	0.0311	0.0029	1	1	1	1	1	1	1	1	1	1	0.9963	0.9979	1	1	1	1	1	1	0.9963	1	1	1	1	1	1	1	0.9906	1	1	1	1	0.9934	1	1	1	0.9954	1	1	0.9963	1
NDUFS5	1869	AD	1.2	1.1	2	0	1	0.6133	0.1623	0.5337	0.2083	0.5597	0.2425	0.5377	0.5598	0.5274	0.5467	0.5236	0.2545	0.524	0.553	0.5632	0.5028	0.5264	0.1433	0.5323	0.5261	0.5583	0.4712	0.5538	0.2272	0.197	0.5718	0.3831	0.232	0.5297	0.5329	0.3472	0.555	0.5395	0.5735	0.573	0.5613	0.5153	0.5276	0.516	0.5378	0.5623	0.5479
MACF1	1877	AT	109			0	1	0.226	0.0183	0.9993	0.9983	1	0.9989	0.9992	0.9992	1	0.9983	0.9987	0.9972	0.9997	0.9997	1	1	1	1	0.9987	1	0.996	0.9993	0.9992	0.9975	0.9984	0.9986	0.9994	0.9971	1	1	1	1	0.9965	0.995	1	1	0.9996	1	0.9979	1	1	1
MACF1	1879	AT	4			0	1	0.0393	0.0026	0.0007	0	0	0.0005	0.0008	0.0008	0	0.0018	0	0.0028	0	0.0003	0	0	0	0	0.0013	0	0.0023	0	0.0008	0.0025	0.0008	0.0007	0.0006	0.0021	0	0	0	0	0	0.005	0	0	0.0004	0	0.0021	0	0	0
MACF1	1880	AT	12.2			0	1	0.1981	0.0168	0	0.0017	0	0.0006	0	0	0	0	0.0013	0	0.0003	0	0	0	0	0	0	0	0.0017	0.0007	0	0	0.0008	0.0007	0	0.0008	0	0	0	0	0.0035	0	0	0	0	0	0	0	0	0
MACF1	1881	ES	107	106	108	0	1	0.7636	0.1437	0.653	0.6472	0.5832	0.6816	0.6253	0.7351	0.5587	0.6886	0.7679	0.6825	0.4851	0.7753	0.6555	0.5357	0.7166	0.3385	0.6313	0.6061	0.3229	0.6107	0.6332	0.6144	0.6146	0.8041	0.4511	0.6639	0.7393	0.5949	0.2676	0.6624	0.6505	0.6315	0.7235	0.7263	0.6637	0.49	0.5606	0.3988	0.4118	0.3477
MACF1	1882	ES	105	104	106	0	0.9983	0.1514	0.01	0	0	0	0.0017	0	0	0	0	0	0	0.0042	0	0	0	0	0.0047	0.0044	0	0	0	0.0041	0.0062	0.0022	0.002	0	0	0	0	0	0	0	0	0	0	0	0	0		0	0
MACF1	1883	ES	103	102	104	0	1	0.7097	0.1041	0.7865	0.8051	0.7654	0.7405	0.78	0.786	0.5847	0.729	0.7135	0.76	0.5344	0.8291	0.7601	0.6265	0.8278	0.5495	0.667	0.7339	0.8807	0.6318	0.6496	0.7296	0.8222	0.8762	0.6453	0.739	0.7544	0.7298	0.5093	0.5972	0.6057	0.9152	0.8102	0.8082	0.733	0.7863	0.8364	0.7686	0.8087	0.7213
MACF1	1885	ES	77	76.1	79	0	0.9511	0.3288	0.0501	0.9791	1	1	0.9802	1	1	1	1	1	1	0.9905	1	0.9725	1	1	0.9603	0.9853	1	1	0.9646	0.9547	1	0.9914	1	0.9533	1	0.9305	0.9879		1	1		1	0.9578	0.9621		1		1	0.9336
MACF1	1886	ES	69	68	70	0	0.9913	0.0249	0.0027	1	1	1	1	1	1	1	1	1	1	1	1	1	1	0.9844	1	1	1	1	1	1	1	1	1	1	1	1	1	1	1	1	1	1	1	1	1	1	1	0.9873	1
MACF1	1887	ES	59	58	60	0	0.8831	0.6518	0.1388	0.8912	0.9344	1	0.9655	0.8651	0.9333			0.8908	0.8908	0.8908	0.921	1	0.9381	0.9402	0.7985	0.9491		0.8702	0.6361	0.7776	0.8234	0.8187	0.9423	0.8749	0.8779	0.7537	0.7655			0.8651			1	0.9276				0.671	0.5382
MACF1	1888	ES	43.2:44:45:46:47	42	48	0	0.9372	1	0.2714	0.2508	0.236	0.0942	0.0877	0.2032	0.1638	0.0794	0.0483	0.1386	0.0639	0.1367	0.0541	0.0995	0.1479	0.1091	0.1489	0.2427	0.0978	0.0231	0.3224	0.4958	0.054	0	0.0485	0.3837	0.1816	0.3625	0.1843		0.1118	1		0.0305	0.1556	0.1882				0.1789	0.4948
MACF1	1889	ES	29	28	30	0	0.8761	0.3717	0.0268	1	1	1	1	1	1	1	1	1	1	1	1	1	1	0.8731	1	1		1	0.8528	1	1	1	1	1	1	1	1		1			1	1	1		1		1	1
PABPC4	1893	ES	11	10.2	12	0	1	0.3486	0.0426	0.9119	0.9438	0.9604	0.9063	0.9712	0.919	0.9548	0.9624	0.9536	0.8732	0.9493	0.94	0.9321	0.9266	0.9593	0.9495	0.9316	0.9483	0.9793	0.9446	0.8412	0.9259	0.9163	0.9317	0.8126	0.924	0.9631	0.9225	0.9341	0.9403	0.9664	0.9613	0.9263	0.8907	0.9518	0.8861	0.9464	0.877	0.8847	0.915
PABPC4	1894	ES	10.2:11	10.1	12	0	1	0.1563	0.0177	0.9661	0.9845	0.9812	0.9682	0.992	0.9898	0.9544	0.9885	0.9663	0.989	0.9934	0.9829	0.9911	0.972	0.9935	0.9956	0.9821	0.9734	0.9896	0.9766	0.9717	0.9798	0.9738	0.9937	0.9402	0.9798	0.9742	0.9787	1	0.9671	0.9879	0.9765	1	0.9531	0.9881	0.9666	0.9856	0.9618	0.9825	0.96
PABPC4	1895	ES	11	10.1	12	0	0.9965	0.2661	0.0426	0.9019	0.9532	0.9556	0.925	0.9855	0.9594	0.8944	0.9698	0.9335	0.9508	0.9856	0.9647	0.9669	0.8875	0.9819	0.9909	0.9386	0.9254	0.975	0.9488	0.9131	0.9267	0.9249	0.9813	0.8705	0.9352	0.9302	0.9429	1	0.9276	0.9587	0.9558	1	0.8362	0.9697	0.9185	0.9693	0.9037	0.9273	0.9295
PABPC4	1896	AD	10.2	10.1	12	0	0.9843	0.5974	0.0904	0.7577	0.8145	0.7046	0.79	0.806	0.9074	0.5447	0.7935	0.6148	0.9394	0.9014	0.8115	0.9041	0.7675	0.8844	0.9326	0.8253	0.7045	0.7047	0.7356	0.8811	0.8235	0.7988	0.9313	0.8123	0.8275	0.6341	0.8236	1	0.6808	0.7612	0.6664	1	0.7511	0.8309	0.8138	0.8205	0.8012	0.8947	0.7251
PABPC4	1897	AD	10.2	10.1	11	0	1	0.4214	0.0488	0.758	0.7597	0.7135	0.7206	0.6572	0.8096	0.7225	0.7367	0.6838	0.8317	0.6971	0.6899	0.7989	0.821	0.7485	0.685	0.7884	0.7545	0.7182	0.6999	0.7733	0.7999	0.7576	0.7621	0.7139	0.7785	0.7456	0.7454	0.7779	0.7065	0.7839	0.6709	0.7763	0.8112	0.7339	0.7254	0.6924	0.7371	0.8203	0.6616
HEYL	1898	AP	1			0	0.8866	0.745	0.1503	0.9064	0.7896	0.7315	1	0.4808	0.857	0.74	0.6607	0.529	0.6967	0.7433	0.9212	0.775	0.4612	1	1	0.6075	0.6223	0.7449	0.8756	0.7163	1	0.8303	0.5741	0.8359	0.5873	0.5996	0.7651		0.718	0.8359	0.7056	1	0.4026	0.7534	0.663	0.6794	0.7056	0.6293	0.8037
HEYL	1899	AP	2			0	0.8866	0.745	0.1503	0.0936	0.2104	0.2685	0	0.5192	0.143	0.26	0.3393	0.471	0.3033	0.2567	0.0788	0.225	0.5388	0	0	0.3925	0.3777	0.2551	0.1244	0.2837	0	0.1697	0.4259	0.1641	0.4127	0.4004	0.2349		0.282	0.1641	0.2944	0	0.5974	0.2466	0.337	0.3206	0.2944	0.3707	0.1963
PPIE	1900	AT	9.2			0	1	0.115	0.008	0.0093	0.0013	0.0025	0.0044	0.0018	0.0055	0.0103	0.0011	0.0281	0.0066	0.0039	0.0049	0.0011	0.0163	0.0192	0.0015	0.0059	0.0046	0.0063	0.0121	0.0029	0.0023	0.0078	0.0033	0.0042	0.0012	0.0041	0.0063	0	0	0.0022	0.0084	0	0.004	0.0033	0.0036	0.0019	0	0.0026	0.004
PPIE	1901	AT	10			0	1	0.4618	0.0743	0.8437	0.8155	0.9361	0.8166	0.8202	0.9235	0.8302	0.9308	0.7525	0.6678	0.8824	0.8474	0.8341	0.8376	0.8096	0.8716	0.7919	0.7793	0.8141	0.8118	0.8298	0.7647	0.7339	0.9066	0.8995	0.8495	0.8344	0.7294	0.8424	0.845	0.7653	0.8814	0.8056	0.8631	0.8465	0.9439	0.9416	0.8965	0.8635	0.8147
PPIE	1902	AT	12			0	1	0.4652	0.0725	0.147	0.1832	0.0614	0.179	0.178	0.0711	0.1595	0.0682	0.2194	0.3256	0.1137	0.1477	0.1649	0.1461	0.1712	0.1269	0.2022	0.216	0.1796	0.1761	0.1673	0.2331	0.2584	0.0901	0.0963	0.1493	0.1615	0.2643	0.1576	0.155	0.2325	0.1101	0.1944	0.1329	0.1502	0.0526	0.0565	0.1035	0.1339	0.1813
PPIE	1903	ES	11	9.1	12	0	0.9895	0.7762	0.1259	0.7771	0.7268	0.6803	0.6691	0.7226	0.5489	0.7031	0.4504	0.5536	0.5462	0.6791	0.5985	0.7195	0.8256	0.6636	0.2238	0.58	0.5771	0.4602	0.4864	0.6636	0.5028	0.3586	0.7031	0.5365	0.4545	0.6122	0.6672	0.8369	0.3214	0.4775	0.5279	0.6122	0.58	0.574	0.5256	0.5296	0.58	0.4815	0.5181
PPIE	1904	AD	7.2	7.1	8	0	1	0.95	0.1345	0.2575	0.0266	0.0154	0.1699	0.2443	0.0596	0.2047	0.0192	0.4201	0.0844	0.0383	0.0335	0.0298	0.1624	0.2045	0.0215	0.1296	0.1996	0.0321	0.2555	0.0604	0.0574	0.0191	0.083	0.0141	0.025	0.3822	0.2948	0.1687	0.0587	0.0812	0.1946	0.0704	0.0428	0.0706	0.0098	0.0189	0.1616	0.0156	0.0165
PPIE	1905	ES	7.1:7.2	6	8	0	1	0.8318	0.1682	0.9775	0.4838	1	0.9528	0.9432	0.8661	1	0.7295	1	0.9226	0.7489	0.9008	0.7956	1	1	0.7086	1	1	0.7566	1	1	1	0.7734	0.759	0.543	0.7372	1	1	1	1	1	1	1	1	1	0.6422	1	1	0.6309	0.5066
PPIE	1906	ES	7.1	6	8	0	1	0.0715	0.0081	0.9959	0.9856	1	0.9946	0.9916	0.9949	1	0.9963	1	0.996	0.9939	0.9981	0.9962	1	1	0.9955	1	1	0.9944	1	1	1	0.9974	0.9885	0.994	0.9956	1	1	1	1	1	1	1	1	1	0.9974	1	1	0.9958	0.9924
PPIE	1907	AD	4.2	4.1	5	0	1	0.2317	0.024	0.0244	0.0114	0.0084	0.0159	0.0119	0.0043	0.0232	0.0041	0.025	0.0192	0.0113	0.0142	0.0035	0.0187	0.0299	0.0095	0.0055	0.0101	0.0206	0.0088	0.0195	0.0034	0.0219	0.0327	0.0079	0.0179	0.0237	0.0196	0.0098	0.0147	0.0108	0.0137	0.0167	0.0186	0.014	0.0015	0.0089	0	0.0105	0.0125
PPIE	1909	ES	00:04:01.100000	2	6	0	1	0.0166	0.002	0.9973	1	1	1	1	1	1	1	1	1	0.9968	0.9984	0.9971	1	1	1	1	1	1	1	1	1	1	1	1	1	1	1	1	1	1	1	1	1	1	1	1	1	1	1
PPIE	1910	AD	1.2	1.1	2	0	0.9948	0.7309	0.0616	0.8812	0.8798	0.8649	0.7944	0.8209	0.8683	0.8549	0.8881	0.5983	0.7715	0.8407	0.8204	0.8505	0.8903	0.8105	0.8933	0.8333	0.8807	0.8151	0.7595	0.9252	0.7624	0.8842	0.9122	0.899	0.8526	0.7931	0.8274	0.8088	0.8196	0.7524	0.7957	0.9006	0.8427	0.8951	0.7772	0.841	0.8563	0.7585	0.8696
BMP8B	1911	AT	6.2			0	1	0.8458	0.1374	0.2168	0.1552	0.0884	0.1144	0.4236	0.1418	0.0112	0.1443	0.1757	0.2519	0.1165	0.2037	0.2247	0.0654	0.1215	0.031	0.0876	0.2455	0.1419	0.1429	0.1131	0.1056	0.2028	0.0296	0.1096	0.0854	0.1488	0.2692	0.3134	0.1342	0.1634	0.079	0.1629	0.0395	0.1756	0.0939	0.1788	0	0.1169	0.2301
BMP8B	1912	AT	8			0	1	0.8458	0.1374	0.7832	0.8448	0.9116	0.8856	0.5764	0.8582	0.9888	0.8557	0.8243	0.7481	0.8835	0.7963	0.7753	0.9346	0.8785	0.969	0.9124	0.7545	0.8581	0.8571	0.8869	0.8944	0.7972	0.9704	0.8904	0.9146	0.8512	0.7308	0.6866	0.8658	0.8366	0.921	0.8371	0.9605	0.8244	0.9061	0.8212	1	0.8831	0.7699
TRIT1	1913	AT	12			0	1	0.2537	0.0263	0.9491	0.991	1	0.9854	0.9883	0.9797	0.9889	1	0.9944	0.9978	0.9868	0.9943	0.9973	0.9913	0.9935	0.9882	1	0.9952	0.9762	0.9819	1	0.9859	1	0.9877	1	0.9844	0.9823	0.9872	0.9872	0.9844	1	0.9877	1	1	0.9876	1	0.9982	0.9962	0.9986	1
TRIT1	1914	AT	5			0	1	0.2537	0.0263	0.0509	0.009	0	0.0146	0.0117	0.0203	0.0111	0	0.0056	0.0022	0.0132	0.0057	0.0027	0.0087	0.0065	0.0118	0	0.0048	0.0238	0.0181	0	0.0141	0	0.0123	0	0.0156	0.0177	0.0128	0.0128	0.0156	0	0.0123	0	0	0.0124	0	0.0018	0.0038	0.0014	0
TRIT1	1916	ES	10	9	11	0	1	0.0423	0.0027	0.9913	1	1	1	1	1	1	1	1	1	0.996	1	1	1	1	1	1	0.9941	1	1	1	1	1	1	1	1	1	1	1	1	1	1	1	1	1	1	1	1	0.9954	1
TRIT1	1918	ES	9	8	10	0	1	0.0729	0.0087	0.9895	1	1	1	1	0.9892	1	1	1	1	1	0.9963	1	1	1	1	1	1	0.9896	1	1	1	1	1	1	0.9912	1	1	1	1	1	1	1	1	1	1	1	1	0.9949	1
TRIT1	1920	ES	8	7.2	9	0	1	0.1321	0.0168	0.9891	1	1	0.9848	1	1	0.9855	1	1	0.9905	0.9948	0.9958	0.989	1	1	0.9881	1	1	0.9838	0.9864	1	1	1	1	1	1	1	1	1	1	1	1	1	1	0.9878	1	0.9922	0.9615	1	1
TRIT1	1921	AA	7.1	6.2	7.2	0	0.9668	0.2155	0.026	1	1	1	0.9829	1	0.9769	1	0.9765	1	0.9581	1	0.9915	0.9716	1	0.9462	1	1	0.9884	0.9905	1	0.9695	1	0.94	1	0.9705	1	1	1	1	1	0.9425	1	0.9578	1	1	0.9818	0.9826	1	1	1
TRIT1	1922	AD	6.2	6.1	7.1	0	0.9476	0.5111	0.0935	0.6403	0.9452	0.8703	0.8516	0.9546	0.8843	0.8442	0.9701	0.9421	0.9096	0.8933	0.9107	0.8737	0.6906	0.8905	0.9718	0.9305	0.9395	0.8354	0.8473	1	0.8644	0.8345	0.8777	0.9326	0.8722	0.7051	0.8916	0.817	0.775	0.8836	0.809	0.8142	0.9348	0.8791	0.9199	0.8018	1	0.9039	0.8516
TRIT1	1923	ES	4	3.1	6.1	0	0.9983	0.3383	0.0558	0.9729	0.9453	0.9535	0.9326	0.9704	0.9411	0.9639	0.9818	0.967	0.9784	0.9351	0.961	0.9165	0.9418	1	0.947	0.9391	0.9641	0.9353	0.9412	0.9576	0.9719	0.8902	0.8166	0.8904	0.9565	0.9547	0.9538	0.8433	0.8697	0.9402	0.8664	0.9307	1	0.9687	0.8834	0.8863	0.9198	0.9662	0.905
TRIT1	1924	ES	2:3.1:4:6.1:6.2	1	7.1	0	1	0.23	0.032	1	0.9499	1	1	1	1	1	0.9702	0.963	0.993	0.9548	0.9934	1	0.9246	1	0.9733	1	0.9901	0.9827	0.9547	1	0.9218	0.9688	0.9791	0.9779	0.9758	1	0.9648	1	0.9145	1	0.9352	1	0.9575	0.984	0.9857	1	1	0.9745	0.9298
TRIT1	1926	ES	2:3.1:6.1:6.2	1	7.1	0	0.8272	0.6273	0.1562	1	0.6304	1	1	1	1	1	0.554		0.8579	0.7557	0.9221	1			0.8173		0.8607	0.8715	0.6691	1	0.3828	0.8688	0.9385	0.8973	0.7919	1	0.6914	1	0.678	1	0.7858	1		0.7675	0.9418	1	1	0.7266	0.7515
TRIT1	1928	ES	2:3.1:4:6.1	1	7.1	0	0.9023	0.6723	0.1378	1	0.5418	1	1	1	1	1	0.5192	0.6337	0.9393	0.7342	0.9424	1	0.8592	1	0.5251	1	0.8746	0.9193	0.8019		0.6624	0.8694	0.878	0.7549	0.857	1	0.7863	1	0.7795	1	0.7719	1	0.633	0.9002	0.8669	1		0.8124	0.7166
TRIT1	1932	ES	2:3.1:4:6.1:6.2:7.1:7.2:8:9	1	10	0	1	0.1567	0.0164	1	1	1	1	1	1	1	1	1	1	0.992	1	1	1	1	1	1	1	1	1	1	1	0.9733	1	0.928	0.9785	1	1	1	1	1	1	1	0.9636	1	0.9514	0.9886	1	0.9927	0.9394
TRIT1	1934	ES	2:3.1:6.1:6.2:7.1:7.2:8:9	1	10	0	0.8796	0.4821	0.077	1	1	1	1	1	1	1	1	1	1	0.9498	1	1	1		1	1	1	1	1	1	1	0.8892	1	0.724	0.8153	1	1	1	1	1	1	1		1	0.8259	0.9448	1	0.9076	0.7853
TRIT1	1936	ES	2:3.1:4:6.1:7.1:7.2:8:9	1	10	0	0.9075	0.5271	0.0832	1	1	1	1	1	1	1	1	1	1	0.9421	1	1	1	1	1	1	1	1	1		1	0.8867	1	0.4729	0.8711	1	1	1	1	1	1	1	0.6698	1	0.65	0.956		0.9391	0.7475
TRIT1	1971	ES	00:02:03.100000	1	4	0	0.9913	0.1861	0.0233		1	1	0.9873	0.9733	0.9851	1	0.9832	1	0.9786	0.9702	0.9862	1	1	1	1	1	1	0.9747	0.9284	1	1	1	0.9553	0.9531	1	1	1	0.9676	1	0.9676	1	0.9768	1	0.9661	1	0.9873	1	0.9342	1
TRIT1	1972	ES	00:03:01.100000	1	6.1	0	1	0.2688	0.0356	0.789	0.9498	0.969	0.9887	0.974	0.9862	0.9804	1	1	0.9934	0.9652	0.9638	1	1	1	0.9856	1	0.9712	0.9474	0.9203	1	0.9746	0.9609	0.9805	1	0.9826	1	1	0.9399	0.8968	1	0.9241	1	0.9587	0.9847	0.9722	1	0.9557	0.9597	0.8179
TRIT1	1974	ES	00:02:03.100000	1	6.1	0	0.7539	0.7789	0.1651	0.2218	0.6255	0.7001	0.9172		0.889	0.7227	1		0.8617	0.7988	0.6712	1			0.8909		0.6711	0.6766	0.5194	1	0.6635	0.8363	0.9413	1	0.8388	1	1	0.8235	0.6247	1	0.7507	1		0.7701	0.889	1	0.7503	0.6186	0.4943
MYCL	1975	AT	2			0	1	0.5361	0.0781	0.8626	0.8754	0.7964	0.8775	0.9205	0.7357	0.9292	0.9628	0.9854	0.8382	0.9529	0.9388	0.9104	0.9228	0.938	0.9055	0.7983	0.9048	0.966	0.799	0.8337	0.809	0.9373	0.922	0.9549	0.7496	0.9139	0.9463	0.8958	0.8854	0.9076	0.9503	0.8715	0.8056	0.8978	0.9434	0.9417	0.9498	0.9352	0.9355
MYCL	1976	AT	1.4			0	1	0.5361	0.0781	0.1374	0.1246	0.2036	0.1225	0.0795	0.2643	0.0708	0.0372	0.0146	0.1618	0.0471	0.0612	0.0896	0.0772	0.062	0.0945	0.2017	0.0952	0.034	0.201	0.1663	0.191	0.0627	0.078	0.0451	0.2504	0.0861	0.0537	0.1042	0.1146	0.0924	0.0497	0.1285	0.1944	0.1022	0.0566	0.0583	0.0502	0.0648	0.0645
MFSD2A	1978	AA	3.1	2	3.2	0	0.9162	0.8618	0.0583	0.0366	0.0084	0	0.0265	0	0.0288	0	0	0.0561	0.0168	0.0669	0	0.0104	0.0428	0.0241		0	0	0.01	0.1334	0.0206	0.0086	0.0424	0.026	0.0164	0.0052	0	0.0299	0	0.0442	0	0	0.0546	0	0.0179	0			0	0
MFSD2A	1980	ES	00:02:03.200000	1	4	0	0.9948	0.1304	0.0087	1	1	1	1	1	1	1	1	0.9872	1	1	1	1	1	1	1	1	1	0.9928	1	1	1	1	1	0.9894	1	1	1	1	1	1	1	1	1	1	0.9532	1	1	1	0.9979
CAP1	1981	AA	3.1	2.2	3.2	0	1	0.1957	0.022	0.9043	0.9076	0.9244	0.9079	0.9048	0.9086	0.9534	0.8982	0.932	0.8977	0.901	0.902	0.9252	0.9138	0.9353	0.9231	0.9026	0.9112	0.8938	0.8921	0.8981	0.9115	0.9279	0.9101	0.9187	0.9041	0.9283	0.9182	0.8782	0.9318	0.9192	0.9157	0.9241	0.933	0.9342	0.9068	0.9174	0.8757	0.9007	0.9095
CAP1	1982	AA	2.1	1.2	2.2	0	0.9983	0.4622	0.0427	0.2921	0.268	0.2366	0.2874	0.2647	0.2504	0.2747	0.2656	0.2495	0.1242	0.2872	0.2551	0.2717	0.2864	0.2739	0.3149	0.2256	0.2865	0.3069	0.2279	0.2664	0.2386	0.2533	0.2148	0.2635	0.2475	0.3115	0.2617	0.2654	0.2883	0.3026	0.2182	0.3013	0.3039	0.3328	0.2645	0.238	0.2996	0.2655	0.31
CAP1	1983	AD	1.2	1.1	2.1	0	0.993	0.7437	0.0704	0.7553	0.7629	0.7307	0.725	0.7481	0.6867	0.6611	0.7275	0.6777	0.6408	0.7304	0.6868	0.7193	0.7179	0.6821	0.6828	0.7576	0.6412	0.64	0.7289	0.6604	0.8136	0.6407	0.6286	0.7596	0.6145	0.7958	0.7338	0.7402	0.7839	0.7645	0.6885	0.748	0.8256	0.7162	0.6789	0.7077	0.7489	0.604	0.7042
CAP1	1984	ES	1.2:2.1	1.1	2.2	0	0.9948	0.8181	0.0737	0.4979	0.5272	0.4943	0.4798	0.4705	0.4979	0.4515	0.4991	0.4053	0.207	0.5273	0.4811	0.4928	0.4636	0.5158	0.4868	0.4533	0.407	0.446	0.4264	0.5266	0.5124	0.445	0.4173	0.4371	0.4576	0.561	0.4733	0.5329	0.6105	0.4772	0.3496	0.5535	0.576	0.5482	0.4687	0.5025	0.5919	0.3958	0.5246
CAP1	1985	AA	2.1	1.1	2.2	0	0.9825	0.4908	0.0629	0.2422	0.2564	0.2638	0.2581	0.2293	0.3103	0.2956	0.2707	0.2438	0.127	0.2905	0.296	0.2738	0.2524	0.3306	0.3047	0.2087	0.2763	0.3105	0.2156	0.3626	0.1931	0.309	0.2962	0.1964	0.3449	0.2459	0.2447	0.2848	0.3006	0.2185	0.1947	0.2935	0.222	0.3234	0.2933	0.2933	0.3259	0.2993	0.3155
CAP1	1986	AD	1.2	1.1	2.2	0	0.9983	0.5121	0.0494	0.7052	0.7519	0.7583	0.6946	0.7105	0.747	0.6837	0.7327	0.6709	0.6468	0.7335	0.7292	0.7215	0.6817	0.7374	0.6724	0.7389	0.6296	0.6438	0.7146	0.7529	0.7692	0.7016	0.7225	0.6834	0.7184	0.7374	0.716	0.7585	0.7938	0.6766	0.6569	0.7408	0.7558	0.7075	0.7093	0.7628	0.7712	0.6431	0.7095
PPT1	1987	AP	1			0	0.9983	0.5584	0.0452	1	1	1	1	1	1	1	1	1	1	1	0.9979	1	1	1	1	1	1	1	1	1	1	0.9961	1	1	1	1	1	1	1	1	1	1	1	1	1	1	1	1	1
PPT1	1988	AP	6			0	0.9983	0.5584	0.0452	0	0	0	0	0	0	0	0	0	0	0	0.0021	0	0	0	0	0	0	0	0	0	0	0.0039	0	0	0	0	0	0	0	0	0	0	0	0	0	0	0	0	0
PPT1	1991	RI	10.2	10.1	10.3	0	1	0.0085	0.001	1	0.9989	1	1	1	1	1	0.9996	1	0.9982	1	0.9995	0.9992	1	1	1	0.9975	1	0.9996	0.9988	1	0.9986	1	1	0.9991	1	0.9974	1	1	1	1	0.999	1	1	1	1	1	1	0.9993	1
PPT1	1992	ES	9	8	10.1	1	0.7749	0.0643	0.0093	0.9678	0.9653	0.9556	0.9785	0.965	0.9807			0.9712	0.9711	0.966	0.9766	0.9668	0.9729			0.9528	0.9815		0.9668	0.976	0.9634	0.9772	0.9656	0.9725			0.9763	0.9517	0.9634	0.9815	0.9779	0.9506		0.9681	0.9657	0.9684	0.9571	0.9688	0.9694
PPT1	1993	AA	5.1	4	5.2	0	1	0.0737	0.0049	0.0028	0	0	0.0008	0	0.0005	0	0	0	0.0006	0.0019	0.001	0	0	0	0.0011	0	0.001	0.0004	0	0.0008	0	0.0009	0	0	0.0007	0.0042	0.0018	0.0018	0	0	0.0009	0	0	0.0023	0	0	0	0.0006	0
PPT1	1995	ES	02:03:04	1	5.2	0	1	0.0374	0.0019	0.9988	1	1	1	1	1	1	1	1	0.9996	1	1	1	1	1	1	1	1	1	1	0.9969	1	0.9966	1	1	0.9992	1	1	1	1	1	1	1	1	0.9972	1	1	0.9967	1	0.999
SMAP2	1996	AP	3			0	0.9983	0.671	0.064	0.0157	0.0106	0.0258	0	0	0	0	0	0	0	0.0062	0	0	0	0	0	0	0	0	0	0	0	0	0	0	0.0058	0	0	0	0	0.011	0	0	0	0	0	0	0	0	0
SMAP2	1997	AP	1			0	0.9983	0.7696	0.082	0.9543	0.9692	0.9373	0.9709	1	0.9254	0.9894	0.9217	1	0.9481	0.9643	0.9734	0.9796	0.9796	0.9518	0.9461	0.9521	0.9872	0.9661	0.9724	0.96	0.9829	0.9273	0.9492	0.9559	0.9608	0.9578	0.9342	0.9834	0.9318	0.968	1	1	0.9694	0.9396	0.9772	0.9646	0.8621	0.932	0.991
SMAP2	1998	AP	2			0	0.9983	0.2846	0.0414	0.03	0.0202	0.0369	0.0291	0	0.0746	0.0106	0.0783	0	0.0519	0.0295	0.0266	0.0204	0.0204	0.0482	0.0539	0.0479	0.0128	0.0339	0.0276	0.04	0.0171	0.0727	0.0508	0.0441	0.0334	0.0422	0.0658	0.0166	0.0682	0.021	0	0	0.0306	0.0604	0.0228	0.0354	0.1379	0.068	0.009
ZFP69	2001	AA	2.1	1	2.2	0	0.9686	0.544	0.0929	0.8616	0.8936	0.8999	0.8763	1	0.8583	0.9263	0.9165		0.8241	0.9304	0.951	1	1	0.9263	0.9341	1	0.9378	0.8817	1	0.8916	1	0.9263	1	1	0.9679	1	0.9596	1	1	1	0.7091		0.8458	0.8712	1	0.8624		0.862	1
EXO5	2003	RI	1.2	1.1	1.3	0	0.9284	0.7897	0.1786	1	0.6595	0.6336	0.6885	0.7056	0.7411	0.4639	1	1	0.7017	0.8622	0.5868	0.6049	1	1	0.7616		0.7998	0.7365	0.7455	0.4639	1	0.8312	0.7971	0.5451	0.9005	1	1	1	0.5309	1	0.7167	1	0.3746	0.7476	1	0.6888	0.6338	0.6893	0.2103
EXO5	2006	AD	1.2:1.3	1.1	1.5	0	0.9529	0.6364	0.1078	1	0.7842	1	1	0.7471	1	1	1	1	1	0.8784	0.8732	1	0.7612	1	0.8198	1	1	0.9183	0.5988	1	1	1	1	1	0.9256	1	1	1	1	0.7645	1	1	1	0.9158	1	1	1	0.9206	1
ZNF684	2008	AT	5.2			0	1	0.7471	0.1078	0.265	0.3075	0.2311	0.2973	0.3578	0.1836	0.2892	0.2914	0.3679	0.2167	0.3389	0.2342	0.2494	0.3378	0.3571	0.4125	0.4473	0.386	0.1512	0.5746	0.3399	0.3431	0.258	0.27	0.2122	0.285	0.2405	0.3043	0.1626	0.1641	0.152	0.1139	0.2601	0.2283	0.3599	0.2121	0.1634	0.1756	0.307	0.2485
ZNF684	2009	AT	6			0	1	0.7471	0.1078	0.735	0.6925	0.7689	0.7027	0.6422	0.8164	0.7108	0.7086	0.632	0.7833	0.6611	0.7658	0.7506	0.6622	0.6429	0.5875	0.5527	0.614	0.8488	0.4254	0.6601	0.6569	0.742	0.73	0.7878	0.715	0.7595	0.6957	0.8374	0.8359	0.848	0.8861	0.7399	0.7717	0.6401	0.7879	0.8366	0.8244	0.693	0.7515
NFYC	2012	AP	10			0	1	0.5291	0.0495	0.0488	0.0106	0.0139	0.0146	0.0199	0.0062	0.0169	0.0107	0.0176	0.0137	0.0164	0.0062	0.0054	0.0103	0.0036	0.0038	0	0.0019	0.0084	0.0189	0.0126	0.0093	0.0129	0.0107	0.005	0.0043	0.0201	0.0094	0.0041	0.0136	0.0024	0.0049	0.0167	0	0.004	0.0073	0.0124	0	0.0306	0.0086
NFYC	2013	AP	1			0	1	0.9128	0.1048	0.8928	0.9663	0.974	0.9011	0.972	0.9567	0.9631	0.9623	0.967	0.9722	0.9076	0.8901	0.9731	0.9321	0.8529	0.9915	0.9379	0.9771	0.902	0.8866	0.9202	0.9692	0.8983	0.9628	0.9704	0.9444	0.9662	0.9571	0.9807	0.8273	0.9712	0.9336	0.9185	0.9906	0.9731	0.9468	0.9582	0.7399	0.9404	0.9352
NFYC	2014	AP	2			0	1	0.0401	0.0072	0.0168	0	0.0048	0.0014	0.0046	0.0064	0	0.027	0	0.0102	0.0152	0.0043	0	0.0142	0	0.0026	0	0	0.0192	0.0217	0.0156	0.0038	0.0142	0.0055	0.0035	0.0013	0	0.0015	0.0086	0.0141	0	0	0.0069	0	0	0	0	0	0.0041	0.0071
NFYC	2015	AP	4			0	1	0.5092	0.0698	0.0416	0.0231	0.0073	0.0829	0.0035	0.0307	0.02	0	0.0154	0.0039	0.0608	0.0994	0.0215	0.0434	0.1435	0.002	0.0621	0.021	0.0704	0.0728	0.0516	0.0176	0.0746	0.021	0.0211	0.05	0.0136	0.032	0.0065	0.145	0.0264	0.0616	0.0579	0.0094	0.023	0.0459	0.0294	0.2601	0.0249	0.049
NFYC	2017	AA	20.1:20.2	19	20.3	0	0.9965	0.5583	0.0547	0.9765	0.9291	0.9177	0.9529	0.9319	0.9548	0.9715	0.9061	1	0.8822	0.9751	0.8416	0.9526	0.9342	0.9562	0.9374	0.9635	0.9296	0.8687	0.9504	0.8383	0.8557	0.9399	0.9582	0.957	0.8775	0.9528	0.9588	0.9302	0.8907	1	0.9342	0.9452	0.9632	0.9809	0.8932	0.8347	1	0.9402	0.928
NFYC	2018	AA	20.2	19	20.3	0	0.9948	0.2054	0.0284	0.9771	0.9606	0.9613	0.9687	0.9551	0.9789	0.9735	0.9626	1	0.9624	0.9818	0.9421	0.9783	0.9375	0.9819	0.957	0.9805	0.9605	0.9537	0.9711	0.9514	0.9236	0.9683	0.9789	0.982	0.9606	0.9508	0.9711	0.9728	0.9245	1	0.9617	0.9775	0.9854	0.9928	0.9627	0.913	1	0.9561	0.9577
NFYC	2019	AA	20.1	19	20.2	0	1	0.5249	0.0764	0.4871	0.3439	0.3044	0.3889	0.3852	0.3072	0.4746	0.2677	0.335	0.2219	0.4152	0.2413	0.3025	0.4799	0.2821	0.3962	0.3386	0.3459	0.2384	0.3571	0.2051	0.3235	0.3327	0.3249	0.2843	0.2226	0.5043	0.4026	0.2662	0.3934	0.4226	0.3548	0.2786	0.2739	0.2655	0.2401	0.3195	0.4473	0.4131	0.3568
NFYC	2020	ES	18	17	19	0	1	0.3128	0.0426	0.0707	0.0242	0.115	0.0888	0.1072	0.076	0.1266	0.0818	0.0718	0.0695	0.1164	0.0757	0.0861	0.1067	0.0212	0.0802	0.0523	0.1419	0.0947	0.0541	0.0999	0.0434	0.0523	0.2102	0.0685	0.0731	0.1057	0.0663	0.01	0.0874	0.0999	0.1111	0.0869	0.0271	0.0602	0.1195	0.1522	0.1228	0.0629	0.0889
NFYC	2021	AA	16.1	15	16.2	0	1	0.0458	0.0059	1	1	0.9939	0.9956	0.9941	0.9862	1	0.9837	1	0.9943	0.9938	0.9983	0.9924	1	0.99	0.9962	1	0.9897	0.9897	0.9966	0.9922	1	0.9889	1	1	0.9903	1	0.9915	0.9883	1	1	0.9838	1	1	1	1	1	1	1	0.9917
NFYC	2022	ES	13	12	14	0	1	0.0257	0.0031	1	1	1	1	1	1	1	1	1	1	1	1	1	1	0.9904	1	1	0.9969	1	1	1	1	1	1	1	1	1	1	0.9873	1	1	1	1	1	1	1	1	1	1	0.9936
NFYC	2023	ES	6	1	11	0	0.993	0.5967	0.0519	0.1059	0.0489	0.0443	0.0488	0	0	0.0572	0	0	0.0851	0.0613	0.0376	0.034	0.0504	0.0427	0.076	0.0106	0.0168	0.0949	0.033	0.05	0	0.0504	0.1269	0.0576	0.0577	0.013	0.0344	0.0308	0	0	0	0.015	0.0268	0.0306	0.024	0.0633	0.0732	0.0578	0.0202
CTPS1	2025	AP	2			0	0.986	0.6379	0.0436	0	0	0	0	0	0.0295	0	0	0	0	0	0	0	0	0	0.0162	0	0	0	0	0	0	0	0	0	0	0	0	0	0	0	0	0	0	0	0	0	0	0	0
CTPS1	2026	AP	1			0	0.986	0.6379	0.0759	0.9559	1	1	1	1	0.9705	0.936	0.9573	1	0.931	0.9838	1	1	1	0.9503	0.9634	1	1	1	0.916	1	1	0.918	0.8776	0.9637	1	1	0.9905	1	1	1	1	0.9149	1	0.8981	1	1	0.7952	1	1
CTPS1	2027	AP	3.1			0	0.986	0.5199	0.0643	0.0441	0	0	0	0	0	0.064	0.0427	0	0.069	0.0162	0	0	0	0.0497	0.0205	0	0	0	0.084	0	0	0.082	0.1224	0.0363	0	0	0.0095	0	0	0	0	0.0851	0	0.1019	0	0	0.2048	0	0
CTPS1	2028	AT	9.2			0	1	0.2864	0.021	0.0133	0	0.0038	0.0115	0	0	0.0043	0.0078	0.0194	0.0057	0.0073	0.0067	0.0049	0.0103	0	0.0052	0.012	0.0067	0.0136	0.0065	0.0256	0.0044	0.0094	0.0042	0.0197	0.0057	0.0143	0.0105	0.0058	0	0	0	0	0.0225	0.0128	0.0063	0.0029	0	0.0029	0.0108
CTPS1	2029	AT	20			0	1	0.2864	0.021	0.9867	1	0.9962	0.9885	1	1	0.9957	0.9922	0.9806	0.9943	0.9927	0.9933	0.9951	0.9897	1	0.9948	0.988	0.9933	0.9864	0.9935	0.9744	0.9956	0.9906	0.9958	0.9803	0.9943	0.9857	0.9895	0.9942	1	1	1	1	0.9775	0.9872	0.9937	0.9971	1	0.9971	0.9892
CTPS1	2030	ES	3.2:4:5:6	1	7	0	0.9983	0.0293	0.0018	1	1	1	1	1	1	1	1	1	1	1	1	1	1	1	1	1	1	1	1	1	1	1	1	1	1	1	1	1	1	1	1	1	1	1	1	1	1	1	1
SCMH1	2041	AP	1			0	0.9232	1	0.1663	0.7179	0.8238	0.7103	0.6126	0.973	0.8841	0.9141	0.7591	0.781	0.8071	0.925	0.9861	0.9749	0.9328	0.8927	0.838	0.8927	0.9569	0.8634	0.9475	0.7006	0.978	0.853	0.8776	0.7351	0.8951	0.6981	0.934		0.9258	0.8473	0.7762	0.7564	0.9615	0.9066	0.7014	0.8623		0.8254	1
SCMH1	2042	AP	4.1			0	0.9232	0.4452	0.0572	0	0.0311	0	0.072	0	0	0.0201	0.1041	0	0	0	0	0	0	0	0.0613	0	0	0.0296	0	0.0699	0	0.0445	0	0	0	0	0.025		0	0	0	0.0922	0	0	0	0		0.0754	0
SCMH1	2046	AP	3			0	0.9232	1	0.1402	0.2821	0.1451	0.2897	0.3154	0.027	0.1159	0.0659	0.1368	0.219	0.1929	0.075	0.0139	0.0251	0.0672	0.1073	0.1007	0.1073	0.0431	0.107	0.0525	0.2296	0.022	0.1025	0.1224	0.2649	0.1049	0.3019	0.0411		0.0742	0.1527	0.2238	0.1515	0.0385	0.0934	0.2986	0.1377		0.0992	0
SCMH1	2047	ES	17	16	18	0	0.9965	0.7538	0.0969	0.7139	0.6919	0.7822	0.7569	0.6111	0.8437	0.6792	0.7712	0.6038	0.585	0.7505	0.6689	0.6177	0.8276	0.6465	0.749	0.5882	0.7979	0.4697	0.637	0.7014	0.58	0.602	0.5751	0.6592	0.6667	0.7586	0.6991	0.8205	0.6729	0.6038	0.8372	0.4678	0.7904	0.704	0.6484	0.5474	0.7123	0.6847	0.6347
SCMH1	2048	ES	10:11:00	9	12	0	1	0.1903	0.0149	1	1	1	1	0.9777	0.99	0.9905	0.9906	0.9865	1	0.9907	0.9802	1	1	1	0.9824	1	1	0.9843	1	1	0.9597	0.9932	0.9756	1	0.9845	1	1	1	1	0.9687	1	1	1	1	1	1	1	1	0.968
SCMH1	2049	ES	07:08:00	6	9	0	0.9878	0.4492	0.0849	0.9034	0.8816	0.8749	0.9114	1	0.8767	0.8595	0.8456	0.851	0.8624	0.8529	0.9283	0.7388	0.8477	0.9274	0.6616	0.9334	0.8257	0.8411	0.8037	0.912	0.8343	0.9196	0.9751	0.8697	0.893	0.6485	0.8948	1	0.9156	1	0.7979	1	0.9172	0.8786	1	0.8778		0.9601	0.9054
SCMH1	2051	ES	7	6	8	0	0.9721	0.6795	0.109	0.8433	0.8379	0.7965	0.8831	0.8538	0.7273	0.772	0.9548	0.917	0.7778	0.9263	0.7631	0.8511	0.832	0.9219	0.8511	0.9114	0.7817	0.7921	1	0.8934	0.8627	0.7939	0.8865	0.9552	0.9808	0.6834	0.6871	1	0.8976	1	0.8786	0.7675	1	0.8635	0.8787	0.6942		0.9032	0.778
SCMH1	2053	ES	06:07:08	5	9	0	0.9878	0.6652	0.1289	0.8839	0.8491	0.9039	0.8929	0.8866	0.568	0.815	0.7961	0.8421	0.8864	0.809	0.8031	0.6307	0.8745	0.93	0.5885	0.8015	0.7744	0.7331	0.8533	0.9128	0.8478	0.73	0.8999	0.6496	0.7909	0.39	0.7871	0.7356	0.8036	0.6839	1	0.8837	1	0.8069	0.7928	1	1	0.8614	0.8882
SCMH1	2054	ES	06:08:00	5	9	0	0.8639	1	0.2026	0.7284	0.6862	0.8057	0.7113	0.7081	0.5096	0.7085	0.2564	0.5158	0.8339	0.4796	0.7303	0.4804	0.7513	0.7897	0.2749	0.5289	0.737	0.5849		0.7631	0.6353	0.654	0.7547	0.1908	0.1691	0.3417	0.8059	0.6318	0.4771			0.8591		0.5897	0.5098	1	1	0.6787	0.8054
SCMH1	2055	ES	8	5	9	0	0.7679	0.8903	0.1729	0.6666	0.7619		0.7123	0.686	0.2562	0.4124	0.5807	0.6251	0.838	0.3832	0.469	0.5124	0.6894	0.8759	0.4155	0.4968	0.5794	0.4718	0.6914	0.8865	0.7834	0.7228	0.6151	0.586	0.5662	0.4428	0.5949		0.7502	0.6679		0.8515		0.7199	0.4782			0.8302	0.8218
SCMH1	2057	ES	06:07:00	5	8	0	0.986	0.8	0.1465	0.8293	0.67	0.8589	0.7932	0.7904	0.8045	0.8753	0.7634	0.796	0.6356	0.8934	0.8183	0.6811	0.7657	0.6507	0.7004	0.8377	0.7486	0.79	0.7814	0.6144	0.6601	0.5789	0.8673	0.6308	0.7739	0.4816	0.7344	1	0.6364	0.5506	0.8738	0.5562	1	0.6351	0.8223	0.7506	0.3548	0.615	0.6537
SCMH1	2058	ES	6	5	8	0	0.8586	1	0.1987	0.6189	0.4331	0.7273	0.5243	0.5361	0.7614	0.79	0.2162	0.4276	0.5201	0.6358	0.7483	0.5215	0.5823	0.3442	0.375	0.5768	0.6995	0.6491		0.3216	0.3669	0.4759	0.684	0.17	0.1511	0.4223	0.7524		0.2703	0		0.5018		0.37	0.5501	0.6661	0.4564	0.3405	0.4913
FOXJ3	2063	AP	5.1			0	1	0	0	0	0	0	0	0	0	0	0	0	0	0	0	0	0	0	0	0	0	0	0	0	0	0	0	0	0	0	0	0	0	0	0	0	0	0	0	0	0	0	0
FOXJ3	2064	AP	2			0	1	0.8667	0.1804	0.3302	0.5124	0.6213	0.5388	0.5169	0.4837	0.4663	0.5139	0.5591	0.5198	0.6938	0.3251	0.2895	0.6352	0.7071	0.5148	0.6031	0.2947	0.5541	0.4962	0.4962	0.6284	0.4693	0.4926	0.3831	0.5502	0.5268	0.2961	0.4044	0.1767	0.424	0.5175	0.4206	0.4891	0.2538	0.8544	0.6253	0.2387	0.2669	0.4097
FOXJ3	2065	AP	14.1			0	1	0.971	0.1465	0.3311	0.1666	0.0485	0.1286	0.2928	0.0478	0.0472	0.0946	0.1206	0.0894	0.2003	0.1503	0.0083	0.1207	0.1343	0.1617	0.1577	0.1749	0.0961	0.1946	0.0688	0.1017	0.2363	0.2857	0.101	0.0996	0.0853	0.1522	0	0.0686	0.0475	0.0251	0.0314	0.1267	0.1344	0	0.1695	0.058	0.1574	0.0622
FOXJ3	2066	AP	3			0	1	0.269	0.0124	0	0	0	0.0703	0	0	0	0	0	0	0	0	0	0	0	0	0	0	0	0	0	0	0	0	0	0	0	0	0	0	0	0	0	0	0	0	0	0	0	0
FOXJ3	2067	AP	1			0	1	1	0.1793	0.3386	0.321	0.3302	0.2623	0.1903	0.4684	0.4865	0.3915	0.3203	0.3908	0.1059	0.5245	0.7023	0.2441	0.1585	0.3234	0.2392	0.5305	0.3498	0.3092	0.435	0.27	0.2944	0.2217	0.5159	0.3502	0.388	0.5516	0.5956	0.7547	0.5285	0.4574	0.548	0.3842	0.6118	0.1456	0.2052	0.7033	0.5757	0.5281
FOXJ3	2068	RI	14.3	14.2	14.4	0	0.9791	0.7544	0.0753	0.0229	0.0095	0.0035	0.0257	0.0044	0	0.0195	0.0108	0.0042	0.0111	0.0364	0.0159	0	0.0411	0.0074	0.0127	0.0227	0.0187	0.0126	0.0323	0.0116	0.0265	0.0193	0.0336	0.0115	0.0186	0.0111	0.0069	0.0094	0	0.0073	0	0.0049	0	0.0142	0	0		0.0108	0.0073
FOXJ3	2069	ES	10	9	11	0	0.9825	0.6333	0.095	0.8311	0.7134	0.7399	0.7015	0.8502	0.817	0.7942	0.8811	0.7399	0.7968	0.8104	0.8153	0.7448	0.6984	0.7711	0.733	0.8475	0.8576	0.7596	0.8557	0.6875	0.8224	0.8049	0.7196	0.8187	0.7602	0.826	0.6587	0.5264	1	0.8552	0.6875	0.9329	0.7643	0.6538	0.6809	0.9333	0.6984	0.909	0.7443
PPCS	2071	AP	1			0	0.9965	0.3481	0.0255	0.0109	0.0671	0.0092	0.0292	0.0205	0.0177	0.0244	0.0035	0.0434	0.0403	0.0117	0.02	0.0242	0.0083	0.0159	0.0344	0.0488	0.0175	0.1097	0.0318	0.0446	0.0213	0.0168	0.0502	0.0238	0.0566	0.0213	0.0452	0.0084	0.02	0.0208	0.0094	0.0119	0.0086	0.0292	0.0186	0.018	0.0326	0.0791	0.0271
PPCS	2072	AP	2.1			0	0.9965	0.3481	0.0255	0.9891	0.9329	0.9908	0.9708	0.9795	0.9823	0.9756	0.9965	0.9566	0.9597	0.9883	0.98	0.9758	0.9917	0.9841	0.9656	0.9512	0.9825	0.8903	0.9682	0.9554	0.9787	0.9832	0.9498	0.9762	0.9434	0.9787	0.9548	0.9916	0.98	0.9792	0.9906	0.9881	0.9914	0.9708	0.9814	0.982	0.9674	0.9209	0.9729
PPCS	2073	AT	4			0	1	0.1017	0.0135	0.976	0.9655	0.9806	0.959	0.9654	0.9769	0.9798	0.9817	0.9818	0.9207	0.9579	0.9821	0.9894	0.9588	0.9878	0.9887	0.986	0.9895	0.9787	0.9628	0.9654	0.9823	0.9721	0.9818	0.979	0.9641	0.9758	0.9764	0.9735	0.9848	0.9779	0.9747	0.981	0.9917	0.9799	0.9862	0.9688	0.9755	0.9669	0.982
PPCS	2074	AT	3.2			0	1	0.1017	0.0135	0.024	0.0345	0.0194	0.041	0.0346	0.0231	0.0202	0.0183	0.0182	0.0793	0.0421	0.0179	0.0106	0.0412	0.0122	0.0113	0.014	0.0104	0.0213	0.0372	0.0346	0.0177	0.0279	0.0182	0.021	0.0359	0.0242	0.0236	0.0265	0.0152	0.0221	0.0253	0.019	0.0083	0.0201	0.0138	0.0312	0.0245	0.0331	0.018
PPCS	2075	AD	2.2	2.1	3.1	0	1	0.6833	0.1053	0.5683	0.6176	0.5901	0.775	0.6625	0.5847	0.8213	0.7294	0.7861	0.8726	0.832	0.6107	0.6606	0.6808	0.5121	0.8403	0.6565	0.7593	0.8664	0.6243	0.5848	0.5624	0.6494	0.6789	0.7047	0.7729	0.6882	0.7782	0.6837	0.5382	0.681	0.4687	0.6011	0.7741	0.5983	0.6988	0.662	0.6503	0.7956	0.5847
CCDC30	2079	AP	1			0	0.8412	1	0.1637	0.7795	0.9108	1	0.8682	0.8626	1		0.9107	0.9217	0.846	0.9496	0.9008			1			0.8653	0.9179	0.5854	0.904	0.836	0.9485	0.6766	0.9401	0.92		0.8588		1	0.9217				0.674	0.8627		1	0.8626	0.6251
CCDC30	2080	AP	15			0	0.8412	0.5425	0.0819	0	0	0	0	0	0		0	0	0	0	0			0			0.1347	0	0	0	0	0	0	0	0		0		0	0				0.2479	0		0	0	0.0903
CCDC30	2081	AP	5.1			0	0.8412	1	0.1447	0.2205	0.0892	0	0.1318	0.1374	0		0.0893	0.0783	0.154	0.0504	0.0992			0			0	0.0821	0.4146	0.096	0.164	0.0515	0.3234	0.0599	0.08		0.1412		0	0.0783				0.0781	0.1373		0	0.1374	0.2846
CCDC30	2082	AP	10			0	0.8412	0.2446	0.0195	0	0	0	0	0	0		0	0	0	0	0			0			0	0	0	0	0	0	0	0	0		0		0	0				0	0		0	0	0
PPIH	2095	AP	3.1			0	1	0.1568	0.0099	0.0026	0.0022	0	0.0026	0	0.0007	0	0.0006	0.0063	0.0035	0.0005	0.0029	0.001	0	0.0089	0.0018	0	0.0022	0.003	0.0062	0.006	0	0.0034	0.0037	0	0.0008	0	0.0038	0	0	0	0.0008	0.0011	0.0028	0.005	0	0.0029	0	0.002	0
PPIH	2096	AP	1			0	1	0.3223	0.0288	0.9783	0.9816	0.9966	0.9821	1	0.9812	0.9694	0.9852	0.9937	0.9841	0.9868	0.9522	0.9726	0.8862	0.9911	0.9982	1	0.9887	0.9865	0.9828	0.9771	0.9626	0.9716	0.9754	0.9675	0.9844	0.9869	0.969	0.9767	0.9916	0.9829	0.9954	0.9786	0.9675	0.982	0.9883	0.9917	0.9202	0.9821	0.9796
PPIH	2097	AP	2.1			0	1	0.2914	0.0254	0.0191	0.0162	0.0034	0.0153	0	0.0181	0.0306	0.0142	0	0.0124	0.0127	0.0448	0.0264	0.1138	0	0	0	0.0091	0.0105	0.011	0.0169	0.0374	0.025	0.0209	0.0325	0.0148	0.0131	0.0272	0.0233	0.0084	0.0171	0.0039	0.0204	0.0297	0.0131	0.0117	0.0054	0.0798	0.016	0.0204
PPIH	2100	AT	10			0	1	0.7278	0.0675	0.9179	0.969	0.9871	0.9755	0.9625	0.9789	0.9854	0.9908	0.9311	0.9894	0.9637	0.9888	1	0.9482	0.9562	0.9716	0.9706	0.9844	0.9922	0.9598	0.9776	0.9788	0.972	0.972	0.9941	0.9809	0.9605	0.974	0.9884	0.9924	0.9976	0.995	0.9992	0.9982	0.9489	1	0.9903	0.9942	0.9928	0.9919
PPIH	2101	AT	9.2			0	1	0.7278	0.0675	0.0821	0.031	0.0129	0.0245	0.0375	0.0211	0.0146	0.0092	0.0689	0.0106	0.0363	0.0112	0	0.0518	0.0438	0.0284	0.0294	0.0156	0.0078	0.0402	0.0224	0.0212	0.028	0.028	0.0059	0.0191	0.0395	0.026	0.0116	0.0076	0.0024	0.005	0.0008	0.0018	0.0511	0	0.0097	0.0058	0.0072	0.0081
PPIH	2103	AD	3.3	3.2	4	0	0.9983	0.2983	0.025	0.0185	0.0152	0.014	0.0149	0.0262	0.0069	0.0068	0.0064	0.0099	0.034	0.0192	0.0195	0.0069	0.0196	0.0205	0.0167	0.0108	0.0113	0.016	0.0309	0.0203	0.0351	0.0218	0.0201	0.0061	0.0212	0.0127	0.015	0.021	0.0101	0.0094	0.0107	0.0082	0.0167	0.0284	0.0076	0.014	0.0656	0.0157	0.006
LEPRE1	2106	RI	14.3	14.2	14.4	0	0.9791	0.9749	0.1929	0.5738	0.3806	0.5669	0.3754	0.8395	0.2757	0.3414	0.4741	0.431	0.4045	0.5933	0.2239	0.1045	0.4066	0.2651	0.2463	0.2078	0.2801	0.3256	0.4424	0.3382	0.2651	0.4339	0.4863	0.1021	0.2353	1	0.4786	0.3107	0.4741	0.6187	0.3869	0.419	0.0348	0.5789	0.2108	0.233	0.1914	0.3768	0.464
LEPRE1	2107	RI	14.2:14.3	14.1	14.4	0	0.9965	0.6249	0.0873	0.2454	0.1449	0.0464	0.1425	0.1655	0.116	0.1272	0.1968	0.1479	0.0677	0.1889	0.0897	0.052	0.1484	0.1219	0.0668	0.056	0.1216	0.0792	0.1987	0.0986	0.0472	0.1682	0.1699	0.0373	0.0719	0.1592	0.1944	0.0674	0.1974	0.0397	0.1421	0.18	0.0137	0.2593	0.0517	0.1023	0.0839	0.1309	0.1012
LEPRE1	2108	AD	14.2	14.1	14.4	0	0.986	0.4806	0.0763	0.2914	0.3241	0.0708	0.2602	0.1051	0.3003	0.2747	0.2682	0.2386	0.1228	0.2201	0.292	0.3514	0.2503	0.3499	0.2572	0.2738	0.3057	0.1707	0.2686	0.28	0.1498	0.286	0.2089	0.3039	0.259	0.1301	0.2552	0.2152	0.2552	0.0377	0.2302	0.2662	0.283	0.3097	0.2601	0.3197	0.3458	0.2305	0.1667
C1orf50	2109	AT	5			0	1	0.2403	0.0398	0.0723	0	0.0224	0.0105	0.0311	0	0.0446	0.0568	0.0408	0.0082	0.0078	0.0109	0	0.1418	0.0292	0.0396	0	0.0437	0.0857	0	0.0508	0	0.0338	0.0107	0.0233	0.047	0.0432	0.0199	0	0	0	0	0	0	0	0	0	0.0299	0.016	0
C1orf50	2110	AT	4.3			0	1	0.3455	0.0513	0.9277	1	0.9776	0.9272	0.9689	0.9886	0.9554	0.9432	0.9592	0.9919	0.9807	0.981	1	0.8582	0.9275	0.9309	1	0.9563	0.8665	1	0.9492	1	0.9662	0.9733	0.9767	0.953	0.9568	0.9652	1	1	1	1	1	1	1	1	1	0.9701	0.984	1
C1orf50	2111	AT	8			0	1	0.1878	0.0238	0	0	0	0.0624	0	0.0114	0	0	0	0	0.0115	0.0081	0	0	0.0434	0.0295	0	0	0.0478	0	0	0	0	0.016	0	0	0	0.0148	0	0	0	0	0	0	0	0	0	0	0	0
C1orf50	2112	AA	2.1	1.3	2.2	0	0.9476	0.5828	0.0612	0.0829	0	0.0415	0.0624	0.0352	0	0	0.0187	0.1005	0.0089	0.0819	0	0.0402	0.1005	0.0445	0.0312	0	0.0312	0	0.0606	0.0708	0.0367	0.0409	0	0.0129	0.1097	0.0653	0.0461	0.1344	0.0546	0.0606	0.0375	0.0228	0.0498	0.0746	0.0448	0.0365	0	0	0.0483
C1orf50	2115	ES	1.2:1.3:2.2	1.1	3	0	0.8569	0.4394	0.0931	1	1		0.9186	1	0.8674	1	0.8902	1	0.946	0.8666	0.9005	1	1		1	1	1	0.7047	1	1	1	1	0.8507	1	1	1	1	1	0.8062	1	0.9049	0.8342	1	1	1	1		1	1
C1orf50	2116	ES	1.3:2.2	1.1	3	0	0.9878	0.2094	0.0175	1	1	1	0.9896	1	0.9918	1	0.9877	1	0.9931	0.9777	0.9903	1	1	1	1	1	1	0.9635	1	1	1	1	0.9777	1	1	1	1	1	0.9807	1	0.9841	0.986	1	1	1	1	1	1	1
C1orf50	2117	RI	1.2	1.1	1.3	0	0.8237	0.7014	0.1102	0.1274	0.0858	0	0.1459	0.0787	0.0692	0.1345	0.136	0.176	0.1435	0.1716	0.1171	0.0488	0.1246	0.0507	0.0742	0.1381	0.1178	0.1246	0.0539		0.0825	0.1211	0.176	0.1189	0.0817		0.0812	0.1626	0.1011	0.0913	0.1836	0.0897	0.0787	0.0701	0.0464	0.122		0.0374	0.1596
CCDC23	2118	AP	2			0	0.9965	0.2664	0.0366	0	0.0252	0.0322	0.1187	0.0715	0.0397	0.0244	0.0452	0.0539	0.0405	0.1264	0.087	0.0344	0.1474	0	0.0333	0.0626	0.0849	0.1007	0.0337	0.0275	0.0699	0.0436	0.2518	0.0389	0.0888	0	0.0429	0	0.0085	0.0242	0.0366	0	0	0.0373	0.0972	0.1126	0.0281	0.0108	0.0142
CCDC23	2119	AP	1			0	0.9965	0.2664	0.0366	1	0.9748	0.9678	0.8813	0.9285	0.9603	0.9756	0.9548	0.9461	0.9595	0.8736	0.913	0.9656	0.8526	1	0.9667	0.9374	0.9151	0.8993	0.9663	0.9725	0.9301	0.9564	0.7482	0.9611	0.9112	1	0.9571	1	0.9915	0.9758	0.9634	1	1	0.9627	0.9028	0.8874	0.9719	0.9892	0.9858
CCDC23	2120	RI	4.2	4.1	4.3	0	1	0.0713	0.007	1	1	0.9952	1	0.9911	0.9962	1	0.995	1	0.9977	1	0.998	0.9965	1	1	1	0.9904	0.9951	0.9978	1	1	1	1	1	0.9925	0.9943	1	0.9953	1	0.9922	1	0.9969	0.9921	0.9902	0.9975	1	0.9965	0.9957	1	1
ERMAP	2121	AP	2.1			0	0.986	0.5595	0.0577	0	0	0	0.0651	0.0277	0.0198	0	0.0345	0	0	0	0.0412	0.0219	0.0767	0	0	0	0	0.0472	0.1237	0.0634	0.0691	0.0122	0.1144	0	0	0	0.0529	0	0	0	0.065	0	0	0.0143	0	0	0	0	0.0307
ERMAP	2122	AP	3.1			0	0.986	1	0.1722	0.2887	0.1206	0.0626	0.1419	0.4038	0.6114	0.0608	0.1481	0.1627	0.1291	0.1614	0.1925	0.0082	0.1862	0.3778	0.1891	0.0649	0.0514	0.1058	0.2156	0.0829	0.0903	0.1187	0.2991	0.0688	0.0905	0.1186	0.1334	0	0.1555	0.0885	0.0607	0.0258	0.0463	0.3647	0.0354	0.1022	0.1627	0.1008	0.0632
ERMAP	2123	AP	1			0	0.986	1	0.188	0.7113	0.8794	0.9374	0.793	0.5684	0.3687	0.9392	0.8174	0.8373	0.8709	0.8386	0.7662	0.9699	0.7371	0.6222	0.8109	0.9351	0.9486	0.847	0.6606	0.8536	0.8407	0.8691	0.5865	0.9312	0.9095	0.8814	0.8137	1	0.8445	0.9115	0.8743	0.9742	0.9537	0.6211	0.9646	0.8978	0.8373	0.8992	0.9061
ERMAP	2124	RI	3.3	3.2	3.4	0	0.8534	1	0.2003	0.1928	0.0449		0.1837	0.4143	0.5439		0.1915	0.0724	0.0864	0.1489	0.1658	0	0.0724	0.2146	0.2504	0.2546	0.064	0.1011	0.0943	0.1974	0.0835	0.1202		0.1475	0.0665	0.0518	0.1239	0.0295	0.033	0.0487		0.033		0.4251	0	0.198		0.0495	0
ZNF691	2131	AD	2.2:2.3	2.1	4	0	0.9093	0.9364	0.2008	0.7717	0.5449	0.4422	0.8848	0.858	0.5538	1	0.5865	1	0.6549	0.708	0.662	0.0636	0.6245	0.8919	0.6384	1	0.2474	0.3376	0.6076	0.6651	0.2255	0.6252	1	0.3528	0.8481	1	0.5988	0.1542		0.826	0.5649	0.4317	0.8458	0.6278		0.3445		0.3993	0.407
ZNF691	2132	ES	2.3	2.1	4	0	0.7853	0.829	0.1887	0.7156	0.653	0.6603	0.9145	0.9203	0.8272	1	0.9017	1	0.8764	0.8369	0.8331	0.4878	0.6693		0.6624	1	0.6639	0.6406	0.513	0.818	0.366	0.2837	1	0.5887	0.9027		0.7309	0.546			0.5468			0.6633	0.7376	0.6376	0.8152	0.5076	0.4937
ZNF691	2135	ES	2.1:2.2:2.3	1	4	0	0.9494	1	0.2208	0.4266	0.2704	0.2765	0.373	0.4484	0.1152	0.4262	0.0434	0.8792	0.1066	0.3251	0.4937	0.0284	0.3667	0.6597	0.3707		0.0772	0.1615	0.5034	0.4315	0.1237	0.3264	0.4531	0.1619	0.4564	0.5554	0.3907	0.097	0.0317	0.2658	0.3625	0.4131	0.5659	0.4199		0.1341		0.1106	0.2106
ZNF691	2136	ES	2.1:2.3	1	4	0	0.8813	1	0.1925	0.4606	0.4086	0.4459	0.5191	0.6485	0.4574	0.4606	0.3759	0.8798	0.3267	0.532	0.6876	0.4602	0.5454		0.3828	0.7304	0.5206	0.3776	0.3956	0.6624	0.1882	0.143	0.6375	0.4604	0.6093		0.6038	0.5328	0	0	0.5024			0.5322	0.5628	0.4017	0.6534	0.2258	0.2536
ZNF691	2137	ES	2.1	1	4	0	0.8098	0.8886	0.1946	0.3383	0.4021	0.3823	0.1164	0.2114	0.2286		0.0976		0.0856	0.3076	0.4435	0.5939	0.4169	0.3714	0.3521		0.4548	0.3194	0.4231	0.3714	0.4305	0.3304		0.4528	0.206		0.4043	0.5387	0.3625	0.2336	0.605	0.6473	0.4219	0.4537	0.3674	0.3011	0.5558	0.3032	0.3167
SLC2A1	2138	AT	7			0	1	0.1435	0.0116	0.0378	0.0139	0.006	0.0046	0.01	0.0019	0	0.0031	0.0045	0.0057	0.0097	0.0037	0.0015	0.01	0	0.0029	0	0.0073	0.0024	0.0133	0.0019	0.0022	0.0069	0.0019	0.0031	0.0035	0.0055	0.0047	0.0116	0.0058	0.0029	0.0014	0.0034	0	0.0157	0.0009	0.0002	0.0017	0.0004	0
SLC2A1	2139	AT	4.3			0	1	0.0977	0.01	0.0239	0.0033	0.0057	0.0028	0.0032	0	0	0.0024	0	0.0018	0.0042	0.0028	0.0003	0.0126	0	0.0033	0.0225	0.0057	0.0025	0.014	0.0012	0.0056	0.0058	0.0018	0.0059	0.0052	0	0.0014	0.0146	0.0036	0.0037	0.0085	0.0012	0	0	0.0014	0	0.0011	0.0011	0.0057
SLC2A1	2140	AT	11			0	1	0.2247	0.0194	0.9384	0.9828	0.9883	0.9926	0.9868	0.9981	1	0.9945	0.9955	0.9924	0.9861	0.9935	0.9981	0.9773	1	0.9937	0.9775	0.9871	0.9952	0.9727	0.9969	0.9922	0.9873	0.9962	0.9909	0.9913	0.9945	0.9939	0.9739	0.9906	0.9934	0.9901	0.9954	1	0.9843	0.9978	0.9998	0.9972	0.9984	0.9943
FAM183A	2141	AP	1			0	0.7993	1	0.2789	0.0124	0.2388	0.1339	0.7274				0.019	0.5799	0.887	0	0.4094	0.0068	0.0855	0.0254			0.2056	0.6777	0.611	0.0675		0.1098		0.0175	0.879	0.2056	0.0091	0.9099	0.1316	0.5799	0.4279	0		0	0.2719		0.2481	0	0.0109
FAM183A	2142	AP	2.1			0	0.7993	1	0.2789	0.9876	0.7612	0.8661	0.2726				0.981	0.4201	0.113	1	0.5906	0.9932	0.9145	0.9746			0.7944	0.3223	0.389	0.9325		0.8902		0.9825	0.121	0.7944	0.9909	0.0901	0.8684	0.4201	0.5721	1		1	0.7281		0.7519	1	0.9891
EBNA1BP2	2145	AP	2.1			0	0.9948	0.4168	0.0498	0.9812	0.9319	0.9697	0.9453	0.953	0.9816	1	0.9871	0.9309	0.9947	0.9792	0.9408	0.9756	0.97	0.9699	0.9784	0.9935	0.9748	0.9819	0.9592	0.9106	0.9904	0.9624	0.9667	0.8928	0.9571	0.9886	0.9597	0.9881	0.9777	0.971	0.9722	0.9731	0.9743	0.9616	0.973	0.9959	0.9767	0.9934	0.9385
EBNA1BP2	2146	AP	1			0	0.9948	0.4168	0.0498	0.0188	0.0681	0.0303	0.0547	0.047	0.0184	0	0.0129	0.0691	0.0053	0.0208	0.0592	0.0244	0.03	0.0301	0.0216	0.0065	0.0252	0.0181	0.0408	0.0894	0.0096	0.0376	0.0333	0.1072	0.0429	0.0114	0.0403	0.0119	0.0223	0.029	0.0278	0.0269	0.0257	0.0384	0.027	0.0041	0.0233	0.0066	0.0615
WDR65	2147	AT	12.3			0	0.8325	0.7766	0.0644	0.0448	0.0169	0	0		0.1283				0	0	0.0128	0	0.0237	0		0	0.1368		0.0418	0.0104		0		0.0127	0	0	0.0077		0	0		0.1283	0	0	0.0313				0.006
WDR65	2148	AT	24			0	0.8325	0.7766	0.0644	0.9552	0.9831	1	1		0.8717				1	1	0.9872	1	0.9763	1		1	0.8632		0.9582	0.9896		1		0.9873	1	1	0.9923		1	1		0.8717	1	1	0.9687				0.994
TMEM125	2153	AA	2.1	1	2.2	0	0.9651	0.9357	0.1332	0.2022	0.2407	0.271	0.2945	0.2337	0.2006	0.3165	0.6061	0.3931	0.2165	0.3895	0.3112	0.2992	0.2337	0.2614	0.464	0.3098	0.6839	0.3319	0.309	0.3327	0.1649	0.3059	0.4467	0.2789	0.389	0.2828	0.1854	0.3386	0.1572	0.2248	0.1621	0.457	0.2114	0.2492	0.3418	0.3448	0.4449	0.2247	0.204
C1orf210	2154	AD	1.2	1.1	2	0	0.986	0.2612	0.0415	1	0.9615	0.9542	1	0.9434	0.9804	1	0.9283	0.9029	0.9604	0.9906	0.9494	0.96	0.8836	0.9559		0.9657	0.9693	0.9695	0.9397	0.958	0.9662	0.9684	0.9516	0.967	1	0.944	1	0.8856	0.976	0.9861	0.9327	0.9688	0.9777	0.9669	0.9144	0.974	0.8531	0.989	0.906
TIE1	2158	AT	8			0	1	0.2747	0.0177	0.0387	0.0308	0	0.0185	0.0188	0	0	0	0	0	0.0071	0	0	0	0	0	0.008	0.009	0.0091	0.0181	0.0107	0	0.0086	0	0.0049	0.0093	0	0	0	0	0	0	0	0	0	0	0	0	0	0
TIE1	2159	AT	24			0	1	0.2747	0.0177	0.9613	0.9692	1	0.9815	0.9812	1	1	1	1	1	0.9929	1	1	1	1	1	0.992	0.991	0.9909	0.9819	0.9893	1	0.9914	1	0.9951	0.9907	1	1	1	1	1	1	1	1	1	1	1	1	1	1
TIE1	2160	ES	07:09:00	6	10	0	0.9878	0.1223	0.0106	1	1	0.9816	0.9845	1	1	1	1	1	1	1	1	1	1	0.9242	1	1	1	1	1	0.9826	1	0.9803	1	1	1	1	1	1	1	1	1	1	1	1	1	1	1	1	1
TIE1	2162	ES	7	6	9	0	0.9825	0.4287	0.0779	0.9107	0.8673	0.6949	0.8247	0.7868	0.8755	0.8098	0.9191	0.7811	0.8341	0.7878	0.908	0.876	0.953	0.9068	0.9555	0.7808	0.878	0.8893	0.8301	0.7534	0.8588	0.7267	0.8295	0.9172	0.7012	0.9068	0.9056	0.9191	0.8949	0.8083	1	0.8022	0.7355	0.6622	0.8208	0.6755	0.7087	0.9501	0.9166
CDC20	2165	AP	2.1			0	0.7871	0.795	0.0846	0.1091	0.1639	0.1301	0.1544	0.2254	0.1052	0.2112	0.1151	0.2122	0.1274	0.0965	0.0898	0.2326	0.459	0.2795	0.0742	0.3038	0.0946	0.1411	0.2197	0.1305	0.3115	0.0511	0.1081	0.1106	0.1967	0.1217	0.1197	0.1951		0.1538	0.271	0.1951	0.1391	0.2326	0.1493	0.2063	0.1081	0.0985
CDC20	2166	AP	1			0	0.7871	0.795	0.0846	0.8909	0.8361	0.8699	0.8456	0.7746	0.8948	0.7888	0.8849	0.7878	0.8726	0.9035	0.9102	0.7674	0.541	0.7205	0.9258	0.6962	0.9054	0.8589	0.7803	0.8695	0.6885	0.9489	0.8919	0.8894	0.8033	0.8783	0.8803	0.8049		0.8462	0.729	0.8049	0.8609	0.7674	0.8507	0.7937	0.8919	0.9015
ELOVL1	2167	ES	4	3	5	0	1	0.1072	0.0055	0.9983	0.9985	1	0.9899	1	0.9967	0.9933	0.9973	1	0.9978	0.9986	1	1	1	1	0.9976	1	1	0.9989	1	0.9952	1	1	1	0.9988	0.9909	1	0.9992	1	1	0.995	1	1	1	0.9962	0.9951	0.9987	1	0.9951	1
MED8	2170	RI	7.2	7.1	7.3	0	1	0.1262	0.0213	0.9794	0.9791	0.9773	0.976	0.9065	0.9621	0.9709	0.9656	0.9928	0.9218	0.9675	0.9659	0.9106	0.9824	0.9606	0.9418	0.9787	0.9534	0.9504	0.9558	0.9893	0.9655	0.9568	0.9664	0.9541	0.972	0.9189	0.9562	0.959	0.9535	1	0.9902	0.9804	0.9741	0.9138	0.986	0.9858	0.9903	0.9622	0.9161
MED8	2171	AA	3.1	2.2	3.2	0	1	0.0519	0.0087	0.9893	1	0.995	0.9927	0.984	1	0.9667	0.9965	1	0.9875	1	1	1	1	1	0.9786	0.9872	0.9865	1	0.9845	0.9897	0.9776	1	1	0.9872	0.9835	0.9835	0.9969	0.9897	0.9851	1	0.9941	0.9921	1	0.9958	0.9909	0.9906	1	0.9918	0.9926
MED8	2172	AA	2.1	1	2.2	0	0.9965	0.6116	0.0567	0.0902	0.1147	0.0773	0.1151	0.0585	0.1089	0.0469	0.0466	0.1003	0.0432	0.077	0.1363	0.0616	0.0187	0.099	0.0668	0.0688	0.0989	0.1444	0.1042	0.0655	0.0351	0.067	0.0788	0.0952	0.1029	0	0.0641	0.1208	0.1304	0.0396	0.0751	0.0948	0.0419	0.1126	0.0632	0.1054	0.1768	0.0871	0.0598
SZT2	2175	AT	7			0	1	0.4878	0.0641	0.163	0.1651	0.1747	0.1993	0.1702	0.248	0.2781	0.1205	0.2274	0.2173	0.1636	0.1173	0.288	0.1505	0.2188	0.1685	0.1833	0.2021	0.1712	0.3238	0.1757	0.255	0.111	0.1187	0.1472	0.2353	0.1844	0.1774	0.4207	0.2655	0.2214	0.2568	0.1678	0.1192	0.1904	0.2847	0.1918	0.2232	0.0944	0.1503
SZT2	2176	AT	5			0	1	0.4882	0.0596	0.15	0.1521	0.2074	0.0828	0.1413	0.0971	0.1138	0.1371	0.1798	0.0853	0.103	0.1189	0.1982	0.1454	0.1449	0.1113	0.0743	0.1412	0.1961	0.1255	0.2616	0.1385	0.1138	0.1915	0.2114	0.0835	0.1668	0.1279	0.1997	0.1501	0.1477	0.2405	0.1841	0.1364	0.2046	0.3746	0.2178	0.1685	0.2816	0.1329
SZT2	2177	AT	74			0	1	0.7267	0.0981	0.687	0.6828	0.6179	0.718	0.6885	0.6549	0.6081	0.7424	0.5928	0.6974	0.7334	0.7638	0.5137	0.7041	0.6363	0.7202	0.7424	0.6567	0.6327	0.5507	0.5627	0.6065	0.7752	0.6898	0.6413	0.6812	0.6488	0.6947	0.3796	0.5844	0.6309	0.5027	0.6482	0.7444	0.6051	0.3407	0.5904	0.6083	0.6239	0.7168
HYI	2181	AT	8.3			0	0.9965	0.2686	0.0433	0.1045	0.05	0.0084	0.0767	0.062	0.0748	0.0569	0.0442	0.0259	0.0511	0.0943	0.0581	0.028	0.1779	0.0637	0.1557	0.0196	0.0651	0.0413	0.0371	0.1014	0.027	0.0199	0.0969	0.0545	0.0829	0.0987	0.0553	0	0	0.0135	0.0158	0.0404	0.0818	0.0389	0.0038	0.012	0.0286	0.0318	0.0173
HYI	2182	AT	9			0	0.9965	0.2686	0.0433	0.8955	0.95	0.9916	0.9233	0.938	0.9252	0.9431	0.9558	0.9741	0.9489	0.9057	0.9419	0.972	0.8221	0.9363	0.8443	0.9804	0.9349	0.9587	0.9629	0.8986	0.973	0.9801	0.9031	0.9455	0.9171	0.9013	0.9447	1	1	0.9865	0.9842	0.9596	0.9182	0.9611	0.9962	0.988	0.9714	0.9682	0.9827
HYI	2183	AD	8.2	8.1	9	0	0.9948	0.7522	0.09	0.2699	0.3876	0.4405	0.2747	0.3292	0.2227	0.2787	0.3448	0.2637	0.3036	0.3599	0.2986	0.3047	0.3166	0.3142	0.351	0.4162	0.3025	0.3923	0.296	0.3282	0.4885	0.3512	0.4653	0.4007	0.298	0.3048	0.3017	0.1107	0.3495	0.3609	0.3524	0.4863	0.2277	0.2899	0.2447	0.3242	0.3518	0.4928	0.3591
HYI	2184	ES	3	2.1	4	1	0.8953	0.5385	0.1012	0.7814	0.727	0.5386	0.7443	0.803	0.8281	0.6617	0.6934	0.8014	0.6853	0.8202	0.7784	0.7164		0.7354	0.6837	0.5627	0.8323	0.6723	0.8313	0.4809	0.5767	0.7522	0.9195	0.531	0.6984		0.8569	0.4426	0.7993	0.6261	0.5226	0.8187	0.6136	0.8405	0.5677	0.5106		0.7438	0.7086
HYI	2185	AD	2.2	2.1	4	1	0.8953	0.3041	0.0465	0.8967	0.8411	0.8823	0.8788	0.9003	0.961	0.8718	0.8639	0.895	0.67	0.8744	0.9403	0.9156		0.8884	0.8314	0.8675	0.9302	0.9113	0.8946	0.8246	0.7453	0.9238	0.9377	0.8155	0.8924		0.9283	0.7063	0.9227	0.8301	0.8553	0.9117	0.8596	0.9586	0.9202	0.8585		0.8877	0.9531
PTPRF	2186	AP	1			0	0.9511	0	0	1	1	1	1	1	1	1	1	1	1	1	1	1	1	1	1	1	1	1	1	1	1	1	1	1	1	1	1	1	1	1	1	1	1	1	1	1	1	1	1
PTPRF	2188	AP	3.1			0	0.9511	0	0	0	0	0	0	0	0	0	0	0	0	0	0	0	0	0	0	0	0	0	0	0	0	0	0	0	0	0	0	0	0	0	0	0	0	0	0	0	0	0	0
PTPRF	2189	ES	23	22	24	0	0.9983	0.1301	0.0183	0.0131	0.007	0	0.0076	0.0118	0.0131	0.0091	0.0069	0.0183	0.0016	0.006	0.0085	0.0135	0.015	0.0059	0.0116	0.0204	0.0413	0.0028	0.0158	0.0715	0.0165	0.0144	0.0105	0.0095	0.0031	0.0077	0.0038	0	0.0174	0.0037	0.0106	0.0177	0	0.0302	0	0.0047	0	0.0172	0.0291
PTPRF	2190	ES	14	13	15	0	0.9878	0.9619	0.143	0.2162	0.2229	0.4043	0.4839	0.2428	0.3553	0.1394	0.2102	0.1453	0.132	0.1676	0.3635	0.2266	0.3971	0.1839	0.0468	0.4021	0.1703	0.1016	0.1465	0.7726	0.2742	0.127	0.5104	0.4579	0.0973	0.19	0.1256	0.2767	0.1576	0.1747	0.1053	0.3365	0.4787	0.1893	0.436	0.3689	0.9619	0.2423	0.208
PTPRF	2191	ES	12	11	13	0	1	0.3009	0.0195	0.9969	1	1	0.978	0.9946	0.9943	1	0.9916	0.9955	0.9942	1	0.9932	1	1	0.9913	0.9809	0.9743	0.989	1	1	0.9875	1	0.9969	0.9957	0.9969	0.9033	1	0.9901	1	1	0.9884	1	1	1	1	1	1	1	0.9965	0.9838
ST3GAL3	2195	AT	21			0	1	0.3332	0.0394	0.9637	0.9719	1	0.9782	0.9561	0.9793	1	0.9881	0.961	0.9851	0.9764	0.9797	0.9943	0.9315	0.972	0.9773	0.9878	0.982	0.9913	0.9865	0.9906	0.9937	0.994	0.9915	0.9893	0.9868	0.9817	0.9497	1	0.9794	0.9777	0.9926	1	1	0.9952	1	0.9933	1	0.9754	0.9913
ST3GAL3	2197	AT	18			0	1	0.3332	0.0394	0.0363	0.0281	0	0.0218	0.0439	0.0207	0	0.0119	0.039	0.0149	0.0236	0.0203	0.0057	0.0685	0.028	0.0227	0.0122	0.018	0.0087	0.0135	0.0094	0.0063	0.006	0.0085	0.0107	0.0132	0.0183	0.0503	0	0.0206	0.0223	0.0074	0	0	0.0048	0	0.0067	0	0.0246	0.0087
ST3GAL3	2198	AA	19.1	16.2	19.2	0	0.9948	0.0918	0.0062	1	1	1	1	1	1	1	1	1	0.9816	1	1	1	1	1	1	1	1	1	1	1	1	1	1	1	1	1	1	1	1	1	1	1	1	1	1	1	1	1	1
ST3GAL3	2199	ES	19.1:19.2:20	16.2	21	0	0.9983	0.1978	0.0239	1	1	1	0.9809	1	0.9882	1	1	1	1	0.9788	0.9604	1	1	1	0.9802	1	0.9677	0.9924	1	1	0.9584	0.9632	1	0.9866	0.9648	0.9439	0.9773	1	1	0.9792	1	1	0.8685	1	1	1	1	0.9897	0.9901
ST3GAL3	2201	ES	16.1:16.2:19.1:19.2:20	15.1	21	0	0.7574	0.6336	0.1055	1		1	1	1	1	1		1	0.8899	1	0.9117	1	1	0.8495	0.5413	0.8794	1	1	0.9141	1	1			1	0.9375		1		1	0.6999	1	1		1	1	1	1	1	0.7533
ST3GAL3	2202	ES	16.2:19.1:19.2:20	15.1	21	0	0.9983	0.0899	0.0114	1	1	1	1	1	1	1	1	1	0.9953	1	0.9905	1	1	0.9782	0.9792	0.9634	1	1	0.9817	1	1	1	1	1	0.9918	1	1	1	1	0.9773	1	1	1	1	1	1	1	1	0.9787
ST3GAL3	2210	ES	16.2	15.1	19.1	0	0.9948	0.1959	0.0187	1	1	1	1	1	1	1	1	1	0.9937	1	1	0.9576	1	1	1	1	1	1	0.9746	1	1	1	1	1	0.9669	1	1	1	0.9198	1	1	1	1	1	1	1	1	0.957	1
ST3GAL3	2211	AA	16.1	15.1	16.2	0	0.8866	0.5946	0.0737	0.0984	0	0.1292	0.0534	0.1122	0.0859	0.0753	0	0.0991	0.0388	0.1436	0.0948	0.1014	0.1667	0.1176	0.0255	0.2219	0.1358	0.0776	0.171	0.1803	0.1549	0	0.0391	0.084	0.1161		0.0717	0.0948	0.0534	0.0534	0.1429		0	0.0345	0.0288	0.0358	0.2105	0.0587	0.0659
ST3GAL3	2213	ES	14:15.1:16.2:19.1:19.2:20	13	21	0	0.9983	0.3417	0.0186	1	1	1	0.9797	1	1	1	0.9773	1	0.9955	1	0.9906	1	1	1	1	0.9623	0.8977	1	1	1	1	0.9876	1	1	0.9926	1	0.9876	1	1	1	1	1	1	1	1	1	1	1	1
ST3GAL3	2223	ES	14:15.1:16.2	13	19.1	0	0.9965	0.1572	0.0099	1	1	1	1	1	1	1	0.9733	1	1	1	1	1	1	1	1	0.9571	1	1	0.9818	1	1	1	1	1	1	1	1	1	1	1	1	1	1	1	0.9739	1	1	1	0.9869
ST3GAL3	2232	ES	10:13:14:15.1:16.2:19.1:19.2:20	9	21	0	0.9651	0.5183	0.0242	1	1	1	1	1	1	1	1	1	1	1	1	1	1	1	1	1	1	1	1	1	1	1	1	1	0.9638	1	1	1	1	1	1	1	1	1	1	1	1	1	1
ST3GAL3	2233	ES	13:14:15.1:16.2:19.1:19.2:20	9	21	0	0.9948	0.0833	0.0042	1	1	1	1	1	1	1	1	1	1	1	1	1	1	1	1	1	1	1	1	1	1	1	1	1	0.989	1	1	1	1	1	1	1	1	1	1	1	1	1	1
ST3GAL3	2271	ES	11:12:00	9	13	0	0.9127	0.7454	0.0706	0.0393	0.0252	0	0.0549	0	0.0101	0.0342	0.0592	0.0931	0.0149	0.0595	0.0089	0	0.0272	0.0422	0.0125	0.0632	0.0228	0.0209	0.0166	0.0305	0	0.0147	0.1445	0	0		0	0.0206	0	0	0.0217	0.0206	0.0117	0	0.0098	0.0837	0.0155	0.0051	0.0085
ST3GAL3	2272	ES	12	9	13	0	0.925	0.6692	0.1031	0.0797	0.0392	0	0.0967	0.2448	0.1569	0.0595	0	0.1548	0.1411	0.1346	0.1652	0.0349	0.2512	0.1627	0.1117	0.1262	0.0479	0.2302	0.2411	0.0532	0.1941	0.0259	0	0.0958	0.2062	0.0879	0.2896	0.0361	0.1594	0.1443	0.0869	0.0361	0.0206	0.1115	0.0279	0	0.0273	0.0104	0.0729
ST3GAL3	2273	ES	10	9	13	0	0.9773	0.8389	0.1192	0.2947	0.0916	0.1291	0.1438	0.2213	0.183	0.2742	0.3224	0.1274	0.1493	0.1562	0.1971	0.1071	0.2646	0.0876	0.086	0.2088	0.1548	0.2354	0.1119	0.1573	0.2514	0.0862	0.2096	0.1808	0.2615	0.161	0.0657	0.1299	0.1589	0.1155	0.2419	0.0695	0.0775	0.0986	0.1215	0.4168	0.2012	0.0806	0.0268
ST3GAL3	2296	ES	9	6	13	0	0.9773	0.1198	0.0116	0.9681	1	1	1	1	1	1	1	1	1	0.9653	1	1	0.9479	1	1	1	1	1	1	1	1	1	1	1	1	1	1	1	1	1	1	0.9136	1	1	1	1	1	1	1
ST3GAL3	2297	ES	7.1:7.2:8	6	9	0	0.7993	0.5991	0.0415	0.0314	0.0072	0	0.0077	0.0534	0	0.0245	0		0.004	0	0.0028	0		0.0245	0.0045	0	0	0.0034	0	0.008	0	0.0041	0.0362	0.0093	0.0425	0.0606	0.0068	0.1364	0	0.0066	0			0.0027	0.0486	0.0713		0	0.0026
ST3GAL3	2298	ES	7.2:8	6	9	0	0.7714	0.1619	0.0135	0	0.0097	0	0.012	0	0	0	0		0.0063	0	0.0038	0		0.0327	0.0061	0	0	0.0046	0	0.0108	0	0.0055	0	0.0125	0		0.0091		0	0.0089	0			0.0036	0	0		0	0.0035
ST3GAL3	2299	ES	7.1:7.2	6	9	0	0.8848	0.5634	0.1014	0.0293	0.2407	0.2849	0.2458	0.0502	0.0931	0.0376	0.3625	0.3922	0.1086	0.1535	0.1367	0.1935		0.3008	0.2828	0.0602	0.2722	0.183	0.1279	0.1117	0.1497	0.0768	0.0554	0.1803	0.0777	0.0914	0.183		0.1497	0.1571	0.1379			0.1732	0.0734	0.1567		0.0819	0.1584
ST3GAL3	2300	ES	7.2	6	9	0	0.7714	0.0735	0.0062	0	0	0	0	0	0	0	0		0	0	0	0		0	0	0	0	0	0	0	0	0	0	0	0		0		0	0	0			0	0	0		0	0
ST3GAL3	2464	ES	04:06:09	3.1	13	0	0.9738	0.056	0.0024	1	1	1	1	1	1	1	1	1	1	1	1	1	1	0.944	1	1	1	1	1	1	1	1	1	1	1	1	1	1	1	1	1	1	1	1	1	1	1	1	1
ST3GAL3	2480	ES	4	3.1	6	0	0.9093	0.4811	0.0807	0.8936	0.8457	0.9407	0.8872	1	0.9273	1	0.8859	0.933	0.9231	0.834	0.8401	0.8537	1	0.8661	0.9411	1	0.8798	0.8768	1	0.9006	0.9066	1	1	0.831	0.9471	0.8735	0.9723	0.8768	0.9344	0.9542	1	0.6801		0.9168	0.9532	0.9156	0.8621	0.7505	1
ARTN	2483	AP	4.1			0	0.7644	1	0.2097	0.0837	0.799	0.2186	0.583	0.1381	0.6085	0.5966	0.3015	0.4457	0.5668	0.5358	0.4308	0.7772	0	0.5325	0.2683	0.6991	0.5935	0.5653	0.5974	0.7362	0.6381	0.1361	0.4903	0.5411	0.3648		0.5455	0.6702		0.5411		1		0.5393	0.5438	0.5698	0.4058	0.3081	0
ARTN	2485	AP	3.1			0	0.7644	0.9523	0.1576	0.5583	0	0.1215	0.1707	0.3074	0.1881	0.0905	0.3355	0.3307	0.1261	0.2385	0.137	0	0.7473	0	0.5971	0.1414	0.1981	0.142	0.1329	0	0.1291	0.4543	0.1818	0.0669	0.0861		0.2923	0.1243		0.0669		0		0.1	0	0	0.373	0.2536	0.7689
ARTN	2486	AP	1			0	0.7644	1	0.1736	0.358	0.201	0.6599	0.2463	0.5544	0.2035	0.3129	0.363	0.2236	0.3071	0.2258	0.4322	0.2228	0.2527	0.4675	0.1346	0.1594	0.2084	0.2927	0.2697	0.2638	0.2328	0.4096	0.3279	0.392	0.549		0.1622	0.2055		0.392		0		0.3607	0.4562	0.4302	0.2212	0.4383	0.2311
IPO13	2491	AP	16.1			0	0.9983	0.9207	0.1217	0.2218	0.067	0.0541	0.0871	0.0778	0.0343	0.0394	0.0173	0.0453	0.0431	0.0807	0.043	0.0145	0.0662	0.063	0.0232	0.0533	0.0385	0.0968	0.1123	0.0028	0	0.0658	0.0448	0.0321	0.0573	0.0505	0.1073	0	0.0357	0.0276	0.0099	0.015	0.0146	0.1037	0	0.0396	0.0936	0.0457	0.0363
IPO13	2492	AP	1			0	0.9983	0.9207	0.1217	0.7782	0.933	0.9459	0.9129	0.9222	0.9657	0.9606	0.9827	0.9547	0.9569	0.9193	0.957	0.9855	0.9338	0.937	0.9768	0.9467	0.9615	0.9032	0.8877	0.9972	1	0.9342	0.9552	0.9679	0.9427	0.9495	0.8927	1	0.9643	0.9724	0.9901	0.985	0.9854	0.8963	1	0.9604	0.9064	0.9543	0.9637
DPH2	2496	ES	4	3.2	5	0	1	0.1522	0.0128	0.989	1	1	1	0.9784	0.9836	1	0.9873	1	0.9919	1	0.9784	1	0.98	1	0.9914	1	0.9809	0.9878	0.9889	0.9705	1	1	1	0.9885	0.9945	0.9787	0.9907	0.9745	1	1	1	0.9834	1	0.9898	0.9904	0.9874	1	0.996	1
DPH2	2497	ES	3.1:3.2	2.1	4	0	0.8377	0.4325	0.0784	0.9313	1		1	1	0.7549		0.8399	1	0.8904	0.968	1		0.8338	1	1	1		0.9473	1		1	1	1	1	0.9195	1	0.9373			1		1	1	1	1	1	1	0.6861	0.6791
DPH2	2499	ES	3.2	2.1	4	0	0.9913	0.4761	0.0254	0.9828	1	0.9707	1	1	0.9795	1	0.9918	1	0.9829	0.9949	1	1	0.975	1	1	1	1	0.9942	1	1	1	1	1	1	0.9929	1	0.9932	1	1	1	1	1	1	1	1	1	1	0.9387	0.9813
DPH2	2500	AA	3.1	2.1	3.2	0	0.9564	0.8426	0.1017	0.1985	0.0747	0	0.1878	0.1145	0.0644	0.0263	0.0433	0.0485	0.1315	0.1414	0.0668	0	0.1207	0.1095	0.0506	0.1547	0.0141	0.1006	0.1167	0.0289	0.0492	0.1412	0.0819	0.0692	0.0799	0.0869	0.0985	0	0.0472	0.0672	0.0252	0.0604	0.1591	0.0742	0.0445	0.1406	0.1514	0.1323	0.0422
DPH2	2501	AD	2.2	2.1	3.2	0	0.9442	0.774	0.0801	0.0724	0.0199	0.0839	0.1153	0.2016	0.0406	0.0199	0.0329	0.0309	0.0592	0.0475	0.0486	0	0.0567	0.0973	0.0625	0.0169	0.0133	0.0935	0.065	0	0.0721	0.0665	0.082	0.0218	0.0292	0.0176	0.0758	0.0176	0.0092	0.0514	0.0283	0.0178	0.0101	0.0197	0.0087	0.03	0.1826	0.1179	0.0163
DPH2	2502	AD	1.3	1.2	2.1	0	0.9546	0.0678	0.006	1	1	0.9816	1	1	0.9921	1	1	1	1	1	1	1	1	1	1	1	1	1	1	1	1	1	1	1	1	1	1	1	1	1	1	1	1	1	1	0.9764		1	1
DPH2	2503	AD	1.2:1.3	1.1	2.1	0	0.9878	0.3737	0.0491	0.9087	0.9326	0.9186	0.9499	0.8651	0.9599	1	0.9289	0.918	0.894	0.9304	0.8736	0.9444	0.9582	0.8217	0.9817	0.8769	0.9586	0.9243	0.9256	0.8612	0.9283	0.9648	0.9263	0.8956	0.9244	0.9714	0.9437	0.8736	0.8829	0.8722	0.9227	0.983	0.9144	0.9591	0.8671	0.9051	1	0.9659	0.9263
ATP6V0B	2505	AP	1.1			0	1	0.6146	0.0478	0.9469	0.9542	0.9744	0.9942	0.9628	0.99	0.9786	0.9916	0.9859	0.9872	0.9647	0.9689	0.9972	0.9888	0.9891	0.9805	1	0.9968	0.9911	0.9779	0.9829	0.9951	0.973	0.9706	0.9933	0.9904	0.9752	0.9642	0.9863	0.9892	0.9904	0.9925	0.9969	1	0.9632	0.9984	0.9893	0.9875	0.9922	0.9911
ATP6V0B	2506	AP	3.1			0	1	0.6146	0.0478	0.0531	0.0458	0.0256	0.0058	0.0372	0.01	0.0214	0.0084	0.0141	0.0128	0.0353	0.0311	0.0028	0.0112	0.0109	0.0195	0	0.0032	0.0089	0.0221	0.0171	0.0049	0.027	0.0294	0.0067	0.0096	0.0248	0.0358	0.0137	0.0108	0.0096	0.0075	0.0031	0	0.0368	0.0016	0.0107	0.0125	0.0078	0.0089
ATP6V0B	2509	RI	7.2	7.1	7.3	0	1	0.6745	0.0481	0.0768	0.0424	0.0175	0.0423	0.0528	0.0213	0.0217	0.0057	0.0229	0.0134	0.0503	0.021	0.0025	0.0546	0.0503	0.0148	0.0195	0.0075	0.0127	0.0503	0.0107	0.0252	0.0381	0.0486	0.0124	0.0146	0.022	0.04	0.0085	0.0117	0.0154	0.0051	0.0095	0.0055	0.0172	0.003	0.0152	0.0164	0.0093	0.006
ATP6V0B	2510	ES	2.1:2.2	1.1	3.2	0	0.9965	1	0.1507	0.4027	0.139	0.1287	0.2631	0.348	0.0814	0.2145	0.1269	0.2004	0.2427	0.363	0.208	0.0998	0.1731	0.2101	0.2236	0.0612	0.1111	0.1543	0.2538	0.1418	0.1017	0.1422	0.2071	0.0456	0.1365	0.2529	0.2441	0.0615	0.0491	0.1635	0.0789	0.1003	0.0571	0.2256	0.0256	0.0735	0.0886	0.0947	0.1
ATP6V0B	2511	ES	2.2	1.1	3.2	0	1	0.3016	0.028	0.9635	0.8123	0.9369	0.955	0.9562	0.9363	0.9723	0.9521	0.9346	0.9612	0.9525	0.9591	0.9721	0.9218	0.9413	0.9702	0.9223	0.9632	0.9611	0.9506	0.9641	0.9358	0.9268	0.882	0.9274	0.9425	0.9746	0.9346	0.9699	0.9468	0.9649	0.9308	0.9482	0.9672	0.9402	0.9235	0.9149	0.9269	0.9429	0.9502
ATP6V0B	2512	AD	1.2	1.1	3.2	0	0.9721	0.5006	0.0688	0.181	0	0.0408	0.1099	0.1292	0.021	0.0676	0.0374	0.0468	0.046	0.2012	0.0671	0.028	0	0.0322	0.0867	0.0056	0.0295	0.0437	0.0475	0.0352	0	0	0.0252	0.033	0.0566	0.1798	0.069	0	0.0444	0.0344	0.0335	0.0635	0.0288	0.0461	0.0041	0	0.0039	0.0284	0.0405
ATP6V0B	2513	AA	2.1	1.1	2.2	0	1	0.4085	0.0319	0.0272	0.0408	0.0107	0.0179	0.0272	0.0066	0.0085	0.008	0.0193	0.0141	0.0307	0.0126	0.0036	0.0197	0.0191	0.0097	0.0059	0.0053	0.0081	0.0191	0.0074	0.0083	0.0143	0.0368	0.0041	0.0106	0.0099	0.0248	0.0023	0.0032	0.0079	0.007	0.0067	0.0023	0.0207	0.0024	0.0081	0.0086	0.0069	0.0065
B4GALT2	2514	AP	2.1			0	0.836	1	0.231	0.7468	0.5841	0.3959	0.3214	0.6789	0.4292	0.5198	0.6724	0.4673	0.3563	0.444	0.8024	0.3423	0.2808	0.4999	0.7719	0.5037	0.53	0.7112	0.5548	0.5139	0.4432	0.5245	0.4915	0.4443	0.2669	0.2299	0.8849			0.4036	0.3606			0.9565	0.4402	0.4423	0.4203	0.9305
B4GALT2	2515	AP	1			0	0.836	1	0.231	0.2532	0.4159	0.6041	0.6786	0.3211	0.5708	0.4802	0.3276	0.5327	0.6437	0.556	0.1976	0.6577	0.7192	0.5001	0.2281	0.4963	0.47	0.2888	0.4451	0.4861	0.5568	0.4755	0.5085	0.5557	0.7331	0.7701	0.1151			0.5964	0.6394			0.0435	0.5598	0.5577	0.5797	0.0695
B4GALT2	2516	AA	4.1	3	4.2	0	0.9895	0.0213	0.0027	1	1	1	1	1	1	1	0.9982	1	0.997	0.9966	1	1	1	1	1	1	1	1	0.99	1	1	1	1	1	0.9977	1	1	1	0.9829	1	1	1	1	1	1	0.9952	1	1	1
B4GALT2	2517	AD	2.2	2.1	3	0	0.9093	0.6415	0.1412	1	0.8214	1	1	1	0.8493	0.9176	0.5914	0.8579	0.8477	0.9151	1	1	0.6525	1	0.738	0.6264	1	0.8988	1	0.6356	0.5809	1	1	0.7592	0.8061	1	0.7392	1		0.7703	1	1		0.93	0.7541	0.5902	1	0.9012
CCDC24	2518	AP	2			0	0.8621	0.8013	0.1328	0.4236	0.6973	0.1576	0.4621	0.2989	0.4272	0.4021	0.297	0.1902	0.2929	0.4001	0.3629	0.5591		0.3972	0.4072	0.1942	0.487	0.2402	0.0352			0.3877	0.3402	0.5546	0.2523	0.1496	0.4605		0.5864	0.5701	0.2289	0.4204	0.7932	0.3027	0.428	0.2262	0.2773	0.2698	0.5294
CCDC24	2519	AP	3.1			0	0.8621	0.7718	0.1482	0.4852	0.0834	0.735	0.5102	0.7011	0.393	0.5391	0.6443	0.6543	0.5695	0.5055	0.5676	0.3042		0.4779	0.5095	0.6074	0.4492	0.7235	0.6052			0.5868	0.399	0.3036	0.7477	0.468	0.3412		0.2501	0.2058	0.5371	0.3288	0.2068	0.6088	0.4991	0.7738	0.7227	0.3165	0.23
CCDC24	2520	AP	1			0	0.8621	0.6325	0.1213	0.0912	0.2193	0.1074	0.0278	0	0.1798	0.0587	0.0588	0.1555	0.1376	0.0944	0.0696	0.1367		0.1249	0.0833	0.1985	0.0638	0.0364	0.3596			0.0256	0.2608	0.1418	0	0.3824	0.1982		0.1635	0.2242	0.234	0.2507	0	0.0884	0.0729	0	0	0.4137	0.2406
CCDC24	2523	AA	8.1	7.3	8.2	0	0.9407	0.3433	0.0535	0.9492	0.9055	0.92	0.9018	0.9256	0.9763	0.9526	0.8671	0.9503	0.8326	0.8804	0.9565	0.8372	0.8701	0.9751	0.8516	1	0.9844	0.9222	0.9732	0.9503	0.7928	0.9199	0.8271	0.8985	0.9371	0.7566	0.9264	0.8516	0.8583	1	0.9305	0.9421	0.9387	0.9374	0.8725	0.9134	0.6906	0.9281	0.9228
CCDC24	2524	RI	7.2	7.1	7.3	0	0.9756	1	0.0732	0.0561	0.0964	0.068	0.1184	0.0617	0.067	0.1014	0.0394	0.093	0.0822	0.094	0.0795	0.0091	0.0868	0.0749	0.0568		0.0066	0.0992	0.1179	0	0.0221	0.1166	0.0504	0.141	0.1491	0	0.0559	0.2313	0.0185	0.0586	0.0312	0.0355	0.096	0.0432	0.0189	0.0522	0.0477	0.0534	0.0232
CCDC24	2525	RI	6.3	6.2	6.4	0	1	0.9704	0.123	0.3838	0.3496	0.1271	0.2615	0.3638	0.0982	0.2083	0.0966	0.2476	0.2521	0.2672	0.157	0.153	0.4185	0.1973	0.2475	0.195	0.1323	0.1875	0.3193	0.1846	0.1955	0.2509	0.3679	0.1218	0.1732	0.1766	0.2963	0.1712	0.1146	0.0959	0.192	0.0767	0.1278	0.2609	0.0296	0.1147	0.2526	0.2067	0.1317
CCDC24	2526	AA	6.1	5	6.2	0	0.8796	0.6929	0.1126	0.244	0.3562	0.2296	0.2321	0.2438	0.3006	0.3767	0.1184	0.2438	0.2397	0.392	0.1947	0.3086	0.5371	0.1947	0.0882		0.3346	0.2681	0.0538	0.4583	0.392	0.3495	0.3259	0.2745	0.2304	0.2214	0.3721		0.3523	0	0.2293	0.2894	0.3672	0.2184	0.244	0.244	0.6171	0.3086	0.2973
CCDC24	2527	ES	4.1:4.2:5:6.1	3.2	6.2	0	0.8621	0.8992	0.157	1	1	0.775	0.6878	1	0.797	0.8164	0.3343	0.467	0.7565	0.7763	0.8781	0.7444	1	1			0.8024	0.9628		1	1	0.865	0.8438	1	0.5072		0.9527	0.6232	0.8995		0.5092	0.8095	1	0.749	0.5784	0.575	0.8061	1	1
CCDC24	2528	ES	4.2:5:6.1	3.2	6.2	0	0.8185	0.9714	0.1574	1	1	0.8587	0.6308	1	0.7091	0.8672	0.563	0.3763	0.8269	0.7365	0.9376	0.9133	1	1		0.7922	0.9035	0.9632		1	1	0.803	0.8209	1	0.6787	1	0.9527	0.6178	0.788		0.7084	0.7963	1	0.8653	0.6843		0.7434	1	1
CCDC24	2530	ES	4.1:4.2:5	3.2	6.2	0	0.9686	0.5793	0.0882	1	1	0.9185	0.8765	1	0.8989	0.8775	0.7845	0.7258	0.9056	0.8398	0.9667	0.864	1	1	0.7672	0.6417	0.8872	0.9857	1	1	1	0.9207	0.9158	1	0.77	1	0.9707	0.8695	0.9413	1	0.7725	0.9104	1	0.9123	0.8056	0.8034	0.7152	1	1
CCDC24	2531	ES	4.2:5	3.2	6.2	0	0.9424	0.7714	0.1067	1	1	0.9521	0.8464	1	0.8468	0.9133	0.9034	0.6459	0.9366	0.8086	0.9838	0.9584	1	1	0.9241	0.8848	0.9477	0.9858	1	1	1	0.8809	0.9023	1	0.873	1	0.9707	0.867	0.8695	1	0.8884	0.9035	1	0.9573	0.8676	0.2851	0.6366	1	1
CCDC24	2532	AA	4.1	3.2	4.2	0	0.9058	0.8688	0.1618	0.7915	0.3786	0.3993	0.6042	0.5449	0.6517	0.4439	0.3056	0.6263	0.4232	0.5871	0.3625	0.2349	0.456	0.4666	0.2304	0.2042	0.3328	0.5415	0.4391	0.3153	0.5995	0.6468	0.5778	0.4532	0.3564	0.1872	0.5348	0.5449	0.7398	0.3099	0.3391	0.557	0.6148	0.3488	0.4252	0.9242		0.5044	0.3288
SLC6A9	2533	AP	1			0	0.8778	0.6823	0.065	0.9142	0.9774	1	0.9626	0.9595	1	0.8499	1	0.9514	0.8785	0.9776	1	1	0.9635	1	1	1	0.9676	0.9643	0.9368	1	0.9769	1	0.9187	0.9742	0.9823	0.9189	0.9648		1	1				1				0.9882	1
SLC6A9	2534	AP	3			0	0.8778	0.3324	0.0371	0.0336	0	0	0	0	0	0	0	0	0.1215	0.011	0	0	0.0143	0	0	0	0	0.014	0.0153	0	0	0	0.0318	0.017	0	0	0.0268		0	0				0				0.0046	0
SLC6A9	2535	AP	4			0	0.8778	0.3857	0.0413	0.0522	0.0226	0	0.0374	0.0405	0	0.1501	0	0.0486	0	0.0114	0	0	0.0223	0	0	0	0.0324	0.0218	0.0479	0	0.0231	0	0.0496	0.0088	0.0177	0.0811	0.0084		0	0				0				0.0072	0
SLC6A9	2536	AT	16			0	1	0.3289	0.0451	0.8451	0.9017	0.9185	0.8366	0.8642	0.914	0.9105	0.8227	0.8554	0.7661	0.8809	0.9061	0.8458	0.9042	0.8224	0.8641	0.9062	0.8606	0.9177	0.8476	0.892	0.9227	0.8305	0.8859	0.9276	0.8718	0.8675	0.9087	0.9339	0.8782	0.895	0.9229	0.8291	0.892	0.8869	0.8718	0.9354	0.8966	0.9447	0.8527
SLC6A9	2538	AT	17			0	1	0.3289	0.0451	0.1549	0.0983	0.0815	0.1634	0.1358	0.086	0.0895	0.1773	0.1446	0.2339	0.1191	0.0939	0.1542	0.0958	0.1776	0.1359	0.0938	0.1394	0.0823	0.1524	0.108	0.0773	0.1695	0.1141	0.0724	0.1282	0.1325	0.0913	0.0661	0.1218	0.105	0.0771	0.1709	0.108	0.1131	0.1282	0.0646	0.1034	0.0553	0.1473
SLC6A9	2539	RI	14.3	14.2	14.4	0	0.9302	0.0968	0.0188	0.0179	0.0142	0	0.0118	0.0204	0	0.0345	0	0	0.0286	0.0127	0.0123	0	0	0	0	0	0	0	0	0	0	0.0526	0	0.0316	0	0	0	0	0.037	0	0	0	0	0	0.033	0		0.0251	0.0164
SLC6A9	2540	AA	14.1	13	14.2	0	0.9319	0.23	0.0353	0.9653	1	1	1	1	1	1	0.9583	1	0.8659	0.9744	1	1	0.9652	0.9583	0.9305		0.8959	0.9799	0.9725	1	0.9451	1	1	0.9905	0.9799	1	0.9835		1	1		1		1	1			0.9774	1
SLC6A9	2542	ES	06:07:00	2	8	0	0.9791	0.1655	0.026	1	1	1	1	1	0.9586	1	1	1	1	0.9934	1	0.9655	1	1	1	0.8345	1	1	0.9743	1	0.9506	1	1	1	1	1	0.9826	1	1	0.9634	1	1	1	1	1	1		0.987	1
SLC6A9	2544	ES	6	2	7	0	0.9703	0.3361	0.0357	1	0.9833	1	0.9781	1	1	1	1	1	1	0.9935	0.9613	1	1	1	1	1	0.9629	1	0.9342	1	0.9757	0.9099	1	0.9702	1	1	0.9802	1	0.9501	1	1		1	0.9394	1	1		0.979	1
DMAP1	2545	RI	1.2:1.3	1.1	1.4	0	0.9843	0.6484	0.1204	0.8893	0.8172	0.8074	0.8328	0.754	0.7455	0.792	0.7933	0.7623	0.8957	0.8142	0.8921	0.7274	1	0.8846	0.9244	0.6789	0.7682	0.7818	0.7272	0.8766	0.7258	0.8906	0.9056	0.8425	0.9106	0.6914	0.6997	0.8676	0.6052	0.9102	1	0.64	0.8146	0.8692	0.9381	0.5785	1	0.824	0.5376
DMAP1	2546	AA	1.3	1.1	1.4	0	0.9703	0.4624	0.0687	0.9136	0.9324	0.9113	0.8351	0.8529	0.8517	0.8867	0.904	0.8854	0.9421	0.9018	0.9326	0.8399	1	0.9324	0.9216	0.7829	0.9081	0.9074	0.8854	0.9062	0.8568	0.917	0.9744	0.8432	0.9049	0.8083	0.8989	0.8992	0.8323	0.9668	1	0.8476	0.9274	0.9409	0.9589	0.8556	1	0.8952	0.765
DMAP1	2547	RI	1.2	1.1	1.3	0	0.9843	0.9181	0.1244	0.4757	0.2717	0.3149	0.5266	0.3671	0.3547	0.3471	0.3026	0.2961	0.3641	0.3365	0.3851	0.3528	0.2552	0.3833	0.5379	0.3819	0.2635	0.2856	0.2697	0.4372	0.3383	0.452	0.219	0.5136	0.5398	0.3593	0.2194	0.4427	0.2567	0.269	0.1514	0.2856	0.263	0.3224	0.4456	0.2106	0.6272	0.3763	0.2886
ERI3	2548	AP	1			0	1	1	0.087	0.9235	0.9893	0.9857	1	0.9548	0.9799	1	0.9506	0.9281	0.9785	0.99	0.93	0.9602	0.9788	0.9661	1	0.9805	0.8518	0.9946	0.9812	0.9781	1	0.9962	0.9769	0.9842	0.9836	1	0.9787	0.9731	0.9864	0.9621	0.9875	0.9679	0.9534	0.8678	0.9957	0.9956	0.9797	0.9522	0.9622
ERI3	2549	AP	2.1			0	1	0	0	0	0	0	0	0	0	0	0	0	0	0	0	0	0	0	0	0	0	0	0	0	0	0	0	0	0	0	0	0	0	0	0	0	0	0	0	0	0	0	0
ERI3	2550	AP	4			0	1	1	0.087	0.0765	0.0107	0.0143	0	0.0452	0.0201	0	0.0494	0.0719	0.0215	0.01	0.07	0.0398	0.0212	0.0339	0	0.0195	0.1482	0.0054	0.0188	0.0219	0	0.0038	0.0231	0.0158	0.0164	0	0.0213	0.0269	0.0136	0.0379	0.0125	0.0321	0.0466	0.1322	0.0043	0.0044	0.0203	0.0478	0.0378
ERI3	2552	ES	3	2.2	5	0	1	0.1966	0.0225	0.9824	0.9342	0.9499	0.9511	0.942	0.9563	0.964	0.9579	0.9464	0.9574	0.9548	0.9442	0.9624	0.9448	0.9491	0.9253	0.9559	0.9613	0.9482	0.9294	0.9839	0.9615	0.9763	0.9566	0.9762	0.9337	1	0.9675	0.9445	0.8907	0.9451	0.9161	0.9564	0.9791	0.938	0.9264	0.9597	0.9221	0.9473	0.9953
RNF220	2553	AP	3			0	0.9948	0.7257	0.0449	0	0	0	0.0059	0	0.0243	0	0	0	0.0369	0.0257	0.0219	0	0	0.0283	0	0	0	0	0	0	0	0.0086	0	0	0	0	0	0.0435	0	0	0	0	0	0	0	0.0147	0	0.0148	0.0333
RNF220	2554	AP	1.1			0	0.9948	0.3645	0.0409	0.0816	0	0.0159	0.0294	0	0.3036	0	0.0244	0.0528	0	0.0541	0.0557	0.1163	0	0.0324	0.0518	0	0	0.0057	0.0161	0.0577	0.0086	0	0.0205	0.0147	0.0254	0.0293	0.0093	0.0166	0.0117	0	0	0.0797	0	0	0.0522	0.0339	0.0209	0.0395	0.0127
RNF220	2555	AP	7			0	0.9948	0.8581	0.0696	0.9184	1	0.9841	0.9647	1	0.6721	1	0.9756	0.9472	0.9631	0.9202	0.9225	0.8837	1	0.9393	0.9482	1	1	0.9943	0.9839	0.9423	0.9914	0.9914	0.9795	0.9853	0.9746	0.9707	0.9907	0.9399	0.9883	1	1	0.9203	1	1	0.9478	0.9514	0.9791	0.9458	0.954
RNF220	2557	AT	10.2			0	1	0.315	0.0452	0.2056	0.1461	0.1287	0.0707	0.1454	0.0706	0.0864	0.1179	0.146	0.2139	0.1929	0.1523	0.1336	0.1199	0.1879	0.053	0.1064	0.1353	0.1796	0.1201	0.1236	0.0813	0.1336	0.0855	0.1929	0.1771	0.1279	0.1209	0.1914	0.2901	0.1984	0.0587	0.2596	0.2054	0.126	0.2204	0.1054	0.0896	0.1891	0.1738
RNF220	2558	AT	17			0	1	0.315	0.0452	0.7944	0.8539	0.8712	0.9293	0.8546	0.9294	0.9136	0.8821	0.854	0.7861	0.8071	0.8477	0.8664	0.8801	0.8121	0.947	0.8936	0.8647	0.8204	0.8799	0.8764	0.9187	0.8664	0.9145	0.8071	0.8229	0.8721	0.8791	0.8086	0.7099	0.8016	0.9413	0.7404	0.7946	0.874	0.7796	0.8946	0.9104	0.8109	0.8262
RNF220	2559	AD	9.2	9.1	10.1	0	0.9983	0.5165	0.077	0.6015	0.5865	0.566	0.518	0.388	0.517	0.5576	0.5311	0.5422	0.3974	0.5577	0.5107	0.5726	0.5401	0.5212	0.4292	0.4997	0.5976	0.44	0.5106	0.6468	0.5631	0.5933	0.5288	0.5727	0.5497	0.4915	0.3276	0.5479	0.6097	0.6544	0.5388	0.6644	0.5087	0.5434	0.6334	0.5071	0.5674	0.565	0.5157
TMEM53	2561	AT	5			0	1	0.4613	0.0793	0.4261	0.3888	0.3679	0.3957	0.3162	0.3756	0.3544	0.3489	0.3906	0.6469	0.393	0.4121	0.3556	0.3509	0.4944	0.3511	0.2899	0.3824	0.4265	0.3506	0.4039	0.3876	0.3752	0.369	0.3582	0.5153	0.3402	0.4251	0.396	0.6007	0.5138	0.3253	0.4955	0.4018	0.2971	0.4606	0.3453	0.453	0.4265	0.3375
TMEM53	2562	AT	3.3			0	1	0.4613	0.0793	0.5739	0.6112	0.632	0.6043	0.6838	0.6244	0.6456	0.6511	0.6094	0.3531	0.607	0.5879	0.6444	0.6491	0.5056	0.6489	0.7101	0.6176	0.5735	0.6494	0.5961	0.6124	0.6248	0.631	0.6418	0.4847	0.6598	0.5749	0.604	0.3993	0.4862	0.6747	0.5045	0.5982	0.7029	0.5394	0.6547	0.547	0.5735	0.6625
TMEM53	2563	AA	3.1	2	3.2	0	0.9948	0.4951	0.0755	0.7828	0.8455	0.8282	0.8375	0.9038	0.8226	0.8493	0.7072	0.8459	0.8338	0.8536	0.8716	0.8905	0.7848	0.7892	0.8447	0.7275	0.8685	0.8099	0.7843	0.9151	0.8937	0.8248	0.9082	0.8469	0.8063	0.9303	0.8375	0.8031	0.723	0.8447	0.8886	0.8638	0.8772	0.9418	0.7544	0.89	0.8846	0.7414	0.9102
TMEM53	2568	ES	2	1	4	0	0.8482	0.6944	0.1206	0.9555	0.8684	0.8423	1	1	0.942	0.9362	0.8523		0.9533	0.7389	0.8785	0.7448		0.8802			0.8907	0.7097	1	0.8981	0.9205	0.9223	0.7904	0.9493	0.9137	0.8884	0.8977	1	0.9354	0.8832	0.9125	0.9083	0.8157	0.6883	0.7028	0.8033	1	0.5519	0.8644
KIF2C	2573	AP	3.1			0	0.8255	0.2765	0.0265	0	0	0	0		0	0	0.0159	0	0	0	0.0203	0	0	0	0	0	0	0	0	0	0	0	0	0	0	0	0	0		0	0	0	0	0	0	0	0	0
KIF2C	2574	AP	1			0	0.8255	0.2765	0.0265	1	1	1	1		1	1	0.9841	1	1	1	0.9797	1	1	1	1	1	1	1	1	1	1	1	1	1	1	1	1	1		1	1	1	1	1	1	1	1	1
KIF2C	2575	ES	7	6	8	0	0.8901	0.3954	0.0496	0.9653	1	0.9755	0.9549		0.8981	0.9308	0.971	1	0.9651	0.9733	1	1	1	0.9282	0.9669	1	0.9747	0.9334	0.9211	0.9686	1	0.9524	0.9905	1	0.9493	1	0.9515	0.9125	1	0.9794	1	0.9726	1	0.8929	1	1	0.9303	0.9811
RPS8	2577	AD	3.2	3.1	4	0	1	0.0152	0.0018	0.9905	0.9942	0.994	0.994	0.9933	0.9941	0.9931	0.992	0.9964	0.9962	0.991	0.9916	0.9956	0.9962	0.9938	0.9921	0.9937	0.9969	0.9963	0.9946	0.9919	0.9913	0.9941	0.9943	0.9932	0.9939	0.993	0.9961	0.9957	0.9935	0.9937	0.9913	0.9952	0.9955	0.9958	0.9931	0.9938	0.9962	0.9953	0.9943
PLK3	2578	ES	13	12	14	1	0.8778	0.4348	0.063	0.9211	0.8757	0.8728	0.8294	0.8335	0.8616		0.8822	0.8847	0.798	0.8956	0.9342	0.9508	0.8766	0.8195	0.7636	0.8237	0.8996	0.8875	0.9028		0.7988	0.8732	0.8739	0.9318	0.7501	0.863	0.9014	0.8898	0.836	0.8659	0.8066	0.9164		0.9058	0.9069	0.8562		0.8639	0.8451
BTBD19	2581	AT	7.2			0	0.9442	0.5593	0.0508	0	0.5593	0	0	0	0	0	0	0	0.0305	0.0444	0	0	0	0	0	0	0	0	0	0	0	0	0	0	0	0	0		0	0	0	0	0	0	0	0.0811		0	0
BTBD19	2582	AT	9			0	0.9442	0.5593	0.0508	1	0.4407	1	1	1	1	1	1	1	0.9695	0.9556	1	1	1	1	1	1	1	1	1	1	1	1	1	1	1	1	1		1	1	1	1	1	1	1	0.9189		1	1
PTCH2	2586	AT	22.2			0	0.9442	0.9992	0.1587	0.7823	0.8577	0.8509	0.9733	0.9234	0.6735	1			0.8319	0.9114	0.9195	0.9167	0.8839	1	0.8556	1	0.9767	0.8856	0.9312	0.9332	0.9824	0.8008	0.9234	1	0.9669	0.8894	0.9423	0.6037	0.8354	0.9195		1	1	0.9549	0.3304	0.953	0.7476	0.8119	0.7655
PTCH2	2587	AT	23			0	0.9442	0.9992	0.1587	0.2177	0.1423	0.1491	0.0267	0.0766	0.3265	0			0.1681	0.0886	0.0805	0.0833	0.1161	0	0.1444	0	0.0233	0.1144	0.0688	0.0668	0.0176	0.1992	0.0766	0	0.0331	0.1106	0.0577	0.3963	0.1646	0.0805		0	0	0.0451	0.6697	0.047	0.2524	0.1881	0.2345
EIF2B3	2588	AT	10.2			0	1	0.8353	0.085	0.3117	0.178	0.2142	0.1673	0.1013	0.1341	0.1171	0.0991	0.3099	0.1408	0.142	0.1461	0.2202	0.203	0.0963	0.1605	0.1651	0.1562	0.1743	0.1247	0.2288	0.1875	0.261	0.1959	0.1437	0.1004	0.1558	0.1286	0.1674	0.2279	0.2438	0.3029	0.2095	0.1564	0.1375	0.2147	0.167	0.1631	0.2314	0.1075
EIF2B3	2589	AT	12			0	1	0.8353	0.085	0.6883	0.822	0.7858	0.8327	0.8987	0.8659	0.8829	0.9009	0.6901	0.8592	0.858	0.8539	0.7798	0.797	0.9037	0.8395	0.8349	0.8438	0.8257	0.8753	0.7712	0.8125	0.739	0.8041	0.8563	0.8996	0.8442	0.8714	0.8326	0.7721	0.7562	0.6971	0.7905	0.8436	0.8625	0.7853	0.833	0.8369	0.7686	0.8925
HECTD3	2592	RI	8.2	8.1	8.3	0	0.993	0.4215	0.0563	0.0755	0.0327	0.0129	0.0701	0.0843	0.0384	0	0.0217	0.0624	0.0167	0.0595	0.0362	0.0052	0.0335	0.0429	0.0137	0.0679	0.0162	0.0222	0.0689	0.0345	0.006	0.0182	0.0542	0.0117	0.0144	0.0572	0.0328	0	0	0.0197	0.0463	0.0194	0	0.04	0	0.0311		0.0232	0.0147
MUTYH	2593	AP	3			0	0.9843	0.6637	0.1222	0.2491	0.1067	0.4099	0.1784	0.1908	0.293	0.1146	0.5731	0.2251	0.2839	0.2264	0.1331	0.3613	0.2213	0.1176	0.3482	0.0844	0.1657	0.3668	0.1666	0.1779	0.323	0.1548	0.2401	0.2318	0.1818	0.4917	0.2838	0.3791	0.1954	0.4091	0.3337	0.3239	0.1143	0.2515	0.3548	0.1358	0.1159	0.4349	0.0949
MUTYH	2594	AP	2			0	0.9843	0.4402	0.0689	0.1447	0.1628	0.134	0.2307	0.1645	0.2006	0.2469	0.1365	0.2426	0.3281	0.2928	0.205	0.1557	0.1431	0.4056	0.2335	0.1455	0.2857	0.1418	0.1675	0.2812	0.1532	0.2478	0.2328	0.2199	0.2177	0.2384	0.1922	0.1634	0.2105	0.1763	0.1027	0.2285	0.3449	0.1219	0.1768	0.2368	0.3748	0.1467	0.2318
MUTYH	2595	AP	1.1			0	0.9843	0.7847	0.1203	0.6062	0.7305	0.456	0.5908	0.6447	0.5065	0.6386	0.2904	0.5323	0.388	0.4808	0.6619	0.483	0.6356	0.4768	0.4183	0.77	0.5486	0.4914	0.6659	0.5409	0.5238	0.5975	0.5271	0.5483	0.6005	0.2699	0.5239	0.4574	0.5941	0.4146	0.5636	0.4476	0.5407	0.6266	0.4684	0.6275	0.5092	0.4184	0.6733
MUTYH	2600	ES	11:12:13:14:15	10	16	0	0.993	0.0742	0.012	0.9539	1	1	0.9538	1	1	1	1	1	1	1	1	1	1	1	1	1	1	1	1	0.969	0.978	1	1	1	0.9884	1	1	1	1	1	1	1	1	1	1	1	1	1	1
MUTYH	2601	ES	08:09:00	7	10	0	0.9948	0.0958	0.0128	1	1	1	1	1	0.9877	0.9707	1	1	0.9887	1	0.9882	1	1	1	1	1	1	1	1	1	1	1	1	1	0.9876	1	0.9769	1	1	1	1	1	1	1	1	1	1	1	1
MUTYH	2603	ES	8	7	9	0	0.993	0.1434	0.0211	1	1	1	0.9766	1	0.988	0.9725	1	1	0.9921	1	1	1	1	1	1	1	1	1	1	1	1	1	1	1	1	1	1	0.9583	1	1	1	1	1	0.9764	1	1	1	0.9783	1
MUTYH	2609	ES	6.4:6.5	5	7	0	0.9895	0.351	0.0313	0.9819	1	0.9165	0.9385	1	0.9472	1	0.9723	1	0.9869	1	0.9778	1	1	1	0.9661	1	1	1	0.9272	1	0.9182	1	1	1	1	1	0.9653	1	1	1	1	1	1	1	0.9684	1	1	0.9901	1
MUTYH	2612	ES	6.2:6.3:6.4:6.5:7:8:9:10:11:12:13:14:15:16:17:18	5	19	0	0.8429	0.6681	0.0806	1	1	1	0.9312	1	1	1	1	1	0.9204	1	1	1	1	1	1	1	1	1	0.8974		1	1	1	1	1	1	1	1		1	1	1	1	1	1	1	1	1	1
MUTYH	2613	ES	6.3:6.4:6.5:7:8:9:10:11:12:13:14:15:16:17:18	5	19	0	0.8709	0.4354	0.0604	1	1	1	0.9562	1	1	1	1	1	0.7582	1	1	1	1	1	1	1	1	1	0.9568	1	1	1	1	1	1	1	1		1	1		1	1	1	1	1		1
MUTYH	2614	ES	6.4:6.5:7:8:9:10:11:12:13:14:15:16:17:18	5	19	0	0.9878	0.1232	0.0163	1	1	1	0.9828	1	1	1	1	1	0.9892	1	1	1	1	1	1	1	1	1	0.9388	1	1	1	1	1	1	1	1	1	1	1	1	1	1	1	1	1	1	1	1
MUTYH	2615	ES	6.5:7:8:9:10:11:12:13:14:15:16:17:18	5	19	0	0.7888	0.4108	0.0683	1	1			1	1	1	1	1	0.8234	1	1	1	1	1	1	1	1	1	0.6271	1	1	1	1		1	1	1	1		1	1	1				1	1	1
MUTYH	2651	ES	6.3:6.4:6.5:7:8:9	5	10	0	0.8255	0.6329	0.0921	1	1	1	0.9528	1	1	0.7959	0.9399		0.8911	0.8808	1	1	1		1	1	1	1	1	0.9003	1	0.9098	1	1	0.939	0.8957	1		1	1		1		1	1	1		1
MUTYH	2652	ES	6.4:6.5:7:8:9	5	10	0	0.9913	0.3342	0.0281	1	1	1	0.9814	1	1	0.9531	0.9873	1	0.9958	0.9601	1	1	1	1	1	1	1	1	1	0.9539	1	0.9754	1	1	0.9796	0.923	1	1	1	1	0.9511	1	1	1	1	1	1	1	0.9627
MUTYH	2671	AA	6.4	5	6.5	0	0.9372	0.6085	0.1065	0.9514	0.8918	1	1	0.7608	0.877	0.8645	0.9638	0.7682	0.956	0.9682	0.942	0.9792	0.869	0.8906	0.9594	0.5703	0.9298	0.9257	0.9095	0.9292	0.947	0.8974	0.9001	1	0.8702	0.8566	0.8493	0.8484	1	0.9171	0.9279	0.9717	1	1	1	0.8402	0.8163	0.9384	1
MUTYH	2673	AA	6.2:6.3	5	6.4	0	0.7941	0.6857	0.1203	0.1737		0.1809	0.2075		0.2115	0.2254	0.1276		0.119	0.1486	0.1448	0.1425		0.1538	0.041		0.1681	0.1429	0.3773	0	0.0788	0.2096	0.1631	0.0462	0.1567		0.0593	0.1655		0.0985	0.032	0.1124	0.1951	0.0435	0.1093	0.2487	0.2714	0.0688	0.2667
MUTYH	2674	AA	6.3	5	6.4	0	0.7923	0.5919	0.1104	0.0844		0.1623	0.2789	0.3259	0.2872	0.1621	0.1683		0.0334	0.2363	0.2293	0.2165		0.1078	0.2545		0.1388	0.1129	0.5919	0.3053	0.2293	0.205	0.1458	0.1621	0.2438		0.2293	0	0.293	0.0538	0	0.1295		0.1535	0.1949	0.244		0.164	0
TOE1	2677	ES	4	3	5	0	0.9895	0.1546	0.0182	1	1	1	1	1	1	1	1	1	0.9824	1	1	1	1	1	0.975	1	1	1	1	1	1	1	1	1	1	1	1	1	1	1	1	1	1	1	1	1	1	0.9847	1
TOE1	2678	ES	2	1	3	0	0.9965	0.1096	0.0119	1	1	1	1	1	1	1	1	1	1	1	1	1	1	1	1	1	1	1	1	0.956	1	1	1	1	1	1	1	1	1	1	1	1	0.9263	1	1	1	1	1	1
TESK2	2681	AT	5			0	1	0.4365	0.0485	0.0823	0.0284	0	0.0148	0.0562	0.084	0	0.0363	0	0.0617	0.0189	0.0175	0.0171	0	0.0562	0	0.0826	0	0	0.0314	0.0575	0.0415	0.0439	0.0565	0.028	0.0672	0.0669	0.0419	0	0.0558	0	0	0	0	0.0271	0	0.0791	0.0658	0.0223	0
TESK2	2682	AT	13			0	1	0.4365	0.0485	0.9177	0.9716	1	0.9852	0.9438	0.916	1	0.9637	1	0.9383	0.9811	0.9825	0.9829	1	0.9438	1	0.9174	1	1	0.9686	0.9425	0.9585	0.9561	0.9435	0.972	0.9328	0.9331	0.9581	1	0.9442	1	1	1	1	0.9729	1	0.9209	0.9342	0.9777	1
TESK2	2683	ES	11	10	12	0	0.8586	0.2212	0.0217	1	1	0.8906	1	1	1		1	1	1	0.9694	1	1	1	1	1	1	1	0.9594	1	1	1	1	0.9135	1	1	1	0.9568	1	1	1	1	1		1	1	1	1	1	1
TESK2	2684	ES	2	1	3	0	0.9721	0.2727	0.0304	1	1	1	0.9647	1	1	1	1	1	0.978	1	0.9636	1	1	1	1	1	1	1	1	1	1	0.9744	1	1	1	1	1	1	1	1	1	1	1	1	1	1	1	0.8981	1
CCDC163P	2685	AT	6			0	1	0.1551	0.0306	0.9234	0.9042	1	0.9844	0.9645	0.9891	1	1	0.9709	0.9699	0.9945	0.9878	1	1	0.9461	1	1	0.9902	0.9944	0.9489	1	0.9357	0.9351	1	1	1	1	0.9755	1	1	0.9428	1	1	1	0.964	1	0.9728	0.8693	1	0.9598
CCDC163P	2686	AT	4.2			0	1	0.1551	0.0306	0.0766	0.0958	0	0.0156	0.0355	0.0109	0	0	0.0291	0.0301	0.0055	0.0122	0	0	0.0539	0	0	0.0098	0.0056	0.0511	0	0.0643	0.0649	0	0	0	0	0.0245	0	0	0.0572	0	0	0	0.036	0	0.0272	0.1307	0	0.0402
PRDX1	2693	ES	2.2:3:4.1	2.1	4.2	0	1	0.0146	0.0023	0.9969	0.9954	0.9968	0.9956	0.9935	0.9959	0.9976	0.9965	0.9935	0.9946	0.9943	0.9974	0.9955	0.9907	0.9984	0.9938	0.9937	0.9956	0.9953	0.9957	0.9944	0.9911	0.9956	0.9952	0.9952	0.9968	0.9944	0.9959	0.9942	0.9956	0.9964	0.9941	0.993	0.9945	0.9967	0.9946	0.9947	0.9954	0.9941	0.9939
PRDX1	2694	AD	1.2	1.1	2.1	0	1	0.037	0.0043	0.0081	0.0036	0.0085	0.0151	0.0052	0.0111	0.0197	0.0118	0.0084	0.0109	0.0162	0.0061	0.0084	0.0098	0.0076	0.0112	0.0086	0.0114	0.0174	0.0092	0.0081	0.0088	0.0084	0.008	0.0095	0.0192	0.0074	0.007	0.006	0.0086	0.0123	0.0168	0.0101	0.011	0.0035	0.0121	0.0081	0.0207	0.009	0.0076
AKR1A1	2695	AT	5.2			0	1	0.4223	0.0466	0.0758	0.0325	0.029	0.1138	0.069	0.0299	0.0382	0.0304	0.0779	0.0181	0.0813	0.0271	0.0041	0.0705	0.0562	0.042	0.034	0.0392	0.1005	0.0944	0.0332	0.0306	0.0517	0.0929	0.0161	0.0638	0.0319	0.086	0.0434	0.03	0.0224	0.0356	0.0242	0.0116	0.0543	0.0043	0.0612	0.0398	0.0507	0.0102
AKR1A1	2696	AT	10			0	1	0.4223	0.0466	0.9242	0.9675	0.971	0.8862	0.931	0.9701	0.9618	0.9696	0.9221	0.9819	0.9187	0.9729	0.9959	0.9295	0.9438	0.958	0.966	0.9608	0.8995	0.9056	0.9668	0.9694	0.9483	0.9071	0.9839	0.9362	0.9681	0.914	0.9566	0.97	0.9776	0.9644	0.9758	0.9884	0.9457	0.9957	0.9388	0.9602	0.9493	0.9898
AKR1A1	2697	ES	7	6	8	1	0.925	0.3586	0.0528	0.9335	0.9514	0.9192	0.8443	0.9527	0.939	0.8961	0.8511	0.8782	0.935	0.9257	0.9177		0.948	0.9537	0.8724	0.9154	0.9243	0.8783	0.9549	0.8773		0.9551	0.9348	0.9398	0.7816	0.9462	0.9368	0.9503	0.9307	0.9053	0.8226	0.9504	0.9132	0.9423	0.8726	0.918	0.8938	0.9264
AKR1A1	2698	ES	2	1	3	0	1	0.568	0.0736	0.3792	0.3955	0.4414	0.5088	0.4057	0.3823	0.2663	0.5174	0.5097	0.5224	0.4714	0.4431	0.4151	0.4586	0.4782	0.3655	0.4489	0.5014	0.4771	0.4282	0.5368	0.4046	0.3799	0.4754	0.4899	0.3905	0.4492	0.3894	0.4291	0.4236	0.359	0.4879	0.4877	0.4486	0.49	0.4026	0.5095	0.3385	0.5378	0.3886
NASP	2706	ES	9	8	10	0	1	0.8366	0.1592	0.6435	0.5565	0.4131	0.5394	0.3864	0.5527	0.5898	0.1526	0.4987	0.8785	0.3372	0.4115	0.1115	0.5669	0.434	0.5136	0.4914	0.1892	0.145	0.4748	0.6598	0.39	0.5798	0.522	0.6277	0.3188	0.4703	0.5014	0.1682	0.5388	0.5492	0.3016	0.2165	0.606	0.1958	0.2419	0.2438	0.3786	0.1371	0.2595
NASP	2708	ES	7.2	6	8	0	1	0.0106	0.001	1	1	1	1	1	1	1	1	1	1	1	1	1	1	1	1	1	1	1	1	1	1	1	1	1	1	1	1	1	1	0.9917	1	1	1	1	1	1	1	1	1
NASP	2709	AA	7.1	6	7.2	0	1	0.2371	0.0179	0.0049	0	0	0	0.019	0	0	0	0	0.0033	0.0019	0	0	0.0098	0	0	0	0.0035	0	0	0	0	0	0	0	0.0337	0	0	0	0	0	0	0	0	0	0	0	0	0.0019	0
NASP	2717	ES	00:06:07.200000	3	8	0	0.9791	0.6512	0.0568	1	0.8413	0.9261	1	0.8883	1	1	0.941	0.8388	0.9413	0.9308	1	1	1	1	0.9648	1	1	1	0.9403	1	1	1	0.9496	1	0.9697	1	1	1	1	0.9152	0.812	0.9157		0.9029	1	0.8852	1	1	0.928
NASP	2719	ES	00:06:07.200000	3	8	0	1	0.3692	0.0163	1	0.9893	0.9923	1	0.9914	1	1	0.9951	0.9899	0.9969	0.9926	1	1	1	1	0.9978	1	1	1	0.9935	1	1	1	0.9937	1	0.9967	1	1	1	1	0.9919	0.9819	0.9924	1	0.9911	1	0.9819	1	1	0.99
NASP	2729	ES	5:6:7.2:8:9	3	10	0	0.9808	0.8344	0.116	1	1	1	1	1	1	1	1	0.691	1	0.7181	1	1	0.7682	1	0.8315	1	0.8346	0.2937	0.7454	1	1	0.9365	1	1	1	0.7345	0.9337	0.564	0.7567	1	1	1		0.6965	1	1	0.7383	0.8463	1
NASP	2731	ES	6:7.2:8:9	3	10	0	1	0.1972	0.017	1	1	1	1	1	1	1	1	0.9775	1	0.9628	1	1	0.9852	1	0.9879	1	0.9759	0.8028	0.9669	1	1	0.9942	1	1	1	0.9482	0.9956	0.9014	0.9689	1	1	1	1	0.9659	1	1	0.9676	0.9817	1
NASP	2742	ES	5:6:7.2:8	3	10	0	0.9773	0.5096	0.0626	1	1	1	1	1	1	1	1	0.8043	1	0.9052	1	1	0.8145	1	0.9075	1	0.9737	0.8307	0.8682	1	1	0.9528	1	1	1	0.9013	0.96	0.9089	0.8208	1	1	1		0.9481	1	1	0.9078	0.9839	1
NASP	2744	ES	00:07:02.200000	3	10	0	1	0.0551	0.0063	1	1	1	1	1	1	1	1	0.9874	1	0.9896	1	1	0.9887	1	0.9938	1	0.9966	0.9791	0.9847	1	1	0.9957	1	1	1	0.9833	0.9974	0.9864	0.9785	1	1	1	1	0.9955	1	1	0.9903	0.9983	1
NASP	2751	ES	04:05:00	3	6	0	0.9983	0.1351	0.0129	0	0.0107	0	0.0181	0.0142	0	0	0	0	0.0048	0	0.0029	0	0	0	0	0	0.0028	0.0037	0	0.0027	0	0	0.005	0	0.0052	0.0105	0	0	0	0	0	0	0.0071	0	0.0069	0	0	0	0
NASP	2752	ES	5	3	6	0	1	0.6338	0.0558	0.0386	0.0656	0.1025	0.122	0.0739	0.0783	0.088	0.0847	0.0573	0.0569	0.1083	0.1356	0.1288	0.0564	0.0949	0.0681	0.0961	0.134	0.1128	0.106	0.1212	0.046	0.094	0.1295	0.093	0.115	0.152	0.0718	0.1351	0.1068	0.0954	0.0886	0.0919	0.0106	0.0912	0.0572	0.1501	0.1016	0.1118	0.1297
NASP	2753	ES	4	3	6	0	0.9983	0.3438	0.0253	0.0527	0.0075	0	0.0147	0.0042	0.015	0	0	0.0096	0.0076	0.0045	0.0024	0	0	0.0071	0.0077	0	0.002	0.0026	0.0125	0.002	0	0.029	0.0044	0	0.0041	0.0074	0.0098	0	0	0	0	0	0	0.0053	0.0045	0	0	0.002	0
NASP	2754	ES	2	1	3	0	1	0.7519	0.1138	0.372	0.3264	0.273	0.3528	0.3586	0.3213	0.2349	0.1824	0.466	0.3349	0.2878	0.323	0.427	0.3102	0.477	0.185	0.4062	0.3669	0.2605	0.4242	0.3388	0.2548	0.2855	0.3225	0.3696	0.3418	0.3905	0.4206	0.5002	0.3493	0.374	0.1963	0.2419	0.3449	0.4173	0.3298	0.434	0.4886	0.3479	0.4654
GPBP1L1	2769	ES	2	1	3	0	0.9913	0.5556	0.079	0.8199	0.7183	0.8386	0.8134	0.906	0.7486	0.7723	0.6826	0.7858	0.9089	0.7776	0.8234	0.746	0.8823	0.8457	0.8067	0.736	0.8612	0.854	0.8332	0.688	0.8562	0.7157	0.8018	0.7373	0.8162	0.8014	0.7965	0.8282	0.8106	0.7343	0.7456	0.7988	0.8778	0.7739	0.8854	0.8367	0.7258	0.9749	0.8425
IPP	2771	AT	9.2			0	1	0.4049	0.0509	0.8811	0.8934	0.8321	0.8589	0.8675	0.8826	0.9048	0.8836	0.8789	0.8658	0.9378	0.8471	0.9089	0.8959	0.9093	0.861	0.9099	0.8494	0.9138	0.9392	0.8561	0.9036	0.9014	0.9282	0.8954	0.8395	0.935	0.8917	0.938	0.9233	0.8573	0.8706	0.9106	0.832	0.9099	0.9041	0.8923	0.881	0.9008	0.7153
IPP	2772	AT	10			0	1	0.4049	0.0509	0.1189	0.1066	0.1679	0.1411	0.1325	0.1174	0.0952	0.1164	0.1211	0.1342	0.0622	0.1529	0.0911	0.1041	0.0907	0.139	0.0901	0.1506	0.0862	0.0608	0.1439	0.0964	0.0986	0.0718	0.1046	0.1605	0.065	0.1083	0.062	0.0767	0.1427	0.1294	0.0894	0.168	0.0901	0.0959	0.1077	0.119	0.0992	0.2847
MAST2	2773	AA	29.1	28	29.2	0	1	0.0198	0.0017	1	1	1	0.9955	1	1	1	1	1	1	1	1	1	1	1	1	1	1	1	0.9855	1	1	1	1	1	1	1	1	1	1	1	1	1	1	1	1	1	1	1	1
MAST2	2774	RI	25.2	25.1	25.3	0	0.9983	0	0	1	1	1	1	1	1	1	1	1	1	1	1	1	1	1	1	1	1	1	1	1	1	1	1	1	1	1	1	1	1	1	1	1	1	1	1	1	1	1	1
MAST2	2775	ES	10	9	11	0	0.9948	0.1842	0.0187	1	0.9796	1	1	0.9321	1	1	1	1	0.9897	1	1	1	0.9719	0.979	1	1	0.9726	1	1	0.9813	1	1	1	0.9631	0.9868	1	0.9889	1	1	0.9457	1	1	0.9389	0.9571	1	1	1	1	0.9526
PIK3R3	2776	AP	2.1			0	0.9965	0.7108	0.0597	0	0.026	0.0408	0.0542	0.0324	0	0	0.038	0	0.0406	0.0546	0.0214	0.0656	0.0846	0.0136	0.235	0.2694	0.1356	0.0262	0.0631	0.0156	0.0588	0.0834	0	0.0397	0.0214	0.0746	0.0194	0	0.0547	0.0494	0	0.0288	0.0993	0.0481	0	0.0458	0.0985	0.0435	0.006
PIK3R3	2777	AP	3.1			0	0.9965	0.7108	0.0614	1	0.974	0.9592	0.9383	0.9676	1	1	0.962	1	0.9554	0.9455	0.9786	0.9344	0.9154	0.9864	0.765	0.7306	0.8644	0.9738	0.9369	0.9844	0.9412	0.9166	1	0.9603	0.9744	0.9254	0.9806	1	0.9453	0.9506	1	0.9712	0.9007	0.9519	1	0.9542	0.9015	0.9565	0.994
PIK3R3	2778	AP	1			0	0.9965	0.1035	0.0084	0	0	0	0.0075	0	0	0	0	0	0.004	0	0	0	0	0	0	0	0	0	0	0	0	0	0	0	0.0042	0	0	0	0	0	0	0	0	0	0	0	0	0	0
PIK3R3	2779	ES	10	9	11	0	0.993	0.4295	0.034	0.9402	0.9706	1	1	1	1	1	1	1	1	1	0.9809	0.9799	1	1	1	1	1	0.9794	0.9654	0.9905	1	0.8842	1	1	1	1	0.9802	1	1	1	1	1	0.9693	1	1	1	0.8328	1	1
POMGNT1	2781	AP	2			0	0.9965	0.9918	0.1432	0.8959	0.8882	0.6088	0.7216	0.8602	0.9451	0.7817	0.9705	0.9362	0.9226	0.9038	0.6924	0.8755	0.8725	0.882	0.9918	0.6387	0.9467	0.8175	0.8309	0.8131	0.482	0.62	0.7347	0.8303	0.9018	0.6499	0.6111	0.7725	0.7559	0.9038	0.8677	0.8476	0.9246	0.9351	0.6536	0.9055	0.7123	0.6415	0.8035
POMGNT1	2782	AP	4			0	0.9965	0.6072	0.0502	0	0.0121	0	0	0	0	0	0	0.0129	0	0.0045	0	0.0092	0.0149	0	0	0	0	0.0052	0.0082	0	0.0102	0.0133	0	0.005	0.0033	0	0.0209	0	0	0	0	0	0	0.0084	0	0	0	0	0
POMGNT1	2783	AP	1			0	0.9965	0.745	0.1321	0.1041	0.0997	0.3912	0.2784	0.1398	0.0549	0.2183	0.0295	0.0509	0.0774	0.0917	0.3076	0.1153	0.1126	0.118	0.0082	0.3613	0.0533	0.1773	0.1609	0.1869	0.5078	0.3667	0.2653	0.1647	0.0949	0.3501	0.368	0.2275	0.2441	0.0962	0.1323	0.1524	0.0754	0.0565	0.3464	0.0945	0.2877	0.3585	0.1965
POMGNT1	2784	RI	22.2	22.1	22.3	0	1	0.2086	0.0257	1	0.9964	0.9794	0.9335	0.9592	0.9903	0.9916	0.9914	0.9814	0.917	0.9759	0.9792	0.9958	0.9918	1	0.916	0.9834	0.9778	0.9912	0.9908	0.9555	1	1	0.9747	0.9978	0.9814	0.9802	0.9915	0.9738	0.9929	0.9855	0.9928	1	0.9893	0.9911	0.9963	0.9843	0.9893	0.9912	0.9932
POMGNT1	2785	AD	21.2	21.1	22.1	0	1	0.0745	0.0061	1	1	1	1	1	0.997	1	1	1	1	1	1	1	1	1	1	1	1	1	1	1	1	1	1	1	1	1	1	1	1	0.9942	1	1	1	1	1	1	1	0.9964	1
POMGNT1	2786	RI	12.4	12.3	12.5	0	1	0.6259	0.0712	0.0634	0.0229	0.0173	0.0975	0.0326	0.0123	0.0263	0.0287	0.0278	0.0195	0.0881	0.017	0.0112	0.0605	0.0185	0.0066	0.013	0.0204	0.0263	0.0484	0.0349	0.0263	0.0675	0.0539	0.0133	0.0224	0.0228	0.0567	0.0244	0.0101	0.0075	0.0704	0.0233	0.0132	0.0135	0.0074	0.0337	0.0474	0.0318	0.0113
POMGNT1	2787	RI	12.2	12.1	12.3	0	1	0.6976	0.0811	0.0831	0.0319	0.0465	0.1172	0.0432	0.012	0.0611	0.0134	0.0392	0.0223	0.1001	0.016	0.0061	0.0779	0.0318	0.0133	0.0398	0.0255	0.0263	0.0574	0.0154	0.0242	0.063	0.0544	0.0119	0.0315	0.0597	0.0531	0.0278	0.0035	0.0141	0.0508	0.0266	0	0.0118	0.0036	0.0585	0.0658	0.0254	0.0095
POMGNT1	2788	ES	9	8	10	0	0.9983	0.0924	0.0081	1	1	1	0.996	1	1	1	1	0.9885	0.9985	0.9957	1	1	1	0.9894	1	1	1	0.9965	1	1	1	1	0.9832	1	1	1	1	1	1	1	1	1	1	1	1	1	1	0.9942	1
RAD54L	2789	RI	1.2	1.1	1.3	0	0.8534	0.4037	0.0182	1	1	1	1	1	1	1	1	1	1	1	1	1	1	1	1	1	1	1	1	1	1	1	1	1	1	1	1		1	1	1	1	1		1	1	1	1
NSUN4	2791	AP	2.1			0	1	0.0768	0.0096	0	0	0	0.0216	0	0.0156	0	0.0281	0	0.0128	0.0133	0	0	0	0	0.047	0	0	0	0.0128	0	0	0	0	0.0678	0	0	0	0	0	0	0	0	0	0	0	0	0	0	0.0406
NSUN4	2792	AP	1			0	1	0.0768	0.0096	1	1	1	0.9784	1	0.9844	1	0.9719	1	0.9872	0.9867	1	1	1	1	0.953	1	1	1	0.9872	1	1	1	1	0.9322	1	1	1	1	1	1	1	1	1	1	1	1	1	1	0.9594
NSUN4	2793	ES	4	3	5	0	0.9983	0.2452	0.0424	0.9866	0.9526	0.9475	0.9419	1	0.9934	0.9631	0.9709	0.9514	0.9084	0.9415	0.9746	0.9874	0.914	1	1	0.8579	0.9825	0.9608	0.9876	1	0.9837	0.9748	1	0.9895	0.9571	0.9674	0.994	0.9198	0.9434	0.967	0.9314	0.9456	1	1	0.89	0.9402	0.8416	0.9342	0.9228
NSUN4	2794	ES	2.2	1	3	0	0.9442	1	0.1525	0.1391	0.2345	0.0665	0.3144	0.1374	0.0853	0.3085	0.294	0.6675	0.128	0.1227	0.153	0.3933	0.3258	0.1254	0.4867	0.4295	0.1686	0.148	0.1029	0.238	0.2006	0.1921	0.1032	0.0508	0.1863	0.1003	0.1268	0.1957	0.2112	0.0271	0.3085	0.0959	0.187	0.2735	0.1507	0.152	0.1224	0.3437	0.4903
MKNK1	2798	AP	2.1			0	0.9686	0.7446	0.1133	0.7306	0.6109	0.6272	0.5824	0.4675	0.6799	0.418	0.7055	0.7033	0.7447	0.6029	0.5824	0.6407	0.6371	0.4038	0.6436	0.6639	0.7371	0.6417	0.671	0.6669	0.533	0.5865	0.6996	0.6125	0.7925	0.5872	0.639	0.6458	0.7145	0.5655	0.7108	0.4281	0.6313	0.6589	0.7585	0.7235	0.8528	0.7559	0.4969
MKNK1	2800	AP	1			0	0.9686	0.7446	0.1133	0.2694	0.3891	0.3728	0.4176	0.5325	0.3201	0.582	0.2945	0.2967	0.2553	0.3971	0.4176	0.3593	0.3629	0.5962	0.3564	0.3361	0.2629	0.3583	0.329	0.3331	0.467	0.4135	0.3004	0.3875	0.2075	0.4128	0.361	0.3542	0.2855	0.4345	0.2892	0.5719	0.3687	0.3411	0.2415	0.2765	0.1472	0.2441	0.5031
MKNK1	2802	AT	9.2			0	1	0.5435	0.0509	0.1214	0.0545	0.0533	0.0548	0.102	0.0295	0.0514	0.0426	0.1277	0.0526	0.1126	0.0422	0.0212	0.0869	0.0544	0.0548	0.0372	0.0482	0.0427	0.1024	0.0551	0.0319	0.0619	0.0735	0.0311	0.0601	0.0775	0.0598	0.0806	0.0477	0.0425	0.0852	0.0521	0.0368	0.0661	0.0517	0.0482	0.0818	0.0735	0.0344
MKNK1	2804	AT	7.2			0	1	0.1767	0.0277	0.029	0.0346	0.0649	0.0183	0.0477	0.0675	0.0631	0.1004	0.0304	0.0581	0.0281	0.0222	0.0618	0.0291	0.0445	0.0488	0.0114	0.0761	0.0324	0.0317	0.035	0.0452	0.0738	0.0602	0.0843	0.0304	0	0.0475	0.0129	0.1017	0.0314	0.1507	0.0698	0.0452	0.0406	0.088	0.0688	0.0431	0.1021	0.0308
MKNK1	2806	AT	17			0	1	0.5959	0.0598	0.8496	0.9109	0.8818	0.9269	0.8503	0.903	0.8855	0.8571	0.8419	0.8893	0.8593	0.9356	0.917	0.884	0.9011	0.8965	0.9514	0.8758	0.925	0.8659	0.9099	0.9229	0.8643	0.8662	0.8846	0.9095	0.9225	0.8927	0.9064	0.8507	0.9261	0.7641	0.8781	0.9181	0.8933	0.8604	0.883	0.8751	0.8244	0.9348
MKNK1	2807	ES	16	15.2	17	0	0.9965	0.6	0.0882	0.8273	0.8361	0.737	0.7273	0.8085	0.747	0.6866	0.7273	0.7073	0.8401	0.7532	0.8047	0.7568	0.7619	0.9348	0.7153	0.6875	0.7862	0.7164	0.65	0.7692	0.7143	0.7273	0.6712	0.735	0.6516	0.76	0.7435	0.6087	0.8188	0.8868	0.7143	0.6897	0.9053	0.8537	0.7718	0.7204	0.6667	0.7526	0.7453
MKNK1	2808	AA	15.1	14	15.2	0	0.9913	0.3302	0.0477	0.0616	0.0475	0.0611	0.0561	0.074	0.0295	0.0257	0.0205	0.0395	0.0476	0.0459	0.0564	0.0246	0.1121	0.0325	0.0442	0.0417	0.0257	0.1245	0.0824	0	0	0.0507	0.0462	0.0293	0.0296	0	0.0429	0	0.0455	0.0519	0	0	0	0.0819	0	0.0841	0	0.0226	0
MKNK1	2809	ES	11	10	12	0	1	0.6519	0.075	0.1722	0.065	0.0629	0.0885	0.1006	0.1236	0.0725	0.0725	0.1725	0.1195	0.1258	0.0905	0.0813	0.1408	0.1672	0.1914	0.0989	0.12	0.1725	0.1394	0.0985	0.0788	0.1221	0.1476	0.1018	0.1179	0.0594	0.1466	0.2943	0.1489	0.1881	0.0725	0.1038	0.1085	0.1001	0.0335	0.0788	0.1137	0.0878	0.1044
MKNK1	2810	ES	9.1	8	10	0	0.9965	0.3771	0.0379	0.9884	0.9808	0.9836	0.9927	0.9217	1	1	0.9841	0.9614	0.9755	0.9439	0.9797	0.9691	0.9781	0.9125	1	1	0.9933	0.9127	0.9524	0.9869	0.9794	0.9737	0.9851	0.961	0.9628	0.9403	0.9798	0.9607	0.9277	0.9556	1	1	0.9668	0.942	1	0.9871	0.9257	0.9405	0.9875
MKNK1	2812	ES	7.1	5	8	0	0.9965	0.1676	0.0206	0.9625	1	0.9866	0.9516	0.9557	0.9689	0.9661	0.994	0.9703	0.9876	0.978	0.994	1	0.9809	1	0.991	0.9576	0.9901	0.9833	0.96	0.9894	0.9537	0.9808	1	0.9802	0.982	0.9795	0.9793	1	1	1	1	1	1	0.953	1	0.9845	1	0.9799	0.9489
MKNK1	2813	ES	6	5	7.1	0	0.9965	0.6897	0.0428	0.0134	0	0	0.0072	0	0	0	0.0065	0	0.0186	0.0194	0.0041	0.0047	0	0	0.0064	0	0.0035	0	0.0372	0	0.011	0.0047	0.0237	0.0041	0.0037	0	0.0071	0	0	0.0129	0	0	0.0319	0	0.0107	0.0127	0.069	0.0085	0.0141
MKNK1	2814	ES	4	3	5	0	0.9913	0.7487	0.1127	0.174	0.1414	0.0807	0.2957	0.3995	0.1519	0.0653	0.0762	0.1533	0.132	0.2265	0.2248	0.072	0.3177	0.3018	0.2588	0.0624	0.1127	0.129	0.2775	0.2496	0.101	0.1121	0.138	0.1453	0.1963	0.157	0.1322	0.1625	0.0822	0.1486	0.0822	0.1344	0.055	0.2759	0.0652	0.1793	0.1664	0.0932	0.1277
MKNK1	2815	AD	2.2	2.1	3	0	0.9651	0.8692	0.1292	0.4376	0.6088	0.5786	0.6048	0.2313	0.5503	0.7303	0.6486	0.6505	0.4838	0.6412	0.5593	0.5752	0.6573	0.6123	0.5154	0.6435	0.646	0.5619	0.5647	0.6007	0.6505	0.5229	0.478	0.6492	0.4744	0.3259	0.6177	0.4528	0.6606	0.7569	0.3367	0.6377	0.4583	0.4809	0.6732	0.5109	0.1308	0.557	0.5443
MOB3C	2816	AP	1			0	0.9983	0.9939	0.1705	0.3431	0.7598	0.8937	0.733	0.7011	0.9493	0.812	0.8871	0.7975	0.8682	0.7614	0.8888	0.943	0.7602	0.8615	0.8724	0.8603	0.8455	0.8524	0.6813	0.7963	0.9553	0.8605	0.7138	0.9023	0.7519	0.749	0.7262	0.9647	0.9504	0.9163	0.9685	0.9639	0.9736	0.7717	0.9485	0.9645	0.7738	0.8841	0.9395
MOB3C	2817	AP	2.1			0	0.9983	0.9939	0.1705	0.6569	0.2402	0.1063	0.267	0.2989	0.0507	0.188	0.1129	0.2025	0.1318	0.2386	0.1112	0.057	0.2398	0.1385	0.1276	0.1397	0.1545	0.1476	0.3187	0.2037	0.0447	0.1395	0.2862	0.0977	0.2481	0.251	0.2738	0.0353	0.0496	0.0837	0.0315	0.0361	0.0264	0.2283	0.0515	0.0355	0.2262	0.1159	0.0605
MOB3C	2818	RI	2.2	2.1	2.3	0	0.9895	0.4772	0.0557	1	1	1	1	1	1	1	1	1	1	1	1	1	1	1	1	1	1	1	1	1	1	1	1	1	1	1	1		1	1	1	1	1	1	1	1		1	1
ATPAF1	2819	AP	1			0	0.9965	0.7384	0.0687	0.986	1	1	0.9899	0.9652	1	1	1	1	1	0.9923	1	1	1	0.9649	1	1	1	1	1	1	0.9832	1	1	1	1	1	1	1	1	1	1	1	1	1	1	1	1	1	1
ATPAF1	2820	AP	2			0	0.9965	0.7384	0.0687	0.014	0	0	0.0101	0.0348	0	0	0	0	0	0.0077	0	0	0	0.0351	0	0	0	0	0	0	0.0168	0	0	0	0	0	0	0	0	0	0	0	0	0	0	0	0	0	0
ATPAF1	2821	ES	09:10:00	8	11	0	1	0.2116	0.0323	0.9327	0.9137	0.9814	0.9268	0.9473	0.9267	0.9128	0.9691	0.9577	0.9717	0.9689	0.9693	0.9299	0.9247	0.928	0.9216	0.898	0.922	0.9676	0.9168	0.9218	0.9155	0.9229	0.9031	0.9279	0.948	0.8753	0.9408	0.9125	0.929	0.9358	0.9525	0.9239	0.9295	0.9125	0.9479	0.9794	0.9728	0.955	0.9448
ATPAF1	2822	ES	4	3	5	0	0.9372	0.7108	0.0809	0.0447	0.0701	0	0.0214	0.0193	0	0.0151	0.0087	0.0656	0.0278	0.0173	0	0	0	0	0.0095	0	0.0147	0.0101	0.0452	0	0.0193	0.0072	0.0895	0.0147	0.009		0.0077	0.0394	0	0.0173	0	0	0	0.0281	0	0.0223	0	0.0579	0.024
EFCAB14	2823	AT	13			0	1	0.3194	0.0518	0.1644	0.1659	0.1734	0.1724	0.1585	0.2541	0.2512	0.2075	0.1307	0.3021	0.1439	0.1247	0.1096	0.1196	0.1507	0.333	0.1197	0.2496	0.2013	0.225	0.2028	0.2041	0.2416	0.1289	0.1734	0.21	0.1195	0.1777	0.2691	0.2307	0.2489	0.2263	0.1505	0.1485	0.2107	0.231	0.2682	0.1947	0.1617	0.1279
EFCAB14	2824	AT	11			0	1	0.3194	0.0518	0.8356	0.8341	0.8266	0.8276	0.8415	0.7459	0.7488	0.7925	0.8693	0.6979	0.8561	0.8753	0.8904	0.8804	0.8493	0.667	0.8803	0.7504	0.7987	0.775	0.7972	0.7959	0.7584	0.8711	0.8266	0.79	0.8805	0.8223	0.7309	0.7693	0.7511	0.7737	0.8495	0.8515	0.7893	0.769	0.7318	0.8053	0.8383	0.8721
EFCAB14	2825	ES	7	6	8	0	1	0.7609	0.1196	0.627	0.5691	0.6896	0.7964	0.7683	0.44	0.47	0.8349	0.74	0.8172	0.6724	0.6996	0.6778	0.734	0.7631	0.805	0.4332	0.6892	0.5089	0.772	0.8469	0.7378	0.5426	0.4985	0.5449	0.7706	0.5266	0.6918	0.6445	0.7258	0.44	0.7646	0.5504	0.5766	0.8358	0.7633	0.6922	0.9559	0.7874	0.5138
CYP4B1	2829	AP	1			0	0.9127	0.5432	0.0369	0.9955	0.9882	1	1	0.9827	1	1	1	1	0.988	1	1	0.9976	0.9474	1	1	1	1	1	0.9961	1	1	1	1	1	0.9916	1	0.9915	0.9591	1	1		1	1	0.9911	1		0.9616	1	0.9979
CYP4B1	2830	AP	3.1			0	0.9127	0.5432	0.0369	0.0045	0.0118	0	0	0.0173	0	0	0	0	0.012	0	0	0.0024	0.0526	0	0	0	0	0	0.0039	0	0	0	0	0	0.0084	0	0.0085	0.0409	0	0		0	0	0.0089	0		0.0384	0	0.0021
CYP4B1	2831	AT	9.2			0	0.9878	0.3131	0.0317	0.0153	0.005	0	0	0.0113	0	0	0	0.0206	0.0033	0.0398	0.0071	0.001	0.03	0.2939	0	0	0	0	0.004	0.0022	0	0.0031	0	0	0	0.008	0.0037	0	0.0025	0	0	0	0	0.0147	0	0	0.0037	0.0041	0.0001
CYP4B1	2832	AT	13			0	0.9878	0.3131	0.0317	0.9847	0.995	1	1	0.9887	1	1	1	0.9794	0.9967	0.9602	0.9929	0.999	0.97	0.706	1	1	1	1	0.996	0.9978	1	0.9969	1	1	1	0.992	0.9963	1	0.9975	1	1	1	1	0.9853	1	1	0.9963	0.9959	0.9999
CYP4B1	2836	AA	7.1:7.2	6	7.3	0	0.8813	0.8148	0.0826	1	1	1	1	0.9878	1	1		1	1	1	0.9614	1	1		1	1	1	0.9249	0.9825	0.9903	1	1	0.9752	0.9546	1	0.9738	0.9982	1	1	0.951		1	1	0.931	1		0.9746	0.9862	0.9978
CYP4B1	2837	AA	7.2	6	7.3	0	0.7696	0.9786	0.1232	1	1	1		0.9709	1	1		1	1	1	0.8557	1			1			0.8647	0.946	0.9644		1	0.9044	0.885	1	0.9581	0.9942		1	0.902			1	0.796			0.9325	0.9271	0.9934
CYP4B1	2838	AA	7.1	6	7.2	0	0.8063	0.6328	0.0695	0.82	0.7685	0.7527	0.7632	0.7095	0.8131	0.7586		0.7437	0.7898	0.7074	0.8085	0.7742	0.8713		0.8131		0.7632	0.6592	0.7636	0.7907		0.7816	0.8073	0.7339	0.7132	0.62	0.7634	0.8627	0.7614	0.6803		0.9141	0.8218	0.7767	0.6595		0.7364	0.8503	0.7573
CYP4B1	2840	ES	3.2	2	5	0	0.8604	0.2321	0.0217	0.9929	0.9809	1	0.9026	0.9746	1	1		0.9137	0.9925	0.8792	0.9593	0.9609	1	1	1		1	1	0.9678	0.9895	1	1	0.9742	1	1	1	0.9786	1	0.9894	1		0.9184	1	0.9962	1		1	1	0.9859
CYP4B1	2842	ES	00:02:03.200000	1	5	0	0.918	0.0572	0.0035	0.9912	1	1	1	0.9956	1	1	1	1	1	1	0.9977	1	1	1	1	1	1	1	1	1	1	1	1	1	1	1	0.9987	1	1	1		1	1	1	1		1	1	0.9996
CYP4X1	2888	AP	1			0	0.822	1	0.0802	0	0.0973		0	0.1523	0		0	0	0	0	0	0	0	0		0		0.0135	0.3619	0	0	0		0	0		0		0	0		0		0.2443	0		0	0	0
CYP4X1	2889	AP	2			0	0.822	1	0.0802	1	0.9027		1	0.8477	1		1	1	1	1	1	1	1	1		1		0.9865	0.6381	1	1	1		1	1		1		1	1		1		0.7557	1		1	1	1
PDZK1IP1	2893	AP	2.1			0	0.9651	0.1436	0.0062	1	1	1	1	1	1	1	1	1	0.9995	0.9988	0.9997	0.9992	1	1	1	1	1	0.9993	0.9975	1	1	0.9991	1	1	1	1	0.9992	1	1	0.9988	1	0.9992	1	1	1	1	1	1	0.9991
PDZK1IP1	2894	AP	1			0	0.9651	0.1436	0.0062	0	0	0	0	0	0	0	0	0	0.0005	0.0012	0.0003	0.0008	0	0	0	0	0	0.0007	0.0025	0	0	0.0009	0	0	0	0	0.0008	0	0	0.0012	0	0.0008	0	0	0	0	0	0	0.0009
CMPK1	2905	AT	7			0	1	0.0505	0.0045	0.9998	0.9997	0.9995	0.9989	0.9986	0.9991	1	0.9996	1	0.9996	0.9992	0.9992	0.9992	0.9975	1	0.9995	1	0.9996	0.9999	0.9995	0.9982	0.9985	0.9993	0.9998	0.9997	0.9992	0.9986	0.9998	0.9985	0.9987	0.9988	0.9993	0.9993	0.9998	0.9997	0.9985	0.9995	1	0.9997	0.9987
CMPK1	2906	AT	2			0	1	0.0505	0.0045	0.0002	0.0003	0.0005	0.0011	0.0014	0.0009	0	0.0004	0	0.0004	0.0008	0.0008	0.0008	0.0025	0	0.0005	0	0.0004	0.0001	0.0005	0.0018	0.0015	0.0007	0.0002	0.0003	0.0008	0.0014	0.0002	0.0015	0.0013	0.0012	0.0007	0.0007	0.0002	0.0003	0.0015	0.0005	0	0.0003	0.0013
CMPK1	2907	ES	5	4	6	0	1	0.0604	0.0067	0.9968	0.9933	0.9876	0.9954	0.9937	0.9891	0.9894	0.9971	0.989	0.9962	0.9947	0.9935	0.9947	0.9893	0.9894	0.9955	0.9953	0.9939	0.9919	0.994	0.9981	0.9984	0.9939	0.988	0.992	0.9891	0.9917	0.9959	0.9789	0.9911	0.9838	0.9925	0.9954	0.9963	0.9912	0.9908	0.9937	1	0.9893	0.997
CMPK1	2908	ES	3	1	4	0	1	0.036	0.0037	0.998	0.9938	1	0.9985	1	0.997	1	0.9967	0.9946	0.9957	0.9991	0.9972	0.9961	1	1	0.9971	0.9932	0.997	0.9977	0.9982	1	1	0.9976	0.9961	0.999	0.9941	0.9931	0.9955	0.996	0.9971	1	1	0.9984	0.9952	0.9899	0.9977	1	1	0.9989	0.9964
SPATA6	2916	AP	1			0	0.7941	0.9338	0.1019	0.9413	1	1	0.9632	1	1	1	1	1	0.9147	1	1	1	0.9274	0.8845		1	0.8646	1	1	1	1	0.9623	0.8646	1	0.947	1	1		1	1	1	1	0.9452	0.8925	1	1		1	1
SPATA6	2917	AP	7			0	0.7941	0.9338	0.1019	0.0587	0	0	0.0368	0	0	0	0	0	0.0853	0	0	0	0.0726	0.1155		0	0.1354	0	0	0	0	0.0377	0.1354	0	0.053	0	0		0	0	0	0	0.0548	0.1075	0	0		0	0
SPATA6	2920	AD	13.2	13.1	14	0	0.8953	0.8782	0.1277	0.7269	0.6247	0.6479	0.7613	0.3267	0.7689		0.7837	0.6743	0.7065	0.6306	0.7871	0.8255	0.7249	0.5837		1	0.8381	0.6909	0.6996	0.6152	0.8191	0.8218	0.9119	0.8863	0.7056	0.6937	0.8671		0.649	1	0.7082	0.8359	0.5641	0.6331	0.5874	0.7574	0.6402		0.837
SPATA6	2923	ES	4	3	5.2	0	0.7976	0.2281	0.0324	1	1	1	1	1	0.9438	1	1	1	0.9118	1	1	1	1	1		0.859	1	1	1	1	1	1	1	0.9626	1	1	1		1	1		1	1	1	1	1	1	1	1
FAF1	2936	AP	9			0	0.8325	0.8891	0.0975	0.0306	0	0	0	0	0	0	0	0	0.0066	0	0	0	0	0	0	0	0	0	0	0.0571	0	0	0	0	0.0134	0	0	0	0.0499	0.0264	0	0	0	0	0	0	0	0	0
FAF1	2937	AP	7.1			0	0.8325	0.5786	0.059	0	0	0	0	0	0	0	0	0	0	0	0.0235	0	0	0	0	0.0928	0	0	0.5786	0	0	0.0119	0	0	0	0	0	0	0	0	0	0	0	0.0552	0	0	0	0	0.0413
FAF1	2938	AP	1.1			0	0.8325	1	0.1272	0.9694	1	1	1	1	1	1	1	1	0.9934	1	0.9765	1	1	1	1	0.9072	1	1	0.4214	0.9429	1	0.9881	1	1	0.9866	1	1	1	0.9501	0.9736	1	1	1	0.9448	1	1	1	1	0.9587
FAF1	2939	ES	20	19	21	0	1	0.5928	0.05	0.0055	0.0019	0	0	0.0071	0.0015	0	0	0.0036	0.0016	0.0022	0.0009	0	0	0	0.006	0.0107	0.0017	0.0011	0.008	0	0.0029	0	0.0071	0	0.0016	0.0069	0	0	0	0	0	0	0	0	0	0	0	0.0012	0
FAF1	2940	RI	1.2	1.1	1.3	0	0.9651	0.3213	0.0559	1	1	1	0.9729	1	0.9536	1	0.9491	1	0.989	0.9037	0.8915	0.9595	1	1	1	0.8719	0.963	0.9808	1	1	1	1	1	1	0.8825	1	0.9654	1	1	0.9566	1	1	1	1	0.9633	0.9391	1	0.9694	1
CDKN2C	2941	AP	1			0	0.9407	0.4707	0.0619	0	0	0	0		0	0	0	0	0.0206	0	0	0	0	0.3307	0	0	0	0.0881	0	0	0	0	0.0937	0.0659	0	0	0	0	0	0	0	0		0	0	0	0	0	0
CDKN2C	2942	AP	3.1			0	0.9407	0.4707	0.0619	1	1	1	1		1	1	1	1	0.9794	1	1	1	1	0.6693	1	1	1	0.9119	1	1	1	1	0.9063	0.9341	1	1	1	1	1	1	1	1		1	1	1	1	1	1
TTC39A	2944	AP	1			0	0.9442	0.777	0.1339	0.3638	0.2995	0.5968	0.2351		0.3621	0.1896	0.1008	0.1196	0.1362	0.1292	0.1413	0.0367	0.212			0.1365	0.3722	0.1653	0.2965	0.2448	0.3697	0.5928	0.323	0.2017	0.1675	0.0566	0.2929	0.2589	0.32	0.1604	0.2727	0.1581	0.1174	0.0669	0.263	0.6173	0.2794	0.1212	0.2327
TTC39A	2946	AP	3			0	0.9442	0.7714	0.1362	0.3638	0.2534	0.3316	0.4367		0.2848	0.3965	0.4703	0.279	0.2484	0.4737	0.3633	0.4157	0.2826			0.3867	0.428	0.2373	0.4058	0.3264	0.1946	0.1482	0.4845	0.3169	0.342	0.566	0.303	0.4315	0.2462	0.3849	0.2727	0.3478	0.4863	0.351	0.2032	0.0882	0.1862	0.3635	0.2874
TTC39A	2947	AP	4			0	0.9442	0.7402	0.109	0.1976	0.3393	0	0.1595		0.1236	0.1473	0.1276	0.3155	0.2131	0.1636	0.2492	0.267	0.2013			0.1296	0.053	0.3421	0.1186	0.0775	0.1109	0.1173	0.0767	0.1094	0.2452	0.215	0.2302	0	0.2572	0.2132	0.259	0.1652	0.0956	0.1746	0.2499	0.1676	0	0.2302	0.156
TTC39A	2948	AP	2			0	0.9442	0.7448	0.1186	0.0748	0.1078	0.0716	0.1687		0.2295	0.2349	0.3012	0.2859	0.4023	0.1544	0.2461	0.2806	0.3041			0.3263	0.1468	0.2553	0.1791	0.3512	0.307	0.1417	0.1158	0.372	0.2453	0.1624	0.1739	0.3095	0.1766	0.2416	0.1956	0.3289	0.3007	0.4076	0.2839	0.1269	0.5344	0.1738	0.324
TTC39A	2949	AP	5			0	0.9442	0.177	0.0178	0	0	0	0		0	0.0317	0	0	0	0.0791	0	0	0			0.0209	0	0	0	0	0.0179	0	0	0	0	0	0	0	0	0	0	0	0	0	0	0	0	0.1113	0
TTC39A	2950	AT	15.5			0	1	0.4938	0.06	0.1089	0.0283	0.0207	0.0817	0.17	0.0099	0.0117	0.0443	0.0487	0.0164	0.0984	0.0349	0.0177	0.0558	0.0613	0.1753	0.0158	0.0388	0.0252	0.0806	0.0597	0.0308	0.1035	0.0542	0.0389	0.0262	0.078	0.0592	0.0777	0.0212	0.016	0.006	0.0182	0.0107	0.0564	0.0088	0.011	0.0209	0.1385	0.0329
TTC39A	2951	AT	21			0	1	0.5584	0.0644	0.8855	0.9699	0.973	0.8957	0.83	0.9648	0.9766	0.9514	0.9439	0.9808	0.8923	0.9606	0.9818	0.9413	0.9335	0.7939	0.9776	0.9536	0.9609	0.9159	0.9268	0.955	0.888	0.9417	0.9611	0.961	0.9073	0.9355	0.916	0.9761	0.9783	0.9857	0.9676	0.9836	0.9376	0.9886	0.989	0.9751	0.8529	0.9641
TTC39A	2952	AT	16.2			0	1	0.128	0.0112	0.0056	0.0018	0.0063	0.0226	0	0.0253	0.0117	0.0043	0.0073	0.0028	0.0092	0.0045	0.0005	0.0029	0.0052	0.0308	0.0067	0.0075	0.0139	0.0035	0.0135	0.0142	0.0086	0.0042	0	0.0128	0.0147	0.0053	0.0063	0.0026	0.0056	0.0084	0.0141	0.0057	0.006	0.0026	0	0.004	0.0086	0.003
TTC39A	2953	AD	15.4	15.3	16.1	0	0.9459	1	0.0782	0.0683	0.0326	0.0168	0.0701	0.033	0.0383	0.0948	0	0.0657	0.2819	0.1292	0.0342	0.0031	0.2373	0.1082		0.0613	0.0024	0.0353	0.0232	0.058	0.0464	0.0093	0.0298	0.0387	0.0441	0.0153	0.0303	0.0678	0.0335	0.0494	0.1701	0.0139	0.0204	0	0.0424	0.6651	0.0204	0	0.0035
TTC39A	2954	RI	15.2	15.1	15.3	0	0.9668	0.6645	0.0441	0.0189	0.0043	0.0187	0	0.0444	0.0037	0.0041	0.0042	0.0078	0.0097	0.0192	0.0145	0.0046	0	0		0.0016	0.0086	0.0045	0.0149	0.0165	0.0039	0.0322	0.0215	0.0032	0.0071	0.0094	0.0145	0.0072	0.004	0.0082	0	0	0	0.02	0	0	0.0062	0.0136	0.0049
TTC39A	2955	AA	10.1	9	10.2	0	0.9686	0.7323	0.0857	0.3036	0.3183	0.2374	0.2067	0.1597	0.3215	0.2259	0.2207	0.2029	0.2014	0.3306	0.2948	0.2331	0.477	0.3132		0.3132	0.2191	0.2174	0.2753	0.3132	0.273	0.2692	0.3666	0.201	0.2101	0.1635	0.2168	0.3781	0.1697	0.2859	0.2548	0.1857	0.2184	0.2331	0.3708	0.1668	0.4062	0.1857	0.2233
EPS15	2956	AP	1			0	0.9494	0.771	0.0625	1	1	1	1	0.9442	1	1	1	1	1	1	1	1	1	1	1	1	1	0.9882	1	1	1	1	1	1	1	1	1	1	1	1	1	1	1	1	0.9727	1	1	0.9849	1
EPS15	2957	AP	13			0	0.9494	0.771	0.0625	0	0	0	0	0.0558	0	0	0	0	0	0	0	0	0	0	0	0	0	0.0118	0	0	0	0	0	0	0	0	0	0	0	0	0	0	0	0	0.0273	0	0	0.0151	0
EPS15	2958	ES	16:17:00	15	18	0	1	0.0216	0.0027	1	1	1	0.9927	0.9889	1	0.9822	1	1	1	1	1	1	1	1	1	1	1	1	1	1	1	1	0.9938	1	1	1	1	1	1	1	1	1	0.9849	1	1	1	1	1	1
OSBPL9	2960	AP	9.1			0	0.993	0.1969	0.0198	0.9503	1	1	1	1	1	1	1	0.9804	0.994	1	1	0.9837	1	1	1	1	0.9893	1	1	1	1	1	1	0.9807	0.9939	1	0.9927	1	1	1	1	1	0.9539	0.9934	1	1	1	1	1
OSBPL9	2962	AP	1			0	0.993	0.1679	0.0141	0.0497	0	0	0	0	0	0	0	0	0	0	0	0.0163	0	0	0	0	0	0	0	0	0	0	0	0	0	0	0	0	0	0	0	0	0	0	0	0	0	0	0
OSBPL9	2964	AP	8			0	0.993	0.1655	0.0135	0	0	0	0	0	0	0	0	0.0196	0.006	0	0	0	0	0	0	0	0.0107	0	0	0	0	0	0	0.0193	0.0061	0	0.0073	0	0	0	0	0	0.0461	0.0066	0	0	0	0	0
OSBPL9	2968	ME	16|17	15	18	0	0.9983	0.2082	0.0168	0.0169	0	0.0023	0.0136	0.0387	0	0.0063	0.0032	0	0	0	0.0053	0.0074	0	0.0118	0.0063	0.006	0.0108	0.0128	0	0	0	0	0.0336	0.0102	0	0	0.0072	0.0043	0	0	0	0.0036	0	0	0.0184	0	0.0122	0.0014	0.0105
OSBPL9	2969	ES	17	15	18	0	1	0.6726	0.0979	0.9629	0.9325	0.9332	0.7706	0.9133	0.8344	0.9366	0.9268	0.8876	0.6061	0.9062	0.9214	0.9297	0.8896	0.9765	0.6355	0.9459	0.8619	0.7227	0.891	0.8365	0.9571	0.8875	0.7253	0.9059	0.7677	0.9526	0.9387	0.8444	0.9604	0.8416	0.9258	0.9395	0.9454	0.9185	0.9303	0.7976	0.7921	0.8503	0.9304
OSBPL9	2971	ES	14	13	15	0	0.9948	0.2511	0.0246	0.0248	0.0214	0.0063	0.0278	0.0422	0.0372	0.0102	0.0166	0.016	0.0091	0.0202	0.0452	0.0387	0.0106	0.0305	0.029	0.0394	0.0239	0.0522	0.0333	0.0498	0.0197	0.026	0.0158	0.0065	0.0448	0.0394	0.0291	0.0363	0.0251	0.032	0	0	0.0413	0.0294	0.0348	0	0	0.0258	0.0427
OSBPL9	2974	ES	11	9.2	12	0	0.9791	0.0775	0.0049	1	1	1	1	1	1	0.9666	1	1	1	1	1	1	1	1	1	1	1	1	1	1	1	1	1	1	1	1	1	1	1	1	1	1	1	1	1	1	1	1	1
OSBPL9	2975	AD	9.2	9.1	11	0	0.9843	0.8779	0.094	0.6312	0.7955	0.8552	0.8191	0.7896	0.8275	0.7338	0.8783	0.8383	0.8768	0.8198	0.7458	0.8002	0.7662	0.7016	0.8017	0.9542	0.9017	0.8929	0.7734	0.6524	0.7756	0.7433	0.7294	0.7644	0.821	0.782	0.8049	0.9141	0.7211	0.7945	0.7948	0.7669	0.8295	0.7309	0.9382	0.7902	0.7145	0.7896	0.7536
OSBPL9	2976	ES	10	7	11	0	0.9337	0.3096	0.0274	0	0	0.0207	0.012	0	0	0	0	0	0	0	0.0081	0	0	0	0	0	0.0951	0	0	0	0	0	0	0	0	0	0	0	0	0	0	0	0	0.0115	0	0.0223		0	0
OSBPL9	2977	AD	6.2	6.1	7	0	0.9599	0.4057	0.0435	0.006	0	0	0.0151	0.0127	0	0	0	0	0.0028	0	0	0	0	0	0	0	0	0.0062	0.0164	0	0	0	0	0	0.0245	0	0	0.0148	0	0	0	0	0	0	0	0.0183	0	0.0178	0
OSBPL9	2979	ES	6.1	5	7	0	0.993	0.5426	0.0883	0.9168	0.83	0.9388	0.7651	0.9189	0.8813	0.8628	0.9101	0.8192	0.9495	0.8341	0.8726	0.831	0.7597	0.8747	0.9799	0.7867	0.813	0.7065	0.8726	0.7624	0.783	0.8316	0.8448	0.8175	0.8052	0.8877	0.8996	0.9133	0.8197	0.8768	0.9303	0.7965	1	0.8669	0.7812	0.8919	0.8573	0.8432	0.6125
OSBPL9	2981	ES	5	4	6.1	0	0.986	0.0926	0.0105	1	1	1	0.9882	1	1	0.9689	1	1	1	1	1	1	1	1	1	1	1	0.978	1	1	1	1	1	1	1	1	1	1	1	1	1	1	1	1	1	1	0.9459	1	1
NRD1	2982	AP	1.1			0	0.9703	0.134	0.0173	1	0.9674	1	1	1	1	1	1	1	1	0.9894	0.9881	1	1	1	1	1	1	1	1	1	1	1	0.9728	1	1	1	1	1	1	1	1	1	1	1	1	1	0.8733	1	1
NRD1	2983	AP	2			0	0.9703	0.134	0.0173	0	0.0326	0	0	0	0	0	0	0	0	0.0106	0.0119	0	0	0	0	0	0	0	0	0	0	0	0.0272	0	0	0	0	0	0	0	0	0	0	0	0	0	0.1267	0	0
NRD1	2986	ES	26	25	27	0	1	0.7013	0.0592	0.0616	0.0221	0.0223	0.0398	0.0612	0.0285	0.0212	0.023	0.0324	0.0208	0.0683	0.0241	0.0051	0.0225	0.0249	0.023	0.0337	0.0282	0.0226	0.0783	0.02	0.0324	0.0289	0.0332	0.0148	0.0254	0.0712	0.0367	0.0078	0.0235	0.0086	0.033	0.0298	0.0114	0.0476	0.0059	0.0216	0.0393	0.0147	0.0187
NRD1	2987	ES	04:05:00	3	6	0	0.9965	0.9296	0.1014	0.0974	0.0508	0.1523	0.1593	0.2824	0.1632	0.0838	0.1483	0.2117	0.0519	0.1508	0.1716	0.1257	0.1121	0.1324	0.1375	0.0945	0.1657	0.1757	0.264	0.109	0.0686	0.1023	0.1611	0.0982	0.1019	0.1501	0.1658	0.1181	0.1673	0.0599	0.2706	0.1406	0.0555	0.1613	0.0738	0.1793	0.1632	0.1275	0.0732
NRD1	2988	AD	1.2	1.1	3	0	1	0.2034	0.0156	0.9861	0.9696	0.9852	0.9971	0.9818	0.9954	0.9587	1	0.9875	1	0.9883	0.9878	0.9944	0.9807	1	0.9982	0.9701	0.98	0.9898	0.992	0.9814	1	0.987	1	0.9853	0.9913	1	0.9803	0.9853	0.9711	0.9815	0.9784	0.9873	1	0.9842	1	0.9875	1	0.9949	1
TXNDC12	2989	AT	9			0	1	0.0507	0.0085	0.9786	0.9721	0.9764	0.9801	0.9796	0.9632	0.9766	0.9863	0.977	0.9656	0.9682	0.9885	0.9871	0.9693	0.9761	0.9824	0.9861	0.9858	0.9874	0.9707	0.9821	0.959	0.9754	0.9723	0.9756	0.9735	0.979	0.9726	0.9815	0.974	0.9816	0.9809	0.983	0.9786	0.9807	0.981	0.9784	0.9905	0.9723	0.9801
TXNDC12	2990	AT	3			0	1	0.0507	0.0085	0.0214	0.0279	0.0236	0.0199	0.0204	0.0368	0.0234	0.0137	0.023	0.0344	0.0318	0.0115	0.0129	0.0307	0.0239	0.0176	0.0139	0.0142	0.0126	0.0293	0.0179	0.041	0.0246	0.0277	0.0244	0.0265	0.021	0.0274	0.0185	0.026	0.0184	0.0191	0.017	0.0214	0.0193	0.019	0.0216	0.0095	0.0277	0.0199
TXNDC12	2991	ES	4	2	5	0	1	0.4139	0.0352	0.0106	0.0089	0	0.0022	0.0135	0.0017	0.0018	0.0022	0.0156	0.0012	0.0048	0.0082	0.0017	0.0062	0.0201	0.0039	0	0.0043	0.005	0.005	0.0026	0.004	0.004	0.008	0.0016	0.0038	0.02	0.0031	0.0016	0	0.0041	0.0075	0.0056	0.0036	0.0117	0.0093	0.0065	0.0044	0.0169	0.0021
BTF3L4	2992	AT	6.2			0	1	0.2937	0.0303	0.0196	0.0172	0.0118	0.0206	0.0423	0.0143	0.0066	0.0029	0.0043	0.0125	0.0223	0.0088	0.0033	0.0166	0.0217	0.0066	0.0144	0.0169	0.0118	0.0428	0.0076	0	0.0189	0.0187	0.0053	0.0093	0.0127	0.0198	0.0126	0.0033	0.0038	0.0112	0.0052	0.0114	0.0206	0.0043	0.0239	0.0151	0.0049	0.0066
BTF3L4	2993	AT	7			0	1	0.2937	0.0303	0.9804	0.9828	0.9882	0.9794	0.9577	0.9857	0.9934	0.9971	0.9957	0.9875	0.9777	0.9912	0.9967	0.9834	0.9783	0.9934	0.9856	0.9831	0.9882	0.9572	0.9924	1	0.9811	0.9813	0.9947	0.9907	0.9873	0.9802	0.9874	0.9967	0.9962	0.9888	0.9948	0.9886	0.9794	0.9957	0.9761	0.9849	0.9951	0.9934
BTF3L4	2994	ES	5	4	6.1	0	1	0.1896	0.0242	0.9182	0.9478	0.9461	0.9219	0.9612	0.9254	0.9317	0.9183	0.9573	0.9144	0.9305	0.947	0.9401	0.9378	0.9494	0.9096	0.9201	0.9514	0.902	0.9423	0.9413	0.9382	0.9374	0.9064	0.9378	0.9446	0.9641	0.9374	0.9393	0.9241	0.9485	0.9086	0.919	0.9011	0.9423	0.9443	0.9001	0.9383	0.9355	0.9443
BTF3L4	2995	ES	3	2	4	0	1	0.2645	0.015	0	0.0037	0.0019	0.0032	0.0045	0.003	0	0.0074	0.0166	0.006	0.0035	0.0035	0.0071	0.004	0.0076	0	0	0.0071	0.0035	0.0048	0.0023	0.0013	0.005	0.0036	0.0027	0.0028	0.0105	0.0122	0.0016	0.0039	0.0123	0.0036	0.0054	0	0.0108	0.011	0.0037	0.0152	0.0049	0.0013
BTF3L4	2997	ES	2	1	4	0	1	0.208	0.028	0.9625	0.967	0.9536	0.9505	0.9226	0.9529	0.9342	0.9409	0.9317	0.9235	0.9685	0.9459	0.9505	0.9879	0.942	0.9118	0.9385	0.9707	0.9591	0.9199	0.9773	0.9634	0.9514	0.9631	0.9513	0.9251	1	0.9389	0.8969	0.9734	0.9592	0.9598	0.9733	0.9936	0.9611	0.9763	0.9473	0.9609	0.9804	0.9822
ZFYVE9	3000	ES	6	5	7	0	0.9825	0.1926	0.0344	1	0.9584	1	0.9876	0.9633	1	1	0.9786	0.9833	1	0.9736	0.9849	1	1	1	1	1	0.9791	1	1	0.9346	0.9415	0.9514	0.9768	0.9791	0.9703	1	0.953	1	1	1	1	1	1	0.9724	1		1	1	0.982
CC2D1B	3001	AT	24			0	1	0.3417	0.0506	0.1362	0.1186	0.0684	0.143	0.1091	0.1015	0.0583	0.0995	0.0405	0.1552	0.3417	0.0773	0.0673	0.055	0.0631	0.0147	0.0579	0.1002	0.1026	0.1519	0.0794	0.0687	0.1439	0.1202	0.0352	0.0551	0.1777	0.147	0.1473	0.1462	0.0844	0.2727	0.1222	0.0384	0.1184	0.0595	0.1111	0.052	0.0721	0.0464
CC2D1B	3002	AT	25.3			0	1	0.3417	0.0506	0.8638	0.8814	0.9316	0.857	0.8909	0.8985	0.9417	0.9005	0.9595	0.8448	0.6583	0.9227	0.9327	0.945	0.9369	0.9853	0.9421	0.8998	0.8974	0.8481	0.9206	0.9313	0.8561	0.8798	0.9648	0.9449	0.8223	0.853	0.8527	0.8538	0.9156	0.7273	0.8778	0.9616	0.8816	0.9405	0.8889	0.948	0.9279	0.9536
CC2D1B	3003	RI	25.2	25.1	25.3	0	1	0.7426	0.0937	0.3734	0.218	0.1945	0.1935	0.1944	0.163	0.117	0.0786	0.2129	0.2508	0.208	0.094	0.0562	0.1453	0.0779	0.1033	0.1188	0.0741	0.1992	0.2636	0.1214	0.2285	0.1052	0.1903	0.1167	0.1132	0.1193	0.1695	0.107	0.1625	0.1094	0.1173	0.0971	0.0554	0.135	0.143	0.1291	0.2382	0.1664	0.102
CC2D1B	3004	AA	14.1	13	14.2	0	0.9825	0.744	0.0876	0.1694	0.1729	0.0545	0.1771	0.2251	0.0741	0.1994	0.2364	0.4019	0.1294	0.1655	0.1604	0.1234	0.1088	0.2035	0.1541	0.1558	0.2021	0.1321	0.2518	0.2652	0.2374	0.1347	0.2365	0.094	0.0918	0.1994	0.1917	0.1133	0.0508	0.1974	0.3156	0	0.0767	0.2459	0.1102	0.1366	0.0767	0.099	0.2695
ZCCHC11	3007	AT	30			0	1	0	0	1	1	1	1	1	1	1	1	1	1	1	1	1	1	1	1	1	1	1	1	1	1	1	1	1	1	1	1	1	1	1	1	1	1	1	1	1	1	1	1
ZCCHC11	3008	AT	3.2			0	1	0	0	0	0	0	0	0	0	0	0	0	0	0	0	0	0	0	0	0	0	0	0	0	0	0	0	0	0	0	0	0	0	0	0	0	0	0	0	0	0	0	0
ZCCHC11	3010	ES	5	4	6	0	0.9511	0.1291	0.0159	1	1	1	1	1	1	1	1	1	1	0.9703	1	1	1	1	1	1	1	1	1	1	1	1	1	1	1	1	1	1	1	1	1		1	1	1	1	1	1	1
ZYG11B	3011	AT	14.2			0	1	0.0457	0.0052	0	0	0	0	0	0	0	0	0	0	0	0.0122	0	0	0	0	0	0	0	0	0	0	0	0	0	0	0	0	0	0	0	0	0	0	0	0	0	0	0	0
ZYG11B	3012	AT	15			0	1	0.0457	0.0052	1	1	1	1	1	1	1	1	1	1	1	0.9878	1	1	1	1	1	1	1	1	1	1	1	1	1	1	1	1	1	1	1	1	1	1	1	1	1	1	1	1
ZYG11B	3015	ES	09:10:00	8	12	0	0.9634	0.1152	0.008	1	1	1	1	1	1	1	1	1	1	1	1	1	1	1	1	1	1	1	1	1	1	1	1	1	1	1	1	1	1	1	1	1	1	1	1	1	1	1	1
ECHDC2	3019	AT	8.2			0	1	0.278	0.037	0.178	0.151	0.0913	0.1484	0.1579	0.097	0.0849	0.06	0.0888	0.1574	0.1576	0.1203	0.0754	0.1637	0.0921	0.0968	0.0722	0.0895	0.1133	0.0729	0.1735	0.074	0.1565	0.1108	0.09	0.0603	0.1618	0.1692	0.0239	0.0309	0.0825	0.051	0.0744	0.0821	0.0988	0.0388	0.0743	0.0509	0.0741	0.1132
ECHDC2	3020	AT	5.2			0	1	0.35	0.0479	0.1631	0.0827	0.0661	0.0964	0.1159	0.0609	0.0483	0.0182	0.084	0.0741	0.1195	0.0678	0.023	0.1284	0.1364	0.0919	0.0411	0.0476	0.0526	0.1108	0.1513	0.0534	0.1012	0.1461	0.0545	0.0602	0.1419	0.0846	0.0321	0.0393	0.0422	0.008	0.0421	0.0275	0.0991	0.0047	0.0144	0.0228	0.0566	0.0297
ECHDC2	3021	AT	9.2			0	1	0.3445	0.0597	0.2738	0.1885	0.1285	0.2467	0.2333	0.1326	0.1305	0.1044	0.138	0.2354	0.2732	0.1785	0.0866	0.2392	0.2013	0.1502	0.1012	0.1208	0.1512	0.1751	0.1412	0.1242	0.2518	0.1826	0.1553	0.0901	0.1777	0.2553	0.0547	0.0933	0.109	0.0745	0.0637	0.0835	0.2312	0.0393	0.1015	0.1221	0.1234	0.1144
ECHDC2	3022	AT	14			0	1	0.7168	0.1256	0.3851	0.5779	0.714	0.5085	0.493	0.7095	0.7363	0.8175	0.6892	0.5331	0.4497	0.6334	0.815	0.4687	0.5702	0.6611	0.7855	0.7421	0.6829	0.6412	0.534	0.7484	0.4905	0.5605	0.7002	0.7894	0.5187	0.4909	0.8893	0.8365	0.7664	0.8665	0.8199	0.8069	0.5709	0.9172	0.8098	0.8043	0.7459	0.7427
ECHDC2	3023	ES	13	12	14	1	0.9058	0.2919	0.0484	0.921	0.9024	0.9373	0.9312	0.9102	0.8938	0.9022	0.9027	0.9157		0.8913	0.9109	0.9666	0.9429		0.7726	0.9471	0.9136	0.8859	0.8459		0.9525	0.9262	0.913	0.8349	0.757		0.8944		0.9348	0.8132	0.9295	0.8613	0.9018	0.9587	0.8978	0.9442		0.9119	0.9571
ECHDC2	3024	ES	9.1	8.1	10	0	0.9791	0.9684	0.1358	0.6556	0.638	0.5466	0.4775	0.7515	0.7055	0.4272	0.4193	0.5198	0.7732	0.5639	0.5867	0.7033	0.6454	0.7323	0.6766	0.6067	0.6817	0.256	0.6841	0.6483	0.7228	0.5567	0.4627	0.5202	0.29	0.7638	0.6272	0.5193	0.7382	0.4628	0.3478	0.6815	0.6679	0.8135	0.3715	0.3619	0	0.3494	0.6797
ECHDC2	3025	AA	6.1	5.1	6.2	0	0.9948	0.7838	0.0999	0.9196	0.9094	0.883	0.7939	0.8153	0.8003	0.9336	0.5869	0.64	0.6854	0.8632	0.7123	0.7329	0.7397	0.8008	1	0.5797	0.7082	0.798	0.7755	0.8	0.7841	0.8886	0.8088	1	0.881	0.7129	0.6679	0.8612	0.9203	0.8854	0.8938	0.8466	0.6455	0.7623	0.7476	0.7267	0.8922	0.6264	0.8054
ECHDC2	3026	ME	3|4	2.1	5.1	0	0.8499	0.8179	0.1197	0.2302	0.3405	0.7305	0.3593	0.3846	0.1979			0.2688	0.4864	0.2594	0.419	0.6098	0.3191	0.4941	0.3086		0.1412	0.2294	0.1601	0.3086	0.4647	0.3005	0.3695	0	0.4098	0.2066	0.2418			0				0.2066		0.756		0.5102	0.4011
ECHDC2	3027	ES	4	2.1	5.1	0	0.9162	1	0.2105	0.7895	0.7019		0.3545	0.7788	0.5271		0.1636	0.7495	0.1948	0.5456	0.4779	0.0765	0.6377	0.4842	0.7113		0.4008	0.2089	0.7063	0.451	0.613	0.5199	0.7897	0.2604	0.1571	0.7601	0.5349		0.1901	0.4842	0.031	0.1901	0.2604	0.4033	0	0.1785		0.2604	0.2604
ECHDC2	3028	ES	3	2.1	5.1	0	0.7592	0.8871	0.198	0.5287	0.5486	0.6626	0.2355	0.6875	0.2157		0.1089		0.1864	0.2961	0.3976	0.1146	0.4521	0.4783			0.0991	0.0728	0.3143			0.3176	0.6875	0	0.1146		0.2683		0.1549		0.1304			0.1497	0	0.4023		0.2683	0.1908
ECHDC2	3030	ES	4:5.1:6.1	2.1	6.2	0	0.9843	1	0.1605	0.5042	0.1693	0.0722	0.3026	0.3011	0.205	0.073	0.0275	0.1247	0.2017	0.3045	0.1737	0.0274	0.1118	0.2207	0.3386	0.108	0.1103	0.1621	0.1246	0.192	0.0944	0.2657	0.2115	0.1387	0.133	0.2289	0.1907	0.0297	0.0862	0.1934	0.0117	0.0513	0.0582	0.237	0	0.077		0.074	0.0638
ECHDC2	3031	ES	3:5.1:6.1	2.1	6.2	0	0.9791	1	0.1365	0.2737	0.11	0.2045	0.2251	0.266	0.0679	0.1721	0.0216	0.0601	0.2199	0.1577	0.154	0.0486	0.0643	0.248	0.223	0	0.0232	0.0628	0.0322	0.1143	0.1007	0.1513	0.1569	0	0.1114	0.0842	0.0842	0.0533	0.0825	0	0.0572	0	0	0.0861	0	0.2335		0.0907	0.0539
ECHDC2	3032	ES	2.2:5.1:6.1	2.1	6.2	0	0.9372	1	0.1054	0.1354	0	0.036	0.046	0.0715	0.0288	0	0.08	0	0.2159	0.0849	0.122	0.0253	0.0106	0.053	0.2262	0	0.1371	0.1404	0.0285	0.1161	0.1137	0.1168	0.0864	0.0886	0	0.0941	0.0116	0.1467	0	0.0521	0.0201	0.0326	0.1017	0.0402	0.0397	0.0491	0.6545	0.0827	0.0549
ECHDC2	3033	ES	5.1:6.1	2.1	6.2	0	0.9721	1	0.164	0.2972	0.1084	0.1398	0.5347	0.1837	0.2361	0.1089	0.1876	0.0677	0.5963	0.356	0.2529	0.3187	0.0899	0.3047	0.2505	0.1873	0.2044	0.5028	0.0832	0.3037	0.0931	0.3091	0.0927	0.3776	0.5379	0.1177	0.2381	0.2699	0.38	0.2576	0.3101	0.2453	0.1923	0.3888	0.2227	0.3521		0.2493	0.2357
ECHDC2	3034	ES	00:04:05.100000	2.1	6.2	0	0.9529	0.8029	0.0865	0.1502	0.0335	0.0214	0.1509	0.1522	0.1057	0.0096	0.0436	0.0982	0.1863	0.1453	0.1024	0.0146	0.0542	0.0949	0	0.1372	0.066	0.0588	0.0538	0.1042	0.047	0.0644	0.0819	0	0.0271	0.1917	0.1591	0.0077	0.0094	0.0479	0.0024	0.0129	0.0693	0.1278	0	0.0666		0.0793	0.0259
ECHDC2	3035	ES	00:03:05.100000	2.1	6.2	0	0.9372	1	0.0724	0.0558	0.0195	0.063	0.1021	0.1161	0.0314	0.0235	0.0322	0.045	0.1962	0.0626	0.0863	0.026	0.0289	0.1041	0	0	0.013	0.0209	0.0121		0.0465	0.0314	0.0554	0	0.0217	0.0616	0.0642	0.0136	0.0086	0	0.0124	0	0	0.0407	0	0.1994		0.0924	0.0204
ECHDC2	3036	ES	2.2:5.1	2.1	6.2	0	0.9162	0.4151	0.045	0.0239	0	0.0097	0.0185	0.0271	0.013	0	0.1155	0	0.1922	0.032	0.0671	0.0134	0.0046	0.0193	0	0	0.081	0.0496	0.0107		0.0528	0.0235	0.0289	0	0	0.0688	0.0086	0.0403	0	0.0109	0.0042	0.0079	0.1154	0.0185	0.0332	0.0404	0.2753	0.0842	0.0207
ECHDC2	3037	ES	5.1	2.1	6.2	0	0.9442	0.8555	0.105	0.0565	0.0181	0.0381	0.3006	0.0667	0.1174	0.0131	0.2448	0.049	0.5495	0.1537	0.1435	0.1949	0.0392	0.128	0	0.2028	0.122	0.2423	0.0301	0.1528	0.0395	0.0723	0.0296	0	0.1671	0.0788	0.1781	0.08	0.054	0.0627	0.0859	0.0703	0.208	0.2149	0.1888	0.2977		0.2432	0.0953
SCP2	3042	RI	16.2	16.1	16.3	0	1	0.2006	0.0169	0.0134	0.0076	0.0037	0.012	0.0103	0.0038	0.005	0.0027	0.0078	0.0141	0.0165	0.0033	0.0009	0.0105	0.0074	0.0071	0.0026	0.0063	0.0065	0.0159	0.0038	0.0028	0.0062	0.0132	0.0033	0.0043	0.0034	0.0112	0.0065	0.0043	0.0047	0.0026	0.0017	0.0017	0.0078	0.001	0.005	0.0067	0.003	0.0031
SCP2	3043	ES	15	14.2	16.1	0	1	0.1563	0.0107	0.9811	0.9815	0.9747	0.9822	0.9911	0.9845	0.9895	0.9804	0.9829	0.9924	0.983	0.9873	0.9814	0.9861	0.982	0.986	0.9788	0.9844	0.9809	0.9844	0.9893	0.9801	0.9784	0.9725	0.9794	0.9645	0.9944	0.9826	0.9873	0.9616	0.976	0.9799	0.9752	0.9849	0.9841	0.9678	0.9846	0.9523	0.9892	0.9858
SCP2	3044	AA	14.1	13	14.2	0	1	0.0533	0.0049	0.9966	0.9922	0.9975	0.9951	1	0.9917	0.9957	0.9939	0.9968	0.993	0.9965	0.9984	0.9971	1	0.9924	0.9893	0.9944	1	0.9868	0.9948	1	0.9933	1	0.9908	0.9881	0.9902	0.9952	0.9985	0.9955	0.9952	0.9967	0.9978	0.9938	0.9891	0.9952	0.993	1	1	0.9959	0.9964
SCP2	3045	ES	12	11	13	0	1	0.8004	0.1682	0.3937	0.6105	0.7422	0.6406	0.2608	0.6068	0.7048	0.6541	0.5542	0.6689	0.6788	0.5534	0.33	0.5567	0.3179	0.7565	0.5537	0.4923	0.7736	0.5986	0.7255	0.3976	0.5114	0.6978	0.6399	0.6692	0.5057	0.5806	0.5647	0.2806	0.638	0.2814	0.2874	0.4122	0.6721	0.777	0.7005	0.6508	0.8474	0.3177
SCP2	3046	ES	4	3	5	0	0.9965	0.2128	0.0274	0.9619	0.9626	0.9588	0.9659	0.9903	0.9853	0.9296	0.9481	0.9624	0.9617	0.9521	0.9917	0.9818	0.9699	0.9735	0.9293	0.9643	0.9468	1	0.9747	1	0.9856	0.96	0.9878	0.9785	0.9513	0.972	0.9938	0.9754	0.9593	1	0.9683	0.9541	0.931	0.9721	0.9825	0.9576	0.9296	0.9902	0.9634
SCP2	3048	ES	3	2	4	0	0.993	0.1951	0.0093	1	1	1	1	1	1	0.9766	1	1	0.9959	1	1	0.9962	1	1	1	1	0.9786	0.9768	1	1	1	1	1	1	1	0.9761	1	1	1	1	1	1	1	0.985	1	1	1	1	1
SCP2	3050	ES	2	1	3	0	0.9913	0.0732	0.0065	1	1	1	1	1	1	1	1	1	1	1	1	1	1	1	1	1	1	1	1	1	1	1	1	1	1	1	1	1	1	1	1	1	1	1	1	1	1	1	1
PODN	3051	ES	5:6:7:8	4	9	0	0.9965	0.1442	0.0185	0.9753	1	1	0.985	0.9854	0.9581	0.9855	0.9521	1	0.9357	0.9863	0.9953	0.9706	0.9612	0.9696	1	0.9778	0.9525	0.9644	0.9831	0.9859	0.9591	0.9566	1	0.9937	0.9724	0.9732	0.9913	1	1	1	0.9654	0.9759	0.9807	0.9544	1	0.9505	1	0.9895	0.9948
SLC1A7	3053	AT	12			0	0.9878	0.3333	0.033	0.993	0.9971	1	0.9847	1	1	0.9996	1	0.9508	1	1	0.9967	1	0.9961	0.9993		0.986	1	0.9836	1	1	0.9946	0.9531	0.9935	0.9992	1	1	0.9968	1	0.9997	1	0.9993	1	1	0.9672	0.9988	1	1	1	1
SLC1A7	3054	AT	4			0	0.9878	0.3333	0.033	0.007	0.0029	0	0.0153	0	0	0.0004	0	0.0492	0	0	0.0033	0	0.0039	0.0007		0.014	0	0.0164	0	0	0.0054	0.0469	0.0065	0.0008	0	0	0.0032	0	0.0003	0	0.0007	0	0	0.0328	0.0012	0	0	0	0
MAGOH	3055	ES	3	2	4	0	1	0.4703	0.039	0.9209	0.8999	0.8923	0.835	0.9264	0.8595	0.8431	0.9116	0.8809	0.8084	0.876	0.8909	0.8927	0.8866	0.9095	0.8661	0.8826	0.8919	0.8094	0.8525	0.916	0.8133	0.8207	0.8347	0.8343	0.8746	0.9142	0.899	0.8652	0.8114	0.7373	0.7791	0.8076	0.8342	0.8757	0.7857	0.8259	0.768	0.8752	0.9137
LRP8	3058	ES	20	19	21	0	0.9459	0.911	0.1789	0.2229	0.3537	0.5563	0.5229	0.5643	0.6112	0.6658	0.4284		0.6774	0.6552	0.4339	0.8328	0.7851	0.3991	0.2545	0.3784	0.4252	0.4435	0.5705	0.7798	0.5191	0.5335	1	0.6658	0.5873	0.3174	0.3151		0.5705	0.8495	0.2933	0.5705	0.6241	0.4617	0.631	0.5651	0.4397	0.9049	0.56
LRP8	3059	ES	17	16	18	0	0.9756	0.3722	0.0636	1	1	0.9179	0.869	0.9296	0.9445	1	0.9623		0.9698	0.9586	0.8953	0.9236	1	0.7664	0.9578	0.8181	0.9884	0.9626	0.9248	1	1	0.9577	1	1	0.895	1	0.9213	1	1	1	1	0.8797	1	0.9851	1	1	0.8907	0.9578	1
LRP8	3060	ES	10	9	11	0	0.897	0.4477	0.049	1	1	1	1	1	0.9701	1	0.9774		0.9933	0.9772	1		1	1	0.9767	0.8865	0.9745	1	1	1	1	0.9569	1	0.9427	1	1	1	1		1	1	1	1	1	0.9165	1	1	0.96	1
NDC1	3067	ES	13.2:14	13.1	15	0	0.9983	0.1452	0.0112	1	1	1	1	1	1	1	0.992	1	1	0.9887	0.9923	1	1	1	0.9925	1	0.9897	1	1	1	1	1	1	0.9846	1	1	1	1	1	1	1	1	1	1	1	1	1	1	1
NDC1	3068	ES	8	7	9	0	0.993	0.1129	0.0101	1	1	1	1	1	1	1	1	1	1	1	1	1	1	1	1	1	1	1	1	1	1	1	1	1	1	1	1	1	1	1	1	1	1	1	1	1	1	1	1
NDC1	3069	ES	2	1	3	0	0.9093	0.4043	0.062	0.9396	0.9566	0.9656	0.9725	0.855	0.9477	0.9163	0.9191	1	0.9837	0.9581	1	1	0.9026	1	0.9071	1	0.91	0.9642	0.7849	0.9426	1	1	1	0.9488	1	1	0.9335	1	1	0.944	0.9218	0.9509	1	1	1	0.8536		0.9904	1
YIPF1	3070	AP	1			0	0.9965	0.1972	0.0179	0.0043	0.0031	0	0.0019	0	0.0059	0	0.0053	0	0.0027	0	0	0	0.0063	0.0133	0	0	0.0037	0.0083	0.0152	0.0048	0	0.0054	0.0266	0.011	0.0055	0	0.0088	0	0.007	0.0112	0	0	0	0	0.0048	0	0	0.0092	0
YIPF1	3071	AP	2			0	0.9965	0.1972	0.0179	0.9957	0.9969	1	0.9981	1	0.9941	1	0.9947	1	0.9973	1	1	1	0.9937	0.9867	1	1	0.9963	0.9917	0.9848	0.9952	1	0.9946	0.9734	0.989	0.9945	1	0.9912	1	0.993	0.9888	1	1	1	1	0.9952	1	1	0.9908	1
YIPF1	3074	ES	12	11	13	0	1	0.6499	0.1003	0.6102	0.7369	0.7451	0.8172	0.9374	0.7988	0.5547	0.7976	0.9726	0.6863	0.6727	0.8932	0.644	0.6776	0.7423	0.8228	0.8399	0.7363	0.3823	0.8566	0.8417	0.6457	0.5192	0.767	0.8042	0.8853	0.6741	0.6822	0.6377	0.7471	0.7335	0.8495	0.7721	0.6346	0.7297	0.8199	0.7318	0.6518	0.5106	0.7341
YIPF1	3077	ES	03:04:00	2	5	0	1	0.2371	0.0277	0.9575	0.99	0.9878	0.9883	1	1	1	0.9851	1	1	0.9796	0.9746	0.96	0.9456	0.9324	0.9745	0.9515	0.9915	0.9113	1	1	0.9776	0.9882	0.9786	0.9891	1	0.9652	0.9614	0.9681	1	0.9825	0.9694	0.9455	0.9662	0.966	0.9288	0.918	1	0.9605	0.9867
YIPF1	3078	ES	4	2	5	0	0.986	0.4241	0.054	0.9326	0.9878	0.9644	0.9763	1	1	1	0.986	1	1	0.9476	0.9454	0.9386	0.9202	0.8849	0.979	0.9391	0.9912	0.962	1	1	0.938	0.9703	0.9635	0.9861	1	0.943	0.9423	0.956	1	0.9742	0.9111	0.9249	0.978	0.965	0.8913	0.8679	1	0.9356	0.9725
YIPF1	3079	ES	3	2	4	0	1	0.7492	0.1075	0.655	0.5773	0.7694	0.689	0.595	0.6627	0.6548	0.5405	0.5473	0.744	0.7559	0.7184	0.6338	0.5981	0.6633	0.5124	0.5945	0.5301	0.3324	0.7401	0.6539	0.7573	0.7318	0.6386	0.5959	0.6972	0.6475	0.6357	0.6058	0.7187	0.637	0.7852	0.6395	0.4745	0.5439	0.6445	0.6548	0.8037	0.6484	0.701
HSPB11	3095	AP	1			0	0.9983	0	0	1	1	1	1	1	1	1	1	1	1	1	1	1	1	1	1	1	1	1	1	1	1	1	1	1	1	1	1	1	1	1	1	1	1	1	1	1	1	1	1
HSPB11	3096	AP	2.1			0	0.9983	0	0	0	0	0	0	0	0	0	0	0	0	0	0	0	0	0	0	0	0	0	0	0	0	0	0	0	0	0	0	0	0	0	0	0	0	0	0	0	0	0	0
HSPB11	3097	AT	6			0	1	0.6636	0.0975	0.6502	0.6931	0.8655	0.7564	0.6441	0.811	0.793	0.8743	0.5665	0.8778	0.7598	0.8552	0.8845	0.6575	0.7396	0.8681	0.7826	0.8413	0.8807	0.6203	0.732	0.8174	0.7781	0.7419	0.831	0.7926	0.7305	0.7789	0.8724	0.8666	0.8671	0.8936	0.935	0.8614	0.7246	0.9441	0.9128	0.9266	0.8731	0.8014
[truncated: 42,386 more rows]
[truncated: 246 more columns]
