# Supplementary material for: Survival-associated alternative splicing signatures in non-small cell lung cancer
Source: Aging (Albany NY). 2020 Apr 13;12(7):5878–93. doi: 10.18632/aging.102983 (PMC7185095; doi:10.18632/aging.102983)
Supplement: Supplementary Table 1. PSI_LUAD_2 [file aging-12-102983-s007..xlsx]

## Sheet: Sheet1
symbol	as_id	splice_type	exons	from_exon	to_exon	novel_splice	pct_with_values	psi_range	std_psi	TCGA_55_8619	TCGA_55_8620	TCGA_55_8621	TCGA_55_A48X	TCGA_55_A48Y	TCGA_55_A48Z	TCGA_55_A490	TCGA_55_A491	TCGA_55_A492	TCGA_55_A493	TCGA_55_A494	TCGA_55_A4DF	TCGA_55_A4DG	TCGA_55_A57B	TCGA_62_8394	TCGA_62_8395	TCGA_62_8397	TCGA_62_8398	TCGA_62_8399	TCGA_62_8402	TCGA_62_A46O	TCGA_62_A46P	TCGA_62_A46R	TCGA_62_A46S	TCGA_62_A46U	TCGA_62_A46V	TCGA_62_A46Y	TCGA_62_A470	TCGA_62_A471	TCGA_62_A472	TCGA_64_1676	TCGA_64_1677	TCGA_64_1678	TCGA_64_1679	TCGA_64_1680	TCGA_64_1681	TCGA_64_5774	TCGA_64_5775	TCGA_64_5778	TCGA_64_5779
PLEKHN1	1	ES	11	10	12	0	0.8045	0.6755	0.0713	1		1	1	1	0.9196	0.6827	1	1	1	0.952		1	0.9855	1	1	1	0.9551	0.9026	1	1		0.9486	1	0.84	0.8955	1		1	0.8897		1		0.9022	1	1		0.782	0.8158	1
HES4	4	AD	1.2:1.3	1.1	2	0	0.9738	0.6938	0.084	0.9518	0.9499	0.9589	0.8717	0.8582	0.919	0.5135	0.9139	0.932	0.9424	0.9273	1	0.9285	0.896	0.9089	0.9449	1	0.9508	0.9639	0.9578	0.9474	0.9555	0.6702	0.9182	0.9067	0.9398	0.9243	0.741	0.867	0.799	0.969	0.9645	0.9724	0.8614	1	0.859	0.9668	0.8857	0.9435	0.9548
HES4	5	ES	1.3	1.1	2	0	0.9825	0.6379	0.0632	0.9518	0.9229	0.9695	0.8977	0.9695	0.9027	0.9418	0.8781	0.9342	0.916	0.8853	1	0.9087	0.8914	0.865	0.9555	1	0.9389	0.9221	0.9519	0.9426	0.9816	0.8751	0.9595	0.951	0.9646	0.9446	0.7463	0.7548	0.9354	0.9534	0.9072	0.9685	0.9439	1	0.8969	0.9776	0.9537	0.9645	0.9785
HES4	6	RI	1.2	1.1	1.3	0	0.9738	0.8923	0.1558	0.5146	0.6432	0.4216	0.4549	0.1836	0.5659	0.0754	0.6191	0.5215	0.6059	0.6508	0.6236	0.5948	0.5297	0.6222	0.4691	0.4961	0.5801	0.7058	0.5429	0.544	0.314	0.2357	0.3399	0.3736	0.4117	0.4556	0.544	0.7019	0.239	0.6386	0.7466	0.5556	0.2932	0.323	0.4285	0.4216	0.3064	0.4181	0.3465
C1orf159	10	AT	10.2			0	1	0.6594	0.0496	0.0276	0	0.0711	0.017	0.0388	0.0218	0.0765	0.0166	0	0.0363	0.0411	0.1223	0.0876	0.0154	0.014	0.077	0	0.0541	0.0374	0.0226	0	0	0.0345	0.027	0.0863	0.0977	0	0	0.0441	0.0911	0.084	0	0	0.1053	0	0.0438	0.0649	0.066	0	0.146
C1orf159	11	AT	12			0	1	0.6594	0.0496	0.9724	1	0.9289	0.983	0.9612	0.9782	0.9235	0.9834	1	0.9637	0.9589	0.8777	0.9124	0.9846	0.986	0.923	1	0.9459	0.9626	0.9774	1	1	0.9655	0.973	0.9137	0.9023	1	1	0.9559	0.9089	0.916	1	1	0.8947	1	0.9562	0.9351	0.934	1	0.854
C1orf159	12	RI	11.2	11.1	11.3	0	0.9529	0.8341	0.1524	0.933	0.7025	0.7436	0.8604	0.5986	0.8873	1	0.8682	0.9307	0.7962	0.653	0.7991	0.9307	0.8744	0.7732	0.7737	0.5186	0.8744	0.7726	0.6762	0.9019	0.6969	0.5458	0.6351	0.8214	1	0.8637	0.7885	0.8703	0.7425	0.7939	1	0.8762	0.7768	0.3671	0.6851	0.7322	1	0.7322	0.6177
C1orf159	13	AD	11.2:11.3	11.1	12	0	0.9808	0.963	0.1782	0.7696	0.5708	0.4925	0.61	0.4531	0.491	0.3597	0.5043	0.6584	0.4648	0.4752	0.8338	0.9351	0.8014	0.5282	0.4855	0.4037	0.4875	0.5708	0.4487	0.4667	0.5838	0.7092	0.6977	0.5109	0.6009	0.7016	0.7417	0.4756	0.8783	0.5863	0.7761	0.6781	0.2878	0.1476	0.6176	0.4763	0.1543	0.354	0.4605
C1orf159	14	ES	11.3	11.1	12	0	0.8674	1	0.1853	0.2211	0.3869	0.2711	0.2118	0.3783	0.1283	0	0.1424	0.1401	0.1889	0.3577	0.6045	0.535	0.3999	0.2885	0.2429	0.4363	0.1297	0.2974	0.3113	0.1176	0.3537	0.6733	0.6287	0.204	0	0.318	0.4412	0.1237	0.7136	0.2881		0.2592	0.1115	0.2265	0.4844	0.2774	0	0.2121	0.4034
C1orf159	15	ES	9	8	10.1	0	0.9145	0.1294	0.0204	0.0407	0	0	0.0158	0	0.0437	0	0.0194		0.0128	0.062	0	0.0422	0	0.0105	0.0224	0	0	0	0	0	0	0	0	0	0	0	0.0407	0	0	0	0	0.0361	0	0.0358	0	0	0	0	0
C1orf159	16	RI	5.4	5.3	5.5	0	0.8045	0.7525	0.1553	1	0.7945	0.8105	0.9132		0.5058	1	1		0.8636	1	1	1	0.9506	0.5682	1	1	0.8315	0.8896	1	1	0.5968	1	0.8267	1	1	1	0.881	1	1	1	1	1	1	0.5968	0.6814	1		1	0.8621
C1orf159	17	RI	5.2:5.3:5.4	5.1	5.5	0	0.815	0.8203	0.1532	1	1	1	1		0.8367	1	1		1	1	1	0.9129	1	1	1	0.54	1	1	1	1		1	1	1	1	1	1	1	1	1	1	1	1		1	1		1	1
C1orf159	20	AA	5.1:5.2:5.3:5.4	4.4	5.5	0	0.9459	1	0.1546	0.1191	0.2083	0.1924	0.3804	0.0075	0.1392	0.4835	0.1242		0.1963	0.2898	0.2843	0.6124	0.3416	0.1093	0.1231	0.2618	0.0935	0.1339	0.0762	0.1777	0.0519	0.5392	0.1575	0.1092	0.3103	0.3073	0.3642	0.1184	0.4659	0.1328	0.2458	0.1997	0.0853	0.0286	0.1242	0.0578		0.0879	0.1433
C1orf159	21	AA	5.3:5.4	4.4	5.5	0	0.7976	0.4109	0.0619	0	0.0827	0	0	0.0119	0.0646		0		0	0.1415		0.2234	0	0.0728	0.0786		0	0.0335	0	0	0.0809		0.1089	0	0	0	0.2748	0.0412		0	0.4109	0	0	0.0452	0	0.029		0.0951	0.0836
C1orf159	22	ES	5.1:5.2:5.3	4.4	5.5	0	0.8168	0.5407	0.0653	0.0581	0.0673	0.0534	0.0612	0	0.128		0		0.049	0			0.0417	0.1776	0		0.0148	0.0205	0	0	0.2431		0.0745	0	0	0	0.0785	0		0		0	0	0.0647	0.0555	0.0391		0	0.0462
C1orf159	23	ES	5.3	4.4	5.5	0	0.7557	0.436	0.0327	0	0.0217	0	0	0	0.0422		0		0	0			0	0.0864	0		0	0.0045	0	0			0.0461	0	0	0		0		0		0	0	0	0	0.0158		0	0.0201
C1orf159	24	ES	5.1	4.4	5.5	0	0.7749	0.3997	0.0688	0	0	0	0	0	0.1098		0		0	0		0.1369	0	0	0	0.1921	0	0	0	0			0	0.0101	0	0		0.0046		0		0.0122	0	0	0	0.0164		0	0.0244
C1orf159	25	RI	4.3	4.2	4.4	0	0.7644	0.6197	0.0606	0.0489	0.0566	0.1026	0.0968	0	0.0846	0.0239	0.2309		0.117	0.2223		0.0968	0.0253	0.0302	0.0392		0.0332	0.0933	0.0501	0.0381		0.087		0.079	0.1639	0.0604	0.4929	0.0663				0	0.0597	0	0.079	0.0467		0.0708	0.0685
TNFRSF18	33	AP	2.1			0	0.8778	0.7516	0.1708	0.581	0.159	0.3693	0.4578	0.1949	0.4051	0.0799	0.182	0.4307	0.4212	0.2633	0.4567	0.3314	0.6713	0.1601	0.3549	0.2516	0.4207		0.4947	0.716	0.2014	0.3428	0.2875	0.1925	0.2246	0.5021	0.1209	0.4031	0.2643	0.0661	0.393	0.2155	0.1195		0.1928	0.1537		0.1412	0.5378
TNFRSF18	34	AP	1			0	0.8778	0.7516	0.1708	0.419	0.841	0.6307	0.5422	0.8051	0.5949	0.9201	0.818	0.5693	0.5788	0.7367	0.5433	0.6686	0.3287	0.8399	0.6451	0.7484	0.5793		0.5053	0.284	0.7986	0.6572	0.7125	0.8075	0.7754	0.4979	0.8791	0.5969	0.7357	0.9339	0.607	0.7845	0.8805		0.8072	0.8463		0.8588	0.4622
TNFRSF18	35	AD	4.2	4.1	5.1	0	0.8237	0.3825	0.0537	1	0.9545	1	1	1	0.9453	1	1	1	0.9658	0.9728	1	0.9447	0.9321	0.9561	1	0.8898	0.9603	0.7078	0.9616		1	1	1	0.9305	1	0.6773		0.9295	0.9292	0.9211	0.8295	1	0.9172		0.8399	0.9447		0.9807	0.8659
TNFRSF18	36	ES	4.1:4.2:5.1	3	5.2	0	0.9634	0.236	0.0209	1	1	1	1	1	0.9916	1	1	1	0.9956	0.9903	1	1	1	0.9942	1	1	1	1	1	0.8844	1	0.9531	1	1	1	1	1	1	1	0.9931	1	1	0.9916	1	1	1	1	1	1
SDF4	38	AT	8.2			0	1	0.0397	0.0051	0.9961	1	0.9946	0.997	0.9971	0.9906	1	1	0.9987	0.9951	0.9863	1	0.9923	0.998	0.991	1	0.9935	0.9956	0.9973	1	0.9943	0.9957	1	0.99	0.994	1	1	1	1	1	1	1	0.9937	0.9988	1	1	0.9967	1	0.9856	0.9888
SDF4	39	AT	5			0	1	0.0397	0.0051	0.0039	0	0.0054	0.003	0.0029	0.0094	0	0	0.0013	0.0049	0.0137	0	0.0077	0.002	0.009	0	0.0065	0.0044	0.0027	0	0.0057	0.0043	0	0.01	0.006	0	0	0	0	0	0	0	0.0063	0.0012	0	0	0.0033	0	0.0144	0.0112
SDF4	40	AA	8.1	7	8.2	0	1	0.1111	0.0169	0.0679	0.078	0.0582	0.0642	0.0165	0.0607	0.0222	0.0339	0.0387	0.0595	0.0347	0.0264	0.0562	0.0706	0.0236	0.0619	0.0532	0.0565	0.0517	0.0719	0.0543	0.0334	0.0277	0.0268	0.0377	0.0376	0.0518	0.0731	0.0679	0.0427	0.0246	0.0444	0.0671	0.0307	0.0271	0.0376	0.0282	0.064	0.0339	0.0362
SDF4	41	AA	6.1	4	6.2	0	0.9983	0.1069	0.0125	0.0123	0.0312	0.0248	0.0327	0.008	0.0254	0.0308	0.0162	0.0106	0.0233	0.0218	0.0293	0.0678	0.0191	0.0119	0.0066	0.0042	0.0073	0.0274	0.0163	0.0494	0.0301	0.0189	0.0084	0.0049	0.0187	0.0122	0.0206	0.0116	0.0202	0.0021	0.0342	0.0337	0.002	0.0054	0.0058	0.0049	0.0034	0.0142	0.0128
UBE2J2	47	ES	6.1:6.2	5	7	0	1	0.7193	0.0446	0.0396	0.0208	0.0562	0.0745	0.0087	0.038	0	0.0303	0.0113	0.0606	0.1477	0.0439	0.0797	0.0785	0.023	0.0151	0.0242	0.0984	0.0723	0.0433	0.0472	0.0813	0.0806	0.0441	0.0662	0.0959	0.0696	0.0453	0.0389	0.0168	0.0347	0	0	0.0151	0.008	0.0123	0.0179	0	0.0086	0.0378
UBE2J2	48	ES	6.1	5	7	0	0.9983	0.2947	0.0429	0.0163	0.0911	0	0.0316	0.0253	0.0211	0.0941	0.0393	0.0844	0.0272	0.1409	0.0633	0.0376	0.0171	0.0585	0.0112	0.0179	0.0812	0.1102	0.0447	0.077	0.0405	0.0269	0	0.0144	0.0615	0.0318	0.0803	0.143	0.0083	0.0852	0.1693	0.1082	0.0834	0.0118	0.0443	0.1098	0.0885	0	0.0539
UBE2J2	52	ES	4	2.1	5	0	1	0.2056	0.0241	0.0329	0.041	0.0768	0.0545	0.0409	0.028	0.0589	0.0351	0.0321	0.069	0.1331	0.107	0.0651	0.0619	0.0229	0.0266	0	0.037	0.0633	0.0613	0.0247	0.0905	0.0283	0.0347	0.0289	0.1119	0.0286	0.1107	0.0466	0.0218	0.1025	0.0178	0.0376	0.0501	0.0548	0.0353	0.0061	0.0202	0.0308	0.0505
UBE2J2	53	ES	2.2:3	2.1	5	0	1	0.2208	0.0181	0.0014	0	0	0.0147	0	0.0183	0.0028	0.0103	0.0215	0	0.04	0.0195	0.021	0.0097	0.0108	0.0105	0.0092	0.0038	0	0.0099	0.0094	0.0172	0.0178	0.0098	0.0194	0.0311	0.0024	0.0213	0	0.0182	0.0141	0.012	0.0083	0.0026	0.0142	0.0046	0.0077	0	0.0048	0.0145
UBE2J2	54	ES	3	2.1	5	0	1	0.1297	0.0168	0.0021	0.0259	0.0261	0	0.0333	0.0277	0.0043	0.0162	0	0.0809	0.0506	0.0282	0.0304	0.0153	0.0156	0.0173	0.0134	0.0067	0.0475	0.0167	0.0136	0.0267	0.0257	0.0158	0	0	0.0035	0.0334	0.0259	0	0.0216	0	0.0121	0.0044	0	0.007	0.0122	0.0099	0.0083	0.021
UBE2J2	55	AD	2.2	2.1	5	0	1	0.1848	0.0235	0.0695	0.0611	0.0171	0.0158	0.0386	0.0348	0.0086	0.0797	0.0253	0.0482	0.0169	0.1418	0.0642	0.0621	0.0368	0.0358	0.081	0.0386	0.0528	0.024	0.0737	0.0642	0.0135	0.0482	0.0138	0.0282	0.0482	0.0229	0.0508	0.0069	0.0455	0.0113	0.0687	0.039	0.009	0.02	0.0611	0.0646	0.0163	0.1045
UBE2J2	63	ES	2.1:2.2	1.1	5	0	0.7644	0.9922	0.2036	1	0.7627		0.1918	0.2071	0.3671		0.8764		0.4054		0.6538	0.7181	0.6817	0.6262	0.685		0.6211	0.6865	0.4858	0.8732	0.8145	0.2833	1	0.2968	0.6783	0.4583		0.7335		0.1427		0.648	0.5138		0.2096	0.558	0.6109	1	0.5751
UBE2J2	65	ES	2.1	1.1	5	0	1	0.3421	0.0274	1	0.9852	0.9728	0.9334	0.9112	0.9399	0.9841	0.9904	0.9864	0.957	0.984	0.9415	0.9737	0.9731	0.9806	0.9857	1	0.9807	0.9822	0.9804	0.9883	0.9855	0.9592	1	0.9613	0.989	0.9538	0.891	0.9826	1	0.9188	0.952	0.9685	0.9709	1	0.9728	0.9567	0.9714	1	0.9223
UBE2J2	66	AD	1.2	1.1	2.1	0	0.9791	0.2234	0.0239	0.0042	0.0099	0.0142	0.0098	0.0938	0.0225	0.0457	0.0318	0.0131	0.0608	0.0199	0	0.0044	0.0225	0.0065	0.0071	0	0.0081	0.0338	0.0131	0.0211	0.006	0.0076	0.0054	0.0166	0.0091	0.0544	0.0414	0.0748		0.0211	0	0.0273	0.0584	0	0.0287	0	0.0938	0.0446	0.0038
ACAP3	74	ES	21	20	22	0	0.9913	0.1874	0.0368	0.9503	0.9643	0.9842	0.9526	0.9866	0.959	1	0.9446	0.9557	0.9929	0.9584	0.8749	0.9888	0.9885	0.9746	0.9349	0.9741	0.981	0.9831	0.9264	0.9845	0.9119	0.9886	0.835	0.9764	0.9555	0.9641	0.9433	0.9639	1	0.9483	0.9619	1	0.9605	1	0.9377	0.9547	1	0.9624	0.9404
CPSF3L	80	AA	11.1	10	11.2	0	1	0.5464	0.0797	0.1897	0.1649	0.1983	0.173	0.0453	0.1847	0.1332	0.1213	0.1392	0.3516	0.2285	0.2868	0.2163	0.2306	0.1866	0.2018	0.2292	0.1449	0.1513	0.1626	0.2016	0.1765	0.1983	0.2072	0.2155	0.2564	0.188	0.2619	0.3087	0.2273	0.1188	0.217	0.126	0.0468	0.0486	0.0957	0.1678	0.0588	0.066	0.5572
CPSF3L	81	ES	00:10:11.100000	9	11.2	0	0.9546	0.4399	0.0852	0.9367	0.9247	0.8255	1	1	0.9459	1	1	0.8612	0.9028	1	1	0.9208	0.9561	0.9633	0.9514	0.9026	1	0.8873	0.8573	0.6763	1	0.8387	1	0.9502	0.9626	1	1	0.9139	1	1	0.8776	0.9053	0.8624	1	1	1	0.7068	0.7127	0.938
CPSF3L	82	ES	10	9	11.2	0	0.9983	0.0881	0.0098	0.9916	0.9921	0.9777	1	1	0.9918	1	1	0.9853	0.9707	1	1	0.9891	0.9932	0.9955	0.9937	0.9816	1	0.9879	0.9827	0.9359	1	0.9749	1	0.9923	0.9925	1	1	0.9772	1	1	0.9812	0.9906	0.9962	1	1	1	0.9842	0.9861	0.9612
CPSF3L	83	AA	7.1	6.2	7.2	0	1	0.0866	0.0128	0.9782	0.9851	0.993	0.9858	0.9788	0.9939	0.9221	1	1	0.9876	0.9918	0.9866	0.9777	0.9874	0.986	0.9753	0.9845	0.9863	0.9944	0.9869	0.9837	1	0.9931	0.9765	0.9629	0.992	0.9857	0.971	0.9789	0.9815	0.9823	0.9464	0.9747	0.981	0.9725	0.9732	0.9912	0.959	0.9832	0.984
CPSF3L	84	AA	6.1	5.2	6.2	0	1	0.1931	0.0185	0.9716	0.9608	0.985	0.9836	0.9843	0.9788	0.997	0.9782	0.9651	0.9653	0.9864	0.963	0.9846	0.9873	0.9853	0.9696	0.9877	0.9844	0.9818	0.9904	0.9865	0.9903	1	0.9695	0.9687	0.9753	0.9627	0.9211	0.995	0.9593	0.9906	0.9741	0.9566	0.9922	0.966	0.9794	0.9751	0.9949	1	0.9684
CPSF3L	85	ES	5.1:5.2:6.1:6.2:7.1:7.2:8	4	9	0	0.9599	0.3826	0.027	1	1	1	1	1	1	0.837	1	1	1	1	1	1	1	1	1	1	1	1	1	1	1	1	1	1	1	1	1	1	1	1	1	1	1	1	1	1	1	1	1
CPSF3L	86	ES	5.2:6.1:6.2:7.1:7.2:8	4	9	0	0.9983	0.016	0.0011	1	1	1	1	1	1	0.984	1	1	1	1	1	1	1	1	1	1	1	1	1	1	1	1	1	1	1	1	1	1	1	1	1	1	1	1	1	1	1	1	1
CPSF3L	88	ES	5.2:6.2:7.1:7.2:8	4	9	0	0.8796	0.2843	0.0256	1	1	1	1	1	1		1	1	1	1	1	1	1	1	1		1	1	1	1			1	1	1	1	1		1			1	1	1	1	1			1
CPSF3L	91	ES	5.2:6.1:6.2:7.2:8	4	9	0	0.8691	0.2781	0.0252	1	1	1	1	1	1	0.9801			1	1	1	1	1	1	1	1	1	1	1	1		1	1	1	1	1	1	1	1	1	1	1	1	1	1	1	1	1	1
CPSF3L	94	ES	5.1:5.2:6.1:6.2	4	7.1	0	0.9564	0.3348	0.0269	1	1	1	1	1	0.9528	1	1	1	0.9768	1	1	1	0.9793	1	1	1	1	1	1	1	1	1	1	1	1	1	1	1	1	1	1	1	1	1	1	1	0.8594	1	1
CPSF3L	95	ES	5.2:6.1:6.2	4	7.1	0	0.9983	0.014	0.0016	1	1	1	1	1	0.9867	1	1	1	0.9953	1	1	1	0.9972	1	1	1	1	1	1	1	1	1	1	1	1	1	1	1	1	1	1	1	1	1	1	1	0.9945	1	1
CPSF3L	97	ES	5.2:6.2	4	7.1	0	0.8551	0.3155	0.043	1	1	1	1	1	0.6854		1	1	0.9121	1	1	1	0.8549	1	1		1	1	1	1			1	1	1	1	1		1			1	1	1	1	1			1
CPSF3L	98	AA	5.1	4	5.2	0	0.9983	0.5178	0.0708	0.0955	0.1267	0.0483	0.1061	0.1336	0.2649	0.0908	0.1303	0.126	0.2018	0.1604	0.2621	0.2528	0.1471	0.0957	0.087	0.1274	0.0607	0.106	0.099	0.1377	0.039	0.1944	0.2026	0.1175	0.1598	0.0935	0.1596	0.2479	0.1654	0.0722	0.3679	0.1875	0.0298	0.0161	0.0718	0.088	0.0428	0.1181	0.3075
CPSF3L	120	ES	4:5.1:5.2:6.1:6.2	1	7.1	0	0.7557	0.7004	0.1212	1	1	1	1	0.3085	0.7832	1	1	1	1	1	1	1	1	1	0.7834	1	1	1	1	1		1	1	1	1	1	1	0.9624	1		1	1	0.857		1	0.645	0.6622	1	1
CPSF3L	124	ES	4:5.2:6.1:6.2	1	7.1	0	0.9983	0.0429	0.0038	1	1	1	1	0.9571	0.9841	1	1	1	1	1	1	1	1	1	0.996	1	1	1	1	1	0.9898	1	1	1	1	1	1	0.9937	1	1	1	1	0.9973	1	1	0.9935	0.9884	1	1
CPSF3L	132	ES	4:5.2:6.2	1	7.1	0	0.8866	0.7082	0.0949	1	1	1	1	0.3006	0.6594		1	1	1	1	1	1	1	1	0.924		1	1	1	1			1	1	1	1	1		1		1	1	0.7737	1	1	0.8384			1
CPSF3L	138	ES	2.1:2.2:3	1	4	0	0.9948	1	0.0618	0.0306	0.0089	0.0056	0.0315	0.008	0.1422	0	0.0086	0.0125	0.0221	0.0255	0.0415	0.0213	0.0957	0.0361	0.0527	0.0304	0.0147	0.037	0.0199	0.0335	0.0162	0.0217	0.0259	0.027	0.0165	0.0192	0.006	0.0304	0.0124	0.0164	0	0.0223	0.001	0.0026	0.0089	0.0316	0.004	0.0005	0.0076
CPSF3L	139	ES	2.1:3	1	4	0	0.9843	0.1123	0.0153	0	0	0.0081	0.0237	0	0	0	0	0	0	0	0	0.0486	0.0453	0	0.0394	0.0886	0	0	0	0.0172	0.0078	0	0	0	0	0	0	0	0	0	0	0	0.0022	0	0.0285	0	0.0115	0.0019	0.0086
CPSF3L	140	ES	2.1	1	4	0	0.986	0.2341	0.0349	0.1148	0	0.0172	0	0.0586	0.2088	0	0	0	0	0.0477	0	0.0345	0.2341	0	0	0.0935	0	0.0169	0	0.0096	0.0037	0.0378	0	0	0	0	0	0	0	0	0	0.0774	0.0278	0.0287	0.0147	0.0204	0.0649	0.0027	0.0119
DVL1	141	AD	11.2	11.1	12	0	0.9878	0.8944	0.1676	0.7547	0.8676	0.3707	0.5117	0.6104	0.4773	0.4015	0.6428	0.4316	0.6756	0.6955	0.635	0.2288	0.3648	0.3907	0.7161	0.7607	0.7921	0.5991	0.816	0.5007	0.8033	0.1705	0.7277	0.4928	0.3944	0.7297	0.6273	0.8234	0.2967	0.4648	0.5823	0.6998	0.2216	0.6808	0.3588	0.7759	0.261	0.3292	0.7138
MXRA8	142	AP	1			0	0.9878	0.5077	0.0581	0.016	0.1164	0.0295	0.0164	0.0073	0.0336	0.0072	0.0432	0.1854	0.0064	0.025	0	0.0476	0.0708	0.0149	0.0199	0.0611	0.0226	0.0124	0.0969	0.0906	0.3509	0.005	0.0177	0.0403	0.103	0.1816	0.0764	0.1253	0.0538	0			0.0064	0.0186	0.0012	0.0273	0.0018	0.0805	0.0118
MXRA8	143	AP	2			0	0.9878	0.5077	0.0581	0.984	0.8836	0.9705	0.9836	0.9927	0.9664	0.9928	0.9568	0.8146	0.9936	0.975	1	0.9524	0.9292	0.9851	0.9801	0.9389	0.9774	0.9876	0.9031	0.9094	0.6491	0.995	0.9823	0.9597	0.897	0.8184	0.9236	0.8747	0.9462	1			0.9936	0.9814	0.9988	0.9727	0.9982	0.9195	0.9882
MXRA8	144	AA	11.1	10.2	11.2	0	1	0.1209	0.0139	0.9861	0.9849	0.9797	0.9908	1	0.9905	0.9867	0.986	0.992	0.9815	0.9879	1	0.9918	0.9812	0.9943	0.9827	0.9838	0.9958	0.9957	0.9524	0.9794	0.9847	0.986	0.9786	0.9854	0.9822	0.9881	0.9651	0.9923	0.9896	0.9766	0.959	0.9493	0.9862	0.9712	0.979	0.9811	0.9901	0.9828	0.9727
MXRA8	145	AA	10.1	9	10.2	0	1	0.2232	0.0221	0.0234	0.0232	0.0193	0.0158	0.023	0.0144	0.002	0.0035	0	0.022	0.033	0.0203	0.0205	0.0461	0.005	0.0125	0.0547	0.0203	0.0124	0.0159	0.106	0.0479	0.0293	0	0.0392	0.0154	0.0098	0	0.0315	0.0249	0.0141	0	0	0.0062	0.0219	0.0041	0.0088	0.0084	0.0117	0.0337
MXRA8	146	ES	4	3	5	0	0.9895	0.2831	0.0333	0.9811	1	0.9283	0.9655	0.9862	1	0.9705	0.9848	0.9101	0.9441	0.9728	0.9351	0.9644	0.9769	0.9829	0.9863	1	0.9707	1	0.9054	1	1	0.9646	1	0.9814	0.9848	1	1	0.8671	1	1	1		0.9726	0.8587	0.9647	0.9351	0.9264	1	0.9552
AURKAIP1	147	RI	1.4	1.3	1.5	0	0.9756	0.7409	0.1173	0.235	0.4748	0.2853	0.1844	0.2263	0.1955	0.767	0.3063	0.2327	0.3214	0.3159	0.5307	0.3467	0.1938	0.1547	0.4223	0.1332	0.1374	0.3059	0.314	0.2579	0.2801	0.2563	0.4049	0.3481	0.2366	0.2651	0.3473	0.5548	0.3328	0.1131	0.5978	0.2142	0.2503	0.2021	0.1918	0.5131	0.3438	0.1996	0.2226
AURKAIP1	148	RI	1.3:1.4	1.2	1.5	0	0.9651	0.7386	0.1515	0.841	0.7571	1	0.7056	0.7057	0.5867	1	0.6762	0.5418	0.8458	0.6365	0.8343	0.8557	0.8184	0.4821	0.8442	0.7367	0.7615	0.7112	0.8331	0.7628	0.8961	0.9102	0.6784	0.8311	0.6162	0.815	0.8897	0.8183	0.8755	0.4819	0.8522	0.5791	0.7906	0.7224	0.803	0.8889	1	0.5908	0.7536
AURKAIP1	149	AD	1.3	1.2	1.5	0	0.9738	0.2889	0.0491	0.9607	0.8482	1	0.9472	0.9141	0.888		0.8626	0.8585	0.945	0.8639	0.8823	0.9434	0.9597	0.8747	0.915	0.9616	0.961	0.9021	0.9282	0.9232	0.9716	0.9835	0.8365	0.9263	0.9114	0.9503	0.9674	0.8794	0.9535	0.8835	0.8476	0.877	0.9444	0.9426	0.9612	0.917	1	0.8876	0.923
AURKAIP1	150	RI	1.2:1.3:1.4	1.1	1.5	0	0.986	0.357	0.044	0.0528	0.1355	0.0579	0.0391	0.0985	0.0588	0.2486	0.0683	0.0664	0.0801	0.0599	0.1098	0.077	0.0408	0.0414	0.1129	0.0398	0.0387	0.0668	0.0944	0.0661	0.0893	0.0686	0.0861	0.1057	0.0334	0.0484	0.1261	0.1262	0.1001	0.0391	0.1548	0.0452	0.0598	0.0486	0.0394	0.1787	0.095	0.0607	0.0446
AURKAIP1	151	AD	1.2:1.3	1.1	1.5	0	0.9825	0.4694	0.0583	0.177	0.2027	0.1516	0.2028	0.3607	0.2262	0.0724	0.1606	0.2611	0.1844	0.162	0.1549	0.191	0.1571	0.2137	0.1736	0.2356	0.2067	0.1848	0.1816	0.181	0.3098	0.292	0.1779	0.2435	0.1599	0.1599	0.3778	0.1672	0.2787	0.2143	0.127	0.1681	0.1902	0.2096	0.17	0.1979	0.1989	0.2249	0.1307
AURKAIP1	152	AD	1.2	1.1	1.5	0	0.9843	0.3807	0.0193	0.0071	0.0417	0	0.0113	0.0774	0.0303	0	0.0275	0.0582	0.0105	0.0245	0.0295	0.0184	0.0063	0.0313	0.0156	0.0098	0.0092	0.0205	0.0132	0.015	0.0176	0.0065	0.041	0.0305	0.0157	0.0088	0.025	0.0228	0.0292	0.0272	0.0201	0.0217	0.0106	0.0124	0.0064	0.0171	0	0.0278	0.0097
CCNL2	155	AT	12			0	1	0.7208	0.0939	0.7266	0.7051	0.7181	0.6656	0.4472	0.7467	0.9673	0.7554	0.9208	0.7418	0.7232	0.5809	0.6189	0.6706	0.749	0.6269	0.7605	0.6228	0.6264	0.7375	0.5664	0.83	0.648	0.6162	0.5989	0.6651	0.629	0.6804	0.8195	0.702	0.6612	0.7744	0.7311	0.604	0.5118	0.6727	0.6167	0.6899	0.7572	0.6213
CCNL2	157	AT	6.3			0	1	0.7208	0.0939	0.2734	0.2949	0.2819	0.3344	0.5528	0.2533	0.0327	0.2446	0.0792	0.2582	0.2768	0.4191	0.3811	0.3294	0.251	0.3731	0.2395	0.3772	0.3736	0.2625	0.4336	0.17	0.352	0.3838	0.4011	0.3349	0.371	0.3196	0.1805	0.298	0.3388	0.2256	0.2689	0.396	0.4882	0.3273	0.3833	0.3101	0.2428	0.3787
CCNL2	158	AA	7.1	6.1	7.2	0	0.8621	0.2958	0.0518	1	1	0.9367	0.9922	1	1	1	1	1	1	0.9818	0.9159	1	0.9823	0.965	0.9366	1	0.9622	0.9632	0.7517	0.9934	1	1	1		1	0.9721	0.9716	0.9544	1	1		0.7798		1	1	1	0.9041	0.9521	1
CCNL2	160	ES	6.1:7.1	5	7.2	0	0.9843	1	0.2805	0.7166	0.6466	0.4152	0.8761	0.2746	0.9198	0.8189	0.4072	0.6415	0.732	0.8185	0.9236	0.8974	0.5621	0.6369	0.5806	0.4827	0.4998	0.7949	0.2947	0.8789	0.9063	0.808	0.3902	0	0.8121	0.9476	0.8495	0.8182	0.668	0.8099		0.3679	0	0.4781	0.5805	0.3464	0.4357	0.6018	0.6998
CCNL2	161	ES	6.1:6.2	5	7.2	0	0.9354	0.7118	0.1407	0.1133	0.1113	0.1503	0	0	0.3774	0.0853	0	0.4194	0.1394	0.0978		0.4932	0.0334	0.0987	0.0754	0	0.0694	0.51	0.2093	0	0	0	0.0511	0.1849	0.2341	0.5482		0	0.1718	0		0.1572	0	0	0.0548	0	0.0573	0.2355	0
CCNL2	162	ES	6.1	5	7.2	0	0.9127	0.6342	0.0775	0	0	0.0461	0.0549	0	0	0	0		0	0.0821			0.0225	0.0591	0.0856	0	0.0378	0.1288	0.1203	0.0482	0	0	0	0.0402	0	0.3447	0.1534	0.1799	0	0		0.1453	0	0	0	0	0.0755	0.0721	0
CCNL2	163	AA	4.1	3	4.2	0	1	0.1234	0.0139	0	0	0	0.0206	0.0303	0	0	0.0348	0	0.0177	0.0249	0	0.026	0.0095	0.0119	0.0064	0.0228	0	0.0151	0	0.0105	0.029	0.0174	0	0.0117	0.0055	0.0105	0.0162	0.0299	0.0133	0	0.0392	0	0.012	0.0166	0.0069	0.0126	0	0.0114	0.018
CCNL2	164	AD	1.2	1.1	2	0	0.993	0.1978	0.0213	0.0475	0.0186	0.0093	0.0193	0	0.0044	0.047	0.0093	0.034	0.0139	0.0177	0.0673	0.0185	0.0105	0.0131	0.0168	0	0.0133	0.0135	0.0346	0	0.0759	0.0328	0.0738	0.0111	0.0369	0.0247	0	0	0.058	0.0213	0	0.0363	0.0122	0	0.0464	0.0442	0.0177	0	0.0218
MRPL20	165	AT	4			0	1	0.305	0.0344	0.9444	0.9514	0.9427	0.939	0.9782	0.9509	0.968	0.9654	0.9795	0.9359	0.8882	0.8926	0.8791	0.9171	0.9679	0.9537	0.952	0.9562	0.9348	0.9684	0.944	0.9684	0.9488	0.9346	0.9453	0.9478	0.9596	0.9492	0.974	0.9253	0.9804	0.9607	0.9801	0.9782	0.9881	0.9691	0.976	0.9818	0.9809	0.919
MRPL20	166	AT	3.2			0	1	0.305	0.0344	0.0556	0.0486	0.0573	0.061	0.0218	0.0491	0.032	0.0346	0.0205	0.0641	0.1118	0.1074	0.1209	0.0829	0.0321	0.0463	0.048	0.0438	0.0652	0.0316	0.056	0.0316	0.0512	0.0654	0.0547	0.0522	0.0404	0.0508	0.026	0.0747	0.0196	0.0393	0.0199	0.0218	0.0119	0.0309	0.024	0.0182	0.0191	0.081
ANKRD65	167	ES	2	1.4	3	0	0.897	1	0.1684	0.1735	0.0693	0.0541	0.071	0.0726	0.124		0.045	0.1147		0.0279	0.0403	0.0654	0.1227	0.1787	0.0469	0.1126	0.0547	0.0585	0.0331		0.1178	1	0.1638	0.0985	0.0598	0.0299	0.0676	0.0291	0.2461	0.4564	0.0141	0.0102	0.038	0.0141	0.069	0.0362		0.0446	0.0446
ANKRD65	168	ES	1.4:2	1.3	3	0	0.8551	0.9795	0.2355	0.458	0.2272	0.1964	0.2397	0.2073	0.4884		0.1983	0.5386		0.1107		0.2313		0.4242	0.2159	0.3626	0.1888	0.2136	0.1118		0.4776	1	0.2701	0.3551	0.1765	0.1166	0.3879		0.559	0.5207	0.0852	0.0467	0.161	0.0205	0.1846	0.1514		0.0753	0.1368
ANKRD65	169	AD	1.4	1.3	3	0	0.8447	0.5194	0.0754	0.8261	0.8304	0.8681	0.8536	0.8319	0.9008		0.8646	0.9297		0.8481	0.9623	0.8689	1	0.8028	0.8686	0.859	0.8409	0.8531	0.8219		0.9048		0.7912	0.863	0.8219	0.8391	0.9356	0.8085	0.9124	0.6868	0.8896	0.8284	0.8485	0.6826	0.7847	0.872		0.7116	0.8233
ANKRD65	170	RI	1.2	1.1	1.3	0	0.897	0.8799	0.1664	0.3601	0.6879	0.4738	0.4633	0.4601	0.6026		0.6128	0.5645	0.7413	0.619	0.4863	0.6601	0.3804	0.6173	0.3464	0.3505	0.6122	0.7951	0.6564		0.5957		0.378	0.397	0.7349	0.5135	0.717	0.8308	0.469	0.7413	0.6365	0.4403	0.6873	0.4084	0.413	0.772		0.4583	0.6627
VWA1	171	AA	2.1	1	2.2	0	1	0.0892	0.0109	0.9922	0.9871	0.9702	0.9907	0.968	0.9783	0.9108	0.9857	0.9889	0.9774	0.9909	0.9732	0.9752	0.9951	0.9904	0.9796	0.9969	0.9745	0.9691	0.9814	0.9913	0.9829	1	0.9798	0.9791	0.9669	0.9807	0.9868	0.9742	0.9444	0.9776	1	0.988	0.9887	0.9757	0.9903	0.9806	0.9783	0.9934	0.9829
ATAD3B	172	AT	8			0	0.9983	0.4133	0.0329	0.0242	0.0732	0.0571	0.0263	0	0.0119	0	0.0301	0.0178	0.0184	0.0221	0.017	0.0537	0.0318	0.0212	0.0085	0	0.0077	0.0131	0.0176	0	0.0045	0.1172	0	0.0518	0.0226	0.0445	0.0458	0.0187	0.0242	0.0184	0	0.0273	0.0101	0	0.0235	0	0	0.0153	0.042
ATAD3B	173	AT	17			0	0.9983	0.4133	0.0329	0.9758	0.9268	0.9429	0.9737	1	0.9881	1	0.9699	0.9822	0.9816	0.9779	0.983	0.9463	0.9682	0.9788	0.9915	1	0.9923	0.9869	0.9824	1	0.9955	0.8828	1	0.9482	0.9774	0.9555	0.9542	0.9813	0.9758	0.9816	1	0.9727	0.9899	1	0.9765	1	1	0.9847	0.958
ATAD3A	174	AP	1			0	0.9773	0.6416	0.0927	0.8437	0.8977	0.7544	0.7723	0.9125	0.8616	0.9485	0.8424	1	0.763	0.8288	0.86	0.8535	0.7659	0.8156	0.826	0.7108	0.8702	0.9136	0.9784	0.9784	0.7022	0.9047	0.7659	0.8702	0.7814	0.8404	1	0.879	0.6635	0.7544		0.7491	0.9422	1	0.8866	0.8908	0.9807	0.9047	0.908
ATAD3A	175	AP	2			0	0.9773	0.6416	0.0927	0.1563	0.1023	0.2456	0.2277	0.0875	0.1384	0.0515	0.1576	0	0.237	0.1712	0.14	0.1465	0.2341	0.1844	0.174	0.2892	0.1298	0.0864	0.0216	0.0216	0.2978	0.0953	0.2341	0.1298	0.2186	0.1596	0	0.121	0.3365	0.2456		0.2509	0.0578	0	0.1134	0.1092	0.0193	0.0953	0.092
ATAD3A	176	AA	4.1	3	4.2	0	0.9913	1	0.1865	0.4113	0.3759	0.399	0.4447	0.0528	0.5388	0.1833	0.4549	0.6306	0.3642	0.5641	0.4867	0.7299	0.792	0.3746	0.5483	0.639	0.3648	0.2593	0.3889	0.1789	0.4732	0.4887	0.623	0.4266	0.4314	0.4945	0.5029	0.3951	0.7092	0.2944	0.2778	0.4957	0.05	0.3128	0.354	0.2438	0.0538	0.2649	0.5073
SSU72	179	AT	2.2			0	1	0.454	0.0488	0.1005	0.0828	0.1154	0.157	0.0339	0.1068	0.0177	0.0503	0.0353	0.0658	0.1691	0.0981	0.0642	0.0494	0.0334	0.0636	0.0541	0.0621	0.0701	0.4612	0.0226	0.0436	0.08	0.0895	0.0675	0.0364	0.0379	0.0487	0.0348	0.0482	0.0178	0.0906	0.0434	0.0139	0.088	0.0146	0.0796	0.0404	0.0255	0.1189
SSU72	180	AT	5			0	1	0.454	0.0488	0.8995	0.9172	0.8846	0.843	0.9661	0.8932	0.9823	0.9497	0.9647	0.9342	0.8309	0.9019	0.9358	0.9506	0.9666	0.9364	0.9459	0.9379	0.9299	0.5388	0.9774	0.9564	0.92	0.9105	0.9325	0.9636	0.9621	0.9513	0.9652	0.9518	0.9822	0.9094	0.9566	0.9861	0.912	0.9854	0.9204	0.9596	0.9745	0.8811
MIB2	181	AP	2			0	0.9773	0.7182	0.1134	0.2696	0.1767	0.3956	0.2474	0.2968	0.2714	0.4482	0.3594	0.2296	0.2082	0.1841	0.4666	0.2678	0.145	0.3265	0.1872	0.1787	0.2656	0.3515	0.4321	0.122	0.2839	0.5327	0.289	0.4102	0.1342	0.2818	0.5181	0.3683	0.5958	0.1028	0.1598	0.2607	0.244	0	0.2667	0.3869	0.7182	0.2476	0.2176
MIB2	182	AP	4			0	0.9773	1	0.1011	0.0815	0.0564	0.1144	0.0748	0	0.0694	0	0.0531	0.0278	0.228	0.204	0.1379	0.1781	0.1598	0.0347	0.0474	0.0679	0.0589	0.036	0.05	0.0325	0.0657	0.1417	0.1691	0.0606	0.1249	0.111	0.0861	0.0662	0.0466	0	0.1061	0	0.0374	0.0519	0.1091	0.0147	0	0.1235	0.1206
MIB2	183	AP	1			0	0.9773	1	0.1307	0.595	0.7436	0.4523	0.5914	0.667	0.6018	0.4533	0.5655	0.6967	0.483	0.5276	0.367	0.3983	0.6496	0.5813	0.6673	0.6972	0.6268	0.5234	0.456	0.7651	0.6368	0.2963	0.4911	0.4456	0.6377	0.5383	0.3602	0.5436	0.319	0.7277	0.6463	0.5603	0.636	0.9481	0.6017	0.5255	0.2514	0.5948	0.6419
MIB2	184	AP	3.1			0	0.9773	0.3526	0.0591	0.0539	0.0233	0.0378	0.0865	0.0362	0.0574	0.0985	0.0219	0.0459	0.0808	0.0843	0.0285	0.1558	0.0455	0.0574	0.098	0.0561	0.0487	0.0891	0.0619	0.0805	0.0136	0.0293	0.0508	0.0835	0.1032	0.0688	0.0356	0.0219	0.0385	0.1695	0.0878	0.179	0.0825	0	0.0225	0.0729	0.0304	0.034	0.0199
MIB2	188	RI	19.2	19.1	19.3	0	0.8464	0.1954	0.0123	1	1		1	1	1	1	1	1	1	1	1	1	1	1	1	1	1	1	1	1	1	1	1	1	1	1	1	1	1	1			1		1	1	1	1	1
MIB2	189	ES	19.1:19.2:19.3	18	20	0	0.9476	0.2601	0.03	1	1	1	1	1	1	1	1	1	1	1	0.9411	1	1	1	1	1	1	0.9641	1	1	1	1	1	1	1	1	0.9565	1	1	1		1	0.9543		1	1	1	1	0.8683
MIB2	191	RI	12.2	12.1	12.3	0	0.9546	0.4752	0.0751	0.1378	0.1413	0.1692	0.0946	0.0328	0.1032	0.0569	0.2136	0.2005	0.1991	0.1855	0.2832	0.0955	0.1085	0.0479	0.092	0.0675	0.083	0.0889	0.0416	0.0684	0	0.122	0.1125	0.1329	0.1802	0.1003	0	0.0686	0.072		0	0.0437	0.0123	0	0.0213	0.031	0.0153	0.0471	0.1451
MIB2	192	ES	11	10.2	12.1	0	0.9843	0.1811	0.0234	1	0.953	0.9867	1	1	0.9816	0.8189	0.981	1	0.982	1	1	0.9882	1	0.9755	0.9735	1	1	0.9956	0.9535	0.9669	1	0.955	1	0.9829	0.9741	0.987	0.9222	0.9786	1	1	0.9486	0.9037	0.9292	0.9733	0.9787	1	0.9591	1	0.9767
MIB2	193	AA	10.1	9	10.2	0	0.9668	0.3275	0.0413	0.9629	0.9023	0.9759	0.9044	0.9064	0.9581	0.9558	0.971	0.8042	0.9436	0.8756	0.9436	0.9523	0.9029	0.9285	0.9596	0.9337	0.898	0.9287	1	0.9667	1	1	1	1	0.9814	1	1	0.9805	1	1	0.8982	0.9566	0.9893	0.9565	0.9826	0.9565	0.971	1	0.9135
MIB2	194	ES	10.1:10.2	9	11	0	0.9843	0.2178	0.0243	0.9853	1	0.9856	0.9825	0.9543	0.9787	0.9783	0.9606	0.9725	0.9654	1	1	1	0.9882	0.9627	0.9877	0.9711	0.9772	0.9899	1	0.9365	0.9782	1	0.978	0.9824	1	0.9855	1	0.9624	1	1	1	1	0.9264	1	0.9889	0.9833	0.9797	1	1
MIB2	196	ES	8	7	9	0	0.9948	0.2345	0.0302	0.9553	0.981	0.987	0.9872	1	0.99	0.9606	1	0.9813	0.9914	1	0.9735	1	0.9957	0.9565	0.9747	0.9766	0.9829	0.9811	1	1	0.9764	0.9847	0.9489	0.9716	0.977	0.9868	1	0.9771	1	0.9466	0.9535	1	0.9814	1	0.969	0.9736	1	1	0.9753
MIB2	197	AD	5.4	5.3	6	0	0.8551	0.3152	0.0644	0.9167	0.9393	1	0.9422		1	1	0.9137	0.8907	0.9266	1	0.8029	0.8968	0.9843	0.9631	0.9072	0.9244	1	0.8594	0.867	1	1	1	0.8129	0.9448	1	1		1	1				0.9619	0.8176	0.9072	1	0.9393	0.8029	0.9514
MIB2	198	AD	5.3:5.4	5.2	6	0	0.9668	0.7099	0.1305	0.8962	0.854	0.771	0.6841	1	0.822	0.5852	0.8581	0.7184	0.844	0.8327	0.6791	0.7038	0.8629	0.7897	0.6803	0.8365	0.8657	0.7772	0.7496	0.5649	0.6766	0.8097	0.785	0.8678	0.6666	0.8853	0.6339	0.7562	0.9184		1	1	0.8567	0.6531	0.7214	0.7669	0.9483	0.8843	0.7713
MIB2	200	AA	5.1	3.2	5.2	0	0.8394	0.9118	0.1383	0.5752	0.7659	0.7719	0.7614	0.4482	0.6464	0.539	0.7804	0.6123	0.5752	0.7032		0.8519	0.5038	0.5983	0.5752	0.5038	0.7303	0.7537		0.8441	0.9312	1	0.6123	0.5647	0.5752	0.5423	0.5199	0.5087	0.5038				0.4293	0.6435	0.6701	0.587	0.3882		0.7421
MMP23B	201	RI	3.6	3.5	3.7	0	0.9058	0.3112	0.0305	0.0155		0.0139	0.0235	0.0249	0.0249		0.0108	0.0914	0.0821	0.0428	0.0465	0.0198	0.0384	0.0486	0	0.0781	0	0.0515		0	0.0544	0.0131	0		0.0712	0		0.0396	0	0.1183	0.3112	0.1194	0.0202		0.0261	0.0712	0	0	0.021
MMP23B	202	RI	3.4	3.3	3.5	0	0.9407	1	0.1341	0.159	0.3352	0.2553	0.1706	0.0576	0.1895	0.372	0.1469	0.1486	0.3374	0.3178	0.2481	0.2308	0.1647	0.3471	0.106	0.3548	0.1549	0.2937		0.3438	0.2449	0.1949	0.2094	0.5095	0.3392	0.2376	0.2996	0.4231	0.3548	0.1014	0.359		0.0678		0.1319	0.2481		0.1176	0.3023
MMP23B	203	RI	3.2	3.1	3.3	0	0.8778	0.5317	0.0648	0.1075	0.5317	0.0921	0.112	0.199	0.1072	0.2341	0.0904	0.152	0.1341	0.1034		0.1768	0.169	0.1591	0.2147	0.1957	0.0638	0.155		0.2211	0.0864	0.1243	0.3212		0.2119					0.1686			0.1569		0.097	0.2015		0.1711	0.075
CDK11B	204	AP	1			0	1	0.2228	0.0295	1	1	0.9468	0.9622	0.8977	0.8836	0.8778	0.9208	1	0.9244	1	1	0.9563	0.9771	0.9418	0.9766	1	0.956	0.9862	0.9729	0.977	1	0.9817	0.9486	0.9281	1	0.9736	0.9486	0.9625	1	1	1	0.9148	0.9876	1	0.9561	0.9791	1	0.9667	0.9588
CDK11B	205	AP	2			0	1	0.2228	0.0295	0	0	0.0532	0.0378	0.1023	0.1164	0.1222	0.0792	0	0.0756	0	0	0.0437	0.0229	0.0582	0.0234	0	0.044	0.0138	0.0271	0.023	0	0.0183	0.0514	0.0719	0	0.0264	0.0514	0.0375	0	0	0	0.0852	0.0124	0	0.0439	0.0209	0	0.0333	0.0412
SLC35E2B	207	ES	2	1	3	0	0.9895	0.8519	0.1621	0.1598	0.6419	0.6425	0.6259	0.3979	0.3243	0.2177	0.3843		0.7229	0.474	0.9119	0.4609	0.4876	0.6915	0.4912	0.3429	0.3461	0.8217	0.5208	0.5271		0.7473	0.4487	0.3947	0.6526	0.4047	0.6849	0.371	0.5344	1	0.3827	0.4768	0.7446	0.3114	0.5319	0.3179	0.4505	0.3947	0.4124
CDK11A	208	AP	1			0	0.9721	0	0	1	1	1	1	1	1	1	1	1	1	1	1	1	1	1	1	1	1	1	1	1	1	1	1	1	1	1	1	1	1			1	1	1	1	1	1	1	1
CDK11A	210	AP	2.1			0	0.9721	0	0	0	0	0	0	0	0	0	0	0	0	0	0	0	0	0	0	0	0	0	0	0	0	0	0	0	0	0	0	0	0			0	0	0	0	0	0	0	0
CDK11A	211	AT	12.2			0	1	0	0	0	0	0	0	0	0	0	0	0	0	0	0	0	0	0	0	0	0	0	0	0	0	0	0	0	0	0	0	0	0	0	0	0	0	0	0	0	0	0	0
CDK11A	212	AT	20			0	1	0	0	1	1	1	1	1	1	1	1	1	1	1	1	1	1	1	1	1	1	1	1	1	1	1	1	1	1	1	1	1	1	1	1	1	1	1	1	1	1	1	1
CDK11A	213	AD	11.2	11.1	12.1	0	0.9913	0.5817	0.0716	0.8434	0.9072	0.9392	0.8592	1	0.8492	0.7144	0.8525	0.7972	0.9801	0.8694	0.8635	0.8758	0.8594	0.9504	0.8934	0.8038	0.9295	0.8025	0.9018	0.6125	0.8699	0.7791	0.843	0.794	0.9319	0.924	0.8991	0.9087	0.7162	1	0.8637	0.7927	0.9529	1	0.9379	0.9167	0.9863	0.8245	0.869
CDK11A	214	AD	7.2	7.1	8	0	0.9581	0.7148	0.1011	0.3525	0.306	0.2104	0.3611	0.278	0.3122	0.2759	0.2042	0.1477	0.316	0.2634	0.3022	0.4879	0.2313	0.217	0.2634	0.3477	0.2248	0.353	0.1947	0.137	0.7236	0.2729	0.4192	0.3986	0.3995	0.2796	0.217	0.2192	0.2443				0.2603	0.1721	0.1426	0.2905	0.2252	0.217	0.2573
CDK11A	216	ES	6.2	5	7.1	0	0.993	0.3105	0.0336	0.9125	0.9475	0.951	0.9848	0.979	0.9685	1	0.9865	1	0.9136	0.9523	0.9517	0.9896	0.9718	0.9809	0.9922	0.972	0.9808	0.9646	0.9623	0.9086	0.9445	0.9801	0.9651	0.9449	0.9674	0.894	0.9325	0.9542	0.9556	0.7731	1	0.882	0.9948	1	0.9868	0.9864	0.9796	1	0.8824
CDK11A	217	AA	6.1	5	6.2	0	0.9895	0.1737	0.0179	0.0188	0.0154	0.0278	0.0162	0.0397	0	0.0149	0.0282	0	0.0148	0	0	0.0144	0.0203	0.0155	0.0049	0.0408	0.0266	0.0231	0.0179	0.0088	0.0669	0.0141	0	0.0069	0.0222	0	0.0734	0.0242	0.0157	0.0711	0	0.0521	0.0192	0	0.0269	0.0077	0	0.0245	0.0291
CDK11A	218	AD	4.2	4.1	5	0	0.9913	0.6909	0.0995	0.6619	0.7704	0.653	0.5705	0.5793	0.5479	0.594	0.7671	0.9269	0.638	0.6123	0.5986	0.4136	0.5727	0.6523	0.5943	0.9471	0.6967	0.8173	0.6911	0.5168	0.5787	0.5863	0.6242	0.5429	0.6546	0.5496	0.7261	0.4995	0.6351	1		0.5625	0.6095	0.7392	0.6783	0.6587	0.6137	0.6629	0.7357
CDK11A	220	AD	2.3:2.4	2.2	3	0	0.9878	0.4179	0.0612	0.1186	0.0426	0.0328	0.099	0.0451	0.2553	0.0691	0.2452	0.0415	0.2616	0.0873	0.1827	0.1968	0.1637	0.1217	0.0565	0	0.0788	0.0288	0.0381	0.0801	0.078	0.095	0.1495	0.1401	0.0688	0.0818	0.0681	0.133	0.1855			0	0.0121	0.0529	0.0109	0	0	0	0.1125
CDK11A	221	ES	2.4	2.2	3	0	0.9965	0.5093	0.0999	0.2344	0.3341	0.2317	0.1815	0.4543	0.2589	0.0559	0.1314	0.192	0.307	0.119	0.4433	0.0584	0.1523	0.3301	0.1706	0.1671	0.1164	0.2622	0.1646	0.124	0	0.1326	0.2347	0.2682	0.2156	0.1994	0.164	0.1058	0			0.2081	0.2642	0.1791	0.1087	0.1401	0.0469	0.274	0.1462
SLC35E2	222	AT	8			0	1	0.8176	0.1584	0.4841	0.5776	0.3177	0.3379	0.6999	0.5053	0.444	0.5977	0.9543	0.6086	0.2962	0.4893	0.2729	0.4202	0.6349	0.6776	0.2978	0.265	0.6813	0.3991	0.4136	0.7356	0.5957	0.4774	0.4152	0.4841	0.5466	0.4732	0.5029	0.5673	0.6868	0.774	0.7696	0.4042	0.3909	0.5496	0.433	0.3596	0.641	0.3083
SLC35E2	223	AT	7			0	1	0.8176	0.1584	0.5159	0.4224	0.6823	0.6621	0.3001	0.4947	0.556	0.4023	0.0457	0.3914	0.7038	0.5107	0.7271	0.5798	0.3651	0.3224	0.7022	0.735	0.3187	0.6009	0.5864	0.2644	0.4043	0.5226	0.5848	0.5159	0.4534	0.5268	0.4971	0.4327	0.3132	0.226	0.2304	0.5958	0.6091	0.4504	0.567	0.6404	0.359	0.6917
SLC35E2	224	ES	2	1	3	0	0.7818	0.9452	0.2519		1	0.7473	0.7356	0.549	0.566	0.3784			1	0.439	1	0.3235	0.8	0.623	0.7229		0.7229	0.8829	0.6349	0.1917		1	0.785	0.4651	0.4889	1	0.3429	0.439				0.6392	0.6987		1	0.1481	1		0.7013
NADK	225	AP	3			0	0.9983	0.7244	0.1356	0.3371	0.3413	0.336	0.3479	0.421	0.4433	0.5964	0.4716	0.2679	0.5827	0.3046	0.1349	0.3051	0.4734	0.3336	0.4084	0.5701	0.199	0.6023	0.3569	0.2542	0.2285	0.208	0.4669	0.1592	0.3157	0.3695	0.3138	0.2217	0.5255	0.6272	0.322	0.4268	0.4469	0.257	0.4912	0.6517	0.6797	0.2539	0.3918
NADK	226	AP	8			0	0.9983	0.8202	0.1306	0.1183	0.442	0.0869	0.2681	0.1707	0.1635	0.2708	0.2452	0.5516	0.2355	0.5904	0.37	0.3115	0.2391	0.1668	0.4133	0.0572	0.1995	0.1822	0.1253	0.4557	0.4009	0.2137	0.2836	0.0724	0.1662	0.1336	0.3356	0.5147	0.1456	0.1467	0.2011	0.2727	0.1389	0.1675	0.1191	0.147	0.0447	0.1225	0.3329
NADK	227	AP	2			0	0.9983	0.3594	0.0484	0.1019	0.0448	0.0225	0.052	0.0238	0.0763	0	0	0.0454	0.0673	0.0737	0.0311	0.0235	0.0674	0.0513	0.0603	0.1379	0.0481	0.0527	0.0755	0.0692	0	0	0.0456	0.0225	0.0401	0.0853	0.0759	0.0866	0	0	0.0902	0.1957	0	0	0.0227	0	0	0.0403	0.0524
NADK	228	AP	1			0	0.9983	0.8693	0.1639	0.4427	0.1718	0.5546	0.332	0.3845	0.3169	0.1328	0.2833	0.1352	0.1146	0.0314	0.464	0.3599	0.2201	0.4482	0.1181	0.2349	0.5533	0.1628	0.4423	0.2209	0.3706	0.5783	0.2039	0.7459	0.478	0.4116	0.2747	0.177	0.329	0.2261	0.3867	0.1048	0.4142	0.5756	0.367	0.2013	0.2756	0.5833	0.223
NADK	229	ES	9.2:10.1	9.1	10.2	0	0.9983	0.3776	0.053	0.0831	0.0447	0.0472	0.0891	0.0443	0.1004	0.0116	0.1296	0.0468	0.087	0.1461	0.2016	0.1004	0.1071	0.0725	0.037	0.0966	0.0641	0.0721	0.0562	0.1813	0.1725	0.1309	0.0823	0.0689	0.189	0.077	0.1472	0.1586	0.1614	0.0878	0.1873	0.1174	0.012	0.0075	0.0965	0.0562	0	0.0373	0.113
NADK	230	ES	06:07:00	5	9.1	0	0.9965	0.1843	0.0175	0.0337	0.0099	0.0118	0.0152	0.0023	0.0345	0.0013	0.0114	0.0053	0.0242	0.0374	0.0428	0.0531	0.0343	0.0077	0.0026	0.0076	0.0182	0.0167	0.0097	0.0087	0.0132	0.0283	0.041	0.0236	0.0284	0.0188	0.0196	0.0073	0.015	0.0215	0.0665	0.0069	0.0013	0	0.0067	0	0.0012	0.0074	0.0683
GNB1	231	ES	2	1	3	1	0.9686	0.1534	0.0238	0.9344	0.9227	0.9418	0.9575	0.9496	0.9157	0.9449	0.9196		0.8684	0.9116	0.938	0.927	0.9258	0.8981	0.9395	0.9462	0.9384	0.9222	0.9119	0.9176		0.9066	0.9217	0.9268	0.9763	0.9368		0.9209		0.8999		0.9467	0.9283	0.9466	0.9204	0.9051	0.863	0.937	0.9297
PRKCZ	235	AP	8			0	0.9686	0.8628	0.1911	0.0368		0.048	0.0479	0.0309	0.0676	0	0	0.6791	0.0224	0.1015	0	0.0527	0.0137	0.1299	0.4307	0	0	0.1921	0	0.4141	0.0588	0.0295	0.089	0	0	0.1944	0.3469	0.2104	0	0			0.1592	0	0.1145	0.1023		0.0676	0
PRKCZ	236	AP	6			0	0.9686	0.2112	0.0207	0		0	0	0	0	0	0	0	0	0.017	0.1122	0	0.0367	0	0.0036	0	0	0.0102	0.0209	0	0.0197	0	0	0	0	0	0	0	0	0			0	0	0	0		0	0
PRKCZ	237	AP	7			0	0.9686	0.5976	0.0544	0.0161		0	0.0139	0	0	0	0	0	0.0195	0	0	0.0689	0	0	0.0071	0	0	0	0	0	0	0.0515	0.0776	0	0	0	0	0	0	0			0.0116	0	0	0		0	0
PRKCZ	238	AP	11			0	0.9686	0.3731	0.0687	0.0488		0.0954	0.0423	0	0	0	0	0.1588	0.0593	0.0673	0	0.1048	0.0725	0.1148	0.0646	0	0.0951	0.0402	0.0412	0.0323	0.039	0.0783	0	0	0	0.0429	0.1893	0	0.0832	0			0	0.1293	0.0304	0.0678		0	0.1998
PRKCZ	239	AP	5			0	0.9686	0.2554	0.0282	0.0161		0	0.0279	0.0406	0	0	0	0	0.0098	0.0111	0.0732	0.0461	0.012	0	0.0059	0	0.0314	0.0066	0.0544	0	0	0.0258	0.0389	0	0	0	0	0	0	0			0	0	0	0		0	0.066
PRKCZ	240	AP	1			0	0.9686	1	0.2159	0.8821		0.8566	0.868	0.9285	0.9324	1	1	0.1621	0.8891	0.8031	0.8146	0.7274	0.8652	0.7554	0.488	1	0.8735	0.7509	0.8835	0.5536	0.8826	0.8149	0.7945	1	1	0.7626	0.4637	0.7896	0.9168	1			0.8292	0.8707	0.8551	0.83		0.9324	0.7342
PRKCZ	243	ES	22	21	23	0	0.9948	0.2507	0.0248	0.0221	0	0.0256	0.0398	0.0242	0.047	0.0089	0.0962	0.0078	0.0323	0.0571	0.0163	0.061	0.0617	0.0121	0.0183	0.0134	0	0.0433	0.0258	0.0582	0.0265	0.0112	0.0301	0.0079	0.0499	0.05	0.0329	0.1067	0.0619	0.0127	0.026	0.0511	0.0032	0	0.0176	0		0.0097	0.0401
C1orf86	244	AP	1			0	0.9791	0.8688	0.0967	0.064	0.0323	0.133	0.0737	0.0262	0.0515		0.1163	0.0127	0.0551	0.0821	0.0351	0.0639	0.074	0.0581	0.028	0.0057	0.0792	0.0146	0.0134	0.0155	0.0083	0.0341	0.0258	0.0333	0.1068	0.015	0.0125	0.004	0.0417	0.0331	0.1096	0.0468	0.0918	0.2073	0.0683	0.1143	0.0174	0.0709	0.0182
C1orf86	245	AP	3			0	0.9791	0.8688	0.0967	0.936	0.9677	0.867	0.9263	0.9738	0.9485		0.8837	0.9873	0.9449	0.9179	0.9649	0.9361	0.926	0.9419	0.972	0.9943	0.9208	0.9854	0.9866	0.9845	0.9917	0.9659	0.9742	0.9667	0.8932	0.985	0.9875	0.996	0.9583	0.9669	0.8904	0.9532	0.9082	0.7927	0.9317	0.8857	0.9826	0.9291	0.9818
C1orf86	246	AT	7.2			0	1	0.6293	0.084	0.6128	0.9008	0.5474	0.5521	0.564	0.6578	0.8955	0.7678	0.5835	0.5378	0.6071	0.5756	0.5711	0.6199	0.6579	0.5441	0.7699	0.6992	0.6373	0.6318	0.6064	0.5443	0.4793	0.5503	0.6537	0.66	0.5938	0.4527	0.6205	0.6262	0.7091	0.5947	0.7471	0.617	0.6971	0.4764	0.5669	0.7948	0.5196	0.4768
C1orf86	247	AT	10			0	1	0.6293	0.084	0.3872	0.0992	0.4526	0.4479	0.436	0.3422	0.1045	0.2322	0.4165	0.4622	0.3929	0.4244	0.4289	0.3801	0.3421	0.4559	0.2301	0.3008	0.3627	0.3682	0.3936	0.4557	0.5207	0.4497	0.3463	0.34	0.4062	0.5473	0.3795	0.3738	0.2909	0.4053	0.2529	0.383	0.3029	0.5236	0.4331	0.2052	0.4804	0.5232
C1orf86	248	ES	6:7.1:8:9	5	10	0	0.9232	1	0.159	0.1492	0.1834	0.2527	0.182	0.1047	0.2008	0.012	0.1971	0.1124	0.1853	0.0652	0.4432	0.1959	0	0.0734	0.4286	0.0951	0.0839	0.2067	0.0869	0.1917	0.1743	0.2156	0.2646	0.0837	0.2485	0.1994	0.2262	0.062	0.3036		0.2113	0.073	0.0674		0.1682	0.0541	0.0323	0.1409	0.1712
C1orf86	249	ES	7.1:8:9	5	10	0	0.9337	1	0.1842	0.1702	0.2121	0.2869	0.2323	0.1203	0.556	0.1922	0.2429	0.1291	0.2101	0.0767	0.5017	0.2218	0	0.0848	0.5113	0.1395	0.2778	0.2706	0.204	0.2375	0.1981	0.266	0.3027	0.0965	0.3198	0.2562	0.2548	0.0725	0.3403	0.1721	0.2568	0.0859	0.1645		0.2846	0.2598	0.2492	0.1617	0.2169
C1orf86	250	ES	6	5	7.1	0	0.9983	0.6399	0.0961	0.4222	0.1884	0.387	0.3931	0.3203	0.2236	0.067	0.2461	0.2832	0.3212	0.2176	0.4181	0.3608	0.3886	0.3359	0.3567	0.4206	0.2363	0.1767	0.3256	0.3584	0.3291	0.4119	0.409	0.3769	0.1952	0.292	0.2377	0.1885	0.2079	0.5976	0.2345	0.4489	0.3546	0.4421	0.3954	0.1937	0.1187	0.1964	0.0999
C1orf86	251	ES	4	3	5	0	0.993	0.1164	0.0191	0.9593	0.9305	0.9622	0.9567	1	0.9638	1	0.9772	0.9793	0.9647	0.9445	0.9167	0.9806	0.982	0.9864	0.9793	0.9862	0.9832	0.956	0.9314	0.9493	0.9834	0.9721	1	0.9807	0.9621	0.9904	0.8969	0.8871	0.979	0.9684	0.9658	0.9746	0.9611	0.9929	0.9962	0.9557	0.9813	0.9888	0.9692
MORN1	252	AT	8			0	0.9616	1	0.2113	0.3636	0.1643	0.1	0.2819	0.2262	0.0844	0.0346	0.2966	0.0184	0.2423	0.2327	0.7749	0.4028	0.7681	0.3737	0.2776	0.424	0.2725	0.6433	0.3906	0.1281	0.0229	0.2827	0.3359	0.0893	0.0821	0.2292	0.3967	0.1646	0.2413	0	0.2305	0.035	0.064	0.0941	0.3656			0.1034	0.7281
MORN1	253	AT	17			0	0.9616	1	0.2296	0.5081	0.4756	0.8391	0.5829	0.4435	0.8247	0.9654	0.6122	0.5779	0.4693	0.3423	0.2251	0.2821	0.129	0.2442	0.573	0.3695	0.1018	0.3129	0.3648	0.5394	0.9771	0.5338	0.3136	0.389	0.7217	0.5647	0.3457	0.8033	0.5048	1	0.6015	0.9139	0.8222	0.7685	0.5032			0.8336	0.2719
MORN1	254	AT	13			0	0.9616	0.8222	0.1316	0.1282	0.3601	0.0609	0.1352	0.3304	0.0909	0	0.0912	0.4036	0.2884	0.425	0	0.3152	0.1029	0.3821	0.1494	0.2065	0.6257	0.0437	0.2446	0.3326	0	0.1835	0.3505	0.5217	0.1962	0.2061	0.2576	0.0321	0.2538	0	0.168	0.051	0.1138	0.1374	0.1312			0.0629	0
MORN1	255	ES	2	1	3	0	0.7504	0.5319	0.1061		0.7857	0.9346	0.8394	1	1	0.8319			0.8582	1	0.8462	0.8684	0.8524	1	0.7674		0.8319	0.8238	0.8049	0.9127				1	0.9034	0.7857		0.7458	0.8462				0.9252	1	0.8773	1		0.8684
RER1	256	AP	1			0	1	0.8694	0.1126	0.8524	0.9105	0.8323	0.7948	0.9246	0.7924	0.9235	0.9221	0.9217	0.7591	0.8469	0.6785	0.7705	0.7941	0.9318	0.9045	0.9059	0.9161	0.8808	0.8584	0.7679	0.8723	0.7889	0.8229	0.8958	0.788	0.8354	0.8366	0.8241	0.8183	0.9774	0.9329	0.9555	0.9669	0.9845	0.9142	0.959	0.9773	0.9743	0.7772
RER1	257	AP	2.1			0	1	0.8694	0.1126	0.1476	0.0895	0.1677	0.2052	0.0754	0.2076	0.0765	0.0779	0.0783	0.2409	0.1531	0.3215	0.2295	0.2059	0.0682	0.0955	0.0941	0.0839	0.1192	0.1416	0.2321	0.1277	0.2111	0.1771	0.1042	0.212	0.1646	0.1634	0.1759	0.1817	0.0226	0.0671	0.0445	0.0331	0.0155	0.0858	0.041	0.0227	0.0257	0.2228
RER1	260	AA	6.1	5	6.2	0	1	0.1041	0.0164	0.0414	0.0816	0.0457	0.0536	0.0285	0.0655	0	0.0428	0.0308	0.0575	0.0523	0.075	0.0525	0.0606	0.0171	0.045	0.036	0.0261	0.0245	0.0493	0.0219	0.0479	0.0443	0.0449	0.0243	0.029	0.0362	0.0421	0.0604	0.0418	0.0197	0.0223	0.0252	0.0363	0.0079	0.0242	0.0248	0.0503	0.04	0.0443
RER1	261	ES	4	3	5	0	1	0.0349	0.0055	0.9813	0.9813	0.9955	0.9951	0.9982	0.9984	1	0.9927	0.9952	0.9922	1	0.9962	0.9976	0.9884	1	0.9949	0.995	0.9984	0.9953	1	0.9832	0.9935	0.9946	0.9983	0.9958	0.9977	0.9937	0.995	0.9976	0.9904	0.9886	0.9933	0.9886	0.9975	1	0.998	0.9941	1	0.9967	1
PEX10	265	AA	7.1	6	7.2	0	0.9773	0.0323	0.0017	1	1	1	1	1	1	1	1	1	1	1	1	1	1	1	1	1	1	1	1	1	1	1	1	1	1	1	1	1	1	1	1	1	1	1	1	1	1	1	1
PEX10	266	AA	5.1	4.2	5.2	0	0.9808	0.4118	0.0535	0.0661	0.1532	0.0838	0.1026	0.0167	0.0902	0.2981	0.0902	0.0858	0.1847	0.0504	0.0902	0.0902	0.1584	0.0642	0.0553	0.0869	0.1082	0.1921	0.136	0.2014	0.0692	0.1082	0.0783	0.0755	0.0154	0.1468	0	0.0937	0.1878	0.1409	0.4118	0.1538	0.1257	0.0976	0.1147	0.0933	0.1234	0.1167	0.1554
PEX10	268	AD	4.2	4.1	5.2	0	0.9825	0.3092	0.0377	0.9768	0.9574	0.9256	1	1	0.9555	1	0.9491	0.9009	1	0.9658	1	0.9813	0.9873	0.962	0.9511	1	0.9228	0.9538	0.9167	1	0.8844	1	0.9327	0.962	0.9238	1	1	0.9199	0.9451	0.9663	0.6908	0.8906	0.957	1	1	0.9451	0.9745	0.9465	0.9546
PEX10	269	ES	2	1	3	0	0.8377	1	0.1507	0.063	0.0313	0.0492	0.1707	0.0891	0.1555	0	0.1116		0.2551	0.1637	0.1186		0.1469	0.0728	0.0665	0.063	0.132	0.0658	0.1124	0.2876	0.1832	0.3658	0.2876	0.0564	0.2441	0.1521		0.063	0.2972	0.0262		0.1856	0.0127	0.1521	0.0616	0.0747	0.0203	0.0823	0.1008
PLCH2	272	AT	23.2			0	0.9738	0.7739	0.1484	0.6409	0.7601	0.4945	0.6361	1	0.8388	1	0.5456	0.8781	0.74	0.5962	0.8303	0.7534	0.5574	0.724	0.6289	0.8478	0.6889	0.6513	0.643	1	0.8661	0.6588	0.5947	0.5705	0.7351	0.7533	1	0.704	0.7153	1	0.6352	0.2261	0.9345	0.7703	0.8649	0.737		0.8093	0.5873
PLCH2	273	AT	22.3			0	0.9738	0.7739	0.1484	0.3591	0.2399	0.5055	0.3639	0	0.1612	0	0.4544	0.1219	0.26	0.4038	0.1697	0.2466	0.4426	0.276	0.3711	0.1522	0.3111	0.3487	0.357	0	0.1339	0.3412	0.4053	0.4295	0.2649	0.2467	0	0.296	0.2847	0	0.3648	0.7739	0.0655	0.2297	0.1351	0.263		0.1907	0.4127
PLCH2	276	ES	4.2:5.1:5.2:6:7:8:9:10:11:12:13:14:15:16:17:18	4.1	19	0	0.8656	0.0273	0.0012	1	1	1	1	1	1	1		1	1	1	1	1	1	1	1	1	1		1			1	1	1	1	1		1	1				1	1	1			1	1
PANK4	282	ES	2.5:3.1	2.4	3.2	0	1	0.0546	0.0092	0.9601	1	1	1	1	1	1	1	1	0.9841	1	1	1	1	1	1	1	1	1	1	1	1	1	0.9785	1	1	1	1	0.9839	1	1	1	1	0.9855	1	1	1	1	1	1
PANK4	283	RI	2.3	2.2	2.4	0	0.9895	0.4689	0.0395	0.0322	0	0.0339	0.0469	0	0.0184	0.0239	0		0.0681	0	0.1288	0.0528	0.0257	0	0.0077	0	0.0488	0.0321	0.0621	0	0.1137	0.0054	0	0.0176	0.0347	0.0624	0.1833	0.0384	0.0527	0.0081		0.0371	0.0129	0	0.0045	0.0155	0.0091	0.0147	0.0705
PANK4	284	AA	2.1	1	2.2	0	0.8656	0.1874	0.0135	0	0	0	0	0	0.1874	0	0.0135		0			0	0	0	0		0	0	0	0			0	0		0		0				0	0.0087		0	0	0.0209	0.0146	0.0198
TNFRSF14	285	AP	1			0	0.9965	0.1916	0.0192	0.0279	0.0105	0.0078	0.0073	0	0.0066	0	0.0334	0	0.0302	0	0	0	0.0066	0.041	0.0051	0	0.0066	0.0206	0.0256	0	0	0	0	0.0223	0.0521	0.0076	0	0.0349	0	0.029	0	0	0	0	0.0155	0	0.1022	0	0.0726
TNFRSF14	286	AP	2.1			0	0.9965	0.1916	0.0192	0.9721	0.9895	0.9922	0.9927	1	0.9934	1	0.9666	1	0.9698	1	1	1	0.9934	0.959	0.9949	1	0.9934	0.9794	0.9744	1	1	1	1	0.9777	0.9479	0.9924	1	0.9651	1	0.971	1	1	1	1	0.9845	1	0.8978	1	0.9274
TNFRSF14	289	AA	7.1	6	7.2	0	0.9983	0.6281	0.1039	0.2642	0.308	0.2307	0.2894	0.0687	0.2992	0.374	0.1945	0.3352	0.4469	0.3781	0.4099	0.4506	0.3599	0.3016	0.2234	0.4008	0.1251	0.2654	0.1594	0.4203	0.182	0.4049	0.3396	0.2001	0.3204	0.2821	0.314	0.297	0.3819	0.102	0.3393	0.1881	0.0954	0.0736	0.1202	0.1457	0.1083	0.1219	0.3447
FAM213B	290	AA	6.1	5	6.2	0	0.9773	0.6584	0.0854	0.5668	0.6835	0.6581	0.7696	0.6844	0.5346	0.6471	0.562	0.6091	0.6945	0.6761	0.7237	0.6573	0.6919	0.6875	0.7002	0.6751	0.4775	0.5683	0.5538		0.6214	0.5735	0.6501	0.5843	0.4231	0.6311	0.5946	0.5766	0.894	0.3607	0.6187	0.399	0.6659	0.6769	0.7423	0.5211	0.7641	0.7674	0.6962
FAM213B	291	ES	5:6.1:6.2	4.2	6.3	0	0.9808	0.0791	0.0061	1	1	1	1	1	1	1	1	1	0.9821	1	1	1	1	1	1	1	1	1	1		1	1	1	1	1	1	1	1	1	1	1	1	1	1	1	1	1	1	1
FAM213B	292	ES	00:05:06.200000	4.2	6.3	0	0.9703	0.1641	0.0107	1	1	1	1	1	1	1	1	1	0.9635	1	1	1	1	1	1	1	1	1	1	1	1	1	1	1	1	1	1	1	1	1	1	1	1	1	1	1	1	1	1
FAM213B	293	AA	4.1	3	4.2	0	0.9686	0.3314	0.0388	0.0377	0.0866	0.0672	0.1049	0.0701	0.068	0.0233	0.0324	0	0.0692	0.1103	0.0584	0.1375	0.0835	0.0771	0.0577	0.0851	0.0156	0.0464	0.0784		0	0	0.0209	0.0572	0.2269	0.0397	0	0.1504	0.1601	0.0566			0.0235	0.0324	0.036	0.0229	0.0342	0.0644	0.0719
ARHGEF16	307	AP	1			0	0.7993	1	0.2176	0.2109	0.6265	0.2422	0.4141	0.7723	0.3879	0.7969	0.3418	0.1457	0.2843	0.4424	0.4197	0.3573	0.1518	0.4287	0.2788	0.4699	0.328	0.2576	0.4265	0.2856	0.7209	0.5102	0.5047	0.6565	0.8497	0.4271	0.5906	0.2438	0.629			0.2078	0.6308		0.2153	0.3484		0.3768	0.2527
ARHGEF16	308	AP	4.1			0	0.7993	0.8345	0.1631	0.4961	0.2454	0.3086	0.2364	0.1722	0.2422	0.2031	0.3049	0.4551	0.4509	0.2402	0.3209	0.2959	0.5416	0.3642	0.421	0.2396	0.317	0.1186	0.4843	0.4439	0.0226	0.2483	0.3335	0.2928	0	0.2032	0.1916	0.4137	0.2551			0.4933	0.1986		0.4994	0.5181		0.2241	0.6311
ARHGEF16	309	AP	3.1			0	0.7993	0.9539	0.1167	0.1764	0.0351	0.2387	0.1143	0.0555	0.1338	0	0.0561	0.2514	0.0726	0.0442	0.1379	0.088	0.1437	0	0.148	0.1544	0.1886	0	0.0892	0.2331	0	0.0533	0.086	0.027	0.1503	0.1964	0	0.2461	0			0.1588	0.1706		0.198	0.1335		0.1444	0.1162
ARHGEF16	310	AP	7			0	0.7993	0.6698	0.1408	0.1167	0.093	0.2105	0.2352	0	0.236	0	0.2971	0.1478	0.1922	0.2731	0.1216	0.2588	0.163	0.207	0.1523	0.1362	0.1663	0.6237	0	0.0374	0.2565	0.1882	0.0758	0.0238	0	0.1733	0.2178	0.0965	0.116			0.1401	0		0.0873	0		0.2547	0
MEGF6	311	AP	1			0	0.8726	0.953	0.2376	0.1906	0.0395	0.1462	0.4276	0.1254	0	0.8604	0.0395		0.0321	0.6664		0.538	0.1476	0.072	0.1478	0.8657	0.1605	0.2108			0.4511	0.953	0.8386	0.0759	0.3217	0.8261		0.1516	0.6313				0.0713	0.5067	0.2269	0		0.7056	0
MEGF6	312	AP	6			0	0.8726	0.953	0.2376	0.8094	0.9605	0.8538	0.5724	0.8746	1	0.1396	0.9605		0.9679	0.3336		0.462	0.8524	0.928	0.8522	0.1343	0.8395	0.7892			0.5489	0.047	0.1614	0.9241	0.6783	0.1739		0.8484	0.3687				0.9287	0.4933	0.7731	1		0.2944	1
MEGF6	313	ES	39	38	40	0	0.9808	0.0294	0.0021	1	1	1	1	1	1	1	1	1	1	1	1	1	1	1	1	1	1	1	1	1	1	1	1	1	1	1	1	1	1	1	1	1	1	1	1	1		1	1
MEGF6	314	ES	00:36:37.100000	35	37.2	0	0.9913	0.1602	0.0089	1	1	1	0.9925	1	1	1	1	1	1	1	1	1	1	1	1	1	1	1	1	1	1	1	1	0.9798	1	1	1	1	0.9621	1	1	1	1	1	1	1		1	1
MEGF6	315	ES	31	30	32	0	0.9616	0.8824	0.1676	0.6903	0.4335	0.8846	0.7257	0.6429	0.7458	0.3269	0.3684	0.7253	0.4253	0.5144	0.3137	0.7079	0.9081	0.6269	0.6154	0.8603	0.6512	0.4505			0.3515	0.7191	0.8527	0.5517	0.6988	0.4622	0.8148	0.3443	0.6552	0.8936			0.7619	0.9242	0.7619	0.9206		0.5185	0.6753
MEGF6	317	ES	1 day, 2:27:00	25	28	0	0.9703	0.3769	0.0546	0.9821	0.8655	0.9707	0.9851	0.9525	0.9458	0.6231	1	1	0.9125	0.8639	1	0.9522	0.9917	1	0.9705	0.9899	1	0.8611	1	1	0.9674	0.9883	0.9679	1	0.8838	1	0.7807	0.8398	0.9084	1			0.9487	1	0.9755	1		1	0.9386
TPRG1L	319	ES	3	2	4	0	1	0.0463	0.0047	1	1	1	1	1	1	1	1	1	1	1	1	0.9914	0.9962	1	1	1	1	1	1	1	1	1	1	1	1	1	1	1	1	1	1	1	1	1	1	1	0.9847	1	1
WRAP73	320	RI	11.2	11.1	11.3	0	0.9965	0.8862	0.1205	0.2788	0.5095	0.4405	0.4168	0.2097	0.4028	0.1584	0.5814	0.3486	0.5261	0.3987	0.4884	0.4655	0.3742	0.4015	0.2738	0.2517	0.2454	0.324	0.3579	0.4055	0.3998	0.6022	0.4414	0.5592	0.3878	0.4245	0.634	0.3926	0.5403	0.3415	0.391	0.4489	0.3569	0.5675	0.25	0.435	0.2527	0.3271	0.5415
TP73	327	ES	13:14:15	12	16	0	0.8185	0.147	0.0091	1	1	1	1	1	1	1	1		1	1	1		1	1	1	1	1	1	1			1	1	1	1	1			1		1		1	1	1	1		1
TP73	332	ES	13	12	14	0	0.7871	0.3659	0.0504	1	1	1	1	1	1	0.7594	1		1	1	1		1	0.8609	1		1		0.7481			1		1	1	1		1	1				0.9541	1	1	1		0.7481
TP73	333	ES	13:14:00	12	15	0	0.7784	0.056	0.0026	1	1	1	1	1	1	1	1		1	1	1		1	1	1		1	1	1			1		1	1	1			1		1		1	1	1	1		1
SMIM1	337	AT	3.2			0	0.9721	0.3343	0.0478	0.0744	0.0558	0.0797	0.1115	0.0637	0.0511	0.0159	0.026	0.0109	0.1004	0.0922		0.1384	0.0588	0.013	0.0542	0.0329	0.0239	0.0523	0.0837	0.0837	0.0355	0	0	0	0.0947	0.0194	0.0502	0.0228	0.2181	0.1127	0.0797	0.0395	0.1356	0.0309	0.0582	0.1004		0.0308	0.0744
SMIM1	338	AT	4			0	0.9721	0.3343	0.0478	0.9256	0.9442	0.9203	0.8885	0.9363	0.9489	0.9841	0.974	0.9891	0.8996	0.9078		0.8616	0.9412	0.987	0.9458	0.9671	0.9761	0.9477	0.9163	0.9163	0.9645	1	1	1	0.9053	0.9806	0.9498	0.9772	0.7819	0.8873	0.9203	0.9605	0.8644	0.9691	0.9418	0.8996		0.9692	0.9256
CEP104	339	AT	23			0	1	0.1472	0.016	1	0.9926	1	0.9806	0.9899	0.9899	1	0.9601	0.991	0.9827	1	0.9863	0.9601	0.9955	0.9742	0.9779	1	0.9936	0.985	0.9784	0.9933	1	0.9881	0.985	0.9878	0.9796	0.9935	1	0.9697	0.9853	1	1	0.9892	1	1	0.976	0.9745	1	1	0.9479
CEP104	340	AT	7			0	1	0.1472	0.016	0	0.0074	0	0.0194	0.0101	0.0101	0	0.0399	0.009	0.0173	0	0.0137	0.0399	0.0045	0.0258	0.0221	0	0.0064	0.015	0.0216	0.0067	0	0.0119	0.015	0.0122	0.0204	0.0065	0	0.0303	0.0147	0	0	0.0108	0	0	0.024	0.0255	0	0	0.0521
AJAP1	352	AT	6			0	0.8464	0.9582	0.3073	0	0	0	0.2867	0	0	0	0.7412	0	0		0	0.3529	0.5277	0.8208	0		0	0.574	0	0.7135	0	0	0.7333	0.647	0.7493		0	0			0		0.6658	0	0	0	0	0	0
AJAP1	353	AT	7			0	0.8464	0.9582	0.3073	1	1	1	0.7133	1	1	1	0.2588	1	1		1	0.6471	0.4723	0.1792	1		1	0.426	1	0.2865	1	1	0.2667	0.353	0.2507		1	1			1		0.3342	1	1	1	1	1	1
NPHP4	355	ES	20	19	21	0	0.7504	0.8313	0.0819	0.0725	0.0219	0	0.0348	0.1563	0.1581		0.0589		0.105		0.1901	0.105	0.0247	0.2068	0.0376		0.0725	0.105		0.1353				0.1234	0.0324	0.0725		0.0324					0.0145		0.0192	0	0		0.0944
NPHP4	357	ES	00:13:14.100000	11	14.2	0	0.8115	0.2885	0.0397	0.8726	1	1	0.7569	1	1	1	1		0.9289	1		1	0.9587	1	0.919			0.9495						1		1		1					1	1	1	1	1		1
NPHP4	358	ES	12:13:00	11	14.2	0	0.815	0.3121	0.0395	0.9066	1	1	0.9403	1	1	1	1		0.9231	1	1	1	0.9724	1	0.9503	1	1	0.8736	1	1	1		1	1	1			1	1				1		1		1		1
NPHP4	359	ES	7	6	8	0	0.9127	0.354	0.0458	1	0.8937	0.9215	1	1	1	1	1		1	1	0.7012	1	1	1	1	1	0.9072	1	1	1		1	1	1	1	1		0.7012					1	1	1	1	1	1	1
KCNAB2	360	AP	2			0	0.9791	1	0.1326	0.0814	0.292	0.0724	0.1979	0.1096	0.2628	0.1877	0.0719	0.5807	0.1317	0.1532	0.0797	0.2053	0.1258	0.1617	0.0954	0.1194	0.2005	0.0578	0.0726		0.1532	0.0169	0.2134	0.0971	0.1899	0.1395	0.0235		0.1943	0.3027	0.193	0.5596	0.0947	0.2656	0.2456		0.2679	0.2656	0.2071
KCNAB2	361	AP	3			0	0.9791	1	0.1543	0.9186	0.6649	0.9276	0.7788	0.7951	0.6863	0.8123	0.9281	0.3211	0.8624	0.8468	0.9054	0.7947	0.7747	0.8383	0.9046	0.8806	0.7762	0.8796	0.9138		0.8468	0.9831	0.7866	0.8653	0.6999	0.8605	0.9765		0.8057	0.6973	0.7087	0.4404	0.887	0.7344	0.7544		0.5848	0.7344	0.7929
KCNAB2	362	AP	7			0	0.9791	0.6514	0.0608	0	0.0131	0	0.0233	0	0	0	0	0	0	0	0	0	0	0	0	0	0	0	0		0	0	0	0	0	0	0		0	0	0.0984	0	0	0	0		0	0	0
KCNAB2	363	AP	4			0	0.9791	0.1198	0.013	0	0	0	0	0	0	0	0	0.0982	0.0059	0	0.015	0	0	0	0	0	0	0.0122	0.0136		0	0	0	0	0	0	0		0	0	0	0	0	0	0		0	0	0
KCNAB2	364	AP	1			0	0.9791	0.383	0.0417	0	0.0299	0	0	0.0954	0.0508	0	0	0	0	0	0	0	0.0995	0	0	0	0.0233	0.0503	0		0	0	0	0.0376	0.1102	0	0		0	0	0	0	0.0183	0	0		0.1473	0	0
KCNAB2	367	RI	22.2	22.1	22.3	0	0.993	1	0.1264	0.1485	0.1652	0.1533	0.283	0.0596	0.2203	0.1747	0.1104	0.5122	0.2686	0.2458	0.2914	0.4154	0.3259	0.1186	0.1703	0.2332	0.1009	0.208	0.1125	0.3946	0.5659	0.3347	0.1805	0.1861	0.2412	0.3898	0.3284	0.3627	0.3201	0.2369	0.2566	1	0.0315	0.0461	0.0779	0.1038	0.0178	0.0562	0.1916
KCNAB2	368	ES	16	15	17	0	0.9232	0.1325	0.0172	0.0073	0.0089	0.0077	0.0248	0	0	0.0503	0		0	0	0.0176	0.0621	0.0305	0	0		0.0219	0	0.0258			0.0451	0.0523	0	0	0		0	0	0			0		0	0	0	0	0
KCNAB2	370	ES	13:14:15:17:18:19:21:22.1:22.2:22.3	12	22.4	0	0.8988	0.6559	0.0646	0.9272	1	1	1		1	1	1	1	1	1	1	1	1	1	1	1	1	1	1	1	1	1	1	1	1	1	1	1	1	1	1	1	0.3441		1			1	1
KCNAB2	372	ES	13:14:15:17:18:19:21:22.1:22.3	12	22.4	0	1	0.0688	0.0043	0.9934	1	1	1	1	1	1	1	1	1	1	1	1	1	1	1	1	1	1	1	1	1	1	1	1	1	1	1	1	1	1	1	1	0.9894	1	1	1	1	1	1
KCNAB2	374	ES	6	5	9	0	0.8656	0.9466	0.1196	0.5139	0.5301	0.339	0.3449	0.2888	0.4037	0.5339	0.1724		0.2733		0.311	0.3259	0.4609	0.5752	0.5538		0.3233	0.2529	0.4444			0.3259	0.4482	0.3794		0.3472							0.3459	0.2888	0.4362		0.1841	0.4821	0.311
RPL22	377	AP	3.1			0	1	0	0	0	0	0	0	0	0	0	0	0	0	0	0	0	0	0	0	0	0	0	0	0	0	0	0	0	0	0	0	0	0	0	0	0	0	0	0	0	0	0	0
RPL22	378	AP	1			0	1	0.0527	0.0057	0.0022	0.0046	0.0032	0.0019	0.0022	0.0024	0.0015	0.0027	0.0085	0.0011	0.0034	0.0012	0.0032	0.0037	0.0021	0.0083	0.006	0.0022	0.0112	0.0004	0.0026	0.0067	0.0059	0.0067	0.0019	0.002	0.0048	0.0083	0.0031	0.0032	0.0026	0.0003	0.0011	0.0025	0.0011	0.0005	0.0032	0.0002	0.001	0.0253
RPL22	379	AP	2			0	1	0.0527	0.0057	0.9978	0.9954	0.9968	0.9981	0.9978	0.9976	0.9985	0.9973	0.9915	0.9989	0.9966	0.9988	0.9968	0.9963	0.9979	0.9917	0.994	0.9978	0.9888	0.9996	0.9974	0.9933	0.9941	0.9933	0.9981	0.998	0.9952	0.9917	0.9969	0.9968	0.9974	0.9997	0.9989	0.9975	0.9989	0.9995	0.9968	0.9998	0.999	0.9747
RPL22	380	AT	6			0	1	0.0044	0.0003	0	0	0	0	0	0	0	0	0	0	0	0	0.0007	0	0	0.0004	0	0	0	0	0	0	0	0	0	0	0.0002	0	0	0	0	0.0009	0.0003	0	0	0.0003	0	0	0.0004	0
RPL22	381	AT	5			0	1	0.0044	0.0003	1	1	1	1	1	1	1	1	1	1	1	1	0.9993	1	1	0.9996	1	1	1	1	1	1	1	1	1	1	0.9998	1	1	1	1	0.9991	0.9998	1	1	0.9997	1	1	0.9996	1
RNF207	382	ES	11:12:00	10	13	0	0.8185	0.4713	0.0393	1		1	1		1		1		0.9442	1	1	1	1	1	0.9291	1	1	0.956	1	0.9491	1	1	1	1		0.8677	1	1	1	1			1	1	1	1		0.7564	1
ICMT	385	ES	03:04:00	2	5	0	0.9983	0.6149	0.1091	0.7812	0.8554	0.8412	0.8985	0.8098	0.7118	0.6831	0.9147		0.9213	0.9432	0.9194	0.9792	0.9086	0.9208	0.9163	0.8657	0.9556	0.9529	0.957	0.8262	1	0.9314	0.9234	0.8836	0.9369	0.842	1	0.9519	1	1	0.5799	0.6616	0.8957	0.4974	0.8974	0.8589	0.5251	0.9489	0.8739
ICMT	386	ES	4	2	5	0	1	0.2862	0.0351	0.901	0.9187	0.9293	0.9634	0.9693	0.896	0.7663	0.9737	1	0.9716	0.9842	0.9713	0.989	0.9802	0.964	0.9666	0.9321	0.9763	0.9768	0.991	0.9506	1	0.9758	0.9751	0.9694	0.9794	0.951	1	0.9897	1	1	0.7138	0.938	0.971	0.9284	0.9684	0.9712	0.9048	0.9793	0.9543
ICMT	387	ES	3	2	4	0	0.9983	0.6145	0.082	0.311	0.3842	0.3154	0.2807	0.1367	0.2618	0.4103	0.2487		0.2935	0.2337	0.2816	0.3791	0.1895	0.3357	0.311	0.3657	0.3776	0.3613	0.1998	0.2281	0.1014	0.2863	0.2566	0.219	0.2716	0.2438	0.2495	0.1959	0.1841	0.1447	0.4066	0.1322	0.2285	0.0828	0.2516	0.174	0.1189	0.3201	0.2795
ACOT7	388	AP	3			0	0.9948	0.7895	0.0705	0.1586	0	0	0.0441	0	0	0.0225	0	0	0.0637	0	0.0438	0	0	0.0296	0	0	0.0109	0	0.0357	0	0	0	0	0.0257	0	0	0	0	0.0538	0.0531	0	0	0.0147	0.0244	0	0	0	0.0518	0
ACOT7	389	AP	1.1			0	0.9948	0.9611	0.1875	0.43	0.3996	0.1986	0.4444	0.6742	0.3503	0.4317	0.5762	0.5788	0.1776	0.3185	0.2577	0.5892	0.5689	0.287	0.5809	1	0.3446	0.7513	0.5255	0.4053	0.9553	0.3633	0.4976	0.0893	0.2462	0.5429	0.6337	0.4782	0.3002	0.1975	0.7251	0.3587	0.2625	0.102	0.1927	0.5138	0.2328	0.3507	0.8262
ACOT7	390	AP	4			0	0.9948	0.7777	0.175	0.3718	0.0302	0.3961	0.1142	0.1279	0.1699	0.1526	0.2171	0.1409	0.1353	0.0074	0.1368	0.1341	0.2499	0.1054	0.1306	0	0.0912	0.0695	0.2424	0	0	0.2821	0.0826	0.6456	0.0752	0.1066	0.1803	0	0	0.1117	0.0488	0	0.2144	0.4101	0.2062	0.0255	0.0157	0.4246	0.0777
ACOT7	391	AP	2			0	0.9948	0.9549	0.2152	0.0397	0.5702	0.4053	0.3973	0.1979	0.4798	0.3933	0.2067	0.2803	0.6234	0.6741	0.5618	0.2766	0.1812	0.578	0.2885	0	0.5534	0.1792	0.1964	0.5947	0.0447	0.3546	0.4198	0.2394	0.6786	0.3505	0.186	0.5218	0.646	0.6377	0.2261	0.6413	0.5084	0.4635	0.6011	0.4607	0.7515	0.1728	0.0961
ACOT7	392	AT	10			0	1	0.5168	0.0511	0.032	0.0454	0.0332	0.0837	0.0231	0.045	0.0496	0.0629	0.0477	0.0525	0.1947	0.0445	0.2541	0.087	0.0404	0.078	0.0965	0.0514	0.0582	0.0395	0.1041	0.0168	0.0824	0.0584	0.0355	0.1083	0.0531	0.0926	0.1046	0.0404	0.0082	0.0267	0.003	0.0396	0.0305	0.0228	0.0527	0.0242	0.0159	0.0494
ACOT7	393	AT	14			0	1	0.5168	0.0511	0.968	0.9546	0.9668	0.9163	0.9769	0.955	0.9504	0.9371	0.9523	0.9475	0.8053	0.9555	0.7459	0.913	0.9596	0.922	0.9035	0.9486	0.9418	0.9605	0.8959	0.9832	0.9176	0.9416	0.9645	0.8917	0.9469	0.9074	0.8954	0.9596	0.9918	0.9733	0.997	0.9604	0.9695	0.9772	0.9473	0.9758	0.9841	0.9506
ACOT7	395	ES	12.1:12.2	11	13	0	0.986	0.0548	0.0079	0.0056	0.0048	0.0113	0	0.0051	0	0	0.0123	0	0.0046	0	0	0	0.0096	0	0.0069		0	0.0036	0	0	0	0	0	0	0	0	0	0	0	0	0	0.0043	0	0	0	0.0056	0	0.0021	0.0043
ACOT7	396	ES	12.2	11	13	0	0.986	0.0403	0.0034	0	0	0	0	0.008	0	0	0	0	0	0	0	0	0	0	0		0	0.0056	0	0	0	0	0	0.0022	0	0	0	0	0	0	0	0	0	0	0	0	0	0.0033	0
ACOT7	397	ES	1.2:5	1.1	6	0	0.9843	0.0185	0.0008	1	1	1	1	1	1	1	1	1	1	1	1	1	1	1	1	1	1	1	1	1	1	1	1	1	1	1	1	1	1	1	1	1	1	1	1	1	1	1	1
HES2	400	AT	4.3			0	1	0.6437	0.111	0.667	0.4948	0.6392	0.6537	0.7028	0.4913	0.5209	0.4736	0.5168	0.5304	0.438	0.5439	0.5061	0.5281	0.5645	0.468	0.4302	0.5976	0.4086	0.3659	0.9358	0.4403	0.579	0.5396	0.6456	0.4725	0.6105	0.4433	0.681	0.5886	0.2921	0.3962	0.3684	0.7914	0.6125	0.4276	0.5283	0.6212	0.4881	0.4602
HES2	401	AT	5			0	1	0.6437	0.111	0.333	0.5052	0.3608	0.3463	0.2972	0.5087	0.4791	0.5264	0.4832	0.4696	0.562	0.4561	0.4939	0.4719	0.4355	0.532	0.5698	0.4024	0.5914	0.6341	0.0642	0.5597	0.421	0.4604	0.3544	0.5275	0.3895	0.5567	0.319	0.4114	0.7079	0.6038	0.6316	0.2086	0.3875	0.5724	0.4717	0.3788	0.5119	0.5398
TNFRSF25	409	RI	6.4	6.3	6.5	0	0.8796	0.147	0.0111	1	1	1	1		1	1	1	1	1	1	1	1	1	1	1		1	1	1	1	1	1	1	1	1	1	1	1	1	1	1	1	1		1	1	0.8627	1	1
TNFRSF25	410	RI	6.3:6.4	6.2	6.5	0	0.9267	0.9189	0.1649	0.8302	0.9125	0.7761	0.7563		0.8766	0.3481	0.7054	0.8482	0.7949	0.6702	0.8507	0.829	0.8616	0.7228	0.6576	0.5828	0.7516	0.7077	0.7723	0.6886	0.6063	0.7364	0.7715	0.8553	0.8482	0.9514	0.8878	0.8534	0.8029	0.2215	0.7539	0.8956	0.2917	0.4822	0.5866	0.4965	0.5476	0.7516	0.787
TNFRSF25	412	ES	6.3:6.4:6.5:7.1	6.2	7.2	0	0.9354	0.2569	0.0372	1	1	1	1	1	1	0.7785	1	1	0.9554	1	1	0.9868	1	1	1	1	1	1	0.9767	0.8687	1	1	1	0.9702	1	1	1	1	1	0.9343	1	1	0.8933	1	1	1	1	1	0.982
TNFRSF25	415	ES	6.1:6.2:6.3:6.4:6.5:7.1	5	7.2	0	0.7836	0.5027	0.0746	1	1	1	1		1	0.4973	1	1	0.9808	1	1	1	1	1	1		1		1	1	1	1	1	1	1	1	1	1	1	1	0.7899	1			1	1		1	0.9278
TNFRSF25	416	ES	6.2:6.3:6.4:6.5:7.1	5	7.2	0	0.8709	0.3376	0.0518	1	1	1	1	1	1	0.8731	1	1	0.9859	1	1	1	1	1	1		1	1	1		1	1	1	1	1	1		1	1	1	0.7216	1	1		1	1	1	1	0.9179
TNFRSF25	425	AA	6.1:6.2:6.3:6.4	5	6.5	0	0.7609	0.9059	0.1333	1	1	0.6906	1		1			0.8184	0.8698	1	0.9632	0.8692	1	0.5521	0.7927		0.8677		0.8815	1	1	0.9045	1	1	1	1	0.9068	0.9591	1	0.5996	1	1	0.4478		0.8922	0.5987		0.9075	0.9655
TNFRSF25	426	AA	6.2:6.3:6.4	5	6.5	0	0.8569	0.6137	0.1001	1	1	0.7787	1		1	1	1	0.9471	0.9006	1	0.9441	0.8612	1	0.8007	0.9105		0.9171	0.9025	0.9339		1	0.9617	1	1	1	1	0.3902	0.9535	1	0.8655		1	0.864		0.958	0.8938	0.8209	0.9335	0.9602
TNFRSF25	432	ES	5:6.2:6.3:6.4:6.5:7.1:7.2	4	8	0	0.911	0.0567	0.004	1	1	1	1	1	1	1	1	1	1	1	1	1	1	1	1		1	1	1		1	1	1	1	1	1	1	1	1	1	1	1	1		1	1	1	1	1
TNFRSF25	436	ES	5:6.2:6.5:7.1:7.2	4	8	0	0.7731	0.1412	0.0092	1	1	1	1		1	1	1	1	1	1	1	1	1	1	1	1	1	1	1		1	1	1	1	1			1		1		1	1	1	1	1	1	1	1
TNFRSF25	443	ES	3:4:5:6.2:6.3:6.4:6.5:7.1	2	7.2	0	0.918	0.1865	0.018	0.943	1	1	1	1	1	1	1	1	1	1	1	1	1	1	1		1	1	1		1	1	1	1	1	1	1	1	1	1	1	1	1	1	1	1	1	1	1
TNFRSF25	451	ES	3:4:5:6.2:6.5:7.1	2	7.2	0	0.836	0.4351	0.0381	0.8233	1	1	1		1	1	1	1	1	1	1	1	1	1	1	1	1	1	1		1	1	1	1	1			1	1	1		1	1	1	1	1	1	1	1
TNFRSF25	461	ES	3	2	4	0	0.9354	0.1744	0.0215	1	1	1	0.986	1	1	0.9008	1	1	0.9794	1	0.972	1	0.9425	1	1	0.8369	1	1	0.972	1	1	1	1	0.9695	1	1	1	0.9342	1	1	1	1	0.9829	1	1	1	1	1	0.9804
PLEKHG5	472	RI	27.2	27.1	27.3	0	0.9895	0.3731	0.0279	1	0.9903	1	1	0.9502	1	1	1	0.9692	1	1	1	0.9841	1	1	0.9812	1	0.9901	1	1	1	0.9702	0.9841	1	1	0.9711	1	1	0.9618	1	1	1	0.9715	0.9824	0.9491	0.9621	0.9902	0.9665	1	0.9907
PLEKHG5	473	AA	27.1:27.2:27.3	26	27.4	0	0.9965	0.4392	0.025	1	0.9912	1	1	1	1	1	0.9638	1	1	0.962	1	1	0.9888	1	1	1	0.9913	1	1	1	1	1	1	1	1	1	1	1	1	1	1	1	1	1	1	0.9908	1	1	0.9907
KLHL21	477	AP	1			0	0.9948	0.1539	0.0115	0	0	0	0	0	0	0	0	0	0	0	0	0	0	0	0	0	0	0	0	0	0	0	0	0	0	0	0	0	0	0	0	0	0	0	0	0	0	0	0
KLHL21	478	AP	2			0	0.9948	0.1539	0.0115	1	1	1	1	1	1	1	1	1	1	1	1	1	1	1	1	1	1	1	1	1	1	1	1	1	1	1	1	1	1	1	1	1	1	1	1	1	1	1	1
KLHL21	481	RI	4.2	4.1	4.3	0	1	0.4255	0.0777	1	0.9188	0.836	1	0.909	0.762	1	1	1	1	1	0.971	1	0.9001	0.9155	0.9093	1	1	1	1	1	1	1	1	1	1	0.8713	0.9095	1	1	1	1	1	0.8298	1	0.8832	1	0.5745	1	1
KLHL21	482	RI	4.2:4.3	4.1	4.4	0	1	0.9186	0.157	0.3901	0.3826	0.2737	0.3591	0.2765	0.546	0.1395	0.484	0.7963	0.3279	0.5828	0.449	0.448	0.2821	0.1857	0.2637	0.1759	0.2295	0.2	0.2521	0.5527	0.789	0.5434	0.4561	0.3599	0.5576	0.3531	0.5784	0.4905	0.5055	0.6439	0.6609	0.5193	0.1713	0.2539	0.3523	0.3171	0.1004	0.365	0.3916
KLHL21	483	AA	4.3	4.1	4.4	0	0.9389	0.3036	0.0282	0	0.0329	0.0408	0	0.0325	0.1435	0	0		0	0	0.0187	0	0.0236	0.0103	0.0329	0	0	0	0	0		0	0	0	0	0.0599	0.1059	0	0				0.031	0	0.0399	0	0.0719	0	0
THAP3	486	AT	7			0	1	0.5231	0.0773	0.4674	0.3967	0.3666	0.3869	0.4432	0.5269	0.4854	0.5265	0.4923	0.3724	0.4508	0.4583	0.455	0.3362	0.4031	0.3614	0.3771	0.4288	0.3532	0.4683	0.4098	0.5341	0.461	0.4605	0.4475	0.3808	0.4478	0.5337	0.5567	0.4247	0.2045	0.3151	0.2355	0.3504	0.2086	0.4249	0.3381	0.414	0.3744	0.4482
THAP3	487	AT	6			0	1	0.5231	0.0773	0.5326	0.6033	0.6334	0.6131	0.5568	0.4731	0.5146	0.4735	0.5077	0.6276	0.5492	0.5417	0.545	0.6638	0.5969	0.6386	0.6229	0.5712	0.6468	0.5317	0.5902	0.4659	0.539	0.5395	0.5525	0.6192	0.5522	0.4663	0.4433	0.5753	0.7955	0.6849	0.7645	0.6496	0.7914	0.5751	0.6619	0.586	0.6256	0.5518
THAP3	488	AA	5.1	4.2	5.2	0	0.9738	0.2876	0.0267	0.0388	0	0.0232	0.0325	0	0.0271	0	0	0	0	0.0796	0.0346	0	0.0203	0.0172	0.0379	0	0.028	0.028	0.0156	0.0453	0.2876	0.128	0.0301	0.0214	0.0943	0.0429		0	0	0	0	0.0416	0.0325	0	0.0109	0	0	0	0
THAP3	489	AA	4.1	3	4.2	0	0.9721	0.4629	0.0753	0.8657	0.9427	0.8435	0.7074	0.7514	0.9427	0.8286	0.8131	0.9312	0.7343	0.7303	0.7822	0.9263	0.8693	0.9046	0.9765	1	0.8713	0.8627	0.9164	0.7343	0.858	1	0.7303	0.7437	0.8212	0.8012	0.7437	0.7632		0.8231	0.897	0.85	0.8627	0.9471	0.7611	0.8564	0.909	0.8587	0.7343
DNAJC11	491	AP	2			0	0.9948	0.4061	0.0294	0	0	0	0	0	0	0.0905	0	0	0	0	0.0267	0	0	0	0	0	0.0113	0	0	0	0	0	0	0	0	0	0	0	0	0	0	0	0	0	0	0	0	0	0
DNAJC11	492	AP	1			0	0.9948	0.4061	0.0294	1	1	1	1	1	1	0.9095	1	1	1	1	0.9733	1	1	1	1	1	0.9887	1	1	1	1	1	1	1	1	1	1	1	1	1	1	1	1	1	1	1	1	1	1
DNAJC11	495	ES	12	11	13	0	1	0.0826	0.0127	0.9865	0.9852	0.9668	0.9857	0.9792	0.9807	1	0.9812	1	0.9925	1	0.9882	1	0.9938	0.9936	0.993	1	0.9946	0.9825	0.9931	0.9928	1	0.9741	0.9814	0.9903	1	1	1	0.9938	0.982	1	1	1	0.9916	0.9785	0.9813	0.9793	0.9733	0.9816	0.9925
DNAJC11	496	ES	9.2:10:11:12:13:14:15:16:17.1	9.1	17.2	0	1	0.1049	0.0112	0.9873	0.9801	1	1	0.991	1	0.9933	0.982	1	0.9933	0.9771	0.9882	0.9901	1	0.9941	0.9762	0.975	0.9899	0.9789	0.9934	0.9921	0.9847	0.9912	0.9903	1	1	0.9909	0.9814	1	1	1	1	1	0.9957	0.9743	0.9943	0.9929	0.9812	1	0.9918
DNAJC11	498	ES	4	3	5	0	1	0.0712	0.0103	1	1	1	1	1	1	1	1	1	1	0.9532	1	0.9808	1	0.9886	1	1	1	1	0.9869	1	1	1	0.9549	1	0.9702	1	0.9486	1	0.9631	1	1	1	1	1	1	0.9903	1	1	1
CAMTA1	501	AT	26			0	1	0.3061	0.0436	0.0605	0.0265	0.0989	0.0542	0.0072	0.0869	0.1778	0.0478	0.0276	0.0727	0.1146	0.0183	0.058	0.0664	0.0704	0.0549	0.02	0.0155	0.0137	0.005	0.0044	0.0212	0.0374	0.201	0.1212	0.0206	0.0331	0.0171	0.006	0.0638	0.0156	0.0109	0.0049	0.0782	0.0293	0.048	0.0439	0.0069	0.049	0.062
CAMTA1	502	AT	5			0	1	0.4025	0.0642	0.7508	0.7377	0.7054	0.7841	0.8441	0.7611	0.7233	0.8001	0.7477	0.7244	0.7438	0.835	0.7669	0.8007	0.8387	0.796	0.8472	0.7789	0.8839	0.8664	0.8987	0.8469	0.8888	0.6751	0.7953	0.8381	0.8457	0.8879	0.7515	0.8006	0.9319	0.847	0.8857	0.7779	0.7369	0.8544	0.8379	0.8283	0.825	0.7631
CAMTA1	503	AT	6			0	1	0.3219	0.0501	0.1888	0.2358	0.1957	0.1617	0.1487	0.152	0.0989	0.1522	0.2246	0.2029	0.1415	0.1467	0.1751	0.1329	0.0909	0.149	0.1328	0.2056	0.1023	0.1286	0.0969	0.1319	0.0737	0.1238	0.0835	0.1413	0.1211	0.0951	0.2425	0.1356	0.0525	0.142	0.1094	0.1439	0.2339	0.0976	0.1182	0.1649	0.126	0.175
CAMTA1	506	ME	2|3	1	4	0	1	0.2368	0.0141	0	0.0055	0.0159	0.0095	0	0.0168	0	0.004	0.0073	0.0121	0.0122	0.018	0.0056	0.0015	0.008	0.0037	0	0.0056	0	0.0175	0	0.0031	0.0148	0.0029	0.0138	0.0038	0.0027	0.0129	0.0204	0.0345	0.0034	0.0123	0.0023	0.0153	0	0.0105	0.0075	0.0109	0.0146	0.0226
CAMTA1	507	ES	3	1	4	1	0.9913	0.4545	0.046	0.8535	0.8327	0.8808	0.8558	0.8463	0.8244	0.8092	0.8716	0.8987	0.8759	0.83	0.8507	0.8464	0.8993	0.8526	0.877	0.8614	0.8555	0.8494	0.8104	0.9799	0.7934	0.8432	0.8382	0.8049	0.8337	0.8426	0.8969	0.8869	0.9407	0.9379	0.8895	0.9107	0.9088	0.8389	0.8819	0.8092	0.8729	0.8059	0.7413
CAMTA1	508	ES	2	1	4	1	0.9773	0.5051	0.0574	0	0.0269	0.1066	0.0537	0	0.0741	0	0.0268	0.0609	0.0795	0.057	0.0948	0.0303	0.0136	0.0443	0.0255	0	0.0325	0	0.0706		0.0118	0.0749	0.0149	0.0547	0.0185	0.0145	0.1019	0.1404	0.3618	0.0486	0.0913	0.0234	0.1339	0	0.0732	0.031	0.0703	0.0581	0.062
VAMP3	509	AP	1			0	1	0.9029	0.107	0.8505	0.9061	0.8543	0.7908	0.7741	0.7111	0.7593	0.8077	0.6642	0.8199	0.6717	0.6169	0.7675	0.8889	0.7261	0.8486	0.7493	0.8539	0.7154	0.7802	0.7314	0.6729	0.7543	0.7825	0.8363	0.7104	0.8605	0.4892	0.7075	0.7874	0.8813	0.8506	0.8402	0.874	0.9004	0.8358	0.7816	0.6949	0.787	0.7069
VAMP3	510	AP	2			0	1	0.9029	0.107	0.1495	0.0939	0.1457	0.2092	0.2259	0.2889	0.2407	0.1923	0.3358	0.1801	0.3283	0.3831	0.2325	0.1111	0.2739	0.1514	0.2507	0.1461	0.2846	0.2198	0.2686	0.3271	0.2457	0.2175	0.1637	0.2896	0.1395	0.5108	0.2925	0.2126	0.1187	0.1494	0.1598	0.126	0.0996	0.1642	0.2184	0.3051	0.213	0.2931
PER3	513	AT	10.2			0	1	0.3275	0.0281	0	0	0.0067	0.0045	0.111	0.008	0	0	0	0	0	0.0306	0.0137	0.0194	0	0.008	0	0.0443	0	0.0232	0.023	0.0201	0	0.0131	0.019	0.0315	0.0521	0	0	0.0724	0	0	0.076	0.0131	0.0192	0.0204	0.0162	0.0234	0	0.0268
PER3	514	AT	22			0	1	0.3275	0.0281	1	1	0.9933	0.9955	0.889	0.992	1	1	1	1	1	0.9694	0.9863	0.9806	1	0.992	1	0.9557	1	0.9768	0.977	0.9799	1	0.9869	0.981	0.9685	0.9479	1	1	0.9276	1	1	0.924	0.9869	0.9808	0.9796	0.9838	0.9766	1	0.9732
UTS2	520	AT	5.2			0	0.925	0.7708	0.1712	0.5022		0.3219	0.487	0.3156	0.2981		0.3498	0.7264	0.3576	0.0949	0.3724	0.355	0.5022	0.4103			0.3096	0	0	0	0.4021	0.3238	0	0.2416	0.3808	0.3353		0.2416	0.4728	0	0.2295	0.2677	0.2655		0.4212	0	0	0.4385	0.1918
UTS2	521	AT	7			0	0.925	0.7708	0.1712	0.4978		0.6781	0.513	0.6844	0.7019		0.6502	0.2736	0.6424	0.9051	0.6276	0.645	0.4978	0.5897			0.6904	1	1	1	0.5979	0.6762	1	0.7584	0.6192	0.6647		0.7584	0.5272	1	0.7705	0.7323	0.7345		0.5788	1	1	0.5615	0.8082
PARK7	523	AP	1.1			0	1	0.1777	0.0147	0.9974	0.9943	1	0.9973	1	1	1	1	0.9937	0.9976	1	0.9943	0.9968	0.9985	0.9965	1	0.9959	0.9987	0.9966	1	0.9985	1	1	1	0.9949	1	1	0.9915	0.9874	1	0.9955	1	0.9983	0.9945	0.9939	0.9954	0.9931	0.9901	0.9947	0.9963
PARK7	524	AP	2.1			0	1	0.1777	0.0147	0.0026	0.0057	0	0.0027	0	0	0	0	0.0063	0.0024	0	0.0057	0.0032	0.0015	0.0035	0	0.0041	0.0013	0.0034	0	0.0015	0	0	0	0.0051	0	0	0.0085	0.0126	0	0.0045	0	0.0017	0.0055	0.0061	0.0046	0.0069	0.0099	0.0053	0.0037
PARK7	526	ES	5	4	6	0	1	0.0116	0.0015	0.9977	0.997	1	0.997	0.9977	1	1	0.9972	1	0.9951	0.999	0.9978	1	0.9978	0.9974	1	1	0.9994	0.9984	0.995	0.9966	0.997	0.9993	0.9952	0.9972	1	0.9977	0.9956	0.9956	0.9955	0.9988	0.9977	0.9977	0.999	0.9982	0.9997	0.9976	0.9976	0.9968	0.9989
PARK7	528	AD	1.2	1.1	3	0	1	0.6019	0.0913	0.6159	0.5903	0.5997	0.5068	0.5641	0.6641	0.5062	0.4223	0.4859	0.4961	0.621	0.4161	0.7068	0.685	0.4884	0.6421	0.5939	0.5388	0.5975	0.5335	0.1636	0.6862	0.7247	0.5383	0.4662	0.6622	0.68	0.4438	0.5477	0.5833	0.5389	0.5445	0.3889	0.665	0.6894	0.5664	0.5701	0.4891	0.3779	0.5041
ERRFI1	531	AT	3.4			0	1	0.0488	0.0066	0.9909	0.9928	0.9885	0.9895	0.9901	0.9889	1	0.9976	0.9706	0.9877	0.9775	0.9883	0.9809	0.9958	0.9956	0.991	1	0.9911	0.9973	0.987	0.9915	0.9747	0.9865	0.9863	0.998	0.9918	0.9854	0.976	0.9947	0.9927	0.9959	0.9946	0.9941	0.9972	0.9982	0.9959	0.9936	0.9981	0.9985	0.9911
ERRFI1	532	AT	4			0	1	0.0488	0.0066	0.0091	0.0072	0.0115	0.0105	0.0099	0.0111	0	0.0024	0.0294	0.0123	0.0225	0.0117	0.0191	0.0042	0.0044	0.009	0	0.0089	0.0027	0.013	0.0085	0.0253	0.0135	0.0137	0.002	0.0082	0.0146	0.024	0.0053	0.0073	0.0041	0.0054	0.0059	0.0028	0.0018	0.0041	0.0064	0.0019	0.0015	0.0089
ERRFI1	533	RI	3.3	3.2	3.4	0	1	0.8891	0.179	0.2286	0.2022	0.2219	0.4167	0.3638	0.4666	0.6086	0.4899	0.295	0.3267	0.5904	0.3981	0.6696	0.5851	0.2537	0.3701	0.4648	0.4567	0.1912	0.2806	0.49	0.7849	0.395	0.5534	0.2928	0.604	0.4895	0.6491	0.5108	0.4513	0.3012	0.6443	0.5537	0.1378	0.3366	0.2901	0.3736	0.0726	0.3113	0.5424
ERRFI1	534	AA	3.1:3.2:3.3	2	3.4	0	0.9703	0.9536	0.2452	0.7376	0.363	0.4741	0.8015	0.8582	0.7358	0.4663	0.8056		0.7376	0.9441	0.7696	0.9728	0.9257	0.4149	0.5748	1	0.8854	0.317	0.6444	0.7932	1	0.9415	0.86	0.5887	1	0.8437	1	1	0.8099	1	0.9532	0.7416	0.2896	1	0.7466	0.5592	0.2139	0.8033	0.8572
ERRFI1	535	AA	3.2:3.3	2	3.4	0	1	0.7383	0.0935	0.9305	0.8046	0.8597	0.9762	0.9666	0.9575	0.8086	0.9786	0.6182	0.9502	0.9811	0.9679	0.9896	0.9787	0.8745	0.9317	1	0.9828	0.8431	0.9297	0.9562	1	0.9925	0.9632	0.8895	1	0.9728	1	1	0.9719	1	0.98	0.9539	0.8265	1	0.9557	0.9047	0.6275	0.977	0.9716
ERRFI1	536	ES	3.1:3.2	2	3.4	0	0.9459	0.7783	0.1051	0.922	0.7447	0.7768	0.8927	0.9391	0.8135	0.783	0.8645		0.8833	0.931	0.8588	0.9492	0.9226	0.7384	0.7271		0.9087	0.7108	0.85	0.8137		0.9642	0.8472	0.8104	1	0.8643		1	0.8657	1	0.9349	0.7524	0.7741	1	0.9038	0.7346	0.8291	0.9234	0.8657
ERRFI1	537	ES	3.2	2	3.4	0	1	0.2066	0.0225	0.9825	0.9544	0.9592	0.9882	0.9865	0.9722	0.946	0.9859	0.7934	0.9808	0.9763	0.9821	0.9802	0.9777	0.965	0.964	1	0.9865	0.9659	0.9763	0.9611	1	0.9955	0.9591	0.9598	1	0.9768	1	1	0.9811	1	0.9717	0.9561	0.9755	1	0.9856	0.9537	0.9676	0.992	0.9733
ERRFI1	538	AA	3.1	2	3.2	0	0.9948	0.4081	0.0604	0.1779	0.1262	0.1333	0.0934	0.1769	0.1152	0.1705	0.0874		0.134	0.2564	0.1034	0.2872	0.2234	0.0947	0.0932	0.0799	0.1236	0.082	0.1248	0.1555	0.2973	0.1131	0.1964	0.156	0.2345	0.1378	0.1746	0.116	0.114	0.1349	0.3063	0.1282	0.0817	0.1099	0.125	0.1236	0.1431	0.0922	0.1554
RERE	541	AP	9			0	0.9791	0.8336	0.1571	0.1853	0.1664	0.3089	0.1011	0.1924	0.3031	0.7899	0.1847		0.319	0.1703	0.1435	0.3347	0.2772	0.1444	0.1683	0.1275	0.0475	0.0482	0.1823	0.2533		0.2862	0.4996	0.3634	0.387	0.1551		0	0.2989	0.7458		0.4187	0.1225	0.3265	0.1179	0.1418	0.5392	0.2723	0.1035
RERE	543	AP	14			0	0.9791	0.8056	0.1448	0.5867	0.1248	0.4278	0.4853	0.4199	0.4547	0.0439	0.3694		0.2392	0.4087	0.1076	0.2703	0.1386	0.3789	0.3535	0.5737	0.2849	0.3215	0.3828	0.1382		0.4293	0.1729	0.4153	0.2419	0.3491		0.1901	0.0897	0		0	0.2296	0.1633	0.4599	0.3546	0.2157	0.4085	0.2793
RERE	544	AP	1			0	0.9791	1	0.1588	0.2281	0.7089	0.2633	0.4136	0.3877	0.2422	0.1662	0.446		0.4418	0.4209	0.7489	0.395	0.5841	0.4767	0.4782	0.2988	0.6677	0.6303	0.435	0.6085		0.2846	0.3275	0.2212	0.3711	0.4958		0.8099	0.6114	0.2542		0.5813	0.6479	0.5102	0.4221	0.5036	0.2451	0.3191	0.6172
RERE	545	ES	18:19:20:21:22:23:24	17	25	0	1	0.0107	0.0008	1	1	1	1	1	1	1	1	1	1	1	1	1	1	1	1	1	1	1	1	1	1	1	1	1	1	1	1	1	1	1	1	1	1	1	1	1	1	1	1
RERE	546	ES	5	4	6	1	0.7749	0.4545	0.0794		0.6704	0.8749	0.7469	0.8014	0.7015		0.6315		0.7527	0.9273	0.8275	0.9498	0.8819	0.8353	0.7327		0.9457	0.9139	0.8587	0.821		0.8704	0.7072	0.5003	0.7116	0.8749	0.7028	0.7422	0.5682				0.8321		0.9304	0.8413			0.7375
CA6	548	AT	3			0	0.9738	0.9916	0.2529	1	0.1346	0.8762	1	0.4472	1	0.7521	1	0.9066	1	1	1	1	0.6022	0.5742	0.7964	1	1	0.7964	1	1	0.1983	1	1	0.8402	1	0.899	0.135	1	1	0.6323	0.8351	0.3248	1	1	1	0.0582	1	0.7245	0.2057
CA6	549	AT	10			0	0.9738	0.9565	0.2335	0	0.8391	0.1238	0	0.5528	0	0.2479	0	0.0934	0	0	0	0	0.2919	0.4258	0.2036	0	0	0.2036	0	0	0.7245	0	0	0.1598	0	0.101	0.6229	0	0	0.3677	0.1649	0.6752	0	0	0	0.8804	0	0.2755	0.7943
CA6	550	AT	9			0	0.9738	0.6285	0.0692	0	0.0262	0	0	0	0	0	0	0	0	0	0	0	0.1059	0	0	0	0	0	0	0	0.0773	0	0	0	0	0	0.2421	0	0	0	0	0	0	0	0	0.0614	0	0	0
SLC2A5	556	RI	6.2	6.1	6.3	0	0.7766	1	0.166	0.1547	0.2585	0.0715	0.1197	0.1257	0.1615	0.0646	0.0854		0.169		0.2621	0.1947	0.0564	0.11	0.2312		0.0536	0.1929	0.0497	0.4555		0.32	0.1442	0.0754	0.1156	0.6026		0.32		0.088	1	0.2994	0.0395		0.0497	0.173	0.0255	0.0171	0.2525
SLC2A5	557	ES	02:03:00	1	5	0	0.8796	0.2939	0.023	1	1	1	1	1	1	1	1		1		1	1	1	1	1		1	1	1	1		0.7061	1	1	1				1	1	1	1	0.9914	1	1	1	1	1	1
GPR157	558	ES	3	2	4	0	0.9581	0.6718	0.1208	0.8065	0.7328	0.651	0.8057	1	0.9032	0.7794	0.6852		0.8773	1	0.7738	0.7294	0.8153	0.7683	0.8725	0.8369	0.8142	0.5963	0.8235	0.6054		0.8235	0.8017	0.9238	0.8326	1		0.6927	0.5327			0.4154	0.6867	0.8484	0.7133	0.8369	0.6852		0.6952
SPSB1	561	AP	3.1			0	0.9302	0.7468	0.0738	0	0	0	0	0	0	0	0		0.0628	0	0	0	0	0	0	0	0	0	0	0		0	0	0	0.1177		0	0	0	0		0	0	0	0.0368	0	0	0	0.0894
SPSB1	562	AP	1			0	0.9302	0.9727	0.1274	0.9475	0.95	0.9161	0.9822	1	1	1	0.9193		0.9372	0.95	0.95	0.7686	1	1	1	1	1	0.9785	1	1		0.8836	0.8836	1	0.7982		1	0.94	1	0.8836		0.8507	1	1	0.9237	1	1	1	0.8787
SPSB1	563	AP	2			0	0.9302	0.9046	0.0955	0.0525	0.05	0.0839	0.0178	0	0	0	0.0807		0	0.05	0.05	0.2314	0	0	0	0	0	0.0215	0	0		0.1164	0.1164	0	0.0841		0	0.06	0	0.1164		0.1493	0	0	0.0395	0	0	0	0.0319
TMEM201	564	AT	11			0	1	0.6964	0.119	0.5623	0.7189	0.4025	0.5263	0.6168	0.5752	0.7208	0.6564	0.5207	0.4825	0.462	0.6819	0.6658	0.6949	0.4426	0.5044	0.5874	0.602	0.6763	0.6992	0.7962	0.5138	0.466	0.372	0.5	0.6867	0.5559	0.4147	0.6489	0.735	0.7247	0.7931	0.6673	0.5725	0.4868	0.5452	0.5197	0.6012	0.6	0.5706
TMEM201	565	AT	6.2			0	1	0.6964	0.119	0.4377	0.2811	0.5975	0.4737	0.3832	0.4248	0.2792	0.3436	0.4793	0.5175	0.538	0.3181	0.3342	0.3051	0.5574	0.4956	0.4126	0.398	0.3237	0.3008	0.2038	0.4862	0.534	0.628	0.5	0.3133	0.4441	0.5853	0.3511	0.265	0.2753	0.2069	0.3327	0.4275	0.5132	0.4548	0.4803	0.3988	0.4	0.4294
TMEM201	566	ES	8	7	9	0	0.8621	0.2186	0.044	1	1	1	1	1	1	1	1		0.939	1	1	0.7938	1	1	1		0.9267	0.958	1	1		1		1		1		0.9429	1			1	1		0.9446	1	0.9346	1	1
PIK3CD	572	RI	17.2	17.1	17.3	0	0.8796	1	0.144	0.1633	0.1329	0.2018	0.2469		0.2521		0.2059		0.2965	0.2737	0.1791	0.1553	0.1039	0.0777	0.0902		0.0476	0.0996	0.2124		0.3359	0.2521	0.1443	0.163	0.2521	0.3748	0.1835	0.5742	0.3711				0.0472		0.1232	0.101	0	0.046	0.0532
PIK3CD	574	AA	8.1	7	8.2	0	0.9442	0.1799	0.0244	1	1	1	1	1	1	1	0.9394		1	1	1	1	1	0.9563	1	1	0.9692	0.98	1			0.9426	1	1	1	0.9563		1	1		1		1	1	1	1	0.9727	1	1
CLSTN1	575	ES	11	10	12	0	0.9983	0.9011	0.1633	0.2339	0.0718	0.4117	0.2321	0.639	0.2384	0.038	0.2556	0.686	0.1507	0.1453	0.0639	0.2136	0.209	0.1558	0.2692	0.0831	0.1821	0.3082	0.1185	0.0429	0.5811	0.231	0.1553	0.069	0.3173	0.117	0.2207	0.0956	0.1504	0.1772	0.163	0.0467	0.236	0.0787	0.1852	0.0894	0.9062	0.1883	0.1802
CLSTN1	576	ES	3	2	4	0	0.9773	0.7799	0.1224	0.1641	0.0445	0.2014	0.1277	0.3613	0.1675	0	0.1317		0.0564	0.0904	0.0235	0.1044	0.1571	0.1348	0.3008	0.0474	0.1598	0.1343	0.0497	0.015		0.2439	0.1756	0.0585	0.1899	0.1337	0.2716	0.0506	0.0489				0.1623	0	0.1951	0.0651	0.2779	0	0.1795
CTNNBIP1	577	AP	1			0	0.9948	1	0.1948	0.7513	0.7767	0.5424	0.6159	1	0.6766	0.84	0.7406	0.55	0.4167	0.7489	0.7746	0.7778	0.3007	0.4273	0.7645	0.6109	0.5305	0.8743	0.3634	0.1971		0.3667	0.8842	0.3921	0.5402	0.614	0.5277	0.5381	0.6823	0.8774	0.682	0.942	0.5495	0.4549	0.7237	0.8717	0.302	0.7358	1
CTNNBIP1	578	AP	2			0	0.9948	1	0.1758	0.0926	0	0.1473	0.1613	0	0.1289	0.16	0.194	0.1601	0.3613	0.2511	0.2254	0.2222	0.6153	0.2686	0.2355	0.0582	0.1692	0.1257	0.0952	0.2065		0.3602	0.1158	0.6079	0.4598	0.386	0.1229	0.1579	0.3177	0.1226	0.1191	0.058	0.1919	0.1853	0.21	0	0.698	0.0984	0
CTNNBIP1	579	AP	6.1			0	0.9948	0.5684	0.0993	0	0.1402	0.2394	0.1019	0	0.1222	0	0	0.1821	0.1712	0	0	0	0.084	0.191	0	0.3309	0.1374	0	0.5414	0		0.2731	0	0	0	0	0.3494	0	0	0	0	0	0	0.2259	0.0663	0	0	0	0
CTNNBIP1	580	AP	4			0	0.9948	0.6562	0.1276	0.1561	0.0831	0.0709	0.1208	0	0.0724	0	0.0654	0.1079	0.0507	0	0	0	0	0.1132	0	0	0.1629	0	0	0.5965		0	0	0	0	0	0	0.304	0	0	0.1989	0	0.2587	0.1339	0	0.1283	0	0.1658	0
CTNNBIP1	583	RI	8.2	8.1	8.3	0	0.9983	0.2267	0.0351	1	0.9803	0.9366	0.9633	0.9519	0.9091	0.9899	0.9848	0.9704	0.9091	0.9184	0.926	0.9541	0.9568	0.9534	0.9749	1	0.9306	0.9247	0.9663	0.8824	0.8599	1	0.9037	0.9562	0.9503	1	1	1	0.9655	0.9595	0.93	0.9714	0.9906	0.9491	0.9602	0.8722	0.9199	0.9348	1
CTNNBIP1	584	ES	3	1	5	0	0.9668	0.6225	0.0961	0.2172	0.229	0.1644	0.1261	0.1159	0.1938	0.1558	0.1173	0.2399	0.1408	0.3628	0.2311	0.0459	0.1998	0.1669	0.2651	0.2129	0.2651	0.1861	0.2129			0	0.1073	0.18	0.1938	0.0673		0.3247	0.419	0.248	0.1948	0.3344	0.1938	0.2048	0.1191	0.1938	0.1938	0.2322	0.1709
LZIC	586	AP	1			0	0.993	0.7311	0.1258	0.3062	0.3439	0.5234	0.4573	0.5189	0.3966	0.4145	0.3532	0.3422	0.3206	0.354	0.3062	0.4145	0.3314	0.2954	0.4663	0.5482	0.411	0.2275	0.3831	0.4399	0.4472	0.4145	0.4383	0.3242	0.3886	0.2124	0.6295	0.3373	0.2188	0.3382	0.2716	0.4418	0.27	0.3382	0.4652	0.5059	0.325	0.4893	0.4688
LZIC	587	AP	2			0	0.993	0.7311	0.1258	0.6938	0.6561	0.4766	0.5427	0.4811	0.6034	0.5855	0.6468	0.6578	0.6794	0.646	0.6938	0.5855	0.6686	0.7046	0.5337	0.4518	0.589	0.7725	0.6169	0.5601	0.5528	0.5855	0.5617	0.6758	0.6114	0.7876	0.3705	0.6627	0.7812	0.6618	0.7284	0.5582	0.73	0.6618	0.5348	0.4941	0.675	0.5107	0.5312
LZIC	588	AD	3.2	3.1	4	0	0.9983	0.0898	0.0067	1	1	0.9845	1	1	1	1	1	1	0.9845	1	0.9915	1	0.9932	1	1	1	1	1	1	1	1	1	1	1	1	1	1	1	1	1	1	0.9882	1	1	1	1	1	1	1
NMNAT1	589	AT	5			0	1	0.3952	0.075	0.3947	0.4585	0.4291	0.4531	0.336	0.4355	0.4274	0.4863	0.3196	0.519	0.599	0.4921	0.4713	0.4553	0.3452	0.4942	0.3504	0.3816	0.4844	0.3897	0.429	0.5216	0.3672	0.559	0.4163	0.4408	0.4201	0.4815	0.3937	0.4332	0.33	0.4494	0.472	0.3252	0.2337	0.4748	0.4758	0.3195	0.2996	0.5335
NMNAT1	590	AT	6.3			0	1	0.3952	0.075	0.6053	0.5415	0.5709	0.5469	0.664	0.5645	0.5726	0.5137	0.6804	0.481	0.401	0.5079	0.5287	0.5447	0.6548	0.5058	0.6496	0.6184	0.5156	0.6103	0.571	0.4784	0.6328	0.441	0.5837	0.5591	0.5799	0.5185	0.6063	0.5668	0.67	0.5506	0.528	0.6748	0.7663	0.5252	0.5242	0.6805	0.7004	0.4665
NMNAT1	591	RI	6.2	6.1	6.3	0	1	0.4579	0.0746	0.7134	0.6201	0.6517	0.6891	0.6701	0.699	0.6799	0.6715	0.6633	0.64	0.622	0.609	0.6042	0.6456	0.6558	0.7067	0.7264	0.6608	0.7588	0.6339	0.6021	0.6697	0.6351	0.5744	0.6095	0.6568	0.6375	0.505	0.6454	0.5611	0.7029	0.5691	0.6449	0.7407	0.8582	0.6829	0.5443	0.8269	0.696	0.5506
RBP7	592	ES	2	1	3	0	0.9825	0.9658	0.2064	0.4656	0.777	0.4039	0.4388	0.6039	0.2915	0.615	0.176	0.2859	0.5475	0.9104	0.6805	0.7176	0.7233	0.359	0.6106	0.4656	0.7531	0.6901	0.8316	0.1984	0.2042	0.6039	0.777	1	0.5779	0.4136	0.7616	0.4082	0.7439	0.3674	0.6115	0.399	0.4656		0.4346	0.4758	0.1729	0.3173	0.6193
UBE4B	593	AT	3			0	1	0.4162	0.0528	0.0242	0.0451	0.0308	0.0521	0.0368	0.024	0.0604	0.0094	0.0198	0.0254	0.06	0.1462	0.0285	0.0495	0.0272	0.0189	0.0405	0.1127	0.0421	0.0308	0.2421	0.0624	0.0768	0.0626	0.0313	0.0931	0.0239	0.0627	0.0415	0.0151	0.1076	0.0822	0.0559	0.0962	0.0462	0.0463	0.0441	0.0214	0.0332	0.0526
UBE4B	594	AT	29			0	1	0.4162	0.0528	0.9758	0.9549	0.9692	0.9479	0.9632	0.976	0.9396	0.9906	0.9802	0.9746	0.94	0.8538	0.9715	0.9505	0.9728	0.9811	0.9595	0.8873	0.9579	0.9692	0.7579	0.9376	0.9232	0.9374	0.9687	0.9069	0.9761	0.9373	0.9585	0.9849	0.8924	0.9178	0.9441	0.9038	0.9538	0.9537	0.9559	0.9786	0.9668	0.9474
UBE4B	595	AD	27.2	27.1	28	0	0.9965	0.1117	0.0061	0	0	0	0	0	0	0	0	0	0	0	0	0	0	0	0	0	0	0	0	0	0	0.0272	0	0	0	0	0.0316	0	0	0	0	0	0	0	0	0	0	0	0
UBE4B	596	ES	8	7	9	0	0.9354	0.8054	0.0858	0.0489	0.2988	0.1276	0.1981	0.0811	0.1169	0.2796	0.0885		0.3194	0.1355	0.2641	0.1636	0.0978	0.2395	0.1276		0.1379	0.1182	0.146	0.1099		0.3018	0.0422	0.0672	0.065	0.0848	0.3018	0.1355	0.4547				0.0414	0.0166	0.2009	0.0326	0.0642		0.1756
KIF1B	601	AT	25			0	1	0.683	0.1123	0.2572	0.093	0.2974	0.2869	0.3353	0.2308	0.2986	0.2147	0.3236	0.2916	0.2727	0.1955	0.4691	0.2163	0.3702	0.2405	0.1229	0.3323	0.2686	0.1391	0.4844	0.1394	0.4942	0.1747	0.226	0.3067	0.2435	0.1989	0.2599	0.3496	0.3656	0.2071	0.2459	0.3598	0.3321	0.3292	0.1329	0.6226	0.2241	0.2689
KIF1B	602	AT	52.2			0	1	0.683	0.1123	0.7428	0.907	0.7026	0.7131	0.6647	0.7692	0.7014	0.7853	0.6764	0.7084	0.7273	0.8045	0.5309	0.7837	0.6298	0.7595	0.8771	0.6677	0.7314	0.8609	0.5156	0.8606	0.5058	0.8253	0.774	0.6933	0.7565	0.8011	0.7401	0.6504	0.6344	0.7929	0.7541	0.6402	0.6679	0.6708	0.8671	0.3774	0.7759	0.7311
KIF1B	604	AA	52.1	51	52.2	0	1	0.0367	0.0037	1	1	1	1	1	0.9653	1	1	1	1	1	1	1	0.9825	1	1	1	1	1	1	1	1	1	1	1	1	0.9633	1	1	1	1	1	1	1	1	1	1	1	1	1
KIF1B	606	ES	00:16:17.100000	15	17.2	0	0.7574	1	0.0918	0.037	0.078	0.0341	0.1179	0.1126					0.0406	0.1613	0.1583	0.1499	0.0825	0.22	0.057			0.1783	0.037	0.0831		0.3607	0.1535	0.1841	0.1947	0.0449							0.0877		0.0534	0.4877	0.0258		0.1126
PGD	610	ES	4	3.2	5	0	1	0.0638	0.0074	0.9834	0.9789	0.9921	0.9972	0.9884	0.9948	0.9924	0.9822	0.9928	1	0.9913	0.9945	0.9951	0.9926	0.9841	0.9835	1	0.9929	0.9925	0.9945	0.9888	1	0.9972	0.9929	0.9918	0.9803	0.9967	1	0.9942	1	0.974	0.9882	0.9817	0.9889	1	0.9885	0.9966	0.9787	0.9819	0.9885
PGD	611	AA	3.1	2	3.2	0	0.9965	0.0606	0.0087	0.006	0.0187	0.0102	0.0051	0.0031	0	0	0	0.0159	0.0055	0.0133	0.0041	0.0221	0.002	0.0058	0.0117	0	0.0054	0.0072	0.005	0.0151	0	0	0	0.0019	0	0	0.0128	0.0115	0	0	0.0196	0.0132	0.0036	0	0	0.0046	0	0	0.0224
PGD	612	AD	1.2	1.1	2	0	0.993	0.0442	0.0027	0	0.0019	0	0	0.0011	0	0	0	0	0.0015	0	0	0	0.001	0	0.0012	0	0.0005	0.0013	0	0.0004	0	0	0.0013	0	0	0	0.0013	0.0012	0	0	0	0.0011	0	0	0	0	0	0.003	0
APITD1	613	AT	6			0	1	0.246	0.0309	0.1038	0.1549	0.0666	0.0727	0.0542	0.0493	0.2433	0.1	0.0699	0.0804	0.0208	0.053	0.1105	0.0511	0.0566	0.131	0.093	0.054	0.0512	0.1235	0.0511	0.0634	0.0766	0.0456	0.0592	0.0566	0.0491	0.0432	0.1229	0.0706	0.0448	0.0341	0.0456	0.0876	0.0621	0.0414	0.0533	0.0961	0.0558	0.0521
APITD1	614	AT	5			0	1	0.246	0.0309	0.8962	0.8451	0.9334	0.9273	0.9459	0.9507	0.7567	0.9	0.9301	0.9196	0.9792	0.947	0.8895	0.9489	0.9434	0.869	0.907	0.946	0.9488	0.8765	0.9489	0.9366	0.9234	0.9544	0.9408	0.9434	0.9509	0.9568	0.8771	0.9294	0.9552	0.9659	0.9544	0.9124	0.9379	0.9586	0.9467	0.9039	0.9442	0.9479
DFFA	616	AT	5.3			0	1	0.5	0.0788	0.3209	0.3691	0.324	0.305	0.3646	0.2155	0.0746	0.3639	0.5041	0.3229	0.2292	0.245	0.1776	0.3291	0.2797	0.2676	0.2948	0.2952	0.2633	0.3316	0.2264	0.5026	0.3426	0.4219	0.2345	0.2965	0.2711	0.3681	0.2851	0.3386	0.4548	0.3794	0.3829	0.2053	0.2435	0.372	0.3051	0.214	0.1833	0.1858
DFFA	617	AT	6			0	1	0.5	0.0788	0.6791	0.6309	0.676	0.695	0.6354	0.7845	0.9254	0.6361	0.4959	0.6771	0.7708	0.755	0.8224	0.6708	0.7203	0.7324	0.7052	0.7048	0.7367	0.6684	0.7735	0.4974	0.6574	0.5781	0.7655	0.7035	0.7289	0.6319	0.7149	0.6614	0.5452	0.6206	0.6171	0.7947	0.7565	0.628	0.6949	0.786	0.8167	0.8142
DFFA	618	AD	5.2	5.1	6	0	0.9686	0.1644	0.0346	0	0.0715	0.0459	0	0	0	0	0	0	0.1278		0	0	0	0.0663	0	0	0	0	0.1163	0	0	0	0	0	0	0	0	0.1046	0	0	0	0	0.071	0	0.0727	0.0489	0	0.0483	0
DFFA	619	ES	4	3	5.1	0	1	0.0934	0.0137	1	0.9821	0.9898	0.9903	0.99	0.9751	1	1	0.9743	0.9562	1	1	0.9678	0.9937	0.9919	0.9887	0.9565	0.9852	0.9827	0.9856	1	1	0.9642	0.9918	1	0.9915	0.9762	1	0.9756	1	0.9942	0.9792	0.9585	0.9885	0.9863	0.9639	0.9922	1	0.9786	0.9871
PEX14	620	ES	3	2	4	0	0.9983	0.0804	0.0073	1	1	1	0.9823	1	0.9801	1	1	1	1	1	0.9807	1	1	1	0.9873	1	1	1	1	0.9759	1	1	1	1	1	1	1	1	1	1	1	1	1	1	0.9908	1	1	1	1
CASZ1	621	AT	16.2			0	1	0.9065	0.1391	0.4157	0.4303	0.3549	0.4991	0.3248	0.4399	0.2958	0.7064	0.5082	0.6695	0.3211	0.4377	0.2185	0.2413	0.3805	0.4667	0.4197	0.4738	0.4282	0.5706	0.3135	0.6454	0.3411	0.4306	0.3414	0.3614	0.3481	0.3537	0.5327	0.3379	0.6357	0.6149	0.2754	0.3668	0.4309	0.4635	0.4071	0.9065	0.6004	0.5272
CASZ1	622	AT	21			0	1	0.9065	0.1391	0.5843	0.5697	0.6451	0.5009	0.6752	0.5602	0.7042	0.2936	0.4918	0.3305	0.6789	0.5623	0.7815	0.7587	0.6195	0.5333	0.5803	0.5262	0.5718	0.4294	0.6865	0.3546	0.6589	0.5694	0.6586	0.6386	0.6519	0.6463	0.4673	0.6621	0.3643	0.3851	0.7246	0.6332	0.5691	0.5365	0.5929	0.0935	0.3996	0.4728
TARDBP	629	RI	7.5	7.4	7.6	0	1	0.0683	0.0073	0.9938	0.9983	0.9869	0.9915	0.9984	0.9914	1	0.9976	0.9989	0.9967	1	0.9896	0.9812	0.9856	0.9906	0.998	0.9668	0.998	0.9945	0.9972	0.9766	0.9885	0.9961	0.9939	0.9959	0.9911	0.9948	1	0.9974	0.9733	0.9965	0.9948	0.9796	0.9985	0.9909	0.9989	1	0.9971	0.9787	0.9885
TARDBP	630	RI	7.3	7.2	7.4	0	1	0.0267	0.0042	0.9955	1	1	0.9943	0.9928	0.9847	0.9937	0.9955	1	0.9978	1	0.996	0.9892	0.9939	0.995	1	1	1	0.9981	0.9951	0.9878	0.9848	1	1	1	1	0.9914	0.9936	0.9928	1	0.9904	1	0.9929	0.9982	0.994	0.998	1	1	0.9865	1
TARDBP	631	RI	7.2:7.3	7.1	7.4	0	1	0.0309	0.0041	0.9955	1	1	0.9943	1	1	1	1	1	0.9978	1	0.998	0.9973	0.998	0.9975	0.9971	0.9763	1	1	1	0.9959	0.9923	1	1	0.9976	0.9938	0.983	0.9873	0.9952	1	0.9904	1	0.993	0.9982	1	0.9961	1	0.9956	0.982	1
TARDBP	633	ES	03:04:00	2	5	0	1	0.3412	0.0433	0.9357	0.946	0.9454	1	1	0.9632	0.9636	0.9596	0.9216	1	0.9536	1	1	0.9678	0.9407	0.9082	1	1	1	0.9511	0.98	1	1	1	0.9424	0.9767	1	1	1	1	1	1	0.8852	1	0.917	0.9719	0.946	1	0.9628	0.9793
TARDBP	634	ES	4	2	5	0	1	0.1966	0.0102	0.9868	0.9926	0.9883	1	1	0.9929	0.9931	0.9915	0.8034	1	0.9821	1	1	0.9941	0.9906	0.9881	1	1	1	0.992	0.9971	1	1	1	0.9896	0.9944	1	1	1	1	1	1	0.9698	1	0.9935	0.9958	0.9966	1	0.988	0.9955
TARDBP	635	ES	3	2	4	0	1	0.739	0.0949	0.2045	0.1459	0.2105	0.1796	0.0582	0.185	0.2157	0.2029	0.7706	0.1768	0.3223	0.1939	0.272	0.1911	0.1633	0.1333	0.1748	0.1586	0.164	0.168	0.1583	0.4521	0.2458	0.2283	0.1837	0.2254	0.1624	0.1935	0.1952	0.1509	0.3363	0.3533	0.2498	0.0858	0.0878	0.1581	0.0748	0.0492	0.3011	0.2147
MASP2	636	AT	12			0	0.9668	0.7358	0.0635	1	1	1	1	1	1	1	1		1	1	1	1	1	1	1	1	1	1	1	1	1	1	1	1	1	1	1	1	1		1	1	1	1	1	1	1	1	1
MASP2	637	AT	5			0	0.9668	0.7358	0.0635	0	0	0	0	0	0	0	0		0	0	0	0	0	0	0	0	0	0	0	0	0	0	0	0	0	0	0	0	0		0	0	0	0	0	0	0	0	0
SRM	640	AA	2.1	1	2.2	0	0.9948	0.2115	0.0324	0.0109	0.073	0.1103	0.0791	0.0393	0.0984	0.0436	0.0978	0.0363	0.1096	0.123	0.057	0.0878	0.0927	0.047	0.095	0.1309	0.1032	0.0597	0.1227	0.0712	0.0736	0.0616	0.048	0.0865	0.0936	0.0629	0.162	0.071	0.047	0.0529	0.0997	0.0826	0.0319	0.015	0.0731	0.0845	0.0728	0.049	0.0936
EXOSC10	643	ES	18	17	19	0	1	0.0297	0.0056	1	1	1	0.9952	1	1	1	0.9926	0.9944	0.9955	1	1	1	1	1	1	1	1	0.9869	0.9946	0.997	1	0.9954	1	1	1	1	1	0.9968	1	1	1	0.993	0.9909	1	0.9975	1	1	0.9964	0.9943
EXOSC10	644	RI	16.4	16.3	16.5	0	1	0.8736	0.096	0.1867	0.1568	0.1486	0.2493	0.078	0.287	0.1277	0.1787	0.1914	0.2084	0.2759	0.2519	0.2895	0.2523	0.1093	0.1211	0.1692	0.142	0.1118	0.2101	0.1951	0.2728	0.2071	0.175	0.1591	0.2711	0.2187	0.3503	0.2495	0.2122	0.1069	0.1805	0.1819	0.0354	0.052	0.1152	0.0919	0.0274	0.0651	0.3013
EXOSC10	645	RI	16.2	16.1	16.3	0	1	1	0.0901	0.1547	0.0909	0.1491	0.1368	0.0555	0.1932	0.0164	0.0931	0.1932	0.1501	0.2122	0.2882	0.2643	0.2524	0.0804	0.1493	0.1204	0.061	0.0873	0.1858	0.1266	0.2033	0.1431	0.2027	0.222	0.2205	0.1922	0.3081	0.1773	0.1656	0.0948	0.1229	0.2244	0.0384	0.0765	0.1119	0.0499	0.0247	0.0323	0.2369
EXOSC10	647	ES	4	3	5	0	1	0.8065	0.1246	0.6087	0.4393	0.4444	0.5814	0.48	0.6651	0.9158	0.5918	0.9667	0.4919	0.7093	0.4942	0.6154	0.4611	0.5105	0.3946	0.4355	0.4743	0.3643	0.5645	0.3432	0.7953	0.5745	0.6172	0.5468	0.5695	0.6455	0.7458	0.5866	0.4664	0.6341	0.6813	0.4478	0.3294	0.4041	0.6804	0.3697	0.3087	0.7157	0.4557
MTOR	648	AP	1			0	0.822	1	0.1992	0.9181	0.8413	0.9278	0.8906		0.7806	0.5624	0.9536		0.8015	0.8371	0.5892	0.5241	0.8976	0.7336	0.973	0.9278	0.8671	0.8986	0.8259	0.8852			0.7116	0.8526	0.8852	0.794	0	0.5911	0.4121	0.6584			0.9629		0.8079	0.9455			0.7511
MTOR	649	AP	39.1			0	0.822	1	0.1992	0.0819	0.1587	0.0722	0.1094		0.2194	0.4376	0.0464		0.1985	0.1629	0.4108	0.4759	0.1024	0.2664	0.027	0.0722	0.1329	0.1014	0.1741	0.1148			0.2884	0.1474	0.1148	0.206	1	0.4089	0.5879	0.3416			0.0371		0.1921	0.0545			0.2489
UBIAD1	650	AT	3			0	1	0.2816	0.0327	0.047	0.1104	0.022	0.0562	0.0189	0.045	0.0041	0.0795	0	0.0613	0.0223	0.032	0.052	0.1126	0.0454	0.0503	0	0.0445	0.1152	0.0124	0.0834	0	0.0308	0.0404	0.0558	0.0164	0.0238	0.0575	0.0339	0.049	0.0448	0	0.0253	0.1008	0.0351	0.0442	0.0164	0.0489	0.0153	0.053
UBIAD1	651	AT	2			0	1	0.2816	0.0327	0.953	0.8896	0.978	0.9438	0.9811	0.955	0.9959	0.9205	1	0.9387	0.9777	0.968	0.948	0.8874	0.9546	0.9497	1	0.9555	0.8848	0.9876	0.9166	1	0.9692	0.9596	0.9442	0.9836	0.9762	0.9425	0.9661	0.951	0.9552	1	0.9747	0.8992	0.9649	0.9558	0.9836	0.9511	0.9847	0.947
FBXO44	654	AP	1			0	0.9564	0.4555	0.0691	0.1409	0.0978	0.1672	0.1169	0.2455	0.0483	0.1568	0.2639	0.2567	0.0663	0.1375	0.1568	0.1345	0.0383	0.1568	0.147	0.1705	0.1258	0.1461	0.0616	0.3026	0.1909	0.299	0.1375	0.1645	0.1782	0.132		0.1284	0.1224	0.173	0.1378		0.1693	0.1484	0.1347	0.1224	0.2181	0.0947	0
FBXO44	655	AP	2			0	0.9564	0.4555	0.0691	0.8591	0.9022	0.8328	0.8831	0.7545	0.9517	0.8432	0.7361	0.7433	0.9337	0.8625	0.8432	0.8655	0.9617	0.8432	0.8529	0.8295	0.8742	0.8539	0.9384	0.6974	0.8091	0.701	0.8625	0.8355	0.8218	0.868		0.8716	0.8776	0.827	0.8622		0.8307	0.8516	0.8653	0.8776	0.7819	0.9053	1
FBXO44	656	AD	5.2	5.1	6	0	0.9093	0.3993	0.0684	0.921	1	0.8826	0.8826	1	0.8713	1	1	1	0.8522	0.8826	0.8404	0.9357	0.9707	0.9405	0.9377	0.9233	0.8404	0.9186	0.8647	0.9613	0.9003	0.921	1	0.8713	0.9324	0.9624		0.9576	0.8826	0.9475		1	1	1	0.9736	0.9346		0.9405	0.7247
FBXO44	657	ES	5.2:6	5.1	7	0	0.9913	0.7504	0.1131	0.6967	0.558	0.8157	0.79	0.6786	0.7658	0.2924	0.8378	0.4181	0.5613	0.9482	0.9045	0.7944	0.9588	0.7495	0.6089	0.7905	0.7622	0.6881	0.6357	0.8643	0.8505	0.7882	0.8829	0.5792	0.7238	0.7445		0.7604	0.711	0.843	0.6906	0.8768	0.4495	0.7235	0.7598	0.5516	0.598	0.6171	0.6659
FBXO44	658	ES	6	5.1	7	0	0.8115	0.818	0.1682	0.1742	0	0.3813	0.3534	0	0.3415	0		0	0.1938	0.731	0.6602	0.2225		0.1683	0.0999	0.2573	0.3908	0.1733	0.2256	0.2197	0.4139	0.2561		0.1776	0.1633	0.1117		0.1321	0.2663	0.243			0	0	0.0845	0.0857		0.1015	0.4449
FBXO44	659	AA	3.1	2	3.2	0	0.8953	0.5945	0.0999	0.8638	1	1	0.9163	1	1	1	1	1	0.871	1	0.7413	1	0.8308	1	1	0.898	1	1	1	1	1	1	1	1	1	1		0.7733	1		1		0.6824	1	1	1		1	1
FBXO44	660	ES	3.1:3.2	2	4	0	0.9651	0.9654	0.1527	0.243	0.1521	0.1727	0.5267	0.6966	0.2962	0.1606	0.1808	0.223	0.3222	0.5344	0.621	0.4268	0.2565	0.2843	0.1761	0.493	0.2137	0.3608	0.2484	0.6289	0.4335	0.6164	0.3773	0.2371	0.1367	0.3692		0.2628	0.2032	0.1221	0.3186	0.2804	0.1378	0.2384	0.246	0.1606		0.3322	0.4209
FBXO44	661	ES	3.2	2	4	0	0.7679	0.2287	0.0449	0.0418	0	0	0.0908		0	0	0	0	0.0606	0		0	0.0649	0	0	0.0938	0	0	0		0			0	0	0		0.0922		0			0.0611	0	0	0		0
MAD2L2	664	AD	7.2	7.1	8	0	0.9948	0.2099	0.025	0.0666	0.0377	0.0442	0.1035	0.0091	0.0456	0.0274	0.1093	0.0292	0.0637	0.0821	0.0486	0.0324	0.0769	0.0287	0.0408	0.0648	0.0405	0.0188	0.0383	0.0352	0.0498	0.0155	0.0529	0.031	0.0876	0.0737	0	0.0627	0.026	0.0246	0.0391	0.0287	0.0823	0.0494	0.0969	0.0895	0.0843	0.0537	0.0625
MAD2L2	665	ES	02:03:00	1	4	0	0.9878	0.9111	0.1814	0.9108	0.7801	0.6491	0.7208	0.5259	0.7518	0.5859	0.5568	1	0.9606	0.8463	0.8722	1	0.6827	0.8888	0.5318	1	0.7172	0.7331	0.7707	0.8674	0.3796	0.8907	1	0.892	0.9018	1	1	0.6488	0.756	1	1	0.0889	0.9495	1	1	0.4612	1	0.5986	1
AGTRAP	666	AD	6.2	6.1	7	0	0.9948	0.2895	0.0384	0.859	0.7997	0.8157	0.8611	0.8827	0.8509	0.8192	0.8424	0.8423	0.7685	0.9054	0.8407	0.7936	0.8686	0.8302	0.8361	0.8588	0.8517	0.9001	0.8469	0.8382	0.8228	0.8071	0.8084	0.8206	0.8497	0.824	0.7386	0.8675	0.8346	0.7964	0.8664	0.863	0.8515	0.8857	0.8382	0.8735	0.8289	0.8254	0.7365
AGTRAP	667	ES	4.1:4.2:5	3	6.1	0	0.9913	0.3792	0.0362	1	1	1	0.9614	1	1	1	1	1	1	1	1	0.9433	1	1	1	1	0.9765	1	1	1	1	1	1	1	1	1	1	0.916	1	0.8955	1	1	0.9271	1	1	1		1	1
AGTRAP	668	ES	4.2:5	3	6.1	0	0.9686	0.2858	0.0277	1	1	1	0.9679	1	1	1	1	1	1	1	1	0.7142	1	1	1	1	0.9861	1	1	1	1	1	1	1	1	1	1	0.8834	1	0.9683	1	1	0.8707	1	1	1	1	1	1
AGTRAP	669	ES	5	3	6.1	0	0.9983	0.0135	0.0017	1	1	1	0.9946	1	1	1	1	1	1	1	1	0.9935	1	1	1	1	0.9985	1	1	1	1	1	1	1	1	1	1	0.9921	1	0.9965	1	1	0.9983	1	1	1	1	1	1
AGTRAP	670	AA	4.1	3	4.2	0	0.9546	0.9437	0.1698	0.5044	0.5925	0.4628	0.5377	0.4603	0.7865		0.4367	0.359	0.7865	0.4922	0.4367	0.8951	0.7307	0.3175	0.3142	0.5925	0.4557	0.4565	0.4698	0.6646	0.3447	0.5602	0.5757	0.4955	0.7989	0.3955		0.6726	0.4042	0.3011	0.7587	0.1908	0.7106	0.4749	0.3351	0.3408		0.3128	0.4155
AGTRAP	671	ES	4.1:4.2	3	5	0	1	0.6922	0.0697	0.112	0.2017	0.1171	0.1744	0.0944	0.1059	0.016	0.0696	0.1098	0.1252	0.1316	0.148	0.1574	0.1316	0.1391	0.0438	0.1419	0.0883	0.1886	0.1182	0.1249	0.1095	0.1267	0.0932	0.1361	0.1706	0.1545	0.1068	0.1245	0.066	0.0459	0.1213	0.0409	0.0334	0.0434	0.07	0.067	0.0152	0.1153	0.2042
AGTRAP	672	ES	4.2	3	5	0	0.9913	0.4789	0.0703	0.132	0.1719	0.16	0.1749	0.1272	0.0375	0.0755	0.0966	0.1929	0.0386	0.1529	0.1876	0.0218	0.0563	0.2798	0.1003	0.1156	0.1211	0.2568	0.1483	0.0718	0.1789	0.1038	0.0758	0.1546	0.0548	0.2589	0.1461	0.0743	0.1101	0.1238	0.0535	0.1573	0.015	0.0585	0.1598	0.1285	0.0394	0.2515	0.2658
AGTRAP	675	ES	3:4.1:4.2	1	5	0	0.8761	0.6576	0.1267	1	0.7448	1	0.9295	0.9528	1		0.8908	0.6957	0.9293	1	1	0.6751	0.9467	1	1	1	0.9203	0.96	0.7586	0.8906	1	1	0.9126	1	1	1		0.8453		0.7314	1		0.642		0.8477	1		1
AGTRAP	677	ES	00:03:04.200000	1	5	0	0.9372	0.4131	0.067	1	0.9105	1	0.9539	0.9733	1	1	0.9486	0.9362	0.8605	1	1		0.9286	1	1	1	0.9611	0.981	0.8687	0.874	1	1	0.9164	1	1	1		0.9145	1	0.9028		1	0.7267	1	0.9781	1	1	1	1
AGTRAP	679	ES	3	1	5	0	0.9965	0.0694	0.0074	1	0.9844	1	0.9912	0.9967	1	1	0.9951	0.9863	0.9937	1	1	0.9762	0.9958	1	1	1	0.9956	0.9949	0.979	0.9896	1	1	0.9928	1	1	1	1	0.9932	1	0.9889	1	1	0.9946	1	0.9967	1	1	1	1
AGTRAP	680	ES	2	1	3	0	0.993	0.1755	0.0143	0.0193	0.039	0.005	0.0067	0.012	0.0053	0.0034	0.0077	0	0.0365	0	0	0.028	0.0126	0	0.0043	0.0091	0.0017	0.0301	0.0157	0.0398	0	0	0.0159	0.0067	0	0	0	0.0026	0.0393	0	0.024	0.023	0.0133	0	0.005	0.0108	0.0146	0	0
MTHFR	682	AP	4.1			0	0.815	1	0.1663	0.6172	0.7016	0.636	0.8362	0.3243	0.6913		0.4019		0.6684	0.8431	0.6019	0.7674	0.7207		0.7605	0.5353	0.6859	0.678	0.3792	0.7288	0.8704	1	0.8012	0.6124	0.3739	0.6684		0.9459	1				0.7406	0.9236	0.8012	0.7075			0.6684
MTHFR	683	AP	1			0	0.815	1	0.1654	0.3828	0.2984	0.3641	0.1638	0.6757	0.3087		0.5981		0.3316	0.1569	0.3981	0.2326	0.2793		0.2395	0.4647	0.3141	0.322	0.6208	0.2712	0.1296	0	0.1988	0.3038	0.6261	0.3316		0.0541	0				0.2594	0.0764	0.1988	0.2925			0.3316
MTHFR	684	AP	2			0	0.815	0.2476	0.0196	0	0	0	0	0	0		0		0	0	0	0	0		0	0	0	0	0	0	0	0	0	0.0837	0	0		0	0				0	0	0	0			0
CLCN6	686	AT	24			0	1	0.6565	0.0776	0.6958	0.6725	0.7157	0.7211	0.7916	0.7122	0.5785	0.682	0.7107	0.6188	0.557	0.6869	0.6658	0.669	0.7238	0.6592	0.7604	0.6064	0.746	0.763	0.7144	0.7785	0.687	0.7064	0.706	0.6868	0.673	0.6961	0.6629	0.6378	0.612	0.5622	0.6631	0.7721	0.6891	0.6989	0.7328	0.8815	0.7125	0.6803
CLCN6	687	AT	23.2			0	1	0.0919	0.0143	0.0475	0.0081	0.0147	0.009	0.0282	0.0197	0.0157	0.013	0	0	0.0244	0.0191	0.0323	0.0329	0.0037	0.0293	0	0.0261	0.0369	0.0162	0.0284	0.0039	0	0.0267	0.0164	0.0147	0.0283	0.0184	0.0611	0.0171	0.0101	0	0.0089	0.0035	0	0.0221	0.0167	0.003	0	0.0236
CLCN6	688	AT	6			0	1	0.6022	0.0741	0.2567	0.3194	0.2696	0.2699	0.1802	0.2681	0.4058	0.305	0.2893	0.3812	0.4186	0.294	0.3019	0.2981	0.2725	0.3114	0.2396	0.3675	0.217	0.2208	0.2572	0.2176	0.313	0.2669	0.2776	0.2985	0.2987	0.2855	0.276	0.3451	0.378	0.4378	0.3279	0.2244	0.3109	0.279	0.2506	0.1155	0.2875	0.2961
CLCN6	689	ES	13	12	14	0	0.9494	0.867	0.178	0.6832	0.6549	0.7694	0.7539	1	0.8467		0.7072		0.4492	0.4632	0.7137	0.6244	0.454	0.7753	0.713	1	0.6549	0.9318	0.4371	0.7072		0.4251	0.4894	0.6832	0.6668	0.6617	1	0.4461					0.9431		0.8706	0.7072	0.8859		0.8097
CLCN6	690	ES	3	2	4	0	0.8586	0.1795	0.0129	1	1	1	1	1	1		1		1	1	1	1	1	1	1		1	1	1	1		1	1	1	1	1	1	1			1	1	1		1	1	1	1	1
KIAA2013	693	AT	2.2			0	1	0.1737	0.0208	0.0447	0.0459	0.0437	0.0475	0.0244	0.0388	0.0211	0.0509	0.02	0.0558	0.0871	0.0474	0.0553	0.0412	0.0244	0.0704	0.0218	0.0433	0.0552	0.0558	0.029	0.0124	0.0443	0.04	0.0422	0.0195	0.0244	0.0289	0.0252	0.0427	0.0108	0.016	0.0121	0.0217	0.0388	0.0141	0.0562	0.0421	0.0132	0.0647
KIAA2013	694	AT	3			0	1	0.1737	0.0208	0.9553	0.9541	0.9563	0.9525	0.9756	0.9612	0.9789	0.9491	0.98	0.9442	0.9129	0.9526	0.9447	0.9588	0.9756	0.9296	0.9782	0.9567	0.9448	0.9442	0.971	0.9876	0.9557	0.96	0.9578	0.9805	0.9756	0.9711	0.9748	0.9573	0.9892	0.984	0.9879	0.9783	0.9612	0.9859	0.9438	0.9579	0.9868	0.9353
PLOD1	695	ES	2	1	3	0	0.9965	0.4649	0.0474	0.0221	0.0174	0.0409	0.0513	0.0449	0.0351	0.0201	0.0458	0.2351	0.098	0.2282	0.134	0.1937	0.1316	0.0726	0.0356	0.0635	0.0655	0.1197	0.0445	0.1231	0.0494	0.0989	0.0642	0.0646	0.0857	0.0479	0.124	0.0458	0.1937	0.2008	0.0527	0.0552	0.0329	0.0545	0.0653	0.0638	0.0159	0.0205	0.0177
MFN2	696	ES	2	1	3	0	0.9983	0.2093	0.032	0.9556	0.9322	0.9708	0.9667	0.989	1	0.9867	0.9284		0.9278	0.8605	0.9804	1	0.9529	0.9734	0.9382	0.9016	0.9483	0.9376	0.9331	0.9614	1	0.9719	0.9393	0.922	0.9638	0.9729	0.8343	0.9484	0.9697	0.8308	1	0.9199	0.9457	1	0.9895	0.9601	0.9357	0.9584	0.9438
MIIP	697	ES	8	7	9	0	0.993	0.0391	0.0039	1	1	1	1	1	0.9947	1	1	0.996	0.9951	1	0.9887	1	1	1	1	1	1	1	0.9955	0.9921	1	1	1	1	1	1	1	0.9957	1	1	1	1	1	1	0.9961	1	1	1	1
TNFRSF1B	702	AT	5			0	1	0.0156	0.0008	0	0	0	0	0	0	0	0	0	0	0	0	0	0	0	0	0	0	0	0	0	0	0	0	0	0	0	0	0	0	0	0	0	0	0	0	0	0	0	0
TNFRSF1B	703	AT	11			0	1	0.0156	0.0008	1	1	1	1	1	1	1	1	1	1	1	1	1	1	1	1	1	1	1	1	1	1	1	1	1	1	1	1	1	1	1	1	1	1	1	1	1	1	1	1
PDPN	710	AP	1.1			0	0.9913	0.7067	0.0677	0.9782	1	0.9838	1	0.9729	0.9701	0.9367	0.8041	0.3798	0.9252	1	1	0.9116	0.971	0.9588	0.9792	0.9588	0.987	1	0.988	0.6909	1	1	1	0.9568	0.9591	0.8187	1	0.984	0.969	0.5818	1	0.7805	0.9713	0.8354	0.977	1	1	1	1
PDPN	711	AP	2			0	0.9913	0.6202	0.0354	0.0218	0	0.0162	0	0.0271	0.0117	0	0.0302	0.6202	0	0	0	0.0496	0	0.0231	0.0208	0.0412	0	0	0	0	0	0	0	0	0	0.1017	0	0	0	0.0277	0	0.123	0.0077	0.1646	0	0	0	0	0
PDPN	712	AP	3.1			0	0.9913	0.7067	0.0595	0	0	0	0	0	0.0183	0.0633	0.1657	0	0.0748	0	0	0.0388	0.029	0.0181	0	0	0.013	0	0.012	0.3091	0	0	0	0.0432	0.0409	0.0796	0	0.016	0.031	0.3904	0	0.0965	0.021	0	0.023	0	0	0	0
PDPN	713	AD	8.2	8.1	9	0	0.9686	0.6186	0.0807	0.5789	0.5841	0.5437	0.5639	0.4514	0.5888	0.5981	0.5685	0.6519	0.5151	0.4353	0.6327	0.6094	0.5841	0.6825	0.5429	0.5653	0.6161	0.5008	0.6631			0.5169	0.6519	0.624	0.5519	0.7662		0.6519	0.5148	0.5783	0.6239	0.6425	0.5927	0.7374	0.4946	0.5142	0.6371	0.4636	0.6119
PDPN	714	ES	6	5	7	0	0.993	0.0597	0.0065	1	1	1	1	1	1	1	1	1	1	0.9532	0.9873	0.9796	1	1	0.9947	1	1	1	0.9931	1		1	0.9403	1	1	1	1	0.9897	1	1	1	0.9768	0.9965	1	1	1	1	1	1
PDPN	717	AD	1.2	1.1	5	0	0.8901	0.1	0.0123	0.013		0	0	0	0.0067	0	0		0	0	0	0	0	0.0244	0.0167	0	0	0	0.0182			0		0	0.0233			0.0099	0	0.027	0	0.0326	0		0.0182	0.0278	0	0	0
PRDM2	721	AT	11			0	1	0.4276	0.0809	0.6495	0.5321	0.6503	0.7654	0.8366	0.6895	0.7933	0.8048	0.8174	0.7604	0.8741	0.7775	0.8249	0.7559	0.7479	0.8714	0.7376	0.8407	0.8544	0.8476	0.9531	0.7906	0.8787	0.8469	0.8481	0.8344	0.7623	0.917	0.8839	0.8899	0.845	0.6303	0.8892	0.8138	0.7699	0.8241	0.8711	0.7655	0.7609	0.809
PRDM2	722	AT	13			0	1	0.4276	0.0809	0.3505	0.4679	0.3497	0.2346	0.1634	0.3105	0.2067	0.1952	0.1825	0.2396	0.1259	0.2225	0.1751	0.2441	0.2521	0.1286	0.2624	0.1593	0.1456	0.1524	0.0469	0.2094	0.1213	0.1531	0.1519	0.1656	0.2377	0.083	0.1161	0.1101	0.155	0.3697	0.1108	0.1862	0.2301	0.1759	0.1289	0.2345	0.2391	0.191
PRDM2	723	ES	10	9	12	0	0.918	1	0.1839	1	0.8967	0.8909	0.5198		0.7142	0.9173	1	0.4302	1	1		0.794	0.8687	0.834	1	1	0.8261	1	1			1	0.6623	0.8926	0.8428	0.8911	1			0.1381	0.2815	1	0.7343	0.7959	0.7744	0.7177	0.6609	0.421	1
PRDM2	724	ES	08:09:10	7	12	0	0.8255	1	0.3277	0.3614		0.2056	0.1005			1	0.5122	1	0.3494			0.1776	0.3386	0.5571	0.6701	1	0.3421	0.6454	1			0.1875	0.221	1	1	0.3945	1			0.2787	0.3085		0.3292	0.1565	0.4808	0.1365	0.3784	0.3586	0.1193
PRDM2	725	ES	09:10:00	7	12	0	0.9127	0.8562	0.2064	0.8573	0.8106	0.8368	0.4896		0.7125	1	0.8187	1	0.7201	0.2874		0.6266	0.625	0.8967	0.8358	1	0.8988	0.8284	1			0.6557	0.4058	1	1	0.8809				0.2812	0.3075	0.3356	0.7455	0.7854	0.8058	0.5228	0.5651	0.549	0.2588
PRDM2	728	ES	8	7	9	0	0.8307	0.6814	0.1023	0.1	0	0.0526	0.1196		0	0.449	0.2075			0	0.0803	0.1325	0.2588	0.1325	0.3039		0.0636	0.2922	0.1583	0.1089		0.1196	0.3143	0.1692	0.1692			0.3284	0.071				0.1618	0.0526	0.201	0.1401			0.3143
KAZN	733	AT	11.2			0	1	0.8366	0.1391	0.6081	0.6608	0.7554	0.6188	0.9178	0.7102	0.7751	0.2339	0.7901	0.6304	0.6687	0.5476	0.5202	0.6091	0.8234	0.7508	0.5847	0.4563	0.8043	0.6396	0.807	0.7957	0.6533	0.6309	0.5911	0.68	0.6208	0.636	0.69	0.4323	0.9094	0.7072	0.632	0.8661	0.9544	0.7522	0.8708	0.7166	0.5171	0.681
KAZN	734	AT	18			0	1	0.8366	0.1391	0.3919	0.3392	0.2446	0.3812	0.0822	0.2898	0.2249	0.7661	0.2099	0.3696	0.3313	0.4524	0.4798	0.3909	0.1766	0.2492	0.4153	0.5437	0.1957	0.3604	0.193	0.2043	0.3467	0.3691	0.4089	0.32	0.3792	0.364	0.31	0.5677	0.0906	0.2928	0.368	0.1339	0.0456	0.2478	0.1292	0.2834	0.4829	0.319
TMEM51	736	AP	2			0	0.9791	0.8626	0.161	0.4205	0.6779	0.2951	0.3687	0.5944	0.3129	0.5444	0.3087		0.62	0.3619	0.2784	0.3087	0.1553	0.5222	0.1547	0.3732	0.391	0.5275	0.4012	0.3367	0.4718	0.2951	0.5037	0.3947	0.3583	0.3087	0.7362	0.5551	0.6579	0.4685		0.5274	0.3167	0.3944	0.3886	0.2557	0.7962	0.2281	0.5568
TMEM51	737	AP	1			0	0.9791	0.8626	0.161	0.5795	0.3221	0.7049	0.6313	0.4056	0.6871	0.4556	0.6913		0.38	0.6381	0.7216	0.6913	0.8447	0.4778	0.8453	0.6268	0.609	0.4725	0.5988	0.6633	0.5282	0.7049	0.4963	0.6053	0.6417	0.6913	0.2638	0.4449	0.3421	0.5315		0.4726	0.6833	0.6056	0.6114	0.7443	0.2038	0.7719	0.4432
TMEM51	738	AA	5.1	4	5.2	0	0.9703	0.2388	0.0281	1	0.9813	0.9315	0.9497	1	0.963	0.9583	0.9744		0.9829	0.9511	0.981	0.964	0.9667	0.9111	0.9787	0.9054	0.9372	1	0.9817	1	0.8271	0.9627	0.9101	0.9749	1	0.9613		0.9323	1	0.9773		1	0.9721	1	0.9902	0.9491	1	0.9841	0.9503
TMEM51	739	ES	3	2	4	0	0.8709	0.8459	0.1458	0.7404	0.6555	0.6297	0.5954	0.9275	0.3586	0.5848	0.593		0.7641	0.5961	0.5843		0.5037	0.5829	0.6659	0.8677	0.6442		0.6627	1			0.7063	0.7052	0.4704	0.7961		0.688	0.6521	0.4315			0.6116		0.6414	0.6783	0.5818	0.861
FHAD1	747	AT	15.2			0	0.9948	0.8761	0.2194	0.2696	0.3709	0.1811	0.0882		0.3045	0	0.3572	0.6842	0.4693	0	0.39	0.1241	0.0774	0.54	0.4243	0	0.1578	0	0.7924	0	0.6519	0.0973	0.2559	0.5147	0.1671	0.1925	0.1498	0.2174	0.1912	0.1261	0	0.5445	0.6624	0.33	0.0996	0.325	0.4522	0.3454	0.188
FHAD1	748	AT	34			0	0.9948	0.4126	0.0581	0	0	0	0		0	0	0	0	0	0	0	0	0.1186	0.1182	0	0	0.2416	0	0	0	0	0	0	0.0303	0	0	0	0	0.2928	0.1931	0	0	0.0362	0	0.0654	0	0	0.1764	0
FHAD1	749	AT	36			0	0.9948	0.8761	0.2226	0.7304	0.6291	0.8189	0.9118		0.6955	1	0.6428	0.3158	0.5307	1	0.61	0.8759	0.804	0.3418	0.5757	1	0.6006	1	0.2076	1	0.3481	0.9027	0.7441	0.455	0.8329	0.8075	0.8502	0.7826	0.5161	0.6808	1	0.4555	0.3013	0.67	0.8351	0.675	0.5478	0.4782	0.812
CASP9	758	AP	2			0	0.9825	0.2957	0.0486	1	0.9554	1	0.9312	1	1	0.8875	1	1	1	0.9505	0.9365	0.8848	0.9214	1	0.9622	1	0.9841	0.9845	1	1	0.7043	1	0.8749	0.9746	1	0.9554	1	0.9871	1	1	1	1	0.9844	1	0.9536	1	1	1	1
CASP9	759	AP	1			0	0.9825	0.2957	0.0486	0	0.0446	0	0.0687	0	0	0.1125	0	0	0	0.0495	0.0635	0.1152	0.0786	0	0.0378	0	0.0159	0.0155	0	0	0.2957	0	0.1251	0.0254	0	0.0446	0	0.0129	0	0	0	0	0.0156	0	0.0464	0	0	0	0
CASP9	760	RI	9.2	9.1	9.3	0	0.9948	0.2955	0.0271	0.0213	0.0056	0.0066	0.0232	0.0165	0.0359	0	0.0239	0.0092	0.0311	0.0379	0.0817	0.0252	0.0171	0.0128	0.0043	0.0167	0.0101	0.021	0.007	0.0314	0.0445	0.0106	0.0344	0.0092	0.0228	0.0062	0.0445	0.028	0.0359	0.046	0	0.0086	0.007	0.0092	0.0131	0.0088	0.0207	0.0183	0.0338
CASP9	761	ES	4:5:6:7	3.2	8	0	0.9983	0.5585	0.0523	0.9769	0.9391	0.9763	0.9546	1	0.9702	0.92	1	1	0.9705	1	0.9709	0.9822	0.9818	0.9828	0.9862	0.9207	0.9922	0.9586	0.9687	0.9022	0.945	0.9156	0.948	0.9353	1	1	1	0.9531	1	1	0.7568	1	0.9382	0.8457	0.9624	0.9395	0.9071	0.9407	0.8709
CASP9	762	AD	3.2	3.1	4	0	0.9965	0.0348	0.0034	1	0.9652	1	1	1	1	1	1	1	1	1	1	1	1	1	0.9855	1	1	1	1	1	1	1	1	1	1	1	1	1	1	1	1	1	1	1	1	1	1	1	1
DNAJC16	763	AT	13.3			0	1	0.2818	0.0414	0.1198	0.1017	0.0991	0.1259	0.0726	0.032	0.077	0.0553	0.0357	0.121	0.1686	0.1372	0.1309	0.0708	0.0407	0.065	0.0275	0.1009	0.0465	0.1286	0.1146	0.0213	0.0431	0.1039	0.0893	0.0759	0.0613	0.0646	0.0634	0.0763	0	0.0487	0.06	0.0213	0.0835	0.0424	0.1023	0.0151	0.0205	0.1439
DNAJC16	764	AT	16			0	1	0.2345	0.0233	0.0249	0.0545	0.0135	0.0242	0.0241	0.0443	0.014	0.0368	0.0277	0.0355	0.0919	0.0529	0.0492	0.0147	0.0321	0.0207	0.0092	0.0361	0.0274	0.0275	0.0299	0.0655	0.0358	0.05	0.0186	0.0613	0.0275	0.0344	0.0516	0.0345	0.0315	0.0325	0.0561	0.0112	0.0231	0.0102	0.0302	0.0176	0.029	0.0303
DNAJC16	765	AT	15			0	1	0.4547	0.055	0.8553	0.8439	0.8874	0.8498	0.9032	0.9238	0.909	0.9079	0.9365	0.8434	0.7395	0.8099	0.8199	0.9145	0.9272	0.9143	0.9633	0.863	0.9261	0.8438	0.8556	0.9132	0.9211	0.8462	0.8921	0.8628	0.9112	0.901	0.885	0.8892	0.9685	0.9188	0.884	0.9674	0.8934	0.9474	0.8675	0.9672	0.9505	0.8258
DNAJC16	766	AD	13.2	13.1	14	0	0.8342	0.3837	0.0509	0		0	0	0	0.0524				0		0.0657	0.0386	0	0	0.0324		0	0	0	0	0.151		0	0		0	0.1347	0.2279					0	0.0394	0	0	0.0485		0
PLEKHM2	767	ES	7	6	8	0	0.9965	0.75	0.119	0.8251	0.7268	0.8008	0.7993	0.7658	0.7574	0.9438	0.659	0.8063	0.8592	0.6856	0.7012	0.9215	0.8987	0.7062	0.5716	0.6719	0.731	0.5708	0.4805	0.5706	0.6647	0.8337	0.7248	0.7752	0.7574	0.6733	0.7483	0.6095	0.929	1	1	0.25	0.9051	0.4769	0.8663	0.5789	0.9433	0.788	0.7235
FBLIM1	768	AP	5.1			0	0.9389	0.5518	0.0865	0	0.0386	0	0.0892	0.1574	0	0.1491	0		0	0	0	0	0	0.1137	0.122		0.0179	0	0	0.3236	0.0582	0.3238	0.0329	0	0.2726	0	0	0	0			0	0		0	0.078	0	0	0
FBLIM1	769	AP	3			0	0.9389	1	0.2919	0.1479	0.0447	0.5091	0.7862	0.2374	0.8089	0.1557	0.1439		0.5141	0.1395	0.1993	0.1993	0.6776	0.277	0.7643		0.0958	0.951	0.1731	0.5256	0.0472	0.6762	0.0612	1	0.7274	0.1775	0.0854	0.1107	1			0.1727	0.1636		0.153	0.1041	1	0.5545	0.2719
FBLIM1	771	AP	1			0	0.9389	1	0.3021	0.8521	0.9167	0.4909	0.1247	0.6052	0.1911	0.6951	0.8561		0.4859	0.8605	0.8007	0.8007	0.3224	0.6093	0.1137		0.8863	0.049	0.8269	0.1508	0.8946	0	0.9059	0	0	0.8225	0.9146	0.8893	0			0.8273	0.8364		0.847	0.8179	0	0.4455	0.7281
FBLIM1	772	AT	11			0	1	0.5112	0.0745	0.7859	0.7249	0.7247	0.7653	0.8662	0.7551	0.8338	0.8093	0.7271	0.7059	0.6439	0.6521	0.601	0.6971	0.7906	0.7388	0.7222	0.8116	0.7556	0.7763	0.7395	0.8246	0.7461	0.7334	0.7562	0.6758	0.7383	0.7217	0.749	0.6658	0.6492	0.7391	0.6544	0.8654	0.7018	0.7975	0.8273	0.8554	0.8274	0.68
FBLIM1	773	AT	9.2			0	1	0.5112	0.0745	0.2141	0.2751	0.2753	0.2347	0.1338	0.2449	0.1662	0.1907	0.2729	0.2941	0.3561	0.3479	0.399	0.3029	0.2094	0.2612	0.2778	0.1884	0.2444	0.2237	0.2605	0.1754	0.2539	0.2666	0.2438	0.3242	0.2617	0.2783	0.251	0.3342	0.3508	0.2609	0.3456	0.1346	0.2982	0.2025	0.1727	0.1446	0.1726	0.32
FBLIM1	774	ES	06:07:00	5.2	8	0	0.9965	0.1069	0.019	0.9809	0.9738	0.9769	0.983	1	0.9802	0.974	0.9936	1	0.9611	0.9851	1	1	1	0.9868	1	1	0.9699	1	0.9883	1	0.9365	1	1	0.9726	0.9602	1	1	0.9562	1	1	1	1	1	1	0.9914	0.9879	0.9881	1	1
FBLIM1	775	AA	4.1	3	4.2	1	0.8674	0.7606	0.1143	0.4105	0.3672	0.4204	0.4744	0.6049	0.4318	0.4462	0.3672		0.2858	0.3607	0.392	0.4462	0.4594	0.4916	0.5417		0.381	0.461	0.3523	0.6592		0.4462		0.4916	0.3495	0.4462		0.3259					0.3868		0.4362	0.4678	0.3636		0.4129
ZBTB17	778	AA	14.1	13	14.2	0	0.9825	0.4298	0.045	0.1894	0.139	0.1219	0.0592	0.0545	0.0987	0.0877	0.1186	0.1158	0.0674	0.139	0.0545	0.0737	0.0907	0.0287	0.0621	0.0665	0.1061	0.0862	0.1024	0.0998	0.0972	0.0346	0.0783	0.0651	0.1724	0.0783	0.1344	0.0679	0	0.0783	0.1072	0.1737	0.1057	0	0.0803	0.0511	0.0437	0.1124	0.1186
ZBTB17	779	RI	9.2	9.1	9.3	0	0.9808	0.5985	0.0964	0.1575	0.1827	0.1079	0.2177	0.0345	0.4	0.0236	0.1908	0.1666	0.3611	0.1615	0.3244	0.345	0.2363	0.1926	0.1517	0.1745	0.1206	0.1091	0.1443	0.237	0.309	0.1353	0.3819	0.1608	0.2022	0.2296	0.5985	0.2902	0.2347	0.0611	0.1241	0.1297	0.0282	0.0396	0.0579	0.0847	0.1095	0.1164	0.1644
ZBTB17	780	AA	5.1	4	5.2	0	0.9511	0.2316	0.0382	0	0.0719	0.106	0.058	0	0	0.069	0.0449	0.1096	0.023	0.0602	0.0936	0.023	0.07	0.0758	0.0183		0.0329	0.0217	0	0.0415	0.0678	0.0625	0	0.0541	0.0404	0	0	0.0496				0.2316	0.0194	0	0.0223	0	0	0.0964	0.1379
ZBTB17	782	ES	4	3	5.2	0	0.9965	0.3441	0.0291	1	0.9571	0.9766	0.986	1	1	0.9505	0.9703	1	0.9658	1	0.9833	0.9698	0.9826	0.9827	0.9833	1	0.9687	1	1	0.9638	0.9603	1	0.9355	0.9857	1	0.8689	1	0.9439	0.8843	1	1	1	0.986	0.9612	0.9689	0.9313	0.9338	1	1
ZBTB17	784	ES	3	2	4	0	1	0.1681	0.0223	1	0.9727	1	1	1	0.9552	0.8983	1	1	1	1	1	0.9771	0.9687	1	0.9777	1	1	0.9659	0.9623	0.9807	1	0.9078	1	1	1	1	1	1	0.9005	1	1	1	1	1	1	1	0.9716	1	1
HSPB7	785	AP	1			0	0.8726	0.7447	0.1736	0.0314		0.142	0.3933	0.1737	0.0573	0	0.1563	0.3572	0.4636	0.4279	0.5738	0.3743	0.2661	0.1955	0.3831	0.3933	0.7	0.3445	0.2612	0.6184	0.1563	0.2174	0	0.5979	0	0.1026	0.3017	0.1346	0.4306			0	0		0.2905	0.4111		0.5645	0.2081
HSPB7	786	AP	2.1			0	0.8726	0.7447	0.1736	0.9686		0.858	0.6067	0.8263	0.9427	1	0.8437	0.6428	0.5364	0.5721	0.4262	0.6257	0.7339	0.8045	0.6169	0.6067	0.3	0.6555	0.7388	0.3816	0.8437	0.7826	1	0.4021	1	0.8974	0.6983	0.8654	0.5694			1	1		0.7095	0.5889		0.4355	0.7919
HSPB7	787	AT	3			0	0.9983	0.2426	0.0197	0	0	0	0	0	0	0	0	0	0.1705	0	0	0	0	0	0	0	0	0	0	0	0	0	0	0	0	0	0	0	0	0	0	0	0	0	0	0	0	0	0
HSPB7	788	AT	5			0	0.9983	0.2426	0.0197	1	1	1	1	1	1	1	1	1	0.8295	1	1	1	1	1	1	1	1	1	1	1	1	1	1	1	1	1	1	1	1	1	1	1	1	1	1	1	1	1	1
SZRD1	802	RI	5.2	5.1	5.3	0	1	0.0114	0.0009	1	1	1	1	1	1	1	1	1	1	1	1	1	1	1	1	1	1	1	1	1	1	1	1	1	1	1	1	1	1	1	1	1	1	1	1	1	1	1	1
SZRD1	803	AA	4.1	3	4.2	0	0.993	0.6393	0.0818	0.7614	0.6735	0.6218	0.6544	0.7437	0.7174	0.5988	0.5089		0.6929	0.6476	0.7343	0.5845	0.6322	0.6803	0.7169	0.7586	0.6929	0.6592	0.7098	0.6351	0.8969	0.6851	0.6592	0.6752	0.6394	0.6137	0.6394	0.518	0.6592	0.7105	0.5803	0.6353	0.6564	0.5675	0.6351	0.5584	0.6592	0.5473	0.8286
SZRD1	804	ES	2	1	3	0	0.9791	0.9065	0.089	0.0162	0.0064	0.02	0.0055	0	0	0	0		0.0138	0.0392	0.0824	0.0215	0.0261	0	0	0	0.0082	0.0025	0	0.0319	0.2878	0.0403	0.0162	0		0.0181		0	0.0442	0.007	0	0	0.004	0	0	0	0	0	0.0175
SZRD1	805	ES	02:03:00	1	4.1	0	0.9948	0.6662	0.0638	0.0079	0.0028	0.0076	0.003	0	0	0	0	0	0.0062	0.0181	0.0357	0.0091	0.0136	0	0	0	0.0043	0.0013	0	0.0136	0.2802	0.0211	0.0097	0	0	0.0101	0.0278	0	0.0309	0.0019	0	0	0.0018	0	0	0	0	0	0.0053
SZRD1	806	ES	3	1	4.1	0	0.9913	0.6358	0.09	0.4149	0.3546	0.3415	0.4259	0.4651	0.3608	0.7079	0.3331	0.3069	0.3277	0.4125	0.3653	0.3563	0.4059	0.2782	0.4997	0.2948	0.4127	0.3986	0.4358	0.3098	0.5444	0.4303	0.4682	0.4582	0.4324	0.4285	0.5027	0.3494	0.4864	0.2602	0.2744	0.3473	0.4053	0.2883	0.4408	0.2375	0.2222	0.3571	0.3026
SZRD1	807	ES	00:03:04.100000	1	4.2	0	0.9913	0.8502	0.0702	0.0106	0.004	0.0095	0.0036	0	0	0	0	0	0.0067	0.0219	0.045	0.0128	0.0203	0	0	0	0.0035	0.0012	0	0.0121	0.1294	0.021	0.0073	0	0	0.0139	0.031	0	0.0489	0.0028	0	0	0.0021	0	0	0	0	0	0.0061
SZRD1	808	ES	00:03:04.100000	1	4.2	0	0.993	0.6972	0.0982	0.4835	0.4396	0.3889	0.4641	0.4007	0.3377	0.6627	0.2895	0.394	0.3426	0.4565	0.4192	0.4353	0.5031	0.3508	0.5603	0.3305	0.3588	0.3808	0.4171	0.2828	0.3102	0.4251	0.3925	0.4576	0.4684	0.504	0.5268	0.2969	0.6009	0.3415	0.3748	0.3699	0.4414	0.3285	0.4452	0.2613	0.1847	0.3346	0.3281
SZRD1	809	AA	4.1	1	4.2	0	0.9948	0.6056	0.0675	0.566	0.5851	0.5481	0.5357	0.4318	0.4716	0.4447	0.4462	0.5919	0.5138	0.5417	0.5534	0.5792	0.5942	0.5807	0.5576	0.5386	0.4403	0.4783	0.4779	0.4646	0.2711	0.4916	0.4204	0.4964	0.5333	0.5725	0.5211	0.4373	0.6111	0.593	0.6104	0.5216	0.5339	0.5441	0.5014	0.5287	0.4393	0.4722	0.5265
SZRD1	810	ES	02:03:00	1	4.2	0	0.9895	0.6037	0.0493	0.0032	0.0019	0.0057	0.0018	0	0	0	0	0	0.0029	0.0117	0.0163	0.0089	0.0116	0	0	0	0.0015	0.0006	0	0.0068	0.0164	0.0095	0.0037	0	0	0.0085	0.0172	0	0.0253	0.0011	0	0	0.0011	0	0	0	0	0	0.0012
SZRD1	811	ES	3	1	4.2	0	0.9895	0.7603	0.0865	0.2247	0.2731	0.2767	0.3112	0.1855	0.1656	0.5654	0.2798	0.1173	0.1858	0.3111	0.2052	0.3513	0.3678	0.2006	0.3321	0.1344	0.1968	0.2391	0.2243	0.1829	0.0486	0.2513	0.2482	0.2862	0.3293	0.3872	0.3829	0.2797	0.4348	0.1727	0.3	0.2499	0.2901	0.2692	0.3129	0.2165	0.1037	0.2913	0.0907
NECAP2	821	RI	9.3	9.2	9.4	0	1	0.0461	0.0072	0.9871	0.9853	0.993	0.9764	0.9676	0.9814	0.9938	0.9931	0.995	0.9782	0.9845	0.9925	0.9816	0.9797	0.9792	0.9774	0.9887	0.9815	0.9837	0.9869	0.9909	0.9588	0.9869	0.9887	0.9852	0.9949	0.9924	0.9886	0.9823	0.9842	1	0.9742	0.9755	0.9892	0.9915	0.9795	0.9843	0.9924	0.9927	0.9951
NECAP2	822	RI	9.2:9.3:9.4	9.1	9.5	0	1	0.0378	0.0065	0.9974	0.9849	0.9883	0.9858	0.9928	0.9763	1	0.9797	0.9832	0.9899	0.9933	0.9975	0.9937	0.9934	0.9783	0.9928	0.9684	0.9931	0.9848	0.9934	0.99	0.9949	0.9926	1	0.9956	0.9859	0.9929	0.9906	0.9753	1	0.9936	0.968	0.9952	0.9883	0.9914	0.9908	0.9944	0.9852	0.9773	0.9892
NECAP2	823	ES	9.2:9.4	9.1	9.5	0	0.9686	0.8781	0.1823	0.8499	0.5047	0.3996	0.6568	0.8252	0.474		0.2927	0.292	0.708	0.7282	0.7782	0.7634	0.7806	0.5237	0.7669	0.301	0.7317	0.5305	0.6732	0.5021	0.9116	0.6816	1	0.7976	0.2871	0.5555	0.6042	0.4564	1		0.4884	0.8572	0.502	0.5243	0.7259	0.756	0.3607	0.2798	0.3382
NECAP2	824	ES	8	7	9.1	0	1	0.0756	0.0125	0.9859	0.9463	0.9817	0.984	0.9785	0.9757	0.983	0.9716	0.9901	0.9846	0.9799	0.9958	0.9666	0.9606	0.9738	0.9765	1	0.9874	0.9726	0.9898	0.9707	0.9866	0.9676	0.9867	0.9721	0.9678	0.9686	1	0.9856	0.966	0.9837	1	0.9466	0.972	0.988	0.9806	0.9842	0.9722	0.9746	0.9561
NECAP2	825	ES	6	5	7	0	1	0.4854	0.038	0.0055	0.005	0.0102	0.0292	0.0183	0.0194	0	0.0033	0	0.0147	0.0071	0.0429	0.0166	0.0173	0.0217	0.0196	0	0.0113	0.0117	0.0174	0.0587	0	0.0086	0.011	0.0085	0	0.0297	0	0.0399	0	0.0031	0.01	0.0148	0.0051	0.0215	0.0169	0.0164	0.0067	0	0.0495
NECAP2	826	ES	4	3	5	0	1	0.0731	0.0034	1	1	1	1	1	1	1	1	1	1	1	1	1	1	1	1	1	1	1	1	1	1	1	1	1	1	1	1	1	1	1	1	0.9964	1	1	1	1	1	1	1
NECAP2	827	ES	2	1.2	3	0	0.9965	0.0261	0.0026	1	1	1	1	1	1	1	0.9922	1	1	1	1	1	0.9969	1	1	1	1	1	1	1	1	1	1	1	1	1	1	1	1	1	1	1	1	1	1	1	1	1	1
NECAP2	828	AD	1.2	1.1	2	0	0.993	0.0508	0.0058	0.9875	0.9748	0.9825	1	1	1	1	1	1	0.9932	1	1	1	0.9958	1	1	1	0.9933	1	1	1	1	0.9492	1	0.9922	1	1	1	1	1	1	1	1	1	0.9897	0.9956	1	0.9854	0.9908	1
NBPF1	830	AP	1			0	0.9616	0.9289	0.1458	0.5806	0.8189	0.704	0.6691	0.8135	0.4736	0.5793	0.7758		0.7382	0.7106	0.732	0.3998	0.6924	0.6474	0.4367		0.7723	0.6785	0.6596	0.4921	0.6596	0.3264	0.5306	0.77	0.6934	0.7245	0.6596	0.5122				0.795	0.5568	0.5255	0.4256	0.6223	0.6533	0.7842	0.6176
NBPF1	831	AP	3			0	0.9616	0.9289	0.1458	0.4194	0.1811	0.296	0.3309	0.1865	0.5264	0.4207	0.2242		0.2618	0.2894	0.268	0.6002	0.3076	0.3526	0.5633		0.2277	0.3215	0.3404	0.5079	0.3404	0.6736	0.4694	0.23	0.3066	0.2755	0.3404	0.4878				0.205	0.4432	0.4745	0.5744	0.3777	0.3467	0.2158	0.3824
NBPF1	835	ES	25	24	26	0	0.9948	0.4684	0.0556	0.9021	0.9389	0.9373	0.8867	1	0.9184	0.8468	1		0.9549	0.8242	0.8753	0.8819	0.9079	0.9715	0.9452	0.8748	0.9244	0.9789	0.9646	0.9634	0.9646	0.9122	0.9087	0.8825	0.9254	0.9357	0.9167	0.9082	1	1	0.8158	0.9153	0.9369	0.9244	0.972	0.9654	0.9811	0.8482	0.9612
NBPF1	836	ES	10:11:12:13:14:15	9	16	0	1	0.9027	0.1027	0.8363	0.9344	0.8254	0.8223	0.6493	0.6595	0.5189	0.8144	1	0.6937	0.8149	0.8527	0.7191	0.7776	0.864	0.8695	0.7659	0.6926	0.7907	0.6169	0.7251	0.6906	0.6535	0.6831	0.6587	0.8741	0.7906	0.6654	0.5717	0.7864	1	0.6483	0.7376	0.8931	0.7809	0.7841	0.8759	0.7395	0.7562	0.7714
MFAP2	839	AA	3.1	2	3.2	0	0.9529	0.4527	0.0648	0.9018	0.7946	0.7437	0.888	0.8811	0.9021	0.8196	0.8376	0.8969	0.7886	0.8886	0.9531	0.9263	0.8845	0.8764	0.9141		0.8559	0.8713	0.9641	0.6286	1	1	0.8286	0.8855	0.8735		0.7946	0.9508		0.853	0.7232	0.9551	0.8961	0.7437	0.9484	0.8746	0.8283	0.8955	0.9141
ATP13A2	840	ES	28	27	29	0	0.9913	0.1821	0.0263	0.9553	0.9215	0.921	0.975	0.9709	0.955	0.8584	0.9585	0.9067	0.9007	0.9851	0.9547	0.9814	0.9921	0.9336	0.967	0.9774	0.994	0.9518	0.9246	0.9819	0.9693	0.9744	0.9516	0.9728	0.9438	0.9185	0.9432	0.9001	0.9598	0.9529	0.9544	0.9403	0.907	0.9592	0.9385	0.9406	0.9738	0.9459	0.9779
ATP13A2	841	ES	22	21	23	0	0.9965	0.1214	0.0144	1	0.985	0.9664	1	0.9924	0.9886	1	0.9795	1	1	1	0.9657	0.9855	1	0.9958	0.9805	1	1	1	0.9809	0.9794	0.9857	0.9908	0.9834	0.9851	1	1	1	0.9888	1	1	1	0.974	0.9922	1	0.9948	0.9932	0.9875	1	1
ATP13A2	842	AD	5.2	5.1	6	0	0.9651	0.9213	0.0982	0.5393	0.5042	0.7094	0.565	0.4007	0.5497	0.3905	0.4686		0.5447	0.451	0.475	0.5209	0.6195	0.6255	0.583	0.5325	0.4888	0.4752	0.6503	0.7193		0.603	0.4695	0.5049	0.5062	0.5875	0.5875	0.5813		0.7193		0.5882	0.4926	0.5911	0.5992	0.5297	0.5702	0.7193	0.494
PADI2	843	AT	11.2			0	1	0.2781	0.0271	0	0	0.0212	0	0	0.0462	0	0.0372	0	0	0	0	0	0.0467	0.0073	0.0224	0	0	0.038	0.0088	0	0	0.0095	0.0167	0.008	0	0	0	0	0.0619	0	0	0	0	0.0478	0.0146	0.2781	0	0.0261	0
PADI2	844	AT	16			0	1	0.2781	0.0271	1	1	0.9788	1	1	0.9538	1	0.9628	1	1	1	1	1	0.9533	0.9927	0.9776	1	1	0.962	0.9912	1	1	0.9905	0.9833	0.992	1	1	1	1	0.9381	1	1	1	1	0.9522	0.9854	0.7219	1	0.9739	1
PADI2	845	ES	8	7	9	0	0.7557	0.1791	0.015	1	1	1	1	1	1		1		1	1	1		1	1	1	1	1	1	1	1			1	1	1			1					1		1
PADI2	846	ES	05:06:00	4	7	0	0.8342	0.0601	0.0036	1	1	1	1	1	1	1	1		1	1	1	1	1	1	1	1	1	1	1	1		1	1	1	1			1					1	1	1			1	1
PADI4	851	AT	17			0	0.993	0.903	0.1974	0.1405	0.0578	0.197	0.0578	0.4397	0.1405	0.0614	0.1017	0.197	0.1157	0.1102	0.0255	0.1053	0.1381	0.4805	0.0655	0.164	0.1537	0.2884	0	0.0771	0.3592	0.0719	0.0289	0.0517	0.0418	0.1229	0.1017	0.1381	0	0.2346	0.1229	0.1697	0.2528	0.179	0.1204	0.2464		0.5309	0.3372
PADI4	852	AT	4			0	0.993	0.903	0.1974	0.8595	0.9422	0.803	0.9422	0.5603	0.8595	0.9386	0.8983	0.803	0.8843	0.8898	0.9745	0.8947	0.8619	0.5195	0.9345	0.836	0.8463	0.7116	1	0.9229	0.6408	0.9281	0.9711	0.9483	0.9582	0.8771	0.8983	0.8619	1	0.7654	0.8771	0.8303	0.7472	0.821	0.8796	0.7536		0.4691	0.6628
RCC2	853	AP	2.1			0	0.9756	0.5574	0.0803	0.094	0	0	0.0957	0.0865	0.336	0	0.197		0	0.1139	0.0417	0	0.1547	0.0476	0	0	0.0376	0.0485	0.0851	0.0361		0	0	0.0532	0		0.1836	0.2357	0.103	0		0	0.0399	0	0.043	0.0322	0.0894	0	0.0957
RCC2	854	AP	1			0	0.9756	0.5574	0.0803	0.906	1	1	0.9043	0.9135	0.664	1	0.803		1	0.8861	0.9583	1	0.8453	0.9524	1	1	0.9624	0.9515	0.9149	0.9639		1	1	0.9468	1		0.8164	0.7643	0.897	1		1	0.9601	1	0.957	0.9678	0.9106	1	0.9043
ARHGEF10L	855	AP	1			0	0.8709	1	0.2225	0.0947	0.5329	0.1295	0.6107		0.6467		0.2755		0.2034	0.8248	0.2719	0.6915	0.6691	0.6107	0.7385	0.8869	0.4315	0.6567	0.1875			0.6419		0.3067	0.3954	0.5406		0.7583	0.8071				0.6107	0.6107	0.8625	0.9165	0.3434	0.6107
ARHGEF10L	857	AP	4.1			0	0.8709	0.3684	0.0557	0	0	0.035	0		0		0		0	0	0	0	0.0579	0	0	0	0	0.0979	0			0		0	0.1425	0		0	0				0	0	0	0	0	0
ARHGEF10L	858	AP	10			0	0.8709	1	0.2327	0.9053	0.4671	0.8356	0.3893		0.3533		0.7245		0.7966	0.1752	0.7281	0.3085	0.273	0.3893	0.2615	0.1131	0.5685	0.2454	0.8125			0.3581		0.6933	0.4621	0.4594		0.2417	0.1929				0.3893	0.3893	0.1375	0.0835	0.6566	0.3893
ARHGEF10L	859	AT	22			0	1	0.308	0.0375	0.0899	0.06	0.0385	0.0642	0.0569	0.0649	0.0479	0.0361	0.0616	0.0813	0.0507	0.1908	0.0657	0.0663	0.0511	0.0486	0.0579	0.065	0.0773	0.0389	0.0906	0.0082	0.0448	0.0591	0.102	0.0563	0.0673	0.0611	0.037	0.0082	0.0461	0.0759	0	0.0165	0.0445	0.0099	0.0249	0.0122	0.0353	0.0753
ARHGEF10L	860	AT	30			0	1	0.0569	0.0053	0	0.0085	0.0093	0	0	0	0	0	0	0.0078	0.0111	0	0	0.0069	0	0	0	0	0	0	0	0	0	0	0	0	0	0	0	0	0	0	0	0	0	0	0	0	0	0
ARHGEF10L	861	AT	32			0	1	0.308	0.0381	0.9101	0.9315	0.9522	0.9358	0.9431	0.9351	0.9521	0.9639	0.9384	0.9108	0.9382	0.8092	0.9343	0.9268	0.9489	0.9514	0.9421	0.935	0.9227	0.9611	0.9094	0.9918	0.9552	0.9409	0.898	0.9437	0.9327	0.9389	0.963	0.9918	0.9539	0.9241	1	0.9835	0.9555	0.9901	0.9751	0.9878	0.9647	0.9247
ARHGEF10L	862	ES	18	17	19	0	0.9442	0.9133	0.1708	0.606	0.9365	0.4114	0.87	1	0.8849	0.6308	0.7936		0.6908	0.942	0.406	0.9302	0.8692	0.8703	0.8329	0.9111	0.861	0.7689	0.6916	1	1	0.4607	0.7736	0.5121	0.8507	0.7538	1	0.9472	0.8849	0.5731		0.5172	0.7918	0.9356	0.9484	0.4316	0.5235	0.865
ARHGEF10L	863	ES	14:15:00	13	16	0	0.993	0.0543	0.0059	1	0.9853	1	1	1	1	1	1	1	1	1	1	1	1	1	1	1	1	1	1	1	1	1	1	1	1	1	1	1	1	1	1	1	0.9927	1	1	1	1	1	1
ARHGEF10L	864	ES	8	7	9	0	0.815	0.1329	0.011	0	0.0112	0	0	0	0	0	0		0	0	0	0	0	0	0.0087	0	0.0106	0.0053		0	0	0	0	0	0	0		0					0	0	0	0			0
ALDH4A1	868	AP	1			0	0.7504	0.7148	0.0611	1	1	1	1	1			1		0.9301	1	1	1	0.8926	1	0.9811		0.9481	0.9734	1	1	0.8568	1	1	0.9507		1	1	0.8568					1		1	1
ALDH4A1	869	AP	2			0	0.7504	0.7148	0.0611	0	0	0	0	0			0		0.0699	0	0	0	0.1074	0	0.0189		0.0519	0.0266	0	0	0.1432	0	0	0.0493		0	0	0.1432					0		0	0
ALDH4A1	870	RI	16.2	16.1	16.3	0	1	0.0729	0.0079	1	1	1	1	1	1	1	1	1	1	1	1	1	1	1	0.9956	1	1	0.993	1	1	1	1	1	1	1	1	1	1	1	1	0.967	1	1	1	1	1	1	1	1
ALDH4A1	871	ES	13	12	14	0	0.9878	0.2964	0.0346	1	0.8296	1	0.9805	1	1	0.942	1	1	1	1	0.9701	1	0.9643	1	0.9922	1	0.9826	0.975	0.8882	1	1	1	1	1	0.9344	0.9486	1	0.8512	1	1	1	1	0.9484	1	1	0.9657	1	0.9517	1
UBR4	872	AP	74.1			0	1	0.8793	0.1152	0.285	0.3094	0.3996	0.175	0.1281	0.2272	0.3581	0.3279	0.6994	0.1424	0.3093	0.2031	0.2559	0.0964	0.2399	0.3366	0.3088	0.1773	0.1599	0.1955	0.1694	0.2228	0.1325	0.2642	0.2124	0.2277	0.2594	0.1849	0.2563	0.3288	0.3283	0.3041	0.2643	0.1667	0.467	0.2808	0.2578	0.1651	0.3457	0.1694
UBR4	875	AP	103.1			0	1	0.8867	0.113	0.1694	0.1777	0.1359	0.0998	0.1992	0.1528	0.2169	0.2507	0.2518	0.1546	0.1494	0.1867	0.167	0.1161	0.1084	0.0912	0.125	0.2399	0.1105	0.0852	0.1915	0.2475	0.12	0.2593	0.1282	0.1559	0.2333	0.2387	0.257	0.1883	0.2476	0.246	0.4124	0.1616	0.137	0.1399	0.1455	0.5936	0.2719	0.1878
UBR4	876	AP	86.1			0	1	0.7513	0.1434	0.3177	0.2865	0.2957	0.5893	0.3426	0.5064	0.2018	0.2838	0.0487	0.6375	0.4651	0.4985	0.4832	0.6894	0.5785	0.365	0.3274	0.287	0.4376	0.5882	0.5485	0.5008	0.7294	0.3819	0.479	0.5988	0.4702	0.5153	0.4511	0.4084	0.4241	0.4206	0.2559	0.2171	0.2839	0.4991	0.4925	0.1104	0.3587	0.4981
UBR4	877	AP	1			0	1	0.7282	0.1258	0.2279	0.2264	0.1688	0.1358	0.33	0.1136	0.2232	0.1376	0	0.0655	0.0763	0.1117	0.0939	0.0982	0.0732	0.2073	0.2388	0.2958	0.292	0.1311	0.0906	0.029	0.0181	0.0946	0.1804	0.0175	0.0372	0.0611	0.0356	0.0745	0	0.0293	0.0674	0.4547	0.1122	0.0802	0.1043	0.1309	0.0236	0.1447
UBR4	878	AT	107			0	1	0.5024	0.0507	0.9566	0.9558	0.9547	0.943	0.9787	0.9599	0.9612	0.9703	0.9709	0.958	0.9253	0.9414	0.9382	0.9455	0.976	0.962	0.9593	0.9365	0.9602	0.9669	0.9714	0.9776	0.9664	0.9648	0.9596	0.9526	0.9599	0.9727	0.9712	0.9595	0.9633	0.9596	0.9587	0.9641	0.9267	0.9671	0.9577	0.9776	0.9744	0.9487
UBR4	879	AT	78.6			0	1	0.5024	0.0507	0.0434	0.0442	0.0453	0.057	0.0213	0.0401	0.0388	0.0297	0.0291	0.042	0.0747	0.0586	0.0618	0.0545	0.024	0.038	0.0407	0.0635	0.0398	0.0331	0.0286	0.0224	0.0336	0.0352	0.0404	0.0474	0.0401	0.0273	0.0288	0.0405	0.0367	0.0404	0.0413	0.0359	0.0733	0.0329	0.0423	0.0224	0.0256	0.0513
UBR4	880	ES	105	104	106	0	1	0.0928	0.0073	0.0035	0.0059	0	0	0	0.0033	0	0	0	0.0025	0.0083	0.012	0.0134	0.0071	0.0114	0	0	0.0031	0.0026	0	0.012	0.0055	0	0	0.0067	0.0155	0.0089	0	0.0045	0	0.007	0.0096	0.0097	0	0.0151	0.0025	0.0046	0	0	0.0132
UBR4	881	ES	94	93	95	0	1	0.2316	0.0212	0.9847	0.9814	0.9783	0.9871	0.9925	1	0.9788	0.9511	0.9757	0.9821	0.9828	1	0.9675	0.9645	0.9822	0.9896	0.9762	0.9838	0.984	0.982	0.9503	0.903	0.9587	0.9847	0.9562	0.9821	1	1	0.993	0.9565	1	1	0.9673	0.9882	1	0.9671	0.9915	0.9833	0.9595	1
UBR4	882	ES	90	89	91	0	1	0.0296	0.0024	1	1	1	1	1	1	1	1	1	1	1	1	0.9907	0.9966	1	1	1	1	1	1	1	1	0.985	1	1	1	1	1	1	1	1	1	1	1	1	1	1	1	1	1
UBR4	883	RI	78.4	78.3	78.5	0	0.9372	0.7902	0.0661	0	0.0208	0	0.0369	0.0161	0	0.0011	0.0035		0.0281	0.141	0.0208	0.0434	0.0784	0.0075	0.0139	0.0135	0.0196	0.01	0.0105	0.0107	0.06	0.1031	0.0234	0.0272	0.0179	0.0061	0.067	0	0.0145			0.089	0.0104		0.0108	0.0066	0.0032		0.0076
UBR4	884	RI	78.2	78.1	78.3	0	0.9476	0.0901	0.005	0	0	0	0	0	0	0	0		0	0	0	0	0	0	0	0	0	0	0	0	0	0	0	0.0187	0	0		0	0				0		0	0	0		0
UBR4	885	ES	60	59	61	0	0.9721	0.2914	0.0424	0.9732	0.8965	0.9821	0.9704	1	1	0.8828	0.958		0.9492	0.9339	0.9255	0.9129	0.9807	0.972	0.8942	0.9359	0.951	0.9414	0.9155	0.9359	1	0.8965	0.9674	0.9856	0.7086	1	1	1	0.9193				0.9633	1	0.9743	1	1		0.9525
UBR4	886	ES	54	53	55	0	0.8953	0.6304	0.0814	0.1178	0.161	0.1631	0.1767	0.2456	0.2182	0.1457	0.0487		0.1966	0.1951	0.1157	0.2037	0.073	0.2904	0.1434	0.3385	0.082	0.1331	0.1275	0.1699		0.1417	0.1056	0.0697	0.1134	0.0851	0	0.0786	0.0601				0.1508	0.1457	0.0578	0	0.2423		0.1747
UBR4	887	ES	50	49	51	0	0.836	0.2878	0.0287	0.0237	0.1418	0	0	0.0678	0		0		0.041	0	0	0	0.0546	0.032	0		0	0.0134	0.0262	0		0	0.0833	0		0		0	0				0		0.0435	0	0.1791		0
EMC1	891	AA	10.1	9	10.2	0	0.9599	0.5084	0.081	0.8097	0.9263	0.9122	0.865	0.8713	0.7719	0.7132	0.8823		0.7343	0.8165	0.7261	0.7755	0.8073	0.8713	0.8227	0.8286	0.8503	0.8238	0.8735	0.7719		0.7027	0.7668	0.8341	0.853	0.6207	0.8969	0.888	0.9141			0.6853	0.8016	0.7632	0.9141	0.8131	0.7651	0.9312	0.6967
EMC1	893	ES	3	2.1	4	0	0.9948	0.1769	0.0153	1	1	0.9864	1	1	1	1	1		1	1	0.9763	1	1	1	1	1	1	0.9958	0.9757	0.9266	1	1	0.951	1	1	1	1	0.9799	1	1	1	0.906	0.987	1	1	1	0.986	1	1
EMC1	894	AD	2.2	2.1	3	0	0.986	0.5471	0.0412	0.0235	0	0.0061	0.0162	0	0.0431	0	0		0.0093	0.0235	0.0292	0.0383	0.0039	0.0247	0.0134	0.0727	0.0124	0.0167	0.0039	0.0334	0	0.0148	0.0295	0.0259	0.0369	0.0142	0.0211	0.0815	0		0.0476	0.2141	0.0028	0	0	0	0		0.0265
PQLC2	898	AA	4.1	3	4.2	0	0.9843	0.3807	0.0657	0.8419	0.916	0.9493	0.9776	0.9352	0.9708	0.9638	0.8293	0.8443	0.9327	0.8554	0.8859	0.7871	0.9344	0.916	0.8832	0.9367	0.8055	0.8714	0.893	0.9531	0.91	0.7473	0.8934	0.8829	0.9445	0.9708	0.9119	0.9024	0.7871	1	0.9225	1	0.8268	0.7952	0.9201	0.8554	0.8725	0.7912	0.9301
PQLC2	899	ES	2	1.3	3	0	1	0.2174	0.0286	0.9598	1	0.9614	0.9547	1	1	0.8951	0.9228	0.9524	0.975	1	1	0.9784	0.9645	0.9889	0.9813	1	0.973	0.9662	0.978	0.9645	0.9687	1	1	0.9852	1	1	1	0.9652	1	0.9645	1	0.8651	0.9359	0.967	0.951	0.9498	0.9045	1	0.9735
PQLC2	900	RI	1.2	1.1	1.3	0	0.9634	1	0.1406	0.3513	0.4858	0.2478	0.2282	0.5213	0.126	0.5138	0.319		0.3506	0.2776	0.3409	0.3657	0.2177	0.1668	0.2351	0.3904	0.169	0.3428	0.1559	0.1612	0.2351	0.1851	0.4021	0.3072	0.4466	0.2605	0.2516	0.2691	0.3904	0.3331	0.1154	0.2812	0.2343	0.2351	0.1514	0.4133	0.5736	0.4466	0.5105
CAPZB	901	AP	1			0	1	0.6194	0.0456	0.9858	0.991	0.9756	0.9888	0.9682	0.9711	0.9321	0.9921	0.9968	0.9638	0.9856	0.9893	0.9765	0.995	0.9899	0.9951	0.9972	0.9952	0.9906	0.9927	0.995	0.9701	0.9714	0.9909	0.9917	0.9424	0.991	1	0.9876	0.9665	0.9971	0.9937	0.9772	0.9949	0.9934	0.9973	0.9904	0.9951	0.9878	0.9804
CAPZB	902	AP	2			0	1	0.6194	0.0456	0.0142	0.009	0.0244	0.0112	0.0318	0.0289	0.0679	0.0079	0.0032	0.0362	0.0144	0.0107	0.0235	0.005	0.0101	0.0049	0.0028	0.0048	0.0094	0.0073	0.005	0.0299	0.0286	0.0091	0.0083	0.0576	0.009	0	0.0124	0.0335	0.0029	0.0063	0.0228	0.0051	0.0066	0.0027	0.0096	0.0049	0.0122	0.0196
CAPZB	903	AP	4.1			0	1	0	0	0	0	0	0	0	0	0	0	0	0	0	0	0	0	0	0	0	0	0	0	0	0	0	0	0	0	0	0	0	0	0	0	0	0	0	0	0	0	0	0
CAPZB	906	ES	11	10	12	0	1	0.1389	0.0171	0.0272	0.008	0.0279	0.0096	0.0083	0.0085	0.0197	0.0191	0.0085	0.0371	0.0259	0.0172	0.032	0.0269	0.0146	0.015	0.0113	0.0096	0.016	0.0069	0.0126	0.0094	0.0203	0.0209	0.0101	0.0209	0.0134	0.0208	0.0074	0.0151	0.0078	0.0061	0.0042	0.0406	0.005	0.0168	0.0042	0.0044	0.0074	0.0381
CAPZB	907	ES	10:11:00	9	12	0	0.9442	0.5129	0.0928	0.9467	1	1	0.8888	1	0.8553	0.8542	1	1	1	1	0.7616	1	0.9428	0.9272	1	1	1	0.9326	0.826	1	0.689	1	0.7733	0.8509	1	0.886	1	1	1	0.8751			1		0.9659		0.7169	1	1
CAPZB	908	ES	10	9	12	0	1	0.0078	0.0011	0.9989	1	1	0.9992	1	0.9991	0.9974	1	1	1	1	0.997	1	0.9992	0.9993	1	1	1	0.9994	0.9992	1	0.9979	1	0.9956	0.9991	1	0.999	1	1	1	0.9991	1	1	1	1	0.9996	1	0.9992	1	1
CAPZB	909	ES	3	1	4.2	0	1	0.6832	0.0576	0	0	0.0006	0.0005	0	0	0	0	0	0.0003	0	0	0.0004	0.0007	0	0	0	0.0008	0	0.0002	0	0	0	0.0012	0.0003	0	0	0.0029	0	0	0	0	0.0012	0.0006	0	0	0.0004	0.0003	0.0007	0.0008
NBL1	911	AP	1			0	0.9721	0.5724	0.0678	0.0303	0.0487	0.0297	0.0215	0	0.1081	0.0503	0	0	0.0439	0	0.0172	0.0517	0.0171	0.0754	0	0	0.0099	0.0175	0.0174	0	0	0.0972	0	0	0.0354	0	0.1479	0	0	0.1004	0	0	0.0413	0	0.0395	0	0	0	0.0162
NBL1	912	AP	2			0	0.9721	0.5724	0.0678	0.9697	0.9513	0.9703	0.9785	1	0.8919	0.9497	1	1	0.9561	1	0.9828	0.9483	0.9829	0.9246	1	1	0.9901	0.9825	0.9826	1	1	0.9028	1	1	0.9646	1	0.8521	1	1	0.8996	1	1	0.9587	1	0.9605	1	1	1	0.9838
TMCO4	913	AP	2			0	0.9791	0.9631	0.1345	0.408	0.3323	0.2718	0.2791	0.515	0.3323	0.6494	0.5206	1	0.4711	0.5898	0.4655	0.5879	0.3519	0.5206	0.2491	0.2373	0.4931	0.4958	0.3561	0.4988	0.2491	0.2491	0.2436	0.4433	0.3835	0.4909	0.3989	0.3739	0.3782	0.6656	0.125	0.4545	0.4906	0.5862	0.3531	0.5632	0.2098	0.699	0.3739
TMCO4	914	AP	1			0	0.9791	0.9631	0.1345	0.592	0.6677	0.7282	0.7209	0.485	0.6677	0.3506	0.4794	0	0.5289	0.4102	0.5345	0.4121	0.6481	0.4794	0.7509	0.7627	0.5069	0.5042	0.6439	0.5012	0.7509	0.7509	0.7564	0.5567	0.6165	0.5091	0.6011	0.6261	0.6218	0.3344	0.875	0.5455	0.5094	0.4138	0.6469	0.4368	0.7902	0.301	0.6261
TMCO4	915	RI	17.2	17.1	17.3	0	1	0.2651	0.0121	1	1	1	1	0.9734	1	1	1	0.9937	1	1	1	1	1	1	1	1	1	1	1	1	1	1	1	1	1	1	1	1	1	1	1	1	1	1	0.9953	1	1	1	1
TMCO4	916	ES	11	10	12	0	0.9895	0.3747	0.0467	0.898	1	0.9825	1	0.9621	1	1	0.9537	0.903	0.972	0.9424	0.9565	0.974	0.9782	1	0.971	1	0.9049	0.9854	0.9414	0.8423	1	1	0.8189	0.9684	0.8943	0.9092	0.9511	0.9178	0.9741	1	1	1	0.9484	0.7323	0.974	0.9877	0.9209	0.9068	0.9086
TMCO4	917	ES	3	1	4	1	0.8482	0.8405	0.141	0.18		0.4415	0.3562	0.5247	0.4868	0.5423	0.4731		0.7448	0.534	0.26	0.5948	0.6718	0.2833	0.192	0.4676	0.6448	0.6405	0.3623	0.2502	0.26	0.4893	0.4339	0.3844	0.6372	0.3759		0.5233	0.5685				0.5144	0.2787	0.452	0.703	0.497		0.5842
VWA5B1	923	AT	15			0	1	0.6866	0.0901	0.9465	1	0.875	0.9673	1	0.9865	1	1	0.9637	1	1	1	0.9571	0.9809	0.868	1	1	1	1	1	1	1	1	1	0.9449	1	0.972	0.9643	1	0.9181	1	1	1	1	1	1	1	1	1	1
VWA5B1	924	AT	24			0	1	0.4659	0.0624	0.0535	0	0.066	0.0327	0	0.0135	0	0	0.0363	0	0	0	0.0429	0.0191	0.0358	0	0	0	0	0	0	0	0	0	0.0551	0	0.028	0.0357	0	0.0819	0	0	0	0	0	0	0	0	0	0
VWA5B1	925	AT	20			0	1	0.3121	0.0409	0	0	0.0591	0	0	0	0	0	0	0	0	0	0	0	0.0962	0	0	0	0	0	0	0	0	0	0	0	0	0	0	0	0	0	0	0	0	0	0	0	0	0
DDOST	932	ES	2	1	3	0	1	0.0113	0.0013	1	1	0.9973	0.999	0.9989	1	1	0.999	1	1	1	1	0.9987	1	1	0.999	1	0.9994	1	0.9987	1	1	1	0.9987	1	1	1	1	0.9966	1	1	0.9979	0.9981	1	1	0.9993	0.9993	0.9992	1	0.9994
HP1BP3	936	AP	1			0	1	0.6947	0.1457	0.1824	0.1585	0.2836	0.1618	0.3213	0.0705	0.3911	0.0872	0	0.1313	0.1353	0.1343	0.1012	0.1625	0.2159	0.3608	0.2475	0.3179	0.249	0.1293	0.234	0.1083	0.1584	0.1614	0.199	0.0968	0.1097	0.1304	0.1563	0.2668	0	0	0.166	0.4813	0.2304	0.3811	0.4277	0.5413	0.242	0.209
HP1BP3	937	AP	7.1			0	1	0.7743	0.1674	0.7479	0.7832	0.6886	0.7914	0.5208	0.8862	0.5184	0.87	1	0.8364	0.8612	0.7943	0.805	0.7976	0.7046	0.5852	0.6309	0.5883	0.7051	0.8163	0.7419	0.8917	0.7405	0.7881	0.7311	0.8557	0.8442	0.8696	0.8346	0.6567	0.9729	0.856	0.8067	0.3635	0.6564	0.5628	0.5093	0.4334	0.758	0.7532
HP1BP3	938	AP	2			0	1	0.2693	0.0473	0.0697	0.0584	0.0279	0.0468	0.1578	0.0433	0.0904	0.0428	0	0.0323	0.0035	0.0715	0.0939	0.0399	0.0795	0.0539	0.1216	0.0937	0.0459	0.0544	0.0241	0	0.1011	0.0505	0.0698	0.0475	0.0462	0	0.009	0.0765	0.0271	0.144	0.0273	0.1552	0.1132	0.0562	0.063	0.0253	0	0.0378
HP1BP3	939	AT	6			0	1	0.4489	0.0469	0.064	0.1108	0.0689	0.0851	0.0524	0.0513	0.0192	0.0747	0.003	0.1058	0.1578	0.1702	0.0832	0.0858	0.0582	0.06	0.0356	0.0739	0.0904	0.0912	0.1214	0.0167	0.0557	0.0965	0.0825	0.0626	0.0641	0.0676	0.0726	0.0861	0.0254	0.0509	0.053	0.0357	0.036	0.0263	0.0268	0.0423	0.0261	0.1349
HP1BP3	940	AT	15			0	1	0.4489	0.0469	0.936	0.8892	0.9312	0.9149	0.9476	0.9487	0.9808	0.9253	0.997	0.8942	0.8422	0.8298	0.9168	0.9142	0.9418	0.94	0.9644	0.9261	0.9096	0.9088	0.8786	0.9833	0.9443	0.9035	0.9175	0.9374	0.9359	0.9324	0.9274	0.9139	0.9746	0.9491	0.947	0.9643	0.964	0.9737	0.9732	0.9577	0.9739	0.8651
EIF4G3	941	AP	1			0	0.808	0.4663	0.0309	1	1	1	1		1	1	1		1	1	1		1	1	1		1	1	1	1		1		1		1		1		1			1		1	1	1	1	1
EIF4G3	945	AP	3			0	0.808	0.4663	0.0309	0	0	0	0		0	0	0		0	0	0		0	0	0		0	0	0	0		0		0		0		0		0			0		0	0	0	0	0
EIF4G3	948	AT	42			0	1	0.1524	0.0167	1	1	1	1	1	1	1	0.9887	0.9876	1	1	0.9877	0.9917	1	1	1	1	0.9898	1	1	0.993	0.978	1	1	0.9893	0.9799	1	1	0.9938	1	1	0.9604	1	1	1	0.9948	1	1	1	1
EIF4G3	949	AT	18.2			0	1	0.1403	0.0149	0	0	0	0	0	0	0	0	0	0	0	0	0.0083	0	0	0	0	0	0	0	0.007	0.022	0	0	0.0107	0.011	0	0	0.0062	0	0	0.0217	0	0	0	0.0052	0	0	0	0
EIF4G3	950	AT	22.2			0	1	0.0679	0.0053	0	0	0	0	0	0	0	0.0113	0.0124	0	0	0.0123	0	0	0	0	0	0.0102	0	0	0	0	0	0	0	0.0091	0	0	0	0	0	0.0179	0	0	0	0	0	0	0	0
EIF4G3	951	ES	23	22.1	24	0	0.9913	0.6769	0.1011	0.4377	0.2491	0.2854	0.4732	0.3122	0.2973	0.3481	0.2139		0.3855	0.3239	0.3686	0.4659	0.3309	0.2	0.2219	0.5078	0.4267	0.5034	0.2976	0.3934	0.5195	0.3692	0.4154	0.267	0.4075	0.3168	0.4312	0.3547	0.5042		0.5109	0.4724	0.4226	0.5372	0.5451	0.3333	0.2329	0.3824	0.3432
EIF4G3	952	ES	18.1	17	19	0	0.9599	0.5139	0.0734	0.048	0.0424	0.0548	0.0391	0.0073	0.2068	0.3056	0.0213		0.1715	0.1153	0.2291	0.0416	0.1241	0.0088	0.0239	0.0466	0.026	0.0175	0.0683	0.0367	0	0.0863	0.0213	0.08	0.2922	0.0316	0.0554	0.1117	0.2928		0.5139		0.018	0	0	0.0303	0		0.0129
EIF4G3	954	ES	17	16.2	19	0	0.9965	0.1249	0.0106	1	0.9879	1	1	1	1	0.9788	1		1	1	0.9828	1	0.9866	1	1	1	1	1	0.9767	1	1	0.9802	1	1	1	1	1	1	1	1	1	1	0.9909	1	1	0.9809	0.9913	1	0.9857
EIF4G3	955	ES	16.1:16.2	15	17	0	0.9564	0.2017	0.033	1	0.9085	0.8895	1	1	1	1	1		1	1	0.9312	1	0.9834	1	0.9757	1	0.9804	0.9925	0.9597	1	1	1	1	1	1	1	1	1	1	1	1		0.9881	1	1	1	0.964		0.942
EIF4G3	956	ES	16.2	15	17	0	0.9651	0.2084	0.0305	1	0.9158	0.9189	1	1	1	1	1		1	1	0.9528	1	0.9832	1	0.9787	1	0.9798	0.9924	0.8765	1		1	1	1	1	1		1	1				0.9848	1	1	1	0.9812		0.9478
EIF4G3	957	AA	16.1	15	16.2	0	0.9319	0.9063	0.1136	0.45	0.4788	0.4168	0.44	0.2637	0.4204	0.4731	0.4129		0.4204	0.4085	0.4037	0.5407	0.5055	0.401	0.4689	0.3495	0.5089	0.5041	0.7719	0.2602		0.4916	0.4622	0.4293	0.4622	0.6218		0.2545	0.4916				0.5632	0.5473	0.3053	0.3993	0.3403		0.4731
EIF4G3	959	ES	11	9	12	0	0.7661	0.303	0.0167	0	0	0	0	0		0	0		0	0	0	0	0		0		0	0	0	0		0	0	0	0	0		0	0				0	0			0		0
EIF4G3	960	ES	10	9	12	0	0.8028	0.5669	0.0785	0.0902	0.0748	0.062	0.0941	0.1791		0.1234	0.1538		0	0	0.0462	0.055	0.0505		0.0691		0.053	0.0361	0.0748	0.1681		0	0.1081	0.1418	0.127	0.0335		0.3038	0.0833				0.2418	0	0.1951	0.0941	0.0984		0.1538
ECE1	961	AP	1			0	0.9878	0.9514	0.1529	0.4233	0.7988	0.4666	0.5506	0.4351	0.6447	0.5662	0.6499	0.7835	0.7927	0.6948	0.6031	0.7146	0.392	0.7661	0.5922	0.75	0.3488	0.6373	0.6429	0.5194	0.664	0.6981	0.5185	0.7836	0.4626	0.5084	0.5846	0.6113	0.805		0.5673	0.9514	0.5853	0.5864	0.5185	0.7008	0.5916	0.7013	0.6675
ECE1	962	AP	3.1			0	0.9878	0.5902	0.0581	0.0883	0.0788	0.1226	0.0849	0.1573	0.1558	0.2364	0.1269	0.1168	0.0834	0.0544	0.1581	0.0578	0.0819	0.0459	0.1028	0.0447	0.1156	0.0463	0.1195	0.0953	0.088	0.1633	0.1406	0.06	0.184	0.1483	0.1495	0.0324	0.0655		0.1127	0	0.0866	0.0538	0.0964	0.066	0.1064	0.0558	0.0468
ECE1	963	AP	2			0	0.9878	0.5721	0.0983	0.3931	0.0428	0.2178	0.2842	0.2415	0.0914	0.0816	0.1684	0.0997	0.0986	0.1565	0.2124	0.1233	0.3724	0.1062	0.2265	0.1431	0.3944	0.2228	0.1841	0.3456	0.1502	0.1114	0.2159	0.0658	0.1831	0.2759	0.1275	0.2212	0.0931		0.2886	0	0.2728	0.2601	0.2467	0.1314	0.2055	0.1189	0.0879
ECE1	964	AP	4.1			0	0.9878	0.7226	0.0876	0.0953	0.0796	0.193	0.0803	0.1661	0.1082	0.1157	0.0548	0	0.0252	0.0944	0.0264	0.1044	0.1537	0.0819	0.0785	0.0621	0.1413	0.0936	0.0535	0.0397	0.0978	0.0272	0.125	0.0905	0.1703	0.0674	0.1384	0.1351	0.0364		0.0314	0.0486	0.0554	0.0997	0.1384	0.1019	0.0965	0.124	0.1978
ECE1	965	ES	19	18	20	0	1	0.0273	0.0039	1	0.9961	0.9945	0.992	1	0.9955	1	0.9973	1	0.9962	1	0.9982	1	1	0.9984	1	0.9951	1	0.9985	0.9957	1	1	1	1	1	1	0.9957	1	0.9934	1	1	0.9824	1	0.9991	0.9936	0.9941	1	0.9971	1	1
NBPF3	966	AD	12.3	12.2	13	0	0.9529	0.7387	0.1275	0.8609	0.8609	0.8884	0.6798	0.9068	0.6238		0.7086		0.6112	0.6886	0.8313	0.7504	0.8068	0.7956	0.8468	0.4693	0.8795	0.8856	0.92	0.6123		0.6238	0.7148	1	0.6142	0.7849		0.6736	0.8077	1	0.4274	1	0.8565	0.95	0.7343	0.8242	0.5897	0.6655	0.7992
NBPF3	967	AA	12.1	11	12.2	0	0.9738	0.7117	0.1142	0.197	0.0586	0.1244	0.1641	0	0.2126	0	0.1879		0.1859	0.5673	0.1101	0.3834	0.2703	0.0614	0.1711	0.3816	0.0767	0.1308	0.0608	0.3103	0.1684	0.2037	0.2759	0.1011	0.5192	0.0858		0.2523	0.0975		0.0984	0.2466	0.087	0.0276	0.1525	0.0686	0.0632	0.1935	0.3932
NBPF3	968	ES	3:4:5:6	2	7	0	0.9983	0.1794	0.0199	0.9156	1	1	1	1	1	1	1	1	1	1	1	1	0.9777	1	1	1	1	0.9806	1	1	1	1	1	1	1	1	1	1	1	1	1	1	1	1	1	1	1	1	1
NBPF3	970	ES	03:04:05	2	6	0	0.9948	0.3737	0.0455	1	1	1	1	1	1	1	1	1	1	1	1	0.9655	0.9563	1	1	1	1	0.9294	1	1	1	0.7404	1	1	1	0.938	1	1	1	1	1	1	1	1	1	1	1	1	1
ALPL	972	AP	2			0	0.8709	0.7579	0.0676	0	0	0	0		0	0	0.0068	0	0	0	0	0.0102	0.0005	0	0	0	0	0.0128	0		0		0.0209	0	0	0	0		0	0			0	0	0.0082		0	0
ALPL	973	AP	9.1			0	0.8709	0	0	0	0	0	0		0	0	0	0	0	0	0	0	0	0	0	0	0	0	0		0		0	0	0	0	0		0	0			0	0	0		0	0
ALPL	974	AP	11			0	0.8709	0.7827	0.1146	0.0721	0.1748	0.01	0.2444		0.0832	0	0.0682	0.1924	0.1748	0.0797	0.276	0.2097	0.0464	0.0248	0.0314	0	0.0061	0.056	0.1065		0.4326		0.1776	0.0531	0.0895	0.0558	0		0	0.1056			0	0.0513	0.1609		0	0.1832
ALPL	975	AP	1			0	0.8709	0.8948	0.1413	0.9279	0.8252	0.99	0.7556		0.9168	1	0.925	0.8076	0.8252	0.9203	0.724	0.7801	0.9531	0.9752	0.9686	1	0.9939	0.9312	0.8935		0.5673		0.8015	0.9469	0.9105	0.9442	1		1	0.8944			1	0.9487	0.8309		1	0.8168
ALPL	976	ES	10	9.2	12	0	0.9843	0.0675	0.0043	1	1	1	1	1	1	1	0.9981	0.9904	1	1	1	1	1	1	1	1	1	1	1	1	1	1	0.9978	0.9992	1	1	1	1	1	1	1		1	0.9944	1	0.9325	0.9821	1
ALPL	977	ES	5	4	6	0	0.9651	0.0512	0.0053	0.9977	1	0.9941	1	1	1	1	0.9962	1	1	1	1	1	0.9996	0.9974	0.9965	1	0.9936	1	1		1	1	0.9971	1	1	1	1	1	1	1	1		1	1	1	1	1	1
ALPL	978	ES	3	1	4	0	0.9442	0.3006	0.0326	0.9849	1	0.9782	1	1	1	1	1	0.9241	1	1	1	0.9742	0.9667	0.972	0.9676	1	0.9823	1	1		1		0.9849	0.9981	0.9948	1	1	1	1	0.9722	1		0.9904	0.9874	0.9888	1	1	0.8553
RAP1GAP	980	AP	1			0	0.7609	0.8571	0.1259	0	0.488	0.0812	0	0	0	0.0287	0.641		0.424	0.3236	0	0	0.2269	0.0701	0.0766	0.0607	0.1165		0.2469			0.0761	0.3053	0.1467			0	0					0.2355	0	0.2259	0			0
RAP1GAP	981	AP	3			0	0.7609	0.7469	0.1342	0.1232	0.4814	0.4556	0.1272	0.0895	0.3296	0	0.1581		0	0.0113	0.7109	0.3155	0.2183	0.2437	0.1586	0.0487	0.1868		0.099			0.4273	0.1224	0.2353			0.1314	0.2561					0.1888	0.0703	0.3065	0.4245			0.1794
RAP1GAP	982	AP	6			0	0.7609	0.9694	0.1709	0.8768	0.0306	0.4632	0.8728	0.9105	0.6704	0.9713	0.2009		0.576	0.6651	0.2891	0.6845	0.5548	0.6862	0.7648	0.8906	0.6966		0.6541			0.4966	0.5723	0.618			0.8686	0.7439					0.5758	0.9297	0.4675	0.5755			0.8206
RAP1GAP	983	AA	26.1:26.2	25.2	26.3	0	0.8935	0.7273	0.1074	0.5965	0.6001	0.5765	0.71	0.7472	0.5422	0.3779	0.6522	0.5746	0.498	0.591	0.8424	0.6635	0.694	0.6185	0.751	0.8055	0.7124	0.544	0.7417	0.5867	0.7149	0.7872	0.7109	0.581	0.7972	0.5491	0.7177	0.6187	0.8633	0.7953	0.7977	0.7631	0.5531	0.5507	0.657	0.7072		0.6873	0.6537
RAP1GAP	984	AA	26.2	25.2	26.3	0	0.9668	0.4663	0.0525	0.8855	0.8013	0.8115	0.9143	0.89	0.8378	0.7697	0.8875	0.8119	0.8015	0.8473	0.917	0.8905	0.8882	0.9	0.9151	0.9382	0.8901	0.7686	0.8521	0.8611	0.8526	0.9232	0.859	0.8506	0.9431	0.8465	0.8448	0.8436	0.9364	0.9203	0.8783	0.9312	0.8185	0.8371	0.8687	0.8805		0.9143	0.8864
RAP1GAP	985	AA	26.1	25.2	26.2	0	0.9581	0.4702	0.0642	0.1588	0.2739	0.2395	0.1835	0.2674	0.1846	0.1512	0.1936	0.2379	0.1978	0.2076	0.325	0.1954	0.2241	0.1535	0.2211	0.2165	0.2351	0.2604	0.337	0.1831	0.3017	0.2372	0.2881	0.1945	0.1886	0.1786	0.3186	0.2304	0.3161	0.2516	0.3581	0.1879	0.2171	0.1933	0.2226	0.2467		0.1704	0.1914
RAP1GAP	986	AA	25.1	24	25.2	0	0.9808	0.0156	0.0007	1	1	1	1	1	1	1	1	1	1	1	1	1	1	1	1	1	1	1	1	1	1	1	1	1	1	1	0.9935	1	1	1	1	1	1	1	1	1	1	1	1
RAP1GAP	987	RI	22.3	22.2	22.4	0	0.7888	0.6218	0.0867	1	1	1	1	1	0.9684	1	1	1	1	0.9695	1	1	1	1	1	1	1	1	0.8088	1	1	1	1	1	1	1	1	0.8008		1	1	1		1	1			1	0.7333
RAP1GAP	988	RI	22.2:22.3	22.1	22.4	0	0.8342	0.9757	0.2607	0.6254	0.9141	0.5498	0.83	1	0.7796	0.3435	1	0.8318	1	0.6712	0.8593	0.9313	0.6209	0.7107	0.4784	0.5189	0.3435	0.6673	0.8104	1	0.8481	0.7407	0.6991	0.6673	0.4209	0.5668	0.8093	0.8821		0.3037	1	1		0.3791	0.5635			0.7682	0.5626
RAP1GAP	990	AA	22.1:22.2:22.3	21	22.4	0	0.9634	0.4305	0.068	0.1343	0.1345	0.0675	0.1518	0.019	0.4305	0.0026	0.0552	0.3006	0.078	0.1208	0.1498	0.1897	0.1402	0.0686	0.0558	0.119	0.0205	0.0893	0.0699	0.0216	0.0756	0.0944	0.1459	0.1185	0.0989	0.1309	0.1425	0.0597	0.0061	0.0355	0.1764	0.0667	0	0.0231	0.0117	0.0067		0.0676	0.0829
RAP1GAP	991	ES	22.1:22.2	21	22.4	0	0.9424	0.1839	0.0161	0	0	0	0	0.0036	0.0385	0.0007	0	0	0	0.0078	0	0	0	0	0	0	0	0	0.0234	0	0	0	0	0	0	0	0	0.0143	0.0083	0	0.1839	0	0	0	0	0.0053		0	0.0468
RAP1GAP	992	ES	22.1	21	22.4	0	0.9476	0.3838	0.0593	0.1037	0.0269	0.071	0.0532	0.0074	0.2308	0.0028	0	0.1062	0	0.0926	0.0302	0.0205	0.0867	0.0356	0.0663	0.114	0.0436	0.1224	0.0249	0	0.0184	0.0454	0.0932	0.0861	0.1278	0.1394	0.0471	0.0101	0.0114	0.046	0	0.03	0	0.0556	0.0108	0.0109		0.0182	0.0839
USP48	994	AP	12.1			0	1	0.8921	0.1924	0.5855	0.4028	0.6422	0.6651	0.6029	0.7398	0.4474	0.7006	0.9278	0.7226	0.776	0.7636	0.7657	0.7267	0.6203	0.4077	0.6582	0.4133	0.3862	0.5184	0.8727	0.8691	0.8653	0.8154	0.6	0.8029	0.7795	0.8561	0.7682	0.7297	0.7808	0.8136	0.7741	0.1879	0.3674	0.7348	0.2881	0.1113	0.6574	0.7573
USP48	995	AP	1			0	1	0.8921	0.1924	0.4145	0.5972	0.3578	0.3349	0.3971	0.2602	0.5526	0.2994	0.0722	0.2774	0.224	0.2364	0.2343	0.2733	0.3797	0.5923	0.3418	0.5867	0.6138	0.4816	0.1273	0.1309	0.1347	0.1846	0.4	0.1971	0.2205	0.1439	0.2318	0.2702	0.2192	0.1864	0.2259	0.8121	0.6326	0.2652	0.7119	0.8887	0.3426	0.2427
USP48	996	AT	27			0	1	0.7148	0.1024	0.674	0.4977	0.6077	0.6444	0.443	0.6013	0.8505	0.7328	0.7475	0.4984	0.4585	0.5029	0.6856	0.6438	0.6542	0.6992	0.6464	0.538	0.4855	0.607	0.3961	0.7472	0.5627	0.6268	0.6392	0.6867	0.6592	0.6241	0.7246	0.71	0.6638	0.6023	0.4038	0.6302	0.5096	0.5708	0.473	0.7894	0.595	0.4723
USP48	997	AT	11.2			0	1	0.7148	0.1024	0.326	0.5023	0.3923	0.3556	0.557	0.3987	0.1495	0.2672	0.2525	0.5016	0.5415	0.4971	0.3144	0.3562	0.3458	0.3008	0.3536	0.462	0.5145	0.393	0.6039	0.2528	0.4373	0.3732	0.3608	0.3133	0.3408	0.3759	0.2754	0.29	0.3362	0.3977	0.5962	0.3698	0.4904	0.4292	0.527	0.2106	0.405	0.5277
USP48	998	ES	23	22	24	0	1	0.1303	0.0176	1	0.9812	0.9691	0.9749	0.9656	0.97	1	0.972	0.9704	0.9793	0.8811	0.9747	1	0.9961	0.9904	0.979	1	0.9808	0.9956	0.9924	0.9788	0.9763	0.9821	0.9757	0.9751	0.9693	0.9816	0.9893	0.983	0.988	0.9443	1	0.9714	0.9963	0.9443	0.962	0.9584	0.9876	0.9893	0.9743
USP48	999	AA	16.1	15	16.2	0	0.9948	0.4711	0.0364	0	0	0.0166	0	0	0	0	0	0	0.0116	0	0.0085	0	0.0166	0.0105	0.0101	0	0	0.0061	0	0	0	0	0	0.0081	0	0	0	0	0.0292	0	0	0	0	0	0.0181	0	0	0	0.0118
USP48	1000	AA	14.1	13	14.2	0	0.9948	0.5084	0.0804	0.7335	0.8855	0.7986	0.7645	0.7719	0.8165	0.6091	0.6462		0.6338	1	0.8364	0.853	0.7545	0.7255	0.6273	0.7946	0.7677	0.6723	0.7437	0.7586	0.8457	0.8376	0.7281	0.7979	0.7036	0.7046	0.7632	0.5125	0.7719	0.5473	1	0.8133	0.6345	0.8713	0.817	0.868	0.8131	0.5632	0.7982
USP48	1001	AA	10.1	9	10.2	0	0.9983	0.3829	0.0577	0.8286	0.8376	0.8927	0.8693	0.8218	0.8645	0.7838	0.7437	0.7719	0.8596	0.7996	0.7586	0.8927	0.7658	0.8871	0.9054	0.9457	0.7971	0.8489	0.7911	0.7088	0.7538	0.8131	0.7975	0.9037	0.7287	0.9096	0.7206	0.7632	0.7838	0.8627	0.9019	0.765	0.8561	0.941	0.8662	0.8223	0.8427	0.7719	0.8575
LDLRAD2	1002	RI	5.2	5.1	5.3	0	1	0.1163	0.006	1	1	1	1	1	1	1	1	1	1	1	1	1	1	1	1	1	1	1	1	1	1	1	1	1	1	1	1	1	1	1	1	1	1	1	1	1	1	1	1
CDC42	1003	AT	8			0	1	0.0745	0.0073	0.0069	0.0091	0.0068	0.0146	0.007	0.0108	0.0091	0.0067	0.0031	0.0134	0.0219	0.0102	0.0111	0.0088	0.0057	0.0092	0.0059	0.0047	0.0143	0.0094	0.0056	0.0072	0.0067	0.0136	0.0076	0.0113	0.01	0.0129	0.011	0.0041	0.0029	0.0052	0.0027	0.0095	0.0032	0.0035	0.0115	0.0047	0.0022	0.0253
CDC42	1004	AT	9			0	1	0.0745	0.0073	0.9931	0.9909	0.9932	0.9854	0.993	0.9892	0.9909	0.9934	0.9969	0.9866	0.9781	0.9898	0.9889	0.9912	0.9943	0.9908	0.9941	0.9953	0.9857	0.9906	0.9944	0.9928	0.9933	0.9864	0.9924	0.9887	0.9901	0.9871	0.989	0.9959	0.9971	0.9948	0.9973	0.9905	0.9968	0.9965	0.9885	0.9953	0.9978	0.9747
CDC42	1005	ES	4	3	5	0	1	0.1115	0.009	0.0025	0.0009	0.0062	0.0109	0.0036	0.0046	0.0024	0.0076	0.018	0.0035	0.0142	0.009	0.0066	0.0038	0.0085	0.0029	0	0.0014	0.005	0.0069	0.0097	0.0085	0.0119	0.0099	0.0065	0	0.0063	0.0021	0.012	0.0106	0.0039	0	0.0023	0.0024	0.0146	0.0074	0.01	0.0012	0.012	0.0051
CDC42	1006	ES	2	1	3	0	1	0.2453	0.0306	0.0838	0.0562	0.0873	0.0887	0.0619	0.0733	0.0971	0.088	0.0827	0.0552	0.1137	0.0841	0.1138	0.1033	0.0769	0.074	0.0925	0.0922	0.0699	0.0679	0.0482	0.0872	0.0851	0.0629	0.0978	0.1041	0.0625	0.0878	0.0563	0.1167	0.0656	0.0572	0.0521	0.0816	0.063	0.0661	0.1038	0.0633	0.0812	0.0944
ZBTB40	1009	ES	05:06:00	4	7	0	0.9843	0.2431	0.0264	1	0.8866	1	1	1	0.879	1	1		0.9517	1	1	1	1	1	0.9721	1	1	1	1	1	1	1	1	0.9577	1	1	1	1	1			1	1	1	0.9411	1	1	1	0.9614
C1QA	1011	AP	1			0	0.9948	0.3028	0.0232	0.9778	0.9831	0.9846	0.9873	0.9506	0.984	0.9916	0.9652	1	0.979	0.876	0.9713	1	0.9703	0.965	0.9567	0.9759	0.9787	0.9906	0.9869	1	1	0.9787	0.9749	0.9795	0.9837	0.9719	1	1	1	0.9797	0.9654	1	0.9823	1	0.9898	0.9757	0.9728	0.945	0.9365
C1QA	1012	AP	2.1			0	0.9948	0.3028	0.0232	0.0222	0.0169	0.0154	0.0127	0.0494	0.016	0.0084	0.0348	0	0.021	0.124	0.0287	0	0.0297	0.035	0.0433	0.0241	0.0213	0.0094	0.0131	0	0	0.0213	0.0251	0.0205	0.0163	0.0281	0	0	0	0.0203	0.0346	0	0.0177	0	0.0102	0.0243	0.0272	0.055	0.0635
C1QC	1014	AD	1.3	1.2	2	0	0.9407	0.7222	0.0922	0.2444	0.1982	0.2441	0.3014	0.1984	0.2582	0.2582	0.2361		0.1764		0.1721	0.3447	0.2481	0.223	0.2592	0.0737	0.2325	0.1462	0.2404		0.29	0.233	0.2347	0.231	0.175	0.2031	0.317		0.3809	0.2723			0.1998	0.2937	0.2463	0.2708	0.3334	0.2196	0.0691
C1QC	1019	AD	1.2:1.3	1.1	2	0	0.9948	0.1152	0.0137	0.0278	0.0222	0.0226	0.0486	0.0295	0.0299	0.043	0.0347	0.0048	0.0205	0.029	0.0192	0.0311	0.0257	0.0179	0.0194	0.0062	0.0217	0.0174	0.029	0	0.0558	0.0298	0.0251	0.026	0.0222	0.0228	0.0207	0.0813	0.0533	0.0377	0.0288	0.0278	0.0217	0.0288	0.0327	0.0274	0.0355	0.0268	0.0129
C1QC	1020	AD	1.2	1.1	2	0	0.9948	0.1643	0.0198	0.0929	0.0982	0.0801	0.1022	0.1154	0.0855	0.1328	0.1018	0.0831	0.1044	0.1227	0.0917	0.0775	0.0799	0.0661	0.0684	0.0684	0.0761	0.0987	0.0966	0	0.1406	0.0984	0.0871	0.091	0.1098	0.0915	0.0552	0.0431	0.0874	0.0932	0.0135	0.0622	0.0846	0.0762	0.0943	0.062	0.0757	0.0866	0.1547
EPHB2	1023	AT	8			0	1	0.1887	0.0172	0	0	0	0	0	0	0	0	0	0.0012	0	0	0	0	0	0	0	0	0	0	0	0	0	0	0	0	0	0	0	0	0	0	0	0	0	0	0	0.0017	0	0
EPHB2	1024	AT	17.5			0	1	0.1887	0.0172	1	1	1	1	1	1	1	1	1	0.9988	1	1	1	1	1	1	1	1	1	1	1	1	1	1	1	1	1	1	1	1	1	1	1	1	1	1	1	0.9983	1	1
EPHB2	1025	RI	17.4	17.3	17.5	0	0.9511	0.186	0.02	1	1	0.973	1	1	1	0.9922	1	1	1	1	1	1	1	1	1		1	1	0.9775	1	1	0.988	1	1	1	1	1	1	1	1		1	1	1	0.9804	1	0.9922	1	1
EPHB2	1026	RI	17.2	17.1	17.3	0	0.9983	0.9802	0.1789	0.2368	0.4029	0.1777	0.1473	0.1023	0.2592	0.1946	0.1316	0.4891	0.0736	0.7608	0.2501	0.5842	0.1774	0.1137	0.161	0.4547	0.188	0.4081	0.1214	0.3722	0.2988	0.0942	0.3758	0.1826	0.5971	0.1608	0.2896	0.5895	0.3404	0.0957	0.3619	0.2396	0.0325	0.1693	0.1933	0.1526	0.0231	0.1259	0.1627
KDM1A	1030	ES	11	9	12	0	1	0.0205	0.0022	0	0.008	0	0	0	0.017	0	0	0	0	0	0	0.0072	0	0	0	0	0	0	0	0	0	0	0	0	0	0	0	0	0	0	0	0	0	0	0	0	0	0	0
KDM1A	1031	ES	10	9	12	0	1	0.0102	0.0007	0	0	0	0	0	0	0	0	0	0	0	0	0.0072	0	0	0	0	0	0	0	0	0	0	0	0	0	0	0	0	0	0	0	0	0	0	0	0	0	0	0
KDM1A	1032	ES	3	2	4	0	0.9948	0.7708	0.0956	0.6496	0.5854	0.8348	0.7204	0.6937	0.5723	0.5368	0.6577	0.6408	0.5052	0.6003	0.5844	0.7611	0.7365	0.6969	0.7257	0.8426	0.6333	0.5263	0.7416	0.55	0.4096	0.731	0.7737	0.6964	0.6754	0.7857	0.8928	0.4672	0.5843	0.8928		0.6635	0.6973	0.7673	0.6662	0.5924	0.684	0.8117	0.6504
LUZP1	1036	AT	5			0	1	0.2194	0.0187	0	0.014	0	0	0	0.0048	0	0	0	0.018	0.0119	0.0222	0.0048	0.0097	0.0152	0.0041	0	0.0089	0.0045	0	0.0086	0	0.0206	0.0046	0.0084	0	0	0	0.0131	0.0078	0	0	0	0	0.024	0	0	0	0	0
LUZP1	1037	AT	6			0	1	0.2194	0.0187	1	0.986	1	1	1	0.9952	1	1	1	0.982	0.9881	0.9778	0.9952	0.9903	0.9848	0.9959	1	0.9911	0.9955	1	0.9914	1	0.9794	0.9954	0.9916	1	1	1	0.9869	0.9922	1	1	1	1	0.976	1	1	1	1	1
LUZP1	1039	ES	3.2	2	4	0	0.7976	0.1968	0.0199	1		1	0.8367	1	1	1	1		1	1	1	1	1	1	1	1	1	1	1	1				1		1		0.8032					1	1	1	1	1		1
HTR1D	1041	AT	2			0	0.9284	0.0697	0.0036	0	0	0	0	0	0	0	0	0	0	0	0	0	0	0	0	0	0	0	0	0	0	0	0	0	0	0	0	0	0	0	0	0	0		0	0	0	0	0
HTR1D	1042	AT	1.2			0	0.9284	0.0697	0.0036	1	1	1	1	1	1	1	1	1	1	1	1	1	1	1	1	1	1	1	1	1	1	1	1	1	1	1	1	1	1	1	1	1	1		1	1	1	1	1
HNRNPR	1043	AA	8.1	7	8.2	0	0.9983	0.3504	0.0461	0.2558	0.0983	0.1215	0.1471	0.2493	0.152	0.0859	0.1225	0.1225	0.1036	0.1661	0.0963	0.2154	0.1221	0.0979	0.1899	0.1628	0.1713	0.1112	0.149	0.0552	0.0456	0.1548	0.1703	0.1702	0.1892	0.1678	0.1596	0.123	0.161	0.2873	0.086	0.1316	0.1133	0.1133	0.1281	0.0886	0.1249	0.1428	0.0767
HNRNPR	1044	ES	6	5	7	0	1	0.1034	0.0125	0.9883	0.9829	0.9911	0.9925	0.9896	0.9708	1	0.9574	1	0.9874	0.9778	0.9893	0.9857	0.9932	0.9947	0.9893	0.9792	0.9851	0.987	0.9782	0.983	1	0.994	0.988	0.9885	0.9716	0.9865	0.9782	0.9831	0.922	0.9715	1	0.9033	0.9915	0.9907	1	0.9806	0.9866	1	0.9828
HNRNPR	1046	ES	5	4	6	0	1	0.3546	0.0247	0.9673	0.9477	0.9557	0.9604	0.9887	0.9673	1	0.9886	1	0.9562	0.9324	0.9472	0.9932	0.9684	0.941	0.9896	0.9521	0.972	0.9695	0.9726	0.9841	1	0.9258	0.9938	0.9594	0.9812	0.986	0.9469	0.9534	0.9475	0.8741	0.9757	0.9575	0.9737	0.9575	0.9669	0.9456	0.9786	0.9847	0.9737
HNRNPR	1047	AA	2.1	1	2.2	0	0.9494	0.8186	0.1059	0.6592	0.3438	0.3386	0.5558	0.1947	0.6851	0.226	0.2165		0.4204	0.6007	0.2646	0.4532	0.3607	0.5752	0.4251		0.4996	0.3593	0.4336	0.2872		0.4716	0.3731	0.44	0.6394	0.5708	0.3259	0.4129	0.2661			0.7207	0.3958	0.4622	0.3153	0.2648	0.3974	0.7719	0.3607
HNRNPR	1048	ES	2.1:2.2	1	3	0	0.9983	0.669	0.0862	0.4024	0.1484	0.198	0.38	0.2807	0.4445	0.3356	0.1673	0.2546	0.2665	0.3342	0.2284	0.1974	0.2026	0.4449	0.2947	0.2541	0.3547	0.2512	0.2568	0.345	0.2247	0.2511	0.307	0.3726	0.432	0.4172	0.4297	0.2731	0.3489	0.2578	0.341	0.4044	0.2858	0.4272	0.2872	0.2858	0.3361	0.4277	0.3197
HNRNPR	1049	ES	2.2	1	3	0	0.9983	0.894	0.0932	0.2595	0.2508	0.327	0.3301	0.6197	0.2705	0.6347	0.4218	0.2578	0.3354	0.2513	0.4532	0.2303	0.3119	0.3734	0.363	0.3477	0.3566	0.3759	0.3123	0.5686	0.2328	0.2741	0.4284	0.4328	0.3018	0.3515	0.6099	0.3498	0.5985	0.4194	0.1523	0.209	0.3808	0.4667	0.4686	0.5278	0.4358	0.1818	0.456
ZNF436	1050	AP	1			0	0.911	1	0.1759	0.4669	0.2009	0.5277	0.4013	0.819	0.4945	0.8445	0.6679		0.5783	0.4852	0.5252	0.5014	0.5371	0.3474	0.4013		0.512	0.6257	0.4482	0.2658		0.6679	0.3346	0.4559	0.7787	0.4458		0.1077	0.6679				0.4013		0.4852	0.4879	0.4786	0.707	0.4299
ZNF436	1051	AP	2.1			0	0.911	1	0.1759	0.5331	0.7991	0.4723	0.5987	0.181	0.5055	0.1555	0.3321		0.4217	0.5148	0.4748	0.4986	0.4629	0.6526	0.5987		0.488	0.3743	0.5518	0.7342		0.3321	0.6654	0.5441	0.2213	0.5542		0.8923	0.3321				0.5987		0.5148	0.5121	0.5214	0.293	0.5701
C1orf213	1054	RI	1.5	1.4	1.6	0	0.8325	0.7692	0.1633	0.8182	0.854	1	0.8587	1	1	1	1	1	1	1	1	1	1	0.6813	1	1	0.8182	0.9227	0.8254	1	1	1	0.863	1	0.802	0.7298		1	1		1	1	1		1	0.5531	0.4031	0.5919	0.802
C1orf213	1055	RI	1.3	1.2	1.4	0	1	0.7355	0.1344	0.8423	0.7791	0.8845	1	1	0.8868	1	0.8222	0.735	1	1	1	0.7836	0.8978	0.8542	1	0.6143	1	0.8411	0.6816	0.9341	1	0.7906	0.7812	0.8604	1	0.8343	0.7276	1	1	1	1	1	0.8772	1	0.7332	0.6025	1	0.8536	0.8794
C1orf213	1056	RI	1.2:1.3	1.1	1.4	0	1	0.8277	0.1369	0.8422	0.8345	0.7267	0.9046	1	0.9384	1	1	1	1	1	0.9055	0.8714	1	0.7466	1	1	0.837	1	1	1	1	1	1	1	1	0.9088	1	1	1	1	1	0.7969	0.8792	1	1	0.5981	1	0.856	0.8861
TCEA3	1058	AP	1			0	1	1	0.0916	0.935	0.9524	0.9253	0.9261	0.9806	0.8881	0.9671	0.9792	0.9399	0.9563	0.8498	0.816	0.8397	0.8766	0.9478	0.9594	0.9362	0.9769	0.9611	1	0.9147	0.9295	0.9551	0.8458	0.9463	0.8733	0.9157	0.808	1	0.9435	0.9919	0.9717	1	0.9893	0.9833	0.9316	0.9014	1	0.9859	0.8529
TCEA3	1059	AP	2.1			0	1	1	0.0916	0.065	0.0476	0.0747	0.0739	0.0194	0.1119	0.0329	0.0208	0.0601	0.0437	0.1502	0.184	0.1603	0.1234	0.0522	0.0406	0.0638	0.0231	0.0389	0	0.0853	0.0705	0.0449	0.1542	0.0537	0.1267	0.0843	0.192	0	0.0565	0.0081	0.0283	0	0.0107	0.0167	0.0684	0.0986	0	0.0141	0.1471
TCEA3	1060	AT	6			0	0.9983	0.3875	0.0301	0.0178	0.0238	0.0238	0.0066	0.0087	0.0108	0.0017	0.0152	0.004	0.0431	0.0396	0.0289	0.0053	0.02	0.0062	0.013	0.0134	0.0171	0.0094	0	0.0016	0.0106	0.0027	0.0068	0.01	0.0213	0.0107	0.0166	0.0496	0.0146	0.0013	0.0175	0	0.0052	0.0165	0.0034	0.0068	0.0501	0.0075	0.0352
TCEA3	1061	AT	12			0	0.9983	0.3875	0.0301	0.9822	0.9762	0.9762	0.9934	0.9913	0.9892	0.9983	0.9848	0.996	0.9569	0.9604	0.9711	0.9947	0.98	0.9938	0.987	0.9866	0.9829	0.9906	1	0.9984	0.9894	0.9973	0.9932	0.99	0.9787	0.9893	0.9834	0.9504	0.9854	0.9987	0.9825	1	0.9948	0.9835	0.9966	0.9932	0.9499	0.9925	0.9648
ASAP3	1066	AD	21.2	21.1	22	0	0.8796	0.5382	0.085	0.1793	0.2798	0.2358	0.387	0.0769	0.1044	0.189	0.1863		0.3269	0.0374	0.0974	0.134	0.189	0.1119	0.1793	0.1694	0.1793	0.171		0.2364	0.0247	0.0526	0.0414	0.0526	0.1093	0.1793	0.2057			0.2256			0.0922		0.1242	0.1147		0.1272	0.0608
PITHD1	1068	AP	1			0	0.9983	0.4626	0.0477	0.9787	0.9706	0.962	0.9309	0.9846	0.9426	1	1	1	0.9	0.8691	0.8859	0.9696	0.9731	1	0.9791	1	1	0.948	0.9679	0.9016	0.975	0.9831	0.9501	0.9817	0.94	0.9436	0.9684	0.9842	0.9331	0.907	1	1	0.9743	1	0.9716	1	1	0.9771	0.8492
PITHD1	1069	AP	4			0	0.9983	0.4626	0.0477	0.0213	0.0294	0.038	0.0691	0.0154	0.0574	0	0	0	0.1	0.1309	0.1141	0.0304	0.0269	0	0.0209	0	0	0.052	0.0321	0.0984	0.025	0.0169	0.0499	0.0183	0.06	0.0564	0.0316	0.0158	0.0669	0.093	0	0	0.0257	0	0.0284	0	0	0.0229	0.1508
LYPLA2	1070	AP	1			0	0.9948	0.6297	0.097	0.9336	0.9341	0.9028	0.9308	0.9846	0.9394	0.9254	0.9793	0.6548	0.8951	0.8848	0.871	0.8974	0.929	0.949	0.9534	0.9788	0.9676	0.9776	0.9529	0.9836	1	0.924	0.8701	0.8921	0.8896	0.9295	0.8741	1	0.9078	0.9822	0.9404	1	0.9851	1	0.8997	0.9545	1	0.9864	0.898
LYPLA2	1071	AP	5.1			0	0.9948	0.6297	0.097	0.0664	0.0659	0.0972	0.0692	0.0154	0.0606	0.0746	0.0207	0.3452	0.1049	0.1152	0.129	0.1026	0.071	0.051	0.0466	0.0212	0.0324	0.0224	0.0471	0.0164	0	0.076	0.1299	0.1079	0.1104	0.0705	0.1259	0	0.0922	0.0178	0.0596	0	0.0149	0	0.1003	0.0455	0	0.0136	0.102
LYPLA2	1072	RI	8.5	8.4	8.6	0	1	0.3424	0.0431	0.0486	0.1221	0.0677	0.0719	0.0274	0.1	0.0611	0.0928	0.0598	0.1119	0.0692	0.1686	0.1088	0.0908	0.0467	0.047	0.0445	0.0318	0.0641	0.0836	0.1026	0.0723	0.0791	0.1074	0.0676	0.1199	0.0824	0.097	0.1186	0.0777	0.0403	0.1102	0.0917	0.0458	0.0315	0.0275	0.1792	0.0114	0.0359	0.1507
LYPLA2	1073	RI	8.2:8.3	8.1	8.4	0	0.9843	0.9185	0.1511	0.7695	0.7768	0.6522	0.7374	0.0815	0.9704	0.9118	0.8722	0.6558	0.8719	0.7933	0.8868	0.8233	0.883	0.7199	0.718	0.7394	0.5301	0.6216	0.7648	0.4082	0.5726	0.8126	0.8544	0.8588	0.7265	0.7425	0.9459	0.9354	0.5848	0.5966	0.8092	0.6227	0.632	0.3863	0.5416	0.9306	0.7846	0.5308	0.7417
LYPLA2	1074	AA	8.3	8.1	8.4	0	0.9983	0.0584	0.01	0.9785	0.9679	0.9516	0.9824	0.9799	0.9969	0.9935	0.9864	0.9774	0.9877	0.9774	0.9761	0.9844	0.9926	0.9721	0.9749	0.9812	0.9724	0.9671	0.9689	0.9599	0.9593	0.9857	0.9833	0.9897	0.9851	0.977	0.9898	0.9917	0.9551	0.9715	0.9834	0.9715	0.9883	0.965	0.9813	0.9901	0.9905	0.9787	0.975
LYPLA2	1075	RI	8.2	8.1	8.3	0	0.993	0.4822	0.0427	0.0792	0.121	0.1004	0.0555	0.0022	0.1084	0.0713	0.0997	0.0492	0.089	0.0938	0.1802	0.0794	0.0622	0.0799	0.072	0.0591	0.0364	0.0608	0.1082	0.0313	0.0636	0.0699	0.1035	0.0685	0.0462	0.0749	0.1769	0.1255	0.0703	0.0486	0.0746	0.0538	0.0225	0.0267	0.0259	0.1344	0.0388	0.0277	0.079
LYPLA2	1076	ES	7	6	8.1	0	1	0.02	0.0015	1	1	0.9914	1	1	1	1	1	1	1	1	1	1	1	1	1	1	1	1	1	1	1	1	1	1	1	1	1	0.9977	1	1	1	1	1	1	1	1	1	1	1
GALE	1077	ES	3	2	4	1	0.9791	0.3557	0.0582	0.9288	0.8786	0.9392	0.9238	0.962	0.935	0.764	0.8541	0.8564	0.8567	0.9026	0.8008	0.9139	0.9494	0.9022	0.9433	0.8777	0.9403	0.9083	0.8791	0.78	0.878	0.908	0.8798	0.9151	0.8439	0.8947	0.83	0.7816	0.9269	0.875	0.88	0.8093	0.7662	0.8685	0.9095	0.8311	0.8776	0.8685	0.8561
HMGCL	1078	AP	1			0	0.9983	0.3715	0.0405	0.0042	0.0165	0.0055	0.0069	0.0056	0	0.062	0.0113	0.0129	0.013	0.0089	0.0107	0.0356	0.0053	0.0539	0.0047	0.0137	0.0165	0.1273	0.0114	0.0148	0	0.0045	0.0072	0.0016	0.0036	0.01	0.0634	0.0319	0	0.0139	0.1011	0.0598	0.024	0.0051	0.0396	0.0058	0	0.006	0.0648
HMGCL	1079	AP	3			0	0.9983	0.3715	0.0405	0.9958	0.9835	0.9945	0.9931	0.9944	1	0.938	0.9887	0.9871	0.987	0.9911	0.9893	0.9644	0.9947	0.9461	0.9953	0.9863	0.9835	0.8727	0.9886	0.9852	1	0.9955	0.9928	0.9984	0.9964	0.99	0.9366	0.9681	1	0.9861	0.8989	0.9402	0.976	0.9949	0.9604	0.9942	1	0.994	0.9352
HMGCL	1080	ES	07:08:00	6	9	0	1	0.1049	0.0169	1	0.971	0.9868	0.9889	0.9703	1	0.9348	0.9773	0.9809	0.9539	1	0.9679	0.9965	0.9853	0.9526	0.9854	1	0.9959	0.9854	0.9839	0.966	0.9747	0.9411	0.9694	0.9809	0.995	0.9819	0.9723	0.9456	0.9883	0.9952	0.8951	0.9464	0.9838	1	0.9592	0.9659	0.9757	0.9855	0.9877
MYOM3	1085	AT	31.2			0	0.993	0.6108	0.0772	0	0	0	0	0	0	0	0	0	0.0313	0.1242	0	0	0	0.2198	0	0	0	0	0	0	0	0	0	0	0	0	0	0	0	0	0	0	0	0	0	0	0	0	0
MYOM3	1086	AT	39			0	0.993	0.6108	0.0772	1	1	1	1	1	1	1	1	1	0.9687	0.8758	1	1	1	0.7802	1	1	1	1	1	1	1	1	1	1	1	1	1	1	1	1	1	1	1	1	1	1	1	1	1
IFNLR1	1092	AT	7.2			0	1	0.3447	0.0591	0	0	0	0.0375	0	0	0	0.0655	0	0.0413	0	0.1519	0	0	0.0214	0	0	0	0.0852	0	0	0.1362	0	0.0364	0	0	0	0	0.0279	0	0	0	0.2827	0.0407	0	0.024	0	0	0	0.1924
IFNLR1	1093	AT	5.2			0	1	0.3518	0.0559	0.0226	0.1026	0.0566	0.0087	0	0.2064	0	0.2342	0.1742	0.0381	0.0493	0.1052	0.0501	0.0519	0.0296	0.0359	0.0262	0.0395	0.0197	0.0667	0.0783	0.2514	0	0.1175	0.0285	0.069	0.1337	0.1022	0.1159	0	0.0691	0.168	0.2187	0.0376	0	0.0999	0	0	0.0944	0.0296
IFNLR1	1094	AT	8.2			0	1	0.5013	0.0848	0.9774	0.8974	0.9434	0.9538	1	0.7936	1	0.7003	0.8258	0.9206	0.9507	0.743	0.9499	0.9481	0.949	0.9641	0.9738	0.9605	0.8951	0.9333	0.9217	0.6125	1	0.8462	0.9715	0.931	0.8663	0.8978	0.8562	1	0.9309	0.832	0.4987	0.9217	1	0.8761	1	1	0.9056	0.778
IFNLR1	1096	ES	7.1	6	8.1	0	0.815	0.7134	0.087	1	0.8577	0.9126	0.9605			0.937	1	0.2866	0.8333	1	1	0.9318	1	1	0.9497	0.8393	1	0.9162	0.7735	0.9278		1	1	0.8723	1	1		0.8933	0.8393				1	0.7627	1	1	1		1
GRHL3	1099	AT	17			0	0.8691	0.7833	0.0956	1		0.9409	1	1	1	1	0.9863	1	1	1	0.9496	1	1	0.9842	0.8872	1	0.974	0.9902	0.9885	1	1	1	1	1	1	0.9731		0.9786	1	1	1		1	1	0.9435	0.6088	1	1	1
GRHL3	1100	AT	18			0	0.8691	0.7833	0.0956	0		0.0591	0	0	0	0	0.0137	0	0	0	0.0504	0	0	0.0158	0.1128	0	0.026	0.0098	0.0115	0	0	0	0	0	0	0.0269		0.0214	0	0	0		0	0	0.0565	0.3912	0	0	0
STPG1	1103	AP	2			0	0.8691	0.5736	0.0652	1	0.9615	0.9581	0.9519	0.7445	1		0.8207		1	1	0.8724	0.9493	0.8911	0.9581	0.969	1	0.9668	0.9811	0.7223	0.9002				0.9433	0.8207	0.9398		0.9562					0.966	1	0.9747	0.9123	0.9725		0.9581
STPG1	1104	AP	3.1			0	0.8691	0	0	0	0	0	0	0	0		0		0	0	0	0	0	0	0	0	0	0	0	0				0	0	0		0					0	0	0	0	0		0
STPG1	1105	AP	1			0	0.8691	0.5736	0.0652	0	0.0385	0.0419	0.0481	0.2555	0		0.1793		0	0	0.1276	0.0507	0.1089	0.0419	0.031	0	0.0332	0.0189	0.2777	0.0998				0.0567	0.1793	0.0602		0.0438					0.034	0	0.0253	0.0877	0.0275		0.0419
STPG1	1106	ES	4	3.2	5	0	0.9843	0.6765	0.1381	1	0.964	0.6801	1	1	0.9072		0.7485	1	0.8281	1	1	1	1	1	0.959	1	0.5801	0.9583	1	0.7004	1	1	0.9034	0.7683	0.9034	0.9583		1	1	1	1	1	1	0.9551	1	0.6297	0.3559	1	1
NIPAL3	1109	AT	14			0	1	0.8008	0.1296	0.154	0.1047	0.1251	0.2116	0.1799	0.1991	0.371	0.3174	0.4983	0.269	0.6839	0.2747	0.2404	0.2853	0.3448	0.0784	0.2444	0.2674	0.1246	0.2991	0.2397	0.5844	0.365	0.2274	0.2517	0.4735	0.3425	0.3805	0.4471	0.5388	0.5879	0.5943	0.2908	0.0778	0.1534	0.3784	0.3344	0.1316	0.4708	0.2741
NIPAL3	1110	AT	9			0	1	0.1897	0.0137	0.0031	0.0397	0.0023	0.0189	0.0132	0.0171	0.0015	0.0064	0.0057	0.0061	0.0168	0.0484	0.009	0.0054	0.0014	0.0059	0.0094	0.0097	0.0107	0.0238	0.0057	0.0288	0.0028	0.0033	0.0154	0.0148	0.0157	0.0197	0.0393	0.0103	0.0044	0.0228	0	0.0065	0	0.0132	0.0138	0.0075	0.0027	0.0403
NIPAL3	1111	AT	15			0	1	0.7972	0.1319	0.8429	0.8556	0.8725	0.7696	0.8069	0.7838	0.6274	0.6762	0.496	0.7249	0.2994	0.6769	0.7507	0.7093	0.6538	0.9157	0.7462	0.7228	0.8647	0.6772	0.7545	0.3868	0.6322	0.7693	0.7329	0.5117	0.6418	0.5998	0.5136	0.4508	0.4077	0.383	0.7092	0.9156	0.8466	0.6084	0.6517	0.861	0.5265	0.6856
NIPAL3	1112	ES	3	2	4	0	0.8586	1	0.0923	0	0.1391	0.0229	0		0	0	0.027		0.0816	0.0597	0.198	0.0146	0.0331	0.027	0.0175		0.0447	0.0175	0.1176	0.129			0	0.069	0.2025	0.0597		0.129	0	0			0.0426	0	0		0.027		0.1429
RCAN3	1115	AA	4.1	3	4.2	0	0.9651	0	0	1	1	1	1	1	1	1	1		1	1	1	1	1	1	1	1	1	1	1	1		1	1	1	1	1	1	1		1	1	1	1	1	1	1	1	1	1
RCAN3	1116	ES	4.1:4.2	3	5	0	1	0.0553	0.0077	1	1	1	1	1	1	1	1	1	1	1	0.9911	1	0.982	1	1	1	1	1	1	1	1	1	1	1	1	1	1	1	1	1	1	1	1	1	1	1	1	0.9472	1
RCAN3	1118	ES	3:4.1:4.2	2	5	0	1	0.0525	0.0075	1	1	1	1	1	0.9692	1	1	1	0.9851	1	0.9926	1	1	1	1	1	1	1	0.9744	1	1	1	1	0.9796	1	1	1	1	1	1	1	1	1	1	1	1	1	0.9475	1
RCAN3	1122	ES	3	2	4.1	0	0.9983	0.2486	0.0283	1	0.9762	0.9773	1	0.9676	1	1	1	1	0.9685	0.9758	0.9924	0.976	0.9566	1	0.9735	1	0.9675	1	0.9715	0.9683	1	1	1	0.9778	0.968	0.9722	1	0.9315	1	0.8614	1	0.8503	0.9812	0.9662	1	0.975	1	1	0.9724
SRRM1	1128	ES	16	15	17	0	0.9948	0.6465	0.1024	0.7539	0.9286	0.6787	0.6718	0.5893	0.7196	0.9157	0.5946	0.7032	0.8962	0.6737	0.6275	0.7682	0.8192	0.5674	0.6064	0.6528	0.6555	0.6555	0.7317	0.7986	0.6435	0.824	0.7128	0.7128	0.5211	0.8181	0.8816	0.5287	0.8336	0.7231	0.7895	0.7471	0.8119	0.8481	0.5812	0.728	0.7852	0.5969	0.6935
SRRM1	1129	AD	12.2	12.1	13	0	0.9948	0.5223	0.0637	0.7122	0.7744	0.8062	0.746	0.8082	0.8822	0.8462	0.898		0.8506	0.8903	0.8353	0.748	0.8063	0.7814	0.7084	0.9013	0.84	0.7766	0.8305	0.8666	0.8164	0.876	0.6873	0.853	0.6815	0.8349	0.7821	0.8792	0.8342	0.6519	0.7664		0.8226	0.686	0.804	0.9093	0.7542	0.8884	0.7953
SRRM1	1130	ES	11	10.2	12.1	0	0.9843	0.3077	0.0451	0.0384	0.0156	0.038	0.0702	0.097	0.156	0.0456	0.0907		0.0217	0.0395	0.1486	0.1393	0.0938	0.0907	0.0176	0.0374	0.0072	0.0248	0.0277	0.0533		0.0942	0.072	0.0117	0.0607	0.0907	0.2025	0.0624	0.1486	0.2853	0	0	0.0172	0.0803	0.0529	0.0156	0.0156	0.0835	0.098
SRRM1	1131	AA	10.1	9	10.2	0	0.9913	0.0158	0.0009	1	1	1	1	1	1	1	1		1	1	1	1	1	1	1	1	1	1	1	1	1	1	1	1	1	1	1	1	1		1	1	1	1	1	1	1	1	1
SRRM1	1132	AA	8.1	7	8.2	0	1	0.2075	0.0242	0.9616	0.9739	0.947	0.9414	0.9899	0.9636	0.7925	0.9639	1	0.9555	1	0.9555	0.947	0.986	0.9663	0.9802	0.9501	0.9761	0.9739	0.9534	0.9866	1	0.9905	0.9861	0.9587	0.9619	0.9533	0.9579	0.9868	0.9811	0.9507	1	0.9512	0.9469	0.9102	0.9385	0.971	0.9766	1	0.9656
SRRM1	1133	ES	04:05:00	3	6	0	0.9913	1	0.1267	0.1532	0.196	0.1751	0.339	0.168	0.5251	0.5801	0.3005		0.1674	0.0445	0.3619	0.706	0.291	0.2567	0.1337	0.1398	0.0706	0.2741	0.2012	0.4289	0.299	0.4796	0.2406	0.147	0.13	0.3148	0.293	0.1432	0.0674	0.4937	0.1568	0.3153	0.0383	0	0.1843	0.0736	0.0276	0.2851	0.4817
CLIC4	1134	RI	6.2	6.1	6.3	0	1	0.006	0.0009	0.9972	1	0.9982	0.9963	1	1	1	1	1	1	1	0.9985	1	1	0.9983	1	1	1	1	1	0.9982	1	1	0.9973	1	1	1	1	1	1	1	1	1	0.9993	1	1	1	1	1	1
SYF2	1139	ES	3	2	4	0	0.9983	0.0431	0.007	0.9892	0.9951	0.9928	0.9894	0.9945	0.9941	1	1	0.9962	0.987	1	0.9969	0.9967	0.9926	0.992	0.997	1	0.9903	0.9961	0.9755	0.9884	0.9882	0.9958	0.9877	0.997	1	0.9796	1	0.9717	0.9854	0.9738	1	0.9937	0.9955	0.9854	0.9968	0.9873	0.9803	0.9941	0.9962
C1orf63	1140	AP	2			0	1	0.7282	0.0872	0.8471	0.8075	0.8218	0.7811	0.693	0.8369	0.2823	0.8211	0.8056	0.8128	0.8789	0.7932	0.766	0.8729	0.8604	0.8168	0.8953	0.8203	0.6996	0.8058	0.8828	0.8757	0.7745	0.799	0.8579	0.8773	0.8419	0.8614	0.7781	0.8048	0.9417	0.882	0.9062	0.6459	0.9155	0.7786	0.7666	0.9385	0.8556	0.7887
C1orf63	1141	AP	1			0	1	0.7282	0.0872	0.1529	0.1925	0.1782	0.2189	0.307	0.1631	0.7177	0.1789	0.1944	0.1872	0.1211	0.2068	0.234	0.1271	0.1396	0.1832	0.1047	0.1797	0.3004	0.1942	0.1172	0.1243	0.2255	0.201	0.1421	0.1227	0.1581	0.1386	0.2219	0.1952	0.0583	0.118	0.0938	0.3541	0.0845	0.2214	0.2334	0.0615	0.1444	0.2113
C1orf63	1145	ES	5.1:5.2:6.1	4.2	6.2	0	0.9878	1	0.2912	0.9373	0.7083	0.7467	0.7712	0.7015	0.7198	0.9215	0.8153	0.8823	0.9078	0.5285	0.3453	0.9712	0.8284	0.3326	0.8383	0.9294	0.6876	0.8507	0.7959	0.8806	0.9623	0.9429	0.9708	0.7236	0.1941	0.9698	1	0.7657	0.9474	0.6171	0.7602	0.7552	0	0	0.3006	0.3669	0.078	0.5797	0.4599
C1orf63	1146	AA	6.1	4.2	6.2	0	0.9302	1	0.2897	0.5733	0.6663	0.7858	0.7665	0.7157	0.7574		0.6264	0.8963	0.8044	0.3543	0.7819	0.9611	0.9012	0.4529	0.2325		0.4991	0.736	0.5766	0.7813		0	0.9204	0.8094	0.7289	0.8415		0.5206		0	0.6596	0	0.5949	0.4202	0.5213	0.3868	0.0831	0.524	0.3845
C1orf63	1147	ES	5.1:5.2:5.3	4.2	6.2	0	0.9948	0.9881	0.2209	0.8409	0.6192	0.622	0.7024	0.7117	0.692	0.9128	0.66	0.6639	0.7889	0.3149	0.5673	0.9545	0.8389	0.2587	0.6168	0.84	0.5765	0.7547	0.7021	0.8063	0.8975	0.8542	0.9423	0.7462	0.4906	0.9311	1	0.5547	0.8919	0.2977	0.6369	0.5101	0.2836	0.1466	0.3644	0.3807	0.1495	0.4034	0.3481
C1orf63	1148	ES	4.2:5.1	4.1	5.2	0	0.9581	0.0201	0.0009	1	1	1	1	1	1	1	1	1	1	1	1	1	1	1	1	1	1	1	1	1	1	1	0.9799	1	1	1	1	1	1	1	1	1		1	1	1	1	1	1
RHCE	1185	ES	07:08:09	6	10	0	0.8272	0.4676	0.0544			1	0.9094	0.8117	1	1	1	0.8607	1	1	1	1	1	0.9635	1	1	1	1	1	0.8943	1	1	1	1		1		1	1	0.8287	1		1	1	0.9549	1	1	1
TMEM57	1189	ES	05:06:00	4	7	0	1	0.0749	0.0106	0.9718	1	0.9834	0.9916	1	0.9747	0.9817	1	1	1	1	1	1	0.9826	0.9894	1	1	1	1	1	1	1	0.9868	1	1	0.9808	0.987	1	1	0.9704	1	1	1	0.9937	1	0.9899	0.992	1	1	0.9867
TMEM57	1190	ES	2:3:4:5:6	1	7	0	1	0.0414	0.0035	1	1	1	1	1	1	1	1	1	1	1	1	1	1	1	1	1	1	1	1	1	1	1	1	1	0.9765	1	1	1	1	1	1	1	1	1	1	1	1	1	1
MAN1C1	1192	AP	4			0	1	0.7901	0.154	0.6129	0.3582	0.6085	0.7047	0.8234	0.6276	0.7621	0.6464	0.9218	0.8137	0.9127	0.8752	0.7265	0.7533	0.5432	0.6475	0.585	0.6158	0.7472	0.815	0.961	0.7806	0.8386	0.8279	0.6258	0.9234	0.8573	0.9414	0.904	0.8474	0.9302	0.8813	1	0.6146	0.7826	0.7513	0.6277	0.7286	0.8323	0.8382
MAN1C1	1193	AP	1			0	1	0.7901	0.154	0.3871	0.6418	0.3915	0.2953	0.1766	0.3724	0.2379	0.3536	0.0782	0.1863	0.0873	0.1248	0.2735	0.2467	0.4568	0.3525	0.415	0.3842	0.2528	0.185	0.039	0.2194	0.1614	0.1721	0.3742	0.0766	0.1427	0.0586	0.096	0.1526	0.0698	0.1187	0	0.3854	0.2174	0.2487	0.3723	0.2714	0.1677	0.1618
SEPN1	1195	ES	3	2	4	0	0.9913	0.891	0.0796	0.3127	0.3028	0.3106	0.2774	0.2816	0.2272	0.3403	0.3515	1	0.2761	0.3438	0.26	0.4099	0.2854	0.2262	0.1589	0.3537	0.3139	0.3141	0.136	0.4332		0.5493	0.3118	0.3652	0.2909	0.428	0.4477	0.2554	0.3267	0.3165	0.4128		0.1627	0.3434	0.314	0.1844	0.1784	0.3639	0.2375
MTFR1L	1196	AP	4.1			0	1	0.7436	0.1177	0.2592	0.2331	0.23	0.2651	0.3502	0.4474	0.2342	0.307	0.647	0.3258	0.3592	0.4658	0.4347	0.2199	0.3491	0.2606	0.2573	0.2748	0.2546	0.3141	0.3475	0.4966	0.4542	0.4365	0.3446	0.5322	0.4109	0.462	0.293	0.5058	0.2608	0.3865	0.3553	0.1441	0.1805	0.3174	0.2174	0.1598	0.2243	0.387
MTFR1L	1197	AP	3.1			0	1	0.2885	0.0531	0.0915	0.071	0.0961	0.1547	0.0797	0.1489	0.0363	0.0599	0.0656	0.1597	0.2012	0.0555	0.2114	0.0941	0.0195	0.2003	0.1706	0.1519	0.0865	0.0553	0.0958	0.0872	0.1566	0.1445	0.1161	0.0904	0.1235	0.089	0.0948	0.2506	0.0365	0.0225	0.1612	0.0274	0.0734	0.1079	0.168	0.0101	0.0689	0.1444
MTFR1L	1198	AP	1			0	1	0.865	0.158	0.5726	0.6491	0.6332	0.4989	0.4517	0.295	0.6936	0.54	0.2388	0.4576	0.2721	0.3596	0.1666	0.6141	0.5927	0.4281	0.4941	0.4644	0.5911	0.5758	0.5092	0.3176	0.3403	0.3159	0.4311	0.2654	0.3793	0.2377	0.4923	0.0537	0.6787	0.5464	0.4608	0.738	0.7254	0.4784	0.476	0.8	0.5021	0.3906
MTFR1L	1199	AP	2.1			0	1	0.2413	0.0445	0.0767	0.0468	0.0408	0.0814	0.1184	0.1087	0.0359	0.0932	0.0487	0.0569	0.1675	0.1191	0.1873	0.0719	0.0387	0.1111	0.078	0.1089	0.0678	0.0548	0.0475	0.0987	0.049	0.1031	0.1082	0.112	0.0863	0.2114	0.1199	0.1898	0.0241	0.0446	0.0228	0.0905	0.0208	0.0962	0.1386	0.0301	0.2047	0.078
MTFR1L	1202	AT	10.5			0	1	0	0	0	0	0	0	0	0	0	0	0	0	0	0	0	0	0	0	0	0	0	0	0	0	0	0	0	0	0	0	0	0	0	0	0	0	0	0	0	0	0	0
MTFR1L	1204	AT	11			0	1	0	0	1	1	1	1	1	1	1	1	1	1	1	1	1	1	1	1	1	1	1	1	1	1	1	1	1	1	1	1	1	1	1	1	1	1	1	1	1	1	1	1
MTFR1L	1205	AA	10.1:10.2:10.3	9	10.4	0	1	0.0561	0.0068	1	0.9945	0.9922	1	1	1	1	1	1	0.9907	1	1	1	1	0.9914	0.9895	1	1	0.9877	1	0.9947	1	0.9828	1	0.9916	0.9932	1	1	1	0.9439	0.9911	1	1	1	1	0.9945	1	0.9928	1	1
MTFR1L	1207	AA	10.3	9	10.4	0	0.9564	0.3415	0.0456	1	0.9531	0.937	1		1	1	1	1	0.9554	1	1	1	1	0.9201	0.9301		1	0.938	1	0.9692	1	0.9215	1	0.9517	0.9585	1	1	1	0.6585	0.952	1		1	1	0.9654	1	0.9141	1	1
MTFR1L	1208	AA	10.1	9	10.2	0	1	0.3057	0.0302	0.9648	0.8835	0.9885	0.9627	0.97	0.9888	1	0.9542	0.9608	0.95	0.9555	0.9466	0.9245	0.9633	0.9648	0.932	0.9537	0.9537	0.9337	0.9072	0.9715	0.9696	0.9831	0.9895	0.9565	0.9683	1	0.9342	0.9472	1	0.9616	0.9593	0.9817	0.9726	0.9429	0.9619	0.972	0.9555	0.936	0.986
MTFR1L	1209	AA	10.1:10.2	9	10.3	0	1	0.2363	0.0418	0.8725	0.9078	0.9043	0.8287	0.9783	0.9238	0.8928	0.9363	0.9205	0.8451	0.8392	0.8872	0.8902	0.8878	0.9179	0.8871	0.9793	0.8743	0.8502	0.869	0.8736	0.9187	0.8486	0.8934	0.868	0.8776	0.9329	0.8598	0.8656	0.9067	0.8703	0.7852	0.9531	0.9327	0.8979	0.8825	0.8827	0.937	0.9335	0.8819
MTFR1L	1210	AA	10.2	9	10.3	0	0.8901	0.9	0.1465	0.1988	0.5689	0.1008	0.1637		0.1206	0	0.4153	0.3216	0.2253	0.1916	0.3152	0.4051	0.2316	0.2867	0.3646		0.2509	0.2876	0.401	0.1735		0.0928	0.0817	0.2295	0.1958	0	0.3166	0.2672		0.2085	0.1382		0.2879	0.3551	0.2308	0.1792	0.414	0.4904	0.0986
MTFR1L	1211	ME	5|6	4.2	7.2	0	0.9756	0.6905	0.1264	0.5666	0.5786	0.8139	0.5854	0.8767	0.6376	0.9544	0.8395	0.6971	0.6766	0.5185	0.5867	0.5038	0.7945	0.6588	0.7038	0.6355	0.5264	0.7733	0.626	0.5854	0.4862	1	0.5958	0.626	0.5465	0.5909	0.7854	0.5112	0.7151	0.6531	0.6419	1	0.5792	0.4927	0.7094	0.6766	0.7094	0.6588	0.7547
MTFR1L	1212	AA	7.1	4.2	7.2	0	0.9895	0.7124	0.1026	0.1606	0.0735	0.0702	0.0968	0.0296	0.232	0.1409	0.0869	0.2839	0.1705	0.1051	0.1588	0.668	0.1581	0.1304	0.0192	0.0937	0.1745	0.1153	0.1044	0.1735	0.6789	0.3146	0.2142	0.2749	0.3458	0.1561	0.3353	0.2128	0.4188	0.081	0.2098	0.1801	0.019	0	0.1087	0.0348	0	0.0561	0.1143
MTFR1L	1213	ES	6	4.2	7.2	0	0.9965	0.7339	0.1107	0.2501	0.0995	0.0595	0.3172	0.0444	0.3362	0.0083	0.0882	0.2321	0.1519	0.3784	0.2438	0.7339	0.095	0.1452	0.146	0.1591	0.3403	0.0922	0.1245	0.2214	0.6286	0	0.2495	0.3445	0.5229	0.2529	0.1495	0.2288	0.099	0.0822	0.1598	0	0.1007	0.1583	0.1434	0.1727	0.0277	0.1358	0.0872
MTFR1L	1214	ES	5	4.2	7.2	0	1	0.8835	0.1188	0.3036	0.1317	0.2169	0.3962	0.2485	0.4712	0.1485	0.3359	0.4102	0.2725	0.396	0.3139	0.7369	0.2887	0.247	0.2888	0.248	0.3643	0.2573	0.1922	0.2865	0.6156	0.4751	0.3288	0.468	0.5691	0.3284	0.3916	0.2368	0.2162	0.1443	0.2542	0.2607	0.1336	0.1544	0.29	0.304	0.0649	0.2328	0.2272
AUNIP	1219	AT	3.2			0	1	0.4829	0.0643	0.6294	0.5006	0.5821	0.6015	0.4993	0.476	0.8213	0.5947	0.698	0.4147	0.5049	0.4238	0.4495	0.5511	0.5862	0.5614	0.6131	0.5398	0.5217	0.5572	0.5018	0.4732	0.3802	0.4377	0.5765	0.3977	0.4732	0.4783	0.6056	0.4054	0.5461	0.5722	0.52	0.5042	0.4804	0.5321	0.5002	0.4156	0.5521	0.3426
AUNIP	1220	AT	4			0	1	0.4829	0.0643	0.3706	0.4994	0.4179	0.3985	0.5007	0.524	0.1787	0.4053	0.302	0.5853	0.4951	0.5762	0.5505	0.4489	0.4138	0.4386	0.3869	0.4602	0.4783	0.4428	0.4982	0.5268	0.6198	0.5623	0.4235	0.6023	0.5268	0.5217	0.3944	0.5946	0.4539	0.4278	0.48	0.4958	0.5196	0.4679	0.4998	0.5844	0.4479	0.6574
STMN1	1221	AP	3			0	0.9895	0.0474	0.0058	0.0153	0.0204	0.0098	0.014	0.0054	0.0163	0	0.0203	0.0377	0.012	0.0107	0.0197	0.0133	0.0092	0.0121	0.0137	0.0176	0.02	0.0106	0.0137	0.0061	0.0093	0.0051	0.0119	0.0061	0.01	0.0097	0.008	0.0126	0.0203	0.0134	0.0146	0.0142	0.014	0.0101	0.0135	0.0142	0.0126	0.0108	0.0107
STMN1	1222	AP	4			0	0.9895	0.0656	0.0042	0.0047	0.0008	0	0.0016	0.0022	0.0022	0	0	0	0	0.006	0.0061	0	0.0129	0.001	0.0048	0	0.0105	0.0014	0.0034	0.001	0	0.0035	0.0037	0	0.0111	0.009	0	0.0022	0	0.0017	0	0.0011	0	0	0	0.0018	0	0	0
STMN1	1223	AP	2			0	0.9895	0.0891	0.008	0.9776	0.9776	0.9883	0.9811	0.9838	0.9815	1	0.9797	0.9623	0.988	0.9803	0.9742	0.9867	0.9779	0.9855	0.9743	0.9824	0.966	0.9873	0.9824	0.9929	0.9907	0.9914	0.9844	0.9925	0.9789	0.9814	0.992	0.9852	0.9797	0.9849	0.9844	0.9838	0.984	0.9899	0.9865	0.9831	0.9863	0.9892	0.9862
STMN1	1224	AP	1			0	0.9895	0.0178	0.0022	0.0024	0.0012	0.002	0.0033	0.0086	0	0	0	0	0	0.003	0	0	0	0.0014	0.0072	0	0.0035	0.0007	0.0006	0	0	0	0	0.0014	0	0	0	0	0	0	0.001	0.0008	0.0021	0	0	0.0009	0.0011	0	0.0031
STMN1	1225	AT	9			0	1	0.0352	0.0038	0.0054	0.0027	0.0037	0.0023	0.0007	0.0025	0.0062	0.001	0.0039	0.006	0	0.0014	0.0036	0.0088	0.0003	0.0028	0	0.0048	0.0049	0.0012	0.0076	0.0006	0.0058	0	0.0013	0.0021	0.0049	0.0008	0.0024	0.0022	0.001	0.0007	0.0003	0.0111	0.0051	0.0021	0.0002	0.0004	0.0016	0.0054
STMN1	1226	AT	8			0	1	0.0352	0.0038	0.9946	0.9973	0.9963	0.9977	0.9993	0.9975	0.9938	0.999	0.9961	0.994	1	0.9986	0.9964	0.9912	0.9997	0.9972	1	0.9952	0.9951	0.9988	0.9924	0.9994	0.9942	1	0.9987	0.9979	0.9951	0.9992	0.9976	0.9978	0.999	0.9993	0.9997	0.9889	0.9949	0.9979	0.9998	0.9996	0.9984	0.9946
ZNF593	1230	RI	2.2	2.1	2.3	0	0.993	0.1295	0.0102	0.0165	0.008	0.0044	0.0056	0.0068	0.0136	0.0144	0.0052	0.0061	0.0177	0.0064	0.0127	0.02	0.0204	0.0025	0.0052	0.0118	0.0016	0.0085	0.0039	0.01	0	0.0264	0.0144	0.0052	0.0125	0.0048	0.0234	0.0076	0.0095	0.0053	0	0.0033	0	0.0082	0.0047	0.0075	0.0021	0.0038	0.014
CNKSR1	1231	AP	1.1			0	0.9878	1	0.0912	0.9303	1	0.9648	0.9929	0.9727	0.8696	0.9337	0.9681	1	0.955	0.9879	0.7693	0.9234	0.986	0.957	0.9934	1	0.9803	0.9724	0.9492	0.9657	0.9639	0.9902	0.8811	0.979	0.978	0.9747	0.9765	1	0.9422	0.8907	0.912	1	0.9749	1	0.992	0.9422		0.9861	0.7703
CNKSR1	1232	AP	2.1			0	0.9878	1	0.0912	0.0697	0	0.0352	0.0071	0.0273	0.1304	0.0663	0.0319	0	0.045	0.0121	0.2307	0.0766	0.014	0.043	0.0066	0	0.0197	0.0276	0.0508	0.0343	0.0361	0.0098	0.1189	0.021	0.022	0.0253	0.0235	0	0.0578	0.1093	0.088	0	0.0251	0	0.008	0.0578		0.0139	0.2297
CNKSR1	1236	RI	10.2	10.1	10.3	0	0.9459	1	0.1227	0.3673	0.194	0.3673	0.2481	0.0799	0.4904	0.2237	0.3419	0.1762	0.2629	0.2683	0.5075	0.4172	0.2467	0.1209	0.255	0.1467	0.1771	0.2854	0.4183	0.3048	0.2295	0.3261	0.4451	0.2175	0.3579	0.3462	0.4118	0.3402	0.2558	0.3697	0.2941		0.0601	0.129	0.1099	0.1401		0.1653	0.3939
CNKSR1	1238	AD	8.2	8.1	9	0	0.9721	0.6421	0.0813	0.1351	0.155	0.2302	0.08	0.2203	0.1493	0.1817	0.2546	0.2876	0.2517	0.2537	0.155	0.174	0.1479	0.1919	0.272	0.1186	0.2626	0.1778	0.3304	0.1412	0.3157	0.128	0.212	0.178	0.3087	0.2071	0.2737	0.2957	0.2015	0.3978	0.1685		0.1752	0.0189	0.073	0.4005		0.1061	0.1906
CNKSR1	1239	AA	6.1	5	6.2	0	0.9703	0.1498	0.0168	1	1	1	0.9436	0.9699	1	1	1	1	0.951	0.9542	1	0.9609	0.9797	1	0.9648	1	1	0.9919	1	0.9801	1	1	0.9789	1	0.9824	1	1	0.9749	1	1	1		1	1	0.9883	1		1	1
CNKSR1	1240	AD	1.2	1.1	2.2	0	0.9511	0.6032	0.0886	0.7422	0.7277	0.6574	0.7909	0.9645	0.8233	0.9367	1	0.819	0.7585	0.8095	0.925	0.8435	0.8139	0.7669	0.8564	0.8457	0.795	0.8013	0.7873	0.9645	0.6528	0.908	0.7933	0.7277	0.9314	0.8143	0.852	0.6934	0.8044	1	0.8685		0.8365	0.7835	0.7713	0.679		0.8947	0.8847
CEP85	1243	RI	14.3	14.2	14.4	0	1	0.0282	0.0024	1	1	1	1	1	1	1	1	1	1	1	1	1	1	1	1	1	1	1	1	1	1	1	1	1	1	1	1	1	1	1	1	1	1	1	1	1	1	1	1
CEP85	1244	AA	14.1	13	14.2	0	0.9075	0.6171	0.1	0.4129	0.3585	0.1621	0.2602	0.1422	0.3259	0.4532			0.2885		0.3781	0.2529	0.2789	0.3672	0.3346		0.3495	0.2946	0.2872	0.2438		0.1792	0.1214	0.206	0.1495	0.1142	0.2661	0.2582	0.293	0.1078		0.2439	0.2602	0.0882	0.2214	0.2293	0.401		0.205
CEP85	1245	ES	3	2	4	0	0.9843	0.0626	0.0045	1	1	1	1	1	1	1	1		1	1	1	1	1	1	1	1	1	1	1	1		1	1	1	1	1	1	1	1	1	1	1	1	1	1	1	1	1	1
SH3BGRL3	1246	RI	2.2	2.1	2.3	0	1	0.0923	0.0102	0.0236	0.0446	0.0151	0.0297	0.0167	0.0157	0.0124	0.0341	0.0187	0.0208	0.0176	0.0366	0.0361	0.0236	0.0171	0.0353	0.0202	0.0172	0.0308	0.0267	0.0207	0.0285	0.0216	0.0225	0.0235	0.0518	0.027	0.0272	0.0404	0.0164	0.0248	0.0266	0.0471	0.026	0.0163	0.0177	0.0659	0.0261	0.0202	0.0373
UBXN11	1249	AT	12.2			0	1	0.7665	0.1452	0.581	0.6449	0.6368	0.6439	0.3625	0.5499	0.3169	0.5046	0.4086	0.5698	0.5638	0.7194	0.7069	0.7228	0.5565	0.6197	0.6121	0.6273	0.6683	0.6054	0.6559	0.499	0.5938	0.7107	0.6406	0.6003	0.6144	0.5866	0.6165	0.6044	0.3864	0.5066	0.5919	0.276	0.4996	0.2626	0.5774	0.106	0.4117	0.6404
UBXN11	1250	AT	17			0	1	0.7665	0.1452	0.419	0.3551	0.3632	0.3561	0.6375	0.4501	0.6831	0.4954	0.5914	0.4302	0.4362	0.2806	0.2931	0.2772	0.4435	0.3803	0.3879	0.3727	0.3317	0.3946	0.3441	0.501	0.4062	0.2893	0.3594	0.3997	0.3856	0.4134	0.3835	0.3956	0.6136	0.4934	0.4081	0.724	0.5004	0.7374	0.4226	0.894	0.5883	0.3596
UBXN11	1251	ES	10	9	11	0	0.9948	0.3347	0.0428	0.9501	0.9357	0.976	0.8973	1	0.9843	0.8599	0.9093	1	0.92	0.8037	0.9537	0.9715	0.9497	1	0.9611	0.9	0.9621	0.9322	0.9744	0.9299	0.9714	0.9085	0.9442	0.9643	0.9408	0.9623	0.8468	0.838	0.9759	0.9517	1	1	0.9686	0.9582	0.9645	0.9738	1	0.9743	0.6653
UBXN11	1252	ES	7:8:9:10	6	11	0	0.9965	0.2848	0.0237	1	0.9372	1	1	1	1	1	1	1	1	1	0.9696	1	1	1	0.9178	1	1	1	1	1	1	1	1	1	0.9696	1	1	0.9469	1	1	1	1	1	1	1	1	1	1	1
UBXN11	1254	ES	6	5	7	0	0.9965	0.7015	0.1103	0.5993	0.5901	0.5034	0.5704	0.4664	0.426	0.7018	0.6975	0.6383	0.6128	0.7302	0.5757	0.4943	0.5049	0.7442	0.5544	0.5304	0.3818	0.5082	0.493	0.6531	0.8	0.7111	0.6032	0.7249	0.5341	0.6083	0.7213	0.5221	0.5696	0.8889	0.3884	0.4693	0.5779	0.5785	0.4909	0.7018	0.3704	0.4893	0.4465
UBXN11	1255	ES	3:4:5:6:7:8:9	2	10	0	0.8499	0.9862	0.2459	0.6107	0.5869	0.8445	0.6584		0.7769		0.2987	1	0.5858	1	0.8134	0.7053	0.4856	0.9051	0.5733			0.4771	1	1		1		1	0.5898	0.9043		0.4134	0.6376	0.4917			0.0737	0.5694	0.679	0.8439	0.1445	1	1
UBXN11	1256	ES	4:5:6:7:8:9	2	10	0	0.993	0.8254	0.1139	0.8551	0.8665	0.9771	0.8501	1	0.9129	1	0.8293	1	0.9285	1	0.8839	0.9106	0.9308	0.9593	0.9171	1	1	0.8121	1	1	1	1	1	1	0.8144	0.9721	1	0.8172	0.946	0.9016	1	1	0.783	0.8785	0.8915	0.9338	0.2046	1	1
UBXN11	1257	ES	5:6:7:8:9	2	10	0	0.7818	0.9323	0.2327	0.4245	0.6427	0.8873	0.7131		0.8379	1	0.2523	1	0.7901			0.5155	0.6366		0.749			0.5945	1	1			1		0.4368	0.7853	1	0.6044	0.6143	0.717		1	0.5207	0.6723	0.699		0.0677	1
UBXN11	1258	ES	3:4:5:7:8:9	2	10	0	0.8674	0.961	0.2164	0.6621	0.6426	0.9107	0.7192	1	0.8758		0.2638	1	0.5664		0.8715	0.8565	0.5569	0.8623	0.6257		1	0.622	1	1		1	1	1	0.792	0.9202		0.5687	0.7565				0.0732	0.6232	0.7702	0.8251	0.3697	1	1
UBXN11	1259	ES	4:5:7:8:9	2	10	0	0.9913	0.6224	0.0847	0.876	0.887	0.9867	0.8795	1	0.9527	1	0.7953	1	0.9214	1	0.9163	0.959	0.9472	0.9345	0.927	1	1	0.8791	1	1	1	1	1	1	0.9133	0.976	1	0.8844	0.9662	0.809	1	1	0.7805	0.8993	0.9248	0.9214	0.4615	1	1
UBXN11	1260	ES	5:7:8:9	2	10	0	0.7522	0.8812	0.2119	0.4536	0.6685	0.9242	0.7517		0.9004			1	0.7665			0.6816	0.7031		0.7511		1	0.6874	1	1			1		0.6154	0.7999		0.6934	0.6974		1	1	0.5169	0.7142	0.7587		0.1851	1
UBXN11	1261	ES	03:04:00	2	5	0	0.8726	0.9379	0.2034	0.7529	0.481	0.5	0.4885		0.4708		0.5957	0.4269	0.3242	1	0.9479	0.7649	0.3672	1	0.424		0.4535	0.4599	0.4577	0.4739		0.869	0.3611	0.9167	0.7267	0.7579		0.4135	0.5858			0.264	0.0856	0.4451	0.5436	0.9005	0.766	0.4986	0.6323
UBXN11	1262	ES	4	2	5	0	0.993	0.6524	0.091	0.908	0.7976	0.8709	0.7195	1	0.7052	0.7411	0.9398	0.8283	0.7992	1	0.9642	0.9224	0.8881	1	0.833	0.9384	0.8842	0.7801	0.742	0.7534	1	0.9255	0.8945	0.9766	0.8745	0.9136	0.694	0.7902	0.9267	0.7847	0.8708	0.6942	0.793	0.7996	0.8057	0.9563	0.8127	0.9308	0.7346
UBXN11	1263	ES	3	2	4	0	0.9337	0.6624	0.1072	0.2606	0.2264	0.1504	0.3184	0.1056	0.3059	0.0936	0.1083	0.1551	0.1176	0.2484	0.4872	0.263	0.0787	0.3552	0.1482	0	0.1263	0.2279	0.2655	0.2773		0.4164	0.0813	0.2761	0.3252	0.2679		0.1712	0.121			0.1521	0.0277	0.1986	0.2747	0.3446		0.087	0.4265
LIN28A	1271	RI	4.2	4.1	4.3	0	1	0.469	0.1058	0.6232	0.9118	0.8848	0.7868	1	1	1	0.9001	1	0.9347	1	0.949	0.8938	1	0.9237	0.9228	1	1	0.9246	1	0.8954	1	1	0.8986	1	0.9399	0.7372	0.8807	0.936	1	1	1	1	0.8921	0.8453	1	0.8986	1	0.8611	0.8417
DHDDS	1272	AT	6.2			0	1	0.2134	0.0332	0.1136	0.0792	0.0835	0.1007	0.0702	0.0855	0.1038	0.0546	0.0395	0.0483	0.1857	0.1215	0.0879	0.1131	0.0805	0.069	0.1255	0.0741	0.0534	0.0816	0.1471	0.0574	0.1666	0.0809	0.1081	0.1142	0.1068	0.1316	0.0494	0.0583	0.206	0.0993	0.1367	0.0511	0.1161	0.1282	0.1643	0.0775	0.1046	0.0931
DHDDS	1273	AT	10.2			0	1	0.5122	0.0722	0.7459	0.7685	0.7714	0.7194	0.8211	0.7667	0.7198	0.8141	0.7676	0.8052	0.5176	0.6999	0.7071	0.752	0.8214	0.8014	0.7751	0.7173	0.8538	0.7802	0.7336	0.7893	0.6757	0.686	0.7765	0.7581	0.7488	0.6542	0.7995	0.7359	0.5435	0.7074	0.6627	0.8678	0.7346	0.7458	0.6527	0.8304	0.7442	0.6292
DHDDS	1274	AT	7			0	1	0.4321	0.0564	0.1404	0.1523	0.1451	0.1799	0.1087	0.1478	0.1764	0.1313	0.193	0.1465	0.2967	0.1786	0.205	0.1349	0.0981	0.1297	0.0993	0.2087	0.0928	0.1382	0.1192	0.1533	0.1578	0.2331	0.1153	0.1277	0.1444	0.2142	0.1511	0.2058	0.2505	0.1933	0.2006	0.0811	0.1493	0.126	0.1831	0.092	0.1513	0.2777
DHDDS	1275	AA	10.1	9	10.2	0	0.9948	0.4916	0.0719	0.2321	0.1214	0.2438	0.2035	0.2835	0.3413	0.1769	0.3024	0.1267	0.1172	0.0484	0.1547	0.2383	0.1479	0.272	0.1784	0.2973	0.2618	0.236	0.2602	0.1055	0.2249	0.3259	0.2724	0.2949	0.2249	0.2588	0.1214	0.2125	0.2087	0.1746	0.2439	0.2088	0.2225	0.2501	0.1473	0.1792	0.2816	0.1621	0.2438
DHDDS	1276	ES	6.1	5	8	0	0.9983	0.3359	0.0418	0.9204	0.839	0.9275	0.8938	0.9428	0.8525	0.6641	0.9289	0.9188	0.9146	0.9457	0.9523	0.9617	0.9579	0.9383	0.9062	0.975	0.9242	0.9745	0.8889	0.8965	0.8529	0.9581	0.7827	0.9219	0.9238	0.9235	0.8294	0.9351	0.9003	0.9608	0.9368	0.887	0.916	0.9654	0.9714	0.8719	0.9045	0.9859	0.9046
DHDDS	1277	ES	5	4.2	6.1	0	1	0.0531	0.005	1	1	1	1	1	1	1	1	1	1	1	1	1	1	1	1	1	1	1	1	0.9878	1	1	1	1	1	1	1	1	1	1	1	1	1	1	1	1	1	1	0.9666
DHDDS	1278	AA	4.1	3	4.2	0	0.993	0.3544	0.0476	0.0844	0.1823	0.0452	0.0391	0.0604	0.2408	0.019	0.1511	0.0518	0.0106	0.0672	0.0862	0.0902	0.1332	0.0377	0.0589	0.0221	0.0465	0.0475	0.0565	0.0672	0.2368	0.0865	0.0235	0.0218	0.0931	0.0307	0.1312	0.0433	0	0	0.2416	0.1341	0.0417	0.0636	0.0317	0	0.0492	0.0463	0.1599
RPS6KA1	1279	AP	3			0	0.9983	0.3141	0.0443	0.0086	0.0453	0.0109	0.0559	0.0207	0.0301	0	0	0.0995	0	0.0428	0.0249	0.0867	0.0346	0.0244	0.0437	0	0.0147	0.0512	0	0	0	0	0.1452	0.0109	0.0144	0.0325	0.0257	0.0857	0.0512	0.0485	0	0	0.0483	0.059	0.0607	0.0439	0	0.013	0
RPS6KA1	1280	AP	1			0	0.9983	0.9266	0.1957	0.3305	0.6202	0.1797	0.5103	0.7803	0.6414	0.5067	0.4133	0.7898	0.3621	0.786	0.5435	0.6383	0.635	0.7187	0.7102	0.8498	0.572	0.7515	0.4413	0.5551	0.8663	0.5104	0.537	0.33	0.7124	0.4843	0.6883	0.9143	0.6604	0.2565	0.5602	0.9304	0.6629	0.7419	0.6868	0.8938	0.4993	0.4136	0.4443
RPS6KA1	1281	AP	7			0	0.9983	0.8855	0.1796	0.5344	0.2722	0.6412	0.3858	0.0922	0.251	0.4134	0.4511	0.1108	0.6094	0.0238	0.3603	0.2253	0.2233	0.1449	0.1521	0.0847	0.3209	0.1709	0.4468	0.4449	0.0525	0.4241	0.2498	0.6403	0.2238	0.3712	0.286	0	0.171	0.6116	0.4398	0.0696	0.2195	0.1314	0.169	0.0245	0.4045	0.551	0.3935
RPS6KA1	1282	AP	5			0	0.9983	0.6037	0.0705	0.1265	0.0623	0.1683	0.0481	0.1068	0.0776	0.0799	0.1356	0	0.0285	0.1473	0.0714	0.0497	0.1071	0.112	0.094	0.0655	0.0925	0.0264	0.112	0	0.0812	0.0655	0.0681	0.0188	0.0494	0.112	0	0	0.1174	0.0834	0	0	0.0692	0.0677	0.0836	0.0378	0.0962	0.0224	0.1622
RPS6KA1	1286	AA	16.1	15	16.2	0	0.9983	0.0675	0.0087	0.9934	1	0.994	0.9927	1	1	1	0.9884	1	1	1	0.9639	1	0.9967	1	1	1	1	0.9843	0.9828	1	1	0.9889	1	0.9857	1	0.9886	0.9325	1	1	1	1	1	1	1	1	1	1	1	1
RPS6KA1	1287	ES	12	11	13	0	0.993	0.2402	0.0178	0.0126	0.009	0	0.0106	0.0095	0.0301	0	0.0165	0	0.0292	0	0.0074	0.0164	0.0251	0	0.0084	0	0.0036	0.0252	0.0144	0.0839	0	0.0068	0.0095	0.0206	0.0097	0.0071	0	0	0.0405	0	0	0.0394	0.003	0	0.0148	0	0.0137	0	0
RPS6KA1	1289	ES	8	4	9	0	0.9983	0.0904	0.0106	1	1	1	1	1	1	0.9738	1	1	1	1	0.9873	1	0.9935	0.9931	1	1	0.9943	1	1	1	1	1	1	1	1	1	1	1	1	1	1	1	0.9845	1	1	0.9814	0.9827	1	1
RPS6KA1	1290	ES	08:09:00	4	10	0	0.9983	0.1804	0.0088	1	1	1	1	1	1	1	1	1	1	0.977	1	1	0.9971	1	1	1	1	1	1	1	1	1	1	1	1	1	1	1	1	1	1	1	1	1	1	1	1	1	1
RPS6KA1	1292	ES	2	1	4	0	0.9162	0.5176	0.0386	0.0268	0	0.0345	0.0226	0	0	0	0.0611		0	0	0	0.0122	0.0286	0.0461	0.0473	0.0428	0.0084	0.0091	0		0	0	0	0.0295	0.0185	0.0241	0	0	0	0			0.005	0.0176	0.0089	0	0	0	0
ARID1A	1293	AP	2.1			0	0.9581	0.911	0.1469	0	0	0	0.0338	0	0	0	0.0836		0	0.3222	0.125	0.0425	0.2123	0	0.0373	0	0.0573	0.0102	0.1175	0.3093	0	0.2603	0.183	0	0.2282	0	0	0.0822	0.1847				0	0	0.3093	0	0	0	0.3143
ARID1A	1295	AP	1			0	0.9581	0.911	0.1469	1	1	1	0.9662	1	1	1	0.9164		1	0.6778	0.875	0.9575	0.7877	1	0.9627	1	0.9427	0.9898	0.8825	0.6907	1	0.7397	0.817	1	0.7718	1	1	0.9178	0.8153				1	1	0.6907	1	1	1	0.6857
ARID1A	1296	AA	18.1	17	18.2	0	1	0.0544	0.0047	1	1	1	1	1	1	0.9964	1	1	1	1	0.9829	1	1	1	1	1	1	1	0.9914	0.9907	1	1	0.9877	1	1	1	1	1	1	1	1	1	0.9955	1	1	0.9869	1	1	1
ARID1A	1297	ES	18.1:18.2	17	19	0	1	0.0161	0.0017	1	1	1	1	1	1	1	1	1	1	1	1	1	0.9956	1	1	1	1	0.9977	1	1	1	0.9839	0.9893	1	1	1	1	1	1	1	1	1	1	1	1	1	1	1	1
PIGV	1299	AP	1			0	0.9599	0.8833	0.1726	0.3936	0.4229	0.3124	0.2295	0.1538	0.3439		0.4177	0.5024	0.2015	0.2325	0.5534	0.3124	0.3269	0.4969	0.4836	0.5118	0.3671	0.2211	0.4309	0.3354		0.4556	0.3483	0.1354	0.3681	0.1334		0.2923	0	0.476		0	0.3962	0.4177	0.445	0.476	0.4523	0.3483	0.4933
PIGV	1300	AP	2.1			0	0.9599	0.8833	0.1726	0.6064	0.5771	0.6876	0.7705	0.8462	0.6561		0.5823	0.4976	0.7985	0.7675	0.4466	0.6876	0.6731	0.5031	0.5163	0.4882	0.6329	0.7789	0.5691	0.6646		0.5444	0.6517	0.8646	0.6319	0.8666		0.7077	1	0.524		1	0.6038	0.5823	0.555	0.524	0.5477	0.6517	0.5067
PIGV	1301	RI	4.2	4.1	4.3	0	1	0.1632	0.0217	1	0.9796	1	1	0.9808	1	0.8368	1	1	0.9515	1	1	1	0.9503	0.9747	1	1	0.9883	0.98	0.9614	1	1	1	0.9605	1	0.9878	1	1	0.9811	1	0.924	1	1	0.9907	1	0.9438	1	0.9038	0.9577	1
PIGV	1302	AD	2.3	2.2	3	0	0.8429	0.8536	0.2292	1	0.4617	0.4356	0.5456	0.706	1	1		0.1464	0.2858	1	1	0.2047	0.3626	0.2223	0.5884	1	0.7905	1	0.5072	1		1	1	0.3638	0.7267	0.2434		0.6317				1	0.8169	1	0.6536	1	0.7554	0.6904	1
PIGV	1303	AD	2.2:2.3	2.1	3	0	0.9267	0.9864	0.163	0.3826	0.1867	0.1341	0.2355	0.2981	0.4078	0.623			0.0898	0.5535	0.5853	0.1764	0.2038	0.121	0.2926	0.3826	0.2127	0.2664	0.2106	0.5793		0.2064	0.5393	0.3406	0.3692	0.2828		0.3355		0.1942		0.4357	0.4015	0.3719	0.1592	0.4126	0.7384	0.6738	0.3826
ZDHHC18	1305	AP	2			0	0.9791	0.3866	0.0236	0	0	0	0	0	0	0	0	0	0	0	0	0	0	0	0	0	0	0	0	0	0	0	0	0	0	0	0	0	0	0	0	0	0	0	0	0	0	0	0
ZDHHC18	1306	AP	1			0	0.9791	0.3866	0.0236	1	1	1	1	1	1	1	1	1	1	1	1	1	1	1	1	1	1	1	1	1	1	1	1	1	1	1	1	1	1	1	1	1	1	1	1	1	1	1	1
GPN2	1307	AP	1.1			0	0.9895	0.5873	0.0711	0.9537	0.9381	1	0.9062	0.9235	0.9221	0.968	0.9451	0.9206	0.8468	0.8974	0.9261	0.9194	0.9289	0.8745	0.9706	1	0.9702	0.9828	0.8165	0.7085	0.8516	0.9349	0.9183	0.8839	0.9458	0.9299	0.8635	0.8772	0.9046	0.7376	1	0.9084	0.9835	0.8966	0.8311	0.9527	0.9727	0.9392	0.9527
GPN2	1308	AP	3			0	0.9895	0.5873	0.0711	0.0463	0.0619	0	0.0938	0.0765	0.0779	0.032	0.0549	0.0794	0.1532	0.1026	0.0739	0.0806	0.0711	0.1255	0.0294	0	0.0298	0.0172	0.1835	0.2915	0.1484	0.0651	0.0817	0.1161	0.0542	0.0701	0.1365	0.1228	0.0954	0.2624	0	0.0916	0.0165	0.1034	0.1689	0.0473	0.0273	0.0607	0.0473
GPN2	1311	RI	1.2	1.1	1.3	0	0.9913	0.0263	0.0014	1	1	1	1	1	1	1	1	1	0.9882	1	1	1	1	1	1	1	1	1	1	1	1	1	1	1	1	1	1	1	1	1	1	1	1	1	1	1	1	1	1
SLC9A1	1312	AT	12			0	1	0.6824	0.0681	0.9795	0.8576	0.9482	0.915	0.9633	0.9499	0.942	0.959	0.9424	0.9357	0.8965	0.7861	0.9039	0.944	0.9564	0.9626	0.9907	0.9586	0.9151	0.9565	0.9051	0.9001	0.9494	0.8834	0.9686	0.9206	0.9529	0.9223	0.9527	0.9395	0.9279	0.925	0.8254	0.9737	0.9154	0.9649	0.9794	0.9632	0.949	0.901
SLC9A1	1313	AT	5.2			0	1	0.6824	0.0681	0.0205	0.1424	0.0518	0.085	0.0367	0.0501	0.058	0.041	0.0576	0.0643	0.1035	0.2139	0.0961	0.056	0.0436	0.0374	0.0093	0.0414	0.0849	0.0435	0.0949	0.0999	0.0506	0.1166	0.0314	0.0794	0.0471	0.0777	0.0473	0.0605	0.0721	0.075	0.1746	0.0263	0.0846	0.0351	0.0206	0.0368	0.051	0.099
SLC9A1	1314	ES	2	1	3	0	0.9983	0.2972	0.0164	0.9955	1	0.9819	0.9878	1	1	1	0.9837	1	1	1	1	1	1	1	0.9893	0.9923	0.9843	0.9915	1	1	1	1	0.9579	1	0.9724	1	1	1	1	0.7028	1	1	0.9907	1	0.9905	1	0.9904	1	1
WDTC1	1317	RI	16.2	16.1	16.3	0	1	0.0146	0.0011	1	1	1	1	1	1	1	1	1	1	1	1	1	1	1	1	1	1	1	1	1	1	1	1	1	1	1	1	1	1	1	1	1	1	1	1	1	1	1	1
WDTC1	1318	AA	15.1	14	15.2	0	1	0.1332	0.0215	0.954	0.9586	0.9844	0.9787	1	0.9562	0.8722	1	1	0.9395	0.9492	0.991	0.9849	0.9246	0.9683	0.9775	0.9426	0.9582	0.9476	0.9714	0.9552	1	0.989	0.9885	0.9917	0.9611	0.9712	1	0.9784	0.917	0.9602	1	1	0.9431	0.8984	0.9538	0.9799	0.9793	0.9676	0.9731
WDTC1	1319	AA	11.1	10	11.2	0	0.993	0.2562	0.0302	0.9675	0.9099	0.92	0.9561	1	0.9263	0.988	0.9514		0.9254	0.9381	0.9349	0.9546	0.941	0.9048	0.9389	0.9018	0.9805	0.9464	0.9434	0.9841	0.9018	0.9447	0.9362	0.9263	0.9785	0.9471	0.9427	0.9063	0.8823	1	0.7438	0.8856	0.9562	0.9598	0.9587	0.9254	0.9434	0.9728	0.8739
SYTL1	1320	AP	1			0	0.9965	1	0.1257	0.798	0.6996	0.8285	0.8158	0.9134	0.671	0	0.6909	0.8059	0.7214	0.6704	0.6582	0.7975	0.7609	0.8697	0.8275	0.832	0.8552	0.8724	0.8143	0.7376	0.686	0.8742	0.7772	0.7529	0.7301	0.862	0.7446	0.7153	0.8023	0.8712	0.8739	0.8998	0.9745	0.9507	0.9627	0.8123	1	0.8895	0.7972
SYTL1	1321	AP	2.1			0	0.9965	1	0.1257	0.202	0.3004	0.1715	0.1842	0.0866	0.329	1	0.3091	0.1941	0.2786	0.3296	0.3418	0.2025	0.2391	0.1303	0.1725	0.168	0.1448	0.1276	0.1857	0.2623	0.314	0.1258	0.2228	0.2471	0.2699	0.138	0.2554	0.2847	0.1977	0.1288	0.1261	0.1002	0.0255	0.0493	0.0373	0.1877	0	0.1105	0.2028
SYTL1	1322	AA	6.1	5	6.2	0	0.9808	0.3686	0.0548	0.9268	0.8613	0.9575	0.9297	0.8949	0.9537		0.9292	0.9265	0.8442	0.8196	0.931	0.8844	0.8713	0.8702	0.9756	0.9664	0.898	0.9298	0.9781	1	0.9126	0.8035	0.9455	0.8737	0.9032	0.8578	0.9466	0.9389	0.8268	0.9022	0.8019	0.8427	0.8817	0.7116	0.9176	0.8841		0.8429	0.8502
MAP3K6	1323	ES	3	2	4	0	0.9337	0.8299	0.1584	0.8397	0.7021	0.7857	0.8462	0.5882	0.7021	0.825	0.6471		0.9041	0.44	0.5816	0.5544	0.9199	0.7971	0.3514	0.5974	0.4883	0.728		0.6111	0.7586	0.6111	0.6627	0.7021	0.3595	0.6971	0.6471	0.5957	1				0.5934	0.6024	0.7407		0.8648		0.6714
MAP3K6	1324	RI	1.2	1.1	1.3	0	0.9197	0	0	1	1	1	1	1	1	1	1		1	1	1	1	1	1	1	1	1	1	1	1		1	1	1	1	1	1	1	1				1	1	1	1	1		1
FCN3	1325	ES	4	3	5	0	0.8517	0.5789	0.0702	0.8929		0.8777	0.9065	0.7105		0.4211	0.9314	0.9632		1	0.8812		0.9083	0.8325	0.9106		0.8675	0.9255		1	1		0.9588		0.8533	0.7556	1	0.9043	0.7591	0.8406	0.919		0.8889	0.9547	0.8675	0.8479	0.8791	0.9588
CD164L2	1326	AT	3.4			0	0.904	0.1717	0.0082	0	0	0	0		0	0	0	0	0	0	0	0	0	0	0	0	0	0		0	0	0	0		0	0	0	0	0	0	0		0	0	0	0		0
CD164L2	1327	AT	4.3			0	0.904	0.1717	0.0082	1	1	1	1		1	1	1	1	1	1	1	1	1	1	1	1	1	1		1	1	1	1		1	1	1	1	1	1	1		1	1	1	1		1
CD164L2	1328	RI	4.2	4.1	4.3	0	0.9284	0.8432	0.2033	0.743	0.7461	0.6444	0.6452		0.7966	1	0.8023	0.5036	0.913	0.8727	0.8263	0.9038	1	0.7519	0.7068	0.4533	0.4564	0.8903		0.3164	0.5087	0.7966	0.3544		0.8197	0.5138	0.662	0.6267	0.7351	0.6595	1	1	0.8792	0.4405	0.4625	0.8174		0.5596	1
WASF2	1330	ES	8	7	9	0	1	0.0485	0.0043	1	1	1	1	1	1	1	1	1	0.9903	1	1	1	1	1	1	1	1	1	1	1	1	1	1	1	1	1	1	0.9848	1	1	1	0.9515	1	1	1	1	1	1	1
AHDC1	1331	ES	00:03:04.100000	2	4.2	0	0.822	1	0.2284	0.2508	0.6017	0.2785	0.5261	0.654	0.6117	0.1889			0.5577	1		0.6243	0.6262	1	0.1934	0.2958	0.5002	0.7878	0.718			1	0.2028	0.5176	0.2013	0.2272		0.7307	0.5268				0.5398	0.3054	1		0.5772		0.3865
FGR	1332	AP	3			0	0.8743	0.7786	0.105	0.2036	0.2035	0.1205	0.3783	0.5181	0.0618	0.0252	0.1689		0.2356		0.1602	0.3217	0.1245	0.143	0.1011		0.2458	0.1812	0.2145			0.1173	0.4634	0.1872		0.069		0.162					0.0708	0.2874	0.1185		0.0564	0.4848	0.1129
FGR	1333	AP	5.1			0	0.8743	0.4582	0.0578	0.0317	0.0393	0.0375	0	0	0	0	0.0456		0.0734		0.0309	0	0.0841	0	0		0	0.0489	0.0827			0.1188	0.0626	0.0583		0		0.1094					0.0956	0	0		0	0	0.1524
FGR	1334	AP	1			0	0.8743	0.9439	0.1486	0.6918	0.6219	0.7413	0.5629	0.4819	0.7466	0.9358	0.7855		0.691		0.7023	0.4786	0.6948	0.7091	0.8465		0.7542	0.6573	0.6553			0.7638	0.474	0.6874		0.7703		0.6028					0.8337	0.7126	0.8815		0.9436	0.5152	0.7347
FGR	1335	AP	2			0	0.8743	0.6093	0.094	0.0729	0.1354	0.1007	0.0587	0	0.1917	0.039	0		0		0.1066	0.1997	0.0966	0.1479	0.0523		0	0.1125	0.0475			0	0	0.067		0.1607		0.1257					0	0	0		0	0	0
FGR	1336	ES	7.2:8	7.1	9	0	0.9948	0.2131	0.0102	1	1	1	0.9762	1	1	1	1	1	1	1	1	1	1	1	1	1	0.9644	1	1	1	1	1	1	1	1	1	1	1	1	1	1	1	1	1	1	1	1	1	1
IFI6	1337	AD	2.3	2.2	3	0	0.9703	0.4231	0.0625	0.1259	0.1317	0.2556	0.2335	0.3421	0.2042	0.1549	0.0991	0.1691	0.2406		0.2464	0.4186	0.1816	0.1663	0.1803		0.122	0.2161	0.142	0.1416	0.1984	0.198	0.2089	0.2089	0.2056	0.1344	0.2424	0.2167	0.2537	0.1367	0.142		0.1992		0.1988	0.2904	0.1379	0.1867	0.2604
IFI6	1338	AD	2.2:2.3	2.1	3	0	0.993	0.1788	0.0194	0.0322	0.0457	0.0497	0.0497	0.1237	0.0454	0.0767	0.0247	0.0442	0.0766	0	0.0609	0.0909	0.0461	0.0467	0.0432	0	0.025	0.0446	0.05	0.0279	0.047	0.0402	0.0426	0.0443	0.056	0.0359	0.0519	0.0715	0.0693	0.0358	0.0527	0	0.0493	0	0.0439	0.0827	0.0243	0.0476	0.057
IFI6	1339	AD	2.2	2.1	3	0	0.9983	0.416	0.0351	0.1948	0.2437	0.1528	0.1515	0.2222	0.1666	0.3086	0.1889	0.1979	0.2189	0.2009	0.176	0.1328	0.1882	0.2097	0.1814	0.0848	0.1732	0.1587	0.2475	0.165	0.1752	0.1576	0.1584	0.1627	0.1987	0.1958	0.1569	0.2357	0.1846	0.2004	0.2491	0.2273	0.1862	0.145	0.1688	0.1918	0.156	0.1928	0.1508
FAM76A	1340	AT	10			0	1	0.327	0.0572	0.9239	0.9079	0.8786	0.8449	0.9665	0.9109	1	0.8846	0.9801	0.8677	0.8558	0.8905	0.8108	0.9298	0.9306	0.8594	0.8478	0.8258	0.9154	0.9423	0.7821	0.8399	0.8325	0.8315	0.8351	0.8185	0.9192	0.9219	0.7535	0.9139	0.9213	0.933	0.9473	0.9704	0.9621	0.9396	0.9124	1	1	0.8718
FAM76A	1341	AT	9.2			0	1	0.327	0.0572	0.0761	0.0921	0.1214	0.1551	0.0335	0.0891	0	0.1154	0.0199	0.1323	0.1442	0.1095	0.1892	0.0702	0.0694	0.1406	0.1522	0.1742	0.0846	0.0577	0.2179	0.1601	0.1675	0.1685	0.1649	0.1815	0.0808	0.0781	0.2465	0.0861	0.0787	0.067	0.0527	0.0296	0.0379	0.0604	0.0876	0	0	0.1282
FAM76A	1342	ES	7	6	8	0	0.9948	0.57	0.1011	0.7458	0.8429	0.6734	0.8691	1	0.7402	0.8073	0.7586		0.8469	0.5498	0.8231	0.7788	0.7642	0.6762	0.7788	0.743	1	0.9193	0.9235	0.8953	0.5896	0.8806	0.8244	0.8651	0.8122	0.949	0.7154	0.5308	1	0.7154	0.5525	0.7677	0.7227	0.8341	0.9067	0.9153	0.6167	1	0.9096
FAM76A	1343	ES	5	4	6	0	0.9983	0.1636	0.0181	1	1	0.9509	0.957	1	1	1	1	1	1	1	1	1	0.9736	1	1	1	1	1	0.9212	1	1	1	1	1	1	1	1	1	1	1	1	1	1	1	1	1	1	1	1
FAM76A	1344	ES	3	2	4	0	0.9895	0.8581	0.1606	0.305	0.3537	0.4294	0.5264	0.3667	0.6708	0.5815	0.496	1	0.7354	0.5815	0.6931	0.6091	0.6411	0.386	0.492	0.2486	0.3758	0.2761	0.6494	0.6136	0.5009	0.7407	0.6099	0.305	0.6045	0.7554	1	0.6494	0.6837	0.5602	0.7664	0.626	0.1946	0.3461	0.5166	0.4099	0.3165	0.6708	0.5675
PPP1R8	1345	ES	4	3	5	0	1	0.0553	0.0075	0.9788	0.9935	0.9915	0.9846	1	1	1	1	1	1	1	1	1	1	1	1	1	0.995	0.9899	1	0.9937	1	0.9803	0.9887	1	1	0.9916	1	1	1	1	1	0.9914	0.997	1	0.9912	1	1	1	1
PPP1R8	1347	AD	1.2:1.3	1.1	2	0	0.9913	0.7962	0.0848	0.1049	0.1748	0.1285	0.1152	0.0963	0.0466	0.7621	0.2698		0.2619	0.0788	0.2016	0.0773	0.1111	0.1702	0.0667	0.0725	0.221	0.2097	0.225	0.0448	0.0229	0.1203	0.0078	0.0913	0.1267	0.0926	0.2067	0.2942	0.2559	0.2236	0.2031	0.1263	0.1665	0.0209	0.1181	0.2423	0.2991	0.1495	0.1528
PPP1R8	1348	AD	1.2	1.1	2	0	0.9581	0.3527	0.0572	0.0844	0	0.0534	0.1024	0	0.0242		0		0.0591	0.0744	0	0.0724	0.0633	0	0.0687	0.0523	0	0.0635	0	0.0419	0.0098	0.2714	0.1065	0	0	0.0346		0		0		0.0697	0.0263	0.1193	0.1243	0	0.1501	0.1202	0.1209
THEMIS2	1349	RI	4.2	4.1	4.3	0	0.9983	0.0909	0.0134	0.9936	1	0.9881	0.9839	1	0.9643	1	1	1	1	1	1	1	0.9895	1	0.9683	1	1	0.987	1	1	1	1	1	1	0.9544	1	1	1	1	1	1	1	1	1	1	0.9384	1	1	1
THEMIS2	1350	ES	4.1:4.2:4.3	3	5	0	1	0.1853	0.0281	0.9193	0.9871	1	1	0.9733	1	0.9808	0.8913	1	0.9911	1	0.9469	0.9685	0.9903	0.9846	1	1	0.9876	0.9839	0.9859	1	1	1	0.9829	0.9753	1	0.9357	0.9508	0.8855	1	0.9399	0.9396	1	0.9219	0.9218	0.9917	0.9848	0.9085	0.9634	1
THEMIS2	1352	ES	3:4.1:4.2:4.3	2	5	0	1	0.3129	0.0531	0.9149	0.9395	0.9627	0.9783	0.8648	0.8589	0.9087	0.8031	0.7217	0.9337	0.9538	0.8806	0.9024	0.9717	0.9679	0.9723	1	0.948	0.975	0.9316	1	1	0.978	0.9667	0.9313	0.8989	0.7521	1	0.9335	1	0.892	0.8733	1	0.787	0.8161	0.9822	0.9688	0.8407	0.8073	0.9761
THEMIS2	1354	ES	3	2	5	0	0.7906	1	0.207	0.6247	0.3537			0.2666	0	0.1935	0.3794		0.1849		0.428	0.3925	0.4542	0.4983			0.3468	0.5615	0.3266				0.467	0.396		0.3405	1	0.8171		0.4737	0.497	1	0.3569	0.3822	0.4839	0.5276	0.453	0.2183
RPA2	1357	RI	1.3	1.2	1.4	0	0.9878	0.4118	0.0285	0	0.0059	0.04	0.0135	0	0.0448	0.0051	0.0249	0.0476	0.1008	0.0303	0.037	0.0318	0.0273	0.007	0.0061	0	0.0159	0.0326	0.0413	0.0216	0.0435	0.0336	0.0145	0.0061	0.0071	0.0055	0	0.044	0.0222	0.0164	0.0328	0.0184	0	0	0.0034	0	0	0.004	0.0435
RPA2	1359	AD	1.2	1.1	1.4	0	0.9983	0.1532	0.0146	1	1	0.9642	1	1	1	0.9872	1	1	1	1	0.9769	1	0.992	1	1	1	1	1	1	1	1	1	1	1	0.9801	1	1	1	1	0.9829	1	0.977	0.994	0.9842	1	0.984	1	0.9869	1
SMPDL3B	1360	AT	7.2			0	1	0.5541	0.0948	0.1742	0.2226	0.289	0.3047	0.1852	0.1492	0.0572	0.2228	0.1015	0.3604	0.3489	0.2316	0.2058	0.1393	0.1529	0.2019	0.237	0.3443	0.3082	0.2773	0.425	0.0997	0.3044	0.1421	0.1646	0.2465	0.1727	0.1802	0.2662	0.2595	0.1852	0.2333	0.2858	0.0671	0.124	0.3509	0.2573	0.4964	0.2421	0.3927
SMPDL3B	1361	AT	8			0	1	0.5541	0.0948	0.8258	0.7774	0.711	0.6953	0.8148	0.8508	0.9428	0.7772	0.8985	0.6396	0.6511	0.7684	0.7942	0.8607	0.8471	0.7981	0.763	0.6557	0.6918	0.7227	0.575	0.9003	0.6956	0.8579	0.8354	0.7535	0.8273	0.8198	0.7338	0.7405	0.8148	0.7667	0.7142	0.9329	0.876	0.6491	0.7427	0.5036	0.7579	0.6073
SMPDL3B	1362	ES	4	3.2	5	0	1	0.0215	0.0016	1	1	1	0.9953	0.9981	1	1	1	1	1	1	1	1	0.9985	1	1	1	1	1	1	1	1	1	1	1	1	1	1	1	1	1	1	1	0.9987	1	1	1	1	1	1
SMPDL3B	1363	AA	3.1	2	3.2	0	0.9808	0.3563	0.0362	0.024		0.0419	0.0573	0.0425	0.0175	0.0388	0	0.0243	0.0592	0.0356	0.0751	0.1242	0.0303	0.0094	0.0764	0.0479	0.0408	0.0475	0.0432	0	0.0486	0.0163	0.0343	0.0185	0.0245	0.0292	0.0245	0.0059	0.0479	0.0103	0.0694	0.074	0.013	0.0363	0.0392	0.0074		0.0192	0.0758
EYA3	1366	AT	18			0	1	0.2837	0.0318	0.0389	0.024	0.0112	0.031	0	0.0673	0.0812	0	0.081	0.0404	0.0641	0.0447	0.0526	0.0307	0.0258	0.0518	0.0513	0.0123	0.0196	0.0092	0.0522	0.0513	0.0337	0.0092	0.0066	0.0297	0	0	0.0186	0.1514	0	0.0466	0.0866	0.0308	0.0194	0.0076	0.0138	0	0	0
EYA3	1367	AT	19			0	1	0.2837	0.0318	0.9611	0.976	0.9888	0.969	1	0.9327	0.9188	1	0.919	0.9596	0.9359	0.9553	0.9474	0.9693	0.9742	0.9482	0.9487	0.9877	0.9804	0.9908	0.9478	0.9487	0.9663	0.9908	0.9934	0.9703	1	1	0.9814	0.8486	1	0.9534	0.9134	0.9692	0.9806	0.9924	0.9862	1	1	1
EYA3	1368	AA	10.1	9	10.2	0	0.7923	0.0859	0.0072	1	1	1	1						1		1	1	1	1	1		1	0.9721	1	1		1		0.9617		1		1		1		1	1		1	1	1		1
EYA3	1369	ES	7	6	8	0	0.9424	0.9204	0.133	0.3555	0.5388	0.4378	0.5768	0.5266		0.8579	1		0.4877	0.4053	0.4165	0.4725	0.3875	0.5216	0.3244	0.2803	0.5003	0.4691	0.5648	0.4378		0.5388	0.3528	0.4073	0.6607	0.3574	0.3936	0.4378	0.3417				0.5015	0.4378	0.4933	0.4549	0.6314		0.609
EYA3	1370	ES	06:07:00	5	8	0	0.918	0.3498	0.0209	1	1	1	1	1		1	1		1	1	1	1	1	1	1	1	1	1	1	1		1	1	1	1	1		1	1			1	1	1	1	1	1		1
EYA3	1371	ES	6	5	8	0	0.9721	0.1224	0.0068	1	1	1	1	1	1	1		1	1	1	1	1	1	1	1	1	1	1	1	1		1	1	1	1	1	1	1	1	1	1	1	1	1	1	1	1		1
EYA3	1372	ES	4	3	5	0	0.9511	0.5339	0.0491	1	1	0.9602	1	0.9202	1	0.9437	1		1	1	1	0.9402	1	1	0.9731	0.872	1	0.9589	1	0.961		1	0.9129	0.9072	1	1		1	0.8397			1	0.9362	1	0.9544	1	1	0.6576	0.8963
EYA3	1374	ES	3	2	4	0	0.8831	0.0692	0.0033	1	1	1	1	1			1		1	1	1	1	1	1	1		1	1	1	1		1	1	1	1	1		1				1	1	1	1	1	1		1
ATPIF1	1378	AT	3			0	1	0.1186	0.0141	0.0141	0.0319	0.0362	0.0315	0.0069	0.0104	0.0089	0.0099	0.0067	0.0234	0.014	0.0245	0.0412	0.0274	0.0087	0.016	0.0052	0.0137	0.0121	0.0228	0.0323	0.0116	0.0234	0.0478	0.0219	0.0217	0.0188	0.0177	0.0192	0.0208	0.0032	0.0117	0.0139	0.0055	0.0119	0.004	0.0105	0.0025	0.0082	0.0511
ATPIF1	1379	AT	2.4			0	1	0.1186	0.0141	0.9859	0.9681	0.9638	0.9685	0.9931	0.9896	0.9911	0.9901	0.9933	0.9766	0.986	0.9755	0.9588	0.9726	0.9913	0.984	0.9948	0.9863	0.9879	0.9772	0.9677	0.9884	0.9766	0.9522	0.9781	0.9783	0.9812	0.9823	0.9808	0.9792	0.9968	0.9883	0.9861	0.9945	0.9881	0.996	0.9895	0.9975	0.9918	0.9489
ATPIF1	1380	RI	2.2	2.1	2.3	0	1	0.732	0.1138	0.9189	0.9869	0.8305	0.9149	0.749	0.9658	0.6952	0.9346	0.5038	0.9465	0.8594	1	0.9569	0.8435	0.893	0.9442	0.8054	0.724	0.9594	0.8539	0.8022	0.9342	0.8434	0.9154	0.8473	0.9719	0.8591	0.8696	1	0.8218	0.6334	0.785	0.7678	0.6994	0.7797	0.8248	0.9937	0.6747	0.6713	0.9767
ATPIF1	1381	RI	2.2:2.3	2.1	2.4	0	1	0.7312	0.0793	0.1045	0.3666	0.1243	0.1799	0.0634	0.1011	0.0603	0.1975	0.0347	0.1771	0.1315	0.1889	0.2748	0.05	0.0941	0.1478	0.0897	0.0624	0.212	0.157	0.1356	0.076	0.1444	0.0674	0.137	0.2248	0.1072	0.0854	0.0673	0.1051	0.0253	0.081	0.0646	0.0698	0.1327	0.1041	0.3177	0.0521	0.0326	0.1917
ATPIF1	1382	AA	2.3	2.1	2.4	0	1	0.2011	0.0194	0.0123	0.0084	0.0352	0.022	0.0321	0.0058	0.0438	0.0251	0.0575	0.013	0.032	0	0.0193	0.0128	0.0183	0.011	0.0337	0.0319	0.0129	0.0391	0.0466	0.0096	0.0454	0.0079	0.033	0.0103	0.0263	0.0216	0	0.0392	0.0299	0.0373	0.0272	0.036	0.0485	0.0386	0.0033	0.0344	0.0332	0.0063
MED18	1383	RI	3.2	3.1	3.3	0	1	0.0438	0.008	1	0.9793	0.9883	1	1	1	1	0.9877	1	1	0.9915	1	0.9823	1	0.9805	1	0.9673	0.9889	1	0.9926	1	1	0.9907	1	1	0.9748	1	0.9775	0.9896	0.979	1	1	1	0.9922	1	1	0.9857	1	0.9929	1
PHACTR4	1384	AP	1			0	0.9634	0.986	0.165	0.805	0.9217	0.503	0.8723	0.8068	0.8039	0.5616	0.7873		0.3279	0.8416	0.7555	0.9167	0.5755	0.7489	0.82	0.9011	0.7522	0.7197	0.5726	0.5324		0.4235	0.7579	0.4767	0.4767	0.7265		0.8547	0.3489				0.7833	0.4869	0.5694	0.9228	0.7192	0.7915	1
PHACTR4	1385	AP	3			0	0.9634	0.986	0.165	0.195	0.0783	0.497	0.1277	0.1932	0.1961	0.4384	0.2127		0.6721	0.1584	0.2445	0.0833	0.4245	0.2511	0.18	0.0989	0.2478	0.2803	0.4274	0.4676		0.5765	0.2421	0.5233	0.5233	0.2735		0.1453	0.6511				0.2167	0.5131	0.4306	0.0772	0.2808	0.2085	0
RCC1	1386	AP	1			0	1	0.8375	0.1532	0.7066	0.6573	0.8215	0.7524	0.5888	0.6477	0.8862	0.4297	0.9392	0.5925	0.5909	0.6488	0.8483	0.6426	0.3803	0.7941	0.9012	0.6078	0.7226	0.7737	0.9386	0.9878	0.8124	0.8956	0.7498	0.8419	0.822	0.9176	0.6607	0.9217	0.6533	0.8647	0.9507	0.3804	0.8929	0.3328	0.8328	0.813	0.7674	0.9149
RCC1	1387	AP	5			0	1	0.8375	0.1532	0.2934	0.3427	0.1785	0.2476	0.4112	0.3523	0.1138	0.5703	0.0608	0.4075	0.4091	0.3512	0.1517	0.3574	0.6197	0.2059	0.0988	0.3922	0.2774	0.2263	0.0614	0.0122	0.1876	0.1044	0.2502	0.1581	0.178	0.0824	0.3393	0.0783	0.3467	0.1353	0.0493	0.6196	0.1071	0.6672	0.1672	0.187	0.2326	0.0851
RCC1	1388	ES	7	6	8	0	0.9913	0.9716	0.1241	0.4114	0.0471	0.4441	0.3899	0.3349	0.6604	0.0284	0.2313	0.1395	0.1575	0.2672	0.2416	0.4089	0.4589	0.2505	0.4147	0.493	0.2905	0.2326	0.1519	0.1766		0.2779	0.3475	0.3549	0.3147	0.3219	0.3271	0.1892	0.1754	0.2331	0.1332	0.1079	0.2202	0.1745	0.3417	0.189	0.11	0.3956	0.3018
TAF12	1389	AD	1.2	1.1	2	0	1	0.453	0.0477	0.0046	0.1324	0.0578	0.0276	0.0319	0.0772	0.0233	0.0765	0.0363	0.0646	0.1584	0.0728	0.0371	0.051	0.0525	0.0646	0.0203	0.0924	0.0733	0.0418	0.0453	0.0621	0.1502	0.0312	0.0537	0.0898	0.0452	0.0794	0.0743	0.2262	0.1175	0.0549	0.1011	0.0492	0.0306	0.0368	0.1715	0.0351	0.0398	0.0141
GMEB1	1390	AA	3.1	2.2	3.2	0	0.8168	1	0.1513	0.1991	0.5108	0.6654	0.6509	0.4531		0.2422			0.4825	0.3737	0.6266	0.528	0.3049	0.2716	0.3833		0.3516	0.3353	0.3737	0.2716		0.6911		0.3405	0.4272	0.5158		0.2185					0.2716	0.3737	0.4272	0.1991	0.2422
YTHDF2	1394	ES	2	1.3	3	0	1	0.0585	0.008	0.9832	1	0.9829	1	1	1	1	1	1	1	1	1	1	1	1	1	1	1	1	0.9844	1	1	1	0.9915	1	1	1	1	1	1	1	1	1	0.9956	0.9853	1	1	1	1	1
YTHDF2	1395	RI	1.2	1.1	1.3	0	0.9599	0.0886	0.0098	1	1	1	1	0.9458	1	1	1	1	1	0.9434	1	0.9644	1	1	1	1	1	1	1	1	1	1	1	1	1	1	1	1	1	1			1	1	1	1	1	1	1
EPB41	1396	AP	2			0	0.8778	0.5516	0.0605	0.0615	0.0177	0	0	0	0.2625	0.0331	0.2883		0	0.0289	0.064	0.075	0.0496	0	0	0	0	0.0119	0.0555	0		0	0	0.0572	0	0	0	0					0	0	0.0443	0			0
EPB41	1397	AP	3			0	0.8778	0.778	0.1123	0.0926	0.4487	0.0838	0.1069	0.163	0.2109	0	0.0744		0.0655	0.0522	0.3857	0.2484	0.0224	0.091	0.0144	0	0.1016	0.3358	0.1337	0.226		0.0396	0.0806	0.1552	0.0323	0.0806	0.0806	0.0477					0.0117	0	0.08	0.144			0.3753
EPB41	1398	AP	1			0	0.8778	0.778	0.125	0.8459	0.5335	0.9162	0.8931	0.837	0.5266	0.9669	0.6373		0.9345	0.9189	0.5503	0.6766	0.928	0.909	0.9856	1	0.8984	0.6524	0.8108	0.774		0.9604	0.9194	0.7875	0.9677	0.9194	0.9194	0.9523					0.9883	1	0.8757	0.856			0.6247
EPB41	1399	AT	19.2			0	1	0.082	0.0108	0.015	0.0034	0.0075	0.0164	0.0274	0.0084	0	0	0	0.0063	0	0	0	0.0199	0	0.0076	0	0	0.0033	0.0041	0.0063	0	0	0	0	0.004	0	0.0071	0.0068	0.0143	0	0	0	0.0228	0.0151	0.0212	0.0069	0.0349	0.0285	0
EPB41	1400	AT	24			0	1	0.082	0.0108	0.985	0.9966	0.9925	0.9836	0.9726	0.9916	1	1	1	0.9937	1	1	1	0.9801	1	0.9924	1	1	0.9967	0.9959	0.9937	1	1	1	1	0.996	1	0.9929	0.9932	0.9857	1	1	1	0.9772	0.9849	0.9788	0.9931	0.9651	0.9715	1
EPB41	1401	ES	21	20	22	0	1	0.1799	0.0187	1	0.9515	0.988	0.9838	0.9778	1	1	1	1	0.9794	0.985	0.9915	0.9756	0.9817	0.9666	0.9898	1	0.9667	0.9884	0.9915	0.9701	1	0.992	1	0.9769	0.991	0.9729	1	0.9516	1	1	1	1	0.9829	0.9755	1	0.9889	0.9296	1	1
EPB41	1403	ES	20	19.1	21	0	0.9983	0.2356	0.0269	0.9706	0.9481	0.9254	0.9692	0.9815	0.9439	1	0.9477	1	0.9852	0.9906	0.99	1	0.9745	0.9628	0.971	0.9697	0.951	0.9896	0.9345	0.9475	0.7644	1	0.9854	0.9544	0.987	0.9627	1	0.9705	1	1	1	1	0.9797	1	0.9723	0.9317	1	1	0.9505
EPB41	1410	ES	16:17:18	15	19.1	0	0.7522	1	0.1907	0.0348	0.6257	0.2004	0.0388			0.0767	0.1531		0.6564		0.1397	0	0.2018	0			0	0.1367	0.2065	0.1618				0.0642	0.7704				0.3789				0.102		0.0354			0	0.3009
EPB41	1411	ES	16:18:00	15	19.1	0	0.8691	1	0.2651	0.0876	0.7307	0.074	0.5292			0.6689	0.5159		0.9115	0.8872	0.4536	0.4678	0.5151	0.6621	0.7252		0.345	0.6764	0.5832	0.3377		0.894		0.1334	0.6517	0.5623		0.5501	0.2952				0.4539	0.7362	0.1496	0.68	0.7422	0.3286	0.3664
EPB41	1412	ES	18	15	19.1	0	0.9284	1	0.2294	0.2197	0.6069	0.4009	0.4941	0.8611	0.6813	0	0.7418		0.698	0.8695	0.6324	0.6147	0.8099	0.7874	0.8792	0.6953	0.5775	0.8448	0.8535	0.4757		0.8796	0.6889	0.1481	0.7057	0.6194	1	0.3385	0.3647				0.6602	0.8846	0.5327	0.7651	0.8176	0.1129	0.5292
EPB41	1413	ES	16	15	19.1	1	0.7766	0.8431	0.2028	0.2098	0.5705	0.4625	0.4852	0.8376	0.6914	0.829	0.5697		0.8491	0.8747	0.3799		0.789	0.7146	0.8901	0.7906	0.5766	0.7852	0.761	0.5706		0.8949	0.5718	0.3864	0.691	0.732							0.8156	0.6947	0.5598	0.744			0.2261
EPB41	1414	ES	7	6	8	0	0.9756	0.2742	0.0296	0.941	0.9685	1	0.9858	1	1	1	0.9112		1	1	1	1	0.9893	0.9431	0.9884	0.9554	0.9736	0.9832	1	0.9359	1	1	1	0.9694	1	1	1	1	1				0.974	1	1	0.9178	0.9426	1	0.9349
EPB41	1415	ES	5	4.2	6	0	0.815	0.3438	0.0254	0	0	0.0233	0.0126	0	0		0		0	0	0.019	0	0	0	0		0	0	0	0		0	0	0	0			0					0	0	0	0	0		0
SRSF4	1422	ES	08:09:00	7	10	0	1	0.0092	0.001	1	1	1	1	1	1	1	1	1	1	1	0.995	0.9952	1	0.9952	1	1	1	1	1	1	1	1	1	1	1	1	1	1	1	1	1	1	1	1	1	1	1	1	1
SRSF4	1424	ES	6	5	7	0	1	0.8297	0.1099	0.1183	0.0619	0.0663	0.2252	0.1097	0.1856	0.0737	0.0876	0.2505	0.1295	0.2082	0.2823	0.4006	0.2456	0.104	0.0849	0.2237	0.0674	0.1589	0.2162	0.2582	0.1631	0.3548	0.3555	0.1597	0.3156	0.1808	0.431	0.3147	0.3712	0.1684	0.1175	0.1797	0.038	0.0383	0.1079	0.0413	0.0439	0.0285	0.1241
SRSF4	1425	ES	02:03:04	1	5	0	1	0.9984	0.166	0.4425	0.2489	0.3362	0.4705	0.2431	0.3967	0.4854	0.2809	0.5276	0.4556	0.6163	0.3725	0.5475	0.4028	0.2731	0.2873	0.5831	0.3129	0.3648	0.3201	0.2818	0.6864	0.3803	0.4564	0.3392	0.4965	0.4368	0.6848	0.461	0.7445	0.4332	0.5979	0.1746	0.1136	0.4193	0.2331	0.1653	0.0192	0.2965	0.4939
MECR	1426	AA	2.1	1	2.2	0	0.993	0.9072	0.1152	0.3486	0.3804	0.3715	0.3779	0.3601	0.5442	0.1407	0.3677	0.2403	0.3923	0.2467	0.3914	0.3334	0.4018	0.4785	0.2576	0.3531	0.222	0.4535	0.2076	0.3313	0.3385	0.4142	0.1853	0.3006	0.2653	0.2964	0.2037	0.3624	0.4142	0.3153	0.2439	0.3774	0.3385	0.4194	0.3942	0.2294	0.3165	0.4392	0.5889
PTPRU	1427	AA	31.1	30	31.2	0	0.9668	0.1324	0.0134	1	1	0.987	0.9947	1	1	1	1	1	1	0.9605	1	0.9869	0.9915	1	0.9948	1	0.9667	0.9971	1	0.9915	1	1	0.9879	0.9791	1	0.9915		0.9667	1	1	1		0.992	0.9913	1	1	0.9922	1	1
PTPRU	1428	AD	23.2	23.1	24	0	0.9389	0.5773	0.0884	0.6533	0.4331	0.6334	0.7659	0.6113	0.5142	0.7552	0.694		0.6747	0.7605	0.7075	0.6662	0.6352	0.5672	0.6027	0.5616	0.5412	0.6957	0.6173	0.4757	0.6447	0.452	0.683	0.6315	0.4305	0.7269		0.7728	0.7313				0.7047	0.6983	0.6884	0.7605	0.6194	0.784	0.864
PTPRU	1430	ES	21	19	22	0	0.911	0.0767	0.0058	0	0	0	0	0	0		0	0	0	0	0	0	0	0	0	0.0493	0	0	0	0	0	0	0	0	0	0.0315		0	0				0	0	0	0	0	0	0
PTPRU	1431	ES	20	19	22	0	0.911	0.0702	0.0035	0	0	0	0	0	0		0	0	0	0	0	0	0	0	0	0	0	0	0	0	0	0	0	0	0	0		0	0				0	0	0	0	0	0	0
PTPRU	1432	ES	15	14	16	0	0.9023	0.7885	0.0606	0	0.4923	0	0	0	0	0			0	0	0	0	0	0	0	0	0	0.0025	0	0	0	0	0	0	0	0		0	0				0.0033	0	0		0.0087	0
SDC3	1436	RI	2.2	2.1	2.3	0	0.9825	1	0.0886	0.0631	0.1023	0.0671	0.0756	0.0719	0.1751	0.0693	0.14		0.2381	0.3814	0.1459	0.1634	0.0867	0.0617	0.0924	0.0223	0.05	0.1328	0.1308	0.1246		0.2344	0.1278	0.108	0.233	0.0873	0.1634	0.1528	0.1208	0.0561		0.4111	0.0402	0.013	0.0349	0.0665	0.0227	0.0867	0.1023
PUM1	1443	AD	18.2	18.1	19	0	0.9965	0.4926	0.0725	0.522	0.4996	0.5613	0.4495	0.5122	0.4533	0.347	0.5414	0.7374	0.4471	0.4783	0.543	0.4234	0.4652	0.4317	0.3899	0.5552	0.473	0.4429	0.4835	0.4282		0.5279	0.5046	0.4204	0.4452	0.5516	0.5749	0.4835	0.5113	0.3188	0.4545	0.5102	0.5049	0.6135	0.4594	0.4724	0.3743	0.5749	0.4007
PUM1	1445	AA	14.1	13	14.2	0	0.9965	0.4747	0.0634	0.8638	0.7066	0.8027	0.7884	0.7925	0.7713	0.607	0.8092		0.8724	0.8096	0.8075	0.8024	0.77	0.6981	0.8861	0.8024	0.8508	0.71	0.849	0.7641	1	0.9336	0.7396	0.8496	0.8967	0.8963	0.8433	0.8082	0.7412	0.8985	0.9045	0.8939	0.871	0.7877	0.8135	0.8587	0.7874	0.765	0.868
PUM1	1446	ES	13	12	14.1	0	0.9983	0.1018	0.0098	1	0.979	1	1	1	0.9711	0.9934	1	1	1	1	1	1	0.9914	1	1	1	1	1	1	1	1	1	1	1	1	1	1	1	1	1	1	1	1	1	1	1	1	1	1
PUM1	1447	AA	10.1	9	10.2	0	0.9215	0.8186	0.1116	0.6171	0.4916	0.3438	0.3739	0.2508	0.4916	0.1904	0.293		0.2227	0.3792	0.4161	0.3523	0.4834	0.4161	0.3888	0.2789	0.3647	0.3821	0.4916	0.4781		0.7267	0.4204	0.4622	0.4678	0.3672		0.3128					0.344	0.392	0.4773	0.4744	0.3849		0.3128
PUM1	1448	ES	06:07:08	5	9	0	0.9983	0.1034	0.0056	1	1	1	1	1	1	1	1		1	0.9897	1	1	1	0.9886	0.9938	1	1	1	1	1	1	1	1	1	1	1	1	1	1	1	1	1	1	1	1	1	1	1	1
PUM1	1449	ES	5:6:7:8	4	9	0	0.9983	0.1561	0.0181	0.9766	0.9872	1	0.9842	0.9908	0.9025	1	0.9768		0.9781	0.9294	0.9829	0.9899	0.9795	0.966	0.9938	0.976	0.994	0.9874	1	0.9915	1	1	0.981	0.9642	1	0.9402	1	0.9598	0.9755	0.8439	1	0.8535	0.9733	0.9816	1	0.9899	0.99	1	0.9834
PUM1	1450	ES	07:08:00	4	9	0	0.8464	0.786	0.1846	0.6672	0.8417	1	0.7747	0.8579	0.214	1	0.7516		0.7208	0.44	0.7461	0.7343	0.7352	0.6747	0.8506	0.6761	0.892	0.7934	1	0.8244	1		0.7191	0.278	1	0.4899		0.4471					0.7405	0.7854	1	0.8416	0.9332		0.8093
PUM1	1452	ES	05:06:00	4	7	0	0.9983	0.2338	0.0321	0.9601	0.9434	0.9788	0.9554	0.9523	0.9749	0.9741	0.9432		0.9516	0.952	0.9563	0.9763	0.9509	0.9444	0.9713	0.9529	0.9571	0.9559	0.9597	0.9643	0.7783	1	0.9581	0.9887	0.9696	0.9489	0.9345	0.9735	1	1	1	1	0.9337	0.9417	0.9137	0.9555	0.8889	1	0.9425
PUM1	1453	ES	3	2.2	4	0	0.9442	0.5363	0.0541	0.0143	0	0.0136	0.0103	0.0646	0	0.1583	0.0341		0.015	0.0212	0.0691	0.0341	0.0177	0.0362	0.0299	0.0746	0.0075	0.0309	0.0488	0.0105		0	0	0.0708	0.0468	0.0561	0	0.0362	0				0.0338	0	0.0524	0.0136	0.0268		0.0321
PUM1	1455	AD	2.2	2.1	4	0	0.986	0.2403	0.0161	0.9861	1	1	0.9777	0.9889	1	1	1		1	1	1	0.9852	1	1	0.9819	1	0.9928	0.9916	1	1		0.9109	1	1	1	1	0.9309	1	1			0.7597	0.9959	1	0.9878	1	0.9864	1	1
PUM1	1456	AD	1.2	1.1	2.1	0	0.9738	0.1615	0.0226	0.9613	1	1	0.9702	0.9824	1	1	1		0.9822	1	1	1	0.9603	0.9824	0.9877	1	0.9682	0.9891	0.9699	0.9779		1	0.9592	0.9759	1	1	1	0.9704	1			1	0.9875	0.9216	1	1	0.9782		1
SNRNP40	1457	AP	7.1			0	0.9983	0.9454	0.0931	0.0219	0.0098	0.025	0.053	0.0106	0.1062	0.0206	0.0167	0.0904	0.0424	0.0506	0.0828	0.124	0.0548	0.0345	0.014	0.0258	0.0136	0.0271	0.039	0.1001	0.0587	0.0884	0.0398	0.0341	0.0281	0.027	0.0868	0.0254	0.117	0.021	0.0228	0.0156	0.0009	0.0083	0.0188	0.0073	0.003	0	0.0335
SNRNP40	1458	AP	1			0	0.9983	0.9454	0.0931	0.9781	0.9902	0.975	0.947	0.9894	0.8938	0.9794	0.9833	0.9096	0.9576	0.9494	0.9172	0.876	0.9452	0.9655	0.986	0.9742	0.9864	0.9729	0.961	0.8999	0.9413	0.9116	0.9602	0.9659	0.9719	0.973	0.9132	0.9746	0.883	0.979	0.9772	0.9844	0.9991	0.9917	0.9812	0.9927	0.997	1	0.9665
SNRNP40	1459	ES	10	9	11	0	1	0.716	0.069	0.1902	0.1584	0.162	0.177	0.0546	0.1855	0.2159	0.1554	0.1162	0.1867	0.3066	0.1392	0.1883	0.1536	0.1005	0.1071	0.1944	0.199	0.1254	0.1378	0.0925	0.164	0.1138	0.1713	0.1054	0.1507	0.1273	0.1649	0.169	0.2116	0.0883	0.0976	0.0872	0.0671	0.0691	0.1346	0.082	0.0557	0.0826	0.2311
ZCCHC17	1460	AD	7.2	7.1	8	0	1	0.2685	0.0181	0	0	0.0212	0.0083	0	0.0114	0	0	0	0.0415	0	0.0052	0.0147	0.0068	0.0086	0	0	0	0	0	0	0	0	0.0082	0.0075	0	0.0086	0.0302	0	0	0	0.0139	0	0.0031	0	0	0	0	0	0.0378
ZCCHC17	1461	ES	3	2	4	0	1	0.7959	0.0729	0.2267	0.1222	0.1408	0.1482	0.1059	0.3577	0.2485	0.2126	0.2636	0.0751	0.3064	0.1059	0.2488	0.1696	0.2008	0.0849	0.0789	0.1822	0.1643	0.1044	0.1363	0.134	0.112	0.186	0.1352	0.2063	0.1238	0.2178	0.1611	0.3295	0.0971	0.1011	0.1723	0.0741	0.0508	0.2056	0.1402	0.0227	0.1417	0.092
ZCCHC17	1463	ES	02:03:00	1.1	4	0	0.9389	0.6876	0.1471	1	0.6007	0.8954	1	1	1	0.7414	0.8926	0.6976	0.46	0.9358	0.8289	0.7677	0.8765	0.8418	1		1	0.9003	0.8312	0.8072		0.5686	0.9156	0.8746	0.9535	0.8996	1	1	0.853	0.7657	0.6972	0.885	0.7925	1	0.9107	0.8318		1
ZCCHC17	1464	ES	1.2:2	1.1	4	0	0.801	0.8237	0.2006	1	0.4755			1		0.3122	0.7346		0.7237	0.6916	0.6486	0.3078	0.6091	0.5718	1		1	0.8813	0.8909			0.3259		0.8187	0.8284			1	0.6724		0.4929	0.896	0.8658	1	0.7688	0.8709	1	1	0.8413
ZCCHC17	1465	ES	2	1.1	4	0	1	0.1531	0.0248	1	0.9359	0.982	1	1	1	0.9459	0.9811	0.9183	0.9427	0.9733	0.9846	0.9324	0.9802	0.9673	1	1	1	0.9855	0.9808	0.9739	1	0.9509	0.9836	0.9849	0.9881	0.988	1	1	0.9583	0.9765	0.9437	0.9825	0.9819	1	0.9804	0.9783	1	1	0.9638
ZCCHC17	1466	AD	1.2	1.1	2	0	0.9878	0.3687	0.0477	0.0839	0.0722	0.0263	0.007	0.0906	0.0565	0.0291	0.0552	0	0.1475	0.068	0.0369	0.0375	0.0381	0.0504	0.0527	0.04	0.0704	0.1119	0.159	0.0212	0	0.028	0.0232	0.077	0.0656	0.0156	0.043	0.0824	0.0887	0.0113	0.0617	0.1571	0.1244	0.0515	0.0774	0.1579	0.0451	0.0306	0.1957
FABP3	1467	ES	3	2	4	0	0.9651	0.3984	0.035	0	0.0151	0.0121	0.0505	0	0	0.006	0.0174	0.0095	0.0119	0.0276	0.0529	0.0309	0	0.0176	0.0771	0.0111	0.0174	0.0191	0.0593	0	0.029	0.0045	0.0734	0.0107	0.008	0.0226	0.0525	0.0537	0.0264	0.0518	0	0	0.0119	0.0785	0.0089	0.0418	0.0343	0.0133	0.0452
SERINC2	1468	AP	1			0	0.993	0.4713	0.02	0	0	0	0	0	0	0	0	0	0	0	0	0	0	0	0	0	0	0	0	0	0	0	0	0	0	0	0	0.0027	0	0	0	0	0	0	0	0	0.0232	0	0
SERINC2	1469	AP	3			0	0.993	1	0.098	0.9691	0.9621	0.9429	0.9332	0.928	0.9858	0.9189	0.897	0.9531	0.8394	0.8914	0.9655	0.864	0.9305	0.9402	0.8887	0.9493	0.8925	0.9568	0.9121	0.9258	0.9702	0.88	0.9351	0.911	0.7492	0.8596	0.9824	0.9086	0.9078	0.8005	1	0.7873	0.9068	0.8171	0.9233	0.9464	0.9248	0.861	0.9536
SERINC2	1470	AP	2.1			0	0.993	0.0899	0.0042	0	0	0	0	0	0	0	0	0	0	0.0021	0	0	0.0024	0	0	0	0	0	0	0	0	0.0127	0	0	0.0036	0	0	0	0	0	0	0	0.001	0	0	0	0	0	0
SERINC2	1471	AP	4			0	0.993	1	0.0902	0.0309	0.0379	0.0571	0.0668	0.072	0.0142	0.0811	0.103	0.0469	0.1606	0.1065	0.0345	0.136	0.0671	0.0598	0.1113	0.0507	0.1075	0.0432	0.0879	0.0742	0.0298	0.1073	0.0649	0.089	0.2471	0.1404	0.0176	0.0886	0.0922	0.1995	0	0.2127	0.0922	0.1829	0.0767	0.0536	0.052	0.139	0.0464
TINAGL1	1473	AT	4			0	1	0.5665	0.0439	0.028	0.0121	0.0096	0.037	0.0095	0.0071	0.0063	0.0105	0.0045	0.0138	0.0303	0.0317	0.0707	0.0398	0.0066	0.0192	0.0183	0.0069	0.0095	0.0093	0.052	0.004	0.0335	0.0218	0.0215	0.0293	0.0066	0.0166	0.0179	0.0093	0	0	0.0065	0.0019	0	0.0113	0	0	0	0.0052
TINAGL1	1474	AT	12			0	1	0.5665	0.0439	0.972	0.9879	0.9904	0.963	0.9905	0.9929	0.9937	0.9895	0.9955	0.9862	0.9697	0.9683	0.9293	0.9602	0.9934	0.9808	0.9817	0.9931	0.9905	0.9907	0.948	0.996	0.9665	0.9782	0.9785	0.9707	0.9934	0.9834	0.9821	0.9907	1	1	0.9935	0.9981	1	0.9887	1	1	1	0.9948
TINAGL1	1476	RI	5.2	5.1	5.3	0	0.9948	0.3144	0.0516	0.0516	0.0792	0.0765	0.0699	0	0.1407	0.0961	0.099	0.0542	0.0985	0.1593	0.1573	0.2328	0.0535	0.0612	0.1067	0.0245	0.0639	0.0844	0.1143	0.1177	0.1123	0.0738	0.102	0.0725	0.1348	0.0872	0.1352	0.1337	0.1823	0.0296	0.0804	0.0429	0.0173	0.038	0.0714	0.0872	0	0.0317	0.0514
TINAGL1	1477	AA	5.1:5.2	3	5.3	0	0.7592	0.3774	0.0459	1		1	1			0.9127	1		1	1	0.9497	1	1	1	1		0.9349	1	1	1	1		1	1	0.8817	1	1	1	1				1		1				1
TINAGL1	1478	ES	5.1	3	5.3	0	0.9983	0.0595	0.0042	1	1	1	1	1	1	0.9935	1	1	1	1	0.9924	1	1	1	1	1	0.9967	1	1	1	1	1	1	1	0.9848	1	1	1	1	1	1	1	1	1	1	1	1	1	1
TINAGL1	1479	ES	3	2	5.1	0	0.9983	0.1033	0.0078	0.9957	1	1	1	1	0.8967	1	1	1	0.995	1	0.9932	1	1	0.9973	0.9875	1	0.9966	0.9967	1	1	1	1	1	1	0.9822	0.9874	1	1	1	1	1	1	1	0.9825	0.9729	1	1	1	1
PEF1	1487	AT	3			0	1	0.2398	0.0218	0.0042	0.0046	0.0068	0.0108	0.0061	0.0123	0.0012	0.0032	0.0019	0.0095	0.0295	0.0204	0.0293	0.0225	0.0055	0.0038	0.0065	0.0032	0.0097	0.0083	0.018	0.0072	0.0164	0.0286	0.0179	0.0113	0.015	0.0222	0.0032	0.0103	0.0039	0.0053	0.0064	0.0016	0.0025	0.0062	0.0033	0.0009	0.0054	0.0247
PEF1	1488	AT	6			0	1	0.2398	0.0218	0.9958	0.9954	0.9932	0.9892	0.9939	0.9877	0.9988	0.9968	0.9981	0.9905	0.9705	0.9796	0.9707	0.9775	0.9945	0.9962	0.9935	0.9968	0.9903	0.9917	0.982	0.9928	0.9836	0.9714	0.9821	0.9887	0.985	0.9778	0.9968	0.9897	0.9961	0.9947	0.9936	0.9984	0.9975	0.9938	0.9967	0.9991	0.9946	0.9753
COL16A1	1490	AT	45.2			0	1	0.0612	0.0065	0.0115	0	0	0	0	0	0	0.003	0	0	0.0295	0.0154	0	0	0.0039	0.0025	0	0.0117	0	0	0	0	0	0	0.0035	0	0	0	0	0	0	0	0	0.0035	0	0.0011	0	0	0	0.0022
COL16A1	1491	AT	75			0	1	0.0612	0.0065	0.9885	1	1	1	1	1	1	0.997	1	1	0.9705	0.9846	1	1	0.9961	0.9975	1	0.9883	1	1	1	1	1	1	0.9965	1	1	1	1	1	1	1	1	0.9965	1	0.9989	1	1	1	0.9978
COL16A1	1492	ME	47|48	46	49	0	0.9494	0.085	0.0074	0.9801	1	1	1	1	1	1	1	1	0.9892	1	1	1	1	0.975	1	1	1	1	1	1	1	1	1	1	1	1		1	1				0.9972		1	1	1	1	1
COL16A1	1493	ES	44	43	45.1	0	0.9302	1	0.2144	0.3094	0.5087	0.4472	0.51	0.9724	0.8269	0.8768	0.6372	0.1877	0.817	0.8859	0.6735	0.453	0.4333	0.5994	0.4565	0.4251	0.8255	0.6913	0.8381	0.7639		0.7344	0.5042	0.4632	0.5567	0.66		0.8422	0.6083				0.5614		0.4158	0.8784	0.7806	0.6016	0.7689
PTP4A2	1518	ES	7	6	8	0	1	0.08	0.0076	0.9843	0.9771	0.9831	0.9851	0.9895	0.9857	0.9636	0.9738	0.9894	0.985	0.996	0.9901	0.9969	0.9788	0.9844	0.9755	0.9772	0.9905	0.9849	0.9818	0.9811	0.9958	0.9842	0.9836	0.982	0.9922	0.9917	0.9915	0.9833	0.9908	0.9868	0.9842	0.9733	0.9833	0.9838	0.9879	0.9686	0.985	0.9671	0.9834
PTP4A2	1523	ES	06:07:00	3	8	0	1	0.0221	0.0038	0.9808	0.9863	0.9896	0.986	0.997	1	0.9971	0.9944	0.9905	0.9953	0.9862	0.9942	0.9973	0.9865	0.9963	0.9952	0.9965	0.9978	0.9924	0.9947	0.9965	0.9925	1	0.9938	0.9924	0.9967	0.9954	1	0.9967	0.9886	0.9894	0.9931	0.9857	0.9947	0.9924	0.9936	0.985	0.9904	0.9957	0.9964
PTP4A2	1527	ES	6	3	8	0	0.986	0.7241	0.1191	0.548	0.7385	0.6895	0.6084	0.8827	1	0.9692	0.8766	0.6764	0.8289	0.3151	0.7656		0.7341	0.867	0.8938	0.9112	0.8696	0.76	0.8447	0.9133	0.4883	1	0.8414	0.8227	0.8045	0.7594	1	0.8882	0.6325	0.6804	0.7802	0.741	0.8363	0.787	0.7456	0.7818	0.7414	0.933	0.8818
PTP4A2	1530	ES	6	3	7	0	1	0.028	0.0024	1	1	1	1	1	0.9981	1	1	0.9984	0.998	1	0.9987	1	1	0.9992	0.9983	1	1	1	1	0.999	0.9957	1	1	1	1	0.9966	1	0.9991	1	1	1	1	0.9991	1	0.9983	0.9964	1	1	1
PTP4A2	1531	ES	04:05:00	3	6	0	1	0.0258	0.0022	0	0.0017	0	0.001	0.0006	0	0.003	0	0	0.0006	0.0006	0.0008	0.0033	0	0.0027	0	0	0.0006	0.0007	0	0.0013	0.0019	0.0009	0.0043	0.0003	0	0.0019	0	0.0008	0	0	0	0	0.0003	0	0.0013	0	0.0009	0	0.0011
PTP4A2	1532	ES	5	3	6	0	1	0.0109	0.0019	0	0	0.007	0	0	0	0	0	0	0.0018	0.0008	0.0049	0	0	0	0.0026	0	0.001	0.001	0.0034	0.002	0.0027	0	0.0017	0.0004	0	0	0	0.0028	0.0033	0	0	0.0059	0.0004	0	0.001	0.0028	0	0.0026	0.0015
PTP4A2	1535	ES	03:04:05	2	6	0	0.9895	0.4488	0.0287	0	0.0235	0	0.0192	0.0074	0	0.0326	0	0	0.0058	0.0065	0.0103	0.0304	0	0.0244	0	0	0.0094	0.0061	0	0.009	0.0177	0.0078	0.0533	0.0027	0	0.0162	0	0.0064		0	0	0	0.0032		0.0116	0	0.0058	0	0.0119
PTP4A2	1536	ES	03:05:00	2	6	0	0.9913	0.2897	0.0375	0	0	0.1191	0	0	0	0	0	0	0.0347	0.0081	0.1264	0	0	0	0.05	0	0.0132	0.0076	0.0446	0.0295	0.0222	0	0.0318	0.0034	0	0	0	0.0405	0.1219	0	0	0.0401	0.0096		0.0161	0.0334	0	0.0414	0.0149
PTP4A2	1537	ES	3	2	6	0	1	0.1359	0.0157	0.9409	0.9616	0.949	0.9705	0.9544	0.925	0.9179	0.9578	0.9719	0.9426	0.9528	0.9647	0.9446	0.9548	0.9401	0.9442	0.9242	0.9644	0.9426	0.9477	0.9354	0.9383	0.9417	0.9479	0.9374	0.9415	0.9407	0.9377	0.9422	0.9721	0.9472	0.9549	0.8546	0.9554	0.9893	0.9379	0.9338	0.9121	0.9495	0.9534
KHDRBS1	1542	ES	3	2	4	0	1	0.1027	0.0137	0.9567	0.9726	0.9838	0.9665	0.9793	0.9922	0.9975	0.9702	0.9635	0.98	0.9575	0.9862	0.9874	0.9754	0.974	0.9758	1	0.9784	0.9755	0.9767	0.9741	1	0.9708	0.948	0.989	0.9861	0.9714	0.9803	0.9701	0.969	1	0.9711	0.9846	0.9805	0.9807	0.9705	0.9689	0.9865	0.988	0.9725
TMEM39B	1543	AT	9.2			0	1	0.6797	0.0735	0.1547	0.1749	0.1329	0.1757	0.077	0.1359	0.1473	0.1349	0.0997	0.1655	0.3056	0.1704	0.2439	0.2193	0.1135	0.1581	0.1138	0.1647	0.1627	0.1565	0.1782	0.1182	0.1832	0.1845	0.1717	0.1617	0.1529	0.1512	0.1441	0.1771	0.1082	0.1192	0.1682	0.1287	0.0993	0.1007	0.1454	0.0661	0.0948	0.2297
TMEM39B	1545	AT	10			0	1	0.6797	0.0735	0.8453	0.8251	0.8671	0.8243	0.923	0.8641	0.8527	0.8651	0.9003	0.8345	0.6944	0.8296	0.7561	0.7807	0.8865	0.8419	0.8862	0.8353	0.8373	0.8435	0.8218	0.8818	0.8168	0.8155	0.8283	0.8383	0.8471	0.8488	0.8559	0.8229	0.8918	0.8808	0.8318	0.8713	0.9007	0.8993	0.8546	0.9339	0.9052	0.7703
TMEM39B	1546	ES	6	5	7.2	0	0.9965	0.3411	0.0444	1	1	0.9362	1	1	0.957	0.8554	0.9228	1	0.9082	0.9739	0.9583	0.9678	0.9576	0.9892	0.9206	1	0.967	1	0.9314	1	1	0.9658	0.9467	1	1	0.9546	1	1	0.7018	1	1	0.8899	0.9474	0.9759	0.9725	1	1	1	1
TMEM39B	1549	ES	05:06:00	3	7.2	0	0.9895	0.5059	0.0741	0.9545	0.8284	0.8988	1	0.752	0.9766	0.4941	0.9187	0.883	0.8358	1	1	0.8988	0.9471	0.9517	0.952	1	0.8795	0.899	0.9557	1	1	0.9087	0.8904	0.9224	0.8995	0.8713	0.645	0.8235	0.8697	0.7078	1	0.7848	0.914	0.9723	0.9389	0.8531	0.8046	0.9467	0.875
KPNA6	1553	AP	1			0	0.925	0.5564	0.0394	1	0.968	0.9796	1	1	0.9697	1	1		1	1	0.9054	1	0.9705	1	1	1	1	1	1	1		1	0.8617	1	1	0.9553		0.9614		0.8423		1	0.9739	0.9468	0.9846	1	1		1
KPNA6	1554	AP	2			0	0.925	0.4702	0.0358	0	0.032	0.0204	0	0	0.0303	0	0		0	0	0	0	0.0295	0	0	0	0	0	0	0		0	0.1383	0	0	0.0447		0.0386		0.1577		0	0	0.0532	0.0154	0	0		0
KPNA6	1555	AP	3			0	0.925	0.1036	0.0118	0	0	0	0	0	0	0	0		0	0	0.0946	0	0	0	0	0	0	0	0	0		0	0	0	0	0		0		0		0	0.0261	0	0	0	0		0
KPNA6	1556	AA	9.1	8	9.2	0	0.9546	0.0282	0.0034	1	1	1	1	1	1	1	1		1	1	0.9718	1	1	1	1	1	1	1	1	1		1	1	1	1	1		1	1	1	1	1	1	1	1	1	1	1	1
KPNA6	1557	AD	5.2	5.1	6	0	0.9319	0.256	0.0302	1	1	1	0.9769	1	1		1		1	1	1	1	0.9728	0.9728	0.98	1	1	1	1	0.9614		1	1	0.9373	0.9208	1		1	1	1		1	0.9808	1	1	1	1		1
TXLNA	1558	AP	1			0	0.9878	0.9349	0.1156	0.6415	0.7949	0.7307	0.6402	0.5971	0.5948	0.5601	0.5441		0.6846	0.7053	0.601	0.7444	0.8381	0.7546	0.7254	0.7781	0.6251	0.677	0.5245	0.7362		0.6011	0.6194	0.4931	0.3388	0.5262	0.6846	0.629	0.7031	0		0.6112	0.5609	0.7307	0.6846	0.6846	0.7319	0.4004	0.5456
TXLNA	1559	AP	2.1			0	0.9878	0.9349	0.1156	0.3585	0.2051	0.2693	0.3598	0.4029	0.4052	0.4399	0.4559		0.3154	0.2947	0.399	0.2556	0.1619	0.2454	0.2746	0.2219	0.3749	0.323	0.4755	0.2638		0.3989	0.3805	0.5069	0.6612	0.4738	0.3154	0.371	0.2969	1		0.3888	0.4391	0.2693	0.3154	0.3154	0.2681	0.5996	0.4544
CCDC28B	1560	AT	3			0	1	0.7919	0.1002	0.2012	0.0189	0.1124	0.1127	0.0571	0.1068	0.1562	0.0328	0.0446	0.0969	0.3263	0.1177	0.197	0.1398	0.0495	0.124	0.1623	0.1679	0.055	0.0671	0.4034	0.0849	0.1449	0.1603	0.0651	0.1218	0.1383	0.1949	0.185	0.2956	0.0309	0.0428	0.1219	0.0308	0.0303	0.019	0.0368	0.0179	0.0355	0.133
CCDC28B	1561	AT	6.3			0	1	0.7919	0.1002	0.7988	0.9811	0.8876	0.8873	0.9429	0.8932	0.8438	0.9672	0.9554	0.9031	0.6737	0.8823	0.803	0.8602	0.9505	0.876	0.8377	0.8321	0.945	0.9329	0.5966	0.9151	0.8551	0.8397	0.9349	0.8782	0.8617	0.8051	0.815	0.7044	0.9691	0.9572	0.8781	0.9692	0.9697	0.981	0.9632	0.9821	0.9645	0.867
CCDC28B	1562	RI	6.2	6.1	6.3	0	0.9808	1	0.1736	0.3586	0.0546	0.3418	0.2715	0.1303	0.3964	0.1175	0.049	0.3008	0.2287	0.4227	0.323	0.3259	0.4824	0.1497	0.4044	0.3996	0.3555	0.0667	0.2142	0.6603	0.2265	0.1551	0.2854	0.2606	0.302	0.3411	0.4441	0.5158	0.3681	0.1378	0.1053	0.2479	0.1415	0.1058	0.0434	0.1232	0.2265	0.1801	0.3309
CCDC28B	1563	AA	5.1	4	5.2	0	0.9599	0.1798	0.0149	0.9375	1	1	1	1	1	1	1	1	1	1	0.9786	1	1	1	0.9215	1	1	1	1	1	1	1	1	1	1	1		1	1	1	1	1	1	1	1	1	1	1	1
IQCC	1564	AD	1.2	1.1	2	0	0.7853	0.9835	0.213	0.5328	0.6822	0.4109	0.5629		0.8703	0.1926			0.6525	0.4015	0.3244	0.7234	0.5773	0.2318	0.4882		0.547	0.2793	0.5809	0.547	0.7469	0.4991	0.6443		0.8061	0.477	0.7071	0.4109	1	0.309	0.56		0.429	0.1387	0.3003	0.4459		0.4991	1
TMEM234	1567	AT	5.9			0	1	0.7103	0.1257	0.387	0.3084	0.407	0.405	0.1614	0.1893	0.0583	0.2229	0.1626	0.3016	0.2989	0.2775	0.2253	0.3447	0.21	0.1806	0.1492	0.1747	0.2938	0.1953	0.2755	0.1378	0.3103	0.1702	0.3395	0.2506	0.383	0.264	0.2672	0.2885	0.1784	0.1203	0.2944	0.2229	0.4854	0.5337	0.1332	0.154	0.2407	0.2047
TMEM234	1568	AT	7			0	1	0.7103	0.1257	0.613	0.6916	0.593	0.595	0.8386	0.8107	0.9417	0.7771	0.8374	0.6984	0.7011	0.7225	0.7747	0.6553	0.79	0.8194	0.8508	0.8253	0.7062	0.8047	0.7245	0.8622	0.6897	0.8298	0.6605	0.7494	0.617	0.736	0.7328	0.7115	0.8216	0.8797	0.7056	0.7771	0.5146	0.4663	0.8668	0.846	0.7593	0.7953
TMEM234	1569	RI	6.2	6.1	6.3	0	0.9721	0.8047	0.165	0.7608	0.7512	0.7505	0.7629	1	0.6691		0.8402	0.6454	0.9037	0.7362	0.7726	0.9097	0.7902	1	0.6885	1	0.5928	0.8395	0.7726	0.9329	0.6132	0.9149	0.616	0.8017	0.8223	0.7177	0.9093	0.9006	0.7698	0.8717	1	1	0.6016	0.8955	0.9357	0.8291		0.5426	0.8315
TMEM234	1570	RI	5.7	5.6	5.8	0	0.9983	0.6428	0.1104	0.8384	0.8148	0.7567	0.7439	0.9026	0.8794	1	0.9717	0.7786	0.761	0.7394	0.6535	0.5667	0.7118	0.7788	0.9444	1	0.8317	0.7752	0.9488	0.7138	0.9565	0.4256	0.8464	0.7181	0.7424	0.7689	0.8317	0.8914	0.7118	0.9124	0.9315	0.7726	0.9434	0.6232	0.8527	0.7942	0.9377	0.8345	0.8691
TMEM234	1571	RI	5.5	5.4	5.6	0	1	0.4182	0.0732	0.8463	0.9032	0.8286	0.7806	0.9376	0.9131	1	0.9271	0.6508	0.7818	0.7652	0.8164	0.7969	0.8027	0.7731	0.9431	0.8846	0.8127	0.8176	0.9009	0.8491	0.8972	0.6953	0.79	0.8274	0.9038	0.8621	0.8677	0.9517	0.6604	0.9802	0.8913	0.793	0.8961	0.8579	0.887	0.8295	0.9503	0.8345	0.9452
TMEM234	1573	RI	5.2:5.3	5.1	5.4	0	0.9948	1	0.1162	0.0831	0.1106	0.2652	0.2644	0.0662	0.3942	0.0764	0.1362	0.026	0.3228	0.4471	0.2757	0.3692	0.2246	0.1977	0.0763	0.1807	0.1959	0.1718	0.1909	0.2517	0.2664	0.4619	0.175	0.3368	0.4483	0.2186	0.1769	0.3564	0.2756	0.2084	0.1507	0.2303	0.1745	0.1032	0.1986	0.4237	0.2733	0.1952	0.4982
TMEM234	1574	AA	5.3	5.1	5.4	0	0.9756	0.4531	0.0514	0	0.0192	0	0.0392	0	0	0	0.1301	0.0101	0	0	0	0	0	0	0.027	0	0	0.0535	0.0317	0.0836	0	0.2734	0	0	0.2479	0	0.1065	0	0	0.0797	0.2218	0	0	0	0.0471	0	0.0576	0	0.0762
TMEM234	1575	ES	4	3	5.1	0	0.9965	0.9608	0.1323	0.2597	0.221	0.3693	0.4385	0.383	0.3211	0.1414	0.1024	0.0421	0.4703	0.5233	0.3631	0.3321	0.4629	0.2776	0.1766	0.2516	0.2195	0.2522	0.2131	0.2164	0.1348	0.5224	0.2017	0.3544	0.2776	0.282	0.4213	0.2227	0.547	0.1759	0.3186	0.3488	0.1404	0.383	0.1103	0.3578	0.1612	0.2106	0.4346
TMEM234	1576	ES	02:03:04	1	5.1	0	0.9546	0.4515	0.0631	1	0.7781	1	1	1	1		1	1	1	1	1	1	1	1	1	1	0.9129	1	1	1	1	1	1	1	1	0.9347	1	1	1	0.6885	1	1	1	1	0.8725	1	1	0.849	1
TMEM234	1577	ES	02:03:00	1	5.1	0	0.9965	0.1449	0.0148	1	0.9388	1	1	1	1	1	1	1	1	1	1	1	1	1	1	1	0.9787	1	1	1	1	1	1	1	1	0.9809	1	1	1	0.9312	1	1	1	1	0.986	1	1	0.9795	1
LCK	1579	AP	2			0	0.8761	0.9535	0.1605	0.0661	0.113	0	0.105		0		0	0.1539	0.2127		0.1712	0	0	0.1674	0		0.1674	0	0.2206			0	0	0		0		0		0			0	0.1239	0	0.0661		0	0
LCK	1581	AP	1			0	0.8761	0.9535	0.1605	0.9339	0.887	1	0.895		1		1	0.8461	0.7873		0.8288	1	1	0.8326	1		0.8326	1	0.7794			1	1	1		1		1		1			1	0.876	1	0.9339		1	1
LCK	1582	AA	10.1	9	10.2	0	0.8115	0.5973	0.0704	0.0645	0.0958	0.2834	0.1927	0	0.1415	0.2834	0.1216		0.09		0.1982	0.2102	0.1982	0.0632	0.03		0.0471	0.11	0.0813			0	0.2949	0.2011		0.1897		0.261	0.2203						0.099	0		0.053	0.0861
LCK	1583	ES	8	7	9	0	0.9791	0.4064	0.0467	0.9864	1	0.9817	0.9627	0.8963	1	0.5936	0.8695	1	0.9559	1	0.8912	1	0.9771	0.9549	1	1	0.9843	1	0.9436			1	1	0.9825	1	1		1	0.9234	1	0.9478	1	0.9212	0.9234	1	0.8564	1	1	0.9265
LCK	1584	RI	4.2	4.1	4.3	0	0.8185	0.7514	0.114	0.0812	0.2167	0.3149	0.1634	0.1735	0.2044		0.3093		0.1465		0.2599	0.1976	0.2873	0.053	0.1438		0.1097	0.3531	0.1638			0.2682	0.2668	0.2022		0.3039		0.2514	0.2873	0.1573			0.3093		0	0.1735		0.1761	0.1519
HDAC1	1585	AP	1			0	1	0.101	0.0054	1	1	1	0.9894	1	1	1	0.9944	1	1	1	1	1	0.995	1	1	1	1	1	1	1	1	1	1	1	1	1	1	1	1	0.9721	1	1	1	1	1	0.9872	1	1	0.9922
HDAC1	1586	AP	2			0	1	0.101	0.0054	0	0	0	0.0106	0	0	0	0.0056	0	0	0	0	0	0.005	0	0	0	0	0	0	0	0	0	0	0	0	0	0	0	0	0.0279	0	0	0	0	0	0.0128	0	0	0.0078
BSDC1	1589	AT	10.2			0	1	0.0103	0.0012	0	0	0	0	0	0	0	0	0	0	0	0	0	0.004	0	0	0	0	0	0	0	0	0	0	0	0	0	0	0	0	0	0	0	0	0	0.0078	0	0	0	0
BSDC1	1590	AT	11.3			0	1	0.0103	0.0012	1	1	1	1	1	1	1	1	1	1	1	1	1	0.996	1	1	1	1	1	1	1	1	1	1	1	1	1	1	1	1	1	1	1	1	1	0.9922	1	1	1	1
BSDC1	1591	RI	11.2	11.1	11.3	0	1	0.9543	0.1097	0.195	0.1086	0.1331	0.1888	0.1017	0.1923	0.0603	0.1645	0.1328	0.1444	0.1675	0.2651	0.4541	0.2917	0.0502	0.0808	0.0848	0.0929	0.1119	0.1183	0.2401	0.2039	0.1603	0.2841	0.1747	0.2869	0.195	0.2184	0.1541	0.3449	0.152	0.1851	0.2047	0.0381	0.0522	0.0704	0.1158	0.019	0.0974	0.2375
BSDC1	1592	ES	10.1	9	11.1	0	1	0.3455	0.0261	0.0065	0.0299	0.0524	0.0212	0.0072	0.0365	0.003	0.0355	0	0.02	0.0735	0.0337	0.0686	0.0554	0.0278	0.0052	0.0277	0.0237	0.0402	0.0408	0.0693	0.0176	0.0419	0.0116	0.0133	0.0536	0.0579	0.1005	0.0345	0.0693	0.0299	0.0201	0.0328	0.0029	0.0088	0	0.0069	0.0112	0.0036	0.0396
BSDC1	1593	ES	6.2:7:8.1	6.1	8.2	0	1	0.0319	0.0043	0.9939	1	1	1	1	0.9901	1	0.9932	1	0.9956	0.9903	1	1	0.9972	0.9972	1	1	1	1	1	1	1	1	1	1	1	0.9931	1	0.9934	1	0.9681	1	1	1	1	0.9899	1	1	0.99	1
BSDC1	1594	ES	4.1:4.2:4.3:5	3	6.1	0	0.9948	0.0652	0.0046	1	1	1	1	1	1	1	1	1	1	1	1	1	1	1	1	1	1	1	1	1	1	1	1	1	1	1		1	1	1	1	1	1	1	1	1	1	1	1
BSDC1	1595	ES	4.2:4.3:5	3	6.1	0	1	0.0128	0.0009	1	1	1	1	1	1	1	1	1	1	1	1	1	1	1	1	1	1	1	1	1	1	1	1	1	1	1	1	1	1	1	1	1	1	1	1	1	1	1	1
BSDC1	1598	AA	4.1:4.2	3	4.3	0	0.9529	0.4105	0.0804	0.9475	0.9136	0.9447	0.8538	0.9372	0.8534	0.9785	1		0.878	1	0.9748	0.9258	0.8759	0.961	0.9181	1	1	0.8975	0.8362	1		0.9033	0.9185	0.9095	0.8904	0.7318		0.9366		1	1		0.9565	0.908	0.9511	0.8988	0.9239	0.8765	0.9322
BSDC1	1599	AA	4.2	3	4.3	0	1	0.183	0.0188	0.9902	0.9666	0.9901	0.9595	0.99	0.9611	0.9768	1	1	0.9651	1	0.9911	0.9779	0.9795	0.9842	0.9842	1	1	0.9845	0.9721	1	1	0.97	0.9923	0.9786	0.9704	0.9446	1	0.9854	1	1	1	1	0.995	0.988	0.9866	0.9873	0.9869	0.98	0.9848
BSDC1	1600	ES	4.1:4.2:4.3	3	5	0	0.993	0.3457	0.0432	1	1	1	1	1	1	0.9608	0.8928	1	0.9736	1	1	0.9666	0.9571	1	0.9638	1	1	0.9554	1	1	1	1	0.8201	1	1	1		0.905	1	1	1	0.8172	0.8657	0.8573	1	1	1	1	1
BSDC1	1601	ES	4.2:4.3	3	5	0	1	0.0577	0.0077	1	1	1	1	1	1	0.9623	0.974	1	0.9933	1	1	0.9906	0.9937	1	0.9935	1	1	0.9938	1	1	1	1	0.9819	1	1	1	1	0.9785	1	1	1	0.9754	0.9835	0.9812	1	1	1	1	1
BSDC1	1603	AA	4.1	3	4.2	0	0.9983	0.5229	0.0623	0.1584	0.2796	0.1551	0.2057	0.1421	0.2021	0.5381	0.1979	0.1743	0.2214	0.1726	0.268	0.231	0.1329	0.2984	0.1599	0.0954	0.2155	0.1275	0.1385	0.1818		0.2328	0.0864	0.1936	0.2109	0.1496	0.0595	0.1887	0.0795	0.2307	0.3065	0.1132	0.1052	0.1124	0.2173	0.1104	0.1481	0.1334	0.1933
BSDC1	1605	ES	3:4.1:4.2:4.3	2	5	0	0.986	0.1389	0.0115	1	1	1	1	1	1	1	1	1	1	1	1	1	1	1	1	1	1	1	1	1	1	1	1	1	1	1	1	1	1	1	1	1	1	1	1	1	1	1	1
BSDC1	1606	ES	3:4.2:4.3	2	5	0	1	0.0145	0.0015	1	1	1	1	1	1	1	1	1	1	1	1	1	1	1	1	1	1	1	1	1	1	1	1	1	1	1	1	1	1	1	1	1	1	1	1	1	1	1	1
ZBTB8A	1609	AA	5.1	4	5.2	0	0.9913	0.7295	0.1233	1	0.8208	0.7659	0.8259	0.7598	0.7465	1	1	0.8307	0.7235	0.7633	0.7533	0.7316	0.9598	0.6625	0.6428	0.797	0.8804	0.6849	0.7465	0.6264	0.6716	0.7355	0.8827	0.8983	0.759	0.5668		1	1	0.878	0.744	0.6241	0.6716	0.7825	0.7411	0.9046	0.8367	0.893	0.8154
ZBTB8OS	1610	AT	8			0	1	0.3914	0.0643	0.1024	0.1622	0.1674	0.1598	0.1644	0.0998	0.0239	0.0494	0.0381	0.1353	0.2205	0.2232	0.1194	0.2184	0.2145	0.2305	0.1159	0.3122	0.2897	0.2053	0.1362	0.0667	0.1004	0.0961	0.2082	0.1647	0.0994	0.0522	0.0629	0.1564	0.1654	0.1538	0.1412	0.2451	0.1829	0.0967	0.2718	0.3933	0.1209	0.1669
ZBTB8OS	1611	AT	7			0	1	0.3914	0.0643	0.8976	0.8378	0.8326	0.8402	0.8356	0.9002	0.9761	0.9506	0.9619	0.8647	0.7795	0.7768	0.8806	0.7816	0.7855	0.7695	0.8841	0.6878	0.7103	0.7947	0.8638	0.9333	0.8996	0.9039	0.7918	0.8353	0.9006	0.9478	0.9371	0.8436	0.8346	0.8462	0.8588	0.7549	0.8171	0.9033	0.7282	0.6067	0.8791	0.8331
ZBTB8OS	1612	ES	5	4	6	0	1	0.3575	0.0581	0.8073	0.7014	0.8101	0.8598	0.8002	0.9005	0.6519	0.8504	0.9045	0.825	0.9341	0.8569	0.9061	0.7735	0.8529	0.886	0.8884	0.9019	0.8378	0.7258	0.7718	0.9258	0.8497	0.7997	0.7284	0.8773	0.8804	0.8476	0.805	0.7985	0.7931	0.7994	0.6602	0.7753	0.7721	0.905	0.8447	0.7606	0.7832	0.714
RBBP4	1615	AP	1			0	0.9983	0.0487	0.0028	1	1	1	1	1	1	1	1	1	1	1	1	1	1	1	0.9969	1	1	1	1	1	1	1	1	1	0.9948	1	1	1	1	1	1	1	1	1	1	1	1	1	1
RBBP4	1616	AP	2			0	0.9983	0.0487	0.0028	0	0	0	0	0	0	0	0	0	0	0	0	0	0	0	0.0031	0	0	0	0	0	0	0	0	0	0.0052	0	0	0	0	0	0	0	0	0	0	0	0	0	0
RBBP4	1622	AA	14.1	13	14.2	0	1	0.0162	0.0019	1	0.9982	1	1	1	0.9985	1	1	0.9838	0.9973	1	0.9994	1	0.9984	0.9988	1	1	0.9982	0.9992	0.9988	0.9989	1	1	1	0.9987	0.9974	1	0.9973	0.9972	1	0.9959	0.9945	0.9964	0.998	1	0.9994	1	0.9967	1	1
RBBP4	1623	ES	5	4	6	0	1	0.545	0.075	0.066	0.0759	0.1438	0.0572	0.0295	0.1701	0	0.0492	0	0.0712	0	0.0496	0.1192	0.0415	0.0485	0.0668	0.1022	0.0746	0	0.1613	0.0888	0	0.1788	0	0.0657	0.068	0.0496	0.1193	0.0613	0.0609	0.1472	0.0953	0.0698	0.0361	0.0879	0.0782	0	0.0151	0.0886	0
RBBP4	1625	ES	4	3.2	6	0	1	0.0121	0.0007	1	1	1	1	1	1	1	1	1	1	0.9975	1	1	1	1	1	1	1	1	0.9979	0.9976	1	1	1	1	1	1	1	1	1	1	1	0.9974	1	1	1	1	1	1	1
RBBP4	1626	ES	04:05:06	3.2	7	0	0.7539	1	0.2321	1	0.6299	0.8336	0.6495	0.3253	0.8567	0	0.6048		0.7278	0	0.6334	0.7796	0.5995	0.6583	0.836	0.7972	0.6604	0	0.809	0.7493		0.7905		0.5995	0.6673	0.884	1	0.8834	0.5288	0.89	0.853	0.4748	0.6273	0.5927	0.5907	0	0.5852	0.9145
RBBP4	1627	ES	04:06:00	3.2	7	0	1	0.0472	0.0069	1	0.985	0.9907	0.9881	0.9775	0.9893	0.9528	0.9876	1	0.9901	0.9804	0.9891	0.9864	0.9901	0.9913	0.9955	0.992	0.9881	0.9876	0.9869	0.9875	0.9769	0.9829	0.994	0.9852	0.9881	0.9977	1	0.9971	0.9746	0.9929	0.9932	0.9769	0.9929	0.9801	0.9812	0.985	0.9959	0.9968	0.9837
RBBP4	1629	AA	3.1	1	3.2	0	0.9983	0.1124	0.015	1	1	0.9447	0.9754	0.9937	0.9867	0.9858	0.9909	1	0.9895	0.9756	0.9785	0.9793	0.9654	0.9711	0.9413	1	0.9858	0.9752	0.9708	0.9498	0.9484	0.9854	0.9793	0.9813	0.9845	0.9901	1	0.9817	1	1	0.9141	0.9866	0.9746	0.9828	0.9538	0.9753	1	1	0.9745
KIAA1522	1631	AP	2			0	0.9843	0.9007	0.1504	0.4673	0.1831	0.461	0.6495	0	0.6778	0.6311	0.5328	0.6311	0.5837	0.302	0.5229	0.5482	0.6369	0.5009	0.6283	0.4897	0.3518	0.6328	0.7507	0.2954	0.4489	0.6165	0.2945	0.2625	0.5837	0.5802	0.4252	0.2311	0.305	0.3632	0.4225	0.5495	0.7449	0.637	0.4893	0.3754	0.5972	0.7403	0.3632
KIAA1522	1632	AP	1			0	0.9843	0.9007	0.1463	0.5327	0.7883	0.539	0.3471	1	0.3108	0.3689	0.4672	0.3689	0.4033	0.6566	0.4702	0.4389	0.3564	0.4991	0.3501	0.5103	0.6482	0.3633	0.2493	0.6609	0.5511	0.3327	0.6523	0.7142	0.4163	0.3981	0.5748	0.7579	0.6775	0.6368	0.5775	0.4505	0.2551	0.363	0.4929	0.6246	0.4028	0.2597	0.6368
KIAA1522	1633	AP	3			0	0.9843	0.4578	0.04	0	0.0285	0	0.0034	0	0.0114	0	0	0	0.013	0.0414	0.0069	0.0129	0.0067	0	0.0215	0	0	0.0039	0	0.0437	0	0.0508	0.0531	0.0233	0	0.0216	0	0.011	0.0174	0	0	0	0	0	0.0178	0	0	0	0
KIAA1522	1634	ES	07:08:00	6	9	0	1	0.0634	0.0052	1	0.9935	1	1	1	1	1	1	1	0.9961	1	0.9955	1	1	1	0.9955	1	1	1	1	0.996	1	1	1	1	1	1	1	0.9963	1	1	1	0.9519	0.9885	1	1	0.9816	1	1	1
S100PBP	1635	AT	9			0	1	0.5251	0.0794	0.4833	0.4375	0.5669	0.4468	0.6454	0.5358	0.4897	0.4501	0.5945	0.3927	0.3292	0.5107	0.5103	0.5246	0.6481	0.5197	0.4793	0.4388	0.5259	0.4903	0.6148	0.594	0.6149	0.5362	0.5336	0.6636	0.6237	0.59	0.3947	0.5794	0.5156	0.4457	0.6193	0.6466	0.5928	0.5234	0.5179	0.6702	0.5883	0.4404
S100PBP	1636	AT	7			0	1	0.5251	0.0794	0.5167	0.5625	0.4331	0.5532	0.3546	0.4642	0.5103	0.5499	0.4055	0.6073	0.6708	0.4893	0.4897	0.4754	0.3519	0.4803	0.5207	0.5612	0.4741	0.5097	0.3852	0.406	0.3851	0.4638	0.4664	0.3364	0.3763	0.41	0.6053	0.4206	0.4844	0.5543	0.3807	0.3534	0.4072	0.4766	0.4821	0.3298	0.4117	0.5596
S100PBP	1637	AA	4.1	3	4.2	0	0.9791	0.7661	0.1143	0.557	0.7364	0.7838	0.7074	0.6007	0.6592	0.6171	0.78		0.5417	0.6592	0.6118	0.5401	0.5494	0.7042	0.7074	0.6286	0.4293	0.684	0.6898	0.4916	0.5919	0.6691	0.5828	0.5919	0.7206	0.757	0.4362	0.6592	0.7154	0.6528	0.4918	0.4267	0.5531	0.6462	0.6537	0.5752	0.6535	0.6049	0.4916
S100PBP	1638	AD	1.2	1.1	2	0	0.8115	0.7082	0.0856		1	0.9038	1	0.8504	1	1	1		1	1	1	1	0.9703	0.9405	0.9468		1	0.9626	1	0.8318			1	0.9326	1	1		1		1		1	0.8558	0.8447	0.9326	1	0.9422		1
FNDC5	1641	AT	6.2			0	1	0.7622	0.1314	0.0709	0.3768	0.1072	0.2464	0	0.0954	0	0.1942	0.3408	0.2288	0.206	0.1571	0.0942	0.31	0.0557	0.1722	0.0456	0	0.1199	0.2905	0	0	0.2288	0.1335	0.3964	0.0671	0.1036	0	0	0.1787	0.0623	0	0.2959	0.0858	0.1953	0.0503	0	0	0	0.182
FNDC5	1642	AT	7			0	1	0.7622	0.1314	0.9291	0.6232	0.8928	0.7536	1	0.9046	1	0.8058	0.6593	0.7712	0.794	0.8429	0.9058	0.69	0.9443	0.8278	0.9544	1	0.8801	0.7095	1	1	0.7712	0.8665	0.6036	0.9329	0.8964	1	1	0.8213	0.9377	1	0.7041	0.9142	0.8047	0.9497	1	1	1	0.818
TMEM54	1644	ES	00:03:04.100000	2	4.2	0	1	0.036	0.0031	1	0.9952	1	1	0.9968	0.9956	1	0.9988	0.9956	0.9958	0.9991	1	1	0.999	0.9985	0.9917	1	0.9977	0.9948	0.9956	1	1	1	0.9978	1	0.9988	0.9982	1	0.9964	1	0.9988	1	0.9898	0.9991	0.9977	0.9991	1	1	0.9977	1
RNF19B	1646	AA	9.1	8	9.2	0	1	0.4089	0.0599	0.2355	0.3894	0.3391	0.2203	0.3257	0.1662	0.3513	0.3014	0.3542	0.3734	0.3581	0.1944	0.2341	0.342	0.2676	0.2634	0.2127	0.2916	0.2369	0.3051	0.3108	0.295	0.306	0.2983	0.2581	0.2976	0.2454	0.2926	0.3112	0.3223	0.2653	0.2784	0.2718	0.2527	0.2392	0.3775	0.1435	0.3045	0.2862	0.3618
RNF19B	1647	AA	3.1	2	3.2	0	1	0.392	0.0519	0.1325	0.2391	0.2153	0.1717	0.2486	0.1495	0.2115	0.2184	0.2321	0.2438	0.272	0.1796	0.2462	0.197	0.2044	0.2231	0.293	0.2582	0.2098	0.1899	0.1464	0.0746	0.3185	0.2214	0.2152	0.2158	0.0902	0.392	0.2321	0.1103	0.1751	0.1693	0.2039	0.2992	0.2286	0.1799	0.2157	0.2075	0.1787	0.3453
AK2	1649	AT	6			0	1	0.2579	0.0232	0.0045	0.01	0.0166	0.0161	0.0078	0.0011	0.0334	0.0115	0.0029	0.0195	0.0492	0.0405	0.0028	0.0086	0.0072	0.0203	0.0111	0.0232	0.0278	0.0521	0.0127	0.0038	0.0041	0.0107	0.0257	0.0754	0.0042	0.017	0.017	0.0318	0.0084	0.0374	0.0168	0.0095	0.001	0.0131	0.0699	0.0017	0.0025	0.072
AK2	1650	AT	8.2			0	1	0.6258	0.1051	0.4204	0.708	0.5398	0.5209	0.5868	0.5499	0.4224	0.6165	0.8075	0.7296	0.7143	0.5265	0.4825	0.65	0.739	0.5262	0.5342	0.6703	0.6078	0.5722	0.5789	0.6322	0.3713	0.506	0.4767	0.4779	0.5556	0.5545	0.6598	0.5572	0.714	0.6446	0.6803	0.5537	0.5185	0.6442	0.7636	0.4105	0.6734	0.4926
AK2	1651	AT	10			0	1	0.5702	0.104	0.5751	0.282	0.4436	0.463	0.4054	0.4489	0.5441	0.372	0.1897	0.2509	0.2364	0.433	0.5147	0.3414	0.2539	0.4536	0.4548	0.3065	0.3644	0.3757	0.4084	0.3639	0.6246	0.4833	0.4976	0.4467	0.4402	0.4285	0.3232	0.4109	0.2776	0.318	0.3029	0.4369	0.4804	0.3427	0.1664	0.5878	0.3242	0.4354
AK2	1652	ES	9	8.1	10	0	1	0.4468	0.0573	0.0611	0.0894	0.0743	0.1183	0.1362	0.0889	0.4539	0.0439	0.0203	0.1782	0.142	0.1143	0.2081	0.1356	0.0983	0.0555	0.0354	0.0759	0.0976	0.0831	0.1412	0.1164	0.0462	0.1568	0.0823	0.1153	0.0911	0.2362	0.1199	0.1435	0.0146	0.0518	0.0297	0.2254	0.0938	0.1373	0.084	0.0207	0.0327	0.0825
AK2	1653	ES	5	4	7	0	1	0.094	0.0155	0.9884	0.9902	0.973	0.9785	0.9604	0.9888	1	0.9428	0.9931	0.967	0.9907	0.986	0.9911	0.9909	0.9746	0.9847	0.9849	0.9639	0.9534	0.9768	0.9398	0.9667	0.9922	0.9366	0.9877	0.9955	0.9483	0.963	0.906	0.9975	0.9612	0.9763	0.9668	0.9788	0.9885	0.9629	0.9628	0.977	0.9839	0.9906
AK2	1654	ES	02:03:00	1	4	0	1	0.8686	0.0665	0.9392	0.8475	0.9177	0.9385	0.948	0.9044	0.9911	0.9136	1	0.9266	0.896	0.9653	1	0.9248	0.9501	0.9751	1	1	0.9364	0.9061	0.9013	1	0.9411	0.9529	0.9797	0.9895	0.9618	1	0.9443	1	0.9523	0.9053	0.9588	1	0.9363	0.9719	0.9285	0.8583	0.8835	0.9525
AK2	1655	ES	3	1	4	0	0.9983	0.2999	0.0133	0.9962	0.9872	0.9907	0.9945	0.9953	0.9939	0.9981	0.9951	1	0.9943	0.9931	0.9961	1	0.9927	0.9962	0.9983	1	1	0.9948	0.9951	0.9943	1	0.9946	0.9967	0.9981	0.999	0.9979	1	0.9976	1	0.9965	0.9899	0.996	1	0.9949	0.9964	0.9952	0.9935	0.9927	0.9951
AK2	1656	ES	2	1	3	0	1	0.831	0.0583	0.0661	0.0794	0.1172	0.096	0.1045	0.0675	0.2236	0.061	0.0909	0.083	0.0677	0.1258	0.1424	0.0982	0.0835	0.0772	0.0864	0.0717	0.0852	0.0561	0.0636	0.0665	0.1023	0.0811	0.1079	0.1038	0.0646	0.1105	0.0479	0.0988	0.077	0.1058	0.1038	0.1606	0.0877	0.1347	0.0721	0.0453	0.0643	0.1105
ADC	1659	AT	13			0	0.9983	0.9806	0.1056	0.951	0.7254	0.9206	0.8037	0.8473	0.8901	0.7624	0.8927	0.9075	0.7951	0.619	0.8339	0.877	0.8803	0.7761	0.7871	0.7935	1	0.5431	0.7985	0.7279	0.86	0.855	0.8277	0.8259	0.8325	0.8775	0.6855	0.9557	0.7135	0.942	0.8548	0.9673	0.9183	0.9498	0.8999	0.9809	0.9463	0.904	0.8525
ADC	1660	AT	11			0	0.9983	0.9806	0.1056	0.049	0.2746	0.0794	0.1963	0.1527	0.1099	0.2376	0.1073	0.0925	0.2049	0.381	0.1661	0.123	0.1197	0.2239	0.2129	0.2065	0	0.4569	0.2015	0.2721	0.14	0.145	0.1723	0.1741	0.1675	0.1225	0.3145	0.0443	0.2865	0.058	0.1452	0.0327	0.0817	0.0502	0.1001	0.0191	0.0537	0.096	0.1475
ADC	1662	ES	06:07:08	5	9	0	1	0.0785	0.0076	1	1	1	1	1	1	1	1	1	1	1	1	1	1	1	1	1	1	1	1	1	1	1	1	1	1	1	1	1	1	1	1	1	1	1	0.9528	1	1	1	1
TRIM62	1665	AP	1			0	0.9634	0.9408	0.0893	1	1	0.912	0.9488	1	1	1	1	1	1	0.9341	1	1	0.8735	0.8942	1	1	1	1	1	1		1	1	1	1	1	1	1	1				1	1	1	1	1	1	1
TRIM62	1666	AP	2			0	0.9634	0.9408	0.0893	0	0	0.088	0.0512	0	0	0	0	0	0	0.0659	0	0	0.1265	0.1058	0	0	0	0	0	0		0	0	0	0	0	0	0	0				0	0	0	0	0	0	0
PHC2	1670	AP	10			0	0.9878	0.6646	0.0891	0.9066	0.9771	0.907	0.9156	1	0.918	0.9542	0.8356	0.8878	0.6645	0.8543	0.9017	0.5899	0.8485	0.9458	0.9344	0.9043	0.9134	0.9565	0.9034	1	0.9694	0.7793	0.9866	0.9579	0.9062	0.7228	0.935	0.9672	0.974	0.8119	0.7752	1	0.9628	0.9643	0.9182	0.9223	0.6445	1	0.982
PHC2	1671	AP	1			0	0.9878	0.6646	0.0891	0.0934	0.0229	0.093	0.0844	0	0.082	0.0458	0.1644	0.1122	0.3355	0.1457	0.0983	0.4101	0.1515	0.0542	0.0656	0.0957	0.0866	0.0435	0.0966	0	0.0306	0.2207	0.0134	0.0421	0.0938	0.2772	0.065	0.0328	0.026	0.1881	0.2248	0	0.0372	0.0357	0.0818	0.0777	0.3555	0	0.018
PHC2	1674	AT	16			0	1	0.3151	0.024	0.0098	0.0123	0.0058	0.0167	0.0102	0.0133	0.0161	0.0169	0.0049	0.0296	0.0324	0.0703	0.0757	0.0236	0.0103	0.0101	0.0153	0.0097	0.0227	0.0088	0.0338	0.0052	0.0452	0.0274	0.0153	0.0207	0.0226	0.0728	0.0098	0.0344	0.0127	0.0125	0.0075	0.0068	0.0019	0.0134	0.0027	0.007	0.0059	0.0269
PHC2	1675	AT	17			0	1	0.3151	0.024	0.9902	0.9877	0.9942	0.9833	0.9898	0.9867	0.9839	0.9831	0.9951	0.9704	0.9676	0.9297	0.9243	0.9764	0.9897	0.9899	0.9847	0.9903	0.9773	0.9912	0.9662	0.9948	0.9548	0.9726	0.9847	0.9793	0.9774	0.9272	0.9902	0.9656	0.9873	0.9875	0.9925	0.9932	0.9981	0.9866	0.9973	0.993	0.9941	0.9731
ZSCAN20	1678	AT	6.2			0	1	0.6527	0.1169	0.5173	0.3405	0.3648	0.4547	0.1927	0.408	0.1678	0.4973	0.5458	0.4334	0.5134	0.4038	0.4802	0.449	0.3615	0.4466	0.4679	0.4729	0.554	0.3537	0.4653	0.39	0.4893	0.4348	0.406	0.292	0.3212	0.3401	0.3709	0.3689	0.4207	0.5255	0.5211	0.2412	0.2123	0.4477	0.2349	0.1765	0.5147	0.5763
ZSCAN20	1679	AT	8			0	1	0.6527	0.1169	0.4827	0.6595	0.6352	0.5453	0.8073	0.592	0.8322	0.5027	0.4542	0.5666	0.4866	0.5962	0.5198	0.551	0.6385	0.5534	0.5321	0.5271	0.446	0.6464	0.5347	0.61	0.5107	0.5652	0.594	0.708	0.6788	0.6599	0.6291	0.6311	0.5793	0.4745	0.4789	0.7588	0.7877	0.5523	0.7651	0.8235	0.4853	0.4237
CSMD2	1687	AT	50			0	1	0.8237	0.1802	0.6872	0.7959	0.6126	0.7659	0.3248	0.3359	0.4291	0.7383	0.784	0.5162	0.7659	0.4798	0.8696	0.6869	0.7874	0.4756	0.7655	0.7205	0.617	0.846	0.9778	0.3516	0.6777	0.7713	0.2717	0.2819	0.4985	0.8604	0.8026	0.6565	0.3532	0.7041	0.6773	0.404	0.6889	0.8468	0.5258	0.2553	0.9463	0.6058
CSMD2	1688	AT	51			0	1	0.3348	0.0678	0	0	0.1095	0.0547	0.1189	0.204	0.0571	0.0184	0.0615	0.0986	0.0242	0.0494	0	0.0325	0	0.0207	0	0.0182	0.0622	0.0477	0	0.1044	0.058	0.0584	0.2337	0.0529	0	0	0	0	0.2586	0.0909	0.0762	0.1007	0	0.0404	0.0563	0.3348	0	0.0729
CSMD2	1689	AT	78			0	1	0.6718	0.1218	0.2655	0.075	0.1877	0.1794	0.5349	0.3851	0.3904	0.1902	0.1544	0.3851	0.1925	0.3997	0.1304	0.2806	0.1785	0.176	0.2345	0.1827	0.2671	0.1063	0.0222	0.2737	0.2643	0.0652	0.3865	0.4477	0.5015	0.1396	0.1428	0.2137	0.2164	0.1396	0.1916	0.4202	0.3111	0.1128	0.3773	0.2972	0.0537	0.295
CSMD2	1690	AT	17.2			0	1	0.4167	0.075	0.0472	0.1291	0.0901	0	0.0214	0.075	0.1234	0.0531	0	0	0.0174	0.0711	0	0	0.0341	0.3276	0	0.0786	0.0537	0	0	0.2704	0	0.1051	0.1081	0.2175	0	0	0.0546	0.1298	0.1718	0.0654	0.0548	0.0751	0	0	0.0406	0.1127	0	0.0262
SMIM12	1697	AP	1.1			0	0.9983	1	0.0682	0.9551	0.9287	0.9659	0.9733	0.9923	0.9071	0.9788	0.9939	1	0.9371	0.885	0.926	0.9774	0.9845	0.9719	0.9783	0.9817	0.9273	0.9411	0.9701	0.9597	0.8076	0.969	0.9203	0.9655	0.9645	0.9754	0.9757	0.9766	1	0.9911	0.9819	0.9771	0.9686	0.9735	0.9747	0.9357	0.9724	0.9776	0.9809
SMIM12	1698	AP	2.1			0	0.9983	1	0.0682	0.0449	0.0713	0.0341	0.0267	0.0077	0.0929	0.0212	0.0061	0	0.0629	0.115	0.074	0.0226	0.0155	0.0281	0.0217	0.0183	0.0727	0.0589	0.0299	0.0403	0.1924	0.031	0.0797	0.0345	0.0355	0.0246	0.0243	0.0234	0	0.0089	0.0181	0.0229	0.0314	0.0265	0.0253	0.0643	0.0276	0.0224	0.0191
SMIM12	1699	AT	7			0	1	0.1898	0.0232	0.0443	0.0341	0.044	0.0533	0.0219	0.056	0.0273	0.0454	0.0539	0.067	0.1163	0.0729	0.0945	0.0567	0.0327	0.0401	0.0491	0.042	0.0448	0.0418	0.0685	0.0505	0.0596	0.0648	0.0466	0.0648	0.0507	0.0728	0.0401	0.0867	0.0128	0.0331	0.0149	0.0276	0.0281	0.0364	0.024	0.0348	0.0243	0.078
SMIM12	1700	AT	4.2			0	1	0.1898	0.0232	0.9557	0.9659	0.956	0.9467	0.9781	0.944	0.9727	0.9546	0.9461	0.933	0.8837	0.9271	0.9055	0.9433	0.9673	0.9599	0.9509	0.958	0.9552	0.9582	0.9315	0.9495	0.9404	0.9352	0.9534	0.9352	0.9493	0.9272	0.9599	0.9133	0.9872	0.9669	0.9851	0.9724	0.9719	0.9636	0.976	0.9652	0.9757	0.922
SMIM12	1701	AD	1.3	1.2	4.1	0	0.9668	0.4354	0.0947	0.9268	0.9153	1	1	0.7354	1	1	1	1	0.9392	0.7118	1	1	0.9453	0.9153	0.7777		0.9215	0.8664	0.7875			0.7118	1	1		1		1		1	1	0.8309	0.9195	0.6837	0.93	0.8963	1	1	0.7241
SMIM12	1702	AD	1.2:1.3	1.1	4.1	0	0.9948	0.9845	0.0628	0.1638	0.1345	0.0654	0.0996	0.0785	0.0759	0.1937	0.1556	0.0815	0.226	0.0623	0.1095	0.1136	0.1288	0.0675	0.1108	0.0329	0.1237	0.1525	0.0839	0.0638	0.0452	0.144	0.117	0.0864	0.035	0.0564	0.0365	0.1197	0.102	0.1037	0.0827	0.0735	0.0831	0.0962	0.1004	0.1238	0.1181	0.0738	0.1215
SMIM12	1703	AD	1.2	1.1	4.1	0	0.9878	0.126	0.018	0.0169	0.0153	0	0	0.0253	0	0	0	0	0.022	0.0273	0	0	0.0083	0.0092	0.0319	0	0.0118	0.0272	0.0302	0	0	0.126	0	0	0.0163	0	0	0	0	0	0	0.0135	0.0108	0.04	0.0091	0.0151	0	0	0.0565
ZMYM6	1708	AP	1			0	0.9215	1	0.137	0.5661	0.7851	0.3758	0.2238	0.1482	0.1902	0.9164	0.5661		0.5324	0.7229	0.5258	0.2238	0.3934	0.3586	0.3799		0.2581	0.573	0.6705	0.6503		0.3851	0.3586	0.5279	0.5107	0.246		0.6618		0.4844		0.2072	0.4016	0.3948	0.4391	0.4979	0.7147	0.3699	0.2813
ZMYM6	1709	AP	2			0	0.9215	1	0.137	0.4339	0.2149	0.6242	0.7761	0.8518	0.8098	0.0836	0.4339		0.4676	0.2771	0.4742	0.7761	0.6066	0.6414	0.6201		0.7419	0.427	0.3295	0.3497		0.6149	0.6414	0.4721	0.4893	0.754		0.3382		0.5156		0.7928	0.5984	0.6052	0.5609	0.5021	0.2853	0.6301	0.7187
ZMYM6	1710	AT	18			0	1	0.3796	0.0516	0.4173	0.3148	0.3134	0.3716	0.2007	0.3891	0.0852	0.3714	0.2803	0.3408	0.3348	0.2941	0.3831	0.3687	0.3485	0.2724	0.3271	0.2932	0.3192	0.2786	0.212	0.2013	0.2601	0.3426	0.2518	0.2716	0.3066	0.3299	0.3815	0.3087	0.3107	0.3537	0.3019	0.2499	0.2441	0.3069	0.2524	0.2508	0.2938	0.2964
ZMYM6	1711	AT	6.2			0	1	0.2615	0.0393	0.0787	0.1633	0.1292	0.124	0.0975	0.0858	0.078	0.0828	0.0324	0.147	0.1267	0.181	0.0667	0.1057	0.0846	0.1685	0.0872	0.1382	0.148	0.1567	0.1083	0.0885	0.1011	0.1045	0.079	0.1122	0.087	0.0715	0.1187	0.0693	0.1098	0.0887	0.1236	0.2349	0.1554	0.1141	0.2121	0.1626	0.1005	0.1214
ZMYM6	1712	AT	20			0	1	0.4201	0.0471	0.504	0.5219	0.5575	0.5044	0.7018	0.5251	0.8368	0.5458	0.6874	0.5123	0.5385	0.5249	0.5502	0.5256	0.5669	0.5591	0.5857	0.5686	0.5328	0.5648	0.6797	0.7101	0.6387	0.5529	0.6691	0.6162	0.6063	0.5986	0.4998	0.622	0.5796	0.5576	0.5745	0.5151	0.6005	0.579	0.5355	0.5866	0.6057	0.5822
ZMYM4	1716	ES	10:11:00	9	12	0	0.993	0.0443	0.0033	1	1	1	1	1	1	1	1		1	1	1	1	1	1	1	1	1	1	1	1	1	1	1	1	1	1	1	1	1	1	1	1	1	1	1	1	1	1	1
KIAA0319L	1717	AP	12			0	0.9965	0.899	0.0685	0	0.0294	0.0136	0.0059	0.0246	0	0	0		0.0813	0.0091	0.0557	0.0786	0.0414	0.0542	0	0	0	0.0224	0.0243	0.1645	0.1385	0.0168	0.0168	0.0171	0.0403	0.0327	0	0.022	0.1267	0.112	0.2085	0	0.0237	0	0.0223	0	0	0.0714	0.0722
KIAA0319L	1718	AP	2.1			0	0.9965	0.922	0.0858	0.8382	0.8418	0.8942	0.854	0.7965	0.86	0.7296	0.8024		0.7707	0.8933	0.7956	0.74	0.8362	0.8594	0.886	0.8347	0.8994	0.8578	0.8633	0.7236	0.6597	0.7952	0.812	0.7335	0.764	0.7452	0.9075	0.7005	0.627	0.6158	0.6899	0.6934	0.8747	0.9561	0.8763	0.8803	0.7581	0.8245	0.8276
KIAA0319L	1719	AP	1			0	0.9965	0.4425	0.0582	0.1618	0.1288	0.0922	0.1401	0.179	0.14	0.2704	0.1976		0.1481	0.0976	0.1487	0.1814	0.1224	0.0865	0.114	0.1653	0.1006	0.1198	0.1124	0.1119	0.2018	0.188	0.1713	0.2493	0.1957	0.2222	0.0925	0.2775	0.2463	0.2721	0.1017	0.3066	0.1017	0.0439	0.1013	0.1197	0.2419	0.1041	0.1002
KIAA0319L	1723	AA	10.1	9	10.2	0	0.9843	0.0801	0.0095	0.9829	1	1	1	1	1	1	0.9773	1	1	1	0.9904	0.9791	1	1	1	1	0.9889	1	1	1	0.9451	1	1	0.9859	1	0.9826	1	1	1	1	1		1	1	1	1	1	1	1
KIAA0319L	1724	ES	7	6	8	0	0.9983	0.0555	0.0065	0.9903	1	0.9906	0.9906	1	1	1	1	1	1	1	1	1	0.9943	1	1	1	1	0.9962	0.9712	1	1	1	1	1	1	1	1	1	1	1	1	1	0.9971	0.9769	1	0.9864	0.9811	1	1
KIAA0319L	1725	ES	4	3	5	0	1	0.2444	0.0244	0.987	0.9688	0.9666	0.9748	0.9824	1	1	0.9789	1	0.9907	0.9557	0.9766	0.9699	0.96	0.9593	0.9854	1	0.9918	0.9695	0.9643	0.9902	1	1	0.9398	0.9667	0.9913	1	1	1	1	1	1	1	0.9677	0.9406	0.9664	0.9285	0.9278	0.941	0.9921
KIAA0319L	1726	AD	2.2	2.1	3	0	0.9093	0.3726	0.0258	0	0	0.0333	0.0277	0.0426	0	0	0		0	0	0.0333	0.0253	0	0	0	0	0	0	0	0		0	0	0.0818	0.0126	0	0	0					0	0	0	0			0.0209
NCDN	1727	AD	1.2:1.3	1.1	2	0	0.9913	0.2185	0.0114	1	1	1	1	1	1	1	1		1	1	1	1	1	1	1	1	1	1	1	1	1	1	1	1	1	1	1	1	1	1	1	1	1	1	1	1	1	1	1
NCDN	1728	ES	1.3	1.1	2	0	0.8935	0.1558	0.0106	1	1	1	1	1	1	1	1		1	1	1	1	1	1	1	1	1	1	1	1		1	1	1	1	1		1					1	1	1	1	1		1
NCDN	1729	RI	1.2	1.1	1.3	0	0.9843	0.8036	0.1365	0.6244	0.6393	0.5329	0.7137	0.5373	0.4611	0.6875	0.4583		0.5973	0.4044	0.5779	0.6725	0.6012	0.6492	0.5973	0.7289	0.5467	0.5154	0.6656	0.806	1	0.6471	0.5678	0.8655	0.8809	0.6751	1	0.5095	0.7404		0.4986		0.7299	0.55	0.5535	0.5144	0.7172		0.4444
CLSPN	1730	AT	25			0	1	0.8402	0.1877	0.2107	0.6408	0.4369	0.4424	0.6844	0.3719	0.6185	0.4675	0	0.5632	0.3385	0.6973	0.2446	0.4747	0.6229	0.3469	0.2908	0.5192	0.5783	0.592	0.758	0.177	0.6328	0.0699	0.6405	0.483	0.5266	0.47	0.488	0.3903	0.2079	0.3388	0.3037	0.6425	0.2057	0.3745	0.6526	0.7176	0.4675	0.5705
CLSPN	1731	AT	26			0	1	0.8402	0.1877	0.7893	0.3592	0.5631	0.5576	0.3156	0.6281	0.3815	0.5325	1	0.4368	0.6615	0.3027	0.7554	0.5253	0.3771	0.6531	0.7092	0.4808	0.4217	0.408	0.242	0.823	0.3672	0.9301	0.3595	0.517	0.4734	0.53	0.512	0.6097	0.7921	0.6612	0.6963	0.3575	0.7943	0.6255	0.3474	0.2824	0.5325	0.4295
AGO1	1734	AP	1			0	0.8028	0.9338	0.1158	0	0	0	0	0	0	0	0		0	0	0.2235	0	0	0.0671	0	0	0	0.5454	0	0.9338			0	0		0	0						0	0	0	0	0		0
AGO1	1735	AP	2			0	0.8028	0.9338	0.1158	1	1	1	1	1	1	1	1		1	1	0.7765	1	1	0.9329	1	1	1	0.4546	1	0.0662			1	1		1	1						1	1	1	1	1		1
AGO3	1739	AT	7.2			0	1	0.4048	0.0639	0.0628	0.1321	0.0706	0.1101	0.0302	0.0847	0.044	0.1503	0.2634	0.051	0.1087	0.0966	0.0717	0.0826	0.0203	0.0558	0.1152	0.0675	0.1126	0.0468	0.0862	0.23	0.1703	0.0486	0.0672	0.1629	0.1605	0.0942	0.0637	0.1243	0.1495	0.1763	0.0513	0.0532	0.0134	0.2289	0.107	0.1085	0.1647	0.1428
AGO3	1740	AT	8			0	1	0.6582	0.1091	0.1483	0.3649	0.163	0.1471	0.2536	0.127	0.4965	0.2881	0.0614	0.238	0.3491	0.2101	0.1095	0.1867	0.2126	0.2733	0.2418	0.3147	0.23	0.3731	0.3548	0.2896	0.1599	0.2039	0.2169	0.4261	0.2779	0.3363	0.3073	0.2809	0.3468	0.4516	0.6582	0.2333	0.4489	0.1222	0.3146	0	0.3266	0.2664
AGO3	1741	AT	22			0	1	0.6744	0.1208	0.789	0.503	0.7664	0.7428	0.7162	0.7883	0.4595	0.5616	0.6751	0.7109	0.5422	0.6933	0.8188	0.7307	0.7672	0.6709	0.6431	0.6179	0.6573	0.5801	0.559	0.4804	0.6698	0.7475	0.7159	0.4111	0.5616	0.5695	0.629	0.5948	0.5037	0.3721	0.2905	0.7135	0.5377	0.649	0.5784	0.8915	0.5086	0.5908
AGO3	1742	ES	6	5	9	0	0.8674	0.2292	0.0214		1	1	1	1	1	1			1	1	1	1	1	1	1	1	1	1	1	1		1	1	1	1	1		1				1	1	1	1	1	1		1
AGO3	1743	ES	4	3	5	0	0.9389	0.3016	0.0324	1	1	1	1	1		1	1		1	1	1	1	1	1	1	1	0.9412	1	1	1	1	1	1	1	1	1		1	1	1	0.8366	1	0.9653	1	1	1	1	1	0.9477
COL8A2	1749	AD	3.2	3.1	4	0	0.8604	0.4982	0.0457	1	1	1	1	1	1		0.8968		1	1	1	1	0.9655	1	1	1	1	1	1	1		1		1	1	0.8718							0.9922		1	1			1
TRAPPC3	1752	ES	4	3	5	0	1	0.4884	0.0427	0.024	0.0214	0.0142	0.0457	0.011	0.0507	0.0849	0.0243	0.027	0.031	0.0373	0.0354	0.0737	0.044	0.0207	0.0157	0.0139	0.0164	0.0217	0.0166	0.0457	0.0643	0.0532	0.0333	0.0314	0.068	0.0295	0.0227	0.0356	0.0637	0.0049	0.0323	0.0076	0.0082	0.0028	0.0326	0.0051	0.0032	0.0115	0.0682
TRAPPC3	1753	AD	1.3	1.2	2	0	0.986	0.2936	0.0355	1	1	1	0.9574	1	1		0.9233	1	0.9551	1	1	1	1	1	1	1	0.9673	1	0.9335	1	1	1	1	0.9502	0.9445	1	1	1	1	1	1	1	0.9313	0.9105	0.9739	1	1	1	0.8994
TRAPPC3	1754	AD	1.2:1.3	1.1	2	0	1	0.5068	0.0537	0.1459	0.0918	0.1237	0.1352	0.0603	0.2649	0.0435	0.1499	0.0494	0.3024	0.1997	0.1386	0.1741	0.1711	0.1288	0.1443	0.141	0.2127	0.2249	0.1015	0.1673	0.1867	0.0763	0.0991	0.1947	0.1817	0.1059	0.0735	0.1808	0.1847	0.1047	0.1481	0.1104	0.2058	0.1131	0.137	0.1396	0.1572	0.0983	0.1734
TRAPPC3	1755	AD	1.2	1.1	2	0	1	0.0625	0.0081	0	0	0	0.007	0	0	0	0.015	0	0.0216	0	0	0	0	0	0	0	0.0132	0	0.009	0	0	0	0	0.0192	0.0174	0	0	0	0	0	0	0	0.024	0.016	0.0061	0	0	0	0.0251
MAP7D1	1756	AP	9			0	0.9843	0.9792	0.1419	0.0701	0	0.128	0.2214	0.0383	0.2178	0.3519	0.1276	0.2318	0.2269	0.2682	0.42	0.2211	0.2074	0.136	0.216	0.2658	0.147	0.0752	0.1061	0.1016	0.4857	0.4689	0.3803	0.1234	0.42	0.2443	0	0.3086	0.2178	0.3409			0.13	0.1756	0.1687	0.0975	0.0309	0.2658	0.1311
MAP7D1	1757	AP	1			0	0.9843	0.9792	0.1419	0.9299	1	0.872	0.7786	0.9617	0.7822	0.6481	0.8724	0.7682	0.7731	0.7318	0.58	0.7789	0.7926	0.864	0.784	0.7342	0.853	0.9248	0.8939	0.8984	0.5143	0.5311	0.6197	0.8766	0.58	0.7557	1	0.6914	0.7822	0.6591			0.87	0.8244	0.8313	0.9025	0.9691	0.7342	0.8689
MAP7D1	1758	AA	15.1	14	15.2	0	1	0.2165	0.0262	0.1078	0.1046	0.0778	0.1326	0.051	0.094	0.1078	0.0779	0.0554	0.0744	0.0501	0.0469	0.0901	0.0757	0.1207	0.098	0.0808	0.0869	0.0866	0.0847	0.0343	0.1078	0.0975	0.043	0.1036	0.0983	0.0746	0.097	0.0517	0.0668	0.1009	0.0396	0.0971	0.0884	0.0823	0.0751	0.0818	0.075	0.0936	0.044
MAP7D1	1759	AA	11.1	10	11.2	0	0.9808	0.225	0.0342	0.9843	0.9819	0.8929	0.9481	0.9729	0.9007	0.8762	0.9286	0.8893	0.9414	0.9332	0.964	1	0.9296	0.9402	0.9127	0.9323	0.9186	0.9569	0.8927	1	0.9323	0.9625	0.9729	0.9184	0.903	0.9559	1	0.8906	0.9367	0.965	0.915	1	0.9067	0.8756	0.9018	0.964	0.966	0.9866	0.934
MAP7D1	1760	RI	7.2	7.1	7.3	0	0.9668	0.8394	0.1278	0.5543	0.7144	0.6005	0.5274	0.5694	0.4556	0.401	0.4791	0.7493	0.7642	0.4672	0.8271	0.4704	0.5937	0.5923	0.5274	0.3235	0.626	0.5089	0.5306	0.4889	0.4689	0.401	0.5965	0.5893	0.4798	0.5656	0.7051	0.7416	0.6728				0.6745	0.6085	0.7051	0.9054	0.7852	0.3705	0.7051
MAP7D1	1761	ES	6	5	7.1	0	1	0.6506	0.0725	0.7958	0.7408	0.7375	0.7245	0.7467	0.6465	0.892	0.7148	0.7086	0.7484	0.7688	0.6618	0.8384	0.784	0.8534	0.7789	0.6451	0.7775	0.8556	0.8363	0.5013	0.7467	0.7248	0.7558	0.6853	0.5769	0.6987	0.644	0.6661	0.5551	0.6982	0.6732	0.7886	0.6644	0.7448	0.7905	0.6565	0.6046	0.7177	0.6809
THRAP3	1762	ES	2	1	3	0	0.9476	1	0.0797	0.0838	0.0244	0.0343	0.0273	0.0331	0		0.0083		0.0217	0.0217	0.1667	0.0884	0.1542	0.0099	0.0645	0.0244	0.0404	0.0189	0.0541	0.0952		0.0141	0.086	0.0693	0.0909	0.1772		0.0099					0.0296	0	0.0083	0	0.0052		0.0094
SH3D21	1765	AT	16.2			0	0.9825	0.8736	0.1787	0.2262	0.3067	0.2457	0.4199	0.2978	0.3573	0.0929	0.2118	0.2843	0.4718	0.1258	0.2599	0.325	0.4162	0.5205	0.3567	0.5714	0.2831	0.2726	0.5897	0.3019	0.5809	0.1098	0.7308	0.4551	0.3677	0.3841	0.5523	0.4618	0.3636	0.2533	0.1445	0.1485	0.1961	0	0.5758	0.6786	0.2222	0.3596	0.125
SH3D21	1766	AT	19			0	0.9825	0.8736	0.1787	0.7738	0.6933	0.7543	0.5801	0.7022	0.6427	0.9071	0.7882	0.7157	0.5282	0.8742	0.7401	0.675	0.5838	0.4795	0.6433	0.4286	0.7169	0.7274	0.4103	0.6981	0.4191	0.8902	0.2692	0.5449	0.6323	0.6159	0.4477	0.5382	0.6364	0.7467	0.8555	0.8515	0.8039	1	0.4242	0.3214	0.7778	0.6404	0.875
SH3D21	1767	ES	12:13:00	11	14	0	0.9703	0.3089	0.0512	0.9773	0.9372	1	1	0.8439	1	0.9428	1	0.8533	0.9296	1	0.9536	0.9369	1	1	1	0.914	1	0.9755	1	0.9751	1	1	1	1	1	0.9631	0.7489	0.9629	0.8637	1	1		1	1	1	0.8734	0.8868	1	1
SH3D21	1768	ES	07:08:00	6	9	0	0.9442	0.4399	0.0648	0.9284	1	0.9257	1	1	1	0.5601	0.8708	1	0.8578	1	0.9432	1	1	0.9681	0.9576	1	1	0.9729	0.834	0.9847	0.9241	1	1	0.9751	1	0.9533	0.8398	1	1	1	1		0.9251	1	0.8642	1		1	1
SH3D21	1769	ES	5	4.2	6	0	0.8988	0.2027	0.0324	0.963	1	1	1	1	1	1	1	1	1	1	0.9001	0.9667	1	1	1	1	1	1	1	0.9836	1	1	1	1	1	0.9697		1	1	0.8551	1		1	1	1	1		1	1
STK40	1772	RI	11.2	11.1	11.3	0	0.9983	1	0.0575	0.0573	0.0321	0.039	0.0691	0.0331	0.1101	0.1312	0.0811	0.0503	0.1306	0.1396	0.1458	0.1536	0.0829	0.036	0.0281	0.0318	0.0353	0.0611	0.0525	0.1326	0.1282	0.0379	0.0935	0.0327	0.1032	0.1064	0.091	0.0755	0.1117	0.1032	0.1124	0.1141	0.0136	0.0216	0.0643	0.0214	0.0201	0.0147	0.0424
STK40	1773	AA	4.1	3	4.2	0	0.9843	0.379	0.0304	0.0344	0.0312	0.0438	0	0	0.0825	0.0622	0.0382		0.1035	0.043	0.0307	0	0.0371	0.0184	0.0238	0.0366	0.0272	0.0218	0.0132	0	0	0.0904	0.1246	0	0.0492	0.026		0.0238	0	0		0	0.0301	0	0.0113	0.0312	0.0575	0	0.0539
STK40	1774	ES	2	1	3	0	0.9948	0.8099	0.1276	0.5105	0.229	0.5014	0.5222	0.4155	0.2653	0.8359	0.4333		0.5916	0.4086	0.5357	0.5946	0.5186	0.599	0.3612	0.4105	0.5855	0.4866	0.5337	0.5796	0.619	0.467	0.2924	0.5786	0.569	0.4698	0.4866	0.5199	0.3513	0.2131	0.7676	0.4233	0.6196	0.5462	0.7283	0.3999	0.6377	0.3823	0.6286
OSCP1	1775	AP	1			0	0.993	0.5751	0.0311	1	1	0.9888	1	1	1	1	1	1	1	1	0.9343	0.9902	1	1	1	1	1	0.9924	1	0.9514	1	1	1	1	1	1	1	1	1	1	1	1	1	1	1	1	1	1	0.9606
OSCP1	1776	AP	3			0	0.993	0.5751	0.0311	0	0	0.0112	0	0	0	0	0	0	0	0	0.0657	0.0098	0	0	0	0	0	0.0076	0	0.0486	0	0	0	0	0	0	0	0	0	0	0	0	0	0	0	0	0	0	0.0394
OSCP1	1777	AT	7			0	0.9965	0.7396	0.131	0.2202	0.2986	0.1945	0.3446	0.2687	0.5887	0.5093	0.2822	0.1274	0.4699	0.4608	0.4138	0.2684	0.3793	0.3468	0.2719	0.1356	0.4211	0.2548	0.6903	0.3855	0.6754	0.3552	0.3242	0.3661	0.3632	0.4737	0.441	0.1453	0.3047	0.32	0.585	0.1821	0.3735	0.2531	0.4196	0.435		0.4611	0.435
OSCP1	1778	AT	13.2			0	0.9965	0.7396	0.131	0.7798	0.7014	0.8055	0.6554	0.7313	0.4113	0.4907	0.7178	0.8726	0.5301	0.5392	0.5862	0.7316	0.6207	0.6532	0.7281	0.8644	0.5789	0.7452	0.3097	0.6145	0.3246	0.6448	0.6758	0.6339	0.6368	0.5263	0.559	0.8547	0.6953	0.68	0.415	0.8179	0.6265	0.7469	0.5804	0.565		0.5389	0.565
OSCP1	1779	ES	11.2:12:13.1	11.1	13.2	0	0.9948	0.0533	0.0039	1	1	1	1	1	1	1	1	1	1	1	1	1	1	1	1	1	1	0.9939	1	1	1	1	1	1	1	1	1	1	1	1	1	1	1	1	1	1	1	1	1
OSCP1	1780	ES	2	1	4	0	0.9284	0.1716	0.0258	0.0445	0.1716	0	0.0144	0	0		0		0.0963	0	0	0	0.0432	0	0.0251	0	0.0585	0.0153	0	0	0.0887		0	0	0	0		0	0.0635	0			0.0119	0	0	0		0	0
CSF3R	1786	RI	17.3	17.2	17.4	0	1	0.135	0.0103	1	1	1	0.9956	1	1	1	0.9883	1	1	0.9895	1	0.9831	1	0.9849	1	1	0.9925	0.99	0.9836	0.9704	0.991	0.9826	0.9908	0.9921	1	0.9959	0.9873	1	1	0.9858	1	1	1	0.9965	0.9895	0.9976	1	1	1
CSF3R	1787	AA	17.1	16	17.2	0	0.9267	0.3846	0.0505	0.1283	0.076	0.1289	0.1103	0.0547	0.0623	0.3058	0.1202	0.1272	0.0865	0.0967	0.1399	0.0919	0.0889	0.0742	0.121		0.0824	0.0724	0.1219	0.1152	0.0257	0.187	0.1235	0.1135	0.0495	0.1316	0.1724	0.2066	0.2244	0.0742			0.0495	0.1819	0.1109	0.105		0.0842	0.2239
CSF3R	1788	ES	15	14	16	0	0.993	0.0328	0.0022	1	1	1	1	1	1	1	1	1	1	1	1	1	1	1	1	1	1	1	1	1	1	1	1	1	1	1	1	1	1	1	1	1	1	1	1	1	1	1	1
MEAF6	1792	AP	2.1			0	1	0.6258	0.0304	0.0059	0.0028	0	0.0023	0.0062	0.0025	0.0149	0.0063	0	0	0.002	0.0072	0.0061	0.0016	0.0041	0.0045	0	0.001	0.0033	0.0076	0.0055	0	0	0.0118	0.0028	0.0091	0	0.0037	0.0015	0.002	0	0	0	0.0007	0	0.0016	0.0021	0	0	0.0017
MEAF6	1793	AP	1			0	1	0.6258	0.0304	0.9941	0.9972	1	0.9977	0.9938	0.9975	0.9851	0.9937	1	1	0.998	0.9928	0.9939	0.9984	0.9959	0.9955	1	0.999	0.9967	0.9924	0.9945	1	1	0.9882	0.9972	0.9909	1	0.9963	0.9985	0.998	1	1	1	0.9993	1	0.9984	0.9979	1	1	0.9983
MEAF6	1794	AT	8.2			0	1	0.0974	0.0059	0	0	0.0237	0	0	0	0	0	0	0	0.0088	0.0048	0.0069	0	0.0078	0	0	0.0169	0.0068	0	0	0	0	0	0	0.0041	0	0	0	0	0	0	0.0087	0	0	0	0	0	0	0
MEAF6	1795	AT	9.2			0	1	0.0974	0.0059	1	1	0.9763	1	1	1	1	1	1	1	0.9912	0.9952	0.9931	1	0.9922	1	1	0.9831	0.9932	1	1	1	1	1	1	0.9959	1	1	1	1	1	1	0.9913	1	1	1	1	1	1	1
MEAF6	1799	ES	7:8.1:9.1	5	9.2	1	0.9599	0.3727	0.0666	0.7619	0.9262	0.8659	0.7475	0.9323	0.8221	0.875	0.8702	0.7868	0.8809	0.782	0.8685	0.9221	0.8213	0.8306	0.942	0.8802	0.8765	0.8764	0.9193	0.7863	0.7033	0.8829	0.8155	0.7965	0.8736	0.9313	0.8541	0.8564	0.8897	0.7181	0.7135	0.8241	0.849	0.8928	0.7898	0.8382	0.7208	0.7776	0.9118
MEAF6	1801	ES	8.1:9.1	5	9.2	0	1	0.1709	0.0204	0.9658	0.9846	0.9671	0.959	0.9883	0.963	0.9644	0.9695	0.9425	0.966	0.9799	0.9811	0.9924	0.9531	0.9733	0.9938	0.9912	0.9847	0.9904	0.9939	0.9519	0.9418	0.9722	0.9592	0.9318	0.9879	0.9911	0.9664	0.9705	0.971	0.9478	0.9606	0.9755	0.9818	0.9911	0.9485	0.9792	0.9526	0.9421	0.9908
MEAF6	1802	ES	6	5	7	1	0.8761	0.8856	0.0924		0.5582	0	0	0	0	0.0853	0.0359	0	0.0174		0.0663		0.0209	0.0209	0.0359		0	0	0.1227	0		0	0	0	0	0.0585		0.1106	0.0694	0		0	0	0	0		0	0	0
MEAF6	1803	ES	06:07:00	5	8.1	0	1	0.382	0.0309	0.0068	0.2022	0	0	0	0	0.025	0.0081	0	0.0046	0.0086	0.0087	0	0.0046	0.0028	0.0038	0	0	0	0.0094	0	0	0	0	0	0	0.0074	0	0.0233	0.0163	0	0.037	0	0	0	0	0	0	0	0
MEAF6	1804	ES	7	5	8.1	1	0.9895	0.4356	0.0597	0.1076	0.1708	0.195	0.1197	0.1539	0.1599	0.2324	0.1826	0.1964	0.2137	0.0732	0.1192	0.0874	0.1915	0.1246	0.0977	0.0636	0.1036	0.0664	0.0689	0.1631	0.1372	0.1882	0.172	0.228	0.0826	0.1153	0.1791	0.1641	0.1987	0.131	0.0994	0.1103	0.0988	0.0744	0.1789	0.1041	0.1206	0.1844	0.093
MEAF6	1805	ES	6	5	8.1	0	1	0.6107	0.0476	0.0034	0.5139	0.0137	0	0	0	0	0	0	0.003	0	0	0	0.0027	0	0.0028	0	0	0.0044	0.0057	0	0	0	0.0062	0	0	0.0046	0	0	0.0082	0	0	0.0194	0	0	0.0046	0.0053	0	0.0064	0
DNALI1	1806	ES	3	2	4	0	0.9791	0.5633	0.0723	0.9284	0.9491	1	0.9889	1	0.812	1	0.9832	0.9857	0.9466	1	0.9418	0.9021	0.9906	0.9883	0.9767	0.8987	0.9366	1	1	1	0.9413	1	0.6824	0.9892	0.9665	0.968	0.9762	1	0.9796	1	1	0.91	0.9767	1	0.982	0.9881	1	0.9516	0.8807
C1orf109	1814	AP	3.1			0	0.9634	0.6452	0.1082	0.7719	0.8327	0.9098	0.8159	0.625	0.7857	0.6814	0.773		0.8315	0.6608	0.7759	0.5983	0.6707	0.7359	0.6942	0.7196	0.7438	0.7993	0.7249	0.8514		0.5893	0.7333	0.6962	0.5946	0.6471	0.8652	0.8462		0.8919	0.81	0.81	0.6556	0.7746	0.7282	0.7947	0.9386	0.6814	0.9252
C1orf109	1815	AP	1			0	0.9634	0.6452	0.1082	0.2281	0.1673	0.0902	0.1841	0.375	0.2143	0.3186	0.227		0.1685	0.3392	0.2241	0.4017	0.3293	0.2641	0.3058	0.2804	0.2562	0.2007	0.2751	0.1486		0.4107	0.2667	0.3038	0.4054	0.3529	0.1348	0.1538		0.1081	0.19	0.19	0.3444	0.2254	0.2718	0.2053	0.0614	0.3186	0.0748
C1orf109	1816	AA	6.1	5	6.2	0	0.8778	0.4586	0.0639	0.0901	0	0.0648	0			0.114	0.1334		0	0.0456	0.0281	0.1402	0.0442	0.0428	0.0546		0	0.0392	0.1721	0.0472		0.316	0	0.224	0.1402	0.1035		0.0619		0	0.1887	0.1301	0.0472	0.115	0.0305	0	0.0392	0.0797	0.026
C1orf109	1817	AD	4.3	4.2	5	0	0.9668	0.1852	0.0269	1	1	1	0.9635	0.8148	0.891	1	1		0.9719	0.9737	1	1	1	1	0.9488	0.9144	1	0.9608	0.9714	1		1	1	1	1	1	1	0.9659	1	1	1	0.9516	1	0.9679	1	1	1	1	0.9828
CDCA8	1821	RI	1.2	1.1	1.3	0	0.8307	0.6271	0.1167	0.7173	0.8236	0.8017	0.9004	0.7625	0.9401	0.9151	0.9004		0.7479	0.517	0.8122	0.7603	0.9146	0.7655	0.8395		0.7251	0.6118	0.8004	0.5678		0.909		0.8354	0.6555	0.7235		0.941	0.7405	0.909	1	0.7381	0.749	0.3729	0.7351	0.7993	0.9625	0.8048	0.6247
EPHA10	1825	AT	21			0	0.9983	0.4015	0.0842	0	0	0	0.0589	0.1104	0	0.1705	0	0.1194	0.0569	0.0784	0	0.045	0.0894	0.0674	0.0349	0.2019	0	0.1081	0	0.1544	0.1705	0.2971	0	0	0.1806	0	0	0	0.1227	0	0	0	0.0641	0	0.2034	0	0	0	0
EPHA10	1826	AT	3.2			0	0.9983	0.4015	0.0842	1	1	1	0.9411	0.8896	1	0.8295	1	0.8806	0.9431	0.9216	1	0.955	0.9106	0.9326	0.9651	0.7981	1	0.8919	1	0.8456	0.8295	0.7029	1	1	0.8194	1	1	1	0.8773	1	1	1	0.9359	1	0.7966	1	1	1	1
EPHA10	1828	RI	19.3	19.2	19.4	0	0.9738	0.0805	0.0048	0.9451	1	1	1	1	1	1	1	1	1	1	1	1	1	1	1	1	1	1	1	1	1	1	1	1	1	1		1	1	1	1		1	1	1	1		1	1
EPHA10	1829	RI	19.2:19.3	19.1	19.4	0	0.9738	0.2645	0.0156	1	1	1	1	1	1	1	0.9583	1	1	1	1	1	1	1	1	1	1	0.9867	1	1	1	1	1	1	1	1		1	1	1	1		1	1	1	1		1	1
MANEAL	1833	AP	1			0	0.9721	0.4754	0.0299	1	0.9873	1	1	1	1	1	1	1	1	1	1	1	0.9918	1	1	1	1	0.9828	1	0.8664	1	1	1	1	1	1		1	1	1	1		1	1	1	0.9707	1	1
MANEAL	1834	AP	2.1			0	0.9721	0.4754	0.0299	0	0.0127	0	0	0	0	0	0	0	0	0	0	0	0.0082	0	0	0	0	0.0172	0	0.1336	0	0	0	0	0	0		0	0	0	0		0	0	0	0.0293	0	0
MANEAL	1835	AA	4.1	3	4.2	0	0.9773	0.7684	0.1101	0.6961	0.753	0.7621	0.7921	0.6608	0.7414	1	0.8913	0.4393	0.8173	0.7725	0.6923	0.7728	0.8077	0.8541	0.7744	0.8414	0.7461	0.7495	0.7474	0.6528	0.6821	0.6727	0.6439	0.8015	0.8117	0.8226		0.6153	0.7451	0.5252	0.7354		0.738	0.6334	0.8045	0.6761	0.6521	0.6969	0.5701
MANEAL	1836	ES	3	2.3	4.1	0	0.9127	0.4386	0.0659	0.878	0.9915	0.9032	1	0.9036	1	1	0.9057		0.9028	0.9393		0.9046	0.9579	1	0.8981	1	0.96	0.9363	1	1	1	0.7068	1	0.9689	0.91	0.9629		0.7244	1	1			0.8992	1	0.9205	0.9436	0.8677	0.9237
C1orf122	1841	RI	1.2:1.3	1.1	1.4	0	0.9511	0.2733	0.0257	0.0154	0.0502	0.0341	0.0285	0.0139	0.0326	0	0.0039	0.011	0.0326	0.0093	0.0659	0.1279	0	0.0091	0	0.0087	0	0	0	0.0401	0.0314	0.0541	0.0543	0.0266	0.0265	0.0383	0.0687	0.0429	0.009	0	0.0101	0.0542	0.0023	0.0044	0.0023	0.01	0.025	0.0023	0.0093
C1orf122	1842	AD	1.2	1.1	1.4	0	0.9511	0.1928	0.031	0	0.0586	0	0	0.0118	0.0212	0	0.0055	0.0864	0	0.0131	0.1223	0	0.0489	0.0086	0.0318	0.0123	0.0284	0.0418	0	0	0.0496	0.0159	0.0557	0.0879	0.0133	0.0212	0.0278	0	0.0603	0	0.0142	0.0262	0.0033	0.0062	0.0033	0.014	0.0178	0.0032	0.0131
INPP5B	1848	AT	7.3			0	1	0.4487	0.0486	0.0919	0.1103	0.0876	0.1203	0.0767	0.1119	0.0854	0.1161	0.2069	0.0963	0.1977	0.1157	0.1086	0.1136	0.0757	0.1391	0.0703	0.1328	0.0874	0.0945	0.1553	0.0974	0.0944	0.1325	0.0827	0.0914	0.0852	0.1225	0.124	0.1142	0.0602	0.0913	0.1482	0.0811	0.085	0.0978	0.1242	0.0703	0.0561	0.1161
INPP5B	1849	AT	24			0	1	0.4487	0.0486	0.9081	0.8897	0.9124	0.8797	0.9233	0.8881	0.9146	0.8839	0.7931	0.9037	0.8023	0.8843	0.8914	0.8864	0.9243	0.8609	0.9297	0.8672	0.9126	0.9055	0.8447	0.9026	0.9056	0.8675	0.9173	0.9086	0.9148	0.8775	0.876	0.8858	0.9398	0.9087	0.8518	0.9189	0.915	0.9022	0.8758	0.9297	0.9439	0.8839
INPP5B	1850	AA	16.1	15	16.2	0	0.8988	1	0.1282	0.0612	0.4612	0.2972	0.2459	0.0854	0.041	0	0.2551		0.5654	0.3201	0.2796	0.4183	0.4122	0.232	0.1609	0.2551	0.1994	0.2675	0.1462	0.6815		0.1654	0.3393	0.4382	0.1906	0.0982	0.1704	0.7056	0.0891	0.3539		0.3273	0.0754	0.0932	0.1933	0.1933			0.4641
INPP5B	1851	ES	13	12	14	0	0.9895	0.2996	0.024	1	1	1	1	1	1	1	1		0.9741	1	1	1	1	0.9461	1	1	0.9674	0.986	1	1	1	1	0.9577	1	1	1	1	1	1	1		1	0.9843	1	1	1	1	1	0.9803
INPP5B	1852	AD	7.2	7.1	8	0	0.815	0.9711	0.2352	0.3945	0.547	0.3492	0.5414	0.4459	0.309		0.3764		0.5015	0.6356	0.5176	0.8157	0.3317	0.6525	0.556		0.4593	0.8078	0.4658	1		1	0.6356	0.7128	0.7772	0.8285							0.6264	0.3492	0.5961	0.1926	0.3492		0.2115
SF3A3	1853	ES	03:04:00	2	5	0	1	0.0942	0.0135	0.9643	0.9686	0.9847	0.9666	0.9858	0.9867	1	0.9889	0.9701	0.988	0.9887	0.9888	0.9767	0.9914	0.9794	0.978	0.9687	0.9881	0.9872	0.9923	1	0.9058	1	0.9885	0.9898	0.9642	0.986	1	0.9896	0.9823	1	0.9205	0.9444	0.9854	1	0.9813	0.9736	0.9887	1	0.9822
UTP11L	1854	ES	6	5	7	0	1	0.0224	0.0026	1	1	1	1	1	1	1	1	1	1	1	0.9925	1	1	1	1	1	1	1	1	0.9962	1	1	1	1	1	1	1	1	1	1	0.9938	0.9967	1	1	1	1	0.9947	1	1
GJA9	1855	AP	1			0	0.7818	0.9011	0.159	0.6871	0.4676	0.6372	0.7583	0.7249	0.5394	1	0.7694	0.8509	0.3451	0.4848	0.7008	0.7901	0.8541	0.8327	0.7249	0.5842		0.7784	0.7671		0.6009	0.7308	0.9022	0.5394	0.8327	0.849	0.8754	0.9231	0.8754	0.8285	0.7982		0.8806	0.7981	0.8959			0.8877
GJA9	1856	AP	2.1			0	0.7818	0.9011	0.159	0.3129	0.5324	0.3628	0.2417	0.2751	0.4606	0	0.2306	0.1491	0.6549	0.5152	0.2992	0.2099	0.1459	0.1673	0.2751	0.4158		0.2216	0.2329		0.3991	0.2692	0.0978	0.4606	0.1673	0.151	0.1246	0.0769	0.1246	0.1715	0.2018		0.1194	0.2019	0.1041			0.1123
GJA9	1857	AT	2.3			0	0.8394	0.5314	0.0961	0.145	0.2027	0.0701	0.1238	0.0701	0.0407	0.2532	0.0236	0.0781	0.0565	0.1194	0.263	0.0945	0.05	0.0442	0.2134	0.0829	0.1015	0.1585	0.2027	0.3676	0.1353	0.2087	0.2371	0.1764	0.0753	0.0656	0.1623	0.1015	0.0677	0.0781		0	0.0428		0.1085			0.1069	0.1749
GJA9	1858	AT	7			0	0.8394	0.5314	0.0961	0.855	0.7973	0.9299	0.8762	0.9299	0.9593	0.7468	0.9764	0.9219	0.9435	0.8806	0.737	0.9055	0.95	0.9558	0.7866	0.9171	0.8985	0.8415	0.7973	0.6324	0.8647	0.7913	0.7629	0.8236	0.9247	0.9344	0.8377	0.8985	0.9323	0.9219		1	0.9572		0.8915			0.8931	0.8251
RHBDL2	1859	AP	1			0	0.9983	0.9729	0.2076	0.8668	0	0.7359	0.7869	0.843	0.6207	0.3642	0.8529	0.3059	0.8059	0.7868	0.5868	0.6536	0.9188	0.8706	0.8698	0.8917	0.8737	0.8112	0.6962	0.3231	0.6141	0.6238	0.5888	0.8347	0.6336	0.6906	0.5486	0.8645	0.8112	0.8435	0.4062	0.1512	0.9369	0.8277	0.7746	0.8514	0.8514	0.5814	0.661
RHBDL2	1860	AP	3			0	0.9983	0.9729	0.2007	0.1191	1	0.2641	0.2131	0.157	0.3793	0.6358	0.1471	0.6941	0.1941	0.2132	0.4132	0.3464	0.0749	0.1294	0.1302	0.1083	0.1263	0.1888	0.3038	0.6769	0.3859	0.3762	0.4112	0.1653	0.3664	0.3094	0.4514	0.1355	0.1888	0.1565	0.5939	0.8488	0.0631	0.1723	0.2254	0.1486	0.1486	0.4186	0.339
RHBDL2	1861	AP	2			0	0.9983	0.4506	0.0349	0.0141	0	0	0	0	0	0	0	0	0	0	0	0	0.0063	0	0	0	0	0	0	0	0	0	0	0	0	0	0	0	0	0	0	0	0	0	0	0	0	0	0
RHBDL2	1862	AT	5.2			0	1	0.2714	0.0313	0.0181	0.1946	0	0	0	0	0	0	0.0251	0.0166	0.0269	0.0647	0	0.0048	0.0078	0	0	0	0	0	0	0.0141	0.0105	0.0291	0.0209	0	0.0135	0	0	0.02	0	0	0.0688	0	0.0235	0.0056	0	0	0	0.0463
RHBDL2	1863	AT	10			0	1	0.2714	0.0313	0.9819	0.8054	1	1	1	1	1	1	0.9749	0.9834	0.9731	0.9353	1	0.9952	0.9922	1	1	1	1	1	1	0.9859	0.9895	0.9709	0.9791	1	0.9865	1	1	0.98	1	1	0.9312	1	0.9765	0.9944	1	1	1	0.9537
AKIRIN1	1864	ES	3	2	4	0	1	0.0468	0.0088	1	0.9932	1	1	0.9832	0.9719	1	1	1	0.9898	1	1	0.9818	1	0.9883	0.9902	1	0.9888	0.995	0.9853	1	0.9648	0.9824	0.9877	0.9826	0.9876	0.9753	1	0.9887	1	0.9886	1	0.9925	0.9933	1	0.9893	0.9867	0.9727	1	0.9948
AKIRIN1	1866	ES	2	1	3	0	1	0.0311	0.0029	1	1	1	1	1	1	1	1	1	1	1	1	1	1	1	1	1	1	1	0.9897	1	1	1	1	1	1	1	1	1	1	1	1	1	1	1	1	1	1	1	1
NDUFS5	1869	AD	1.2	1.1	2	0	1	0.6133	0.1623	0.4896	0.5391	0.5176	0.5442	0.2634	0.5421	0.5934	0.0453	0.5376	0.3303	0.3657	0.523	0.5752	0.2791	0.5046	0.2056	0.2719	0.5249	0.5219	0.5037	0.2321	0.5619	0.2323	0.5298	0.5372	0.516	0.5476	0.5438	0.0269	0.3432	0.3246	0.5887	0.2247	0.5863	0.5321	0.5491	0.0391	0.4952	0.1973	0.1013
MACF1	1877	AT	109			0	1	0.226	0.0183	1	0.9988	0.9996	0.9971	0.9994	0.9993	1	0.9996	1	0.9984	1	0.9974	0.9995	0.9989	0.9978	0.9992	1	0.9996	0.9993	0.9991	1	0.9995	0.9993	1	0.9996	0.9987	0.9998	1	0.9982	0.9986	1	1	1	0.9987	0.9982	0.9985	0.9979	0.9994	0.9975	0.9985
MACF1	1879	AT	4			0	1	0.0393	0.0026	0	0.0012	0.0004	0.0012	0.0006	0.0007	0	0	0	0.0016	0	0.0006	0.0005	0.0007	0.0022	0	0	0.0004	0	0	0	0.0005	0.0007	0	0.0004	0.0013	0.0002	0	0.0009	0	0	0	0	0.0003	0.0018	0.0015	0.0021	0.0006	0.0025	0.001
MACF1	1880	AT	12.2			0	1	0.1981	0.0168	0	0	0	0.0017	0	0	0	0.0004	0	0	0	0.002	0	0.0003	0	0.0008	0	0	0.0007	0.0009	0	0	0	0	0	0	0	0	0.0009	0.0014	0	0	0	0.001	0	0	0	0	0	0.0005
MACF1	1881	ES	107	106	108	0	1	0.7636	0.1437	0.3906	0.4987	0.4309	0.7476	0.5835	0.5523	0.8563	0.6798	0.6192	0.651	0.7335	0.6534	0.7022	0.5377	0.8596	0.6894	0.8171	0.4835	0.753	0.6136	0.7545	0.6422	0.7095	0.6959	0.645	0.6483	0.6281	0.6578	0.664	0.7311	0.6775	0.4859	0.5574	0.5306	0.7071	0.7675	0.5764	0.1875	0.6973	0.601
MACF1	1882	ES	105	104	106	0	0.9983	0.1514	0.01	0	0	0.0038	0	0	0.0069	0	0	0	0.0025	0.0036	0.0046	0	0.0025	0.0015	0	0	0	0.0019	0	0	0	0	0.0066	0.0022	0.0028	0	0	0	0	0	0	0	0.0033	0	0	0	0	0	0
MACF1	1883	ES	103	102	104	0	1	0.7097	0.1041	0.6389	0.8218	0.623	0.7948	0.6441	0.6787	0.847	0.7817	0.6595	0.6932	0.7324	0.7346	0.807	0.78	0.8803	0.8468	0.8792	0.6922	0.7178	0.8031	0.8532	0.828	0.8136	0.7945	0.7787	0.7971	0.7817	0.7257	0.6308	0.7798	0.6992	0.4783	0.6667	0.8216	0.8944	0.8347	0.7367	0.3269	0.8016	0.7657
MACF1	1885	ES	77	76.1	79	0	0.9511	0.3288	0.0501	0.8981	0.9725	0.8808	1	1	1	1	1		0.9804	1	1	0.9695	0.9608	1	0.9683	1	0.9758	0.9847	0.9788	1	1	1	0.9828	0.9918	1	0.9315	1	1	1				0.9777	1	1	1	1		0.9833
MACF1	1886	ES	69	68	70	0	0.9913	0.0249	0.0027	1	1	1	1	1	1	1	1		1	1	1	1	1	0.9883	1	1	1	1	1	1	1	1	1	0.9929	1	1	1	1	1	1			1	1	1	1	1	1	1
MACF1	1887	ES	59	58	60	0	0.8831	0.6518	0.1388	0.593	0.8399	0.7402	0.9459	1	0.7776	1	1		0.8651	1	0.8595	0.7566	0.9402	0.9735	0.8973	0.9381	0.8535	0.9435	0.6998	0.8749		1	0.8158	0.9233	0.7239	0.8651		0.671	1				0.9776		0.921		0.7312		0.8963
MACF1	1888	ES	43.2:44:45:46:47	42	48	0	0.9372	1	0.2714	0.8338	0.0124	0.6424	0.164	0.2508	0.335	0.0358	0.1622		0.3903	0.1069	0.3629	0.6916	0.3114	0	0.3553	0.1052	0.5228	0.2618	0.1367	0.0399		0.1754	0.3361	0.24	0.1018	0.1122	1	0.2779	0.5904				0.1417		0.6154	0.1334	0.1386		0.1181
MACF1	1889	ES	29	28	30	0	0.8761	0.3717	0.0268	1	0.8885	1	1	1	0.8787	1	1		0.9445	1	1	1	0.9814	1	0.9775	1	1	1	1	1		1	1	1	1	1		1	1				1	1	1	1	1		1
PABPC4	1893	ES	11	10.2	12	0	1	0.3486	0.0426	0.8909	0.8986	0.9165	0.9277	0.9578	0.9251	0.8078	0.9059	0.882	0.9057	0.9446	0.9346	0.9464	0.9421	0.9368	0.962	0.9555	0.9463	0.9166	0.9293	0.9876	0.8469	0.966	0.9503	0.9289	0.8907	0.9381	0.9287	0.8948	0.8678	0.887	0.9383	0.895	0.8413	0.7859	0.8801	0.9108	0.9762	0.9495	0.9796
PABPC4	1894	ES	10.2:11	10.1	12	0	1	0.1563	0.0177	0.9793	0.9717	0.9603	0.986	0.992	1	0.9591	0.9819	0.9843	0.9873	0.9859	0.9874	0.9957	0.9934	0.9853	0.9881	0.9828	0.9875	0.98	0.9851	0.9944	0.9741	1	0.9942	0.9815	0.9966	0.9824	0.9808	0.9959	0.9911	0.982	1	0.976	0.9346	0.9372	0.9689	0.9669	0.9779	0.9563	0.9936
PABPC4	1895	ES	11	10.1	12	0	0.9965	0.2661	0.0426	0.9377	0.8965	0.9237	0.9669	0.9683	1	0.7383	0.9395	0.9727	0.9606	0.971	0.9567	0.9899	0.9837	0.9416	0.9788	0.9439	0.9657	0.9562	0.9712	0.9867	0.8324	1	0.9894	0.9328	0.9908	0.9571	0.9496	0.9912	0.9883	0.9496	1	0.9281	0.8418	0.8947	0.9244	0.9391	0.9386	0.8816	0.9798
PABPC4	1896	AD	10.2	10.1	12	0	0.9843	0.5974	0.0904	0.8768	0.8172	0.7236	0.8709	0.8595	1	0.8602	0.8712	0.9061	0.9035	0.8342	0.8639	0.9401	0.9158	0.8406	0.7973	0.7665	0.8435	0.8394	0.8565	0.7205	0.8942	1	0.9149	0.8277	0.9775	0.8094	0.8363	0.9728	0.9519	0.8944	1	0.8566	0.7609	0.8252	0.8357	0.7644	0.5598	0.5728	0.7953
PABPC4	1897	AD	10.2	10.1	11	0	1	0.4214	0.0488	0.7713	0.8086	0.6795	0.7209	0.8093	0.7222	0.8845	0.7907	0.656	0.7738	0.6936	0.7903	0.7144	0.72	0.8153	0.659	0.7851	0.7505	0.7055	0.6771	0.7136	0.8905	0.7494	0.6616	0.7974	0.7412	0.7255	0.7369	0.6969	0.5786	0.7565	0.7597	0.7712	0.7406	0.656	0.7319	0.6623	0.753	0.7584	0.7721
HEYL	1898	AP	1			0	0.8866	0.745	0.1503	0.692	0.8506	0.818	0.8506	0.4484	0.8733	1	1		0.8359	0.763	0.7957	1	0.7081	0.6607	0.7695		0.6663	0.6802					0.6223	0.7824	0.7892	1		1					0.8628	0.6223	0.7003	0.8359	1		0.9151
HEYL	1899	AP	2			0	0.8866	0.745	0.1503	0.308	0.1494	0.182	0.1494	0.5516	0.1267	0	0		0.1641	0.237	0.2043	0	0.2919	0.3393	0.2305		0.3337	0.3198					0.3777	0.2176	0.2108	0		0					0.1372	0.3777	0.2997	0.1641	0		0.0849
PPIE	1900	AT	9.2			0	1	0.115	0.008	0.018	0.0076	0.0063	0.0071	0.0253	0.0225	0.0066	0.0082	0.0067	0.0227	0.01	0.0117	0.02	0.0136	0.0102	0.006	0.0131	0.0082	0.0068	0.0099	0.0208	0.0159	0.0106	0.0165	0.0096	0.0147	0.0118	0.006	0.0142	0.0039	0.0057	0.0052	0.0019	0.007	0	0.0058	0.0047	0	0.0007	0.0109
PPIE	1901	AT	10			0	1	0.4618	0.0743	0.7694	0.8765	0.824	0.7846	0.8429	0.7226	0.7546	0.8618	0.7531	0.8836	0.8794	0.784	0.7836	0.7582	0.8801	0.8685	0.94	0.8642	0.8896	0.9018	0.8097	0.7743	0.7879	0.7337	0.8616	0.736	0.8352	0.6764	0.7986	0.76	0.9187	0.8602	0.8902	0.6649	0.8918	0.8504	0.9014	0.833	0.8446	0.8798
PPIE	1902	AT	12			0	1	0.4652	0.0725	0.2126	0.1159	0.1697	0.2083	0.1318	0.2549	0.2389	0.1299	0.2403	0.0938	0.1106	0.2043	0.1963	0.2282	0.1097	0.1255	0.0469	0.1276	0.1036	0.0883	0.1695	0.2098	0.2015	0.2497	0.1288	0.2493	0.153	0.3176	0.1872	0.2361	0.0756	0.1347	0.1079	0.3281	0.1082	0.1438	0.0939	0.167	0.1547	0.1093
PPIE	1903	ES	11	9.1	12	0	0.9895	0.7762	0.1259	0.6691	0.7031	0.6167	0.6928	0.3672	0.7803	0.716	0.3828	0.7775	0.6699	1	0.651	0.6898	0.5255	0.7319	0.5249		0.6636	0.7065	0.9096	0.5327	0.7319	0.8155	0.437	0.6928	0.6636	0.6284	0.7499	0.7314	0.5681	0.3839	0.4853	0.3182	0.5743	0.5703	0.4492	0.3845	0.3412	0.609	0.626
PPIE	1904	AD	7.2	7.1	8	0	1	0.95	0.1345	0.233	0.1931	0.1474	0.0498	0.0969	0.179	0.0877	0.0749	0.1088	0.0596	0.1181	0.0843	0.101	0.062	0.1163	0.0409	0.048	0.3314	0.0573	0.1869	0.0417	0.3027	0.0484	0.3149	0.2147	0.2033	0.0368	0.0785	0.0368	0.3523	0.0882	0.1208	0.0186	0.0497	0.0371	0.0279	0.0213	0.0269	0.0641	0.0852
PPIE	1905	ES	7.1:7.2	6	8	0	1	0.8318	0.1682	0.8194	1	0.8396	0.6454	1	1	1	1	1	0.7602	1	0.7003	1	1	0.9559	0.7625	0.5583	0.9561	0.8117	1	0.8246	1	0.8047	0.9533	0.9392	0.9075	0.8037	0.697	0.5012	0.9167	0.9002	1	0.4339	0.8969	0.729	0.4546	0.4965	1	0.862	0.8771
PPIE	1906	ES	7.1	6	8	0	1	0.0715	0.0081	0.9723	1	0.9872	0.9877	1	1	1	1	1	0.9893	1	0.9835	1	1	0.9976	0.9953	0.9846	0.9904	0.994	1	0.9945	1	0.9931	0.9904	0.9923	0.9853	0.9951	0.983	0.9827	0.9735	0.994	1	0.988	0.9972	0.9923	0.9835	0.9888	1	0.9949	0.9935
PPIE	1907	AD	4.2	4.1	5	0	1	0.2317	0.024	0.0187	0.0388	0.0064	0.0371	0.0105	0.0533	0.0964	0.0124	0.0159	0.0288	0.04	0.0154	0.0659	0.0524	0.0119	0.0238	0.0331	0.0121	0.0227	0.0347	0.0252	0.0851	0.0229	0.0197	0.0193	0.0311	0.0165	0.025	0.0177	0.0127	0.0205	0.0173	0.0241	0.0061	0.0107	0.0108	0.02	0.0052	0.0155	0.0564
PPIE	1909	ES	00:04:01.100000	2	6	0	1	0.0166	0.002	1	1	1	1	1	1	1	0.9936	1	1	1	0.9977	1	1	1	1	1	1	1	1	1	1	1	1	0.9946	1	1	1	1	1	1	1	1	1	1	1	1	1	1	1
PPIE	1910	AD	1.2	1.1	2	0	0.9948	0.7309	0.0616	0.8209	0.7957	0.7557	0.8601	0.8497	0.8696	0.8514	0.8686	0.7759	0.7778	0.8063	0.7954	0.8761	0.8584	0.8571	0.8652	0.7707	0.8813	0.8766	0.8589	0.8373	0.8405	0.8938	0.7836	0.777	0.8311	0.837	0.9649	0.7876	0.7516	0.8549	0.8584	0.8697	0.877	0.788	0.8624	0.8652	0.8711	0.8479	0.8318
BMP8B	1911	AT	6.2			0	1	0.8458	0.1374	0.2063	0.0695	0.2261	0.213	0.1176	0.3502	0.1023	0.2148	0.7817	0.155	0.1147	0.1257	0.1996	0.1613	0.0882	0.1325	0.1148	0	0.1557	0.2159	0.1346	0.3221	0.3687	0.2101	0.2025	0.4282	0.3444	0.6503	0.5203	0.3413	0.3741	0.2624	0.4178	0.133	0.1096	0.3233	0.0626	0.2882	0.1487	0.1409
BMP8B	1912	AT	8			0	1	0.8458	0.1374	0.7937	0.9305	0.7739	0.787	0.8824	0.6498	0.8977	0.7852	0.2183	0.845	0.8853	0.8743	0.8004	0.8387	0.9118	0.8675	0.8852	1	0.8443	0.7841	0.8654	0.6779	0.6313	0.7899	0.7975	0.5718	0.6556	0.3497	0.4797	0.6587	0.6259	0.7376	0.5822	0.867	0.8904	0.6767	0.9374	0.7118	0.8513	0.8591
TRIT1	1913	AT	12			0	1	0.2537	0.0263	0.9731	0.9711	0.9745	0.9715	0.9887	0.9823	0.9886	0.9761	1	0.9892	0.9038	0.9708	0.9602	0.9865	0.9902	0.9893	1	0.9905	0.9857	0.9806	0.9701	1	0.9625	0.9744	0.9683	0.9884	0.9769	0.9966	0.9612	0.9703	0.9935	0.9966	0.9853	0.996	0.988	1	0.985	0.9953	0.9873	0.9642
TRIT1	1914	AT	5			0	1	0.2537	0.0263	0.0269	0.0289	0.0255	0.0285	0.0113	0.0177	0.0114	0.0239	0	0.0108	0.0962	0.0292	0.0398	0.0135	0.0098	0.0107	0	0.0095	0.0143	0.0194	0.0299	0	0.0375	0.0256	0.0317	0.0116	0.0231	0.0034	0.0388	0.0297	0.0065	0.0034	0.0147	0.004	0.012	0	0.015	0.0047	0.0127	0.0358
TRIT1	1916	ES	10	9	11	0	1	0.0423	0.0027	1	1	1	1	1	1	1	1	1	1	1	1	1	1	1	1	1	1	1	1	1	1	1	1	1	1	1	1	1	1	1	1	1	1	1	1	1	1	1	1
TRIT1	1918	ES	9	8	10	0	1	0.0729	0.0087	1	1	0.9656	1	1	1	1	1	1	1	1	1	1	1	0.9909	0.9855	1	1	1	1	1	1	1	1	1	1	1	1	1	1	1	1	0.989	1	1	1	1	1	0.9833	0.9945
TRIT1	1920	ES	8	7.2	9	0	1	0.1321	0.0168	1	1	1	0.9618	0.9697	0.9732	1	1	1	1	1	1	1	1	0.9761	0.983	1	1	0.9922	1	1	1	1	1	1	1	1	1	1	0.9608	1	0.9735	1	1	1	1	1	1	1	0.9894
TRIT1	1921	AA	7.1	6.2	7.2	0	0.9668	0.2155	0.026	1	0.9446	0.9668	0.923	0.9213	1	1	0.9389	1	1	1	0.9912	0.9699	1	0.9849	1	1	1	0.9711	1	1	0.8563	1	1	1	1	1	1	1	1	1	1	1	0.9852	1	0.9781	1	1	1	0.9968
TRIT1	1922	AD	6.2	6.1	7.1	0	0.9476	0.5111	0.0935		0.6745	0.8339	0.8067	1	0.8442	1	0.7156	0.8403	0.8762	0.7928	0.7911	0.9326	0.8844	0.87	0.9583	1	0.8326	0.9185	0.7321	0.817	0.6906	0.9132	0.8056		0.7152	0.874	0.9387	0.7928	0.9305	0.8959	0.9306	0.7015	0.8941	0.8516	1	0.8818	0.8196	0.6966	0.8614
TRIT1	1923	ES	4	3.1	6.1	0	0.9983	0.3383	0.0558	0.8081	0.9752	0.9771	0.93	1	0.8883	1	0.8843	1	0.9467	0.9346	0.8671	0.9103	0.9812	0.9527	0.8174	0.916	0.9462	0.9661	0.9244	0.7635	1	0.8384	0.9649	0.9015	0.9465	0.9381	0.8647	0.9682	0.8186	0.7317	0.889	0.8207	0.9805	0.9254	0.8936	0.8899	0.9722	0.9118	0.9307
TRIT1	1924	ES	2:3.1:4:6.1:6.2	1	7.1	0	1	0.23	0.032	0.9453	0.9646	1	1	1	0.9426	1	1	1	0.9816	1	0.975	1	1	0.9864	1	1	0.9733	0.9605	1	0.9357	0.9039	1	0.9554	1	1	0.9747	1	0.9606	1	0.9199	0.8314	0.9585	0.9594	1	0.9227	1	0.9408	1	0.9849
TRIT1	1926	ES	2:3.1:6.1:6.2	1	7.1	0	0.8272	0.6273	0.1562	0.8666			1		0.777		1		0.848	1	0.9037	1	1	0.8518	1	1	0.7757	0.5697	1	0.8668		1	0.5714	1	1	0.7958	1	0.6777	1	0.8737	0.5621	0.8971	0.4863	1	0.6877	1	0.4263	1	0.8989
TRIT1	1928	ES	2:3.1:4:6.1	1	7.1	0	0.9023	0.6723	0.1378	0.7436	0.9314	1	1		0.8121		1	1	0.9035	1	0.9217	1	1	0.9239	1		0.8957	0.7295	1	0.7898	0.8022	1	0.8531		1	0.864		0.8999	1	0.5892		0.9255	0.747	1		1	0.7798	1	0.921
TRIT1	1932	ES	2:3.1:4:6.1:6.2:7.1:7.2:8:9	1	10	0	1	0.1567	0.0164	1	1	1	1	1	1	1	1	1	0.9842	1	0.9861	0.9605	1	0.9872	1	1	1	1	1	1	1	1	1	1	1	1	1	1	0.9445	0.9433	1	0.9665	0.9907	0.9528	1	1	1	1	0.9872
TRIT1	1934	ES	2:3.1:6.1:6.2:7.1:7.2:8:9	1	10	0	0.8796	0.4821	0.077	1	1	1	1		1		1		0.8713	1	0.9465	0.8311	1	0.8622	1	1	1	1	1	1		1	1	1	1	1	1	1	0.8653	0.9155	1	0.9197	0.8135	0.7162	1	1	1	1	0.9163
TRIT1	1936	ES	2:3.1:4:6.1:7.1:7.2:8:9	1	10	0	0.9075	0.5271	0.0832	1	1	1	1		1		1	1	0.9166	1	0.9552	0.6592	1	0.9282	1		1	1	1	1	1	1	1		1	1	1	1	0.5671	0.6755	1	0.9395	0.93	0.8111		1	1	1	0.9323
TRIT1	1971	ES	00:02:03.100000	1	4	0	0.9913	0.1861	0.0233	1	0.9739	0.976	1	1	0.9394	0.9555	1	1	0.9797	1	0.9911	1	1	0.9846	1	1	0.9775	1	1	1	1	1	1	1	1	1	1	1	1	1	1	1	0.9884	1	1	1	1	1	0.9918
TRIT1	1972	ES	00:03:01.100000	1	6.1	0	1	0.2688	0.0356	1	0.9763	1	0.9719	1	1	1	1	1	1	1	0.9784	0.9445	1	1	0.9759	1	0.9563	1	1	0.9404	1	1	0.9604	1	0.9723	0.9326	1	1	1	1	0.8301	0.8646	0.9902	0.9489	0.977	0.9548	0.9271	1	0.9768
TRIT1	1974	ES	00:02:03.100000	1	6.1	0	0.7539	0.7789	0.1651	1			0.836		1		1		1	1	0.9132	0.7541		1	0.926		0.6737	1	1	0.871		1		1	0.8072	0.5779	1	1	1	1	0.5417	0.6976	0.7991	0.6842	0.8821	0.8034	0.3718	1	0.8477
MYCL	1975	AT	2			0	1	0.5361	0.0781	0.8987	0.6227	0.9166	0.8761	0.8856	0.8985	0.9434	0.6726	0.7398	0.879	0.8549	0.8799	0.8763	0.9492	0.8809	0.8201	0.8634	0.8923	0.9225	0.5951	0.862	0.7903	0.754	0.9239	0.966	0.8443	0.9052	0.7196	0.6907	0.9124	0.9166	0.692	0.8968	0.9883	0.9381	0.9431	0.7018	0.9184	0.8834	0.881
MYCL	1976	AT	1.4			0	1	0.5361	0.0781	0.1013	0.3773	0.0834	0.1239	0.1144	0.1015	0.0566	0.3274	0.2602	0.121	0.1451	0.1201	0.1237	0.0508	0.1191	0.1799	0.1366	0.1077	0.0775	0.4049	0.138	0.2097	0.246	0.0761	0.034	0.1557	0.0948	0.2804	0.3093	0.0876	0.0834	0.308	0.1032	0.0117	0.0619	0.0569	0.2982	0.0816	0.1166	0.119
MFSD2A	1978	AA	3.1	2	3.2	0	0.9162	0.8618	0.0583	0.0109	0.0392	0	0.0529	0	0	0.0075		0.4093		0.0901	0	0.1334	0.1176	0.0424	0.0155	0	0	0	0		0	0.0829	0.0265	0.0281	0.0062	0.0239	0.0546	0	0	0.0233		0	0.0986	0	0	0.0148	0		0.0156
MFSD2A	1980	ES	00:02:03.200000	1	4	0	0.9948	0.1304	0.0087	1	1	1	1	1	1	1	1	1	1	1	1	1	1	1	1	1	1	1	1	1	1	1	1	1	0.9956	1	1	1	1	1	1	1	1	0.9964	0.9925	1	1	1	1
CAP1	1981	AA	3.1	2.2	3.2	0	1	0.1957	0.022	0.9219	0.9105	0.9063	0.9631	0.9184	0.9593	0.9434	0.8535	1	0.8848	0.8934	0.8963	0.9323	0.9176	0.93	0.9122	0.9018	0.9191	0.8873	0.9188	0.8999	0.9442	0.9636	0.8942	0.9227	0.8973	0.8786	0.9393	0.8739	0.952	0.8417	0.9129	0.9427	0.907	0.9257	0.9234	0.929	0.9224	0.8819	0.9018
CAP1	1982	AA	2.1	1.2	2.2	0	0.9983	0.4622	0.0427	0.2505	0.2197	0.2314	0.2801	0.2661	0.3288	0.0851	0.2307	0.381	0.3019	0.1903	0.2657	0.2412	0.2642	0.2992	0.2421	0.288	0.2497	0.2592	0.2403	0.3077	0.3792	0.3876	0.283	0.2543	0.3028	0.2478	0.4037	0.2378	0.2699	0.293	0.2584	0.2563	0.2637	0.2375	0.2521	0.2438	0.2643	0.2256	0.2327
CAP1	1983	AD	1.2	1.1	2.1	0	0.993	0.7437	0.0704	0.72	0.6488	0.6683	0.6963	0.7495	0.6846	0.2563	0.7169	0.8532	0.7495	0.6816	0.8154	0.5966	0.6709	0.8018	0.6966	0.6762	0.7418	0.7156	0.6661	0.7499	0.595	0.6969	0.8007	0.7524	0.7628	0.6852	1	0.6442	0.8589	0.791	0.665	0.6921	0.7194	0.6467	0.784	0.6449	0.6341	0.6481	0.6617
CAP1	1984	ES	1.2:2.1	1.1	2.2	0	0.9948	0.8181	0.0737	0.5449	0.5145	0.4813	0.571	0.4255	0.5938	0.1478	0.5019		0.5967	0.4365	0.5122	0.3562	0.5021	0.668	0.47	0.5612	0.5033	0.517	0.4977	0.4741	0.6667	0.5633	0.4488	0.5244	0.6175	0.5013	0.678	0.4912	0.4581	0.3726	0.4619	0.5721	0.3993	0.4645	0.5007	0.4689	0.3992	0.4432	0.4634
CAP1	1985	AA	2.1	1.1	2.2	0	0.9825	0.4908	0.0629	0.3165	0.3632	0.3142	0.366	0.1975	0.401	0.3334	0.2835		0.3296	0.2646	0.1912	0.2711	0.3298	0.331	0.2775	0.3784	0.2596	0.2973	0.3306	0.2301	0.5752	0.3581	0.1677	0.2652	0.3329	0.3148		0.3465	0.1214	0.1349	0.3008	0.3716	0.205	0.3202	0.2155	0.3259	0.276	0.3006	0.3051
CAP1	1986	AD	1.2	1.1	2.2	0	0.9983	0.5121	0.0494	0.7808	0.7891	0.754	0.7728	0.6701	0.7479	0.6496	0.7696	1	0.7729	0.7662	0.7427	0.6337	0.7364	0.8242	0.7341	0.7586	0.7517	0.7526	0.757	0.6685	0.7651	0.6696	0.6723	0.7628	0.7871	0.7521	0.7557	0.7548	0.6945	0.5876	0.7102	0.7941	0.6486	0.7347	0.7474	0.7315	0.6478	0.731	0.739
PPT1	1987	AP	1			0	0.9983	0.5584	0.0452	1	1	1	1	1	1	1	1	1	0.9812	1	0.993	0.9688	0.9965	1	1	1	1	1	1	1	1	1	1	1	0.9725	1	0.9485	0.9773	1	1	1	1	1	1	1	1	1	1	1
PPT1	1988	AP	6			0	0.9983	0.5584	0.0452	0	0	0	0	0	0	0	0	0	0.0188	0	0.007	0.0312	0.0035	0	0	0	0	0	0	0	0	0	0	0	0.0275	0	0.0515	0.0227	0	0	0	0	0	0	0	0	0	0	0
PPT1	1991	RI	10.2	10.1	10.3	0	1	0.0085	0.001	1	0.9974	1	1	1	1	1	1	1	0.9978	0.9961	1	1	0.9989	1	1	1	1	1	1	1	1	1	1	1	1	1	1	1	1	1	1	1	1	1	1	1	1	1	1
PPT1	1992	ES	9	8	10.1	1	0.7749	0.0643	0.0093	0.9626	0.9761	0.9606	0.9642	0.9661			0.9609	0.9443	0.9503		0.9734		0.9809	0.9816	0.965		0.9807		0.9695	0.9757		0.9363		0.9642		0.9719			0.9756		0.9711	0.9643	0.9659	0.9738	0.9733		0.9623		0.9722
PPT1	1993	AA	5.1	4	5.2	0	1	0.0737	0.0049	0	0	0.0031	0.0024	0	0.0045	0	0	0	0.0024	0.0154	0	0.0042	0.0034	0	0	0	0	0.0013	0	0	0	0	0	0.0008	0	0	0	0	0	0	0	0.0086	0	0	0	0	0	0	0.0059
PPT1	1995	ES	02:03:04	1	5.2	0	1	0.0374	0.0019	1	1	1	1	1	1	1	1	1	1	1	1	1	1	1	1	1	1	1	1	1	1	1	1	1	1	1	1	1	1	1	1	1	1	1	1	1	1	1	1
SMAP2	1996	AP	3			0	0.9983	0.671	0.064	0.0151	0	0	0	0	0	0	0	0	0	0	0.0127	0.0509	0.0114	0	0	0	0	0	0	0	0	0	0	0.0101	0	0	0	0	0	0	0	0	0	0	0	0	0	0	0.0499
SMAP2	1997	AP	1			0	0.9983	0.7696	0.082	0.9849	1	0.923	0.975	0.8929	0.8995	1	0.9129	1	0.9547	1	0.939	0.9329	0.8803	0.8867	0.9586	0.9075	0.9252	0.9468	0.9734	0.7483	0.9583	1	0.9668	0.9705	0.971	0.8787	1	1	0.8357	0.8943	0.8557	0.8334	0.9709	0.9412	0.9876	0.9737	0.9505	0.9156	0.9501
SMAP2	1998	AP	2			0	0.9983	0.2846	0.0414	0	0	0.077	0.025	0.1071	0.1005	0	0.0871	0	0.0453	0	0.0483	0.0162	0.1083	0.1133	0.0414	0.0925	0.0748	0.0532	0.0266	0.2517	0.0417	0	0.0332	0.0193	0.029	0.1213	0	0	0.1643	0.1057	0.1443	0.1666	0.0291	0.0588	0.0124	0.0263	0.0495	0.0844	0
ZFP69	2001	AA	2.1	1	2.2	0	0.9686	0.544	0.0929	1	1	1	0.9132	1	0.8045	1	0.7619		1	1	1	1	1	0.8241	1	1	1	1	1	1	0.5783	1	0.9287	1	0.8903	1	0.4976	0.7853	1	0.8205		0.8746	0.8045	0.7799	0.8015	0.8903	1	0.856	1
EXO5	2003	RI	1.2	1.1	1.3	0	0.9284	0.7897	0.1786	1	1	0.7885	0.8467	0.4639	1	0.2966	1		0.8935	1	1	1	0.8212	0.9437	0.7455	1	0.8513	0.7855	0.8542	0.835	1	0.6508	1	1	0.8904	0.7943	1	1	1	1	1	0.6847	0.4702	0.7455	0.7759	0.8146	0.5158	0.7455	1
EXO5	2006	AD	1.2:1.3	1.1	1.5	0	0.9529	0.6364	0.1078	1	1	0.7459	0.9394	1	1	1	1	1	1	1	1	1	0.8937	1	0.8091	1	1	1	1	1	1	1		1	0.6749	1			1		0.6073		1	0.8033	0.7099	1	1	1	1
ZNF684	2008	AT	5.2			0	1	0.7471	0.1078	0.3656	0.3998	0.3747	0.4674	0.3116	0.397	0.5334	0.501	0.4627	0.4731	0.6819	0.3125	0.5042	0.4216	0.2825	0.4108	0.1648	0.4472	0.3412	0.3066	0.2146	0.3135	0.2329	0.5085	0.4238	0.437	0.4553	0.4916	0.3942	0.2896	0.2367	0.3214	0.1703	0.2898	0.3021	0.2612	0.1825	0.3517	0.2557	0.3764
ZNF684	2009	AT	6			0	1	0.7471	0.1078	0.6344	0.6002	0.6253	0.5326	0.6884	0.603	0.4666	0.499	0.5373	0.5269	0.3181	0.6875	0.4958	0.5784	0.7175	0.5892	0.8352	0.5528	0.6588	0.6934	0.7854	0.6865	0.7671	0.4915	0.5762	0.563	0.5447	0.5084	0.6058	0.7104	0.7633	0.6786	0.8297	0.7102	0.6979	0.7388	0.8175	0.6483	0.7443	0.6236
NFYC	2012	AP	10			0	1	0.5291	0.0495	0.0323	0.008	0.0089	0.0154	0.0103	0.0202	0.0129	0.0252	0.0075	0.0189	0.0082	0.028	0.1071	0.0207	0.0086	0	0.0091	0.016	0.0057	0.0176	0.006	0.075	0.0478	0.027	0.0278	0.0423	0.0379	0.1411	0.0117	0.0722	0.0327	0.0349	0.0068	0.0081	0.0049	0.0162	0.0118	0	0.0133	0.0366
NFYC	2013	AP	1			0	1	0.9128	0.1048	0.8857	0.944	0.8759	0.9301	0.9664	0.9426	0.9737	0.9398	0.9255	0.9547	0.962	0.8531	0.7652	0.8353	0.9618	0.7499	0.8309	0.9456	0.9833	0.9307	0.9803	0.8067	0.7634	0.9445	0.8972	0.877	0.8759	0.8098	0.9533	0.8707	0.9501	0.8735	0.9293	0.9336	0.9257	0.8915	0.8751	0.9951	0.856	0.9136
NFYC	2014	AP	2			0	1	0.0401	0.0072	0.0056	0.029	0.0093	0	0.0071	0	0.0134	0.0174	0.0312	0.0065	0.0169	0.0083	0.0377	0.0067	0.0102	0.0032	0.0094	0.0095	0.0033	0.0073	0.0042	0	0	0	0.0177	0.0055	0.0065	0.0195	0.0121	0	0	0	0	0	0	0	0.0049	0.0049	0.0219	0.0063
NFYC	2015	AP	4			0	1	0.5092	0.0698	0.0764	0.019	0.1059	0.0546	0.0162	0.0372	0	0.0177	0.0357	0.0199	0.0129	0.1106	0.09	0.1373	0.0194	0.2469	0.1506	0.0289	0.0077	0.0444	0.0095	0.1184	0.1888	0.0285	0.0574	0.0752	0.0797	0.0297	0.023	0.057	0.0172	0.0916	0.064	0.0583	0.0694	0.0923	0.1082	0	0.1088	0.0434
NFYC	2017	AA	20.1:20.2	19	20.3	0	0.9965	0.5583	0.0547	0.9145	0.9641	0.9402	0.9622	0.8115	0.9652	0.7305	0.9611	0.9508	0.8871	0.8543	0.9256	0.9711	0.9189	0.9312	0.883	0.9449	0.9406	0.9634	0.9012	0.9652	0.9417	0.909	0.9786	0.9432	0.943	0.9781	1	0.9129	0.8737	0.7894	1	0.8475	0.8995	0.9607	0.9464	0.9272	0.9302	0.9704	0.9489
NFYC	2018	AA	20.2	19	20.3	0	0.9948	0.2054	0.0284	0.942	0.9884	0.9581	0.9587	0.864	0.9631	0.8945	0.9742	0.9672	0.9434	0.9207	0.9579	0.9762	0.9531	0.9359	0.9377	0.9457	0.9508	0.9667	0.9449	0.9667	0.9638	0.9122	0.9833	0.9607	0.9536	0.9846	1	0.9555	0.7946	0.9048	1	0.9541	0.9565	0.9765	0.969	0.9581	0.9732	0.9856	0.9541
NFYC	2019	AA	20.1	19	20.2	0	1	0.5249	0.0764	0.3909	0.2352	0.4009	0.5168	0.3976	0.5086	0.2375	0.3893	0.3896	0.3147	0.3299	0.3479	0.4436	0.352	0.4746	0.3282	0.4897	0.4437	0.4689	0.341	0.4822	0.3719	0.4835	0.4298	0.3984	0.4395	0.4059	0.2916	0.3223	0.6353	0.2775	0.4144	0.2066	0.2842	0.3643	0.3548	0.3516	0.2636	0.3173	0.4652
NFYC	2020	ES	18	17	19	0	1	0.3128	0.0426	0.0712	0.1639	0.1082	0.1452	0.1334	0.0623	0.0481	0.0542	0.0441	0.1156	0.0909	0.1204	0.1478	0.1817	0.1323	0.0776	0.1409	0.0892	0.2184	0.0774	0.1683	0.171	0.107	0.0625	0.1281	0.1273	0.1168	0.2064	0.0617	0.3128	0.1082	0.2122	0.1441	0.0276	0.1067	0.0806	0.0858	0.0777	0.0847	0.1583
NFYC	2021	AA	16.1	15	16.2	0	1	0.0458	0.0059	1	0.9925	0.9932	1	0.9904	0.994	1	0.9937	1	0.9907	1	1	0.9937	1	1	0.9953	0.9868	1	1	1	1	1	1	1	1	1	0.9909	1	0.9938	1	0.978	1	0.988	0.997	1	0.9893	0.9807	0.9937	0.988	0.9914
NFYC	2022	ES	13	12	14	0	1	0.0257	0.0031	1	0.9909	1	1	0.9884	1	1	1	1	1	1	1	1	1	1	1	1	1	0.9972	1	1	1	1	1	1	1	1	1	1	1	1	1	1	0.9968	1	1	1	1	0.9894	1
NFYC	2023	ES	6	1	11	0	0.993	0.5967	0.0519	0	0.0184	0.1035	0.0486	0.0311	0.0399	0.0203	0.047	0.1648	0.0496	0	0.2431	0.1162	0.077	0.0345	0	0.0231	0.096	0.0587	0.0534	0	0.1013	0.0617	0.104	0.0876	0.0687	0.0392	0.2567	0.0534	0.0362	0.1025	0.1463	0.1011	0.0322	0.0251	0	0.0192	0.0447	0.0045	0
CTPS1	2025	AP	2			0	0.986	0.6379	0.0436	0	0	0	0	0	0	0	0		0	0	0	0	0	0	0	0	0	0	0	0	0	0	0	0	0	0	0	0	0	0	0	0	0	0	0	0	0	0	0
CTPS1	2026	AP	1			0	0.986	0.6379	0.0759	1	0.9561	1	1	1	1	1	0.9053		0.971	0.9426	0.948	1	1	1	1	1	0.9722	1	0.9454	0.9426	1	1	1	0.8625	1	1	1	0.9463	1	1	0.8361	1	1	1	0.9454	1	0.9629	1	0.9372
CTPS1	2027	AP	3.1			0	0.986	0.5199	0.0643	0	0.0438	0	0	0	0	0	0.0947		0.029	0.0574	0.052	0	0	0	0	0	0.0278	0	0.0546	0.0574	0	0	0	0.1375	0	0	0	0.0537	0	0	0.1639	0	0	0	0.0546	0	0.0371	0	0.0628
CTPS1	2028	AT	9.2			0	1	0.2864	0.021	0.0112	0.012	0.0159	0.0197	0.0041	0.0518	0.0145	0.0064	0	0.0299	0.017	0.0388	0.0162	0.0187	0.0014	0.0116	0.0231	0.0024	0.0364	0.0118	0.0039	0.0101	0.0139	0.0199	0.0099	0.0245	0.009	0	0.0134	0.0207	0.0181	0.0209	0.0157	0.0032	0	0.002	0.0206	0	0	0.0595
CTPS1	2029	AT	20			0	1	0.2864	0.021	0.9888	0.988	0.9841	0.9803	0.9959	0.9482	0.9855	0.9936	1	0.9701	0.983	0.9612	0.9838	0.9813	0.9986	0.9884	0.9769	0.9976	0.9636	0.9882	0.9961	0.9899	0.9861	0.9801	0.9901	0.9755	0.991	1	0.9866	0.9793	0.9819	0.9791	0.9843	0.9968	1	0.998	0.9794	1	1	0.9405
CTPS1	2030	ES	3.2:4:5:6	1	7	0	0.9983	0.0293	0.0018	1	1	1	1	1	1	1	1	1	1	1	1	1	1	1	1	1	1	1	1	1	1	1	1	1	1	1	1	1	1	1	1	1	1	1	1	1	1	1	1
SCMH1	2041	AP	1			0	0.9232	1	0.1663	0.9696	0.7909	0.8615	0.961	0.714	0.6791	0.4217			0.8185	0.3009	0.6985	0.8771	0.9125	0.806	0.9099	0.9839	0.7057	0.6819	0.8466	0.7139		0.8134	0.6393	0.6163	0.8125	0.781		0.6633	0.6021			0.1328	0.8467	0.8473	0.7574	0.8708	0.9749		0.9283
SCMH1	2042	AP	4.1			0	0.9232	0.4452	0.0572	0	0	0.035	0.039	0	0.0573	0.0463			0	0.1414	0.0741	0	0.0294	0.0196	0.0454	0	0.0595	0.0467	0.058	0.1236		0	0.1558	0	0.081	0		0.1455	0			0	0.0489	0	0	0	0		0
SCMH1	2046	AP	3			0	0.9232	1	0.1402	0.0304	0.2091	0.1035	0	0.286	0.2636	0.532			0.1815	0.5577	0.2274	0.1229	0.058	0.1743	0.0447	0.0161	0.2348	0.2714	0.0954	0.1625		0.1866	0.2048	0.3837	0.1065	0.219		0.1912	0.3979			0.8672	0.1044	0.1527	0.2426	0.1292	0.0251		0.0717
SCMH1	2047	ES	17	16	18	0	0.9965	0.7538	0.0969	0.605	0.7529	0.7656	0.7025	0.7742	0.7493	0.8158	0.7183	0.7308	0.856	0.8344	0.6593	0.7673	0.6978	0.7624	0.6212	0.7529	0.6667	0.7006	0.7688	0.7712	0.8786	0.8353	0.709	0.8772	0.6921	0.6255	0.7342	0.6465	1	0.5149	0.8123	0.6579	0.6013	0.6744	0.6746	0.7143	0.5263	0.7941	0.72
SCMH1	2048	ES	10:11:00	9	12	0	1	0.1903	0.0149	0.9792	1	0.9856	1	1	1	1	1	1	0.9764	0.9724	1	1	0.9825	0.9754	1	1	1	1	1	1	1	1	1	0.9797	1	1	1	1	1	1	0.8097	1	0.9812	1	0.9891	0.9615	1	0.9334	1
SCMH1	2049	ES	07:08:00	6	9	0	0.9878	0.4492	0.0849	1	0.8054	0.8439	0.949	0.803	1	0.8659	0.9047		0.8122	0.9429	0.9423	0.8217	0.8723	0.8415	1	1	1	0.9159	0.9556	0.8436		0.9597	0.9304	0.9574	0.8577	1	1	1	1	0.8749		1	0.8513	1	0.9787	0.7696	0.7065	0.6826	0.779
SCMH1	2051	ES	7	6	8	0	0.9721	0.6795	0.109	0.9354	1	0.8748	0.8037	0.8	0.6441	0.8346	0.8889		0.8786	0.8184	0.6659	0.8976	0.7464	0.8476	0.9129	0.5532	0.7742	0.8751	0.8685	0.7461		1	0.8142	0.9083	0.8757	0.6557		1	0.9398	1		0.6799	0.7294	0.7364	0.9235	0.7619	0.7042		0.9384
SCMH1	2053	ES	06:07:08	5	9	0	0.9878	0.6652	0.1289	0.7676	0.7528	0.808	0.7814	0.8596	0.7635	1	0.7886		0.9367	0.8999	0.6846	0.8175	0.9235	0.7418	0.8496	1	0.8016	0.7769	0.9017	0.8942		0.8359	0.8502	0.9131	0.8474	0.5691	0.6179	1	0.9366	1		0.4487	0.7213	1	0.9325	0.7919	0.7002		0.8471
SCMH1	2054	ES	06:08:00	5	9	0	0.8639	1	0.2026	0.3615		0.5371	0.5482	0.8647	0.754	1	0.5514		0.8214	0.7666	0.7566	0.5614	0.874	0.4253	0.4532	1	0.7306	0.5915	0.6359	0.8784	0.4129		0.922	0.7119	0.6239	0.669	0.5686				0.6376	0.3967	0.6712	1	0.6934	0.6912	0.6369	1	0.3804
SCMH1	2055	ES	8	5	9	0	0.7679	0.8903	0.1729	0.7286	0.461	0.6849	0.7356		0.5476					0.7663	0.4675	0.6653	0.8153	0.5153	0.6405	1		0.7366		0.794		0.77		0.8019		0.6004						0.2688	0.3974	1	0.6986	0.7154	0.5192		0.6224
SCMH1	2057	ES	06:07:00	5	8	0	0.986	0.8	0.1465	0.5785	0.8047	0.7166	0.5821	0.6078	0.7509	1	0.8701		0.8703	0.7722	0.7328	0.7504	0.763	0.7465	0.7993	0.4039	0.8475	0.6149	0.8954	0.6758		0.6412	0.697	0.7386	0.8811	0.507	0.6053	0.7959	1	1		0.6706	0.8058	0.4406	0.8789	0.6535	0.7307	0.25	0.7929
SCMH1	2058	ES	6	5	8	0	0.8586	1	0.1987	0.1863		0.3971	0.3165	0.6197	0.7364	1	0.6824		0.6689	0.5424	0.7929	0.4475	0.6407	0.4255	0.3585	0.4363	0.7835	0.3872	0.6146	0.6406		0	0.8163	0.3946	0.6803	0.6038	0.5525					0.6234	0.7626	0.3165	0.5322	0.5141	0.6604	0.4841	0.2921
FOXJ3	2063	AP	5.1			0	1	0	0	0	0	0	0	0	0	0	0	0	0	0	0	0	0	0	0	0	0	0	0	0	0	0	0	0	0	0	0	0	0	0	0	0	0	0	0	0	0	0	0
FOXJ3	2064	AP	2			0	1	0.8667	0.1804	0.2638	0.5401	0.3271	0.3237	0.4622	0.3975	0.5804	0.3767	0	0.5209	0.2267	0.3121	0.3765	0.3361	0.4563	0.5706	0.2706	0.3969	0.7139	0.4601	0.3252	0.3769	0.3242	0.4341	0.6673	0.2824	0.4032	0.6377	0.3176	0.6776	0	0.1312	0.1018	0.6122	0.2835	0.2596	0.1477	0.7822	0.0705	0.2618
FOXJ3	2065	AP	14.1			0	1	0.971	0.1465	0.1921	0.0621	0.1429	0.3056	0.1975	0.2316	0.1281	0.2392	0	0.3512	0.322	0.448	0.3264	0.3264	0.2216	0.2193	0.1314	0.2783	0.1498	0.0941	0.4619	0.1373	0.372	0.2248	0.2016	0.3629	0.2061	0.2683	0.4485	0.1385	0.107	0.1916	0.2601	0.1662	0.2294	0.2625	0.1514	0.0345	0.0086	0.6354
FOXJ3	2066	AP	3			0	1	0.269	0.0124	0	0	0	0	0	0	0	0	0	0	0	0	0	0	0	0	0	0	0	0	0	0	0	0	0	0	0	0	0	0	0	0	0	0	0	0	0	0	0	0
FOXJ3	2067	AP	1			0	1	1	0.1793	0.544	0.3978	0.53	0.3708	0.3404	0.3709	0.2915	0.3841	1	0.1279	0.4513	0.2399	0.2971	0.3375	0.3221	0.2101	0.598	0.3248	0.1363	0.4459	0.2129	0.4858	0.3038	0.341	0.1311	0.3547	0.3907	0.0939	0.2339	0.1839	0.893	0.6772	0.6381	0.2216	0.4871	0.4779	0.7009	0.1833	0.921	0.1028
FOXJ3	2068	RI	14.3	14.2	14.4	0	0.9791	0.7544	0.0753	0.0139	0.0027	0.0217	0.0854	0.0233	0.0345	0.0308	0.0567		0.038	0.0691	0.0684	0.0694	0.0277	0.0485	0.0465	0.0541	0	0.0202	0.0302	0.0519		0.0392	0.0348	0.064	0.1026	0.0536	0.0265	0.0948	0		0.0998	0.0462	0.0176	0.0144	0.0527	0.0245	0	0	0.1047
FOXJ3	2069	ES	10	9	11	0	0.9825	0.6333	0.095	0.7748	0.7827	0.8684	0.8704	0.8359	0.8224	0.7156	1		0.8942	0.7643	0.7402	0.8717	0.7996	0.7293	0.8647	0.5815	0.9284	0.8253	0.6368	0.8272		0.8843	0.5815	0.8594	0.8704	0.6696	1	0.8576	0.6875			0.894	0.8294	0.6587	0.7788	0.664	0.6494	1	0.7539
PPCS	2071	AP	1			0	0.9965	0.3481	0.0255	0.0373	0.1229	0.0556	0.0242	0.032	0.02	0.0385	0.03	0.0467	0.0193	0.0165	0.0765	0.0143	0.0137	0.0263	0.0307	0.0351	0.0151	0.0534	0.0548	0.0294	0	0.0095	0.0316	0.0177	0.0085	0.0205	0.033	0.023	0	0.0041	0.0538	0.0555	0.0404	0.0037	0.0152	0.091	0.0296	0.0435	0.0444
PPCS	2072	AP	2.1			0	0.9965	0.3481	0.0255	0.9627	0.8771	0.9444	0.9758	0.968	0.98	0.9615	0.97	0.9533	0.9807	0.9835	0.9235	0.9857	0.9863	0.9737	0.9693	0.9649	0.9849	0.9466	0.9452	0.9706	1	0.9905	0.9684	0.9823	0.9915	0.9795	0.967	0.977	1	0.9959	0.9462	0.9445	0.9596	0.9963	0.9848	0.909	0.9704	0.9565	0.9556
PPCS	2073	AT	4			0	1	0.1017	0.0135	0.9701	0.9101	0.9522	0.9597	0.9803	0.9621	0.9895	0.969	0.9976	0.947	0.9733	0.9591	0.942	0.9726	0.9725	0.9714	0.9794	0.9803	0.9329	0.9631	0.9869	0.9686	0.9812	0.9662	0.9514	0.9774	0.9872	0.9684	0.9645	0.97	0.9858	0.9795	0.963	0.9837	0.9829	0.9913	0.9554	0.9844	0.9727	0.9619
PPCS	2074	AT	3.2			0	1	0.1017	0.0135	0.0299	0.0899	0.0478	0.0403	0.0197	0.0379	0.0105	0.031	0.0024	0.053	0.0267	0.0409	0.058	0.0274	0.0275	0.0286	0.0206	0.0197	0.0671	0.0369	0.0131	0.0314	0.0188	0.0338	0.0486	0.0226	0.0128	0.0316	0.0355	0.03	0.0142	0.0205	0.037	0.0163	0.0171	0.0087	0.0446	0.0156	0.0273	0.0381
PPCS	2075	AD	2.2	2.1	3.1	0	1	0.6833	0.1053	0.7401	0.8883	0.6415	0.7137	0.8208	0.6622	0.8691	0.8091	0.6492	0.7969	0.821	0.7257	0.4069	0.5381	0.7014	0.7307	0.6879	0.8409	0.7527	0.7549	0.7467	0.799	0.5422	0.7055	0.8026	0.6247	0.6449	0.7306	0.8901	0.5619	0.4577	0.6235	0.582	0.7667	0.4532	0.5463	0.7725	0.7028	0.5974	0.7682
CCDC30	2079	AP	1			0	0.8412	1	0.1637	0.8961	0.8339	0.9705	0.924		0.8961				0.6107	0.6383	0.7583	0.5996	0.6672	0.8869	0.9002		0.9302	0.9386		0.836	0.6383		0.5677		0.8046	0.7754		0.6423			0.7585	0.876	0.9262	1	0.7153	0.9533		0.9339	0.846
CCDC30	2080	AP	15			0	0.8412	0.5425	0.0819	0	0	0	0		0				0	0	0	0	0.1038	0	0		0	0		0	0		0.2418		0	0		0.1238			0	0	0	0	0.0742	0		0	0
CCDC30	2081	AP	5.1			0	0.8412	1	0.1447	0.1038	0.1661	0.0295	0.076		0.1038				0.3893	0.3617	0.2417	0.4004	0.229	0.1131	0.0998		0.0698	0.0614		0.164	0.3617		0.1904		0.1954	0.2246		0.2339			0.2415	0.124	0.0738	0	0.2104	0.0467		0.0661	0.154
CCDC30	2082	AP	10			0	0.8412	0.2446	0.0195	0	0	0	0		0				0	0	0	0	0	0	0		0	0		0	0		0		0	0		0			0	0	0	0	0	0		0	0
PPIH	2095	AP	3.1			0	1	0.1568	0.0099	0.0103	0.0076	0.0048	0	0.0025	0.0039	0	0.0045	0	0.0027	0.0043	0.0054	0	0.0013	0.0045	0	0.0128	0.004	0.0149	0.0016	0	0.0109	0	0.0047	0	0	0	0.0067	0.0028	0	0.0007	0	0	0.0017	0.0019	0.0046	0.0142	0.0044	0	0.0115
PPIH	2096	AP	1			0	1	0.3223	0.0288	0.968	0.9919	0.9751	1	0.9661	0.9779	1	0.9498	0.9837	0.9823	0.9867	0.9612	0.9337	0.9715	0.9499	0.9849	0.9466	0.996	0.9682	0.9816	1	0.9661	0.9957	0.9757	0.937	0.8904	0.9562	0.979	0.9853	1	0.9963	0.9578	0.9937	0.9713	0.9572	0.9742	0.9659	0.991	0.9717	0.9885
PPIH	2097	AP	2.1			0	1	0.2914	0.0254	0.0217	0.0005	0.0202	0	0.0314	0.0182	0	0.0457	0.0163	0.015	0.009	0.0334	0.0663	0.0272	0.0456	0.0151	0.0406	0	0.0169	0.0168	0	0.023	0.0043	0.0197	0.063	0.1096	0.0438	0.0142	0.0119	0	0.003	0.0422	0.0063	0.027	0.0409	0.0213	0.02	0.0046	0.0284	0
PPIH	2100	AT	10			0	1	0.7278	0.0675	0.969	0.9431	0.9696	0.9314	0.9775	0.979	0.9709	0.9584	0.99	0.9742	0.9224	0.8813	0.8923	0.9191	0.9799	0.9525	0.9803	0.9448	0.931	0.9738	0.9628	0.9867	0.9657	0.952	0.9516	0.9381	0.9602	0.9608	0.9827	0.9636	0.9969	0.987	0.9955	0.9926	0.9855	0.9924	0.979	1	0.9987	0.9092
PPIH	2101	AT	9.2			0	1	0.7278	0.0675	0.031	0.0569	0.0304	0.0686	0.0225	0.021	0.0291	0.0416	0.01	0.0258	0.0776	0.1187	0.1077	0.0809	0.0201	0.0475	0.0197	0.0552	0.069	0.0262	0.0372	0.0133	0.0343	0.048	0.0484	0.0619	0.0398	0.0392	0.0173	0.0364	0.0031	0.013	0.0045	0.0074	0.0145	0.0076	0.021	0	0.0013	0.0908
PPIH	2103	AD	3.3	3.2	4	0	0.9983	0.2983	0.025	0.0271	0.0573	0.0327	0.0566	0.0195	0.0573	0.0236	0.0365	0.0046	0.041	0.0349	0.0555	0.0722	0.0636	0.049	0.0451	0	0.0235	0.0509	0.0403	0.0124	0.056	0.0136	0.0468	0.015	0.0563	0.0201	0.0525	0.0398	0.0303	0	0.0656	0.0305	0.0058	0.0101	0.0095	0.0317	0.0118	0.0113	0.0573
LEPRE1	2106	RI	14.3	14.2	14.4	0	0.9791	0.9749	0.1929	0.4266	0.7911	0.6565	0.6004	0.3953	0.6245	0.4066	0.3659	0.6532	0.5369	0.5197	0.8571	0.8413	0.6554	0.4396	0.2651	0.7741	0.4691	0.3107	0.2458	0.8242	0.3377	0.767	0.785	0.7808	0.5446	0.5649	0.398	0.7033	0.8523	0.448	0.4455	0.3764	0.179	0.7829	0.307	0.2059	0.1419	0.4266	0.448
LEPRE1	2107	RI	14.2:14.3	14.1	14.4	0	0.9965	0.6249	0.0873	0.141	0.1821	0.1907	0.2746	0.069	0.1402	0.0683	0.1049	0.2995	0.234	0.1783	0.3333	0.3622	0.168	0.1064	0.1181	0.1802	0.1195	0.0722	0.1172	0.1517	0.1905	0.1968	0.307	0.2626	0.2691	0.2232	0.2143	0.3071	0.62	0.1275	0.1427	0.1097	0.0474	0.1387	0.1076	0.0671	0.0282	0.1118	0.1144
LEPRE1	2108	AD	14.2	14.1	14.4	0	0.986	0.4806	0.0763	0.2623	0.0623	0.1498	0.3001	0.1493	0.1003	0.1134	0.2598	0.2653	0.2519	0.2235	0.0897	0.1182	0.1146	0.1887	0.2768	0.1413	0.2238	0.1667	0.3561	0.0609	0.3727	0.1481	0.2004	0.1444	0.2811	0.2094	0.3459	0.2793		0.1628	0.2361	0.2729	0.2406	0.0562	0.2507	0.2775	0.1657	0.1603	0.1739
C1orf50	2109	AT	5			0	1	0.2403	0.0398	0	0.0292	0.0235	0.0753	0	0.0175	0.216	0	0	0.1321	0.0318	0	0	0.1378	0.0148	0.0304	0	0.0592	0	0.0445	0.0892	0	0.2403	0.0371	0.0936	0.1258	0	0.0527	0	0	0	0.087	0	0.0407	0	0	0	0.0305	0.0133	0
C1orf50	2110	AT	4.3			0	1	0.3455	0.0513	1	0.9708	0.9765	0.9247	1	0.9825	0.784	1	1	0.8679	0.9682	1	0.975	0.7939	0.9852	0.9469	1	0.9408	1	0.9224	0.8942	0.9791	0.7597	0.9629	0.9064	0.8118	1	0.9473	0.8932	1	1	0.7838	1	0.929	1	1	1	0.9695	0.9867	0.9436
C1orf50	2111	AT	8			0	1	0.1878	0.0238	0	0	0	0	0	0	0	0	0	0	0	0	0.025	0.0683	0	0.0226	0	0	0	0.0331	0.0166	0.0209	0	0	0	0.0624	0	0	0.1068	0	0	0.1292	0	0.0303	0	0	0	0	0	0.0564
C1orf50	2112	AA	2.1	1.3	2.2	0	0.9476	0.5828	0.0612	0	0.0852	0.1932	0.0216	0.0773	0.1522		0	0.0852	0.1142	0.0852	0.0993	0.0811	0.0337	0.0342	0.0291	0	0.067	0.0165	0.1142	0.0483	0.1932	0.157	0.1288	0	0	0.0281		0.205	0.0653	0.1226	0.0531	0.071	0.0457	0.0565	0.0337	0	0.0324	0.0347
C1orf50	2115	ES	1.2:1.3:2.2	1.1	3	0	0.8569	0.4394	0.0931	1	1	1	1		1		1		1	1	0.8381	1	1	1	0.8359	0.6046	1	1	1	1	1	1	1	1	0.8699	0.7957	1	0.6694	1	0.7175	1	1	1		1	1	0.5831	1
C1orf50	2116	ES	1.3:2.2	1.1	3	0	0.9878	0.2094	0.0175	1	1	1	1	1	1	1	1	1	1	1	0.9777	1	1	1	0.9749	0.9422	1	1	1	1	1	1	1	1	0.9856	0.9801	1	0.9693	1	0.9765	1	1	1	1	1	1	0.9424	1	1
C1orf50	2117	RI	1.2	1.1	1.3	0	0.8237	0.7014	0.1102	0.1246	0.3389		0.3197	0.0344	0.2993		0.0752	0.0575	0.1178	0.2993	0.1596	0.0965	0.1189	0.1003	0.1547	0.1088	0.0965	0.379	0.3681		0.1596	0.1547	0.3571	0.0839	0.131	0.1088		0.0867	0.1246	0.0787	0.1982	0.2746	0.1189		0.1023	0.268	0.1246	0.4607
CCDC23	2118	AP	2			0	0.9965	0.2664	0.0366	0.0309	0.0574	0.0359	0.0766	0.0165	0.0571	0	0.0805	0.0072	0.0151	0.0373	0.0354	0.1449	0.0477	0.0823	0.0541	0	0.026	0.0835	0.025	0.0422	0.0443	0.0255	0.0577	0.0119	0.0961	0.0317	0.0455	0.0483	0.146	0.0849	0.0096	0.1519	0.0663	0.1064	0.0528	0.0578	0.0186	0.1275	0.0269
CCDC23	2119	AP	1			0	0.9965	0.2664	0.0366	0.9691	0.9426	0.9641	0.9234	0.9835	0.9429	1	0.9195	0.9928	0.9849	0.9627	0.9646	0.8551	0.9523	0.9177	0.9459	1	0.974	0.9165	0.975	0.9578	0.9557	0.9745	0.9423	0.9881	0.9039	0.9683	0.9545	0.9517	0.854	0.9151	0.9904	0.8481	0.9337	0.8936	0.9472	0.9422	0.9814	0.8725	0.9731
CCDC23	2120	RI	4.2	4.1	4.3	0	1	0.0713	0.007	1	1	0.9917	0.9941	0.994	1	0.9893	1	0.9961	0.9851	0.9843	0.9921	1	1	0.9863	0.9918	1	0.9876	0.9958	0.99	1	0.9864	0.9834	0.9931	0.9894	0.9953	0.9944	0.9792	1	1	1	1	0.9982	0.99	1	0.9918	1	0.993	0.9957	0.99
ERMAP	2121	AP	2.1			0	0.986	0.5595	0.0577	0	0	0.0439	0.2379	0.1166	0	0	0.1907	0	0.0629	0.0962	0.0178	0	0.0353	0.0654	0.0308	0	0	0	0	0		0	0	0.1469	0.1937	0.0479	0	0	0	0	0	0	0	0.0397	0	0	0	0.0964	0.2037
ERMAP	2122	AP	3.1			0	0.986	1	0.1722	0.2011	0.1512	0.1395	0.2133	0.4353	0.1272	0.2257	0.3205	0.7195	0.2115	0.2874	0.7083	0.2591	0.1803	0.3055	0.2187	0.1863	0.2008	0.1003	0.1394	0.593		0.6998	0.7445	0.3199	0.434	0.2149	0.4311	0.3893	0.547	0.0885	0.672	0.1277	0.1387	0.0963	0.294	0.1083	0.0885	0.1621	0.2092
ERMAP	2123	AP	1			0	0.986	1	0.188	0.7989	0.8488	0.8165	0.5488	0.4481	0.8728	0.7743	0.4888	0.2805	0.7256	0.6164	0.2738	0.7409	0.7844	0.629	0.7505	0.8137	0.7992	0.8997	0.8606	0.407		0.3002	0.2555	0.5332	0.3723	0.7372	0.5689	0.6107	0.453	0.9115	0.328	0.8723	0.8613	0.864	0.706	0.8917	0.9115	0.7415	0.5872
ERMAP	2124	RI	3.3	3.2	3.4	0	0.8534	1	0.2003	0.0951	0.3534	0.0951	0.1068	0.1351		0.4505	0.1855	1	0.1385	0.1459	0.8896	0.1753	0.3012	0.2311	0.3636	0.1083	0.3297	0.0694	0.1633			0.0835		0.2791	0.4412	0.2146	0.4505	0.4291					0.1974	0.0376	0.1855			0.4059	0.2146
ZNF691	2131	AD	2.2:2.3	2.1	4	0	0.9093	0.9364	0.2008	0.6708	0.5041	0.6075	0.8903	1	0.7507	0.6436	1	1	0.7701	0.9178	0.9405	0.937	0.9041	0.6337	0.85			0.5676	0.7394	0.7935	0.8241	0.8031	0.9092	1	0.8684	0.6153	0.8774	0.8308	1	0.5243	0.5178	0.6423	0.311	0.5349	1	0.782	0.572	0.3805	0.599
ZNF691	2132	ES	2.3	2.1	4	0	0.7853	0.829	0.1887	0.7651	0.2933		0.8765	1	0.8507	0.566	1	1	0.6697	0.9029	0.8794	0.8372	0.8551	0.7689	0.8637	0.8213	0.7545	0.6335	0.6759	0.725	0.7444				0.6633	0.171	0.7283	0.8779		0.6565		0.7563	0.7827	0.7773	1	0.8742		0.8267	0.7238
ZNF691	2135	ES	2.1:2.2:2.3	1	4	0	0.9494	1	0.2208	0.4701	0.6014	0.5807	0.4756	0.2809	0.2188	0.1088	0.3594	0.5039	0.5185	0.8984	0.5797	0.744	0.2927	0.1794	0.3424	0.076	0.0455	0.5874	0.5736	0.499	0.5803	0.655	0.7084	0.2168	0.8903	0.6085	0.87	0.3131	1	0.1172	0.6318	0.0657	0.0727	0.2457	0.2271	0.1268	0.6076	0.173	0.7654
ZNF691	2136	ES	2.1:2.3	1	4	0	0.8813	1	0.1925	0.6169	0.4787		0.4588	0.5494	0.4119	0.2852	0.7317	0.6771	0.4551	0.9002	0.5437	0.7844	0.3821	0.4937	0.4299	0.3659	0.5555	0.7089	0.5905	0.4849	0.6583		0.6168	0.1921	0.7695	0.2384	0.7211	0.507		0.1656		0.095	0.4693	0.6315	0.3022	0.525		0.7673	0.908
ZNF691	2137	ES	2.1	1	4	0	0.8098	0.8886	0.1946	0.3748	0.6971	0.5816	0.1361	0	0.112	0.3574			0.2729		0.201	0.4649	0.158	0.2919	0.1265		0.38	0.6759	0.5387	0.3476		0.3602	0.5159	0	0.6729	0.6207		0.1341		0.2608		0.2022	0.2263	0.3926	0	0.2705	0.7985	0.5468	0.8372
SLC2A1	2138	AT	7			0	1	0.1435	0.0116	0.0019	0.0099	0.0068	0.0233	0.0015	0.0075	0.001	0.0053	0.0138	0.0117	0.0082	0.0168	0.0266	0.0561	0.0067	0.0349	0.0055	0.0123	0.0143	0.0071	0.0104	0.0128	0.0046	0	0.0116	0.0023	0.0106	0.0114	0.0049	0.0065	0.0009	0.001	0.0112	0.0008	0.0149	0.0115	0.0114	0.0061	0.0024	0
SLC2A1	2139	AT	4.3			0	1	0.0977	0.01	0.0012	0.0012	0.0172	0.0021	0.0058	0	0	0.0017	0	0.0119	0.0062	0.0071	0.0335	0.0235	0.0079	0.0037	0	0.0047	0.018	0.0034	0.0078	0	0	0.0083	0.0029	0.0118	0.0056	0	0.0057	0.0136	0.0006	0.0025	0.0053	0.0004	0	0.0045	0.0036	0	0	0.0054
SLC2A1	2140	AT	11			0	1	0.2247	0.0194	0.9969	0.9889	0.976	0.9746	0.9927	0.9925	0.999	0.993	0.9862	0.9764	0.9856	0.976	0.9399	0.9204	0.9855	0.9614	0.9945	0.9831	0.9677	0.9895	0.9817	0.9872	0.9954	0.9917	0.9854	0.9859	0.9839	0.9886	0.9894	0.9799	0.9985	0.9965	0.9836	0.9989	0.9851	0.984	0.985	0.9939	0.9976	0.9946
FAM183A	2141	AP	1			0	0.7993	1	0.2789	0.0193	0.4493	0.0093	0.0051		0.1694	0.9099	0.4179	0.4365	0.3593	0.4098	0.8177	0.5618	0	0.1009	0.2721			0.0619	0.4953	0.5905		0.0385	0.4225	0	0.4786	0.0438	0.1286	0.5393			0.1994	0.6218	0.8693	0.1569	0.0314			0.5049
FAM183A	2142	AP	2.1			0	0.7993	1	0.2789	0.9807	0.5507	0.9907	0.9949		0.8306	0.0901	0.5821	0.5635	0.6407	0.5902	0.1823	0.4382	1	0.8991	0.7279			0.9381	0.5047	0.4095		0.9615	0.5775	1	0.5214	0.9562	0.8714	0.4607			0.8006	0.3782	0.1307	0.8431	0.9686			0.4951
EBNA1BP2	2145	AP	2.1			0	0.9948	0.4168	0.0498	0.9874	0.9696	0.8838	0.9425	0.961	0.9627	0.9929	0.9753	0.956	0.9747	0.9934	0.9521	0.9786	0.9534	0.9775	0.987	0.9733	0.9844	0.9436	0.9723	0.9636	0.988	0.9716	0.9588	0.9862	0.965	0.9363	0.9391	0.9468	0.9752	0.9844	0.9641	0.9677	0.9867	0.9022	0.8766	1	0.9936	0.9915	0.9923
EBNA1BP2	2146	AP	1			0	0.9948	0.4168	0.0498	0.0126	0.0304	0.1162	0.0575	0.039	0.0373	0.0071	0.0247	0.044	0.0253	0.0066	0.0479	0.0214	0.0466	0.0225	0.013	0.0267	0.0156	0.0564	0.0277	0.0364	0.012	0.0284	0.0412	0.0138	0.035	0.0637	0.0609	0.0532	0.0248	0.0156	0.0359	0.0323	0.0133	0.0978	0.1234	0	0.0064	0.0085	0.0077
WDR65	2147	AT	12.3			0	0.8325	0.7766	0.0644	0	0	0.0072	0.0118	0	0		0	0				0	0	0	0	0.0132		0.0412		0.0245		0	0.0127	0.0363	0.0432	0.0205	0.0234	0	0	0	0.0791		0	0	0.0021	0		0.0039
WDR65	2148	AT	24			0	0.8325	0.7766	0.0644	1	1	0.9928	0.9882	1	1		1	1				1	1	1	1	0.9868		0.9588		0.9755		1	0.9873	0.9637	0.9568	0.9795	0.9766	1	1	1	0.9209		1	1	0.9979	1		0.9961
TMEM125	2153	AA	2.1	1	2.2	0	0.9651	0.9357	0.1332	0.2367	0.3247	0.2179	0.2844	0.191	0.2172	0.5379	0.4127	0.1806	0.3247	0.1462	0.3438	0.2651	0.1865	0.1496	0.3273	0.1756	0.3032	0.3554	0.7503	0.6579	0.3147	0.2172	0.3504	0.1744	0.2267	0.1776	0.2973	0.4519	0.2518	0.2219	0.2579	0.3651	0.3282	0.2044	0.2138	0.3112		0.3017	0.4323
C1orf210	2154	AD	1.2	1.1	2	0	0.986	0.2612	0.0415	1	0.9876	1	0.9539	0.9247	1	1	1	0.9482	0.8171	0.9482	0.9809	0.7712	0.9696	0.9873	0.9742	0.9657	0.9251	0.9742	0.9746	0.926	0.9652	0.8584	0.9705	0.9797	0.9202	0.9737	0.8805	0.7783	1	0.9415	0.9406	0.9706	0.9649	0.9037	0.9647	0.9409		0.9563	0.9113
TIE1	2158	AT	8			0	1	0.2747	0.0177	0.0252	0	0.0417	0.0245	0.0059	0.0129	0	0	0	0.024	0.016	0.0614	0.0341	0.0303	0.0073	0.0341	0.0508	0.0252	0.0354	0	0	0	0	0.0089	0	0	0.0231	0	0.0076	0	0	0	0	0.0105	0	0	0	0	0	0.028
TIE1	2159	AT	24			0	1	0.2747	0.0177	0.9748	1	0.9583	0.9755	0.9941	0.9871	1	1	1	0.976	0.984	0.9386	0.9659	0.9697	0.9927	0.9659	0.9492	0.9748	0.9646	1	1	1	1	0.9911	1	1	0.9769	1	0.9924	1	1	1	1	0.9895	1	1	1	1	1	0.972
TIE1	2160	ES	07:09:00	6	10	0	0.9878	0.1223	0.0106	1	1	1	1	0.9633	1	1	1	1	1	1	1	1	1	1	1	1	1	1	1	1	0.9357	1	1	1	1	1	1	1	1				1	1	1	1	0.9929	1	1
TIE1	2162	ES	7	6	9	0	0.9825	0.4287	0.0779	0.827	0.7526	0.8877	0.8697	0.8727	0.9458	0.8083	0.7981	1	1	0.8048	1	0.7939	0.9433	0.9708	0.9038	0.8992	0.8512	0.8758	0.8733	1	0.7968	0.8992	0.8315	1	0.7644	1	0.7644	0.7462	0.5748				0.8106	0.8588	0.7849	0.9204	0.9196	0.7644	0.7586
CDC20	2165	AP	2.1			0	0.7871	0.795	0.0846	0.172	0.102	0.1681	0.1773	0.0959	0.1391	0.0229	0.0277		0.1051	0.1109	0.0839		0.1538	0.128	0.0571		0.0748	0.1702	0.1328	0.114	0.0571	0.1391		0.055	0.1217	0.1499		0.0941	0.1951	0.1538	0.4531	0.3872	0.063	0.2795	0.2205	0.2488	0.2169	0	0.4024
CDC20	2166	AP	1			0	0.7871	0.795	0.0846	0.828	0.898	0.8319	0.8227	0.9041	0.8609	0.9771	0.9723		0.8949	0.8891	0.9161		0.8462	0.872	0.9429		0.9252	0.8298	0.8672	0.886	0.9429	0.8609		0.945	0.8783	0.8501		0.9059	0.8049	0.8462	0.5469	0.6128	0.937	0.7205	0.7795	0.7512	0.7831	1	0.5976
ELOVL1	2167	ES	4	3	5	0	1	0.1072	0.0055	0.9975	1	0.9976	1	0.9934	1	0.9946	0.9976	1	0.9922	0.9981	0.9875	1	1	1	1	1	1	0.9983	1	0.9952	1	0.9972	1	0.9971	0.9897	1	1	0.9851	1	0.9956	1	1	0.9985	1	0.9987	0.9958	0.997	1	0.9861
MED8	2170	RI	7.2	7.1	7.3	0	1	0.1262	0.0213	0.9461	0.9375	0.9628	0.993	0.9396	0.9705	0.9921	0.9931	0.9762	0.9936	0.9828	1	0.993	0.966	0.9511	0.9547	0.9328	0.9743	0.9504	0.9783	0.9815	0.9428	0.9939	0.9765	0.9792	0.9916	0.9659	1	0.9847	0.9854	0.9865	0.9883	0.9815	0.9742	0.9646	0.976	0.9832	0.9562	0.9446	0.9873
MED8	2171	AA	3.1	2.2	3.2	0	1	0.0519	0.0087	1	1	1	1	1	0.9769	1	1	0.9711	0.98	1	1	1	0.9928	1	1	1	0.9894	0.9964	0.9924	0.9946	1	1	1	0.9932	0.9858	1	1	1	1	1	1	0.9908	1	0.9853	1	1	0.9877	1	1
MED8	2172	AA	2.1	1	2.2	0	0.9965	0.6116	0.0567	0.0778	0.0841	0.0919	0.0857	0.099	0.1199	0.0688	0.1259	0.159	0.0833	0.1686	0.2513	0.103	0.0663	0.08	0.0865	0.0896	0.0625	0.0801	0.091	0.1112	0.2825	0.21	0.0944	0.1225	0.1887	0.1837	0.1287	0.1368	0.0558	0.0573	0.1133	0.1625	0.0379	0.1089	0.1475	0.099	0.0585	0.0307	0.1489
SZT2	2175	AT	7			0	1	0.4878	0.0641	0.1425	0.1674	0.113	0.1469	0.262	0.1212	0.2883	0.1205	0.1012	0.1547	0.1934	0.1338	0.1148	0.1289	0.1137	0.112	0.0939	0.2004	0.2114	0.1319	0.1229	0.1044	0.0835	0.1244	0.2219	0.0908	0.0969	0.2125	0.0952	0.1604	0.2582	0.2513	0.1667	0.2607	0.3511	0.1704	0.5582	0.2432	0.1327	0.1711
SZT2	2176	AT	5			0	1	0.4882	0.0596	0.1258	0.1098	0.1248	0.1172	0.0642	0.0994	0.0762	0.0934	0.0644	0.1278	0.1497	0.1495	0.142	0.1175	0.0753	0.1134	0.1092	0.1466	0.1091	0.1094	0.1522	0.0823	0.1673	0.1335	0.1373	0.1097	0.1402	0.0726	0.0774	0.1704	0.19	0.0976	0.1491	0.1332	0.0422	0.1351	0.0456	0.1113	0.081	0.1429
SZT2	2177	AT	74			0	1	0.7267	0.0981	0.7317	0.7228	0.7621	0.7359	0.6738	0.7794	0.6355	0.7861	0.8344	0.7175	0.6569	0.7167	0.7432	0.7537	0.811	0.7746	0.7969	0.653	0.6795	0.7587	0.7249	0.8133	0.7492	0.7421	0.6408	0.7995	0.7629	0.7149	0.8274	0.6692	0.5518	0.6512	0.6842	0.6061	0.6067	0.6945	0.3963	0.6456	0.7864	0.686
HYI	2181	AT	8.3			0	0.9965	0.2686	0.0433	0.0811	0.068	0.0356	0.0666	0.0255	0.0526	0.133	0.0857	0.0219	0.1355	0.0787	0.2056	0.0842	0.0492	0.1292	0.0707	0.0415	0.0734	0.1133	0.0677	0.1113	0.0698	0.0909	0.1088	0.1343	0.0674	0.0626	0.0688	0.0707	0.1081	0.0305	0.0923	0.0207	0.1152	0.0246	0.0269	0.0481	0.0585	0.0165	0.0804
HYI	2182	AT	9			0	0.9965	0.2686	0.0433	0.9189	0.932	0.9644	0.9334	0.9745	0.9474	0.867	0.9143	0.9781	0.8645	0.9213	0.7944	0.9158	0.9508	0.8708	0.9293	0.9585	0.9266	0.8867	0.9323	0.8887	0.9302	0.9091	0.8912	0.8657	0.9326	0.9374	0.9312	0.9293	0.8919	0.9695	0.9077	0.9793	0.8848	0.9754	0.9731	0.9519	0.9415	0.9835	0.9196
HYI	2183	AD	8.2	8.1	9	0	0.9948	0.7522	0.09	0.3955	0.3954	0.3697	0.2705	0.2976	0.3482	0.4926	0.2463	0.3347	0.2436	0.3132	0.1986	0.3222	0.3775	0.3448	0.3415	0.391	0.3449	0.24	0.4157	0.2707	0.2606	0.2866	0.3359	0.242	0.3105	0.3621	0.3614	0.335	0.2174	0.2476	0.4673	0.217	0.339	0.3027	0.3897	0.3468	0.2743	0.2294	0.35
HYI	2184	ES	3	2.1	4	1	0.8953	0.5385	0.1012	0.7577	0.913	0.7754	0.8784		0.7602	0.8717	0.7813	0.7715		0.8104		0.8907	0.8099	0.8393	0.7607	0.6617	0.727	0.7765	0.7144	0.8664	0.9656		0.8653	0.7443	0.8253	0.8544	0.7788	0.8206		0.5436		0.6735	0.8789	0.6984	0.6102	0.8995		0.8065	0.8224
HYI	2185	AD	2.2	2.1	4	1	0.8953	0.3041	0.0465	0.907	0.9615	0.8976	0.9496		0.8366	0.9311	0.9122	0.8608		0.8655		0.9409	0.9117	0.922	0.8867	0.901	0.9054	0.8938	0.808	0.8762	0.9684		0.9167	0.9104	0.9385	0.9466	0.8052	0.8938		0.8371		0.88	0.9538	0.9309	0.9135	0.9484		0.9405	0.8959
PTPRF	2186	AP	1			0	0.9511	0	0	1	1	1	1	1	1	1	1		1	1	1	1	1	1	1	1	1	1	1	1		1	1	1	1	1	1	1	1				1	1	1	1	1	1	1
PTPRF	2188	AP	3.1			0	0.9511	0	0	0	0	0	0	0	0	0	0		0	0	0	0	0	0	0	0	0	0	0	0		0	0	0	0	0	0	0	0				0	0	0	0	0	0	0
PTPRF	2189	ES	23	22	24	0	0.9983	0.1301	0.0183	0.0208	0.0851	0.0137	0.0085	0.0033	0.0064	0.1123	0.0046	0.0283	0.0146	0.0911	0.0083	0.0071	0.0127	0.0033	0.0044	0.0095	0.0027	0.0086	0.0264	0.0017	0	0	0.0205	0.0137	0.0123	0.007	0.0096	0.0027	0.0494	0.0159	0.0514	0	0.0062	0.0089	0.0061	0.0036	0.0678	0	0.0058
PTPRF	2190	ES	14	13	15	0	0.9878	0.9619	0.143	0.1448	0.6101	0.2003	0.3333	0.2998	0.0775	0.1374	0.3052		0.5148	0.811	0.1874	0.3095	0.2598	0.1812	0.2283	0	0.1594	0.3091	0.393	0.0642		0.1053	0.1025	0.0274	0.3063	0.2801	0.2767	0.0276	0.3877	0	0.3158		0.1009	0.3163	0.0991	0.0507	0.0609	0.3755	0.1727
PTPRF	2191	ES	12	11	13	0	1	0.3009	0.0195	1	1	0.9821	0.9954	1	0.9931	0.9393	1	1	0.9586	0.9943	0.978	1	0.9957	0.9975	1	1	0.986	0.9827	1	0.9949	1	1	0.9869	1	1	1	1	1	1	0.6991	1	1	0.9972	1	0.9794	0.9927	1	1	1
ST3GAL3	2195	AT	21			0	1	0.3332	0.0394	0.9919	0.9346	0.9568	0.9806	0.9638	0.9774	0.9193	0.9758	0.9913	0.9664	0.9269	0.9353	0.9497	0.9588	0.9618	0.9803	0.9827	0.9686	0.9632	0.9141	0.9888	0.9786	0.9559	0.9091	0.9592	0.9872	0.9587	0.9457	0.9605	0.8919	0.9857	1	1	0.9889	1	0.9875	1	0.9937	1	0.9387
ST3GAL3	2197	AT	18			0	1	0.3332	0.0394	0.0081	0.0654	0.0432	0.0194	0.0362	0.0226	0.0807	0.0242	0.0087	0.0336	0.0731	0.0647	0.0503	0.0412	0.0382	0.0197	0.0173	0.0314	0.0368	0.0859	0.0112	0.0214	0.0441	0.0909	0.0408	0.0128	0.0413	0.0543	0.0395	0.1081	0.0143	0	0	0.0111	0	0.0125	0	0.0063	0	0.0613
ST3GAL3	2198	AA	19.1	16.2	19.2	0	0.9948	0.0918	0.0062	1	1	1	1	1	1	1	1	1	1	1	1	1	1	1	1	1	1	1	1	1	1	1	1	1	1	1	0.9645	1	1	1	1	1	1	1	1	1	1	1	1
ST3GAL3	2199	ES	19.1:19.2:20	16.2	21	0	0.9983	0.1978	0.0239	1	1	1	0.9665	0.9657	1	1	0.9424	1	0.8837	1	0.9879	0.9686	0.9797	0.9807	1	1	0.9695	0.9861	1	1	1	1	0.9864	1	1	1	0.942	1	1	1	1	1	0.9873	1	0.9859	1	0.9552	1	1
ST3GAL3	2201	ES	16.1:16.2:19.1:19.2:20	15.1	21	0	0.7574	0.6336	0.1055	1	0.8715	1	1	1			1	1			1	1	1	1	1	0.605	1	0.7918	1	1	1	1	1	1	1	1	1		1	1		1	0.8259	1	0.7851		1		1
ST3GAL3	2202	ES	16.2:19.1:19.2:20	15.1	21	0	0.9983	0.0899	0.0114	1	0.972	1	1	1	0.9561	1	1	1	1	1	1	1	1	1	1	0.9742	1	0.9845	1	1	1	1	1	1	1	1	1	1	1	1	1	1	0.9858	1	0.9842	1	1	1	1
ST3GAL3	2210	ES	16.2	15.1	19.1	0	0.9948	0.1959	0.0187	1	1	1	1	1	1	1	1	1	0.8773	1	1	1	1	1	1	1	1	1	1	1	1	1	1	0.9455	1	1	1	1	1	1	1	1	0.981	1	1	1	1	1
ST3GAL3	2211	AA	16.1	15.1	16.2	0	0.8866	0.5946	0.0737	0.0414	0.1732	0.1774	0.0753	0.1793	0	0	0.1964	0.0534	0.0625		0.0296	0.1038	0.105	0.1401	0.0663	0.0414	0.1636	0.0591		0.1014	0.1358	0.1131	0.1497	0.1732	0.1089	0.0354	0.2683						0.0683	0.2075	0.0599	0	0.0391	0	0
ST3GAL3	2213	ES	14:15.1:16.2:19.1:19.2:20	13	21	0	0.9983	0.3417	0.0186	1	1	1	1	1	1	1	1	0.9225	1	1	1	1	0.9774	1	1	1	1	0.9846	1	1	1	1	1	1	1	1	1	1	1	1	1	1	1	1	0.9696	1	0.9487	1	1
ST3GAL3	2223	ES	14:15.1:16.2	13	19.1	0	0.9965	0.1572	0.0099	1	1	1	0.9634	1	1	1	1	1	1	1	1	1	1	1	1	1	0.958	1	1	1	1	1	1	1	1	0.9676	1	1	1	1	1	1	1	1	1	1	1	1
ST3GAL3	2232	ES	10:13:14:15.1:16.2:19.1:19.2:20	9	21	0	0.9651	0.5183	0.0242	1	1	1	1	1		1	1	1	1	1	1	1	1	1	1	1	1	1	1	1	1	1	1	1	1	1	1	1	1	1			1	1	1	1	1	1
ST3GAL3	2233	ES	13:14:15.1:16.2:19.1:19.2:20	9	21	0	0.9948	0.0833	0.0042	1	1	1	1	1	1	1	1	1	1	1	1	1	1	1	1	1	1	1	1	1	1	1	1	1	1	1	1	1	1	1	1	1	1	1	1	1	1	1
ST3GAL3	2271	ES	11:12:00	9	13	0	0.9127	0.7454	0.0706	0.0512	0.0305	0.0473	0	0.1011	0.0592	0			0.0563	0.1775	0.1803	0	0	0.0277	0	0.169	0	0.028	0.1189	0.0335	0.2504	0.0158	0.0392	0.0811	0.0527	0.0259	0.1168						0	0	0.0138	0.0229	0	0
ST3GAL3	2272	ES	12	9	13	0	0.925	0.6692	0.1031	0	0	0.2132	0.1835	0.4569	0	0.1443		0.3024	0.0584		0.214	0.046	0.1092	0.0939	0.0832	0	0.1869	0.0575		0.0481	0	0.2103	0.1911	0.1358	0.2061	0.1871	0						0.2047	0.3598	0.0502	0.0459	0.022	0.0595	0.2124
ST3GAL3	2273	ES	10	9	13	0	0.9773	0.8389	0.1192	0.0458	0.1007	0.2873	0.1184	0.3732	0.036	0.1313	0.1677	0.4492	0.2514	0.5733	0.3627	0.0458	0.1656	0.1119	0.1342	0.1342	0.1324	0.0727	0.1258	0.1007	0.2053	0.2742	0.1638	0.3496	0.1707	0.1785	0.2514	0.1677	0.2514	0.183			0.3149	0.3739	0.0937	0.2255	0.0429	0.1119	0.4249
ST3GAL3	2296	ES	9	6	13	0	0.9773	0.1198	0.0116	1	1	1	1	1	1	1	1	1	1	1	1	1	1	1	1	1	1	1	1	1	1	1	1	1	1	1		1	1	1	1	1	1	1	1	1	1	1	1
ST3GAL3	2297	ES	7.1:7.2:8	6	9	0	0.7993	0.5991	0.0415	0	0.0049	0	0	0		0					0.0083	0.0384	0	0	0.0053			0.0138		0		0	0	0.0724	0	0		0.0606				0.0126	0.0696		0	0.008	0	0.1014	0
ST3GAL3	2298	ES	7.2:8	6	9	0	0.7714	0.1619	0.0135	0	0.0066	0	0	0		0					0.0129	0	0	0	0.0072			0.02		0		0	0	0	0	0						0.0169	0		0	0.0108	0		0
ST3GAL3	2299	ES	7.1:7.2	6	9	0	0.8848	0.5634	0.1014	0.3056	0.1867	0.1722	0.2197	0.2089		0.1379	0.2604		0.3953		0.1744	0.2376	0.1166	0.1653	0.0083		0.4842	0.1925		0.1234		0.0977	0.1135	0.0866	0.0502	0.1901		0.0914	0.1744			0	0.1986	0.1311	0.1353	0.1311	0.2138	0.1497	0.0977
ST3GAL3	2300	ES	7.2	6	9	0	0.7714	0.0735	0.0062	0	0	0	0	0		0					0	0	0	0	0.0139			0		0		0	0	0	0	0						0	0		0	0	0		0
ST3GAL3	2464	ES	04:06:09	3.1	13	0	0.9738	0.056	0.0024	1	1	1	1	1	1	1	1		1		1	1	1	1	1	1	1	1	1	1	1	1	1	1	1	1		1	1	1		1	1	1	1	1	1	1	1
ST3GAL3	2480	ES	4	3.1	6	0	0.9093	0.4811	0.0807	0.9275	0.8984	0.9509	1		0.8938	0.951	0.6983		1		0.9338	0.9073	0.957	0.9056	1	1	1	0.9751	1	0.9315		1	0.8215	0.9433	0.9055	0.9066		1		1		1	0.7837	0.8859	0.8694	0.8689	0.8233	0.9087	0.7082
ARTN	2483	AP	4.1			0	0.7644	1	0.2097	0.4885	0.6805	0.3318	0.3692	0.7686	0	0.9024	0.3462	0.5543	0.2764	0.6521	0.3808	0.6354	0.2355	0.6457	0.2294		0.7822	0.5095	0.6158	0.3961	0.5525	0.63	0.2488		0.6348		0.2303	0.4195		0.5874	0.4209	0.2462	0.5799		0.3442	0.5845			0.3019
ARTN	2485	AP	3.1			0	0.7644	0.9523	0.1576	0.2174	0.1082	0.3076	0.1369	0	0.5259	0	0.3066	0.0881	0.3076	0.1099	0.3245	0.1414	0.5677	0.1437	0.4254		0.1024	0.162	0.137	0.4407	0.2049	0.0539	0.2769		0.2355		0.3075	0.2876		0	0.1561	0.5477	0.0461		0.4256	0.1913			0.168
ARTN	2486	AP	1			0	0.7644	1	0.1736	0.2941	0.2113	0.3606	0.4939	0.2314	0.4741	0.0976	0.3473	0.3575	0.416	0.2379	0.2947	0.2231	0.1969	0.2106	0.3452		0.1154	0.3286	0.2471	0.1632	0.2425	0.316	0.4743		0.1297		0.4621	0.2929		0.4126	0.423	0.2062	0.374		0.2302	0.2242			0.5301
IPO13	2491	AP	16.1			0	0.9983	0.9207	0.1217	0.0832	0.0886	0.114	0.1053	0.0979	0.2783	0.0705	0.1993	0.9207	0.2124	0.1869	0.207	0.4455	0.1432	0.151	0.0631	0.0606	0.0563	0.038	0.1237	0.1658	0.6828	0.3717	0.2381	0.0925	0.361	0.2283	0.2506	0.2064	0.3472	0.1536	0.5268	0.2007	0.0154	0.0272	0.092	0.032	0.005	0.109	0.1217
IPO13	2492	AP	1			0	0.9983	0.9207	0.1217	0.9168	0.9114	0.886	0.8947	0.9021	0.7217	0.9295	0.8007	0.0793	0.7876	0.8131	0.7929	0.5545	0.8568	0.849	0.9369	0.9394	0.9437	0.962	0.8763	0.8342	0.3172	0.6283	0.7619	0.9075	0.639	0.7717	0.7494	0.7936	0.6528	0.8464	0.4732	0.7993	0.9846	0.9728	0.908	0.968	0.995	0.891	0.8783
DPH2	2496	ES	4	3.2	5	0	1	0.1522	0.0128	1	0.9913	1	1	1	1	0.9638	1	1	0.974	0.9854	1	0.9695	0.9798	0.9923	1	1	1	0.9925	0.9839	0.9885	1	1	1	1	1	1	1	1	1	0.8478	1	0.9699	0.9859	1	0.9767	0.9269	0.9605	1	1
DPH2	2497	ES	3.1:3.2	2.1	4	0	0.8377	0.4325	0.0784	1	0.9034	0.819	1	1	1	1	0.9358		1	1	1	0.9493	1	0.887	1		1	1	0.9077	1	1	1	1	0.8408	1	1	1	1	1	1	1	1	0.6661	1	1	1		1	1
DPH2	2499	ES	3.2	2.1	4	0	0.9913	0.4761	0.0254	1	0.9885	0.9449	1	1	1	1	0.9742	1	1	1	1	0.9637	1	0.9889	1	1	1	1	0.964	1	1	1	1	0.9736	1	1	1	1	1	1	1	1	0.9605	1	1	1	0.9781	1	1
DPH2	2500	AA	3.1	2.1	3.2	0	0.9564	0.8426	0.1017	0.2172	0.1063	0.2207	0.2226	0.0604	0.1591		0.2926		0.1472	0.1294	0.3328	0.4289	0.0649	0.0858	0.0967		0.1017	0.1269	0.2788	0.1654	0.3223	0.138	0.1145	0.1353	0.3447	0.2292	0.2709	0.1986	0.2292	0.1778	0.2647	0.2045	0.0812	0.0819	0.0589	0.0902	0.0224	0.0692	0.2292
DPH2	2501	AD	2.2	2.1	3.2	0	0.9442	0.774	0.0801	0.0944	0.0518	0.0309	0.0764	0.006	0.0922		0.176		0.0796	0.1132	0.0975	0.2409	0.0882	0.0727	0.0303		0.1132	0.0876	0.2114	0.2114		0.0935	0.0804	0.0449	0.1826	0.1005	0.0529	0.1189	0.1635	0.0199	0.2405	0.1016	0.0623	0.0324	0.0555	0.0584	0	0.0529	0.1153
DPH2	2502	AD	1.3	1.2	2.1	0	0.9546	0.0678	0.006	1	1	1	1	1	1		1		1	1	1	1	1	1	1	1	1	1	1	1	1	1	1	1	1	1	1	1	1	1		1	1	1	1	1	1	1	1
DPH2	2503	AD	1.2:1.3	1.1	2.1	0	0.9878	0.3737	0.0491	0.9413	0.9202	0.9651	0.937	0.9814	0.8946	0.7388	0.8716	1	0.9378	0.9553	0.9416	0.9553	0.9483	0.9193	0.8861	0.9096	0.9413	0.9322	0.9174	0.9121	1	0.9274	0.8736	0.8785	0.9311	0.8603	0.8684	0.9057	0.9353	1	0.8987	0.8293	0.9092	0.8544	0.8863	0.9335	0.9055	0.9001	0.9488
ATP6V0B	2505	AP	1.1			0	1	0.6146	0.0478	0.9627	0.9822	0.9774	0.9805	1	0.9655	0.9715	0.9674	0.9829	0.9749	0.9823	0.895	0.8592	0.9413	0.9484	0.9888	0.9837	0.9878	0.9869	0.9657	0.9353	0.9027	0.908	0.9453	0.9784	0.9064	0.9538	0.9777	0.9914	0.8822	0.9802	0.9339	0.9867	0.9819	0.9668	0.9902	0.9802	1	1	0.9439
ATP6V0B	2506	AP	3.1			0	1	0.6146	0.0478	0.0373	0.0178	0.0226	0.0195	0	0.0345	0.0285	0.0326	0.0171	0.0251	0.0177	0.105	0.1408	0.0587	0.0516	0.0112	0.0163	0.0122	0.0131	0.0343	0.0647	0.0973	0.092	0.0547	0.0216	0.0936	0.0462	0.0223	0.0086	0.1178	0.0198	0.0661	0.0133	0.0181	0.0332	0.0098	0.0198	0	0	0.0561
ATP6V0B	2509	RI	7.2	7.1	7.3	0	1	0.6745	0.0481	0.038	0.0182	0.0524	0.0789	0.0271	0.0586	0.0082	0.0413	0.0304	0.0612	0.0704	0.135	0.1239	0.0477	0.0292	0.0535	0.0383	0.0374	0.0322	0.0312	0.0856	0.0478	0.0483	0.0582	0.0626	0.1512	0.08	0.063	0.0545	0.0743	0.0092	0.0144	0.0127	0.0201	0.0236	0.0162	0.0952	0.0089	0.0124	0.09
ATP6V0B	2510	ES	2.1:2.2	1.1	3.2	0	0.9965	1	0.1507	0.3465	0.3306	0.2146	0.2671	0.1609	0.4984	0.2998	0.2526	0.1828	0.3362	0.2871	0.4736	0.4458	0.4924	0.2249	0.2342	0.1397	0.1363	0.3135	0.2012	0.2503	0.6601	0.4796	0.341	0.4221	0.1365	0.1908	0.5388	0.2295	0.2898	0.0665	0.1528	0.1581	0.1215	0.1037	0.2388	0.1848	0.0897	0.1586	0.4469
ATP6V0B	2511	ES	2.2	1.1	3.2	0	1	0.3016	0.028	0.9629	0.9756	0.9335	0.9344	0.9422	0.9485	0.9829	0.9527	0.9561	0.9059	0.9437	0.9407	0.9244	0.9636	0.9564	0.9689	0.966	0.9597	0.9552	0.9463	0.9354	0.981	0.973	0.9686	0.9688	0.6984	0.9231	0.9597	0.8917	0.9329	0.9255	0.887	0.9742	0.9582	0.9122	0.977	0.9452	0.9172	0.9592	0.9383
ATP6V0B	2512	AD	1.2	1.1	3.2	0	0.9721	0.5006	0.0688	0.0795	0.3071	0.0407	0.071	0.0295	0.1366	0	0.0733	0	0.0635	0.1771	0.1074	0.1263	0	0.13	0.076	0.1061	0.0392	0	0.0604	0	0.3339	0.1715	0	0.1532	0.0461	0.0474	0.1366	0.0475	0.1124	0.0307	0.0556	0.0178	0.0538	0	0	0.0433	0.0183	0.0909	0.0888
ATP6V0B	2513	AA	2.1	1.1	2.2	0	1	0.4085	0.0319	0.0228	0.0136	0.0212	0.0284	0.0141	0.0575	0.0087	0.019	0.0116	0.0547	0.0252	0.0597	0.07	0.0384	0.0143	0.0111	0.0063	0.0073	0.0228	0.0154	0.0246	0.0419	0.0294	0.0187	0.0255	0.0724	0.0224	0.0534	0.039	0.0335	0.0064	0.0267	0.0056	0.0068	0.0126	0.0083	0.0146	0.0099	0.0088	0.0554
B4GALT2	2514	AP	2.1			0	0.836	1	0.231	0.6486	0.168	0.8555	0.4432	0.2769	0.4134	0.5945	0.2273	0.2024	0.6456	0.3766	0.2925	0.4495	0.674	0.3919	0.6158		0.3881	0.3654	0.88		0.6527	0.4432	0.4688	0.0984	0.5365	0.1192	0.4384	0.3606	0.1511				0.5218		0.5037	0.845	0.3458		0.4036
B4GALT2	2515	AP	1			0	0.836	1	0.231	0.3514	0.832	0.1445	0.5568	0.7231	0.5866	0.4055	0.7727	0.7976	0.3544	0.6234	0.7075	0.5505	0.326	0.6081	0.3842		0.6119	0.6346	0.12		0.3473	0.5568	0.5312	0.9016	0.4635	0.8808	0.5616	0.6394	0.8489				0.4782		0.4963	0.155	0.6542		0.5964
B4GALT2	2516	AA	4.1	3	4.2	0	0.9895	0.0213	0.0027	1	1	1	1	0.9928	1	1	1	1	0.9953	1	1	1	1	1	1	1	1	1	1	1	1	1	1	0.9863	0.9931	1	1	1	1	0.9908	1	1	1	1	0.9915	0.9951	1	1	1
B4GALT2	2517	AD	2.2	2.1	3	0	0.9093	0.6415	0.1412	1	1	1	1	0.8244	1	1	1		0.9073	0.6356	1	0.8523	1	1	0.9185	1	1	1	0.8825	1	0.9117	1	1	1	0.6356	1	0.5603	1	0.7703	1	1	1	1	1	1	0.9096	0.7836		0.7897
CCDC24	2518	AP	2			0	0.8621	0.8013	0.1328	0.4158	0.4458	0.6278	0.5879		0.6806		0.4351	0.3835	0.6151	0.4695	0.2788	0.3858	0.501	0.4005	0.4671	0.1942	0.4405	0.3905	0.5034	0.3419	0.4229	0.5808	0.3186	0.1983	0.3312	0.2853	0.2989	0.2865	0.2655	0.3657		0.0773	0.5328	0.4236	0.5146	0.1785		0.3636	0.4915
CCDC24	2519	AP	3.1			0	0.8621	0.7718	0.1482	0.3716	0.5036	0.2805	0.389		0.3194		0.4537	0.5453	0.3849	0.447	0.4361	0.4827	0.4198	0.4791	0.4777	0.6074	0.4594	0.539	0.3937	0.1337	0.4961	0.4192	0.609	0.5584	0.6476	0.6086	0.7011	0.5377	0.5536	0.572		0.8437	0.4386	0.4141	0.3658	0.7911		0.5688	0.3075
CCDC24	2520	AP	1			0	0.8621	0.6325	0.1213	0.2126	0.0506	0.0917	0.0231		0		0.1112	0.0713	0	0.0835	0.2851	0.1315	0.0793	0.1204	0.0551	0.1985	0.1001	0.0705	0.1029	0.5244	0.0811	0	0.0724	0.2433	0.0212	0.1061	0	0.1757	0.1809	0.0623		0.079	0.0287	0.1624	0.1196	0.0304		0.0676	0.201
CCDC24	2523	AA	8.1	7.3	8.2	0	0.9407	0.3433	0.0535	0.9745	0.8372	0.874	0.9669	0.9451	0.9404	1	0.9773	0.9216	0.964	0.9293	0.9451	0.9398	0.9335	0.9281	0.9583	0.9199	0.9451	0.9693	1	0.8701	0.9232	0.8752	0.9214	0.9054	0.8918	0.9245	0.8516	0.9054	0.9404	0.9199	1	0.9025	0.9132	0.8875	0.9725	0.8999		0.9289	0.9421
CCDC24	2524	RI	7.2	7.1	7.3	0	0.9756	1	0.0732	0.0688	0.2807	0.0594	0.085	0.0986	0.1732		0.0409	0.0362	0.0807	0.0877	0.137	0.2	0.0089	0.1062	0.0615	0.07	0.028	0.0171	0.174	0.1062	0.0384	0.1609	0.104	0.1277	0.1371	0.0627	0.0882	0.134	0.0828	0.0477	0.0223	0.0864	0.0245	0.0073	0.0802	0.2084		0.1335	0.0828
CCDC24	2525	RI	6.3	6.2	6.4	0	1	0.9704	0.123	0.2297	0.3418	0.2812	0.2885	0.2271	0.4262	0.3941	0.3368	0.3302	0.4669	0.3354	0.4768	0.4621	0.3429	0.2001	0.236	0.2939	0.2467	0.2547	0.3231	0.4362	0.33	0.3873	0.4402	0.2691	0.4166	0.2712	0.3465	0.5503	0.3902	0.1897	0.3328	0.2209	0.1621	0.095	0.1952	0.1755	0.1717	0.118	0.5525
CCDC24	2526	AA	6.1	5	6.2	0	0.8796	0.6929	0.1126	0.3849	0.2165	0.1717	0.3982	0.1458	0.3259		0.3386	0.1947	0.3559	0.4057	0.2733	0.2973	0.3589	0.1947	0.2862	0.6171	0.1458	0.3513	0.2087	0.2438	0.2555	0.1458	0.3142	0.3086	0.392	0.2753	0.3672	0.0882		0.3672			0.3424	0.4057	0.1878	0.3767		0.4755
CCDC24	2527	ES	4.1:4.2:5:6.1	3.2	6.2	0	0.8621	0.8992	0.157	0.9096	0.8743	1	1		1		0.907	1	0.8638	1	0.7803	1	0.9202	1	0.7732	1	1	0.9089	1	0.6262	0.9278	0.5257	1	0.7073	0.8367	0.8377	0.8845	0.4419	1	1	1	0.3386	0.8244	1	1	1	0.7607	0.8003
CCDC24	2528	ES	4.2:5:6.1	3.2	6.2	0	0.8185	0.9714	0.1574	0.9275		1	1	1	1		0.904	1	0.836	1		1	0.9185	1	0.867	1	1	0.919	1	0.42	0.8833		1	0.7249	0.6798	0.871	0.7013		1	1		0.5192	0.919	1	1	1		0.8343
CCDC24	2530	ES	4.1:4.2:5	3.2	6.2	0	0.9686	0.5793	0.0882	0.94	0.9608	1	1	1	1	0.7872	0.9488	1	0.9179	1	0.9019	1	0.9525	1	0.8922	1	1	0.9472	1	0.835	0.9733	0.8635	1	0.8405	0.8856	0.9297	0.9278	0.8885	1	1	1	0.5076	0.8977	1	1	1	0.6154	0.8115	0.8443
CCDC24	2531	ES	4.2:5	3.2	6.2	0	0.9424	0.7714	0.1067	0.9522	0.7583	1	1	1	1		0.9472	1	0.8999	1	0.3777	1	0.9515	1	0.9407	1	1	0.9533	1	0.6865	0.9555	0.4578	1	0.852	0.7624	0.9454	0.7978		1	1	1	0.6852	0.955	1	1	1		0.8441	0.4936
CCDC24	2532	AA	4.1	3.2	4.2	0	0.9058	0.8688	0.1618	0.4637	0.8967	0.4731	0.7317	0.428	0.7364		0.5449	0.5957	0.5896	0.6605	0.9473	0.7996	0.5365	0.657	0.3745	0.2496	0.3595	0.4948	0.6706	0.7179	0.6662	0.8998	0.6423	0.5212	0.7453	0.4731	0.7955	1	0.6221	0.4112	0.6242		0.3288	0.5187	0.557	0.5793		0.4916	0.8682
SLC6A9	2533	AP	1			0	0.8778	0.6823	0.065	0.9414		0.9683	0.9598	1	1		0.9825		0.9126	0.9242	0.8564	1	0.8784	0.9577	0.8671	1	0.9443	0.9725		1			1	0.8452	1	0.819		0.983	1				0.9872	1	0.9863	1			0.9251
SLC6A9	2534	AP	3			0	0.8778	0.3324	0.0371	0.0586		0.0317	0.0157	0	0		0.0175		0.0874	0.0426	0.0561	0	0.0683	0	0	0	0.0218	0.0275		0			0	0.0376	0	0.0319		0	0				0.0128	0	0	0			0
SLC6A9	2535	AP	4			0	0.8778	0.3857	0.0413	0		0	0.0245	0	0		0		0	0.0332	0.0875	0	0.0533	0.0423	0.1329	0	0.034	0		0			0	0.1172	0	0.1491		0.017	0				0	0	0.0137	0			0.0749
SLC6A9	2536	AT	16			0	1	0.3289	0.0451	0.8543	0.817	0.9261	0.8476	0.9462	0.9425	0.8903	0.9272	0.9505	0.9129	0.8512	0.862	0.8986	0.7552	0.8885	0.8528	0.9148	0.8636	0.8174	0.8658	0.9248	0.9475	0.8712	0.9288	0.8885	0.9444	0.9024	0.9271	0.9306	0.9089	0.9226	0.9674	0.9258	0.8745	0.9342	0.9576	0.8933	0.9164	0.9389	0.87
SLC6A9	2538	AT	17			0	1	0.3289	0.0451	0.1457	0.183	0.0739	0.1524	0.0538	0.0575	0.1097	0.0728	0.0495	0.0871	0.1488	0.138	0.1014	0.2448	0.1115	0.1472	0.0852	0.1364	0.1826	0.1342	0.0752	0.0525	0.1288	0.0712	0.1115	0.0556	0.0976	0.0729	0.0694	0.0911	0.0774	0.0326	0.0742	0.1255	0.0658	0.0424	0.1067	0.0836	0.0611	0.13
SLC6A9	2539	RI	14.3	14.2	14.4	0	0.9302	0.0968	0.0188	0		0.0294	0.0312	0	0	0	0.0294		0.04	0.0169	0	0.0588	0.0182	0	0.0189		0	0.0118	0	0.0092		0	0	0	0	0.0588		0.0339	0	0			0.0189	0	0.0178	0.027	0		0
SLC6A9	2540	AA	14.1	13	14.2	0	0.9319	0.23	0.0353	0.9451		0.9491	1	0.971	1	1	0.9009		1	0.9348	0.9583	0.9348	1	0.8959	0.9684		0.9348	0.9773	0.8614	0.9553		1	0.9751	1	1	1	0.8844	0.9036	0.9132	1	1	1	0.9693	1	0.9874	1	0.8701
SLC6A9	2542	ES	06:07:00	2	8	0	0.9791	0.1655	0.026	1	1	1	0.9782	1	1	1	1		0.9399	1	1	0.9372	0.9654	1	0.9524	1	1	1	1	1		1	1	1	1	1	1	0.9793	1	1	1	1	0.9757	1	1	1	1		1
SLC6A9	2544	ES	6	2	7	0	0.9703	0.3361	0.0357	1	1	1	1	0.9461	1	1	0.9664		1	1	0.9462	1	0.9629	1	1	1	1	1	1	1		1	0.9139	1	0.9176	1	1	0.9554	0.8778	1		1	0.9548	1	0.9696	1	1		1
DMAP1	2545	RI	1.2:1.3	1.1	1.4	0	0.9843	0.6484	0.1204	0.7111	1	0.5748	0.9054	0.8701	0.8136	1	0.9453	0.607	0.7092	0.413	0.8031	0.8068	0.7959	0.6785	0.6944	0.9	0.5436	0.8346	0.7599	0.9351	1	0.6121	0.7905	0.7108	0.9133	0.8291	0.7191	0.7596	1	0.658	1	0.7242	0.8108		0.74	0.8799	0.9482	0.741	0.8403
DMAP1	2546	AA	1.3	1.1	1.4	0	0.9703	0.4624	0.0687	0.8037	1	0.8057	0.9136	0.9271	0.8731		0.9361	0.7009	0.8842	0.789	0.8248	0.8816	0.9026	0.7952	0.8628	0.9543	0.8543	0.8627	0.7094	0.9635	1	0.6175	0.8462	0.8681	0.9366	0.8604	0.7339	0.8492		0.8189		0.7947	0.9301	1	0.8844	0.8118	0.8705	0.8967	0.8644
DMAP1	2547	RI	1.2	1.1	1.3	0	0.9843	0.9181	0.1244	0.3819	0.3955	0.2587	0.4775	0.3955	0.3955	1	0.5471	0.4165	0.2567	0.1641	0.4997	0.3706	0.312	0.3567	0.2614	0.2984	0.1676	0.4512	0.5732	0.3955	0.2996	0.5377	0.4537	0.2871	0.4607	0.4637	0.5668	0.3528	0.696	0.3037	0.4366	0.4246	0.2465	0.0819	0.2762	0.6529	0.7506	0.2646	0.4771
ERI3	2548	AP	1			0	1	1	0.087	0.9876	0.9801	0.9574	0.9906	0.9894	0.976	0.8133	0.9937	0.9602	0.9651	0.9649	0.9842	0.9184	0.9836	0.9717	1	1	0.9694	0.9922	1	0.9109	1	0.9388	1	1	0.9487	1	1	0.9617	1	0.9751	0.9193	0.9843	0.9108	1	0.972	0.9812	0.9905	1	1
ERI3	2549	AP	2.1			0	1	0	0	0	0	0	0	0	0	0	0	0	0	0	0	0	0	0	0	0	0	0	0	0	0	0	0	0	0	0	0	0	0	0	0	0	0	0	0	0	0	0	0
ERI3	2550	AP	4			0	1	1	0.087	0.0124	0.0199	0.0426	0.0094	0.0106	0.024	0.1867	0.0063	0.0398	0.0349	0.0351	0.0158	0.0816	0.0164	0.0283	0	0	0.0306	0.0078	0	0.0891	0	0.0612	0	0	0.0513	0	0	0.0383	0	0.0249	0.0807	0.0157	0.0892	0	0.028	0.0188	0.0095	0	0
ERI3	2552	ES	3	2.2	5	0	1	0.1966	0.0225	0.9725	0.9648	0.9629	0.988	1	0.9268	1	0.9715	0.9845	0.956	1	0.9762	0.952	0.9696	0.9562	0.97	1	0.9655	0.9464	0.9855	0.9599	0.9206	0.9913	0.9697	0.9844	0.9581	0.955	0.9079	0.9073	0.9809	0.917	0.9039	0.9089	0.9475	0.9468	0.9681	0.9762	0.9783	0.941	0.9693
RNF220	2553	AP	3			0	0.9948	0.7257	0.0449	0	0	0	0	0	0	0	0	0	0	0	0	0	0.0118	0.0111	0	0	0	0	0	0	0	0	0	0	0.0755	0	0	0	0	0	0	0	0.0175	0.0266	0.0314	0	0	0	0
RNF220	2554	AP	1.1			0	0.9948	0.3645	0.0409	0	0.0135	0.0071	0.0182	0	0	0	0	0.1125	0.0456	0.0274	0	0.0569	0.0136	0.017	0.0618	0	0.007	0.0029	0.0081	0.0096	0	0	0.0097	0	0.0288	0.0236	0.1051	0	0.0397	0	0	0	0.0201	0.132	0.004	0	0.082	0	0
RNF220	2555	AP	7			0	0.9948	0.8581	0.0696	1	0.9865	0.9929	0.9818	1	1	1	1	0.8875	0.9544	0.9726	1	0.9431	0.9746	0.9719	0.9382	1	0.993	0.9971	0.9919	0.9904	1	1	0.9903	1	0.8957	0.9764	0.8949	1	0.9603	1	1	1	0.9624	0.8414	0.9647	1	0.918	1	1
RNF220	2557	AT	10.2			0	1	0.315	0.0452	0.1482	0.1444	0.1519	0.1165	0.15	0.127	0.1933	0.161	0.1411	0.0787	0.1917	0.1389	0.1948	0.1158	0.2165	0.0893	0.1321	0.2088	0.1083	0.0737	0.0892	0.104	0.1184	0.1494	0.148	0.1884	0.1569	0.1065	0.1348	0.121	0.1899	0.1006	0.1709	0.2257	0.1299	0.17	0.0937	0.0435	0.0891	0.095
RNF220	2558	AT	17			0	1	0.315	0.0452	0.8518	0.8556	0.8481	0.8835	0.85	0.873	0.8067	0.839	0.8589	0.9213	0.8083	0.8611	0.8052	0.8842	0.7835	0.9107	0.8679	0.7912	0.8917	0.9263	0.9108	0.896	0.8816	0.8506	0.852	0.8116	0.8431	0.8935	0.8652	0.879	0.8101	0.8994	0.8291	0.7743	0.8701	0.83	0.9063	0.9565	0.9109	0.905
RNF220	2559	AD	9.2	9.1	10.1	0	0.9983	0.5165	0.077	0.4908	0.657	0.467	0.466	0.5689	0.5872	0.3896	0.5248	0.6473	0.6154	0.5169	0.6402	0.602	0.594	0.6373	0.5227	0.4337	0.5059	0.4389	0.3295	0.651	0.8201	0.5682	0.5843	0.6088	0.6011	0.5516	0.6327	0.5162	0.6319	0.5889	0.6467	0.4263	0.4857	0.4545	0.6488	0.4997	0.5526	0.5392	0.5257
TMEM53	2561	AT	5			0	1	0.4613	0.0793	0.3609	0.351	0.3582	0.3815	0.337	0.3977	0.3827	0.3707	0.306	0.2958	0.3437	0.5829	0.4722	0.3551	0.6248	0.2906	0.2397	0.4456	0.4794	0.3772	0.5738	0.2942	0.5058	0.3686	0.3532	0.4264	0.3218	0.4289	0.3404	0.394	0.5699	0.25	0.4519	0.5241	0.3108	0.5343	0.3382	0.2736	0.2806	0.3975
TMEM53	2562	AT	3.3			0	1	0.4613	0.0793	0.6391	0.649	0.6418	0.6185	0.663	0.6022	0.6173	0.6293	0.694	0.7042	0.6563	0.4171	0.5278	0.6449	0.3752	0.7094	0.7603	0.5544	0.5206	0.6228	0.4262	0.7058	0.4942	0.6314	0.6468	0.5736	0.6782	0.5711	0.6596	0.606	0.4301	0.75	0.5481	0.4759	0.6892	0.4657	0.6618	0.7264	0.7194	0.6025
TMEM53	2563	AA	3.1	2	3.2	0	0.9948	0.4951	0.0755	0.8467	0.896	0.8412	0.8236	0.818	0.6598	0.6496	0.836	0.7219	0.7181	0.8154	0.8333	0.8969	0.9182	0.8051	0.8908	0.9132	0.8526	0.826	0.7785	0.7876	0.751	0.7704	0.8529	0.9088	0.7667	0.977	0.9551	0.8738	0.7219	0.7443	0.7778	0.8747	0.7988	0.7663	0.913	0.6678	0.7398	0.8622	0.793
TMEM53	2568	ES	2	1	4	0	0.8482	0.6944	0.1206	1	1		1		0.5607		1		1	1	0.8637	1	0.7752	0.8748	1		0.8435	0.8692	0.8755	0.9368		0.7979	1	0.8701	1	0.7885		1		0.8762		0.9562	0.7723	0.823	0.8266	0.9133	1	1	0.4405
KIF2C	2573	AP	3.1			0	0.8255	0.2765	0.0265	0	0	0	0	0	0	0	0		0	0	0	0	0	0	0		0	0.0147	0	0		0	0	0	0	0		0	0	0	0	0	0	0	0	0	0	0	0
KIF2C	2574	AP	1			0	0.8255	0.2765	0.0265	1	1	1	1	1	1	1	1		1	1	1	1	1	1	1		1	0.9853	1	1		1	1	1	1	1		1	1	1	1	1	1	1	1	1	1	1	1
KIF2C	2575	ES	7	6	8	0	0.8901	0.3954	0.0496	0.8391	0.9718	1	1	1	0.9649	1	0.9494		0.9908	1	0.9723	1	1	0.9837	0.8335		1	0.9739	0.8736	0.976		0.9722	1	1	0.8507	0.9575	1	0.9849	1	1	1	0.9632	0.9326	0.7896	1	0.8969	0.9024	0.9633	0.9538
RPS8	2577	AD	3.2	3.1	4	0	1	0.0152	0.0018	0.9948	0.9973	0.9916	0.9945	0.9972	0.9919	0.9937	0.9962	0.9939	0.9927	0.9956	0.994	0.994	0.9929	0.9947	0.9953	0.9941	0.9956	0.9951	0.9961	0.9925	0.9967	0.9919	0.9951	0.9926	0.9947	0.9929	0.9955	0.9966	0.9906	0.9924	0.9933	0.9933	0.9923	0.9949	0.9936	0.9911	0.9919	0.9902	0.995
PLK3	2578	ES	13	12	14	1	0.8778	0.4348	0.063	0.8981	0.8828	0.9004	0.8488		0.8606	0.8596	0.8881	0.8562	0.8964	0.8147	0.8189		0.8747	0.8459	0.845		0.8977	0.7697	0.8855	0.7351			0.7649	0.9156	0.8695	0.8289		0.8555	0.8259	0.8973	0.6207	0.7542	0.906	0.7014	0.8688	0.6646	0.8091	0.8186	0.8688
BTBD19	2581	AT	7.2			0	0.9442	0.5593	0.0508	0.147	0	0	0	0	0	0	0		0	0.1827	0	0	0	0	0	0	0	0	0	0		0	0	0	0	0	0	0	0	0	0		0	0	0	0	0	0	0
BTBD19	2582	AT	9			0	0.9442	0.5593	0.0508	0.853	1	1	1	1	1	1	1		1	0.8173	1	1	1	1	1	1	1	1	1	1		1	1	1	1	1	1	1	1	1	1		1	1	1	1	1	1	1
PTCH2	2586	AT	22.2			0	0.9442	0.9992	0.1587	1	0.8481	0.9608	0.9302	0.7604	0.7773	0.9811	0.982	0.903	0.8988	1	0.9103	1	0.9246	1	0.9467	0.9103	1	0.9736	0.881	1	0.9544	1	0.9167	1	0.9211	1	0.7719	0.9455	0.9103	0.4583	0.9195		0.8462	0.9467	1		0.5593	0.5969	0.927
PTCH2	2587	AT	23			0	0.9442	0.9992	0.1587	0	0.1519	0.0392	0.0698	0.2396	0.2227	0.0189	0.018	0.097	0.1012	0	0.0897	0	0.0754	0	0.0533	0.0897	0	0.0264	0.119	0	0.0456	0	0.0833	0	0.0789	0	0.2281	0.0545	0.0897	0.5417	0.0805		0.1538	0.0533	0		0.4407	0.4031	0.073
EIF2B3	2588	AT	10.2			0	1	0.8353	0.085	0.1487	0.1857	0.2093	0.2138	0.1491	0.2726	0.2279	0.0963	0.09	0.2814	0.2314	0.233	0.2404	0.1445	0.2535	0.167	0.1844	0.2654	0.127	0.1147	0.3197	0.1764	0.2502	0.0977	0.2193	0.2189	0.2107	0.1695	0.0969	0.163	0.2815	0.3065	0.2034	0.146	0.2877	0.2284	0.1547	0.2103	0.1558	0.1171
EIF2B3	2589	AT	12			0	1	0.8353	0.085	0.8513	0.8143	0.7907	0.7862	0.8509	0.7274	0.7721	0.9037	0.91	0.7186	0.7686	0.767	0.7596	0.8555	0.7465	0.833	0.8156	0.7346	0.873	0.8853	0.6803	0.8236	0.7498	0.9023	0.7807	0.7811	0.7893	0.8305	0.9031	0.837	0.7185	0.6935	0.7966	0.854	0.7123	0.7716	0.8453	0.7897	0.8442	0.8829
HECTD3	2592	RI	8.2	8.1	8.3	0	0.993	0.4215	0.0563	0.0901	0.094	0.1203	0.0572	0.0305	0.0702	0.0476	0.0657	0.0608	0.1541	0.0843	0.0804	0.1822	0.0463	0.0077	0.0726	0.117	0.0182	0.0283	0.0503	0.0463	0.0958	0.0314	0.0697	0.1078	0.1078	0.0478	0.1521	0.0859	0.2256	0	0.3719	0.0689	0.0084	0	0.0572	0.0482	0.0137	0	0.0321
MUTYH	2593	AP	3			0	0.9843	0.6637	0.1222	0.0999	0.3717	0.2808	0.0859	0.1717	0.15	0.4383	0.2423	0.5099	0.3891	0.2788	0.2981	0.2088	0.1734	0.2002	0.099	0.2602	0.2416	0.026	0.1949	0.3759	0.2126	0.2221	0.2504	0.1414	0.2183	0.1094	0	0	0	0.4447	0.159	0.4061	0.2354	0.2332	0.3381	0.3657	0.2102	0.204	0.0582
MUTYH	2594	AP	2			0	0.9843	0.4402	0.0689	0.2585	0.1259	0.1816	0.3334	0.074	0.2587	0.054	0.2872	0.2747	0.1509	0.2232	0.1193	0.18	0.2335	0.2588	0.199	0.1683	0.1735	0.2801	0.252	0.2431	0.3207	0.1276	0.259	0.1422	0.2039	0.1886	0.3236	0.3895	0	0.1046	0.1379	0.1006	0.2875	0.1759	0.1561	0.1576	0.2039	0.1758	0.1755
MUTYH	2595	AP	1.1			0	0.9843	0.7847	0.1203	0.6416	0.5024	0.5376	0.5807	0.7542	0.5913	0.5077	0.4706	0.2153	0.46	0.4979	0.5826	0.6113	0.5931	0.541	0.702	0.5715	0.5849	0.6939	0.5531	0.381	0.4668	0.6503	0.4906	0.7164	0.5778	0.7021	0.6764	0.6105	1	0.4507	0.7031	0.4933	0.4771	0.5909	0.5058	0.4766	0.5859	0.6202	0.7663
MUTYH	2600	ES	11:12:13:14:15	10	16	0	0.993	0.0742	0.012	1	1	1	1	1	1	1	1	1	1	0.9775	0.9903	0.9845	1	1	1	0.9441	0.9818	1	1	1	1	1	1	1	1	1	1	1	1	0.9772	1	0.9776	0.9799	1	1	1	1	1	1
MUTYH	2601	ES	08:09:00	7	10	0	0.9948	0.0958	0.0128	1	1	1	0.9661	1	1	1	1	1	0.9631	1	0.9767	1	1	0.9782	1	1	1	0.9818	1	1	1	1	0.9583	1	1	1	1	1	1	1	1	1	1	1	1	1	0.9711	1	1
MUTYH	2603	ES	8	7	9	0	0.993	0.1434	0.0211	0.9676	0.9643	0.9645	1	1	1	1	1	1	0.9607	1	0.988	1	0.9747	0.989	1	1	1	1	1	1	0.8716	1	1	1	1	0.9228	1	0.9631	1	1	1	0.9695	1	1	1	0.9339	1	1	1
MUTYH	2609	ES	6.4:6.5	5	7	0	0.9895	0.351	0.0313	1	1	1	0.9469	1	0.8001	1	1	1	1	1	0.9831	1	0.9674	0.9634	1	1	0.9277	1	1	1	1	1	1	1	1	0.9389	0.8688	1	1	1	1	0.9521	0.9316	1	0.9708	1	1	1	1
MUTYH	2612	ES	6.2:6.3:6.4:6.5:7:8:9:10:11:12:13:14:15:16:17:18	5	19	0	0.8429	0.6681	0.0806		1	1	1	1	1	1	0.94	1	1		1	0.7569	1	1	1	1		1	1	1	1	0.6974	1		1	1		1	1	0.5979	1	1		1	1		1	1	1
MUTYH	2613	ES	6.3:6.4:6.5:7:8:9:10:11:12:13:14:15:16:17:18	5	19	0	0.8709	0.4354	0.0604	1	1	1	1	1	1	1			1	1	1	0.9142	1	1	1		1	1	1	1		0.8729	1	1	1	1			1	0.8074	1	1	1	1	1	0.8439		1	1
MUTYH	2614	ES	6.4:6.5:7:8:9:10:11:12:13:14:15:16:17:18	5	19	0	0.9878	0.1232	0.0163	1	1	1	1	1	1	1	0.9514	1	1	1	1	0.9616	1	1	1	1	1	1	1	1	1	0.9664	1	1	1	1	1	1	1	0.9722	1	1	1	1	1	0.9571	1	1	1
MUTYH	2615	ES	6.5:7:8:9:10:11:12:13:14:15:16:17:18	5	19	0	0.7888	0.4108	0.0683	1	1	1	1		1	1	0.8824		1	1	1	0.9535	1	1	1		1	1	1	1	1		1		1	1	1	1	1	0.8687	1	1	1		1	0.8435	1	1
MUTYH	2651	ES	6.3:6.4:6.5:7:8:9	5	10	0	0.8255	0.6329	0.0921		1	1	1	1	1	1			1	1	1	1	1	1	1		1	1	0.9314	0.6119		1				1				1	1	0.664	0.8815	1	1	1			1
MUTYH	2652	ES	6.4:6.5:7:8:9	5	10	0	0.9913	0.3342	0.0281	1	1	1	1	1	1	1	1	1	1	1	1	1	1	1	1	1	1	1	0.9658	0.9551	1	1	1	1	1	1	1	1	1	1	1	0.9575	0.9667	1	1	1	1	1	1
MUTYH	2671	AA	6.4	5	6.5	0	0.9372	0.6085	0.1065	0.9068	0.9187	0.8685	0.7874		0.5587	0.8543	0.7641		0.8935	0.8542	0.8988	0.582	0.9198	0.8722	0.7916	1	0.9455	0.821	0.885	0.8629	0.8228	1	0.8136	1	0.9522	0.9041	0.8224	0.7805	0.6882	0.8471		0.8671	0.9017	1	0.8777	0.8238	0.953	0.7139	1
MUTYH	2673	AA	6.2:6.3	5	6.4	0	0.7941	0.6857	0.1203	0	0.1246	0.3774	0.2232			0.255			0.1951		0.1103	0.1208	0.1759	0.1409	0.2979		0	0.1572	0.1726	0.187	0.1081	0.0833	0.1153	0	0.1997	0.2318		0.0435		0.0435		0.1174	0	0.2443	0.2484	0	0.0237	0.0748	0.5217
MUTYH	2674	AA	6.3	5	6.4	0	0.7923	0.5919	0.1104	0.0538	0.2165	0.2872	0.1769		0.5473	0.0538			0.1388		0.0676	0.3006	0.2165	0.2072	0.1947		0.2087	0.3559	0.3259	0.0692	0	0.1947	0.0882	0.0606	0.0606	0.1621		0		0.1078		0.0809	0.205	0.1769	0.3053	0.1947	0	0.097
TOE1	2677	ES	4	3	5	0	0.9895	0.1546	0.0182	1	1	1	1	1	1	0.958	1	1	1	1	1	1	1	1	1	1	1	1	1	1	1	1	1	1	1	1		1	1	1	1	1	1	1	1	1	1	0.8454	1
TOE1	2678	ES	2	1	3	0	0.9965	0.1096	0.0119	1	1	1	1	1	1	1	1	1	1	1	1	1	1	1	1	1	1	1	1	1	1	1	1	1	1	1	1	1	1	1	1	1	1	1	1	1	1	1	1
TESK2	2681	AT	5			0	1	0.4365	0.0485	0.0678	0	0.0403	0	0.0873	0.1044	0	0.1812	0	0	0	0	0.0235	0	0.0418	0.0493	0.133	0	0.0359	0.0565	0.2682	0	0	0	0	0.0398	0	0	0	0	0.0506	0	0	0.0809	0	0	0	0	0.0567	0.0547
TESK2	2682	AT	13			0	1	0.4365	0.0485	0.9322	1	0.9597	1	0.9127	0.8957	1	0.8188	1	1	1	1	0.9765	1	0.9582	0.9507	0.867	1	0.9641	0.9435	0.7318	1	1	1	1	0.9602	1	1	1	1	0.9494	1	1	0.9191	1	1	1	1	0.9433	0.9453
TESK2	2683	ES	11	10	12	0	0.8586	0.2212	0.0217	1	1	1	1		1	1	1		1		1	1	1	1	1			1	1	1				1	1	1		1		1		1	0.922	1	1	1		1	1
TESK2	2684	ES	2	1	3	0	0.9721	0.2727	0.0304	1	1	1	1	1	1	1	1	1	1	1	1	0.9434	1	1	1	1	1	1	1	1		1	1	1	1	1		1	1	1	1	1	1	0.8	1	1	1	1	1
CCDC163P	2685	AT	6			0	1	0.1551	0.0306	0.9308	0.9539	0.9581	0.9593	1	0.98	1	0.9828	1	0.9186	0.9686	0.9745	0.9203	0.9611	0.9752	0.9228	1	0.9507	0.9898	0.9902	0.9189	1	0.9893	1	0.9756	0.9423	0.9543	0.9695	1	1	0.9525	1	0.9346	1	1	1	1	1	0.9751	0.9854
CCDC163P	2686	AT	4.2			0	1	0.1551	0.0306	0.0692	0.0461	0.0419	0.0407	0	0.02	0	0.0172	0	0.0814	0.0314	0.0255	0.0797	0.0389	0.0248	0.0772	0	0.0493	0.0102	0.0098	0.0811	0	0.0107	0	0.0244	0.0577	0.0457	0.0305	0	0	0.0475	0	0.0654	0	0	0	0	0	0.0249	0.0146
PRDX1	2693	ES	2.2:3:4.1	2.1	4.2	0	1	0.0146	0.0023	0.9934	0.9915	0.9932	0.9956	0.9975	0.9965	0.9947	0.9958	0.9977	0.9938	0.9935	0.9957	0.9962	0.9982	0.9908	0.9887	0.9937	0.9911	0.9867	0.9922	0.9957	0.9933	0.9964	0.9936	0.9963	0.993	0.9969	0.9915	0.9948	0.9969	0.9899	0.9902	0.9924	0.9947	0.9908	0.9953	0.9915	0.9967	0.9942	0.9943
PRDX1	2694	AD	1.2	1.1	2.1	0	1	0.037	0.0043	0.0069	0.0169	0.0056	0.0124	0.0054	0.011	0.0178	0.0123	0.0031	0.0271	0.0146	0.0055	0.0055	0.0156	0.0149	0.0075	0.002	0.0104	0.0168	0.0093	0.0079	0.0132	0.0105	0.0034	0.0086	0.0121	0.0059	0.0057	0.0141	0.0015	0.0056	0.0108	0.0085	0.011	0.0017	0.0092	0.0133	0.0096	0.0072	0.017
AKR1A1	2695	AT	5.2			0	1	0.4223	0.0466	0.0545	0.0848	0.0672	0.1079	0.0271	0.092	0.1118	0.0431	0.0323	0.1545	0.1423	0.2068	0.1303	0.1395	0.0653	0.0556	0.0574	0.0681	0.1184	0.0715	0.124	0.0734	0.0927	0.0975	0.0803	0.0932	0.0748	0.1067	0.093	0.119	0.0217	0.0561	0.0539	0.0209	0.0467	0.0242	0.0518	0.0169	0.0247	0.2014
AKR1A1	2696	AT	10			0	1	0.4223	0.0466	0.9455	0.9152	0.9328	0.8921	0.9729	0.908	0.8882	0.9569	0.9677	0.8455	0.8577	0.7932	0.8697	0.8605	0.9347	0.9444	0.9426	0.9319	0.8816	0.9285	0.876	0.9266	0.9073	0.9025	0.9197	0.9068	0.9252	0.8933	0.907	0.881	0.9783	0.9439	0.9461	0.9791	0.9533	0.9758	0.9482	0.9831	0.9753	0.7986
AKR1A1	2697	ES	7	6	8	1	0.925	0.3586	0.0528		0.9312	0.9302	0.9176	0.8794	0.9077	0.9485	0.9412	0.87	0.8008	0.8746	0.8027	0.8995	0.9149	0.9352	0.9512	0.9565	0.9327	0.84	0.9377	0.8187	0.929	0.9169	0.9051	0.9453	0.8606	0.9423	0.8037	0.8441	0.9044	0.906	0.8588	0.6933	0.8839	0.9378	0.9359	0.849	0.9474	0.9626	0.884
AKR1A1	2698	ES	2	1	3	0	1	0.568	0.0736	0.4943	0.3902	0.4227	0.3879	0.5091	0.3097	0.5552	0.3122	0.4846	0.3767	0.4704	0.4547	0.3716	0.4736	0.3532	0.3326	0.1684	0.3645	0.4562	0.3001	0.4334	0.441	0.4086	0.3723	0.3897	0.4532	0.432	0.3758	0.495	0.3395	0.4483	0.3698	0.3709	0.6491	0.4445	0.3793	0.4171	0.3076	0.392	0.3576
NASP	2706	ES	9	8	10	0	1	0.8366	0.1592	0.4439	0.4914	0.4702	0.5539	0.5324	0.7838	0.5176	0.4077	0.4401	0.3813	0.66	0.4938	0.686	0.3915	0.8338	0.4541	0.2638	0.5041	0.8796	0.6493	0.4523	0.7058	0.7354	0.469	0.6023	0.3126	0.354	0.4911	0.4458	0.4543	0.5072	0.4147	0.3832	0.4641	0.2216	0.446	0.5891	0.7393	0.4079	0.3786
NASP	2708	ES	7.2	6	8	0	1	0.0106	0.001	1	1	1	1	1	1	1	1	1	0.9971	1	1	1	1	1	1	1	1	1	0.996	1	1	1	1	1	1	1	1	1	1	1	1	1	0.9977	1	1	1	1	1	1
NASP	2709	AA	7.1	6	7.2	0	1	0.2371	0.0179	0	0	0	0.0066	0	0.0087	0	0	0	0	0	0.0065	0	0.0023	0.0022	0	0	0.0076	0	0	0	0	0	0	0	0	0	0	0	0	0	0	0	0	0	0	0	0	0	0
NASP	2717	ES	00:06:07.200000	3	8	0	0.9791	0.6512	0.0568	1	1	1	1	1	0.8237	1	0.8954		1	0.76	0.9768	0.8611	1	0.9733	1	1	1	1	0.8694	1		1	1	0.9503	1	0.8787	1	1	1	1	1	0.8378	1	1	1	0.9114	1	0.7512	1
NASP	2719	ES	00:06:07.200000	3	8	0	1	0.3692	0.0163	1	1	1	1	1	0.986	1	0.9948	0.9533	1	0.9845	0.9986	0.9944	1	0.998	1	1	1	1	0.9963	1	1	1	1	0.9958	1	0.9956	1	1	1	1	1	0.9881	1	1	1	0.9959	1	0.9905	1
NASP	2729	ES	5:6:7.2:8:9	3	10	0	0.9808	0.8344	0.116	1	0.8749	1	1	1	0.8105	1	1		0.9129	1	0.8531	0.6758	1	0.9045	1	1	1	1	0.664	0.8366		1	0.7909	1	1	1	1	1	1	0.5187	1	1	0.8625	1	0.8423	0.8288	1	0.4906	1
NASP	2731	ES	6:7.2:8:9	3	10	0	1	0.1972	0.017	1	0.985	1	1	1	0.9852	1	1	1	0.9898	1	0.99	0.9838	1	0.9924	1	1	1	1	0.9878	0.9682	1	1	0.9825	1	1	1	1	1	1	0.9196	1	1	0.9887	1	0.98	0.9914	1	0.9717	1
NASP	2742	ES	5:6:7.2:8	3	10	0	0.9773	0.5096	0.0626	1	0.9335	1	1	1	0.6894	1	1		0.9712	1	0.9199	0.6358	1	0.7618	1	1	1	1	0.6806	0.9259		1	0.8957	1	1	1	1	1	1	0.6673	1	1	0.9212	1	0.9251	0.8745	1	0.7208	1
NASP	2744	ES	00:07:02.200000	3	10	0	1	0.0551	0.0063	1	0.9924	1	1	1	0.9713	1	1	1	0.9967	1	0.9948	0.9804	1	0.9775	1	1	1	1	0.9885	0.9864	1	1	0.992	1	1	1	1	1	1	0.9541	1	1	0.9939	1	0.9911	0.994	1	0.9891	1
NASP	2751	ES	04:05:00	3	6	0	0.9983	0.1351	0.0129	0	0.0062	0.009	0.0155	0.0077	0	0.025	0.0197	0	0.0177	0	0	0.04	0	0	0.0149	0.0487	0.0144	0.013	0	0	0	0	0.0115	0.0181	0.0123	0	0.0155	0	0	0	0.0238	0.0064	0	0.0216	0	0.0026	0	0.0244	0
NASP	2752	ES	5	3	6	0	1	0.6338	0.0558	0.0583	0.1187	0.1511	0.0562	0.0501	0.0784	0.4156	0.0523	0	0.1202	0.0555	0.0656	0.0393	0.1324	0.0828	0.1212	0.0955	0.0798	0.0851	0.0297	0.167	0	0.1191	0.0751	0.0886	0.0661	0.0357	0.1231	0.0518	0.1794	0.1083	0.1145	0.0672	0.0814	0.0512	0.1224	0.0478	0.1016	0.0333	0.0945
NASP	2753	ES	4	3	6	0	0.9983	0.3438	0.0253	0	0.004	0.0068	0.021	0.0051	0.0445	0.0291	0	0	0	0.0431	0.0305	0.0337	0.0259	0.0074	0.0097	0	0.01	0.0166	0	0.0058	0	0.022	0.0072	0.0126	0	0.0131	0.0104	0.0155	0.0378	0	0.0258	0.006	0.0084	0.0118	0.0106	0.0023	0.006	0.0082	0.0286
NASP	2754	ES	2	1	3	0	1	0.7519	0.1138	0.4539	0.3738	0.4281	0.5359	0.2734	0.6109	0.4284	0.4662	0.7107	0.3555	0.4475	0.3722	0.4807	0.3191	0.4812	0.3541	0.4896	0.4634	0.3022	0.6014	0.3472	0.6129	0.4416	0.4803	0.4794	0.4466	0.3988	0.4799	0.4391	0.3788	0.8571	0.5887	0.4336	0.266	0.301	0.5059	0.188	0.2642	0.61	0.3698
GPBP1L1	2769	ES	2	1	3	0	0.9913	0.5556	0.079	0.8734	0.6893	0.8275	0.8573	0.7927	0.8527	1	0.7017		0.7112	0.7	0.8966	0.7509	0.79	0.7956	0.7911	0.8715	0.8833	0.8025	0.7533	0.8174		0.7861	0.8819	0.7567	0.7784	0.7988	0.8465	0.7729	0.8724	0.7765	0.4444	0.7887	0.8645	0.8028	0.7813	0.745	0.7486	0.7393	0.7961
IPP	2771	AT	9.2			0	1	0.4049	0.0509	0.9424	0.8734	0.8974	0.8677	0.8364	0.8681	0.9123	0.9332	0.7003	0.8904	0.8465	0.8669	0.9008	0.9014	0.8602	0.9262	0.8323	0.9529	0.8886	0.8902	0.8346	0.664	0.7994	0.7738	0.9008	0.8106	0.8502	0.8358	0.8412	0.9224	0.8417	0.8115	0.8332	0.86	0.9304	0.8383	0.8991	0.8833	0.8485	0.8369
IPP	2772	AT	10			0	1	0.4049	0.0509	0.0576	0.1266	0.1026	0.1323	0.1636	0.1319	0.0877	0.0668	0.2997	0.1096	0.1535	0.1331	0.0992	0.0986	0.1398	0.0738	0.1677	0.0471	0.1114	0.1098	0.1654	0.336	0.2006	0.2262	0.0992	0.1894	0.1498	0.1642	0.1588	0.0776	0.1583	0.1885	0.1668	0.14	0.0696	0.1617	0.1009	0.1167	0.1515	0.1631
MAST2	2773	AA	29.1	28	29.2	0	1	0.0198	0.0017	1	1	1	1	1	1	1	1	1	1	1	1	1	1	1	1	1	1	1	1	1	1	1	1	1	1	1	1	1	1	1	1	1	1	1	1	1	1	1	1
MAST2	2774	RI	25.2	25.1	25.3	0	0.9983	0	0	1	1	1	1	1	1	1	1	1	1	1	1	1	1	1	1	1	1	1	1	1	1	1	1	1	1	1	1	1	1	1	1	1	1	1	1	1	1	1	1
MAST2	2775	ES	10	9	11	0	0.9948	0.1842	0.0187	1	0.9917	1	1	1	0.9759	1	1		0.9704	1	1	1	1	0.9894	1	1	1	0.9862	0.9649	0.9847	1	1	1	1	1	0.9656	1	1	0.9545	1	1	0.871	1	1	1	1	1	1	0.976
PIK3R3	2776	AP	2.1			0	0.9965	0.7108	0.0597	0.0188	0.0639	0.0175	0.02	0.0428	0.0207	0	0		0.2641	0.0167	0	0.0155	0.0062	0.01	0.0171	0	0.0593	0.0319	0.0273	0.0735	0	0	0.0213	0.0209	0	0.0247	0	0.0531	0	0	0	0	0.0233	0.1145	0.0094	0.0176	0	0.17	0
PIK3R3	2777	AP	3.1			0	0.9965	0.7108	0.0614	0.9812	0.9361	0.9825	0.98	0.9572	0.9793	1	1		0.6716	0.9833	0.9928	0.9845	0.9938	0.99	0.9829	1	0.9407	0.9681	0.9727	0.9265	1	1	0.9787	0.9689	0.9435	0.9753	1	0.8433	1	1	1	0.9059	0.9767	0.8855	0.9906	0.9824	1	0.83	1
PIK3R3	2778	AP	1			0	0.9965	0.1035	0.0084	0	0	0	0	0	0	0	0		0.0643	0	0.0072	0	0	0	0	0	0	0	0	0	0	0	0	0.0102	0.0565	0	0	0.1035	0	0	0	0.0941	0	0	0	0	0	0	0
PIK3R3	2779	ES	10	9	11	0	0.993	0.4295	0.034	1	0.9537	1	0.9743	1	1	1	0.9599	1	1	1	1	0.9642	0.9573	1	1	1	0.9316	0.9567	1	1	1	1	1	1	1	1	1	0.7851	1	0.6462	1	1	0.9814	1	0.9719	1	1	1	1
POMGNT1	2781	AP	2			0	0.9965	0.9918	0.1432	0.7578	0.9582	0.5992	0.9225	0.9093	0.8194	0.818	0.9289	0.6452	0.832	0.9542	0.7777	0.9187	0.7454	0.8656	0.6742	0.7925	0.8892	0.9633	0.9017	0.9659	0.7966	0.6935	0.896	0.8511	0.3574	0.6335	0.7346	0.913	0.7745	0.8716	0.5984	0.6233	0.7239	0.6166	0.7225	0.6267	0.5388	0.7047	0.7298
POMGNT1	2782	AP	4			0	0.9965	0.6072	0.0502	0.0426	0.0121	0.0116	0	0	0.0683	0.0168	0	0	0	0.0056	0.0519	0.0091	0.0314	0	0	0	0.0177	0	0.0166	0	0	0	0.0105	0	0	0.0324	0	0.0195	0	0	0	0.0814	0	0	0.0351	0	0	0	0
POMGNT1	2783	AP	1			0	0.9965	0.745	0.1321	0.1996	0.0297	0.3892	0.0775	0.0907	0.1123	0.1652	0.0711	0.3548	0.168	0.0402	0.1705	0.0722	0.2232	0.1344	0.3258	0.2075	0.0931	0.0367	0.0817	0.0341	0.2034	0.3065	0.0935	0.1489	0.6426	0.3341	0.2654	0.0674	0.2255	0.1284	0.4016	0.2953	0.2761	0.3834	0.2424	0.3733	0.4612	0.2953	0.2702
POMGNT1	2784	RI	22.2	22.1	22.3	0	1	0.2086	0.0257	1	0.9799	0.9825	0.9889	0.9381	0.975	0.9886	0.9892	0.9169	0.9897	0.9896	0.9711	0.9831	0.9939	0.8382	1	0.9927	0.9718	0.9468	0.9225	0.9651	1	0.9638	0.9864	0.9941	1	0.985	0.9759	0.9819	0.9876	0.989	1	0.9938	0.995	0.9887	0.9521	0.9933	0.9718	0.9432	0.9901
POMGNT1	2785	AD	21.2	21.1	22.1	0	1	0.0745	0.0061	1	1	1	1	1	1	1	1	1	1	1	1	1	1	1	1	1	1	1	1	1	1	1	1	1	1	1	1	1	1	1	1	1	1	1	1	1	1	1	0.9852
POMGNT1	2786	RI	12.4	12.3	12.5	0	1	0.6259	0.0712	0.054	0.0936	0.0715	0.0823	0.0034	0.1855	0	0.1198	0.0251	0.2801	0.1003	0.0938	0.1218	0.1452	0.0685	0.0335	0.0348	0.0437	0.0951	0.1069	0.1415	0.0353	0.0606	0.0642	0.0832	0.085	0.0723	0.1254	0.1262	0.118	0.039	0.2407	0.0818	0.023	0.0113	0.0317	0.0505	0.0042	0.1174	0.1855
POMGNT1	2787	RI	12.2	12.1	12.3	0	1	0.6976	0.0811	0.0618	0.1046	0.0618	0.0782	0.0752	0.1223	0.0156	0.0714	0.047	0.252	0.0932	0.2526	0.2185	0.1756	0.072	0.0442	0.0594	0.0787	0.1052	0.1352	0.1195	0.167	0.1268	0.1153	0.115	0.1543	0.0729	0.1094	0.1268	0.2177	0.0708	0.3511	0.0663	0.0181	0.0146	0.0487	0.0264	0.0199	0.1505	0.1531
POMGNT1	2788	ES	9	8	10	0	0.9983	0.0924	0.0081	0.9897	0.9724	1	1	1	0.9855	0.968	1	1	0.9821	1	1	0.9924	0.9916	1	1	1	1	1	1	1	1	1	1	1	1	1	1	0.9797	1	1	1	1	1	1	1	1	1	0.9845	1
RAD54L	2789	RI	1.2	1.1	1.3	0	0.8534	0.4037	0.0182	1	1	1	1	1	1	1	1		1	1	1	1	1	1	1		1	1	1	1		1	1	1	1	1		1	1	1	1	1	1	1	1	1	1	1	1
NSUN4	2791	AP	2.1			0	1	0.0768	0.0096	0	0	0	0	0	0	0	0	0	0	0	0	0.0249	0	0	0	0	0.0273	0.0189	0	0	0	0	0	0	0	0	0	0	0	0	0	0	0	0	0	0	0	0	0
NSUN4	2792	AP	1			0	1	0.0768	0.0096	1	1	1	1	1	1	1	1	1	1	1	1	0.9751	1	1	1	1	0.9727	0.9811	1	1	1	1	1	1	1	1	1	1	1	1	1	1	1	1	1	1	1	1	1
NSUN4	2793	ES	4	3	5	0	0.9983	0.2452	0.0424	0.9477	0.9736	0.979	0.9794	0.9726	0.93	1	0.9228	1	0.9809	0.9628	0.9819	0.8492	0.9741	0.9692	1	1	0.9781	0.9569	0.9816	0.9534	1	1	1	0.9228	0.947	1	0.9131	0.9779	0.9354	1	0.9216	0.8095	0.9658	0.9505	0.9798	0.9808	1	0.9654	0.9259
NSUN4	2794	ES	2.2	1	3	0	0.9442	1	0.1525	0.3759	0.3487	0.3693	0.4384	0.2347	0.2229	0.87	0.4652		0.0947	0.152	0.2507	0.3948	0.31	0.11	0.5091	0.1568	0	0.2596	0.266	0.0896		0.0401	0.3693	0.0928	0.4265	0.4009		0.0809	0.0627	0.0137		0.0975	0.1848	0.1824	0.1906	0.0261	0.0912	0.7507	0
MKNK1	2798	AP	2.1			0	0.9686	0.7446	0.1133	0.5175	0.693	0.5225	0.5649	0.64	0.6782	0.9678	0.6503	0.8469	0.6639	0.6246	0.6125	0.5639	0.532	0.4038	0.5788	0.4414	0.4574	0.462	0.538	0.6782		0.6125	0.6679	0.5076	0.5514	0.4778	0.2832	0.7903				0.9265	0.6757	0.6125	0.6417	0.6986	0.5487	0.6125	0.8157
MKNK1	2800	AP	1			0	0.9686	0.7446	0.1133	0.4825	0.307	0.4775	0.4351	0.36	0.3218	0.0322	0.3497	0.1531	0.3361	0.3754	0.3875	0.4361	0.468	0.5962	0.4212	0.5586	0.5426	0.538	0.462	0.3218		0.3875	0.3321	0.4924	0.4486	0.5222	0.7168	0.2097				0.0735	0.3243	0.3875	0.3583	0.3014	0.4513	0.3875	0.1843
MKNK1	2802	AT	9.2			0	1	0.5435	0.0509	0.0612	0.0999	0.06	0.0791	0.0622	0.0484	0.1161	0.0638	0.0262	0.0699	0.1347	0.1327	0.1049	0.0994	0.0497	0.0822	0.0882	0.0872	0.0617	0.0489	0.1312	0.0627	0.0853	0.1183	0.0765	0.0806	0.0634	0.0759	0.033	0.1272	0.0345	0.0255	0.0285	0.0364	0.0234	0.0596	0.0313	0.0306	0.0479	0.1046
MKNK1	2804	AT	7.2			0	1	0.1767	0.0277	0.0221	0.0789	0.0209	0.0211	0.0275	0.0483	0.0313	0.0098	0.1085	0.0114	0.0828	0.036	0.0193	0.0149	0.0484	0.0162	0.0956	0.0451	0.0325	0.03	0.0471	0.0522	0.0116	0.0263	0.0185	0.0526	0.0414	0.0373	0.0789	0	0.0848	0	0.1395	0.0179	0.0518	0.043	0.0289	0.0469	0.0461	0.0498
MKNK1	2806	AT	17			0	1	0.5959	0.0598	0.9167	0.8212	0.9191	0.8998	0.9103	0.9033	0.8526	0.9264	0.8653	0.9187	0.7825	0.8313	0.8758	0.8857	0.902	0.9015	0.8162	0.8677	0.9059	0.9211	0.8218	0.8851	0.9031	0.8554	0.905	0.8668	0.8952	0.8868	0.888	0.8728	0.8807	0.9745	0.8319	0.9458	0.9248	0.8974	0.9398	0.9225	0.906	0.8456
MKNK1	2807	ES	16	15.2	17	0	0.9965	0.6	0.0882	0.7049	0.8696	0.8198	0.7671	0.7188	0.7939	0.5887	0.8352	0.7907	0.7192	0.8889	0.7477	0.8835	0.7955	0.8104	0.7047	0.8085	0.7404	0.8629	0.6369	0.6946	0.85	0.7973	0.6667	0.7544	0.7591	0.6939	0.6053	0.697	0.8235	0.7632	0.8581	0.8509	0.7258	0.5556	0.7644	0.6739	0.7619	0.7857	0.6471
MKNK1	2808	AA	15.1	14	15.2	0	0.9913	0.3302	0.0477	0.0759	0.1327	0.0977	0.0759	0	0.063	0.1252	0.1185	0.0538	0.0969	0.0722	0.1029	0.0926	0.0398	0.0095	0.0782	0.0395	0.0351	0.047	0.0348	0.3302	0.3161	0.0502	0.0866	0.0916	0.1074	0.1905	0.0502	0.0689	0	0.0417	0.0763	0.0763	0	0.0898	0.1172	0	0	0	0.1482
MKNK1	2809	ES	11	10	12	0	1	0.6519	0.075	0.1021	0.2434	0.1174	0.1697	0.1782	0.15	0.0485	0.1329	0.4333	0.144	0.2437	0.1975	0.1834	0.198	0.0956	0.1207	0.1352	0.1961	0.1662	0.1332	0.1148	0.2943	0.1194	0.2743	0.1303	0.2354	0.1317	0.2249	0.1776	0.1793	0.2228	0.3604	0.297	0.0783	0.1221	0.0353	0.1267	0.3179	0.1641	0.3179
MKNK1	2810	ES	9.1	8	10	0	0.9965	0.3771	0.0379	1	1	1	1	0.9722	1	1	1		0.9652	1	1	0.9801	0.9815	1	0.9506	0.9443	0.9843	0.9664	0.98	1	1	0.9617	0.9236	0.9875	1	0.982	1	1	1	0.9032	1	1	0.9797	1	0.9497	0.9698	0.9693	0.926	1
MKNK1	2812	ES	7.1	5	8	0	0.9965	0.1676	0.0206	1	0.98	0.9813	0.9859	0.9454	1	1	0.9488	0.9053	0.9867	0.9518	0.9903	1	0.9705	0.9815	1	0.8964	0.9493	0.9938	0.9839	1	1	1	1	0.9758	0.9182	1	1	0.9612	1	1	1	1	0.9942	0.9666	0.9847	0.9501	0.9775	1	0.976
MKNK1	2813	ES	6	5	7.1	0	0.9965	0.6897	0.0428	0.0294	0	0.0056	0.0194	0	0.0168	0	0.0133	0	0.0223	0.0735	0.0179	0.0088	0	0.0175	0.0069	0	0	0.004	0.0235	0.009	0.0331	0.0372	0.0122	0.0339	0.0279	0	0.0255	0.0102	0	0	0.0431	0	0.0048	0	0.0098	0	0	0	0
MKNK1	2814	ES	4	3	5	0	0.9913	0.7487	0.1127	0.2075	0.1888	0.1938	0.3756	0.1448	0.2369	0.0179	0.2254	0.0907	0.357	0.2619	0.383	0.5724	0.1916	0.2398	0.1835	0.1747	0.2039	0.322	0.1646	0.1697		0.4369	0.3177	0.2326	0.4687	0.3657	0.4369	0.241	0.4822	0.1519		0.1502	0.1148	0.0938	0.2011	0.0624	0.0998	0.3006	0.2369
MKNK1	2815	AD	2.2	2.1	3	0	0.9651	0.8692	0.1292	0.7128	0.2529	0.6328	0.6123	0.8024	0.557	0.4616	0.6606	0.5301	0.5983	0.4385	0.3642	0.4037	0.5893	0.5752	0.6409		0.6929	0.6592	0.5301	0.3872		0.4037	0.7883	0.7303	0.7458	0.7303		0.4037		0.5038		0.5056	0.4875		0.6857	0.5113	0.7529	0.619	0.4653
MOB3C	2816	AP	1			0	0.9983	0.9939	0.1705	0.751	0.7218	0.7898	0.6923	0.8724	0.6991	0.1525	0.7354	0.8886	0.6235	0.7582	0.373	0.3807	0.6261	0.8279	0.7373	0.8344	0.7525	0.8036	0.7021	0.4006	0.5777	0.5155	0.6158	0.5343	0.599	0.6279	0.6168	0.512	0.4111	0.6835	0.3936	0	0.9059	0.9319	0.7236	0.8147	0.9237	0.8201	0.6459
MOB3C	2817	AP	2.1			0	0.9983	0.9939	0.1705	0.249	0.2782	0.2102	0.3077	0.1276	0.3009	0.8475	0.2646	0.1114	0.3765	0.2418	0.627	0.6193	0.3739	0.1721	0.2627	0.1656	0.2475	0.1964	0.2979	0.5994	0.4223	0.4845	0.3842	0.4657	0.401	0.3721	0.3832	0.488	0.5889	0.3165	0.6064	1	0.0941	0.0681	0.2764	0.1853	0.0763	0.1799	0.3541
MOB3C	2818	RI	2.2	2.1	2.3	0	0.9895	0.4772	0.0557	1	1	1	0.8899	1	1	1	1	1	1	1	1	1	1	1	1	1	1	0.8602	0.8642	0.8194	1	1	1	1	1	1	1	1	1	0.5848	1		1	1	1	1	1	1	1
ATPAF1	2819	AP	1			0	0.9965	0.7384	0.0687	1	1	0.9692	0.9835	1	0.8842	1	1	1	1	1	0.9846	0.9365	0.9645	1	1	1	0.9812	0.9844	0.9482	1	0.9347	1	1	1	1	1	1	1	1	1	0.8449	1	1	1	1	1	1	0.9525	0.9582
ATPAF1	2820	AP	2			0	0.9965	0.7384	0.0687	0	0	0.0308	0.0165	0	0.1158	0	0	0	0	0	0.0154	0.0635	0.0355	0	0	0	0.0188	0.0156	0.0518	0	0.0653	0	0	0	0	0	0	0	0	0	0.1551	0	0	0	0	0	0	0.0475	0.0418
ATPAF1	2821	ES	09:10:00	8	11	0	1	0.2116	0.0323	0.9387	0.9338	0.9371	0.9391	0.9439	0.8811	0.9842	0.9873	0.9268	0.9497	0.9271	0.9359	0.8751	0.9606	0.9592	0.9302	0.9817	0.9689	0.9778	0.9417	0.9149	0.9793	0.8229	0.8498	0.9594	0.8953	0.8655	0.9028	0.9666	0.9151	0.8956	0.9248	0.8795	0.9844	0.9444	0.9176	0.9337	0.9741	0.9362	0.9758
ATPAF1	2822	ES	4	3	5	0	0.9372	0.7108	0.0809	0.1232	0.0656	0.0394	0.0266	0.0447	0.1285	0.2823	0	0	0.1332	0.0985	0.0696	0.0135	0.0547	0.0579	0.0339		0.0757	0	0	0.0821	0.0985	0.1858	0.0252	0	0.0484	0	0.0428	0		0	0.0321	0	0.0844	0.0364	0.0219	0.0139	0.0603	0	0.0895
EFCAB14	2823	AT	13			0	1	0.3194	0.0518	0.0985	0.212	0.1293	0.1531	0.1651	0.0993	0.0467	0.1333	0.0936	0.1599	0.1408	0.1795	0.1544	0.1277	0.1662	0.1585	0.0776	0.1991	0.1593	0.1802	0.0799	0.0702	0.1284	0.1099	0.1502	0.1245	0.1274	0.1273	0.0869	0.0822	0.1167	0.1356	0.169	0.0991	0.1438	0.0763	0.2687	0.2295	0.0961	0.1445
EFCAB14	2824	AT	11			0	1	0.3194	0.0518	0.9015	0.788	0.8707	0.8469	0.8349	0.9007	0.9533	0.8667	0.9064	0.8401	0.8592	0.8205	0.8456	0.8723	0.8338	0.8415	0.9224	0.8009	0.8407	0.8198	0.9201	0.9298	0.8716	0.8901	0.8498	0.8755	0.8726	0.8727	0.9131	0.9178	0.8833	0.8644	0.831	0.9009	0.8562	0.9237	0.7313	0.7705	0.9039	0.8555
EFCAB14	2825	ES	7	6	8	0	1	0.7609	0.1196	0.5774	0.7814	0.6233	0.7031	0.6245	0.6572	0.6429	0.6755	0.9263	0.8345	0.7013	0.8021	0.6087	0.8635	0.868	0.6442	0.6646	0.5896	0.8119	0.6194	0.3627	0.5645	0.6675	0.6329	0.7161	0.8377	0.732	0.8217	0.6232	0.7956	0.5032	1	0.4149	0.878	0.4477	0.874	0.6947	0.7049	0.8034	0.6586
CYP4B1	2829	AP	1			0	0.9127	0.5432	0.0369	0.9971	1	0.9946	0.9914	1		0.8346	1	1			1	0.9731	0.9851	0.9948	0.995	0.9906	1	0.9699		1	1	0.9245	0.9949	1	0.9838	0.9675	1		1	1			0.9955	1	0.992	1	1	1	1
CYP4B1	2830	AP	3.1			0	0.9127	0.5432	0.0369	0.0029	0	0.0054	0.0086	0		0.1654	0	0			0	0.0269	0.0149	0.0052	0.005	0.0093	0	0.0301		0	0	0.0755	0.0051	0	0.0162	0.0325	0		0	0			0.0045	0	0.008	0	0	0	0
CYP4B1	2831	AT	9.2			0	0.9878	0.3131	0.0317	0.0041	0	0.0042	0.0084	0	0	0	0.0599	0	0.3131	0	0.0385	0.043	0.0177	0	0.007	0.0072	0	0.0041		0	0.0061	0	0.0033	0	0.0056	0.0215	0.0087	0	0	0	0	0	0	0	0.0061	0.0241	0	0	0.0351
CYP4B1	2832	AT	13			0	0.9878	0.3131	0.0317	0.9959	1	0.9958	0.9916	1	1	1	0.9401	1	0.6869	1	0.9615	0.957	0.9823	1	0.993	0.9928	1	0.9959		1	0.9939	1	0.9967	1	0.9944	0.9785	0.9913	1	1	1	1	1	1	1	0.9939	0.9759	1	1	0.9649
CYP4B1	2836	AA	7.1:7.2	6	7.3	0	0.8813	0.8148	0.0826	0.9965	1	0.9985	1	1		1	1	0.9712		1	0.9864	0.9939	0.9884	0.9938	0.9965	0.9965	1	1			1	1	0.9962	1	0.9943	0.9346	1		0.9199		1		0.9932	0.989	0.9983	0.9131		1	1
CYP4B1	2837	AA	7.2	6	7.3	0	0.7696	0.9786	0.1232	0.9901		0.9959	1	1		1	1	0.8945			0.9696	0.9815	0.9671	0.9821	0.9898	0.9888	1	1			1	1	0.9891	1	0.9801	0.7792	1						0.986	0.9634	0.9954	0.8447		1
CYP4B1	2838	AA	7.1	6	7.2	0	0.8063	0.6328	0.0695	0.7442	0.8376	0.7273	0.7904			0.4362		0.8008			0.6957	0.7556	0.7447	0.747	0.7474	0.766	0.6592	0.7908			0.6727	0.6592	0.7448	0.7946	0.781	0.8033	0.7691						0.6773	0.7755	0.7354	0.6592		0.8212
CYP4B1	2840	ES	3.2	2	5	0	0.8604	0.2321	0.0217	0.9943	1	0.9937	1				1	0.9905			0.9601	0.9932	0.991	0.9936	0.9954	0.9915	1	1			1	1	0.9953	1	0.9967	0.9533	1		1				0.9639	1	0.9866	1		0.9383	1
CYP4B1	2842	ES	00:02:03.200000	1	5	0	0.918	0.0572	0.0035	1	1	1	1	1		1	1	1	1		1	1	1	1	0.9992	1	1	1		1	1	1	0.9994	1	0.9939	1	1		1				1	1	0.9978	1		1	1
CYP4X1	2888	AP	1			0	0.822	1	0.0802	0		0	0		0		0				0	0.0133	0	0	0	0		0		0	0.2878	0	0.1962	0	0.113	0		0	0	0	0		0	0	0.0066			0
CYP4X1	2889	AP	2			0	0.822	1	0.0802	1		1	1		1		1				1	0.9867	1	1	1	1		1		1	0.7122	1	0.8038	1	0.887	1		1	1	1	1		1	1	0.9934			1
PDZK1IP1	2893	AP	2.1			0	0.9651	0.1436	0.0062	0.9991	1	1	1	1	1	1	0.9994	1	1	1	1	1	1	1	1	1	0.9988	1	1		1	1	0.9983	0.9998	1	0.9997	1	0.9992	1	1	1	1	1	1	1	1		1
PDZK1IP1	2894	AP	1			0	0.9651	0.1436	0.0062	0.0009	0	0	0	0	0	0	0.0006	0	0	0	0	0	0	0	0	0	0.0012	0	0		0	0	0.0017	0.0002	0	0.0003	0	0.0008	0	0	0	0	0	0	0	0		0
CMPK1	2905	AT	7			0	1	0.0505	0.0045	0.9988	0.9972	1	1	0.9993	1	1	1	1	0.9985	0.9995	0.9981	1	0.9998	0.9997	0.9994	0.9994	0.9982	0.9996	0.9992	1	1	0.9994	0.9997	0.999	0.9998	1	1	0.9992	1	0.9995	0.9994	0.9992	0.9993	0.9993	0.9997	1	0.9991	0.9995	0.9984
CMPK1	2906	AT	2			0	1	0.0505	0.0045	0.0012	0.0028	0	0	0.0007	0	0	0	0	0.0015	0.0005	0.0019	0	0.0002	0.0003	0.0006	0.0006	0.0018	0.0004	0.0008	0	0	0.0006	0.0003	0.001	0.0002	0	0	0.0008	0	0.0005	0.0006	0.0008	0.0007	0.0007	0.0003	0	0.0009	0.0005	0.0016
CMPK1	2907	ES	5	4	6	0	1	0.0604	0.0067	0.9966	0.9869	0.9954	0.9977	1	0.9929	0.9929	0.9972	1	0.9887	1	0.9969	0.992	0.9928	0.9921	0.9969	0.9958	0.9987	0.997	0.9945	0.9917	0.9746	0.9955	0.9896	0.9973	0.9975	0.9917	0.9945	0.988	1	0.9795	1	0.9959	0.9887	0.9947	0.9945	0.9931	0.9902	0.9878	1
CMPK1	2908	ES	3	1	4	0	1	0.036	0.0037	1	0.9792	1	0.9943	1	0.987	1	1	1	0.9967	0.9974	1	1	0.9965	0.9981	0.9978	1	0.9964	0.9973	1	0.9948	0.9892	0.9848	0.9917	0.9939	1	0.997	1	0.9955	1	1	1	0.9936	0.9973	0.9965	1	1	1	1	1
SPATA6	2916	AP	1			0	0.7941	0.9338	0.1019	0.8925	1	1	0.9238		1					0.9387	0.9594	1	0.9335	0.9335	0.9432		0.9387	1					0.8845	1	0.8444	1		1	1			1	0.9257	1	0.8545	1			0.7615
SPATA6	2917	AP	7			0	0.7941	0.9338	0.1019	0.1075	0	0	0.0762		0					0.0613	0.0406	0	0.0665	0.0665	0.0568		0.0613	0					0.1155	0	0.1556	0		0	0			0	0.0743	0	0.1455	0			0.2385
SPATA6	2920	AD	13.2	13.1	14	0	0.8953	0.8782	0.1277	0.8191	0.7082	0.6801	0.7512	1	0.6996	0.4416	0.8079	0.8534		0.5966	0.6064	0.7653	0.7279	0.7876	0.735	1	0.7444	0.6907	0.8661		0.4925		0.9283	0.8422	0.8027	0.7062	1		0.5509	0.7857		0.9173	0.4765	0.6504	0.8555	0.6777		0.8291	0.7857
SPATA6	2923	ES	4	3	5.2	0	0.7976	0.2281	0.0324	1	1	1	1	1	1	1				1	1	1	0.966	1	1	1	0.9371	0.971					1	1	1	0.7719	1		1			1	0.9651	0.9545	1	1			1
FAF1	2936	AP	9			0	0.8325	0.8891	0.0975	0	0.024	0	0.0539	0	0.0668		0		0.0499	0.1125	0	0	0.0131	0	0	0	0	0	0.0616	0			0	0.0256		0		0					0		0.0362	0	0	0	0.1837
FAF1	2937	AP	7.1			0	0.8325	0.5786	0.059	0	0	0	0.056	0	0		0		0	0.078	0.0284	0	0.0545	0	0	0	0	0	0	0.0928			0	0		0.2144		0					0		0	0	0	0	0
FAF1	2938	AP	1.1			0	0.8325	1	0.1272	1	0.976	1	0.89	1	0.9332		1		0.9501	0.8095	0.9716	1	0.9324	1	1	1	1	1	0.9384	0.9072			1	0.9744		0.7856		1					1		0.9638	1	1	1	0.8163
FAF1	2939	ES	20	19	21	0	1	0.5928	0.05	0	0.003	0	0.0156	0	0.0059	0.0102	0.0245	0	0.0097	0.0146	0.0172	0.0123	0.0098	0	0.0031	0.0066	0	0.0011	0	0.0024	0	0.0021	0.0177	0.0015	0.0075	0.0016	0	0	0.0051	0	0.0057	0.0022	0.0027	0	0.004	0	0	0	0.0385
FAF1	2940	RI	1.2	1.1	1.3	0	0.9651	0.3213	0.0559	1	0.9603	1	1	1	1	1	1		0.9152	0.92	1	1	0.967	0.962	1	1	1	1	1	1		1	1	1	1	0.8637		1	1	1		1	0.9264	0.6787	0.9152	0.9469	1	1	1
CDKN2C	2941	AP	1			0	0.9407	0.4707	0.0619	0	0	0	0	0	0	0	0	0	0	0	0.0341	0	0.0497	0	0	0	0	0	0	0	0	0	0.0724	0	0.041	0		0	0.4062	0	0	0	0	0	0	0		0	0
CDKN2C	2942	AP	3.1			0	0.9407	0.4707	0.0619	1	1	1	1	1	1	1	1	1	1	1	0.9659	1	0.9503	1	1	1	1	1	1	1	1	1	0.9276	1	0.959	1		1	0.5938	1	1	1	1	1	1	1		1	1
TTC39A	2944	AP	1			0	0.9442	0.777	0.1339	0.1504	0.1409	0	0.3241	0.2002	0.3434	0.2166	0.224	0.0849	0.5263	0.2748	0.1648	0.3784	0.1428	0.5118	0.242	0.2786	0.2716	0.5293	0.105	0.2024	0.0348	0.4301	0.1046	0.3336	0.2524	0.342	0.1895	0.3249		0.5892	0.2581	0.0378	0.4654	0.1449	0.3233	0.1348	0	0.2418	0
TTC39A	2946	AP	3			0	0.9442	0.7714	0.1362	0.5413	0.4125	0.3666	0.3674	0.6006	0.1849	0.5535	0.3446	0.2971	0.4737	0.4534	0.206	0.3784	0.2857	0.2047	0.5244	0.2786	0.5433	0.2646	0.3151	0.5398	0.3305	0.2316	0.6625	0.3707	0.3366	0.1466	0.379	0.2999		0.0536	0	0.1512	0.2973	0.2897	0.2108	0.2292	0.1901	0.2418	0.2796
TTC39A	2947	AP	4			0	0.9442	0.7402	0.109	0.1142	0.1147	0.3047	0.1026	0.0317	0.3011	0.0229	0.1473	0.1613	0	0.0522	0.1565	0.0553	0.3256	0.1458	0.166	0.1764	0.0737	0.1616	0.266	0.0641	0.2478	0.0943	0.0828	0.176	0.1998	0.3712	0.2879	0.0475		0.2035	0	0.2873	0.0982	0.0459	0.1735	0.3458	0.5236	0.1531	0.3098
TTC39A	2948	AP	2			0	0.9442	0.7448	0.1186	0.1941	0.332	0.3287	0.186	0.1675	0.1705	0.2071	0.2842	0.4567	0	0.207	0.4728	0.1879	0.2459	0.1377	0.0675	0.2664	0.1113	0.0271	0.3139	0.1936	0.3868	0.2136	0.1501	0.1197	0.2112	0.1402	0.1087	0.3048		0.1537	0.7419	0.4889	0.1391	0.5196	0.2924	0.2902	0.2863	0.2891	0.3677
TTC39A	2949	AP	5			0	0.9442	0.177	0.0178	0	0	0	0.0199	0	0	0	0	0	0	0.0126	0	0	0	0	0	0	0	0.0174	0	0	0	0.0304	0	0	0	0	0.0348	0.023		0	0	0.0348	0	0	0	0	0	0.0741	0.0428
TTC39A	2950	AT	15.5			0	1	0.4938	0.06	0.0739	0.056	0.1076	0.0746	0.0296	0.0673	0.0239	0.0247	0.0202	0.1567	0.078	0.1285	0.0998	0.1476	0.0302	0.0485	0.0655	0.0887	0.0812	0.0677	0.0627	0.0124	0.0391	0.0573	0.044	0.077	0.0776	0.0429	0.0557	0.2407	0.0244	0.0796	0.049	0.0332	0.0246	0.0316	0.0401	0.0259	0.0303	0.227
TTC39A	2951	AT	21			0	1	0.5584	0.0644	0.9209	0.9322	0.8924	0.9089	0.9691	0.9262	0.9761	0.944	0.9761	0.8283	0.9083	0.847	0.8919	0.8413	0.9652	0.937	0.9153	0.8962	0.9074	0.9215	0.9352	0.986	0.9597	0.935	0.9548	0.919	0.9194	0.9453	0.9339	0.7524	0.9756	0.9064	0.949	0.9626	0.9702	0.9665	0.9503	0.9493	0.9697	0.7371
TTC39A	2952	AT	16.2			0	1	0.128	0.0112	0.0052	0.0118	0	0.0165	0.0013	0.0065	0	0.0313	0.0037	0.015	0.0137	0.0245	0.0083	0.0111	0.0046	0.0145	0.0192	0.0151	0.0114	0.0108	0.0021	0.0016	0.0012	0.0077	0.0012	0.004	0.003	0.0118	0.0104	0.0069	0	0.014	0.0021	0.0042	0.0052	0.0019	0.0096	0.0247	0	0.0359
TTC39A	2953	AD	15.4	15.3	16.1	0	0.9459	1	0.0782	0.0052	0.0525	0.013	0.1109	0.0032	0.0319	0.2471	0.1237	0.019	0.0116	0.0516	0.0808	0.0725	0.0216	0.0285	0.0292		0	0.0583	0.0639	0.0293	0.105	0.0253	0.0343	0.1476	0.0158	0	0	0		0.0176	0.1134	0.0192	0.0049	0.0028	0.0382	0.0075	0.0062	0.0019	0.0466
TTC39A	2954	RI	15.2	15.1	15.3	0	0.9668	0.6645	0.0441	0.013	0.0249	0.0059	0.0198	0.0094	0.0088	0.03	0.033	0	0.0242	0.0152	0.0661	0.045	0.0456	0.01	0.008	0	0.0047	0.011	0.0122	0	0.0481	0.0038	0.0391	0.0118	0.0367	0.0258	0.0327	0.0136		0.0254	0.0404	0.0146	0.0167	0	0.0084	0.0176	0.0037	0.03	0.0102
TTC39A	2955	AA	10.1	9	10.2	0	0.9686	0.7323	0.0857	0.2784	0.2331	0.2753	0.2819	0.1971	0.3132	0.14	0.2201	0.3132	0.2278	0.2357	0.3293	0.2067	0.2753	0.192	0.3052	0.1597	0.1543	0.2962	0.2744	0.2331	0.1319	0.4007	0.2802	0.2331	0.2673	0.3017	0.3132	0.1723		0.1492	0.2697	0.3882	0.2331	0.14	0.2613	0.1857	0.1699	0.4438	0.3579
EPS15	2956	AP	1			0	0.9494	0.771	0.0625	1	1	1	1	1	1	1	1		1	0.9767	1	1	0.9854	1	1		1	1	1	1		1	1	1	1	1		1					1	1	1	1	1	1	1
EPS15	2957	AP	13			0	0.9494	0.771	0.0625	0	0	0	0	0	0	0	0		0	0.0233	0	0	0.0146	0	0		0	0	0	0		0	0	0	0	0		0					0	0	0	0	0	0	0
EPS15	2958	ES	16:17:00	15	18	0	1	0.0216	0.0027	1	1	1	1	1	1	1	1	1	1	1	1	1	1	1	1	1	1	1	1	1	1	1	1	1	1	1	1	1	1	1	1	1	1	0.979	1	0.985	1	1	1
OSBPL9	2960	AP	9.1			0	0.993	0.1969	0.0198	0.9617	1	1	0.9885	1	1	1	1	1	1	0.9702	1	1	1	1	0.9935	1	1	1	0.9675	1	1	1	0.9712	0.9839	1	1	1	1	1	1	1	1	1	1	1	1	0.9761	1	0.9782
OSBPL9	2962	AP	1			0	0.993	0.1679	0.0141	0.0383	0	0	0	0	0	0	0	0	0	0.0148	0	0	0	0	0	0	0	0	0	0	0	0	0	0.0161	0	0	0	0	0	0	0	0	0	0	0	0	0	0	0
OSBPL9	2964	AP	8			0	0.993	0.1655	0.0135	0	0	0	0.0115	0	0	0	0	0	0	0.015	0	0	0	0	0.0065	0	0	0	0.0325	0	0	0	0.0288	0	0	0	0	0	0	0	0	0	0	0	0	0	0.0239	0	0.0218
OSBPL9	2968	ME	16|17	15	18	0	0.9983	0.2082	0.0168	0.0104	0.016	0.0116	0.0215	0.0144	0.0041	0.0494	0.0383	0	0.0199	0.0019	0.0369	0.0147	0.029	0.0157	0.0064	0.007	0.0224	0.09	0.0138	0.0211	0.0063	0.0016	0.0251	0.0042	0.022	0.0037	0.0191	0.0163	0.02	0.0068	0	0.0074	0.009	0	0.0119	0.0096	0	0.0079	0.0283
OSBPL9	2969	ES	17	15	18	0	1	0.6726	0.0979	0.9057	0.8216	0.8352	0.8446	0.7539	0.9314	1	0.8903	1	0.9157	0.8821	0.6364	0.9721	0.9572	0.8472	0.914	0.9526	0.9439	0.3934	0.5842	0.9093	0.9568	0.9578	0.8849	0.9183	0.8175	0.8952	0.8972	0.909	0.8739	0.9122	0.4703	0.8457	0.8949	0.9829	0.9617	0.8792	0.7594	0.9468	0.7185
OSBPL9	2971	ES	14	13	15	0	0.9948	0.2511	0.0246	0.0347	0.015	0.0366	0.0176	0.0302	0.0529	0.2511	0.0096	0.1005	0.0624	0.0277	0.0301	0.0857	0.0372	0.0305	0.0335	0	0.017	0.0408	0.049	0.0272	0.1058	0.0363	0.0466	0.0266	0.0372	0.0173	0	0.0209	0.0591	0.0347	0.2027	0.0261	0.0333	0.0118	0.0243	0.108	0.0168	0	0.0773
OSBPL9	2974	ES	11	9.2	12	0	0.9791	0.0775	0.0049	1	1	1	1	1	1		1		1	1	1	1	1	1	0.984	1	1	1	1	1	1	1	1	1	1	1	1	1	1			1	1	1	1	1	1	1	1
OSBPL9	2975	AD	9.2	9.1	11	0	0.9843	0.8779	0.094	0.8311	0.7075	0.7145	0.9137	0.7374	0.8785		0.7985		0.9582	0.9125	0.682	0.8764	0.8322	0.8711	0.7762	0.8013	0.8555	0.8553	0.8335	0.8512	0.9125	0.9603	0.8034	0.8622	0.9125	0.7379	0.8026	0.771	0.6759	0.4932		0.8987	0.7814	0.7145	0.8137	0.9103	0.7629	0.6759	0.8649
OSBPL9	2976	ES	10	7	11	0	0.9337	0.3096	0.0274	0	0.0338	0	0	0	0		0		0.0586	0	0	0	0.0485	0	0		0.0123	0.0149	0	0		0	0	0	0.0248	0		0.0531		0		0	0	0	0	0	0.1072	0	0
OSBPL9	2977	AD	6.2	6.1	7	0	0.9599	0.4057	0.0435	0	0.2234	0.0143	0	0.007	0.0148	0	0	0.4037	0	0.0504	0.0064	0.0124	0.0039	0	0	0	0.0171	0.0045	0	0		0	0	0.0143	0.0185	0		0.1493	0	0		0.103	0	0	0	0	0	0	0.0139
OSBPL9	2979	ES	6.1	5	7	0	0.993	0.5426	0.0883	0.7249	0.8327	0.8712	0.8212	1	0.9386	0.9779	0.907		0.9591	0.8405	0.8682	0.8683	0.8799	0.8189	0.9598	0.7925	0.9759	0.8726	0.7208	0.9571		1	0.849	0.9207	0.8821	0.805	0.8726	0.9217	0.7981	0.8083	0.615	0.7943	0.8053	0.8843	0.7597	0.7249	0.9232	0.8114	0.8405
OSBPL9	2981	ES	5	4	6.1	0	0.986	0.0926	0.0105	1	1	1	1	1	1	1	1		1	1	1	1	1	1	1	1	1	1	1	1		1	1	1	1	1	1	1	1	1		1	1	1	1	1	0.9741	1	1
NRD1	2982	AP	1.1			0	0.9703	0.134	0.0173	1	1	0.9757	1	1	1	1	1		1	1	0.9534	0.9628	1	0.9681	1	1	1	0.9928	1	0.9615		1	0.9424	1	1	1		1	1	1		1	1	1	1	1	1	1	1
NRD1	2983	AP	2			0	0.9703	0.134	0.0173	0	0	0.0243	0	0	0	0	0		0	0	0.0466	0.0372	0	0.0319	0	0	0	0.0072	0	0.0385		0	0.0576	0	0	0		0	0	0		0	0	0	0	0	0	0	0
NRD1	2986	ES	26	25	27	0	1	0.7013	0.0592	0.05	0.0644	0.028	0.0712	0.0335	0.0705	0.1971	0.0459	0.0306	0.0481	0.0873	0.1104	0.1165	0.0677	0.0355	0.0651	0.0578	0.032	0.0342	0.0342	0.053	0.1451	0.1112	0.1412	0.044	0.0698	0.0494	0.1093	0.054	0.0305	0.0434	0.0294	0.0385	0.0057	0.0331	0.018	0.015	0.0051	0.0458	0.102
NRD1	2987	ES	04:05:00	3	6	0	0.9965	0.9296	0.1014	0.1434	0.131	0.1537	0.1896	0.1119	0.2261	0.1376	0.1541		0.2118	0.1708	0.2326	0.1718	0.383	0.1999	0.1449	0.1988	0.1604	0.2163	0.1638	0.2049	0.2793	0.2474	0.2243	0.1448	0.2101	0.2572	0.4065	0.2806	0.4129	0.2601	0.0926	0.2203	0.1207	0.0491	0.1499	0.1227	0.1531	0.3192	0.2583
NRD1	2988	AD	1.2	1.1	3	0	1	0.2034	0.0156	0.9927	0.985	1	0.9876	1	1	1	0.9716	1	0.993	0.9893	0.9912	0.9732	0.9825	0.9913	0.9944	1	0.9919	0.9913	0.977	1	1	0.9592	1	0.9934	0.9885	0.9887	1	0.9919	1	1	1	1	0.9944	0.9633	0.9884	1	1	0.9643	1
TXNDC12	2989	AT	9			0	1	0.0507	0.0085	0.9728	0.9574	0.9766	0.9777	0.9802	0.9796	0.9939	0.9824	0.9934	0.9898	0.9769	0.9808	0.9828	0.9732	0.978	0.9682	0.9755	0.9767	0.9493	0.9839	0.9924	0.9924	0.9903	0.9795	0.9817	0.981	0.9868	0.9912	0.9813	0.9876	0.991	0.9962	0.9931	0.9868	0.9944	0.9906	0.9783	0.9648	0.9845	0.98
TXNDC12	2990	AT	3			0	1	0.0507	0.0085	0.0272	0.0426	0.0234	0.0223	0.0198	0.0204	0.0061	0.0176	0.0066	0.0102	0.0231	0.0192	0.0172	0.0268	0.022	0.0318	0.0245	0.0233	0.0507	0.0161	0.0076	0.0076	0.0097	0.0205	0.0183	0.019	0.0132	0.0088	0.0187	0.0124	0.009	0.0038	0.0069	0.0132	0.0056	0.0094	0.0217	0.0352	0.0155	0.02
TXNDC12	2991	ES	4	2	5	0	1	0.4139	0.0352	0.0051	0.0048	0.0072	0.0037	0	0.0123	0.0153	0.0033	0	0.0016	0.0075	0.0147	0.01	0.0084	0.0015	0.006	0	0.0016	0.0131	0.0049	0.0076	0.0059	0.005	0.0083	0.0103	0.0039	0.0108	0.0104	0.0053	0.0131	0.003	0.0119	0.0016	0.0062	0.0109	0.0056	0.0048	0	0.0038	0.0033
BTF3L4	2992	AT	6.2			0	1	0.2937	0.0303	0.0155	0.0146	0.033	0.0342	0.0309	0.0383	0.0115	0.0272	0.0225	0.0322	0.068	0.0445	0.0453	0.0517	0.0112	0.0067	0.0256	0.0172	0.0188	0.0319	0.0357	0.0786	0.0268	0.0754	0.0211	0.0768	0.0445	0.0491	0.0445	0.0283	0.009	0.0151	0.0213	0.0097	0.0136	0.0225	0.0165	0.0171	0.0077	0.0557
BTF3L4	2993	AT	7			0	1	0.2937	0.0303	0.9845	0.9854	0.967	0.9658	0.9691	0.9617	0.9885	0.9728	0.9775	0.9678	0.932	0.9554	0.9547	0.9483	0.9888	0.9933	0.9744	0.9828	0.9812	0.9681	0.9643	0.9214	0.9732	0.9246	0.9789	0.9232	0.9555	0.9509	0.9555	0.9717	0.991	0.9849	0.9787	0.9903	0.9864	0.9775	0.9835	0.9829	0.9923	0.9443
BTF3L4	2994	ES	5	4	6.1	0	1	0.1896	0.0242	0.9633	0.9583	0.896	0.944	0.9289	0.9294	0.9478	0.9784	0.943	0.9649	0.9398	0.9097	0.9463	0.9563	0.9422	0.9442	0.9701	0.9667	0.9585	0.9418	0.9331	0.9451	0.9448	0.9502	0.928	0.9522	0.9514	0.9622	0.8706	0.9227	0.9447	0.9296	0.9157	0.9304	0.919	0.9499	0.9058	0.8912	0.9513	0.9376
BTF3L4	2995	ES	3	2	4	0	1	0.2645	0.015	0.0077	0.0098	0.0069	0.0133	0	0	0.0166	0.0049	0.0099	0.0045	0.0134	0.0158	0.0025	0.006	0.0042	0	0	0.0048	0.0094	0.02	0.0087	0	0	0.0028	0.0096	0.0015	0.0077	0	0.0069	0.0028	0.001	0.004	0.0041	0.0092	0.0057	0.0058	0.0022	0.0073	0.0026	0.0084
BTF3L4	2997	ES	2	1	4	0	1	0.208	0.028	0.9061	0.9493	0.9218	0.9408	0.9048	0.9361	0.9593	0.9671	0.9825	0.8896	0.8824	0.9278	0.9521	0.973	0.9515	0.918	0.865	0.924	0.954	0.8839	0.9676	0.9468	0.844	0.9065	0.9719	0.9907	0.8891	0.9152	0.9546	0.9797	0.9385	0.9772	0.9726	0.9731	0.8823	0.9611	0.9105	0.9012	0.9736	0.9717
ZFYVE9	3000	ES	6	5	7	0	0.9825	0.1926	0.0344	0.9481	1	0.9665	1	0.9266	1	0.93	1		0.9481	0.9604	0.9448	1	1	1	1	1	1	1	1	0.971	1	1	0.9115	1	1	1	1	1				1	0.9586	1	1	0.8632	1	1	1
CC2D1B	3001	AT	24			0	1	0.3417	0.0506	0.0916	0.0699	0.1241	0.1344	0.1105	0.0944	0.031	0.092	0.102	0.1222	0.0705	0.1377	0.1825	0.2154	0.1298	0.1075	0.0977	0.0745	0.193	0.116	0.1451	0.0891	0.1285	0.0574	0.1079	0.1135	0.1259	0.144	0.1253	0.0469	0.1836	0.0705	0.0516	0	0.023	0.0634	0.0769	0	0.0874	0.1256
CC2D1B	3002	AT	25.3			0	1	0.3417	0.0506	0.9084	0.9301	0.8759	0.8656	0.8895	0.9056	0.969	0.908	0.898	0.8778	0.9295	0.8623	0.8175	0.7846	0.8702	0.8925	0.9023	0.9255	0.807	0.884	0.8549	0.9109	0.8715	0.9426	0.8921	0.8865	0.8741	0.856	0.8747	0.9531	0.8164	0.9295	0.9484	1	0.977	0.9366	0.9231	1	0.9126	0.8744
CC2D1B	3003	RI	25.2	25.1	25.3	0	1	0.7426	0.0937	0.2008	0.1591	0.1771	0.2685	0.1092	0.286	0.0844	0.1724	0.233	0.2713	0.3453	0.3536	0.2936	0.1493	0.1646	0.1335	0.1744	0.129	0.1393	0.2337	0.2839	0.2667	0.279	0.3101	0.2263	0.4832	0.2134	0.2568	0.24	0.2652	0.163	0.2601	0.1899	0.1259	0.1259	0.1319	0.3154	0.025	0.0553	0.3912
CC2D1B	3004	AA	14.1	13	14.2	0	0.9825	0.744	0.0876	0.2006	0.2833	0.1897	0.1906	0.1424	0.1148	0.257	0.201	0.2624	0.2066	0.1402	0.139	0.274	0.3138	0.0776	0.0988	0.3924	0.14	0.1505	0.1529	0.1297	0.3675	0.1394	0.2605	0.3061	0.1822	0.2112	0.3722	0.2135	0.2167	0.348	0.2381		0.1384	0.1813	0.1289	0.1394	0.1466	0.1974	0.2493
ZCCHC11	3007	AT	30			0	1	0	0	1	1	1	1	1	1	1	1	1	1	1	1	1	1	1	1	1	1	1	1	1	1	1	1	1	1	1	1	1	1	1	1	1	1	1	1	1	1	1	1
ZCCHC11	3008	AT	3.2			0	1	0	0	0	0	0	0	0	0	0	0	0	0	0	0	0	0	0	0	0	0	0	0	0	0	0	0	0	0	0	0	0	0	0	0	0	0	0	0	0	0	0	0
ZCCHC11	3010	ES	5	4	6	0	0.9511	0.1291	0.0159	1	1	1	1	1	1		1		1	0.8722	1	1	1	1	1	1	1	0.9879	1	1		1	1	1	1	1		1	1				1	1	1	1	1	1	1
ZYG11B	3011	AT	14.2			0	1	0.0457	0.0052	0	0	0	0	0	0	0	0	0	0	0	0	0.0236	0	0	0	0	0	0	0	0	0	0	0	0	0	0	0	0	0	0	0	0	0	0	0	0	0	0	0
ZYG11B	3012	AT	15			0	1	0.0457	0.0052	1	1	1	1	1	1	1	1	1	1	1	1	0.9764	1	1	1	1	1	1	1	1	1	1	1	1	1	1	1	1	1	1	1	1	1	1	1	1	1	1	1
ZYG11B	3015	ES	09:10:00	8	12	0	0.9634	0.1152	0.008	1	0.9162	1	1	1	1	1	1		1	1	1	1	1	1	1	1	1	1	1	1		1	1	1	1	1	1	1	1	1	1	1	1	1	1	1	1		1
ECHDC2	3019	AT	8.2			0	1	0.278	0.037	0.1149	0.1368	0.1414	0.1515	0.0969	0.1198	0.2925	0.1245	0.1095	0.1486	0.1688	0.1587	0.1821	0.1791	0.1185	0.1285	0.1332	0.1024	0.1888	0.1071	0.147	0.0922	0.1515	0.1372	0.125	0.1552	0.1412	0.1362	0.065	0.1169	0.113	0.0808	0.1651	0.1154	0.0761	0.1116	0.0818	0.0395	0.0482	0.1664
ECHDC2	3020	AT	5.2			0	1	0.35	0.0479	0.129	0.1223	0.1187	0.1341	0.0463	0.0712	0.1463	0.0695	0.0045	0.1796	0.1207	0.1141	0.1357	0.2084	0.0645	0.1432	0.0303	0.1188	0.1012	0.0788	0.093	0.0355	0.079	0.1043	0.1405	0.0995	0.1042	0.0674	0.0485	0.1221	0.0218	0.0526	0.0288	0.0702	0.0322	0.0559	0.0612	0.0404	0.0169	0.1768
ECHDC2	3021	AT	9.2			0	1	0.3445	0.0597	0.2057	0.2079	0.2391	0.2314	0.1546	0.2194	0.1083	0.2448	0.2068	0.2483	0.264	0.2732	0.3299	0.2604	0.1748	0.1812	0.176	0.1895	0.2367	0.1198	0.2563	0.1919	0.3069	0.2458	0.2369	0.2796	0.2825	0.2556	0.1928	0.252	0.1536	0.1909	0.1896	0.1318	0.1031	0.1703	0.1119	0.0918	0.1156	0.2595
ECHDC2	3022	AT	14			0	1	0.7168	0.1256	0.5503	0.533	0.5009	0.4829	0.7022	0.5896	0.4529	0.5613	0.6792	0.4235	0.4465	0.454	0.3523	0.3522	0.6422	0.5471	0.6606	0.5893	0.4733	0.6943	0.5037	0.6804	0.4627	0.5127	0.4976	0.4656	0.4721	0.5408	0.6937	0.509	0.7116	0.6757	0.6165	0.6826	0.7886	0.6622	0.7451	0.8282	0.8193	0.3973
ECHDC2	3023	ES	13	12	14	1	0.9058	0.2919	0.0484	0.9505		0.963	0.9268	0.9084	0.8877	0.9707	0.8987	0.9577	0.8867	0.8922	0.8559	0.9327	0.9634	0.9564	0.9052	0.9049	0.9037	0.8918	0.9325	0.8577	0.9134	0.8764	0.8652	0.8947	0.8998	0.9605	0.9288	0.7934	0.9414	0.8957	0.9299	0.803	0.8606	0.9727	0.8859	0.8955	0.8534	0.9317	0.8494
ECHDC2	3024	ES	9.1	8.1	10	0	0.9791	0.9684	0.1358	0.7869	0.5563	0.6309	0.7209	0.7218	0.7303	0.393	0.6889	0.6599	0.3953	0.5771	0.3917	0.6079	0.6765	0.7378	0.6611	0.574	0.7136	0.5273	0.8313	0.3768	0.7311	0.5331	0.5758	0.729	0.6867	0.6004	0.5789	0.5616	0.6124	0.4387	0.5301	0.2323	0.4031	0.7744	0.6243	0.4054	0.5083	0.6476	0.3789
ECHDC2	3025	AA	6.1	5.1	6.2	0	0.9948	0.7838	0.0999	0.8848	0.8711	0.8553	0.885	0.8334	0.8125	0.7063	0.901	0.7374	0.9759	0.8089	0.9523	0.9341	0.8447	0.8476	0.8159	0.7464	0.7445	0.9062	0.6913	0.8221	0.8311	0.9601	0.8986	0.7372	0.8713	0.8062	0.9282	0.7565	0.5667	0.8228	0.8833	0.887	0.6767	0.8176	0.9306	0.8082	1	0.7909	0.9582
ECHDC2	3026	ME	3|4	2.1	5.1	0	0.8499	0.8179	0.1197	0.3114	0.3425	0.3943	0.2999	0.4386	0.3043	0.8179	0.2809		0.3494	0.2311	0.3372	0.2609	0.3114	0.3846	0.3894	0.4717	0.3555	0.3562	0.2988	0.2109	0.4839	0.2113	0.1592	0.1962	0.3325	0.3297	0.089	0.3086	0.1825				0.2266		0.2489	0.2577			0.1979
ECHDC2	3027	ES	4	2.1	5.1	0	0.9162	1	0.2105	0.8699	0.2604	0.6282	0.6858	0.4131	0.898	0.4842	0.4459	0.3056	0.9185	0.7531	0.8346	0.8844	0.6459	0.4231	0.6106	0.7113	0.3994	0.5469	0.2791	0.7279	0.3697	0.7325	0.8229	0.6525	0.7522	0.5939	0.6525	0.1148	0.8313		0.1327	0.2033	0.273	0.4131	0.5136	0.4751		0.0554	0.5722
ECHDC2	3028	ES	3	2.1	5.1	0	0.7592	0.8871	0.198	0.7516	0.1549	0.5238	0.4832	0.3548	0.7938	0.8083	0.2391		0.8582	0.4783	0.7196	0.7297	0.4521	0.3143	0.5		0.2683	0.4004	0.1416	0.4169		0.4231	0.4681	0.3143	0.602	0.4183		0.0547	0.5238		0.0735	0.0735	0.0991		0.2593	0.2391		0.0438	0.2481
ECHDC2	3030	ES	4:5.1:6.1	2.1	6.2	0	0.9843	1	0.1605	0.3508	0.1435	0.171	0.2685	0.0623	0.2503	0.1384	0.1597	0.0915	0.4828	0.3614	0.6941	0.4551	0.3514	0.2944	0.1338	0.0396	0.0819	0.3773	0.1209	0.4967	0.1272	0.4076	0.2091	0.3201	0.2061	0.2092	0.278	0.0693	0.3138	0.1279	0.3912	0.2249	0.3231	0.075	0.2252	0.259	0.1023	0.0348	0.3409
ECHDC2	3031	ES	3:5.1:6.1	2.1	6.2	0	0.9791	1	0.1365	0.2303	0.0988	0.1424	0.1585	0.0571	0.1512	0.5027	0.0837	0	0.3776	0.1667	0.577	0.259	0.2304	0.2366	0.1058	0.0447	0.0542	0.286	0.0673	0.2302	0.1471	0.177	0.058	0.1231	0.1343	0.1338	0.043	0.0382	0.1105	0.2187		0.0915	0.1396	0	0.1	0.1285	0.0904	0.0323	0.1334
ECHDC2	3032	ES	2.2:5.1:6.1	2.1	6.2	0	0.9372	1	0.1054	0.147	0.0183	0.1004	0.0634	0	0	0.043	0.0851	0.0408	0.1642	0.0466	0.2436	0.0548	0.0458	0.3646	0.0437	0	0.0351	0.1006	0.0661	0.0655	0.0553	0	0.0223	0	0.0195	0.0608	0	0.066	0.032	0.416			0.0762	0.0498	0.1363	0.1646	0	0	0.0651
ECHDC2	3033	ES	5.1:6.1	2.1	6.2	0	0.9721	1	0.164	0.1095	0.4317	0.1598	0.1969	0.1159	0.0543	0.2548	0.2664	0.2898	0.1094	0.2072	0.3905	0.1348	0.3107	0.4505	0.1262	0.0266	0.1564	0.4225	0.3553	0.3247	0.2875	0.2584	0.0806	0.276	0.1112	0.2061	0.2297	0.4553	0.1226	0.5591	0.8433	0.5887	0.6361	0.1486	0.2713	0.3678	0.3809	0.4678	0.3645
ECHDC2	3034	ES	00:04:05.100000	2.1	6.2	0	0.9529	0.8029	0.0865	0.1235	0.0631	0.0615	0.0825	0.0157	0.125	0.0784	0.0549	0.0615	0.0411	0.1867	0.1667	0.0964	0.1528	0.1092	0.0564	0.0423	0.041	0.0936	0.0693	0.2649	0.0532	0.0505	0.0523	0.2467	0.0596	0.092	0.0441	0.0406	0.3748	0.0446		0.061	0.2183	0.0256	0.031	0.1436	0	0.0177	0.0324
ECHDC2	3035	ES	00:03:05.100000	2.1	6.2	0	0.9372	1	0.0724	0.0657	0.037	0.046	0.0405	0.0139	0.0657	0.3238	0.0247	0	0.0244	0.0702	0.1029	0.0394	0.0832	0.0787	0.0404	0.0431	0.0253	0.0604	0.0359	0.093	0.0572	0.0156	0.0116	0.0826	0.0337	0.0525	0.005	0.021	0.1307	0.0754			0.085	0	0.0114	0.0631	0	0.0153	0.0092
ECHDC2	3036	ES	2.2:5.1	2.1	6.2	0	0.9162	0.4151	0.045	0.0388	0.0065	0.0313	0.0149	0	0	0.0208	0.025	0.0245	0.008	0.0181		0.0067	0.0143	0.1364	0.016	0	0.0162	0.0176	0.0352	0.0234	0.0201	0	0.0043	0	0.0045	0.0227	0	0.0368	0.0385	0.1715			0.0451	0.0154	0.0161	0.0825	0	0	0.0042
ECHDC2	3037	ES	5.1	2.1	6.2	0	0.9442	0.8555	0.105	0.0254	0.1898	0.0481	0.0478	0.0289	0.0205	0.1269	0.0837	0.1805	0.0045	0.084	0.0488	0.0165	0.1109	0.1748	0.0452	0.0233	0.0735	0.0994	0.2132	0.134	0.1148	0.0239	0.0149	0.1841	0.0253	0.0803	0.0305	0.3007	0.1353	0.2524		0.2233	0.4945	0.046	0.0351	0.2018	0	0.2763	0.0309
SCP2	3042	RI	16.2	16.1	16.3	0	1	0.2006	0.0169	0.0092	0.0093	0.0087	0.0164	0.0035	0.0175	0.0092	0.014	0.0039	0.0146	0.0309	0.0255	0.0376	0.016	0.01	0.0086	0.0077	0.0063	0.0076	0.011	0.0247	0.0102	0.0162	0.0149	0.013	0.0287	0.0194	0.0178	0.0155	0.0185	0.0069	0.0117	0.0094	0.0034	0.0049	0.0063	0.0051	0.0009	0.003	0.0175
SCP2	3043	ES	15	14.2	16.1	0	1	0.1563	0.0107	0.9755	0.9717	0.989	0.9882	0.9686	0.9895	0.9925	0.9855	0.9884	0.9748	0.9899	0.9715	0.9845	0.9877	0.9808	0.9788	0.9893	0.9859	0.9916	0.9934	0.9702	0.993	0.969	0.9615	0.9822	0.9714	0.9833	0.9876	0.9805	0.971	0.9877	0.969	0.968	0.9817	0.9756	0.9819	0.9617	0.9697	0.9888	0.985
SCP2	3044	AA	14.1	13	14.2	0	1	0.0533	0.0049	0.9969	1	0.9911	0.9955	1	1	1	0.9894	0.9829	1	0.9933	1	0.9977	0.995	0.9916	0.9962	1	0.9914	0.9961	1	0.9893	1	0.9948	0.9974	0.9978	0.9977	0.9932	0.992	0.9895	0.9866	1	1	1	0.9904	0.9966	0.9921	0.9969	1	0.9945	1
SCP2	3045	ES	12	11	13	0	1	0.8004	0.1682	0.4879	0.7636	0.4655	0.5676	0.7868	0.715	0.3439	0.8539	0.7613	0.7424	0.4335	0.6295	0.2123	0.4737	0.6803	0.4076	0.4347	0.636	0.8342	0.7782	0.4994	0.5635	0.3002	0.4587	0.5984	0.532	0.5103	0.7262	0.8171	0.5539	0.671	0.8742	0.93	0.6438	0.3776	0.4498	0.677	0.8744	0.7129	0.7337
SCP2	3046	ES	4	3	5	0	0.9965	0.2128	0.0274	0.9803	0.939	1	0.9918	1	0.9796	1	0.9112	0.902	0.9735	0.9788	0.9853	0.9593	1	0.9445	0.9553	0.9808	0.963	0.993	0.9826	0.9709	1	0.9694	1	0.9828	0.9625	0.9654	1	0.9721	0.8824	1	0.9031	0.8795	0.9708	0.9309	0.9826	0.9873	0.9618	1	1
SCP2	3048	ES	3	2	4	0	0.993	0.1951	0.0093	1	1	1	1	1	1	0.9594	1	1	1	1	1	1	1	1	1	1	1	0.9928	1	1	1	1	1	1	1	1	1	1	1	1	1	1	1	1	1	1	1	1	1
SCP2	3050	ES	2	1	3	0	0.9913	0.0732	0.0065	1	0.9828	1	1	1	1	1	1	1	1	1	1	1	1	1	1	1	1	1	1	1	1	1	1	1	1	1	1	0.9421	1	1	1	1	1	1	1	1	1	1	1
PODN	3051	ES	5:6:7:8	4	9	0	0.9965	0.1442	0.0185	0.9855	1	0.991	0.9827	0.9436	0.9763	0.9541	0.9868	1	1	0.9773	0.9528	0.9938	0.9796	1	0.9967	1	1	1	1	1	1	1	0.9867	1	1	1	1	1	1	1		1	0.9767	1	0.9623	0.9358	1	1	0.9798
SLC1A7	3053	AT	12			0	0.9878	0.3333	0.033	0.9956	0.9959	0.9967	1	0.9724	0.9945	0.9929	0.9946	1	1	0.9933	1	0.9808	0.9928	0.9865	0.9949	1	1	1	1	1	1	0.9992	0.941	0.9981	1	1	1	1	0.8996	1		0.7071	1	0.998	0.9981	1		1	0.9764
SLC1A7	3054	AT	4			0	0.9878	0.3333	0.033	0.0044	0.0041	0.0033	0	0.0276	0.0055	0.0071	0.0054	0	0	0.0067	0	0.0192	0.0072	0.0135	0.0051	0	0	0	0	0	0	0.0008	0.059	0.0019	0	0	0	0	0.1003	0		0.2929	0	0.002	0.0019	0		0	0.0236
MAGOH	3055	ES	3	2	4	0	1	0.4703	0.039	0.8728	0.8955	0.8959	0.8758	0.8649	0.9061	0.9516	0.9015	0.9129	0.9164	0.9491	0.847	0.9204	0.9111	0.9127	0.8763	0.8557	0.9522	0.9136	0.9049	0.8494	0.952	0.8792	0.8936	0.891	0.8853	0.9257	0.8337	0.8658	0.9028	0.8461	0.832	0.6492	0.8947	0.894	0.9019	0.849	0.84	0.8846	0.9114
LRP8	3058	ES	20	19	21	0	0.9459	0.911	0.1789	0.6078	0.6194	0.6029	0.6057	0.532	0.7493		0.4409		0.7384	0.5208	0.4773	0.2624	0.5238	0.8476	0.6318	0.4696	0.4432	0.5705	0.6731	0.2652	0.1661	0.426	0.347	0.5152	0.3015	0.5254	0.3815	0.4963	0.6867	0.1049	0.4027	0.4472	0.5303	0.7215	0.6777	0.5152	0.4121	1	0.5705
LRP8	3059	ES	17	16	18	0	0.9756	0.3722	0.0636	0.815	0.9494	0.9219	0.9267	0.8826	1	1	0.951	0.6783	0.9547	0.9413	0.978	0.9643	1	0.9643	0.9607	1	0.9484	1	0.9154	0.975	0.7638	1	0.7877	0.9712	0.9553	1	0.7951	0.9778	1	1	0.7742	1	0.8506	0.9	1	1	1	1	1
LRP8	3060	ES	10	9	11	0	0.897	0.4477	0.049	0.9226	0.9778	1	1	0.9745	1	0.9569	1		1	1	0.97	1	0.9774	1	1	1	0.9915	0.908	1	1		1	1	0.9536	0.9145	1	1	1	0.9367			1	1	1	1	1	1		1
NDC1	3067	ES	13.2:14	13.1	15	0	0.9983	0.1452	0.0112	1	1	1	1	1	1	1	1	1	0.9695	0.9723	0.9892	1	1	1	1	1	1	1	1	1	1	1	1	1	1	0.9565	1	0.9835	1	1	1	1	1	1	1	1	1	1	1
NDC1	3068	ES	8	7	9	0	0.993	0.1129	0.0101	1	0.9864	1	1	1	1	1	1		1	1	1	1	1	1	1	1	1	1	1	1	1	1	1	1	1	1	1	1	1	1	1	1	1	1	1	1	1	1	1
NDC1	3069	ES	2	1	3	0	0.9093	0.4043	0.062	0.9243	1	1	0.9365	1	1	1	1		0.9419	1	0.9647	1	1	0.9465	0.9412		1	0.9266	1	0.9231		1	1	1	1	1		0.9519	1			1	1	0.8455	1	1	1		1
YIPF1	3070	AP	1			0	0.9965	0.1972	0.0179	0	0.0053	0	0.0056	0	0.0286	0	0.005	0	0.0309	0.0099	0.0343	0.0293	0.0027	0.0079	0.0035	0.0218	0	0.0049	0	0.0205	0.1145	0.0079	0.0083	0.0113	0.0387	0.012	0	0.0151	0.0307	0.0124	0	0	0.0056	0	0.0097	0	0	0.0072	0.0095
YIPF1	3071	AP	2			0	0.9965	0.1972	0.0179	1	0.9947	1	0.9944	1	0.9714	1	0.995	1	0.9691	0.9901	0.9657	0.9707	0.9973	0.9921	0.9965	0.9782	1	0.9951	1	0.9795	0.8855	0.9921	0.9917	0.9887	0.9613	0.988	1	0.9849	0.9693	0.9876	1	1	0.9944	1	0.9903	1	1	0.9928	0.9905
YIPF1	3074	ES	12	11	13	0	1	0.6499	0.1003	0.6529	0.4549	0.7934	0.8488	0.7633	0.5244	0.724	0.7881	0.8822	0.72	0.755	0.7783	0.6513	0.7226	0.6564	0.8273	0.826	0.8381	0.9175	0.7008	0.7324	0.695	0.6978	0.7575	0.5404	0.8739	0.6849	0.8491	0.8045	0.7425	0.7143	0.5607	0.655	0.7392	0.848	0.7537	0.6235	0.6003	0.7785	0.7659
YIPF1	3077	ES	03:04:00	2	5	0	1	0.2371	0.0277	0.9493	0.9744	1	0.9806	0.9835	0.9366	1	0.9603	0.9421	1	1	0.9885	0.9792	0.9773	0.9906	0.9844	1	0.9807	0.929	0.977	1	1	1	1	1	0.9754	0.9772	1	0.9679	1	0.894	0.9342	1	0.9769	0.9863	0.975	1	0.9784	0.9815	0.9708
YIPF1	3078	ES	4	2	5	0	0.986	0.4241	0.054	0.8951	0.9703	1	0.948	0.9597	0.917	1	0.9135	0.904	1	1	0.9415	0.9632	0.9395	0.9493	0.9813	1	0.9862	0.8675	0.9813	1	1	1	1	1	0.9637	0.9717		0.9722	1	0.5759	0.923	1	0.9699	0.9723	0.9441	1	0.966	0.9639	0.9201
YIPF1	3079	ES	3	2	4	0	1	0.7492	0.1075	0.7078	0.5562	0.7536	0.7473	0.7387	0.6209	0.7184	0.7436	0.6358	0.7226	0.6111	0.8511	0.6608	0.7569	0.8565	0.5643	0.5625	0.4335	0.6824	0.4693	0.4073	0.5243	0.7395	0.5477	0.7932	0.6225	0.6026	0.8511	0.516	0.5475	0.8852	0.6118	0.5156	0.6063	0.6947	0.7147	0.545	0.6382	0.709	0.7709
HSPB11	3095	AP	1			0	0.9983	0	0	1	1	1	1	1	1	1	1	1	1	1	1	1	1	1	1	1	1	1	1	1	1	1	1	1	1	1	1	1	1	1	1	1	1	1	1	1	1	1	1
HSPB11	3096	AP	2.1			0	0.9983	0	0	0	0	0	0	0	0	0	0	0	0	0	0	0	0	0	0	0	0	0	0	0	0	0	0	0	0	0	0	0	0	0	0	0	0	0	0	0	0	0	0
HSPB11	3097	AT	6			0	1	0.6636	0.0975	0.6892	0.7588	0.7536	0.6772	0.8385	0.761	0.4399	0.8055	0.8583	0.7724	0.6798	0.7096	0.5574	0.6212	0.8526	0.6409	0.7733	0.6716	0.7422	0.7525	0.7438	0.8263	0.7344	0.6889	0.675	0.7962	0.7797	0.759	0.8013	0.7765	0.8856	0.8299	0.8887	0.8869	0.8458	0.8524	0.7887	0.9072	0.9035	0.5648
HSPB11	3098	AT	5.2			0	1	0.2632	0.0291	0.0507	0.0628	0.0302	0.0507	0.0174	0.0524	0.1281	0.0148	0	0.0443	0.048	0.0799	0.1145	0.0741	0.0138	0.042	0.0633	0.0366	0.0275	0.0304	0.0906	0.0254	0.0662	0.0708	0.0417	0.0358	0.036	0.0402	0.026	0.0442	0.01	0.0107	0.008	0.0043	0.0155	0.0113	0.0326	0.0075	0.0049	0.072
HSPB11	3099	AT	7			0	1	0.4204	0.0662	0.2381	0.1469	0.1948	0.2519	0.1329	0.1758	0.4227	0.1707	0.1361	0.1576	0.2429	0.1798	0.2879	0.2776	0.1201	0.2994	0.1576	0.2692	0.2169	0.2032	0.1426	0.1464	0.1865	0.2046	0.2483	0.1582	0.1637	0.189	0.1618	0.1666	0.0981	0.1572	0.0975	0.1057	0.13	0.1268	0.1701	0.0853	0.0892	0.3417
HSPB11	3100	AT	3.2			0	1	0.2033	0.0189	0.022	0.0315	0.0214	0.0202	0.0112	0.0108	0.0093	0.009	0.0056	0.0258	0.0292	0.0308	0.0402	0.0272	0.0135	0.0176	0.0058	0.0226	0.0134	0.0139	0.0229	0.0019	0.0129	0.0356	0.035	0.0098	0.0205	0.0117	0.0109	0.0127	0.0062	0.0022	0.0057	0.0031	0.0088	0.0095	0.0087	0	0.0023	0.0214
LRRC42	3101	ES	2	1	3	0	0.9825	0.7952	0.1126	0.6474	0.6544	0.4903	0.6512	0.7114	0.7104	0.6619	0.5245	0.3869	0.6757	0.7063	0.3624	0.419	0.4774	0.5444	0.5403	0.464	0.6046	0.5552	0.4903	0.5845	0.7645	0.6733	0.6766	0.5556	0.5906	0.4967	0.5358	0.4903	0.6098	0.3247	0.4206	0.3898	0.5537	0.7204	0.4279	0.3511	0.3967	0.5423	0.2048
TMEM59	3108	AP	4.1			0	1	0.5581	0.095	0.1923	0.2115	0.1485	0.1741	0.0489	0.2232	0.3535	0.1616	0.1581	0.3066	0.362	0.1799	0.2413	0.0741	0.1031	0.1194	0.0726	0.099	0.0822	0.316	0.1254	0.1577	0.1397	0.2463	0.1553	0.1614	0.1215	0.2595	0.145	0.1983	0.1845	0.2175	0.3576	0.0437	0.0582	0.1328	0.1276	0.0607	0.092	0.3433
TMEM59	3109	AP	2.1			0	1	0.4369	0.0548	0.0652	0.0669	0.0413	0.0905	0.0626	0.1011	0.029	0.0763	0.0226	0.1341	0.0982	0.1822	0.1048	0.0337	0.0429	0.037	0.015	0.0235	0.0197	0.1137	0.0652	0.0509	0.0975	0.0823	0.0632	0.0736	0.1064	0.0857	0.0284	0.099	0.0069	0.0331	0.0502	0.0134	0.0146	0.0507	0.0286	0.0106	0.02	0.0965
TMEM59	3111	AP	1.1			0	1	0.9704	0.1414	0.7425	0.7215	0.8101	0.7353	0.8885	0.6757	0.6175	0.7621	0.8193	0.5593	0.5398	0.638	0.6539	0.8921	0.854	0.8436	0.9125	0.8775	0.8982	0.5703	0.8094	0.7914	0.7628	0.6714	0.7815	0.765	0.772	0.6548	0.8265	0.7027	0.8086	0.7494	0.5922	0.9428	0.9271	0.8165	0.8438	0.9287	0.888	0.5602
TMEM59	3112	AT	3.2			0	1	0.062	0.0039	0.0007	0.0027	0.0006	0.0013	0	0	0	0	0	0.0015	0.0035	0.0012	0.0012	0.0005	0.0007	0	0	0	0.0012	0.0006	0.0016	0.0001	0	0.0004	0.0037	0.0009	0.0002	0.0005	0.0005	0	0	0.0014	0.0004	0	0.0008	0.0002	0.0007	0.0008	0.0005	0.0006
TMEM59	3113	AT	8			0	1	0.062	0.0039	0.9993	0.9973	0.9994	0.9987	1	1	1	1	1	0.9985	0.9965	0.9988	0.9988	0.9995	0.9993	1	1	1	0.9988	0.9994	0.9984	0.9999	1	0.9996	0.9963	0.9991	0.9998	0.9995	0.9995	1	1	0.9986	0.9996	1	0.9992	0.9998	0.9993	0.9992	0.9995	0.9994
TMEM59	3121	AD	1.2	1.1	2.2	0	1	0.2754	0.0207	0.9788	0.9746	0.9646	0.9629	0.9275	0.9719	0.9879	0.9888	0.9829	0.9748	0.9842	0.9488	0.9395	0.9709	0.9653	0.9712	0.962	0.9672	0.9411	0.9886	0.9404	0.9519	0.9404	0.9926	0.9581	0.957	0.9282	0.981	0.957	0.9518	0.9642	0.9662	0.9883	0.9655	0.9424	0.9699	0.9798	0.9553	0.9491	0.98
TCEANC2	3122	AP	2.1			0	0.986	0.4807	0.0388	0	0	0.0251	0	0	0	0	0.0242	0	0.0212	0	0	0	0	0	0	0	0	0	0	0	0	0	0	0	0	0	0	0	0	0	0	0	0	0	0	0	0	0.0281	0
TCEANC2	3123	AP	1			0	0.986	0.4807	0.0388	1	1	0.9749	1	1	1	1	0.9758	1	0.9788	1	1	1	1	1	1	1	1	1	1	1	1	1	1	1	1	1	1	1	1	1	1	1	1	1	1	1	1	0.9719	1
CYB5RL	3128	AT	4.3			0	1	0.8746	0.1721	0.2459	0.3838	0.0496	0.1805	0.0515	0.2688	0.2509	0.3693	0.2437	0.0856	0.3289	0.2456	0.1321	0.1795	0.1234	0.1729	0.6819	0	0.0491	0.0364	0.3054	0.6386	0	0.549	0.0319	0.3548	0.2517	0.4462	0.3227	0.113	0.439	0.7485	0.6764	0.1305	0	0.0961	0.416	0.3864	0.4852	0.0712
CYB5RL	3129	AT	10			0	1	0.8746	0.1721	0.7541	0.6162	0.9504	0.8195	0.9485	0.7312	0.7491	0.6307	0.7563	0.9144	0.6711	0.7544	0.8679	0.8205	0.8766	0.8271	0.3181	1	0.9509	0.9636	0.6946	0.3614	1	0.451	0.9681	0.6452	0.7483	0.5538	0.6773	0.887	0.561	0.2515	0.3236	0.8695	1	0.9039	0.584	0.6136	0.5148	0.9288
CYB5RL	3130	ES	08:09:00	7	10	0	1	0.6006	0.0641	1	0.9276	1	1	1	1	1	1	1	1	0.9211	0.9166	0.955	0.9544	0.925	1	1	1	0.8836	1	0.9139	1	1	1	1	1	0.8447	1	1	1	1	1	1	0.8468	0.7746	0.9373	0.8783	0.8106	1	1
CYB5RL	3132	ES	8	7	9	0	1	0.5615	0.1216	0.7625	0.7934	0.7806	0.8389	0.8928	0.9465	0.6286	1	1	0.9071	0.8443	0.7009	0.8257	0.6781	0.6888	0.7264	0.6756	0.8913	0.8331	0.681	0.765	1	0.8318	1	0.7817	0.8604	1	0.8354	1	0.8898	1	1	1	0.7536	0.4768	0.9507	0.8112	0.7575	0.9082	0.8422
MRPL37	3137	AT	8			0	1	0.2167	0.0287	0.0299	0.0121	0.0141	0.0171	0.0174	0.043	0.1076	0.0096	0.0301	0.0179	0.0096	0.1064	0.0425	0.018	0.0125	0.0146	0.0334	0.012	0.0251	0.0491	0.1845	0.0169	0.0292	0.024	0.0636	0.0443	0.0141	0.0457	0.0129	0.0399	0.0043	0.0089	0.008	0.0831	0.0342	0.0553	0.0328	0.0522	0.0105	0.1215
MRPL37	3138	AT	7			0	1	0.2167	0.0287	0.9701	0.9879	0.9859	0.9829	0.9826	0.957	0.8924	0.9904	0.9699	0.9821	0.9904	0.8936	0.9575	0.982	0.9875	0.9854	0.9666	0.988	0.9749	0.9509	0.8155	0.9831	0.9708	0.976	0.9364	0.9557	0.9859	0.9543	0.9871	0.9601	0.9957	0.9911	0.992	0.9169	0.9658	0.9447	0.9672	0.9478	0.9895	0.8785
MRPL37	3139	ES	00:03:04.100000	1	4.2	0	1	0.0064	0.0004	1	1	1	1	1	1	1	1	1	1	1	1	1	1	1	1	1	1	1	1	1	1	1	1	1	1	1	1	1	1	1	1	1	1	1	1	1	1	1	1
SSBP3	3140	AP	1			0	0.9983	0.1476	0.0142	1	1	1	1	1	1	1	0.9433	1	1	1	1	1	1	1	1	1	1	0.9662	1	1	1	1	1	1	1	0.9239	1	1	1	1	1	1	1	1	1	1	0.8524	1	1
SSBP3	3141	AP	2			0	0.9983	0.1476	0.0142	0	0	0	0	0	0	0	0.0567	0	0	0	0	0	0	0	0	0	0	0.0338	0	0	0	0	0	0	0	0.0761	0	0	0	0	0	0	0	0	0	0	0.1476	0	0
SSBP3	3142	ES	8	7	9	0	0.8115	0.204	0.019	1	1	1	1	1	1	1	1		1	0.9553	1	1	1	0.9871	1		1	1	1	1	1		1	1	1	1		1		1		1	1	1	0.9681	1	1	1	1
SSBP3	3144	ES	7	6	8	0	0.9965	0.9003	0.154	0.2086	0.7422	0.1824	0.2667	0.3092	0.3705	0.2632	0.2309	0.2577	0.2646	0.1663	0.1927	0.3587	0.1629	0.4525	0.2371	0.0427	0.2976	0.5459	0.545	0.4901	0.3424	0.0711	0.2104	0.2809	0.1318	0.1592	0.1783	0.6215	0.1244	0.2407	0.4242	0.3091	0.1264	0.175	0.1421	0.6419	0.2283	0.3253	0.5395
ACOT11	3145	AT	18			0	1	0.921	0.1637	0.2453	0.6006	0.3538	0.3043	0.1612	0.4298	0.2461	0.1679	0.2227	0.2908	0.2572	0.4807	0.3407	0.4332	0.1776	0.3505	0.3037	0.2215	0.216	0.2175	0.359	0.4011	0.2083	0.4822	0.4185	0.3803	0.2014	0.5996	0.2807	0.3996	0.1355	0.4538	0.3341	0.202	0.2285	0.2357	0.2418	0.3164	0.2728	0.6516
ACOT11	3146	AT	16			0	1	0.921	0.1637	0.7547	0.3994	0.6462	0.6957	0.8388	0.5702	0.7539	0.8321	0.7773	0.7092	0.7428	0.5193	0.6593	0.5668	0.8224	0.6495	0.6963	0.7785	0.784	0.7825	0.641	0.5989	0.7917	0.5178	0.5815	0.6197	0.7986	0.4004	0.7193	0.6004	0.8645	0.5462	0.6659	0.798	0.7715	0.7643	0.7582	0.6836	0.7272	0.3484
FAM151A	3147	ES	6.2:7:8.1	6.1	8.2	0	0.9599	0.0357	0.0021	1	1	1	1	1	1	1	1	1	1	1	1	1	1	1	1	1	1	1	1	1	1	1	1	1	1	1		1	1	1	1	1	1	1	1	1	1	1
MROH7-TTC4	3148	RI	31.2	31.1	31.3	0	0.9895	0.3852	0.0551	1	1	0.9767	1	0.8455	1	1	1	1	0.9692	1	1	1	0.9656	1	0.9426	1	1	1	1	0.8965	1	1	1	0.9515	0.9767	1	1	1	0.8914	1	1	1	1	1	1	0.9563	0.8556	1	1
MROH7-TTC4	3152	ES	4	3	5	0	0.993	0.2703	0.039	0.965	1	0.9327	1	1	0.9212	1	1	1	1	1	0.9506	0.9602	0.9806	1	0.9587	1	1	1	1	1	1	0.9223	1	0.9504	0.9719	1	1	0.982	0.9453	0.9255	1	1	1	1	0.9813	1	1	0.9723	0.9818
TTC22	3174	AT	8			0	1	0.4352	0.0522	0.9601	0.8791	0.9305	0.8003	0.9811	0.9357	0.9904	0.8039	0.9903	0.9298	0.8453	0.8138	0.9153	0.9652	0.9077	0.9633	0.8989	0.9422	0.9525	0.9053	0.9151	0.9455	0.9163	0.9248	0.9471	0.9457	0.9668	0.9154	0.9656	0.9587	0.9334	0.9641	0.8085	0.9886	0.9828	0.9742	0.9589	0.9309	0.9829	0.8228
TTC22	3175	AT	6			0	1	0.4352	0.0522	0.0399	0.1209	0.0695	0.1997	0.0189	0.0643	0.0096	0.1961	0.0097	0.0702	0.1547	0.1862	0.0847	0.0348	0.0923	0.0367	0.1011	0.0578	0.0475	0.0947	0.0849	0.0545	0.0837	0.0752	0.0529	0.0543	0.0332	0.0846	0.0344	0.0413	0.0666	0.0359	0.1915	0.0114	0.0172	0.0259	0.0411	0.0691	0.0171	0.1772
DHCR24	3178	AP	2			0	1	0.3466	0.0163	0	0.0013	0.0009	0.0019	0.0028	0	0.006	0	0	0	0.0012	0.0015	0	0.0057	0.0025	0.0016	0.0019	0.0039	0.009	0.0031	0.01	0	0.0104	0.0024	0	0.0011	0.0045	0.0043	0.013	0.0095	0.0222	0.0179	0	0.0004	0.0025	0.0039	0.0078	0	0.0149	0
DHCR24	3179	AP	1			0	1	0.3466	0.0163	1	0.9987	0.9991	0.9981	0.9972	1	0.994	1	1	1	0.9987	0.9985	1	0.9943	0.9975	0.9984	0.9981	0.9961	0.991	0.9969	0.99	1	0.9896	0.9976	1	0.9989	0.9955	0.9957	0.987	0.9905	0.9778	0.9821	1	0.9996	0.9975	0.9961	0.9922	1	0.9851	1
DHCR24	3180	ES	7	6	8	0	1	0.0189	0.0018	1	0.9979	1	0.9989	1	1	1	0.9977	1	1	1	0.9991	0.9982	0.9984	1	0.9995	1	0.9983	1	1	1	1	1	1	1	0.9976	1	0.9953	1	1	1	1	1	0.9987	0.9989	1	1	1	1	1
USP24	3187	ES	16	15	17	0	0.7941	0.1063	0.0126	1	1	1	1	1		1			1	1	1	1	0.97	1	1		1	0.9806	0.9006	1		1	1	1	1			1	1				1	1	1	1	1		1
USP24	3188	ES	14	13	15	0	0.8935	0.1067	0.0097	1	1	0.8933	1	1	1	1	1		1	1	1	1	0.976	1	1	1	1	1	1	1		1	1	1	1	1		1	1				1	1	1	1	1		1
USP24	3189	ES	1.2:2	1.1	3	0	0.8185	0	0	1	1	1	1	1		1			1	1	1	1	1	1	1		1	1	1	1			1	1	1	1			1				1		1	1	1		1
OMA1	3204	AT	10			0	1	0.0951	0.0087	0	0	0	0	0	0	0	0	0	0.0148	0	0	0	0	0	0	0	0	0	0	0.0123	0	0.0037	0	0	0.0027	0	0	0	0.0099	0	0	0	0	0.0115	0	0	0	0	0.0233
OMA1	3205	AT	9			0	1	0.0951	0.0087	1	1	1	1	1	1	1	1	1	0.9852	1	1	1	1	1	1	1	1	1	1	0.9877	1	0.9963	1	1	0.9973	1	1	1	0.9901	1	1	1	1	0.9885	1	1	1	1	0.9767
FGGY	3207	AP	1			0	0.7644	0.444	0.0468	1	1	0.8561	0.9421	1				1		1		1	0.9829	1	1	1	1	1	1			1		1	1	0.8976		1	1	1			1	1	0.9642	1	1
FGGY	3208	AP	2			0	0.7644	0.444	0.0452	0	0	0.1439	0.0579	0				0		0		0	0.0171	0	0	0	0	0	0			0		0	0	0.1024		0	0	0			0	0	0.0358	0	0
FGGY	3209	AP	10			0	0.7644	0.1731	0.0113	0	0	0	0	0				0		0		0	0	0	0	0	0	0	0			0		0	0	0		0	0	0			0	0	0	0	0
FGGY	3210	AT	20			0	0.9983	0.7089	0.0761	0	0	0	0.0056	0	0.0051	0	0	0.0011	0	0	0.0235	0	0.0047	0	0	0.0026	0	0.0152	0	0	0	0.0019	0	0.0131	0.0094	0	0	0.0191	0.0407	0.0032	0	0	0.0161	0	0.0031	0	0	0	0.0087
FGGY	3211	AT	22			0	0.9983	0.7089	0.0761	1	1	1	0.9944	1	0.9949	1	1	0.9989	1	1	0.9765	1	0.9953	1	1	0.9974	1	0.9848	1	1	1	0.9981	1	0.9869	0.9906	1	1	0.9809	0.9593	0.9968	1	1	0.9839	1	0.9969	1	1	1	0.9913
FGGY	3212	ES	15	14	16	0	0.9145	0.4521	0.0604	0	0.0332	0.0608	0.0643	0.078	0		0.2285	0.0743	0.1126	0.0438		0.0255	0.0361	0.0948	0.0659	0.0378	0.2067	0	0.0643	0.171		0.1146		0.0365	0.0718	0.0332	0	0.0476	0	0	0	0	0.0143	0.0873	0.0829	0.0728	0.0438	0	0.1358
FGGY	3213	ES	05:06:00	4	7	0	0.9983	0.25	0.0309	1	1	1	1	1	1	1	1	1	0.9231	1	1	0.9585	0.9664	1	1	0.8857	1	1	1	1	1	1	1	0.9221	1	0.9412	1	1	1	1	1	1	1	0.9027	1	1	0.9875	1	1
HOOK1	3215	AP	1			0	0.8133	0.5815	0.0584	1	1	1	0.9365	1	1	1	1		1	1	1	1	1	1	1	1	1	0.9605	1	1		1	1	1	1	1		1	1				0.9683	1	1	1			1
HOOK1	3216	AP	2			0	0.8133	0.5815	0.0584	0	0	0	0.0635	0	0	0	0		0	0	0	0	0	0	0	0	0	0.0395	0	0		0	0	0	0	0		0	0				0.0317	0	0	0			0
NFIA	3220	AP	3			0	0.9407	0.3074	0.0316	0	0	0.0279	0	0	0	0			0	0	0	0	0.0177	0	0	0	0	0.0144	0	0.145		0	0	0	0.0662	0	0	0	0			0	0.0098	0.0513	0.0397	0	0	0	0
NFIA	3221	AP	11.1			0	0.9407	0.452	0.0517	0	0	0	0	0	0	0			0	0	0.1846	0	0	0.3939	0	0	0	0	0	0		0	0	0	0	0	0	0	0			0	0	0	0	0	0	0	0
[truncated: 42,337 more rows]
[truncated: 247 more columns]
