# Supplementary material for: Survival-associated alternative splicing signatures in non-small cell lung cancer
Source: Aging (Albany NY). 2020 Apr 13;12(7):5878–93. doi: 10.18632/aging.102983 (PMC7185095; doi:10.18632/aging.102983)
Supplement: Supplementary Table 2. PSI_LUSC_1 [file aging-12-102983-s006..xlsx]

## Sheet: Table S2_PSI_LUSC
symbol	as_id	splice_type	exons	from_exon	to_exon	novel_splice	pct_with_values	psi_range	std_psi	TCGA_18_3406	TCGA_18_3407	TCGA_18_3408	TCGA_18_3409	TCGA_18_3410	TCGA_18_3411	TCGA_18_3412	TCGA_18_3414	TCGA_18_3415	TCGA_18_3416	TCGA_18_3417	TCGA_18_3419	TCGA_18_3421	TCGA_18_4083	TCGA_18_4086	TCGA_18_4721	TCGA_18_5592	TCGA_18_5595	TCGA_21_1070	TCGA_21_1071	TCGA_21_1072	TCGA_21_1075	TCGA_21_1076	TCGA_21_1077	TCGA_21_1078	TCGA_21_1079	TCGA_21_1080	TCGA_21_1081	TCGA_21_1082	TCGA_21_1083	TCGA_21_5782	TCGA_21_5783	TCGA_21_5784	TCGA_21_5786	TCGA_21_5787	TCGA_21_A5DI	TCGA_22_0940	TCGA_22_0944	TCGA_22_1000	TCGA_22_1002
PLEKHN1	1	ES	11	10	12	0	0.84	0.5588	0.0822	1	1		1	1		1	0.7786	1			0.9093	0.8876	0.7765	0.7343		1	0.894	0.9597		0.8257	0.8924	0.8836	1	0.9873	0.913	0.8257	0.8935	0.9151	1	1	1	0.8942	1	1	0.8748		0.8766	1	1
HES4	4	AD	1.2:1.3	1.1	2	0	0.9964	0.4599	0.0641	0.8927	1		0.9367	0.9232	0.9554	0.8592	0.9604	1	1	1	1	0.9361	0.9697	0.9746	1	0.9125	0.9195	0.8333	0.9451	0.9206	0.8641	0.8127	0.8838	0.914	0.9576	0.9206	0.9722	0.9006	0.8211	0.9187	0.9323	0.9124	0.9192	0.833	0.9751	0.9496	0.7841	0.9455	0.7485
HES4	5	ES	1.3	1.1	2	0	0.9945	0.4476	0.0654	0.8637	1		0.9325	0.9452	0.9342	0.7211	0.9398	1	1	1	1	0.9453	0.9743	0.9574	1	0.9454	0.9166	0.9373	0.9586	0.9027	0.7077	0.8222	0.9173	0.8637	0.9464	0.9605	0.9703	0.7239	0.8516	0.9555	0.9583	0.9602	0.9787	0.9773	0.9509	0.9258	0.7963	0.9355	0.8601
HES4	6	RI	1.2	1.1	1.3	0	0.9982	0.7683	0.1441	0.5907	0.6545	0.4035	0.546	0.4191	0.6122	0.7188	0.627	0.4016	0.4864	0.3108	0.3437	0.4766	0.4566	0.6367	0.3511	0.3894	0.5359	0.2651	0.4596	0.5787	0.7244	0.497	0.4397	0.6456	0.5866	0.3435	0.5363	0.7884	0.4579	0.3511	0.3986	0.3108	0.213	0.1098	0.689	0.6232	0.497	0.5699	0.3429
C1orf159	7	AP	1			0	0.8491	0.8815	0.1941		0.656			1		0.7722	0.7896		0.465		0.5665		0.4395	0.622			0.4881					0.5712	0.3075	0.8412	0.8266	0.5771	0.262	0.4703	0.5214	0.1925	0.3523	1	0.9235	1	1	0.4141	0.7177	0.7462	0.656
C1orf159	8	AP	3			0	0.8491	0.8075	0.146		0.344			0		0.2278	0		0.4181		0.2674		0.3458	0.1957			0.5119					0.1498	0.2419	0.1588	0.1734	0	0.2061	0.185	0.4786	0.8075	0.4519	0	0.0765	0	0	0.3258	0.2823	0.1309	0.344
C1orf159	9	AP	4.1			0	0.8491	0.695	0.1531		0			0		0	0.2104		0.1169		0.1661		0.2147	0.1823			0					0.2791	0.4507	0	0	0.4229	0.5318	0.3447	0	0	0.1959	0	0	0	0	0.2601	0	0.1229	0
C1orf159	10	AT	10.2			0	0.9982	0.2162	0.0368	0	0		0	0.0333	0	0.0174	0.0393	0.1133	0.0523	0.1577	0.0696	0.0315	0	0.1307	0	0	0.0871	0.0258	0	0	0.0336	0	0.044	0.0302	0.0222	0.1217	0.0295	0.1047	0.0902	0	0.0408	0	0.0217	0.0142	0.0438	0	0.0514	0.0251	0.03
C1orf159	11	AT	12			0	0.9982	0.2162	0.0368	1	1		1	0.9667	1	0.9826	0.9607	0.8867	0.9477	0.8423	0.9304	0.9685	1	0.8693	1	1	0.9129	0.9742	1	1	0.9664	1	0.956	0.9698	0.9778	0.8783	0.9705	0.8953	0.9098	1	0.9592	1	0.9783	0.9858	0.9562	1	0.9486	0.9749	0.97
C1orf159	12	RI	11.2	11.1	11.3	0	0.9764	0.9211	0.1487	0.7296	1		0.3664	0.906	0.7696	0.8202	0.7455	0.4614	0.7696		0.6728	0.8222	0.8181	0.7825		0.5856	0.7199	0.7387	1	0.7387	0.7387	0.9048	0.7825	0.6004	0.6255	0.9187	0.8484	0.8808	0.8885	0.6728	0.6744	0.2552	0.4513	0.8605	0.9043	0.6981	0.8388	0.7551	0.8222
C1orf159	13	AD	11.2:11.3	11.1	12	0	0.9909	0.9417	0.1704	0.5669	0.6621		0.3619	0.5838	0.3912	0.5554	0.5464	0.2105	0.462		0.6541	0.639	0.5728	0.5611		0.6177	0.5305	0.6098	0.3686	0.4439	0.2851	0.6446	0.2676	0.7217	0.5466	0.5835	0.5919	0.7134	0.6759	0.6015	0.3523	0.1416	0.2817	0.29	0.673	0.292	0.7874	0.5847	0.4033
C1orf159	14	ES	11.3	11.1	12	0	0.9509	1	0.1691	0.3663			0.4877	0.1501	0.1804	0.219	0.3194	0.2602	0.203		0.4956	0.3514	0.2208	0.2733		0.5627	0.3157	0.3782	0		0.179	0.1949	0.0933	0.6705	0.4711	0.1304	0.2355	0.2673	0.2337	0.4452	0.254	0.3333	0.367	0.0865	0.1915	0.1786	0.4299	0.3491	0.1437
C1orf159	15	ES	9	8	10.1	0	0.9764	0.1395	0.0178	0	0		0	0	0	0	0	0	0	0	0	0	0.0219	0		0	0	0.0344	0	0	0	0.0325	0	0.0122	0	0	0	0	0	0	0.0158	0	0	0	0	0	0	0.0472	0
C1orf159	16	RI	5.4	5.3	5.5	0	0.8582	0.7765	0.1772		1			0.8343		0.506	0.6057		1		1		0.7897				0.6525	0.7191	0.6719		1	1		0.8161	0.4344	1	0.8644	1	0.8411	0.374	1	0.5444		1	0.7835		0.7897	1	0.5614
C1orf159	17	RI	5.2:5.3:5.4	5.1	5.5	0	0.8091	0.7932	0.1655		0.8148			1		0.6643	0.7425	0.2068	1		0.6471		1				1	1	1		1	0.7578	0.4825	0.7599		1	1	1	1		0.6864	1		1	0.7346		1	1	1
C1orf159	20	AA	5.1:5.2:5.3:5.4	4.4	5.5	0	0.9745	0.6357	0.1043		0.2348		0.0656	0.2193	0.0217	0.0571	0.0921	0.0662	0.118		0.0576	0.027	0.213	0.0424		0.0662	0.0445	0.1506	0.1599	0.0545	0.0662	0.1506	0.0551	0.2697	0.0115	0.0916	0.1206	0.1714	0.137	0.0461	0.1026	0.0305	0.0217	0.1242	0.2249	0.0235	0.1942	0.1973	0.1099
C1orf159	21	AA	5.3:5.4	4.4	5.5	0	0.9364	0.2778	0.0499	0.092	0		0	0	0	0.0368	0	0	0		0.0985	0.0173	0	0			0.052	0	0	0	0	0	0.0299	0.0873	0.1022	0.0346	0.0367	0	0.1336	0.0813	0.0336	0	0	0	0.0684	0.0365	0.1262	0	0
C1orf159	22	ES	5.1:5.2:5.3	4.4	5.5	0	0.9491	0.3693	0.0501		0		0	0.0365	0	0.0445	0.0631	0	0		0	0.0237	0.0821	0.0253			0.0478	0.0647	0.0747	0.0375	0	0	0	0.0747	0.0139	0	0.0243	0	0.0287	0.2005	0	0.0145	0.0174	0	0.0783	0.0158	0.0618	0	0.0674
C1orf159	23	ES	5.3	4.4	5.5	0	0.9145	0.378	0.0367		0		0	0	0	0.029	0	0	0		0	0.0142	0	0			0.0439	0	0	0	0	0	0	0.0182	0.1149	0	0.006	0	0.0268		0	0	0	0	0.0196	0.0202	0.0341	0	0
C1orf159	24	ES	5.1	4.4	5.5	0	0.9291	0.3849	0.0533	0.1396	0.101		0.0199	0	0	0.0238	0.0361	0.1274	0		0.039	0	0	0.039			0	0.0513	0.0976	0	0	0.0836	0.0574	0.1481	0.0503	0	0.0155	0	0		0.0561	0.007	0.0424	0	0.1369	0.0089	0	0	0
C1orf159	25	RI	4.3	4.2	4.4	0	0.8945	0.6344	0.0494		0.1291			0.0232	0.0965	0.0519	0.0288		0.0414		0.0248	0.0507	0	0.0266			0.026		0.056	0.0175	0.0126	0.1668	0.0266	0.0187	0.014	0.0484	0.1567	0.0361	0.0965	0.0709	0.0694	0.0104	0.026	0.0484	0.0856	0.0709	0.0733	0.0251	0.0194
TNFRSF18	33	AP	2.1			0	0.9673	0.8014	0.1485	0.2089	0.43		0.1773	0.2869	0.0617	0.1311	0.1864	0.1385	0.2158	0	0.418	0.1151	0.4491	0.1773		0.1822	0.0311	0.2443	0.3073	0.1504	0.1117	0.2502	0.1017	0.1773	0.0548	0.0693	0.2394	0.276	0.2939	0.1182	0.1217	0.0516	0.2811	0.0494	0.439	0.1819	0.2527	0.2823	0.1391
TNFRSF18	34	AP	1			0	0.9673	0.8014	0.1485	0.7911	0.57		0.8227	0.7131	0.9383	0.8689	0.8136	0.8615	0.7842	1	0.582	0.8849	0.5509	0.8227		0.8178	0.9689	0.7557	0.6927	0.8496	0.8883	0.7498	0.8983	0.8227	0.9452	0.9307	0.7606	0.724	0.7061	0.8818	0.8783	0.9484	0.7189	0.9506	0.561	0.8181	0.7473	0.7177	0.8609
TNFRSF18	35	AD	4.2	4.1	5.1	0	0.9545	0.2905	0.044	0.9825	0.8507			0.9695	0.9186	0.981	0.9435	0.929	0.9479	1	0.9594	0.9583	0.9574	0.973		0.9199	0.9421	0.9412	1	0.9574	0.9393	0.9094	0.9254		0.8906	0.9195	0.9656	0.9277	0.8593	0.9326	0.9459	0.9285	0.9594	0.8885	0.8967	0.9403	0.9261	0.9658	0.9421
TNFRSF18	36	ES	4.1:4.2:5.1	3	5.2	0	0.9964	0.1851	0.016	1	1	0.8248	0.8731	0.9938	0.9938	0.9916	0.9777	0.9892	0.9874	0.9571	1	1	0.9889	0.9915	1	0.9882	0.9797	0.9937	0.9762	0.9872	1	1	0.988	1	1	0.9857	0.9787	0.9875	0.9665	0.9951	0.9613	0.9821	1	0.9857	1	1	1	0.9863	1
TNFRSF18	37	ES	4.1:5.1	3	5.2	0	0.7564	0.5191	0.0976		1	0.8349	0.7528	0.878	0.9486	0.7566	0.7811	0.9111	0.858			1	0.8379	0.8253		0.9047	0.7865	0.9294		0.8185		1	0.9012			0.8865	0.6941	0.8859	0.8546	0.9526	0.6403	0.8477		0.9223	1	1	1	0.7517
SDF4	38	AT	8.2			0	1	0.0557	0.0074	0.9862	0.9954	1	1	1	1	0.9974	0.9934	1	1	1	1	0.9821	0.9897	1	1	1	0.9959	0.973	1	0.9962	1	0.9971	0.997	0.9864	1	0.9954	0.983	0.9922	0.9944	1	1	1	1	1	0.9964	0.9909	1	0.9976	0.9956
SDF4	39	AT	5			0	1	0.0557	0.0074	0.0138	0.0046	0	0	0	0	0.0026	0.0066	0	0	0	0	0.0179	0.0103	0	0	0	0.0041	0.027	0	0.0038	0	0.0029	0.003	0.0136	0	0.0046	0.017	0.0078	0.0056	0	0	0	0	0	0.0036	0.0091	0	0.0024	0.0044
SDF4	40	AA	8.1	7	8.2	0	1	0.1274	0.0188	0.0397	0.0439	0.0023	0.0304	0.057	0.0514	0.0558	0.0246	0.0444	0.0466	0.0141	0.0417	0.0372	0.0483	0.0555	0.0136	0.0183	0.0477	0.0461	0.0179	0.0447	0.0525	0.0293	0.0713	0.0591	0.0364	0.0296	0.0384	0.0301	0.027	0.0446	0.0459	0.0322	0.0458	0.0542	0.0494	0.0365	0.0499	0.0371	0.0215
SDF4	41	AA	6.1	4	6.2	0	1	0.1316	0.0126	0.0084	0.0131	0.0068	0.0019	0.0156	0.0031	0.0065	0.0116	0.0016	0.0121	0.0024	0.0126	0.0041	0.0316	0.0061	0.0036	0.0061	0.0095	0.0197	0.0082	0.0086	0.0141	0.0195	0.0109	0.0112	0.0064	0.0178	0.0226	0.0433	0.0083	0.0043	0.0116	0.0032	0.0046	0.0048	0.0247	0.0072	0.0127	0.0082	0.0243
UBE2J2	47	ES	6.1:6.2	5	7	0	1	0.1666	0.0265	0.0116	0.0214	0.006	0	0.0373	0.0361	0.0427	0.0202	0.0342	0.046	0	0.0137	0.007	0.1091	0.0016	0	0.0251	0.0427	0.0465	0.0196	0.0756	0.0295	0.0786	0.0391	0.0302	0	0.0575	0.0669	0.0625	0.0534	0.0426	0.0465	0.009	0.0574	0.0155	0.064	0.0195	0.0151	0.0286	0.0539
UBE2J2	48	ES	6.1	5	7	0	1	0.2747	0.0509	0.1209	0.0385	0.054	0.0818	0.0358	0.0868	0.0538	0.1287	0.081	0.0349	0.1451	0.1235	0.0102	0.0133	0.1344	0.1123	0.1334	0.0892	0.251	0.0554	0.093	0.1594	0.0639	0.0678	0	0.135	0.0192	0.1911	0.0697	0.0393	0.0725	0.0369	0.127	0.0729	0.1346	0.0935	0.1593	0.0334	0.033	0.0589
UBE2J2	52	ES	4	2.1	5	0	1	0.1273	0.018	0.0269	0.0375	0.0589	0.0326	0.0187	0.0244	0.0297	0.0549	0.0186	0.0411	0.1012	0.0239	0.0229	0.0242	0.0473	0.0456	0.0094	0.0081	0.0141	0.0211	0.0263	0.0128	0.0214	0.0445	0.037	0.0436	0.0327	0.0283	0.0224	0.0452	0.0407	0.0211	0.0283	0.0378	0.0289	0.0384	0.0367	0.0099	0.0316	0.0256
UBE2J2	53	ES	2.2:3	2.1	5	0	1	0.0534	0.0086	0	0	0	0	0	0	0.0175	0.0015	0.0028	0.003	0.0075	0	0.002	0.0071	0.0086	0.0109	0.0024	0	0.0105	0.006	0.0038	0	0.0034	0	0	0.0072	0.0026	0	0.0086	0	0.0071	0	0.0038	0.0101	0.0097	0.0026	0.0008	0.0094	0.0071	0.0169
UBE2J2	54	ES	3	2.1	5	0	1	0.0849	0.0136	0	0.0141	0.0211	0.0423	0.0243	0.0404	0.0132	0.0024	0.0052	0.0044	0.0382	0.0138	0.0029	0.0108	0.0135	0.0189	0.0035	0.0138	0.0159	0.0097	0.0055	0.0084	0.0058	0.0358	0.0169	0.0117	0.0038	0.0318	0.0135	0.0157	0.0103	0.0279	0.0067	0	0	0.0039	0.0012	0.005	0.0115	0.0072
UBE2J2	55	AD	2.2	2.1	5	0	1	0.2044	0.0266	0.0379	0.0608	0.0156	0.0175	0.0533	0.0307	0.1338	0.0337	0.135	0.0849	0.0059	0.0538	0.0472	0.0694	0.074	0.0294	0.0262	0.0698	0.0556	0.0362	0.0113	0.0318	0.0303	0.0589	0.0363	0.0303	0.0334	0.0423	0.0373	0.0566	0.0859	0.0588	0.0181	0.0442	0.0261	0.0244	0.0542	0.0277	0.0722	0.018
UBE2J2	57	ES	2.1:4	1.1	5	0	0.7855	1	0.1993		0.5131	1	0.38	0.3823	0.4964	0.3823	0.4974		0.3274			0.2092		0.4684						0.285			0.6188	0.384	0.6017	0.3147	0.416	0.2746	0.6362		0.6391	1	0.2834	0.8161		0.3427	0.2264	0.3116	0.1081
UBE2J2	63	ES	2.1:2.2	1.1	5	0	0.9327	0.9767	0.1903	0.7736	0.661		0.2897	0.6006	0.6461	0.8074	0.411	0.7524	0.5597		0.8355	0.3488	1	0.6551		1	0.8604	0.6	0.7787	0.2504	0.4382	0.4759	0.6891	0.4435	0.576	0.3659	0.5833	0.335	0.6515	0.6696	0.8617	1	0.3385	0.8485	0.6424	0.4771	0.4411	0.6047	0.2377
UBE2J2	65	ES	2.1	1.1	5	0	1	0.1442	0.0232	0.9893	0.9718	1	0.9653	0.9742	0.9859	0.9694	0.956	0.9592	0.9456	0.8961	0.9883	0.9275	1	0.9658	0.9821	1	0.9883	0.9648	0.9901	0.9574	0.9631	0.9704	0.9798	0.9652	0.9814	0.9556	0.9752	0.9509	0.9762	0.966	0.9918	1	0.9413	0.9959	0.9857	0.9528	0.9751	0.9583	0.9486
UBE2J2	66	AD	1.2	1.1	2.1	0	0.9927	0.1784	0.0255	0.0084	0	0.0607	0.0239	0.0048	0.0132	0.0452	0.002	0	0.0063		0	0.039	0	0.0335	0.0483	0.0343	0.0415	0.0816	0.1059	0.0603	0.0577	0.0126	0.0049	0.0064	0.1521	0.0628	0.0925	0.0205	0.0524	0.0109	0.0733	0.0304	0.0372	0.0419	0.0712	0.0518	0.0687	0.0081	0.0696
ACAP3	74	ES	21	20	22	0	0.9982	0.6157	0.0431	1	0.9625		1	1	1	0.8234	0.9868	0.8991	0.9172	1	0.9894	0.9539	0.9507	0.8851	1	0.9857	0.9851	0.9498	0.977	0.9706	0.9606	0.9795	0.9618	0.9297	1	0.9884	0.9805	0.941	0.9866	0.982	0.9859	0.9332	0.9837	0.9321	0.9358	0.9445	0.9028	0.9466	0.9391
ACAP3	75	ES	2	1	3	0	0.8418	0.2458	0.045		0.0864			0		0	0	0.0451	0		0.0568			0.0306		0	0.1038	0.0621	0.0621	0	0.0523	0.0568	0	0	0	0.0186	0.0244	0	0	0	0.0349		0		0	0	0.1074	0.0245	0.0451
CPSF3L	80	AA	11.1	10	11.2	0	1	0.4165	0.0794	0.1333	0.1661	0.0294	0.0417	0.1282	0.076	0.0759	0.1264	0.1077	0.2144	0.0391	0.2198	0.0569	0.2733	0.1418	0.0241	0.0844	0.089	0.1545	0.1139	0.1497	0.1081	0.2335	0.1217	0.1329	0.0594	0.0995	0.2328	0.2511	0.178	0.0649	0.1636	0.0488	0.078	0.0653	0.2715	0.039	0.157	0.1526	0.0769
CPSF3L	81	ES	00:10:11.100000	9	11.2	0	0.9855	0.4026	0.075	1	0.9297		1	0.8757	0.8368	1	0.8612	1	0.9091		1	0.85	0.9736	0.8835		1	0.9017	0.8731	1	0.7907	1	0.8885	0.85	0.8368	0.8917	0.9419	0.9367	0.9395	1	1	0.9153	1	0.9031	0.9178	0.8597	1	0.9436	1	0.7563
CPSF3L	82	ES	10	9	11.2	0	1	0.096	0.0097	1	0.991	1	1	0.9889	0.9916	1	0.9877	1	0.9851	1	1	0.9936	0.9942	0.9862	1	1	0.9941	0.9857	1	0.98	1	0.9806	0.9883	0.9864	0.9956	0.9961	0.9891	0.9882	1	1	0.9907	1	0.9948	0.9963	0.9651	1	0.9939	1	0.9857
CPSF3L	83	AA	7.1	6.2	7.2	0	1	0.0653	0.0116	0.9884	0.972	0.9717	0.9829	0.9799	0.9585	0.9745	0.9725	0.9753	0.9732	0.9857	0.9716	0.9897	0.9603	0.9882	0.9542	0.9799	0.9858	0.9361	0.9737	0.9801	0.9416	0.9884	0.9797	0.9732	0.9801	0.9711	0.9758	0.9686	0.9825	0.9878	0.9957	0.9554	0.9689	0.9735	0.9925	0.9543	0.9846	0.9938	0.9779
CPSF3L	84	AA	6.1	5.2	6.2	0	1	0.0984	0.0146	1	0.9938	0.9337	0.9168	0.9916	0.9894	0.9448	0.9757	0.9868	0.9828	0.9894	0.9601	0.9781	0.946	0.9828	0.9754	0.9777	0.9583	0.9817	0.9785	0.9653	0.9671	0.9604	0.9925	0.9815	0.9802	0.9864	0.9811	0.9676	0.9913	0.9914	0.9687	0.9665	0.9865	0.9919	0.9746	0.9961	0.9856	0.9837	0.9803
CPSF3L	85	ES	5.1:5.2:6.1:6.2:7.1:7.2:8	4	9	0	0.9909	0.2218	0.0159	1	1		1	1	1	1	1	1	1	1	1	1	1	1	1	1	1	1	1	1	1	1	1	1	1	0.9627	1	1	1	1	1	1	1	1	1	1	1	1	1
CPSF3L	86	ES	5.2:6.1:6.2:7.1:7.2:8	4	9	0	1	0.0069	0.0008	1	1	1	1	1	1	1	1	1	1	1	1	1	1	1	1	1	1	1	1	1	1	1	1	1	1	0.9975	1	1	1	1	1	1	1	1	1	1	1	1	1
CPSF3L	88	ES	5.2:6.2:7.1:7.2:8	4	9	0	0.9145	0.3189	0.0268			1	1	1	1	1	1	1	1		1	1	1	1	1	1	1	1	1	1	1	1	1	1	1	0.8768	1	1	1		1	1	1	1	1		1	1	1
CPSF3L	91	ES	5.2:6.1:6.2:7.2:8	4	9	0	0.9582	0.2971	0.0222	1	1	1	1	1	1	1	1	1	1	1	1	1	1	1	1	1	1	1	1	1	1	1	1	1	1	0.9534	1	1	1	1	1	1	1	1	1	1	1	1	1
CPSF3L	94	ES	5.1:5.2:6.1:6.2	4	7.1	0	0.9873	0.2823	0.023	1	1		0.8094	0.934	1	1	0.9627	1	1	1	1	1	1	1	1	1	1	1	0.8815	1	1	0.9563	1	0.9482	0.9066	1	1	0.9775	1	1	0.967	1	1	1	1	1	1	1	1
CPSF3L	95	ES	5.2:6.1:6.2	4	7.1	0	1	0.0142	0.0017	1	1	1	0.9921	0.9972	1	1	0.9967	1	1	1	1	1	1	1	1	1	1	1	0.9858	1	1	0.9948	1	0.9972	0.9934	1	1	0.9965	1	1	0.9969	1	1	1	1	1	1	1	1
CPSF3L	97	ES	5.2:6.2	4	7.1	0	0.8818	0.3445	0.0444			1	0.9324	0.7838	1	1	0.9029	1	1		1	1	1	1		1	1	1	0.6555	1	1	0.9104		0.8946	0.8019	1	1	0.9252	1		0.9295	1	1	1	1		1	1	1
CPSF3L	98	AA	5.1	4	5.2	0	1	0.3951	0.0699	0.0448	0.1172	0	0.0442	0.0531	0.0433	0.0632	0.1082	0.079	0.1462	0.0229	0.0572	0.1028	0.183	0.1152	0.0613	0.0589	0.0441	0.1416	0.1158	0.0662	0.1052	0.133	0.0574	0.0636	0.0741	0.0721	0.1023	0.1748	0.0865	0.1316	0.0984	0.0134	0.0244	0.0353	0.2641	0.0358	0.0906	0.0707	0.0523
CPSF3L	120	ES	4:5.1:5.2:6.1:6.2	1	7.1	0	0.8964	0.916	0.1565		0.7311		0.7843	0.424		1	1	1	1		1	1	0.8479	0.5863		1	1	1	1	0.6458	1	1	1	1	1	0.9025	0.9754	0.9648	0.7402	1	1	1	0.7865	0.6683	0.9523	0.8443	1	1	1
CPSF3L	124	ES	4:5.2:6.1:6.2	1	7.1	0	1	0.0441	0.0045	1	0.9939	1	0.9918	0.9914	1	1	1	1	1	1	1	1	0.9946	0.9904	0.9855	1	1	1	1	0.9942	1	1	1	1	1	0.9953	0.9987	0.9965	0.9955	1	1	1	0.9962	0.9909	0.9922	0.9961	1	1	1
CPSF3L	132	ES	4:5.2:6.2	1	7.1	0	0.9145	0.7155	0.1075			1	0.9329	0.5518	1	1	1	1	1		1	1	0.9353	0.706	0.666	1	1	1	1	0.8967	1	1	1	1	1	0.7954	0.9539	0.9306	0.7289		1	1	0.836	0.5423	0.8258		1	1	1
CPSF3L	138	ES	2.1:2.2:3	1	4	0	0.9982	0.3096	0.0304	0.0059	0.0038		0.0014	0	0.0115	0.0069	0.0088	0.0072	0.0177	0.0005	0.0229	0.0008	0.0284	0.0069	0.009	0.2186	0.0098	0.0095	0	0.001	0.0086	0.0108	0.0121	0.0035	0.0392	0.0033	0.002	0	0.0074	0.023	0.0901	0.0095	0.0097	0.0031	0.0046	0	0.001	0.0192	0
CPSF3L	139	ES	2.1:3	1	4	0	0.9982	0.1747	0.0163	0	0.0078		0.0088	0	0.0085	0.0089	0	0	0	0.0021	0	0.0053	0.0127	0.0057	0	0	0	0.0377	0.0357	0.0042	0	0	0	0.0083	0.0103	0.0036	0.0041	0	0.0134	0.0073	0.0498	0	0.0498	0.0095	0.0063	0.0142	0.002	0	0.0111
CPSF3L	140	ES	2.1	1	4	0	0.9982	0.2189	0.0333	0.0634	0		0.0046	0	0.0082	0.0065	0.0107	0.0396	0	0.003	0.0217	0.0028	0	0.0079	0	0.1574	0.0147	0	0.025	0.0058	0.0242	0.0483	0.0225	0.0115	0.0234	0.0038	0.0242	0	0.0272	0.0055	0.0793	0.0178	0.0215	0.0505	0.0088	0.0073	0.0161	0	0.0098
DVL1	141	AD	11.2	11.1	12	0	0.9982	0.7311	0.1443	0.2519	0.5037		0.5081	0.3662	0.7772	0.7119	0.5497	0.5999	0.5177	0.824	0.7484	0.4987	0.694	0.7015	0.3179	0.5745	0.4732	0.5526	0.2824	0.6153	0.5612	0.4634	0.6602	0.6291	0.1551	0.4661	0.7831	0.6036	0.4798	0.6251	0.5579	0.5208	0.5091	0.7689	0.7336	0.3295	0.454	0.5272	0.3957
MXRA8	142	AP	1			0	0.9873	1	0.1218	0	0.0524		0.0098	0	0.0174	0	0.0185	0.0099	0.2872	0	0.6481	0	0.069	0.0074	0.012	0.033	0.0308	0.044	0.0183	0.0211	0.0617	0.0403	0.0262	0.1032	0.0054	0.0095	0.0781	0.0395	0.0807	0.0179	0.06	0.0041	0.0111	0.0262	0.0277	0	0.011	0.0049	0.0194
MXRA8	143	AP	2			0	0.9873	1	0.1218	1	0.9476		0.9902	1	0.9826	1	0.9815	0.9901	0.7128	1	0.3519	1	0.931	0.9926	0.988	0.967	0.9692	0.956	0.9817	0.9789	0.9383	0.9597	0.9738	0.8968	0.9946	0.9905	0.9219	0.9605	0.9193	0.9821	0.94	0.9959	0.9889	0.9738	0.9723	1	0.989	0.9951	0.9806
MXRA8	144	AA	11.1	10.2	11.2	0	1	0.139	0.0146	1	0.9841	0.9022	0.9967	0.9905	0.9961	0.9955	0.9795	0.9915	1	0.9346	1	0.9842	0.9914	0.9721	0.9543	0.9742	0.9908	1	0.9929	0.9822	1	0.9837	0.9919	1	0.9941	1	0.9929	0.9829	0.9835	0.9929	0.9874	0.9872	0.9847	0.967	0.9927	0.9933	0.9764	0.987	0.9738
MXRA8	145	AA	10.1	9	10.2	0	0.9964	0.23	0.0287	0.0361	0.0042	0	0.0031	0.0707	0.0245	0	0.0048	0.0358	0	0.0043	0.23	0	0.0041	0.0044	0.014	0.0103	0.0121	0.0161	0.0554	0.0099	0	0	0.0093	0.1433	0.0113	0.0351	0.0206	0.0208	0.0237	0.0076	0.005	0.0058	0	0	0.0304	0	0.0085	0.0076	0.0081
MXRA8	146	ES	4	3	5	0	0.9927	0.3305	0.04	1	1		0.9537	1	1	1	1	0.9362	1	0.9508	1	0.8534	0.9282	0.9545	1	0.9209	0.828	1	0.9678	1	1	0.9905	1	1	0.9783	0.9714	0.9603	0.9716	0.986	0.9795	0.9782	1	1	1	1	1	0.971	0.9867	1
AURKAIP1	147	RI	1.4	1.3	1.5	0	0.9909	0.7896	0.1329	0.1846	0.3049		0.0975	0.3035	0.2488	0.3956	0.2314	0.1266	0.472	0.3061	0.2453	0.2583	0.5238	0.3324	0.3644	0.2717	0.3418	0.1785	0.2005	0.3131	0.2307	0.3661	0.2673	0.1889	0.2233	0.1871	0.3386	0.3961	0.4121	0.2225	0.477	0.201	0.2119	0.3059	0.5321	0.3787	0.3077	0.2107	0.2617
AURKAIP1	148	RI	1.3:1.4	1.2	1.5	0	0.9782	0.754	0.1379	0.7291	1		0.6709	0.7767	0.8462	0.877	0.5777	0.8628	0.9729	1	1	0.9213	1	0.8126	0.5397	1	0.9121	0.6992	1	1	0.8241	0.9434	0.7744	0.7372	0.7779	0.721	0.9741	0.8781	0.8367	0.7257	0.9737	0.6844	0.6999	0.9351	1	1	1	0.6747	0.9014
AURKAIP1	149	AD	1.3	1.2	1.5	0	0.9945	0.3894	0.0522	0.942	1		0.9619	0.9104	0.9564	0.9444	0.8681	0.9806	0.9821	1	1	0.9763	1	0.9201	0.7499	1	0.9656	0.9462	1	1	0.9462	0.9762	0.938	0.9492	0.9538	0.9351	0.9914	0.9301	0.9116	0.9276	0.9841	0.9184	0.9355	0.9789	1	1	1	0.9379	0.9679
AURKAIP1	150	RI	1.2:1.3:1.4	1.1	1.5	0	0.9982	0.2862	0.0403	0.0224	0.0749		0.0215	0.0707	0.0406	0.0323	0.0306	0.0297	0.0674	0.0733	0.0422	0.0425	0.1073	0.0567	0.0607	0.0697	0.0724	0.0418	0.0454	0.0677	0.0732	0.1394	0.0594	0.0412	0.0315	0.0551	0.0979	0.1315	0.1047	0.0505	0.154	0.0374	0.0213	0.1005	0.0669	0.1078	0.0394	0.0241	0.0601
AURKAIP1	151	AD	1.2:1.3	1.1	1.5	0	0.9982	0.5411	0.0522	0.1026	0.1326		0.1857	0.1558	0.1228	0.0625	0.1126	0.1699	0.0847	0.2068	0.1311	0.1144	0.1507	0.1164	0.1201	0.1941	0.1484	0.2419	0.2886	0.2432	0.2541	0.2971	0.1976	0.2043	0.1476	0.2515	0.2722	0.2272	0.1881	0.1801	0.2007	0.1446	0.1067	0.2327	0.0804	0.186	0.1004	0.1353	0.1561
AURKAIP1	152	AD	1.2	1.1	1.5	0	0.9982	0.0832	0.0091	0.0055	0		0.0077	0.0145	0.0051	0.0033	0.0157	0.0033	0.0014	0	0	0.0025	0	0.0089	0.0346	0	0.0049	0.018	0	0	0.033	0.0125	0.0152	0.0126	0.0081	0.0342	0.0047	0.0279	0.029	0.015	0.0032	0.0122	0.0078	0.0055	0	0	0	0.0097	0.0059
CCNL2	155	AT	12			0	1	0.678	0.0775	0.4083	0.6317	0.3351	0.6138	0.5521	0.4283	0.504	0.687	0.4789	0.6732	0.4659	0.6895	0.6149	0.6366	0.6584	0.588	0.6001	0.6624	0.7078	0.5974	0.6475	0.5207	0.6608	0.657	0.6631	0.7077	0.6978	0.6963	0.754	0.6211	0.7056	0.6183	0.5392	0.7599	0.735	0.7281	0.6672	0.7011	0.7456	0.6999
CCNL2	157	AT	6.3			0	1	0.678	0.0775	0.5917	0.3683	0.6649	0.3862	0.4479	0.5717	0.496	0.313	0.5211	0.3268	0.5341	0.3105	0.3851	0.3634	0.3416	0.412	0.3999	0.3376	0.2922	0.4026	0.3525	0.4793	0.3392	0.343	0.3369	0.2923	0.3022	0.3037	0.246	0.3789	0.2944	0.3817	0.4608	0.2401	0.265	0.2719	0.3328	0.2989	0.2544	0.3001
CCNL2	158	AA	7.1	6.1	7.2	0	0.9309	1	0.0773	1	0.9672	1	1	0.8952	1	0.764	0.9244	1	0.9519	1	0.9731		0.9916	0.8792	1	0.9629	0.9581	1	1	1	0.9099	0.9813	0.9694	0.8671		0.8597	0.9819	1	0.9691	1	0.976	1		0.7537	0.9229	0.9242	0.9424	1	1
CCNL2	160	ES	6.1:7.1	5	7.2	0	0.9873	1	0.2487	0.9404	0.7299	0.6833	0.8034	0.7158	0.7419	0.3428	0.6738	0.69	0.6908	0.4521	0.8362	0	0.9083	0.7536	0.2908	0.7728	0.3472	0.6146	0.6521	0.6515	0.7174	0.7497	0.6966	0.2018	0	0.6402	0.9063	0.7419	0.8356	0.6509	0.7378	0.6807	0	0.3796	0.6495	0.4248	0.3346	0.6331	0.6648
CCNL2	161	ES	6.1:6.2	5	7.2	0	0.9273	0.7404	0.1687		0.163		0	0.1709	0	0.1053	0.4072		0.1245		0.1986	0	0.2944	0.4366	0	0.3425	0.1846	0.1677		0	0	0.2764	0.2583	0.0626	0.055	0.2918	0.2727	0.2473	0.3315	0	0.1736	0	0.0628	0.0844	0.2056	0.2857	0.0808	0.1252	0.2675
CCNL2	162	ES	6.1	5	7.2	0	0.8582	0.6603	0.1101		0.0833		0	0.2262	0	0.1379	0.1433		0.1029		0.1211	0	0.078	0.2976	0	0.1203	0.0234	0		0	0.1998	0.0544	0.0672	0.0369	0	0.2203	0.1501	0	0.1411	0	0.0683	0	0	0.1725	0.1372	0.0571	0.0285	0	0
CCNL2	163	AA	4.1	3	4.2	0	1	0.0735	0.0122	0	0.0081	0.0252	0.0288	0	0	0.0084	0.0141	0.0125	0.015	0	0	0	0.0209	0.0223	0	0	0.0326	0	0	0.024	0	0	0.069	0.0087	0.0244	0.0099	0.0135	0.019	0.005	0	0.0178	0	0.0415	0	0.0081	0	0	0.0296	0
CCNL2	164	AD	1.2	1.1	2	0	0.9982	0.1218	0.0202	0	0.028		0	0.0062	0.0125	0.0236	0.0085	0	0.0073	0	0	0.0336	0.0382	0	0	0	0	0.0209	0.016	0	0	0.0125	0.0209	0.0308	0.0127	0.0427	0.0133	0.008	0.0065	0.0344	0.0679	0	0	0.0188	0.0171	0.0228	0.0145	0	0
MRPL20	165	AT	4			0	1	0.1141	0.0189	0.9843	0.9643	0.979	0.9762	0.9535	0.9815	0.9847	0.9743	0.9879	0.9692	0.9941	0.9757	0.9893	0.9331	0.981	0.9822	0.9759	0.9764	0.9687	0.9671	0.9799	0.9792	0.9469	0.9784	0.9684	0.9809	0.9741	0.9455	0.9443	0.964	0.8805	0.9572	0.9845	0.9796	0.9928	0.9536	0.9795	0.9684	0.9641	0.9524
MRPL20	166	AT	3.2			0	1	0.1141	0.0189	0.0157	0.0357	0.021	0.0238	0.0465	0.0185	0.0153	0.0257	0.0121	0.0308	0.0059	0.0243	0.0107	0.0669	0.019	0.0178	0.0241	0.0236	0.0313	0.0329	0.0201	0.0208	0.0531	0.0216	0.0316	0.0191	0.0259	0.0545	0.0557	0.036	0.1195	0.0428	0.0155	0.0204	0.0072	0.0464	0.0205	0.0316	0.0359	0.0476
ANKRD65	167	ES	2	1.4	3	0	0.9509	1	0.0954	0.5376	0.179		0.0635	0.0336	0.045	0.0825	0.2338	0.1042	0.2338	0.0586	0.0357	0.0863	0.1901	0.1839	0.0677	0.0677	0.0384	0.0381	0.0399	0.108	0.0599	0.0567	0.0602	0.0672	0.0677	0.0983	0.0351	0.0616	0.0887	0.0825	0.0507	0.0904	0.1537		0.0812	0.0607	0.1296	0.068	0.0933
ANKRD65	168	ES	1.4:2	1.3	3	0	0.9109	0.9856	0.1781	0.1842	0.7098		0.165	0.1102	0.1448	0.3868	0.5116	0.4079	0.4359		0.1164	0.1865	0.6019	0.4458	0.1904	0.346	0.128	0.1249	0.2176	0.1355	0.2792	0.1759	0.2471	0.2233		0.2974	0.1428	0.2412	0.2399	0.2885	0.1638	0.411	0.3043		0.2002	0.1771	0.4092	0.2278	0.4443
ANKRD65	169	AD	1.4	1.3	3	0	0.94	0.6552	0.0614	0.7132	0.9473		0.7262	0.8211	0.8146	0.891	0.8626	0.8885	0.7982	0.7436	0.8341	0.7683	0.885	0.8192	0.8155	0.9031	0.8498	0.8528	0.8884	0.7276	0.8809	0.8283	0.8575	0.846	0.8056	0.8326	0.8515	0.8653	0.82	0.8401	0.8205	0.8922	0.7848		0.8092	0.8224	0.8671	0.8364	0.913
ANKRD65	170	RI	1.2	1.1	1.3	0	0.9764	0.8247	0.1457	0.4566	0.4782	0.3289	0.5676	0.3271	0.8112	0.8305	0.7549	0.5699	0.7006	0.7462	0.6649	0.4465	0.7908	0.6199	0.7662	0.7503	0.7132	0.495	0.5734	0.7631	0.6431	0.5952	0.5317	0.4237	0.6269	0.84	0.7726	0.6994	0.7405	0.6708	0.6787	0.4306	0.7042	0.5576	0.6237	0.5004	0.6717	0.6023	0.508
VWA1	171	AA	2.1	1	2.2	0	0.9982	0.0769	0.0099	1	0.9861		0.9925	0.9841	0.9816	0.9711	0.9984	0.9964	0.9813	1	0.9875	1	0.9738	0.995	0.9678	0.9906	0.9819	0.9893	0.9935	0.981	0.9818	1	0.9852	1	1	0.9791	0.9758	0.9868	0.9856	0.9953	0.9892	0.9848	0.9838	0.9857	1	0.9918	0.9893	0.9846	0.9777
ATAD3B	172	AT	8			0	0.9982	0.1485	0.0214	0	0.0411		0	0.0249	0	0	0.0345	0	0.0622	0	0.0116	0	0.0589	0.0168	0	0	0.0112	0	0	0.0562	0.0292	0.0191	0.0715	0	0.0138	0.0057	0.0347	0.0155	0.0111	0.0488	0.0272	0.0145	0	0.0045	0.0057	0.0429	0.0187	0.0331	0
ATAD3B	173	AT	17			0	0.9982	0.1485	0.0214	1	0.9589		1	0.9751	1	1	0.9655	1	0.9378	1	0.9884	1	0.9411	0.9832	1	1	0.9888	1	1	0.9438	0.9708	0.9809	0.9285	1	0.9862	0.9943	0.9653	0.9845	0.9889	0.9512	0.9728	0.9855	1	0.9955	0.9942	0.9571	0.9813	0.9669	1
ATAD3A	174	AP	1			0	0.9927	0.4487	0.0788	0.8938	0.8529		1	0.9623	0.895	0.9393	0.7372	0.8658	0.8305	1	0.841	0.7142	0.9295	0.8465	0.9309	0.909	0.7756	0.7455	1	1	1	0.8384	0.8938	1	0.9812	0.9414	0.8019	0.7302	0.9218	0.9132	0.9725	0.9266	0.8443	0.9446	0.7227	0.9206	0.8432	0.8205	0.8583
ATAD3A	175	AP	2			0	0.9927	0.4487	0.0788	0.1062	0.1471		0	0.0377	0.105	0.0607	0.2628	0.1342	0.1695	0	0.159	0.2858	0.0705	0.1535	0.0691	0.091	0.2244	0.2545	0	0	0	0.1616	0.1062	0	0.0188	0.0586	0.1981	0.2698	0.0782	0.0868	0.0275	0.0734	0.1557	0.0554	0.2773	0.0794	0.1568	0.1795	0.1417
ATAD3A	176	AA	4.1	3	4.2	0	0.9945	0.7954	0.1602	0.2063	0.4241		0.1702	0.4381	0.1668	0.2252	0.2718	0.3558	0.3565	0.0271	0.291	0.3476	0.4904	0.3008	0.0723	0.2078	0.2314	0.3975	0.3531	0.3471	0.4579	0.4276	0.1887	0.3015	0.2262	0.1814	0.2708	0.3321	0.5191	0.1057	0.1764	0.1017	0.2353	0.0945	0.6203	0.1959	0.2655	0.3037	0.2663
SSU72	179	AT	2.2			0	1	0.4189	0.061	0.0314	0.1095	0.0532	0.1286	0.1173	0.0311	0.0629	0.0826	0.0175	0.0799	0.0246	0.0318	0.0139	0.1285	0.0403	0.0499	0.2213	0.0476	0.0335	0.0396	0.0401	0.0224	0.1002	0.0627	0.1281	0.0213	0.036	0.0424	0.0314	0.0736	0.1614	0.0551	0.0368	0.0363	0.027	0.0961	0.0462	0.0188	0.0658	0.0805
SSU72	180	AT	5			0	1	0.4189	0.061	0.9686	0.8905	0.9468	0.8714	0.8827	0.9689	0.9371	0.9174	0.9825	0.9201	0.9754	0.9682	0.9861	0.8715	0.9597	0.9501	0.7787	0.9524	0.9665	0.9604	0.9599	0.9776	0.8998	0.9373	0.8719	0.9787	0.964	0.9576	0.9686	0.9264	0.8386	0.9449	0.9632	0.9637	0.973	0.9039	0.9538	0.9812	0.9342	0.9195
MIB2	181	AP	2			0	0.9891	0.5053	0.0933	0.2663	0.1189		0	0.1837	0.2031	0.1142	0.0992	0.055	0.0931	0	0.0737	0.1018	0.1521	0.0741	0	0.0551	0.1986	0.133	0.1887	0.2479	0.467	0.1987	0.1493	0.1227	0.2703	0.2848	0.2993	0.2433	0.1765	0.3496	0.2037	0.2221	0.2872	0.3318	0.0723	0.2058	0.1907	0.2369	0.1633
MIB2	182	AP	4			0	0.9891	0.6273	0.0699	0.1413	0.1577		0.0418	0.0886	0.0539	0	0	0	0.1236	0.1231	0	0	0.0403	0.0246	0	0.4386	0.0416	0	0.1947	0.1371	0	0.0879	0.0248	0.0203	0.1195	0.0439	0.0491	0.0842	0.0468	0.0773	0.0246	0.0737	0	0.0677	0.1442	0.078	0	0.0742	0
MIB2	183	AP	1			0	0.9891	0.8258	0.1142	0.5924	0.6973		0.9236	0.7093	0.6984	0.7854	0.8027	0.945	0.7065	0.4692	0.8453	0.8237	0.7074	0.8809	0.917	0.4458	0.6449	0.6723	0.5936	0.5015	0.5116	0.6698	0.6415	0.8064	0.5771	0.5694	0.4965	0.5563	0.7379	0.5304	0.7242	0.6738	0.6911	0.5163	0.5849	0.6839	0.7394	0.5357	0.7021
MIB2	184	AP	3.1			0	0.9891	0.4077	0.058	0	0.0261		0.0346	0.0183	0.0446	0.1004	0.0981	0	0.0767	0.4077	0.081	0.0745	0.1002	0.0204	0.083	0.0605	0.1148	0.1947	0.023	0.1135	0.0214	0.0436	0.1844	0.0505	0.033	0.1019	0.1551	0.1162	0.0388	0.0427	0.0475	0.0305	0.0218	0.0841	0.1986	0.0323	0.0698	0.1532	0.1346
MIB2	188	RI	19.2	19.1	19.3	0	0.8982	0.1147	0.006	1	1			1	1	1	1		1		1		1	1		1	1	1	1	1	1	1	1	1	1	1	1	1	0.9935	1	1	1	1	1	1	1	1	1	1
MIB2	189	ES	19.1:19.2:19.3	18	20	0	0.9727	0.3143	0.04	0.9061	1			0.9616	1	1	0.9808	1	1		1	1	0.9693	1		1	1	1	1	0.94	1	1	1	1	1	0.957	0.9596	0.9749	0.9432	0.9773	1	0.9641	1	0.9519	1	1	1	0.9652	1
MIB2	191	RI	12.2	12.1	12.3	0	0.9818	0.4553	0.0716	0.0688	0.0998		0.0325	0.0825	0.048	0.0648	0.1081	0	0.1062		0.046	0.0648	0.3159	0.0441		0.0356	0.0118	0.1334	0.0494	0.071	0.0335	0.1386	0.1035	0.0127	0.0561	0.0768	0.0837	0.1835	0.3173	0	0.1509	0	0.0124	0	0.1056	0.0501	0.1976	0.1785	0.0872
MIB2	192	ES	11	10.2	12.1	0	0.9945	0.1835	0.0279	1	1		0.9511	0.9693	0.9555	0.8631	0.9804	0.9054	0.9456	1	0.9784	0.9707	0.9685	0.9357	0.882	0.9644	0.9548	0.9592	1	0.9695	0.9446	0.9736	1	1	0.9671	0.9471	0.9888	0.9431	0.9625	1	0.9825	0.9739	0.9862	0.9686	0.944	1	0.8963	1	1
MIB2	193	AA	10.1	9	10.2	0	0.9818	0.2924	0.0447	0.8337	0.976		0.95	0.934	1	1	0.9612	1	0.9738		0.8984	1	1	0.8984		0.9393	0.9765	1	0.855	1	1	0.9678	1	1	0.9744	0.9544	0.9553	0.9465	1	1	0.9116	1	0.9826	0.9409	0.9717	0.92	0.9139	1	1
MIB2	194	ES	10.1:10.2	9	11	0	0.9964	0.1814	0.0259	1	0.9834		1	1	1	0.9573	1	1	1	1	0.9732	1	0.9569	0.9524	1	1	1	0.914	1	0.9658	1	0.9707	1	1	1	0.9761	0.9793	1	0.9763	1	0.9902	1	1	1	1	0.9589	1	1	0.9742
MIB2	196	ES	8	7	9	0	0.9982	0.2556	0.0268	1	1		0.9838	1	1	0.8981	0.984	0.9506	1	1	0.9788	0.9711	1	0.9777	1	0.9811	0.9926	1	1	1	1	1	0.9638	0.9884	0.9823	1	0.9903	0.9388	0.9753	1	1	1	0.9881	1	1	1	1	1	0.9777
MIB2	197	AD	5.4	5.3	6	0	0.9164	0.3429	0.0633		0.9536		0.9249	0.9536	0.8915	0.8519	0.8519		0.9043				1	0.92		0.8519	1	1	1	0.9536	0.8809	0.9536	0.9426	0.8747	0.9536	0.9187	0.948	1	1	0.7325	0.982	1	0.8915	1	0.9327	0.9144	0.8915	0.9607	0.9293
MIB2	198	AD	5.3:5.4	5.2	6	0	0.9873	0.654	0.1093	1	0.9289		0.7742	0.9005	1	0.7347	0.9475	1	0.9447	1	0.7107	0.774	0.8856	0.8107	1	0.6462	0.7813	0.9276	0.9424	0.9553	1	0.8462	0.8671	0.8027	0.9004	0.883	0.9106	0.774	0.9352	0.8841	0.9612	0.8498	0.9409	0.9554	0.7829	0.8539	0.9301	0.9147	0.6995
MIB2	200	AA	5.1	3.2	5.2	0	0.8636	0.8049	0.1396		0.5786			0.7484	0.6157	0.8047	0.4303		0.5786		0.6319		0.8278	0.5336		0.5786	0.4724	0.8374	0.4071	0.3246	0.5406	0.4358	0.7621	0.559	0.5646	0.5362	0.5527	0.6003	0.4397	0.6467	0.4744	0.4901	0.4618	0.4901	0.7032	0.5786		0.4916	0.6905
MMP23B	201	RI	3.6	3.5	3.7	0	0.8382	0.3492	0.0468	0	0		0.0146	0.0376	0.0574	0.1299	0.0881	0.0519				0	0.0331	0.0404			0	0.0254	0		0	0.0364	0		0.0987	0.0987	0.1503	0.0836	0.1107	0	0.0389	0	0	0	0.0821	0	0.1085	0.0341	0.0248
MMP23B	202	RI	3.4	3.3	3.5	0	0.9455	1	0.1875	0.098	0.1712		0.1329	0.2084	0.0753	0.1426	0.1507	0.1062	0.461		0.7738	0.1815	0.3172	0.0955			0.2136	0.2754	0.1785		0.2154	0.2339	0.1597	0.3364	0.2609	0.2458	0.5795	0.23	0.369	0.168	0.1576	0.0629	0.0385	0	0.5843	0.0615	0.3338	0.1522	0.1112
MMP23B	203	RI	3.2	3.1	3.3	0	0.82	0.498	0.0785	0.0349	0.088		0.0926	0.0426	0.2433	0.046	0.0296					0.2244	0.0674	0.0371			0.0763	0.2626	0.4197			0.1935	0.1419		0.1419	0.1139	0.2424	0.29	0.306	0.1178	0.168	0.1363	0.046			0.1757	0.1337	0.113	0.1617
CDK11B	204	AP	1			0	1	0.2012	0.0314	0.7988	0.9065	0.9364	1	0.9196	1	0.972	0.973	1	0.9196	1	0.9675	1	0.9782	0.931	1	1	0.9326	0.9651	0.9498	0.9785	0.9307	0.9797	0.9368	0.978	0.9777	0.9605	0.9722	0.9587	0.9301	0.9531	0.9818	0.9655	0.9751	0.9633	0.9739	0.9708	0.9175	0.9741	0.9754
CDK11B	205	AP	2			0	1	0.2012	0.0314	0.2012	0.0935	0.0636	0	0.0804	0	0.028	0.027	0	0.0804	0	0.0325	0	0.0218	0.069	0	0	0.0674	0.0349	0.0502	0.0215	0.0693	0.0203	0.0632	0.022	0.0223	0.0395	0.0278	0.0413	0.0699	0.0469	0.0182	0.0345	0.0249	0.0367	0.0261	0.0292	0.0825	0.0259	0.0246
SLC35E2B	207	ES	2	1	3	0	1	0.8083	0.1473	0.5907	0.6221	1	0.6395	0.6973	0.8727	0.6866	0.6672	0.4481	0.6773	1	0.705	0.6747	0.6533	0.6398	0.8562	0.7011	0.5004	0.8712	0.6253	0.7011	0.6068	0.5222	0.5198	0.3091	0.7645	0.5581	0.6606	0.5966	0.6674	0.5679	0.6761	0.5509	0.4035	0.3721	0.6382	0.4742	0.8155	0.4889	0.6225
CDK11A	208	AP	1			0	0.9745	0	0		1	1	1	1	1	1	1		1		1	1	1	1		1	1	1	1	1	1	1	1	1	1	1	1	1	1	1	1	1	1	1	1	1	1	1	1
CDK11A	210	AP	2.1			0	0.9745	0	0		0	0	0	0	0	0	0		0		0	0	0	0		0	0	0	0	0	0	0	0	0	0	0	0	0	0	0	0	0	0	0	0	0	0	0	0
CDK11A	211	AT	12.2			0	1	0	0	0	0	0	0	0	0	0	0	0	0	0	0	0	0	0	0	0	0	0	0	0	0	0	0	0	0	0	0	0	0	0	0	0	0	0	0	0	0	0	0
CDK11A	212	AT	20			0	1	0	0	1	1	1	1	1	1	1	1	1	1	1	1	1	1	1	1	1	1	1	1	1	1	1	1	1	1	1	1	1	1	1	1	1	1	1	1	1	1	1	1
CDK11A	213	AD	11.2	11.1	12.1	0	1	0.4749	0.0745	1	0.8762	0.5251	0.935	0.8904	1	0.9733	0.8238	0.9299	0.8771	1	0.8884	0.7931	0.7596	0.9234	1	0.9078	0.9595	0.8125	0.9065	0.9628	0.7369	0.8062	0.8619	0.9308	0.9849	0.7962	0.7627	0.7164	0.8702	0.8458	1	0.8957	0.9381	0.9787	0.6964	0.8186	0.8404	0.9227	0.8722
CDK11A	214	AD	7.2	7.1	8	0	0.9673	0.7188	0.1311		0.4913		0.4126	0.1897	0.0975	0.3959	0.2832	0.5841	0.5693		0.4958	0.1494	0.4803	0.566		0.4675	0.135	0.4675	0.4126	0.4126	0.3758	0.513	0.3271	0.4836	0.534	0.341	0.5079	0.4126	0.4595	0.135	0.1876	0.5628	0.3238	0.746	0.2905	0.2243	0.549	0.3278	0.3692
CDK11A	216	ES	6.2	5	7.1	0	1	0.2292	0.032	1	0.8925	1	0.954	1	1	0.9192	0.9774	0.9234	0.921	1	0.9653	0.9627	0.9279	0.9822	1	0.9842	0.9487	0.9142	0.9344	0.9866	0.985	0.9557	1	0.9751	0.971	0.9512	0.9435	0.9411	0.9775	0.9801	0.9385	0.9654	0.9893	0.9649	0.935	0.954	0.9747	0.9666	0.9491
CDK11A	217	AA	6.1	5	6.2	0	1	0.1339	0.0153	0.0448	0.0197	0	0.0146	0.0355	0.0139	0.0251	0	0	0.0235	0.0355	0.0105	0.0243	0.0325	0.0111	0.0657	0.0285	0.0475	0.0216	0.019	0.022	0.0095	0.011	0.0087	0	0.0181	0.0091	0.0142	0.0113	0.0237	0.0106	0.046	0	0.0139	0	0	0	0.0083	0.0148	0.007
CDK11A	218	AD	4.2	4.1	5	0	0.9982	0.6141	0.089	1	0.6272	0.5468	0.582	0.7954	0.7724	0.6177	0.6584	0.7787	0.6523	0.3859	0.7102	0.9235	0.7033	0.751	1	0.7855	0.7904	0.5955	0.6059	0.8261	0.7592	0.5913	0.8519	0.7575	0.6496	0.7734	0.6629	0.6586	0.7328	0.6644	0.8099	0.4912	0.6981	0.8293	0.5785	0.7567	0.6534	0.7102	0.7296
CDK11A	219	RI	2.3	2.2	2.4	0	0.7982	0.7928	0.1568		0.2848			0.2651			0.3279		0.3046				0.218	0.358			0.2949	0.4107	0.5087	0.2949	0.1567	0.218		0.1567	0.1567	0.271	0.271	0.3172	0.358	0.2507	0.0679	0		0.0583	0.3534			0.3534	0.3172
CDK11A	220	AD	2.3:2.4	2.2	3	0	0.9927	0.3801	0.0687	0.1699	0.2239	0	0.1169	0.2302	0.0413	0.0746	0.2133		0.1392	0.2244	0.0458	0.1182	0.1965	0.1565	0	0.1017	0.1439	0.3319	0.3297	0.1001	0.0388	0.0491	0.0484	0.0512	0.0477	0.1784	0.129	0.0971	0.1698	0.2152	0.0312	0	0.0627	0.0301	0.1057	0	0.0587	0.1853	0.0999
CDK11A	221	ES	2.4	2.2	3	0	0.9945	0.6486	0.1121	0.3019	0.4498	0.2093	0.1143	0.4645	0.1512	0.3049	0.3786		0.2814		0.2235	0.3768	0.4874	0.2748	0.4528	0.1247	0.3146	0.4321	0.3544	0.2097	0.1817	0.1655	0.1957	0.2513	0.2256	0.3815	0.3066	0.2221	0.2774	0.4752	0.313	0.433	0.3354	0.3456	0.2016	0.2313	0.2021	0.3042	0.1965
SLC35E2	222	AT	8			0	0.9964	0.7966	0.1426	0.767	0.5585	0.5391	0.5167	0.4642	0.5166	0.6055	0.5445	0.6093	0.7107	1	0.5248	0.7455	0.5221	0.5421		0.3749	0.3511	0.6499	0.391	0.4381	0.4776	0.5956	0.3841	0.3348	0.5166	0.4752	0.5442	0.6224	0.4963	0.6093	0.9814	0.8239	0.4691	0.6386	0.7313	0.7051	0.5097	0.3063	0.5545
SLC35E2	223	AT	7			0	0.9964	0.7966	0.1426	0.233	0.4415	0.4609	0.4832	0.5358	0.4834	0.3945	0.4555	0.3907	0.2893	0	0.4752	0.2545	0.4779	0.4579		0.6251	0.6489	0.3501	0.609	0.5619	0.5224	0.4044	0.6158	0.6652	0.4834	0.5248	0.4558	0.3776	0.5037	0.3907	0.0186	0.1761	0.5309	0.3614	0.2687	0.2949	0.4903	0.6937	0.4455
SLC35E2	224	ES	2	1	3	0	0.8364	0.8961	0.2467		0.6649		1	1	1	0.7694	1		0.7485		0.4742		0.575	0.7164		0.2651	0.7011			1	1	1	0.7302	0.1883	0.7427	0.4481	0.3721	0.5198	0.7912	0.5907	0.9329		0.5907		1	0.6649		1	0.3248
NADK	225	AP	3			0	0.9982	0.9153	0.1544	0.3163	0.6584	0	0.4813	0.2954	0.5795	0.6174	0.5457	0.462	0.4318		0.3805	0.7028	0.444	0.4991	0.1267	0.6825	0.5567	0.2438	0.2084	0.4155	0.6752	0.2064	0.4972	0.4917	0.7889	0.6445	0.6053	0.4023	0.2678	0.7358	0.7363	0.5419	0.6067	0.5644	0.5772	0.3172	0.4657	0.3135	0.3787
NADK	226	AP	8			0	0.9982	0.698	0.109	0	0.0883	0.1784	0.0598	0.1112	0.0932	0.2215	0.1097	0.1838	0.1341		0.0625	0	0.221	0.1848	0	0.1164	0.2735	0.0429	0.2383	0.1559	0.1686	0.1204	0.1983	0.3166	0.0129	0.0271	0.1775	0.2762	0.1313	0.037	0.0811	0.104	0	0.0496	0.2532	0.1015	0.228	0.0712	0.0888
NADK	227	AP	2			0	0.9982	0.3113	0.0544	0	0.1178	0	0	0.0516	0.1037	0.0303	0.0558	0.0503	0.0636		0.0636	0	0.0543	0.1316	0.2116	0	0.079	0.0382	0.0326	0.0694	0.1091	0.0296	0	0.0786	0	0.1205	0.1264	0.0246	0.0479	0	0.0733	0.1234	0	0.0353	0.0916	0.0361	0	0.0468	0.0452
NADK	228	AP	1			0	0.9982	0.8216	0.1822	0.6837	0.1355	0.8216	0.4589	0.5418	0.2236	0.1308	0.2888	0.3039	0.3705		0.4934	0.2972	0.2808	0.1845	0.6617	0.2011	0.0908	0.6751	0.5207	0.3592	0.0471	0.6437	0.3045	0.1131	0.1982	0.2079	0.0908	0.2969	0.553	0.2272	0.1093	0.2307	0.3933	0.3507	0.078	0.5453	0.3063	0.5684	0.4872
NADK	229	ES	9.2:10.1	9.1	10.2	0	1	0.4053	0.0585	0.0156	0.0454	0.0283	0.0138	0.0357	0.0027	0.0158	0.0314	0.0185	0.0524	0.0374	0.034	0.0362	0.1099	0.0502	0	0.0398	0.0215	0.0673	0.068	0.0119	0.0326	0.0494	0.0576	0.0146	0.0438	0.0333	0.1451	0.1042	0.0555	0.006	0.035	0.0354	0.0093	0.0036	0.2002	0.0515	0.0979	0.0385	0.0314
NADK	230	ES	06:07:00	5	9.1	0	1	0.1197	0.0154	0	0.0055	0	0	0.0295	0.0043	0.0018	0.0084	0	0.0094	0	0.022	0	0.0299	0.0104	0	0.0051	0.0105	0.0042	0.0257	0.0081	0.0023	0.0255	0.008	0.011	0.0023	0.0044	0.0283	0.0242	0.0216	0.0105	0.0162	0.0018	0.0014	0.001	0.0255	0.014	0.0236	0.0101	0.0186
GNB1	231	ES	2	1	3	1	0.9909	0.1531	0.0256	0.8593	0.8924	0.9304	0.9017	0.8955	0.9312	0.9405	0.9139	0.9009	0.8798	0.8915	0.9473	0.935	0.928	0.8812	0.9221	0.9459	0.9027	0.9043	0.9245	0.9369	0.9272	0.9349	0.9317	0.9282	0.9429	0.9211	0.907	0.9159	0.9181	0.8853	0.9181	0.9244	0.8817	0.9705	0.888	0.9135	0.9246	0.9471	0.9205
PRKCZ	235	AP	8			0	0.9691	0.8705	0.1121	0	0.103		0	0	0	0	0	0	0.0492		0	0	0	0	0	0.1333	0.0261	0	0	0	0	0.1271	0	0.017	0	0	0.0284	0	0	0.1887	0	0	0.0215	0.4093	0	0	0	0	0.0888
PRKCZ	236	AP	6			0	0.9691	0.191	0.018	0	0		0	0	0	0	0	0	0		0.0295	0	0	0	0	0	0.0176	0.0722	0	0	0	0	0	0	0	0	0	0.0167	0	0.1586	0	0	0	0	0	0	0	0	0
PRKCZ	237	AP	7			0	0.9691	0.1183	0.0168	0	0		0	0	0	0.0268	0	0	0		0	0	0	0	0	0	0	0	0	0	0	0	0	0	0	0	0	0.0217	0	0.0412	0	0	0	0	0	0	0.0396	0	0
PRKCZ	238	AP	11			0	0.9691	0.5149	0.0805	0	0.1362		0	0	0	0	0.0932	0.1456	0.1299		0.1158	0.1689	0.1815	0.104	0	0	0	0.1419	0.1689	0	0	0.112	0	0.0448	0	0.0835	0.0501	0.164	0	0	0.0766	0.0752	0	0.0361	0.0982	0.1288	0	0.1116	0.1173
PRKCZ	239	AP	5			0	0.9691	0.2281	0.0251	0	0.0906		0.1938	0	0.0308	0	0.0465	0.0484	0.0216		0	0	0	0	0	0	0	0	0	0	0	0.0373	0	0.0149	0.0284	0	0.0042	0.0109	0	0.2281	0.0169	0	0	0	0	0	0	0	0
PRKCZ	240	AP	1			0	0.9691	0.9107	0.1394	1	0.6702		0.8062	1	0.9692	0.9732	0.8602	0.806	0.7993		0.8547	0.8311	0.8185	0.896	1	0.8667	0.9563	0.7858	0.8311	1	1	0.7236	1	0.9233	0.9716	0.9165	0.9173	0.7868	1	0.3834	0.9066	0.9248	0.9785	0.5546	0.9018	0.8712	0.9604	0.8884	0.7939
PRKCZ	243	ES	22	21	23	0	1	0.1119	0.0204	0	0.0617	0	0.0102	0.037	0	0.0114	0.0362	0	0.0287	0.03	0	0.0256	0.0686	0.0427	0	0	0.0188	0.009	0.0599	0.0552	0.0127	0.0382	0.0124	0.0093	0.0256	0.0228	0.0365	0.0211	0.0256	0.0124	0.0258	0.0106	0.0121	0.0141	0.0273	0.0375	0.0167	0.0471	0.0339
C1orf86	244	AP	1			0	0.9982	0.5598	0.0929	0.2634	0.1441		0.3229	0.0408	0.1159	0.0484	0.0888	0.0478	0.0927	0.1065	0.0088	0.2997	0.1602	0.1313	0.0503	0.0398	0.1372	0.076	0.0969	0.0991	0.073	0.1178	0.1276	0.027	0.0035	0.146	0.0184	0.0281	0.1583	0.034	0.0339	0.0711	0.009	0.0237	0.0441	0.11	0.0524	0.0781	0.1209
C1orf86	245	AP	3			0	0.9982	0.5598	0.0929	0.7366	0.8559		0.6771	0.9592	0.8841	0.9516	0.9112	0.9522	0.9073	0.8935	0.9912	0.7003	0.8398	0.8687	0.9497	0.9602	0.8628	0.924	0.9031	0.9009	0.927	0.8822	0.8724	0.973	0.9965	0.854	0.9816	0.9719	0.8417	0.966	0.9661	0.9289	0.991	0.9763	0.9559	0.89	0.9476	0.9219	0.8791
C1orf86	246	AT	7.2			0	1	0.8465	0.0815	0.7414	0.51	0	0.5276	0.7418	0.7157	0.7651	0.6038	0.6298	0.4461	0.7082	0.6733	0.5512	0.5216	0.6357	0.5817	0.5838	0.585	0.5091	0.5476	0.5881	0.7038	0.5669	0.621	0.6069	0.714	0.565	0.5618	0.5522	0.765	0.7177	0.7499	0.5812	0.6	0.6464	0.5391	0.664	0.5746	0.6507	0.5297
C1orf86	247	AT	10			0	1	0.8465	0.0815	0.2586	0.49	1	0.4724	0.2582	0.2843	0.2349	0.3962	0.3702	0.5539	0.2918	0.3267	0.4488	0.4784	0.3643	0.4183	0.4162	0.415	0.4909	0.4524	0.4119	0.2962	0.4331	0.379	0.3931	0.286	0.435	0.4382	0.4478	0.235	0.2823	0.2501	0.4188	0.4001	0.3536	0.4609	0.336	0.4254	0.3493	0.4703
C1orf86	248	ES	6:7.1:8:9	5	10	0	0.9182	1	0.135		0.0207		0.4089	0.0749	0.0274	0.0535	0.0984	0.1809	0.226		0.1053	0.0326	0.2083	0.0624		0.2599	0.1852	0.2676	0.2777	0.176	0.1539	0.2038	0.0672	0.1691	0.1365	0.1494	0.2557	0.1008	0.2842	0.036	0.1679	0.0918	0.1979	0.0888	0.2102	0.0323	0.1188	0.1118	0.1555
C1orf86	249	ES	7.1:8:9	5	10	0	0.9327	1	0.1656		0.0241		0.6812	0.0883	0.0319	0.063	0.2595	0.2249	0.3455		0.1221	0.0933	0.2598	0.082		0.3146	0.2359	0.4685	0.3329	0.4457	0.3738	0.5323	0.0861	0.2184	0.2579	0.3359	0.3249	0.3021	0.3539	0.0433	0.2053	0.123	0.2541	0.1176	0.2561	0.0385	0.1492	0.1455	0.2104
C1orf86	250	ES	6	5	7.1	0	1	0.8831	0.0894	0.3078	0.4357	1	0.3063	0.1998	0.2532	0.4563	0.2995	0.2031	0.4308	0.4491	0.2926	0.3068	0.2516	0.3272	0.2191	0.3012	0.3134	0.3422	0.253	0.2481	0.2783	0.2623	0.2478	0.2796	0.3582	0.313	0.3464	0.2855	0.3315	0.1946	0.3654	0.2539	0.2778	0.2296	0.4583	0.3002	0.4074	0.2886	0.3453
C1orf86	251	ES	4	3	5	0	0.9982	0.2395	0.0218	0.9819	0.9457		0.9677	0.9384	0.9329	0.9155	0.9476	0.9483	0.9834	0.9758	0.9694	0.9369	0.9822	0.9362	0.9314	0.9796	0.9849	0.9897	1	0.9193	0.9717	0.9622	0.9474	0.9677	0.9182	0.968	0.9888	0.9484	0.9629	0.9714	0.9977	0.96	0.9748	0.9782	0.9843	0.984	0.8702	0.9718	0.9644
MORN1	252	AT	8			0	0.9764	1	0.199	0.2138			0.0884	0.4322	0.2646	0.5444	0.217	0.1553	0.5537	0.0516	0.118	0.1685	0.5479	0.5058		0.5345	0.0817	0.6938	0.0721	0.2078	0.3232	0.2128	0.1303	0.2371	0.258	0.5447	0.6566	0.2807	0.0945	0.1878	0.1133	0.3462	0.2194	0.0138	0.0587	0.1837	0.17	0.2346	0.4117
MORN1	253	AT	17			0	0.9764	1	0.2283	0.3714			0.8601	0.5229	0.2955	0.2728	0.6682	0.5058	0.2672	0.8734	0.6368	0.4391	0.3295	0.4942		0.2199	0.6386	0.1446	0.4384	0.1203	0.4678	0.0792	0.4365	0.556	0.5688	0.2151	0.1697	0.6565	0.5351	0.7341	0.5751	0.6135	0.5117	0.9517	0.8789	0.6382	0.7594	0.5422	0.3487
MORN1	254	AT	13			0	0.9764	0.7483	0.1486	0.4148			0.0515	0.0449	0.44	0.1828	0.1148	0.3389	0.1791	0.075	0.2452	0.3923	0.1226	0		0.2456	0.2797	0.1615	0.4895	0.6719	0.209	0.7079	0.4333	0.207	0.1732	0.2402	0.1737	0.0628	0.3705	0.0781	0.3116	0.0403	0.2689	0.0345	0.0624	0.1782	0.0707	0.2232	0.2396
MORN1	255	ES	2	1	3	0	0.7836	0.5217	0.1089						0.9051	0.7804	0.7848		0.7633		0.7163	1	0.7372	0.8707		1	0.8707	1	1	1	1		1	1	0.8938	1	0.9083	1	0.9182		0.8266	0.8487	0.8178	0.9401				0.8684	0.6458
RER1	256	AP	1			0	1	0.4447	0.0793	0.9747	0.9008	0.9668	0.9423	0.9131	0.977	0.9783	0.975	0.9878	0.8888	0.9879	0.949	0.9899	0.7325	0.9757	0.9808	0.9307	0.9072	0.8853	0.8273	0.9363	0.9688	0.8911	0.9592	0.9636	0.9837	0.9727	0.8331	0.8569	0.9486	0.935	0.8649	0.9891	0.9692	0.9809	0.7068	0.9754	0.9645	0.9367	0.9258
RER1	257	AP	2.1			0	1	0.4447	0.0793	0.0253	0.0992	0.0332	0.0577	0.0869	0.023	0.0217	0.025	0.0122	0.1112	0.0121	0.051	0.0101	0.2675	0.0243	0.0192	0.0693	0.0928	0.1147	0.1727	0.0637	0.0312	0.1089	0.0408	0.0364	0.0163	0.0273	0.1669	0.1431	0.0514	0.065	0.1351	0.0109	0.0308	0.0191	0.2932	0.0246	0.0355	0.0633	0.0742
RER1	260	AA	6.1	5	6.2	0	1	0.1338	0.0173	0.0111	0.0159	0.0126	0.022	0.0267	0.0368	0.0132	0.0164	0.01	0.0267	0.0112	0.0285	0.013	0.0449	0.0258	0.0123	0.0246	0.0298	0.0109	0.0182	0.0118	0.0146	0.0254	0.0281	0.0185	0.0183	0.0142	0.0241	0.0349	0.047	0.0579	0.067	0.029	0.0201	0.0146	0.0573	0.0133	0.0375	0.0232	0.0395
RER1	261	ES	4	3	5	0	1	0.0522	0.0062	0.9912	0.984	0.9964	1	0.9967	0.9909	0.9952	0.9989	0.9987	0.9969	0.997	0.9938	0.9939	0.9862	0.9964	0.9858	1	0.9884	0.9985	0.9921	0.9935	1	0.9986	0.9987	0.996	0.9924	0.9918	0.9948	0.9949	0.9915	0.9939	0.9924	0.9988	0.9799	0.9932	0.9947	0.997	0.9871	0.9947	0.9943
PEX10	265	AA	7.1	6	7.2	0	0.9964	0.0323	0.0015	1	1		1	1	1	1	1	1	1	1	1	1	1	1	1	1	1	1	1	1	1	1	1	1	1	1	1	1	1	1	1	1	1	1	1	1	1	1	1
PEX10	266	AA	5.1	4.2	5.2	0	0.9964	0.3313	0.0471	0.1431	0.0796		0.0223	0.0582	0.1106	0.0826	0.1003	0.0665	0.0877	0.1417	0.2078	0.1362	0.2525	0.1591	0.0309	0.0473	0.0475	0.1679	0.0703	0.1215	0.1615	0.035	0.1314	0.0786	0.1099	0.095	0.1212	0.1218	0.0832	0.0889	0.1356	0.0674	0.0433	0.107	0.1894	0.0717	0.0677	0.0814	0.1218
PEX10	267	ES	4.2:5.1	4.1	5.2	0	0.7618	0.7307	0.1531	1	0.8257				0.8161	0.6812	0.676		0.6276		0.7931	0.831	0.8762	0.8313			0.4522	0.5095		0.9042	0.8616		0.7472	0.6848	0.6628	0.8342	0.7797	0.6838	0.5702		0.7858	1	0.8251	0.8551	1			0.803	1
PEX10	268	AD	4.2	4.1	5.2	0	0.9982	0.2384	0.0308	1	0.9823		1	0.9614	0.9736	0.9608	0.9515	0.9718	0.9472	1	0.935	0.9687	0.9583	0.9645	0.9479	0.9846	0.9458	0.8403	0.9746	0.9853	0.9702	1	0.9519	0.9632	0.9422	0.9803	0.9628	0.9432	0.9379	0.9693	0.9588	1	0.9909	0.9799	1	0.9796	0.9803	0.9787	1
PEX10	269	ES	2	1	3	0	0.8909	0.879	0.114		0.2801			0.1956	0.0966	0.0131	0.065		0.2314			0.1064	0.6045	0.0848		0.0382	0.1563		0.1503	0.1291	0	0.1395	0.065	0.0975	0.0614	0.0176	0.1563	0.1563	0.1316		0.0933	0	0	0.0705	0.2641	0.0848	0.122	0.0733	0.1064
PLCH2	272	AT	23.2			0	0.9964	0.5675	0.1012	0.9036	0.7603		0.7474	0.7063	1	0.7411	0.7676	0.7971	0.7177	0.8799	0.7138	0.9085	0.6989	0.835	0.878	0.684	0.8456	0.6477	0.6245	0.7913	0.8634	0.7018	0.7848	0.7496	0.8334	0.9308	0.7733	0.7698	0.7066	0.8735	0.8897	0.911	0.8455	0.7707	0.7674	0.6059	0.7482	0.7769	0.7342
PLCH2	273	AT	22.3			0	0.9964	0.5675	0.1012	0.0963	0.2397		0.2526	0.2937	0	0.2589	0.2324	0.2029	0.2823	0.1201	0.2862	0.0915	0.3011	0.165	0.122	0.316	0.1544	0.3523	0.3755	0.2087	0.1366	0.2982	0.2152	0.2504	0.1666	0.0692	0.2267	0.2302	0.2934	0.1265	0.1103	0.0891	0.1545	0.2293	0.2326	0.3941	0.2518	0.2231	0.2658
PLCH2	274	ES	22.2:23.1	22.1	23.2	0	0.8618	0.9242	0.2481	0.4703	0.7172			0.3866			0.3331	0.5834	1		0.7444	0.2731	0.7545	0.3107		0.5977	0.4043	0.5791	0.5061	0.3297	0.3997	0.7998	0.4463	0.4226	0.3846	0.5773	0.4473	0.4985	0.6927	0.1827	0.2142	0.1918	0.152		0.5681	0.4727	0.4456	0.4079	0.8407
PLCH2	275	ES	17	16	18	0	0.8855	0.6034	0.0902	1	0.9335		0.835	0.9639		1	0.9735	0.9324	0.7863	0.763	0.8973	0.734	0.8709	0.9681		1	0.9121	0.8567	0.9345	0.7995	0.8613	0.9041	0.9345	0.9933	0.92	1	1	0.8628	1	0.9645	0.9182	0.9587	0.8466		0.9171	0.8054	0.9261	0.9724	0.9599
PLCH2	276	ES	4.2:5.1:5.2:6:7:8:9:10:11:12:13:14:15:16:17:18	4.1	19	0	0.9727	0	0	1	1	1	1	1	1	1	1	1	1	1	1	1	1	1	1	1	1	1	1	1	1	1	1	1	1	1	1	1	1	1	1	1	1	1	1	1	1	1	1
PLCH2	278	ES	4.2:5.1:5.2:6:7:8:9:10:11:12:13:14:15:16:18	4.1	19	0	0.7655	0	0		1		1	1	1		1	1	1	1	1	1	1	1	1		1	1	1	1	1	1	1	1	1			1		1	1	1	1		1	1	1	1	1
PANK4	282	ES	2.5:3.1	2.4	3.2	0	1	0.0374	0.0062	1	1	1	1	1	1	1	1	1	0.9929	1	1	1	1	1	1	1	1	1	1	1	1	1	1	1	1	1	1	1	1	1	1	1	1	1	1	1	1	1	1
PANK4	283	RI	2.3	2.2	2.4	0	0.9964	0.292	0.0297	0.0017	0.0137	0	0.0074	0.0203	0	0	0.0272	0.0196	0		0.0028	0.0044	0.1142	0.0308	0.0097	0.0041	0	0.0523	0.0174	0.0113	0	0	0.0027	0.0043	0	0.0016	0.0401	0.0438	0.0183	0.0369	0.0444	0.0105	0	0.0042	0.0824	0.0044	0.0479	0	0.0259
PANK4	284	AA	2.1	1	2.2	0	0.9473	0.0876	0.0116	0	0	0	0	0	0	0	0.0227	0.0162	0		0	0	0	0	0	0	0		0	0	0	0	0.0274	0	0	0	0.0124	0	0	0.047	0.0087	0	0.005	0	0	0.0176	0	0	0
TNFRSF14	285	AP	1			0	1	0.2692	0.0245	0	0	0	0.1097	0.0219	0.0257	0.0175	0	0	0	0.0549	0.0101	0	0.0311	0.043	0	0	0.0321	0.0531	0	0	0	0.0077	0.0979	0.0204	0	0.0931	0.0087	0	0	0	0.042	0.0619	0	0	0.0223	0.015	0	0.009	0.0157
TNFRSF14	286	AP	2.1			0	1	0.2692	0.0245	1	1	1	0.8903	0.9781	0.9743	0.9825	1	1	1	0.9451	0.9899	1	0.9689	0.957	1	1	0.9679	0.9469	1	1	1	0.9923	0.9021	0.9796	1	0.9069	0.9913	1	1	1	0.958	0.9381	1	1	0.9777	0.985	1	0.991	0.9843
TNFRSF14	289	AA	7.1	6	7.2	0	1	0.5239	0.1029	0.1471	0.2709	0.0782	0.0773	0.225	0.0789	0.1138	0.2503	0.073	0.204	0.0118	0.1889	0.081	0.2873	0.2013	0.0515	0.0999	0.2064	0.2611	0.2564	0.1451	0.1533	0.2718	0.1573	0.1444	0.2145	0.1451	0.3461	0.2716	0.2436	0.1537	0.2024	0.0656	0.1017	0.0469	0.5141	0.1045	0.2851	0.1918	0.2187
FAM213B	290	AA	6.1	5	6.2	0	0.9945	0.6024	0.0851	0.6819	0.6599		0.5772	0.5974	0.4973	0.4684	0.5563	0.5409	0.5173	0.4259	0.5198	0.5598	0.6844	0.6497	0.7592	0.524	0.6267	0.6538	0.4756	0.5974	0.6165	0.7024	0.5298	0.581	0.5441	0.5693	0.57	0.8417	0.5346	0.69	0.6189	0.5735	0.5354	0.6733	0.6173	0.69	0.5267	0.6323	0.546
FAM213B	291	ES	5:6.1:6.2	4.2	6.3	0	0.9964	0.0784	0.0046	1	1	1	1	1	1	1	1	1	0.982	1	1	1	1	1	1	1	1	1	1	1	1	1	1	1	1	1	1	1	1	1	1	1	1	1	1	1	1	1	1
FAM213B	292	ES	00:05:06.200000	4.2	6.3	0	0.9945	0.089	0.0061	1	1		1	1	1	1	1	1	0.9841	1	1	1	1	1	1	1	1	1	1	1	1	1	1	1	1	1	1	1	1	1	1	1	1	1	1	1	1	1	1
FAM213B	293	AA	4.1	3	4.2	0	0.9909	0.3826	0.0452	0.208	0.0612		0	0.0551	0.071	0.0601	0.0444	0	0.0698	0	0.0177	0.0431	0.0338	0.0905		0.127	0.0993	0.0338	0.1171	0.0291	0.0379	0.0856	0.1228	0.0682	0.0864	0.0486	0.0451	0.0313	0.0462	0.0148	0.0496	0.0182	0.0457	0.0261	0.0902	0.0451	0.0579	0.0397	0.0431
ARHGEF16	307	AP	1			0	0.8018	1	0.2407		0.2426		0.103	0.4162	0.187	0.3475	0.3127	0.4247	0.1497		0.4329	0.3213				0.1069	0.5003	0.3375	0.5486	0.249		0.7603	0.8082	0.506	0.5134	0.936	0.7048	0.3719	0.3593	0.2249	0.4088	0.5375	0.4912	0.7633	0.1481	0.5741	0.5227	0.44	0.3105
ARHGEF16	308	AP	4.1			0	0.8018	0.8771	0.1623		0.1917		0.3661	0.2018	0.2217	0.1404	0.2316	0.2517	0.1693		0.2565	0.0952				0.2779	0.232	0.3692	0.2438	0.1844		0	0.0898	0.1636	0.1984	0.064	0.1177	0.3306	0.0672	0.3998	0.2948	0.1529	0.0794	0.0573	0.4755	0.0638	0.202	0.2243	0.345
ARHGEF16	309	AP	3.1			0	0.8018	0.7524	0.1495		0.1848		0.3923	0	0.2137	0.2888	0.2978	0.3236	0.1866		0.1649	0.3672				0.4325	0.2237	0.267	0	0.1897		0.2397	0	0.1262	0.1531	0	0.1068	0.179	0.4971	0.1028	0.12	0.0491	0.2041	0.0491	0.1362	0	0	0.1445	0.2661
ARHGEF16	310	AP	7			0	0.8018	0.8059	0.1458		0.3809		0.1386	0.3819	0.3776	0.2232	0.1578	0	0.4944		0.1456	0.2162				0.1827	0.0439	0.0262	0.2076	0.3769		0	0.102	0.2043	0.1352	0	0.0707	0.1185	0.0764	0.2724	0.1764	0.2604	0.2253	0.1302	0.2402	0.3621	0.2753	0.1912	0.0784
MEGF6	311	AP	1			0	0.8782	0.8604	0.1641	0.2269	0.0302		0.1303	0.0976	0	0.0915	0.1205				0		0	0		0	0.0759	0.0976		0.2781		0.1858	0.0991	0	0.0244	0.3101	0.5812	0	0	0.3857	0.0875	0.3393	0.1947	0.0466	0	0.272	0.1883	0.0834	0.2374
MEGF6	312	AP	6			0	0.8782	0.8604	0.1641	0.7731	0.9698		0.8697	0.9024	1	0.9085	0.8795				1		1	1		1	0.9241	0.9024		0.7219		0.8142	0.9009	1	0.9756	0.6899	0.4188	1	1	0.6143	0.9125	0.6607	0.8053	0.9534	1	0.728	0.8117	0.9166	0.7626
MEGF6	313	ES	39	38	40	0	0.9818	0.0185	0.0014	1	1		1	1	1	1	1	1	1	1	1	1	1	1	1	1	1	1	1	1		1	1	1	1	1	1	1	1	1	1	1	1	1	1	1	1	1	1
MEGF6	314	ES	00:36:37.100000	35	37.2	0	0.9964	0.1003	0.0077	1	1		0.9939	1	1	1	1	1	1	1	1	1	1	0.9756	1	1	1	1	1	1	1	1	1	1	0.9867	1	1	1	1	1	1	1	1	1	1	1	1	0.9949	1
MEGF6	315	ES	31	30	32	0	0.9582	0.8055	0.1703	0.7325	0.7609		0.7305	0.7292		0.3778	0.6892	0.6216	0.4894	0.6725	0.4003		0.8456	0.5436	0.7419	0.5399	0.3985	0.637	0.7871	0.3698		0.7449	0.8655	0.7146	0.4674	0.3456	0.4234	0.552	0.7196	0.6501	0.4444	0.6452	0.7687	0.6512	0.5679	0.7773	0.3774	0.7277	0.7477
MEGF6	317	ES	1 day, 2:27:00	25	28	0	0.9818	0.421	0.0625	1	0.8596		1	0.9455	0.7978	1	0.8984	0.8724	1	1	0.9359	1	0.9541	1	1	0.8947	0.9623	0.9669	0.8765	1		0.959	0.8868	0.9516	0.879	0.8019	0.9505	0.9409	0.8715	0.9589	0.9529	0.9211	0.9683	0.8755	0.8806	1	0.9437	0.9512	0.9749
TPRG1L	319	ES	3	2	4	0	1	0.0441	0.0051	1	1	1	1	1	1	1	0.9958	1	1	1	1	1	1	1	1	1	0.9928	0.9919	1	0.9868	0.9927	1	1	1	1	0.9978	0.998	1	1	1	0.9887	1	0.9952	1	0.9855	0.992	1	0.9962	0.9929
WRAP73	320	RI	11.2	11.1	11.3	0	1	0.542	0.0946	0.5137	0.3494	0.6259	0.3348	0.374	0.3392	0.3393	0.2314	0.3433	0.503	0.3937	0.4046	0.3325	0.4808	0.4471	0.4295	0.2466	0.3834	0.3777	0.3883	0.3433	0.3322	0.3704	0.2909	0.254	0.2633	0.2093	0.4002	0.4772	0.3627	0.2134	0.3012	0.1933	0.3262	0.366	0.5639	0.2608	0.4652	0.3842	0.4033
TP73	325	ES	15	14	16	0	0.9236	0.529	0.0876	0.8937	0.899	1	0.9669	0.7971	0.9707	1	0.978	0.8937	0.9548	1	0.9122	0.7759	0.8301	0.826	0.8447	1	0.8474	0.975	1	0.7079	1	0.8878	0.8654	0.8142	0.7983	0.8828	0.9358	0.8613		0.8132	0.877	0.8612	0.9747	0.8558	0.7677	0.7877	0.9303	0.8956	1
TP73	327	ES	13:14:15	12	16	0	0.9636	0.1586	0.0119	1	1	1	1	1	1	1	1	1	1	1	1	1	1	1	1	1	1	1	1	1	1	1	1	1	1	1	1	1	1	1	1	1	1	1	1	1	0.9716	1	1
TP73	330	ES	13:14:00	12	16	0	0.76	0.4128	0.0414	1	1			1					1		1	1	1	1			1			1			1	1	1	1	1	1		1	1	1		1	1	1	0.8105	1
TP73	332	ES	13	12	14	0	0.9545	0.2778	0.0482	1	1		1	0.9387	0.895	0.9472	0.9482	1	0.9482	1	0.9737	1	0.9779	0.8964	1	1	0.9799	1	0.9322	0.9634	1	1	1	1	0.9285	0.9622	0.9781	1	1	1	0.9663	0.9863	0.935	1	0.9721	1	0.9197	0.9193	1
TP73	333	ES	13:14:00	12	15	0	0.9455	0.191	0.0098	1	1		1	1	1	1	1	1	1	1	1	1	1	1	1	1	1	1	1	1	1	1	1	1	1	1	1	1	1	1	1	1	1	1	1	1	1	1	1
SMIM1	337	AT	3.2			0	0.9364	0.401	0.0595	0.0346	0		0	0	0	0.0304	0	0.0591			0.082	0.1287	0.0591	0		0.1255		0	0.1057	0.0941	0	0.223	0.0251	0.0287	0	0	0.0324	0.0913	0.0304	0.223	0.0669	0.0234	0.1211	0.034	0	0.1882	0	0	0
SMIM1	338	AT	4			0	0.9364	0.401	0.0595	0.9654	1		1	1	1	0.9696	1	0.9409			0.918	0.8713	0.9409	1		0.8745		1	0.8943	0.9059	1	0.777	0.9749	0.9713	1	1	0.9676	0.9087	0.9696	0.777	0.9331	0.9766	0.8789	0.966	1	0.8118	1	1	1
CEP104	339	AT	23			0	1	0.1105	0.0169	1	0.9907	0.9738	1	0.9777	1	0.965	0.992	0.9807	1	1	0.9909	1	0.9764	1	1	1	1	1	0.9446	1	0.9705	1	0.9844	0.9851	1	0.9779	0.9863	0.9764	1	0.9834	0.9755	1	1	1	0.9637	0.9793	0.9895	0.993	0.9863
CEP104	340	AT	7			0	1	0.1105	0.0169	0	0.0093	0.0262	0	0.0223	0	0.035	0.008	0.0193	0	0	0.0091	0	0.0236	0	0	0	0	0	0.0554	0	0.0295	0	0.0156	0.0149	0	0.0221	0.0137	0.0236	0	0.0166	0.0245	0	0	0	0.0363	0.0207	0.0105	0.007	0.0137
DFFB	346	ES	5	4.3	6	0	0.82	1	0.2064		0.4375		0.16	0.3613		0.2105	0.325		0.4194		0.3478	0.093	0.25	0.2105		0.4156	0.4706			0.4944	0.5	0.449	0.1391	0.5424		0.3571	0.2921	0.5909	0.4375	0.9323	0.407			0.2105		0.4156		0.1781	0.2286
AJAP1	352	AT	6			0	0.8509	0.9385	0.3045	0	0	0.5206	0.371	0.8129	0.4979		0	0	0			0.8291	0	0.7601	0	0	0.7917	0.6197	0.6952	0.4403	0	0	0.5582	0.3614	0.6787		0.7484	0.2788	0.6746	0.3519	0.638	0	0.1556	0	0.8358	0.8508	0.7529	0.7355	0.3049
AJAP1	353	AT	7			0	0.8509	0.9385	0.3045	1	1	0.4794	0.629	0.1871	0.5021		1	1	1			0.1709	1	0.2399	1	1	0.2083	0.3803	0.3048	0.5597	1	1	0.4418	0.6386	0.3213		0.2516	0.7212	0.3254	0.6481	0.362	1	0.8444	1	0.1642	0.1492	0.2471	0.2645	0.6951
NPHP4	355	ES	20	19	21	0	0.8218	0.6661	0.0825		0.036		0.0463	0.1149		0.0294	0		0.0494					0		0.0789	0.0389		0.0572	0.0263		0.0463	0.0463	0.0159	0.0198	0.0486	0.0154	0.154	0	0.0942	0.0159	0	0	0.0198		0.0216	0.2124	0.0628	0.0572
NPHP4	357	ES	00:13:14.100000	11	14.2	0	0.8382	0.5029	0.0623	1	1		1	1		1	1	1	1		1		1	1		1	1			1	1	1		1		1	1	1	1	1	1	1	1	1		0.7303	1	0.8161	1
NPHP4	358	ES	12:13:00	11	14.2	0	0.8691	0.3876	0.0572		1		1	1	0.9159		1	1	1					1		1	1		1	1		1	0.8842	1	1	1	1	1	1	1	1		1	1	1		1	0.8569	1
NPHP4	359	ES	7	6	8	0	0.9491	0.4535	0.0551		1		1	0.906	1	1	1	1	1		1	1	1	1		1	0.9747		1	1	1		0.9094	1	1	1	1	1	1	1	0.9711	1	1	1		1	1	1	1
KCNAB2	360	AP	2			0	0.9727	0.9834	0.1861	0.1684	0.6932		0.0679	0.3544	0.3112	0.2481	0.2696	0.3168	0.1639		0.1642	0.238	0.167	0.2671	0.0998	0.4349	0.6897	0.2021	0.231	0.393	0.8453	0.0679	0.1952	0.5223	0.2671	0.0573	0.3912	0.2116	0.2818	0.1701	0.5789	0.3961	0.3241	0.1341		0.0641	0.296	0.1143	0.116
KCNAB2	361	AP	3			0	0.9727	0.9639	0.1953	0.8316	0.3068		0.9321	0.6309	0.6888	0.6807	0.6411	0.6832	0.8288		0.7886	0.762	0.7638	0.7329	0.9002	0.5115	0.2212	0.5547	0.7396	0.5393	0.1547	0.9321	0.7906	0.4777	0.7329	0.9427	0.576	0.719	0.7182	0.5705	0.4211	0.6039	0.6759	0.8659		0.9236	0.704	0.8616	0.884
KCNAB2	362	AP	7			0	0.9727	0.1169	0.0145	0	0		0	0.0146	0	0	0.0274	0	0		0	0	0.0213	0	0	0	0.0274	0	0.0294	0	0	0	0.0142	0	0	0	0	0	0	0.1155	0	0	0	0		0.0122	0	0	0
KCNAB2	363	AP	4			0	0.9727	0.1439	0.0103	0	0		0	0	0	0	0	0	0.0073		0	0	0	0	0	0	0	0.0342	0	0	0	0	0	0	0	0	0	0	0	0.1439	0	0	0	0		0	0	0	0
KCNAB2	364	AP	1			0	0.9727	0.5298	0.0457	0	0		0	0	0	0.0712	0.0619	0	0		0.0471	0	0.0479	0	0	0.0535	0.0617	0.2089	0	0.0677	0	0	0	0	0	0	0.0329	0.0694	0	0	0	0	0	0		0	0	0.0241	0
KCNAB2	367	RI	22.2	22.1	22.3	0	0.9927	0.6574	0.1088	0.0413	0.1846	0.0756	0.0469	0.1587	0.0257	0.0536	0.1167	0.0736	0.2061		0.0702	0.1167	0.2464	0.1167	0.0075	0.0153	0.0778	0.1936	0.1432	0.0791	0.06	0.1522	0.1004	0.0885	0.0343	0.0956	0.1898	0.1934	0.1612	0.3614	0.0675	0.0332	0.008	0.0275	0.1334	0.0517	0.1371	0.1218	0.179
KCNAB2	368	ES	16	15	17	0	0.9218	0.1088	0.0199	0	0.0234		0	0.0243	0.0694	0	0.0296	0.0732	0.015		0		0.0458	0.0157	0	0	0.0138	0	0.0341	0.0403	0.0252	0.0186	0.0491		0.0341	0.0262	0.0183	0	0.0226	0	0.0197	0.0552	0.0839	0.0296		0.0333	0	0.0219	0
KCNAB2	370	ES	13:14:15:17:18:19:21:22.1:22.2:22.3	12	22.4	0	0.9364	0.8031	0.0651		1	0.2653	1	1		1	1	1	1		1	1	1	1			1	1	1	1	1	1	1			1	1	1	1	1	1	1		1	1	0.6646	1	1	1
KCNAB2	372	ES	13:14:15:17:18:19:21:22.1:22.3	12	22.4	0	1	0.0522	0.0045	1	1	0.9478	1	1	1	1	1	1	1	1	1	1	1	1	1	1	1	1	1	1	1	1	1	1	1	1	1	1	1	1	1	1	1	1	1	0.9853	1	1	1
KCNAB2	374	ES	6	5	9	0	0.9073	0.9118	0.133	0.2273	0.5074	0.4901	0.3041	0.2556	0.5917	0.4856	0.314	0.4397	0.3925	0.5336	0.3062		0.314	0.4184	0.3639	0.3972	0.3874	0.1027	0.4358	0.5458	0.329	0.3863	0.3925		0.2089	0.6578	0.4071	0.5682	0.2741	0.5074	0.2593	0.3597	0.3399	0.2654		0.3003	0.3819	0.4994	0.3235
RPL22	377	AP	3.1			0	1	0	0	0	0	0	0	0	0	0	0	0	0	0	0	0	0	0	0	0	0	0	0	0	0	0	0	0	0	0	0	0	0	0	0	0	0	0	0	0	0	0	0
RPL22	378	AP	1			0	1	0.0984	0.0048	0.0003	0.002	0.0015	0.0014	0.0029	0.0006	0.0018	0.0046	0.0039	0.0034	0.0008	0.001	0.0008	0.0039	0.0026	0.001	0.0013	0.0005	0.0024	0.0035	0.0014	0.001	0.0018	0.0015	0.0036	0.002	0.0018	0.0023	0.0031	0.0022	0.0007	0.0011	0.0057	0.0003	0.0094	0.0016	0.0018	0.0025	0.0013	0.0018
RPL22	379	AP	2			0	1	0.0984	0.0048	0.9997	0.998	0.9985	0.9986	0.9971	0.9994	0.9982	0.9954	0.9961	0.9966	0.9992	0.999	0.9992	0.9961	0.9974	0.999	0.9987	0.9995	0.9976	0.9965	0.9986	0.999	0.9982	0.9985	0.9964	0.998	0.9982	0.9977	0.9969	0.9978	0.9993	0.9989	0.9943	0.9997	0.9906	0.9984	0.9982	0.9975	0.9987	0.9982
RPL22	380	AT	6			0	1	0.0022	0.0002	0	0	0.0005	0	0.0003	0	0	0	0	0.0004	0	0.0005	0	0	0.0003	0	0	0	0	0	0	0	0.0009	0	0	0.0004	0.0002	0	0.0004	0	0	0.0003	0	0	0	0	0	0.0004	0	0
RPL22	381	AT	5			0	1	0.0022	0.0002	1	1	0.9995	1	0.9997	1	1	1	1	0.9996	1	0.9995	1	1	0.9997	1	1	1	1	1	1	1	0.9991	1	1	0.9996	0.9998	1	0.9996	1	1	0.9997	1	1	1	1	1	0.9996	1	1
RNF207	382	ES	11:12:00	10	13	0	0.8309	0.2868	0.0413		1			1	1		1	1	1		1		1	1		1	1	1	1	1		1	1	1	1	1	1	1	1		1	1			1	1	1	1	1
ICMT	385	ES	03:04:00	2	5	0	0.9982	0.7119	0.1104	0.6205	0.8694	0.769	0.5664	0.628	0.9064	0.9503	0.8644	0.7237	0.9054	0.8171	0.784	0.8957	0.7437	0.9311	0.8739	0.972	0.5977	0.9332	0.8133	0.7867	0.7773	0.693	0.9155	0.7481	0.7889	0.7301	0.7697	0.7693	0.787	0.641	0.7034	0.861	0.551	0.8196	0.7169	0.8234	0.8825	0.8569	0.7478
ICMT	386	ES	4	2	5	0	1	0.2164	0.0342	0.8831	0.9665	0.9298	0.8584	0.9451	0.9679	0.9776	0.9464	0.9148	0.9743	0.9662	0.9132	0.9697	0.9265	0.9754	0.988	0.99	0.8951	0.9707	0.9554	0.9593	0.9429	0.9245	0.9781	0.9502	0.9437	0.8842	0.9133	0.9112	0.9593	0.9252	0.8793	0.9659	0.8356	0.9367	0.9123	0.9674	0.9496	0.9659	0.9159
ICMT	387	ES	3	2	4	0	1	0.4512	0.0712	0.2118	0.218	0.2285	0.2131	0.1046	0.2777	0.3377	0.2996	0.2287	0.2289	0.1615	0.2926	0.2395	0.2189	0.2889	0.0951	0.2885	0.1738	0.3308	0.1971	0.1601	0.2025	0.1791	0.2194	0.1606	0.2097	0.2958	0.2739	0.2739	0.1575	0.1481	0.2749	0.2132	0.2199	0.2663	0.2231	0.1599	0.3192	0.1955	0.2463
ACOT7	388	AP	3			0	1	0.1726	0.0199	0	0.018	0	0	0.0406	0	0	0.0145	0.0286	0	0.1369	0	0	0	0.0113	0	0	0.0232	0.017	0	0	0	0.007	0	0	0	0	0	0	0	0.0461	0.0055	0.0225	0.0141	0	0	0	0	0.0138	0
ACOT7	389	AP	1.1			0	1	0.9135	0.2141	0.4248	0.2645	0.4003	0.0851	0.3177	0.1631	0.7406	0.6566	0.3618	0.8566	0.3103	0.8388	0.6638	0.8469	0.4241	0.649	0.4179	0.7559	0.4062	0.2252	0.3716	0.6703	0.2209	0.4996	0.604	0.4168	0.8615	0.8928	0.8443	0.4554	0.6485	0.2404	0.7188	0.5817	0.6	0.6304	0.2615	0.1482	0.4586	0.6673
ACOT7	390	AP	4			0	1	0.8143	0.1572	0.0415	0.0117	0.2779	0.2759	0.1103	0.0328	0.1408	0.0377	0.0279	0.0762	0.312	0.091	0.0174	0.0315	0.0589	0.2318	0.0528	0.0227	0.1328	0.0269	0.0121	0	0.2632	0.0332	0.338	0.0094	0.0071	0.0323	0.0642	0.3595	0.1201	0.0555	0.0661	0.0415	0.0699	0.1012	0.0732	0.0052	0.2315	0.0869
ACOT7	391	AP	2			0	1	0.9461	0.2517	0.5337	0.7058	0.3218	0.6389	0.5313	0.8041	0.1186	0.2912	0.5817	0.0672	0.2408	0.0702	0.3188	0.1216	0.5057	0.1193	0.5294	0.1982	0.444	0.7479	0.6163	0.3297	0.5089	0.4672	0.058	0.5738	0.1314	0.0749	0.0915	0.185	0.1854	0.6986	0.1926	0.3627	0.3301	0.2684	0.6653	0.8466	0.2961	0.2459
ACOT7	392	AT	10			0	1	0.2716	0.0371	0.0411	0.0444	0.0391	0.0243	0.0583	0.0659	0.0157	0.0344	0.0541	0.069	0.0181	0.0209	0.0042	0.1323	0.0178	0.0532	0.1655	0.0489	0.0209	0.0506	0.0251	0.0361	0.0445	0.0518	0.1974	0.0505	0.0431	0.0393	0.0276	0.1752	0.1032	0.0141	0.0274	0.0267	0.0097	0.0396	0.0415	0.0366	0.038	0.0918
ACOT7	393	AT	14			0	1	0.2716	0.0371	0.9589	0.9556	0.9609	0.9757	0.9417	0.9341	0.9843	0.9656	0.9459	0.931	0.9819	0.9791	0.9958	0.8677	0.9822	0.9468	0.8346	0.9511	0.9791	0.9494	0.9749	0.9639	0.9555	0.9482	0.8026	0.9495	0.9569	0.9607	0.9724	0.8248	0.8968	0.9859	0.9726	0.9733	0.9903	0.9604	0.9585	0.9634	0.962	0.9082
ACOT7	395	ES	12.1:12.2	11	13	0	1	0.0481	0.0057	0	0	0	0.0076	0	0	0	0	0	0	0	0	0	0	0	0	0	0.0005	0.0043	0	0	0	0.0021	0.0017	0	0.0018	0	0	0.0014	0.005	0.01	0.0009	0	0	0	0	0	0	0	0
ACOT7	396	ES	12.2	11	13	0	1	0.0163	0.0016	0	0	0	0	0	0	0	0	0	0	0	0	0	0	0	0	0	0.0008	0	0	0	0	0.0037	0.0027	0	0	0	0	0	0	0	0	0	0	0	0	0	0	0	0
ACOT7	397	ES	1.2:5	1.1	6	0	0.9982	0.0131	0.0006	1	1		1	1	1	1	1	1	1	1	1	1	1	1	1	1	1	1	1	1	1	1	1	1	1	1	1	1	1	1	1	1	1	1	1	1	1	1	1
HES2	400	AT	4.3			0	1	0.5385	0.1122	0.8307	0.7665	0.8532	0.7783	0.6179	0.6332	0.6708	0.7427	0.6812	0.6599	0.6719	0.8989	0.5174	0.7208	0.68	0.6685	0.8734	0.7672	0.9109	0.6825	0.6978	0.7282	0.7358	0.7826	0.7523	0.8943	0.8938	0.8024	0.732	0.7754	0.5527	0.8064	0.8091	0.8549	0.6507	0.7815	0.7822	0.6809	0.8388	0.781
HES2	401	AT	5			0	1	0.5385	0.1122	0.1693	0.2335	0.1468	0.2217	0.3821	0.3668	0.3292	0.2573	0.3188	0.3401	0.3281	0.1011	0.4826	0.2792	0.32	0.3315	0.1266	0.2328	0.0891	0.3175	0.3022	0.2718	0.2642	0.2174	0.2477	0.1057	0.1062	0.1976	0.268	0.2246	0.4473	0.1936	0.1909	0.1451	0.3493	0.2185	0.2178	0.3191	0.1612	0.219
ESPN	405	AP	1			0	0.76	1	0.2652					0.3391	0.2294	0.884	0.8019	0.4168	0.5436		0.6442	1	0.3227	0.6558		0.9091	0.279	0.6251	0.4168	0.8511	0.6251	0.7448	0.5117		0.9336	0.9373	0.7364	0.6251	0.2175	0.3438	0.2272	0.8696	0.6076		0.397	0.6136	0.8397	0.6153	0.8265
ESPN	406	AP	8			0	0.76	1	0.2652					0.6609	0.7706	0.116	0.1981	0.5832	0.4564		0.3558	0	0.6773	0.3442		0.0909	0.721	0.3749	0.5832	0.1489	0.3749	0.2552	0.4883		0.0664	0.0627	0.2636	0.3749	0.7825	0.6562	0.7728	0.1304	0.3924		0.603	0.3864	0.1603	0.3847	0.1735
TNFRSF25	409	RI	6.4	6.3	6.5	0	0.96	0.2161	0.0152	1	1			1		1	1	1	0.9809		1	1	1	1		0.9639	1	1	1	1	1	1	1	1	0.9439	1	0.9937	1	1	1	1	1	0.9192	1	1	1	1	1	1
TNFRSF25	410	RI	6.3:6.4	6.2	6.5	0	0.9709	0.8083	0.1325	0.9385	0.9449			0.839		0.8021	0.6382	0.7512	0.8684		0.8512	0.9253	0.8799	0.6959		0.792	0.8819	0.8003	0.8422	0.7409	0.9513	0.8288	0.6137	0.7275	0.567	0.876	0.897	0.743	0.8764	0.5697	0.7317	0.7963	0.7977	0.8438	0.7415	0.7265	0.7866	0.7924	0.7814
TNFRSF25	412	ES	6.3:6.4:6.5:7.1	6.2	7.2	0	0.9745	0.4911	0.0332	1	1		1	0.9715	1	1	0.9157	1	0.9796		1	0.9191	1	0.9594	1	1	1	1	1	1	1	1	1	1	1	1	1	0.9908	1	1	1	1	0.9362	1	0.9864	1	0.9804	1	1
TNFRSF25	414	ES	6.5:7.1	6.2	7.2	0	0.8382	0.2892	0.0494					0.872		1	0.8754		0.8835		1		1	0.9146		1	1	1	1	1		1	1	1	1	1	1	0.9754	1	1	1	1	0.8087		0.9636	1	0.9386	1	1
TNFRSF25	415	ES	6.1:6.2:6.3:6.4:6.5:7.1	5	7.2	0	0.8891	0.4851	0.0715	1	1			0.8869		1	0.8462	1	1		1	1	0.878	1		1	1	1	1	1	1	1	1	1	1	1	1	1	1		1	1	1	0.7817	1	1	0.9453	1	1
TNFRSF25	416	ES	6.2:6.3:6.4:6.5:7.1	5	7.2	0	0.9473	0.4308	0.0463	1	1		1	0.8901	1	1	0.9622	1	1		1	1	0.9315	1	1	1	1	1	1	1	1	1	1	1	1	1	1	1	1	1	1	1	1	0.882	1	1	0.971	1	1
TNFRSF25	420	ES	6.2:6.5:7.1	5	7.2	0	0.7855	0.4981	0.0812					0.6464	1	1	0.9579				1		0.7235	1		1	1	1				1	1	1	1	1	1	1	1	1	1	1			1	1	0.9218	1	1
TNFRSF25	424	AA	6.1	5	6.2	0	0.8818	1	0.1609	0.4772	0.552			0.5121			0.182	0.5066	0.6725		0.5066	0.5349	0.3584	0.5349		0.5635	0.6095	0.3018	0.552		0.4964	0.451	0.2674	0.451	0.3392	0.5804	0.5687	0.3261	0.2699	0.1411	0.3946	0.422	0.5066		0.573	0.162	0.3506	0.6419	0.3301
TNFRSF25	425	AA	6.1:6.2:6.3:6.4	5	6.5	0	0.8818	0.8134	0.1303	0.8806	0.9462			0.9231		0.6458	0.777	1	0.9426		1	1	0.9548	1		0.9317	0.964	0.8948	1	0.6413	1	0.9325	1	0.7972	0.8458	0.9563	0.9886	0.9348	0.9344		0.9353	1	1	1	0.9565	0.7516	1	0.9626	0.8834
TNFRSF25	426	AA	6.2:6.3:6.4	5	6.5	0	0.94	0.4682	0.0801	0.8951	0.9393			0.925	1	0.8584	0.9412	1	0.8962		1	1	0.9754	1	1	0.9179	0.9484	0.9541	1	0.7041	1	0.9466	1	0.8391	0.9184	0.9438	0.9859	0.9686	0.9764	1	0.9598	1	1	1	0.9478	0.9412	1	0.9388	0.9404
TNFRSF25	431	ES	5:6.1:6.2:6.3:6.4:6.5:7.1:7.2	4	8	0	0.8727	0.1949	0.0134	1	1			1		1	1	1	1		1	1	1	1		1	1	1	1	1	1	1	1	1	1	1	1	1	1		1	1	1	1	1		1	1	1
TNFRSF25	432	ES	5:6.2:6.3:6.4:6.5:7.1:7.2	4	8	0	0.9618	0.1022	0.0057	1	1		1	1	1	1	1	1	1		1	1	1	1	1	1	1	1	1	1	1	1	1	1	1	1	1	1	1	1	1	1	1	1	1	1	1	1	1
TNFRSF25	436	ES	5:6.2:6.5:7.1:7.2	4	8	0	0.8964	0.1815	0.0093				1	1	1	1	1	1	1		1		1	1		1	1	1	1	1		1	1	1	1	1	1	1	1	1	1	1	1	1	1	1	1	1	1
TNFRSF25	441	ES	3:4:5:6.1:6.2:6.3:6.4:6.5:7.1	2	7.2	0	0.82	0.6549	0.0625	1	1			1		1	1	1	1		1	1	1	1		1	1	1	1	1		1	1	1		1	1	1	1		1	1	1	1	1		1	1	1
TNFRSF25	443	ES	3:4:5:6.2:6.3:6.4:6.5:7.1	2	7.2	0	0.9636	0.3664	0.0217	1	1		1	1	1	1	1	1	1		1	1	1	1	1	1	1	1	1	1	1	1	1	1	0.8564	1	1	1	1	1	1	1	1	1	1	1	1	1	1
TNFRSF25	451	ES	3:4:5:6.2:6.5:7.1	2	7.2	0	0.94	0.4621	0.0424	1	1		1	1	1	1	1	1	1	1	1		1	1		1	1	1	1	1	1	1	1	1	0.9009	1	1	1	1	1	1	1	1	1	1	1	1	1	1
TNFRSF25	461	ES	3	2	4	0	0.9891	0.1595	0.0186	1	1		1	1	1	1	1	1	0.9768		1	1	0.9793	1	1	1	1	0.9824	1	1	1	1	1	1	1	1	0.9909	0.9907	1	1	0.9773	1	1	1	1	1	1	1	1
PLEKHG5	462	AP	1			0	0.8909	0.868	0.1378	0.205	0		0.2917	0.6522		0	0		0		0	0	0	0.0222		0	0.0185	0.0548		0	0	0	0	0	0.0243	0	0	0.0165	0.0653	0.1844	0.1851	0.3889	0		0.2033		0.0171	0	0
PLEKHG5	463	AP	3			0	0.8909	0.1831	0.0248	0	0		0	0		0	0		0.0591		0	0	0.0289	0		0.0804	0.0333	0.0282		0	0	0.1048	0	0.0172	0	0	0	0	0	0.1022	0	0.1001	0		0.0642		0.0205	0.0258	0
PLEKHG5	464	AP	5			0	0.8909	0.5645	0.107	0.3089	0.0397		0	0		0.0593	0.093		0.0988		0	0	0	0.2004		0	0.1113	0		0.2771	0.1524	0	0.1037	0	0.2051	0	0.0344	0.0249	0	0.0855	0.1693	0	0.0342		0.1353		0.0687	0.3039	0.0619
PLEKHG5	465	AP	8			0	0.8909	1	0.2044	0	0.0683		0.1119	0		0.1019	0.0799		0		0.2719	0.0812	0.1938	0.1148		0.1542	0.0956	0.2161		0.1058	0.2619	0.2511	0.1188	0.3462	0.0504	0.0548	0.197	0.2138	0.2535	0.049	0.111	0.0959	0.0979		0.0154		0.0394	0.074	0.1418
PLEKHG5	466	AP	4.1			0	0.8909	0.5592	0.0879	0.1964	0.0253		0.1242	0.026		0	0.1182		0.1256		0.0754	0	0.1229	0		0	0.0354	0.2099		0.0587	0.0969	0.1672	0	0.0183	0.149	0.0608	0.0656	0.0633	0	0.1087	0.074	0	0		0.1367		0.1748	0.0274	0.0394
PLEKHG5	467	AP	6			0	0.8909	1	0.2214	0.1867	0.8403		0.4722	0.3217		0.7166	0.3933		0.7165		0.5736	0.2571	0.5256	0.5249		0.488	0.706	0.1995		0.5583	0.2763	0.4768	0.6265	0.3653	0.2656	0.7511	0.5612	0.466	0.416	0.4133	0.2266	0.3035	0.6815		0.3734		0.5607	0.3908	0.3741
PLEKHG5	468	AP	7			0	0.8909	0.671	0.1035	0.103	0.0265		0	0		0.079	0.2479		0		0.0791	0.6617	0.1288	0.0891		0.1794	0	0.1886		0	0.1016	0	0	0.211	0.1562	0.0637	0.0917	0.2156	0.2294	0.057	0.1208	0.1116	0.1367		0.0717		0.0687	0.1151	0.2476
PLEKHG5	469	AP	2			0	0.8909	0.423	0.0618	0	0		0	0		0.0432	0.0677		0		0	0	0	0.0487		0.098	0	0.103		0	0.111	0	0.151	0.0419	0.1494	0.0696	0.0501	0	0.0358	0	0.1133	0	0.0498		0		0.0501	0.0629	0.1353
PLEKHG5	472	RI	27.2	27.1	27.3	0	0.9982	0.0855	0.0135	1	1		0.9609	1	1	1	0.9924	0.9781	1	1	0.9645	1	0.9855	0.9454	1	0.9818	1	0.9875	1	1	1	1	1	0.9885	1	1	0.991	0.9955	1	1	0.971	0.9883	1	0.9744	1	1	0.9845	1	1
PLEKHG5	473	AA	27.1:27.2:27.3	26	27.4	0	0.9982	0.2023	0.0139	1	1		1	0.9751	0.8913	1	0.9923	1	0.987	1	1	1	1	1	1	1	1	0.982	0.9727	1	1	1	1	0.9795	0.9705	1	0.9848	0.987	1	1	0.9951	1	0.9908	1	1	1	1	1	1
KLHL21	477	AP	1			0	0.9982	0.1962	0.0113	0	0		0	0	0	0	0	0	0	0	0	0	0	0	0	0	0	0	0	0	0	0	0	0	0	0	0.0103	0	0	0	0	0	0	0	0	0	0	0	0
KLHL21	478	AP	2			0	0.9982	0.1962	0.0113	1	1		1	1	1	1	1	1	1	1	1	1	1	1	1	1	1	1	1	1	1	1	1	1	1	1	0.9897	1	1	1	1	1	1	1	1	1	1	1	1
KLHL21	481	RI	4.2	4.1	4.3	0	1	0.4389	0.0724	1	0.869	0.7583	1	1	1	0.8798	0.936	1	0.9508	1	0.8167	1	1	1	1	0.8997	0.8342	0.947	1	0.7341	1	0.962	0.917	0.937	0.8576	0.874	0.9498	1	0.9576	1	0.9333	0.8643	0.7631	0.9084	1	0.7508	1	0.943	1
KLHL21	482	RI	4.2:4.3	4.1	4.4	0	1	0.6959	0.1183	0.3474	0.1962	0.3125	0.092	0.2361	0.0993	0.1394	0.1623	0.0865	0.2619	0.1112	0.1431	0.0869	0.4275	0.1433	0.0547	0.0869	0.1186	0.2144	0.2652	0.1531	0.1463	0.1954	0.1296	0.1651	0.1905	0.0908	0.2253	0.3869	0.1558	0.4282	0.1935	0.0945	0.1096	0.1548	0.4067	0.1942	0.2487	0.1746	0.1717
KLHL21	483	AA	4.3	4.1	4.4	0	0.9945	0.1812	0.0183	0	0.0301	0.0812	0	0	0	0.0185	0.0104	0	0.0143	0	0.0209	0	0	0	0	0.0076	0.0238	0.0143	0	0.0581	0	0.0099	0.0081	0.0129	0.0347	0.0133	0.0116	0	0.0054	0	0.0128	0.0082	0.0209	0.0075	0	0.0662	0	0.0125	0
THAP3	486	AT	7			0	1	0.456	0.0652	0.2044	0.3526	0.1022	0.2445	0.2344	0.2393	0.3098	0.3527	0.2601	0.3555	0.2049	0.3084	0.2867	0.3644	0.322	0.1888	0.3071	0.3559	0.4356	0.3141	0.2768	0.3015	0.3356	0.2892	0.3423	0.2989	0.2968	0.3818	0.3949	0.324	0.303	0.329	0.3549	0.3527	0.4988	0.355	0.2974	0.3821	0.3448	0.378
THAP3	487	AT	6			0	1	0.456	0.0652	0.7956	0.6474	0.8978	0.7555	0.7656	0.7607	0.6902	0.6473	0.7399	0.6445	0.7951	0.6916	0.7133	0.6356	0.678	0.8112	0.6929	0.6441	0.5644	0.6859	0.7232	0.6985	0.6644	0.7108	0.6577	0.7011	0.7032	0.6182	0.6051	0.676	0.697	0.671	0.6451	0.6473	0.5012	0.645	0.7026	0.6179	0.6552	0.622
THAP3	488	AA	5.1	4.2	5.2	0	0.9964	0.212	0.028	0	0	0	0	0.0149	0	0.0195	0	0	0	0	0.0221	0	0.0562	0.0619	0	0.0445	0	0.0227	0	0.0771	0.019	0	0	0.0256	0	0.0083	0.0445	0.0157	0	0.0215	0	0.0138	0	0	0.1453	0	0.0433	0.1231	0.1324
THAP3	489	AA	4.1	3	4.2	0	0.9982	0.4699	0.0633	0.8252	0.8629	0.8971	0.8888	0.8523	0.8714	0.8086	0.8592	0.8741	0.8714	0.7841	0.6992	0.8784	0.9375	0.9159	0.8459	0.7992	0.9105	0.9237	0.8532	0.8572	0.8478	0.9735	0.8247	0.8888	0.8489	0.8857	0.8642	0.9064	0.9375	0.9142	0.7287	0.8616	0.8682	0.8288	0.8286	0.9509	0.8099	0.8645	0.9457
DNAJC11	491	AP	2			0	1	0.0316	0.0026	0	0	0	0	0	0	0	0	0	0	0	0	0	0	0	0	0	0	0	0	0	0	0	0	0	0	0.0102	0	0	0	0	0	0	0	0	0	0	0	0	0
DNAJC11	492	AP	1			0	1	0.0316	0.0026	1	1	1	1	1	1	1	1	1	1	1	1	1	1	1	1	1	1	1	1	1	1	1	1	1	1	0.9898	1	1	1	1	1	1	1	1	1	1	1	1	1
DNAJC11	495	ES	12	11	13	0	1	0.131	0.0117	0.9651	1	0.9886	1	0.9788	0.9833	0.9941	0.9835	0.9694	0.9934	1	0.9887	1	1	0.986	1	0.9894	0.997	0.9841	0.9556	0.994	0.992	1	0.9869	0.9905	0.9937	0.9882	0.9934	0.9951	0.9902	0.9875	0.978	0.9899	1	0.984	1	0.971	0.9947	0.9923	0.9897
DNAJC11	496	ES	9.2:10:11:12:13:14:15:16:17.1	9.1	17.2	0	1	0.0562	0.0089	1	0.993	1	0.9641	0.9921	0.9893	0.9874	1	0.9438	1	0.949	0.9885	0.9912	0.984	0.986	1	0.9887	0.9915	1	0.9911	0.9929	1	0.9931	0.9852	0.9946	0.9929	0.9957	0.995	0.9953	0.9948	0.9873	0.9812	0.9701	0.9879	0.9909	1	0.9921	0.9804	0.9925	0.9902
DNAJC11	497	ES	9.2:10:11:13:14:15:16:17.1	9.1	17.2	0	0.7836	0.804	0.2111	1		1		0.7963	0.681	0.4411	1	0.3898	1		0.6287			0.6058		0.5859	0.332	1	0.9	0.5585	1		0.5656	0.725	0.5676	0.8117	0.6639	0.5945	0.7473	0.6089	0.6581	0.3703		0.7679		0.8585	0.3306	0.6351	0.6266
DNAJC11	498	ES	4	3	5	0	1	0.0756	0.0096	1	0.9684	0.9814	0.9645	0.9886	1	0.9901	0.9896	1	1	1	0.9786	1	0.9805	1	0.9808	0.9918	0.9882	1	1	1	1	1	1	1	1	1	0.997	0.9904	1	0.9847	0.9904	0.9779	0.9919	0.9894	0.9769	1	1	1	0.9839
CAMTA1	501	AT	26			0	1	0.2821	0.0331	0.0353	0.0306	0.0182	0.0826	0.0343	0.0089	0.007	0.0316	0.0088	0.0224	0.0236	0.0462	0.0066	0.0394	0.0079	0.0196	0.0066	0.025	0.0072	0.0469	0.0467	0.0024	0.0448	0.0086	0.0163	0.0104	0.0125	0.0176	0.0332	0.0574	0.0291	0.0417	0.0057	0.0597	0.008	0.0373	0.0232	0.0539	0.0446	0.0565
CAMTA1	502	AT	5			0	1	0.4016	0.0633	0.6846	0.8347	0.8341	0.6914	0.6215	0.8258	0.7723	0.6108	0.7972	0.6984	0.8266	0.7684	0.8909	0.774	0.7992	0.7861	0.7579	0.7383	0.8776	0.7176	0.7457	0.7772	0.7585	0.7734	0.7589	0.8302	0.7494	0.7934	0.642	0.6784	0.7263	0.6918	0.8192	0.7498	0.7726	0.8947	0.7028	0.8693	0.7742	0.767
CAMTA1	503	AT	6			0	1	0.3793	0.0561	0.2801	0.1347	0.1477	0.226	0.3442	0.1653	0.2207	0.3576	0.194	0.2791	0.1498	0.1854	0.1025	0.1867	0.1929	0.1943	0.2355	0.2367	0.1152	0.2355	0.2076	0.2205	0.1967	0.218	0.2248	0.1594	0.2382	0.189	0.3248	0.2643	0.2447	0.2665	0.1751	0.1904	0.2194	0.068	0.2741	0.0767	0.1812	0.1766
CAMTA1	506	ME	2|3	1	4	0	1	0.0457	0.0076	0.0167	0	0.0067	0	0	0	0	0.004	0	0.0143	0	0.0049	0.0116	0.0037	0.0081	0.0457	0.0063	0.0054	0.0087	0.0102	0	0.021	0.0157	0	0.0083	0.0069	0.0053	0.0032	0	0.0132	0.012	0.0139	0.0055	0.0135	0	0.008	0.0343	0.0125	0	0
CAMTA1	507	ES	3	1	4	1	1	0.2995	0.0498	0.7806	0.8707	0.9106	0.723	0.8291	0.8509	0.859	0.8018	0.8318	0.768	0.8209	0.8575	0.8641	0.8054	0.7888	0.7825	0.8151	0.877	0.8967	0.8714	0.8552	0.8058	0.7888	0.8562	0.8675	0.9081	0.9588	0.8719	0.7824	0.7535	0.8296	0.728	0.8339	0.7696	0.871	0.7821	0.7887	0.9382	0.8498	0.8558
CAMTA1	508	ES	2	1	4	1	0.9982	0.2663	0.0358	0.057	0	0.064	0	0	0	0	0.0159	0	0.0459	0	0.0287	0.0692	0.0153	0.0297	0.1468	0.0271	0.0372	0.0708	0.0652	0	0.0817	0.0561	0	0.0518	0.0642	0.1112	0.0211	0	0.0394	0.0557	0.0364	0.0269	0.0436	0	0.028	0.1172	0.161	0	0
VAMP3	509	AP	1			0	1	0.4414	0.0731	0.8316	0.853	0.5911	0.8206	0.8651	0.913	0.927	0.8201	0.8823	0.7624	0.8848	0.7724	0.9423	0.7467	0.9036	0.8496	0.8801	0.7694	0.8038	0.8641	0.7393	0.8725	0.8425	0.8341	0.8916	0.8907	0.8644	0.7749	0.7193	0.8939	0.7328	0.7897	0.9094	0.8375	0.9338	0.8304	0.7772	0.887	0.9117	0.7646
VAMP3	510	AP	2			0	1	0.4414	0.0731	0.1684	0.147	0.4089	0.1794	0.1349	0.087	0.073	0.1799	0.1177	0.2376	0.1152	0.2276	0.0577	0.2533	0.0964	0.1504	0.1199	0.2306	0.1962	0.1359	0.2607	0.1275	0.1575	0.1659	0.1084	0.1093	0.1356	0.2251	0.2807	0.1061	0.2672	0.2103	0.0906	0.1625	0.0662	0.1696	0.2228	0.113	0.0883	0.2354
PER3	513	AT	10.2			0	1	0.1458	0.0167	0	0	0	0	0.0179	0	0	0.0071	0	0.0314	0	0	0	0	0	0	0	0.0037	0.0109	0.0566	0	0.0215	0.0091	0	0	0	0	0.0101	0.0055	0	0	0	0	0	0	0	0.0396	0.037	0	0.019
PER3	514	AT	22			0	1	0.1458	0.0167	1	1	1	1	0.9821	1	1	0.9929	1	0.9686	1	1	1	1	1	1	1	0.9963	0.9891	0.9434	1	0.9785	0.9909	1	1	1	1	0.9899	0.9945	1	1	1	1	1	1	1	0.9604	0.963	1	0.981
PER3	515	AA	19.1	18	19.2	0	0.7509	0.7741	0.1299	0.3262	0.4365	0.5804	0.5784	0.703			0.6595		0.9457		0.5137	0.3923	0.6289	0.492			0.5855	0.6854		0.6595	0.601	0.5305	0.6932	0.6289	0.6992	0.8288	0.5923	0.5018	0.3923		0.6237		0.492	0.6595	0.4916			0.5333	0.5137
UTS2	520	AT	5.2			0	0.8782	0.8391	0.1754	0	0.3373	0.5167	0	0.3503	0.2891	0.0729	0.3783	0.0534	0.2166	0.4657	0	0.1293		0.3483	0.1382			0.3827	0.0932	0.0318	0	0.2385	0.0477	0.1603	0	0.1908		0.4143	0.2862	0.4143	0.5022	0.3738	0.445	0.0445	0.2517	0.1354	0.0326	0.3245	0.3641
UTS2	521	AT	7			0	0.8782	0.8391	0.1754	1	0.6627	0.4833	1	0.6497	0.7109	0.9271	0.6217	0.9466	0.7834	0.5343	1	0.8707		0.6517	0.8618			0.6173	0.9068	0.9682	1	0.7615	0.9523	0.8397	1	0.8092		0.5857	0.7138	0.5857	0.4978	0.6262	0.555	0.9555	0.7483	0.8646	0.9674	0.6755	0.6359
PARK7	523	AP	1.1			0	1	0.0279	0.0044	1	0.9904	1	0.9952	0.9945	0.9955	0.9986	0.9928	0.9989	0.9962	0.9984	0.9941	0.9955	0.9795	0.9989	0.9821	0.9981	0.9978	0.9932	0.9907	0.987	0.9986	0.9885	0.9952	0.9958	0.9913	0.999	0.9901	0.9922	0.9941	0.9896	0.9779	0.9967	0.9936	0.9987	0.9971	0.9854	0.9989	0.9977	0.9981
PARK7	524	AP	2.1			0	1	0.0279	0.0044	0	0.0096	0	0.0048	0.0055	0.0045	0.0014	0.0072	0.0011	0.0038	0.0016	0.0059	0.0045	0.0205	0.0011	0.0179	0.0019	0.0022	0.0068	0.0093	0.013	0.0014	0.0115	0.0048	0.0042	0.0087	0.001	0.0099	0.0078	0.0059	0.0104	0.0221	0.0033	0.0064	0.0013	0.0029	0.0146	0.0011	0.0023	0.0019
PARK7	526	ES	5	4	6	0	1	0.0081	0.0014	0.9971	0.9977	0.9991	0.9987	0.9952	0.9973	0.9982	0.9957	0.998	0.9974	0.996	0.9993	0.9985	0.9991	0.9982	0.9985	1	0.9962	0.9963	0.9964	0.9995	0.9986	0.9957	0.9981	0.9983	0.9982	0.9988	0.9989	0.9994	0.9945	1	0.9971	0.9978	0.9991	0.9972	0.9977	0.9961	0.9975	1	0.9984
PARK7	528	AD	1.2	1.1	3	0	1	0.5057	0.0882	0.5467	0.5686	0.3101	0.6346	0.5127	0.5332	0.5564	0.5751	0.3544	0.3585	0.4148	0.3423	0.4912	0.55	0.5573	0.5272	0.5681	0.3136	0.3719	0.4849	0.4207	0.4552	0.5641	0.5094	0.5775	0.6446	0.5433	0.4086	0.4459	0.436	0.4272	0.5017	0.5538	0.4936	0.4482	0.5736	0.5426	0.3553	0.5642	0.5331
ERRFI1	531	AT	3.4			0	1	0.0957	0.0105	1	0.9911	0.9945	0.9937	0.9872	0.9906	0.9947	0.9928	0.9917	0.9888	0.9893	0.9707	0.9833	0.9908	0.982	1	0.9821	0.9993	0.9958	0.9855	0.9975	0.9884	0.987	0.9936	0.9937	0.9971	0.9827	0.9879	0.9813	0.985	0.9624	0.9818	0.99	0.9955	0.9969	0.9948	0.9943	0.9917	0.9921	0.9872
ERRFI1	532	AT	4			0	1	0.0957	0.0105	0	0.0089	0.0055	0.0063	0.0128	0.0094	0.0053	0.0072	0.0083	0.0112	0.0107	0.0293	0.0167	0.0092	0.018	0	0.0179	0.0007	0.0042	0.0145	0.0025	0.0116	0.013	0.0064	0.0063	0.0029	0.0173	0.0121	0.0187	0.015	0.0376	0.0182	0.01	0.0045	0.0031	0.0052	0.0057	0.0083	0.0079	0.0128
ERRFI1	533	RI	3.3	3.2	3.4	0	1	0.8699	0.1579	0.5712	0.516	0.2128	0.0932	0.2328	0.1188	0.1591	0.2697	0.1586	0.2985	0.1953	0.2208	0.2038	0.3594	0.1419	0.1926	0.1464	0.2922	0.3175	0.4522	0.2555	0.1622	0.3661	0.2817	0.249	0.1538	0.1579	0.2989	0.4654	0.3126	0.1316	0.3122	0.2183	0.1263	0.091	0.6121	0.2411	0.2475	0.3139	0.1615
ERRFI1	534	AA	3.1:3.2:3.3	2	3.4	0	0.9109	0.9078	0.2723	0.8467	0.5629	0.4334	0.475	1	0.4036	0.4112	0.3903		1	1	0.1398	1	1		1		0.501	1	1	0.3566	0.602	0.8584	0.3939	0.2524	0.5987	0.6266	0.7472	0.6382	0.59	1	0.6793	0.4684	0.3469	1	0.9779	0.5479	0.3085	0.2661	0.5669
ERRFI1	535	AA	3.2:3.3	2	3.4	0	0.9964	0.6708	0.0925	0.8947	0.9349	0.8144	0.871	1	0.8271	0.8696	0.8043	0.8677	1	1	0.5312	1	1	1	1	1	0.8495	1	1	0.7675	0.945	0.9718	0.8908	0.9046	0.9254	0.9187	0.9404	0.877	0.9031	1	0.9215	0.8408	0.8516	1	0.9951	0.9216	0.8625	0.8829	0.9618
ERRFI1	536	ES	3.1:3.2	2	3.4	0	0.8382	0.709	0.135	0.8295	0.5846	0.7944	0.9137		0.8519	0.8125	0.6776		1	1	0.4143	1	1				0.7383	1	1	0.65	0.9153	0.9195	0.678	0.5252	0.905	0.9007	0.895	0.7001	0.7923	1	0.8747	0.8188	0.8269	1	0.9723	0.8174	0.6171	0.5566	0.8834
ERRFI1	537	ES	3.2	2	3.4	0	0.9945	0.2473	0.0291	0.8819	0.9397	0.9567	0.9875	1	0.9759	0.9763	0.9306	0.977	1	1	0.8306	1	1	1	1	1	0.9403	1	1	0.9165	0.9919	0.9847	0.9634	0.9687	0.9875	0.9839	0.9783	0.9036	0.961	1	0.9747	0.9642	0.9808	1	0.9938	0.9774	0.9575	0.9627	0.9932
ERRFI1	538	AA	3.1	2	3.2	0	0.9745	0.4053	0.0641	0.397	0.0865	0.1544	0.1221	0.1456	0.129	0.0978	0.1384	0.0244	0.2333	0.1957	0.1297	0.068	0.2808	0		0.0574	0.1557	0.0883	0.1243	0.1475	0.0836	0.1553	0.0759	0.0352	0.1102	0.1315	0.1617	0.2035	0.1368	0.4053	0.1586	0.1456	0.0872	0.0672	0.1872	0.0962	0.0686	0.0481	0.0511
RERE	541	AP	9			0	0.9891	1	0.1505	1	0.5342	0.7139	0.6961	0.1557	0.3689	0.5135	0.4486	0.4835	0.6437		0.2998	0.6708	0.4039	0.5901	0.5097	0.4741	0.4575	0.5211	0.4549	0.724	0.5572	0.2457	0.4597	0.2996	0.5145	0.2694	0.4122	0.3205	0.2933	0.3389	0.2365	0.3912	0.2749	0.4563	0.5124	0.2339	0.3452	0.4383	0.4123
RERE	543	AP	14			0	0.9891	0.7471	0.1264	0	0.3324	0.1333	0.13	0.155	0.2449	0.1095	0.2512	0.3094	0.1131		0.1866	0.3005	0.0953	0.2203	0.2537	0.1573	0.0923	0.2334	0.1359	0.0338	0.1189	0.5045	0.286	0.3635	0.1808	0.3772	0.1894	0.2792	0.3185	0.3163	0.2473	0.4173	0.2463	0.1947	0.2096	0.5434	0.3222	0.2391	0.2463
RERE	544	AP	1			0	0.9891	0.8901	0.1432	0	0.1335	0.1529	0.1739	0.6892	0.3862	0.377	0.3002	0.2071	0.2432		0.5136	0.0287	0.5008	0.1896	0.2365	0.3685	0.4502	0.2455	0.4092	0.2422	0.3239	0.2499	0.2543	0.3368	0.3046	0.3534	0.3984	0.4003	0.3882	0.3447	0.5162	0.1915	0.4788	0.349	0.2779	0.2226	0.3326	0.3226	0.3414
RERE	545	ES	18:19:20:21:22:23:24	17	25	0	1	0.0189	0.0011	1	1	1	1	1	1	1	1	1	1	1	1	1	1	1	1	1	1	1	1	1	1	1	1	1	1	1	1	1	1	1	1	1	1	1	1	1	1	1	1
RERE	546	ES	5	4	6	1	0.7709	0.4584	0.0722		0.8581	0.7786	0.6721	0.8211	0.802	0.8173	0.8016		0.8424				0.8522	0.7126	0.5677		0.9438		0.8388	0.611	0.9054	0.8971	0.7586	0.8159	0.8692	0.8159	0.7312	0.7143	0.8084		0.8059		0.8801			0.8491	0.8332		0.8433
CA6	548	AT	3			0	0.9818	0.9812	0.2514	1	1	0.23	0.7249	0.6904	0.2683	0.8949	1	1	0.6186		1	0.8502	0.5285	0.5412		0.5935	0.8169	0.8949	1	1	1	0.6699	0.2443	1	1	0.8098	1	0.2412	0.8733	0.9229	1	0.4932	1	0.7849	1	1	0.7087	0.4214	1
CA6	549	AT	10			0	0.9818	0.9278	0.2286	0	0	0.77	0.2751	0.3096	0.5734	0.1051	0	0	0.3814		0	0.1498	0.4715	0.4588		0.4065	0.1831	0.1051	0	0	0	0.1921	0.6573	0	0	0.1902	0	0.4576	0.1267	0.0771	0	0.5068	0	0.2151	0	0	0.2913	0.5786	0
CA6	550	AT	9			0	0.9818	0.5585	0.0651	0	0	0	0	0	0.1584	0	0	0	0		0	0	0	0		0	0	0	0	0	0	0.1379	0.0983	0	0	0	0	0.3012	0	0	0	0	0	0	0	0	0	0	0
SLC2A5	552	AP	1			0	0.8218	0.6633	0.0494	1	0.9122	1	1	0.9834	1	0.9541		0.9624	0.9778	0.8979	1	1	1	1	1	1	1	0.9438	1	1		0.9729	1		0.9729	1	1	1	0.9893	0.9193	0.9689	1	0.96	1	0.7053	1	1	1	1
SLC2A5	553	AP	4			0	0.8218	0.6633	0.0494	0	0.0878	0	0	0.0166	0	0.0459		0.0376	0.0222	0.1021	0	0	0	0	0	0	0	0.0562	0	0		0.0271	0		0.0271	0	0	0	0.0107	0.0807	0.0311	0	0.04	0	0.2947	0	0	0	0
SLC2A5	556	RI	6.2	6.1	6.3	0	0.8927	0.9971	0.14	0.0803	0.1115		0.0142	0.0565	0.02	0.0638	0.127	0.0077	0.0581		0.022	0.0587	0.1833	0.0803	0.0418	0.0179	0.0582	0.1295	0.092	0.0351	1	0.1435	0.0709		0.0254	0.1791	0.1406	0.3346	0.1332	0.046	0.0838	0.0077	0.0147	0.1153	0.2679	0.04	0.1585	0.0754	0.0909
SLC2A5	557	ES	02:03:00	1	5	0	0.9509	0.156	0.0142	1	1	1	0.9724	0.9721	1	1	1	1	1	1	1	1	1	1	1	1	1	1	1	1	1	1	1	1	1	1	1	1	0.9598	1	1	1	1	1	1	1	1	1	1
GPR157	558	ES	3	2	4	0	0.9618	0.6753	0.1328	0.6483	0.6158			0.5403	0.7528	0.6783	0.7195	0.9058	0.6579	0.3907	0.7426	0.5738	0.771	0.6866		0.7043	0.5983	0.5204	0.7062	0.3425	0.6158	0.5492	0.7286	0.8213	1	0.7937	0.7945	0.5045	0.6992	0.6951	0.6938	0.8568	0.6839	0.6917	0.6852	0.5581	0.8487	0.6852	0.5492
SPSB1	561	AP	3.1			0	0.9782	0.348	0.0475	0	0	0	0	0	0	0	0	0	0	0	0	0	0	0	0	0	0	0	0.1825	0.0936	0.0766	0	0	0	0	0	0.0392	0.0855	0	0	0.0234	0	0	0	0	0	0	0	0
SPSB1	562	AP	1			0	0.9782	0.4102	0.0597	1	0.9755	1	1	0.9088	1	1	0.95	1	0.8898	1	0.9611	1	0.9522	1	1	0.9894	0.9653	0.93	0.8175	0.8385	0.9234	0.9716	0.9708	1	1	0.9596	0.9465	0.8835	0.9712	0.8606	0.9766	1	1	1	1	1	1	0.9603	0.9382
SPSB1	563	AP	2			0	0.9782	0.2385	0.0336	0	0.0245	0	0	0.0912	0	0	0.05	0	0.1102	0	0.0389	0	0.0478	0	0	0.0106	0.0347	0.07	0	0.0679	0	0.0284	0.0292	0	0	0.0404	0.0142	0.031	0.0288	0.1394	0	0	0	0	0	0	0	0.0397	0.0618
TMEM201	564	AT	11			0	1	0.6457	0.1166	0.8127	0.6583	0.5218	0.4143	0.6825	0.7634	0.7421	0.637	0.7727	0.696	0.6097	0.7377	0.7307	0.6448	0.6497	0.5152	0.8295	0.8256	0.7567	0.6642	0.6545	0.7057	0.6646	0.6752	0.6092	0.7694	0.8311	0.783	0.7875	0.6466	0.6996	0.6344	0.4686	0.8075	0.7895	0.6916	0.5306	0.716	0.6701	0.5567
TMEM201	565	AT	6.2			0	1	0.6457	0.1166	0.1873	0.3417	0.4782	0.5857	0.3175	0.2366	0.2579	0.363	0.2273	0.304	0.3904	0.2623	0.2693	0.3552	0.3503	0.4848	0.1705	0.1744	0.2433	0.3358	0.3455	0.2943	0.3354	0.3248	0.3908	0.2306	0.1689	0.217	0.2125	0.3534	0.3004	0.3656	0.5314	0.1925	0.2105	0.3083	0.4694	0.284	0.3299	0.4433
TMEM201	566	ES	8	7	9	0	0.9836	0.438	0.043		0.9528		1	1	1	0.9748	0.9099	0.8707	0.9737	1	0.9121	0.7585	0.9309	0.8969	1	1	0.9903	1	0.9502	0.954	0.9162	0.9266	0.9182	1	1	0.8741	0.9567	0.9552	0.9771	0.9309	0.9624	0.9358	0.9087	0.9509	1	0.9472	1	1	1
PIK3CD	572	RI	17.2	17.1	17.3	0	0.9218	1	0.1553		0.1724		0.0507	0.3382	0.0611	0.0507	0.176	0.1037	0.2489		0.1121	0	0.7121	0.176		0.0293	0.1092	0.2381	0.0865	0.1879		0.089	0.0473		0.14	0.0281	0.2134	0.1363	0.1295		0.101	0.0306	0	0.0547	0.3793	0.2663	0.0212	0.1347	0.0886
PIK3CD	574	AA	8.1	7	8.2	0	0.9691	0.2152	0.0306	1	1		0.9439	0.9671	1	1	1	1	1		0.9211		1	1	1	1	0.9148	1	1	1	1	1	1	1	0.9762	0.9391	1	1	1	1	1	1	1	1	1	1	1	1	0.9408
CLSTN1	575	ES	11	10	12	0	1	0.9225	0.2006	0.1423	0.2613	0.7382	0.7015	0.3967	0.157	0.1804	0.3391	0.3579	0.3956	0.1284	0.0312	0.0568	0.5337	0.2608	0.3295	0.168	0.0922	0.0725	0.2182	0.6278	0.689	0.2512	0.4986	0.1088	0.8188	0.2935	0.1424	0.1694	0.2846	0.5662	0.3636	0.3723	0.3385	0.1815	0.2123	0.2315	0.2669	0.5708	0.4187
CLSTN1	576	ES	3	2	4	0	0.9982	0.5834	0.1045	0.0942	0.0949	0.249	0.2557	0.1664	0.0366	0.0609	0.1195	0.0932	0.1284	0.0922	0.0074	0.0392	0.1397	0.1058	0.2841	0.0477	0.0715	0.1685	0.1096	0.0647	0.1149	0.1024	0.1069	0.1452	0.1578	0.0742	0.0749	0.2009	0.0964	0.21	0.0531	0.1688	0.0509	0.1145	0.0152	0.1646	0.1515	0.1699	0.1883
CTNNBIP1	577	AP	1			0	0.9982	1	0.1479	0.3918	0.6684	0	0.6425	0.4206	0.5601	0.4196	0.7116	0.6701	0.6166	1	0.534	0.5857	0.5204	0.7627	0.5441	0.427	0.358	0.4127	0.4552	0.3908	0.4823	0.3987	0.5727	0.7851	0.7172	0.7267	0.6492	0.4964	0.7145	0.6382	0.7378	0.6665	0.6458	0.4345	0.6346	0.4149	0.4237	0.6939	0.4453
CTNNBIP1	578	AP	2			0	0.9982	0.7083	0.1331	0.4103	0.3316	0.5137	0.1262	0.2336	0.2464	0.5453	0.0979	0.2527	0.3834	0	0.3872	0.1631	0.2398	0.1736	0.4559	0.4193	0.3056	0.4654	0.5448	0.3837	0.1616	0.5196	0.2159	0.0498	0.2235	0.0604	0.2012	0.3845	0.1772	0.059	0.1416	0.1629	0.1417	0.2857	0.2542	0.237	0.3402	0.2107	0.1126
CTNNBIP1	579	AP	6.1			0	0.9982	0.4581	0.0905	0.0705	0	0	0.2313	0.1468	0.1936	0	0.1656	0.0772	0	0	0.0789	0.2512	0.2398	0.0637	0	0.1537	0.2689	0.1219	0	0.1407	0.2222	0.051	0.1319	0	0	0.1329	0.1496	0.1191	0.1083	0.2703	0.1007	0.1706	0.2125	0.1746	0.1112	0.2172	0.1627	0.0599	0.4422
CTNNBIP1	580	AP	4			0	0.9982	0.4863	0.0725	0.1274	0	0.4863	0	0.199	0	0.0351	0.0249	0	0	0	0	0	0	0	0	0	0.0675	0	0	0.0848	0.1339	0.0307	0.0795	0.1651	0.0593	0.08	0	0	0	0.0326	0.0199	0	0	0.1052	0	0.1309	0.0735	0.0355	0
CTNNBIP1	583	RI	8.2	8.1	8.3	0	1	0.1605	0.0241	0.9761	0.9486	0.9336	0.9432	0.9828	0.9321	0.9481	0.9347	0.9643	0.9171	0.9237	0.9288	0.9358	0.9233	0.9622	1	0.9655	0.945	0.9606	0.954	0.9492	0.9055	0.9868	0.9242	0.9453	0.9849	0.9647	0.9255	0.9774	0.9818	0.9753	0.955	0.9934	0.965	0.9634	0.9101	0.9795	0.962	0.9456	0.9249
CTNNBIP1	584	ES	3	1	5	0	0.9927	0.5227	0.0812	0.1544	0.3646		0.0887	0.2098	0.2324	0.132	0.2376	0.1227	0.1847	0.0714	0.3487	0.2595	0.3274	0.1498	0.467	0.1726	0.1373	0.1456		0.5227	0.1396	0.143	0.1381	0.0263	0.1157	0.1411	0.3496	0.1567	0.3134	0.0633	0.1865	0.1336	0.169	0.24	0.2651	0.2049	0.1869	0.1027	0.0836
LZIC	586	AP	1			0	1	0.6668	0.1175	0.4416	0.4319	0.4918	0.6	0.3007	0.3693	0.7622	0.509	0.4168	0.5066	0.248	0.4561	0.4731	0.3673	0.4692	0.406	0.4881	0.3414	0.2873	0.4669	0.3839	0.4407	0.4006	0.4705	0.4565	0.3583	0.3562	0.4301	0.3686	0.3999	0.4513	0.3895	0.5169	0.5566	0.3598	0.3604	0.3988	0.454	0.3709	0.4349
LZIC	587	AP	2			0	1	0.6668	0.1175	0.5584	0.5681	0.5082	0.4	0.6993	0.6307	0.2378	0.491	0.5832	0.4934	0.752	0.5439	0.5269	0.6327	0.5308	0.5939	0.5119	0.6586	0.7127	0.5331	0.6161	0.5593	0.5994	0.5295	0.5435	0.6417	0.6438	0.5699	0.6313	0.6001	0.5487	0.6105	0.4831	0.4434	0.6402	0.6396	0.6012	0.546	0.6291	0.5651
LZIC	588	AD	3.2	3.1	4	0	1	0.0353	0.0042	0.9954	1	1	1	1	1	0.9875	1	1	1	1	1	1	1	1	1	1	1	1	1	0.9961	1	1	1	1	0.9862	1	1	1	0.9923	1	1	1	1	1	1	1	1	1	0.9881
NMNAT1	589	AT	5			0	1	0.5418	0.0847	0.3543	0.4519	0.3275	0.3862	0.4569	0.4874	0.2835	0.3914	0.4404	0.4392	0.4211	0.3675	0.2394	0.5573	0.3813	0.3184	0.3662	0.3326	0.4255	0.4785	0.3757	0.3988	0.4583	0.4341	0.3188	0.3622	0.3056	0.3722	0.4043	0.5591	0.6821	0.4882	0.1962	0.3925	0.2754	0.4456	0.3572	0.427	0.3314	0.4696
NMNAT1	590	AT	6.3			0	1	0.5418	0.0847	0.6457	0.5481	0.6725	0.6138	0.5431	0.5126	0.7165	0.6086	0.5596	0.5608	0.5789	0.6325	0.7606	0.4427	0.6187	0.6816	0.6338	0.6674	0.5745	0.5215	0.6243	0.6012	0.5417	0.5659	0.6812	0.6378	0.6944	0.6278	0.5957	0.4409	0.3179	0.5118	0.8038	0.6075	0.7246	0.5544	0.6428	0.573	0.6686	0.5304
NMNAT1	591	RI	6.2	6.1	6.3	0	1	0.401	0.077	0.7582	0.7008	0.6392	0.7935	0.7621	0.8476	0.7759	0.8217	0.7541	0.6794	0.9197	0.6459	0.8535	0.7273	0.8454	0.6479	0.7383	0.7214	0.7023	0.627	0.6974	0.6976	0.6206	0.6998	0.7467	0.6922	0.7489	0.6889	0.7132	0.6018	0.7218	0.5878	0.8003	0.7811	0.8611	0.691	0.6166	0.6943	0.6684	0.6301
RBP7	592	ES	2	1	3	0	0.9891	0.9717	0.2079	0.1303	0.4158	0.4518	0.4228	0.4734	0.0772	0.1127	0.5346	0.7295	0.3286		0.5742	0.1303	0.6532	0.1665		0.3281	0.1826	0.3575	0.2668	0.0965	0.5742	0.3005	0.0944	0.3331		0.1873	0.5539	0.2067	0.5899	0.7535	0.2567	0.3331	0.0993	1	0.7906	0.5831	0.3844	0.262	0.3504
UBE4B	593	AT	3			0	1	0.4049	0.041	0.2144	0.0427	0.0309	0.009	0.0211	0.065	0.202	0.0421	0.1611	0.2214	0.1038	0.0698	0.1221	0.0986	0.0914	0.049	0.027	0.0239	0.0825	0.0578	0.0419	0.043	0.0715	0.0553	0.0035	0.0765	0.0338	0.0285	0.026	0.0145	0.0273	0.0113	0.0358	0.0144	0.0877	0.0459	0.0423	0.0327	0.0202	0.0106
UBE4B	594	AT	29			0	1	0.4049	0.041	0.7857	0.9573	0.9691	0.991	0.9789	0.935	0.798	0.9579	0.8389	0.7786	0.8962	0.9302	0.8779	0.9014	0.9086	0.951	0.973	0.9761	0.9175	0.9422	0.9581	0.957	0.9285	0.9447	0.9965	0.9235	0.9662	0.9715	0.974	0.9855	0.9727	0.9887	0.9642	0.9856	0.9123	0.9541	0.9577	0.9673	0.9798	0.9894
UBE4B	595	AD	27.2	27.1	28	0	0.9982	0.0327	0.0032	0	0.0111	0	0	0		0	0	0	0.012	0	0	0	0	0	0	0	0	0.0118	0	0	0	0	0	0	0	0	0	0	0.0066	0.0089	0	0	0	0	0	0	0	0	0
UBE4B	596	ES	8	7	9	0	0.9873	1	0.0863		0.1611	0	0.1555	0.0736		0.1259	0.1431	0.052	0.152	0	0.1166	0.138	0.1151	0.2111	0.031	0.0768	0.1043	0.1439	0.1311	0.096	0.192	0.115	0.148	0.0642	0.0695	0.0602	0.114	0.2119	0.193	0.0971	0.0733	0	0.0225	0.0726	0.1308	0.138	0.1563	0.0582	0.0741
KIF1B	601	AT	25			0	1	0.7142	0.1136	0.6277	0.3428	0.5529	0.5485	0.3673	0.4786	0.4015	0.4467	0.4868	0.4333	0.3185	0.1851	0.3008	0.2545	0.3994	0.4012	0.1922	0.4991	0.2717	0.3569	0.6522	0.4804	0.3024	0.3881	0.1523	0.6087	0.6092	0.4687	0.3147	0.2734	0.3477	0.3012	0.4202	0.3385	0.1821	0.4608	0.5985	0.3792	0.4644	0.3608
KIF1B	602	AT	52.2			0	1	0.7142	0.1136	0.3723	0.6572	0.4471	0.4515	0.6327	0.5214	0.5985	0.5533	0.5132	0.5667	0.6815	0.8149	0.6992	0.7455	0.6006	0.5988	0.8078	0.5009	0.7283	0.6431	0.3478	0.5196	0.6976	0.6119	0.8477	0.3913	0.3908	0.5313	0.6853	0.7266	0.6523	0.6988	0.5798	0.6615	0.8179	0.5392	0.4015	0.6208	0.5356	0.6392
KIF1B	604	AA	52.1	51	52.2	0	1	0.0575	0.0052	1	1	1	1	1	1	1	1	1	1	1	1	1	1	1	1	1	1	1	1	1	1	1	1	1	1	1	1	1	1	1	1	1	1	1	1	1	1	1	1
KIF1B	606	ES	00:16:17.100000	15	17.2	0	0.8273	0.7476	0.0854	0.1152	0.1783		0.1783	0	0.038	0.1648		0.1648	0.1669		0.0547		0.1783	0.0547	0.1568	0.0336	0		0	0.0486	0.088	0.0281	0.2366	0.0584	0.088	0.1103	0.1224	0.1568	0.1648		0		0.0212			0.0515		0.1333	0.1783
PGD	610	ES	4	3.2	5	0	1	0.0368	0.0057	0.9751	0.9897	0.9936	0.981	0.9824	0.9924	0.9943	0.9751	0.993	0.99	0.9847	0.99	0.9852	0.9889	0.9909	0.9887	0.9934	0.9884	0.9814	0.9913	0.9903	0.993	0.9947	0.9943	0.9943	0.9852	0.9885	0.9913	0.9774	0.9934	0.968	0.998	0.993	0.9773	0.994	0.9822	0.9841	0.9919	0.9847	0.9861
PGD	611	AA	3.1	2	3.2	0	1	0.0692	0.0082	0.0052	0.015	0.0114	0.0179	0.0182	0.0068	0.0213	0.0102	0.0091	0.0191	0	0.0095	0.0145	0.0066	0.0068	0.009	0.0122	0.0165	0.0095	0.0097	0.0105	0.0068	0.0104	0.0068	0.0054	0	0.0025	0.0144	0	0.0142	0.014	0.0063	0	0	0.0122	0.0077	0.0134	0.0077	0.0074	0
PGD	612	AD	1.2	1.1	2	0	1	0.0052	0.0007	0	0.0002	0.0012	0	0	0.0003	0.0005	0.0006	0.0005	0.0006	0	0.0004	0	0	0.0003	0	0.0002	0.0003	0.0017	0.0002	0.0009	0.0007	0.0016	0.0009	0	0	0.0011	0.0002	0	0.0008	0.0035	0.001	0	0.001	0.0003	0	0.0003	0.0004	0	0
APITD1	613	AT	6			0	1	0.2566	0.035	0.0506	0.1102	0.0101	0.0629	0.1515	0.0254	0.0328	0.0663	0.0647	0.058	0.0287	0.0553	0.0713	0.0614	0.1105	0.036	0.0216	0.0596	0.0334	0.037	0.0611	0.0279	0.0349	0.0469	0.0774	0.0885	0.0989	0.1	0.1671	0.0478	0.1247	0.1886	0.0396	0.1511	0.0452	0.1041	0.0331	0.0483	0.0816	0.0413
APITD1	614	AT	5			0	1	0.2566	0.035	0.9494	0.8898	0.9899	0.9371	0.8485	0.9746	0.9672	0.9337	0.9353	0.942	0.9713	0.9447	0.9287	0.9386	0.8895	0.964	0.9784	0.9404	0.9666	0.963	0.9389	0.9721	0.9651	0.9531	0.9226	0.9115	0.9011	0.9	0.8329	0.9522	0.8753	0.8114	0.9604	0.8489	0.9548	0.8959	0.9669	0.9517	0.9184	0.9587
DFFA	616	AT	5.3			0	1	0.5317	0.0779	0.1257	0.321	0.3127	0.315	0.3495	0.2673	0.3104	0.3345	0.3378	0.3119	0.3736	0.3274	0.2881	0.2838	0.2691	0.3276	0.2301	0.1682	0.3965	0.2321	0.1987	0.3049	0.2759	0.2779	0.2461	0.2797	0.1389	0.2005	0.2208	0.2164	0.2545	0.3196	0.4156	0.2409	0.1981	0.3773	0.3556	0.2671	0.2498	0.3229
DFFA	617	AT	6			0	1	0.5317	0.0779	0.8743	0.679	0.6873	0.685	0.6505	0.7327	0.6896	0.6655	0.6622	0.6881	0.6264	0.6726	0.7119	0.7162	0.7309	0.6724	0.7699	0.8318	0.6035	0.7679	0.8013	0.6951	0.7241	0.7221	0.7539	0.7203	0.8612	0.7995	0.7792	0.7836	0.7455	0.6804	0.5844	0.7591	0.8019	0.6227	0.6444	0.7329	0.7502	0.6771
DFFA	618	AD	5.2	5.1	6	0	0.9891	0.3911	0.0413	0	0.0548	0	0	0.0201	0	0	0.029	0.0602	0.1185	0	0	0.0236	0	0.0291	0.2586	0	0	0.0849	0	0	0.0679	0.0607	0.0471	0	0.0425	0.0458	0.0353	0	0	0	0.0381	0	0.0123	0.0257	0	0.0301	0.0549	0	0
DFFA	619	ES	4	3	5.1	0	1	0.1117	0.0163	0.9879	0.9675	0.9892	0.9825	0.9664	0.9941	0.9847	0.9708	0.9925	0.9776	0.9832	0.9651	0.9917	0.9723	1	0.983	0.9939	0.9929	0.975	0.9924	0.9821	0.9814	0.9905	0.9391	1	0.9813	0.9926	0.9815	0.9927	0.9902	0.9848	0.9765	0.9838	0.997	0.9765	0.8883	0.9812	0.9743	1	0.9636
PEX14	620	ES	3	2	4	0	1	0.4894	0.023	1	1	1	1	1	0.9777	0.9852	1	0.9743	1	1	0.9816	1	1	1	1	1	0.9894	0.9747	1	1	1	1	1	1	1	1	1	1	1	1	0.9922	0.9791	1	1	0.9683	0.9851	1	1	1
CASZ1	621	AT	16.2			0	1	0.7752	0.1327	0.4084	0.4498	0.0664	0.3731	0.4537	0.4672	0.524	0.6506	0.7196	0.5782	0.8116	0.4502	0.5508	0.4841	0.5521	0.4927	0.3683	0.4214	0.5573	0.3558	0.4793	0.6016	0.4817	0.452	0.5117	0.5404	0.5858	0.7059	0.4858	0.4113	0.6739	0.5991	0.7182	0.5775	0.6631	0.5782	0.5109	0.58	0.4457	0.3349
CASZ1	622	AT	21			0	1	0.7752	0.1327	0.5916	0.5502	0.9336	0.6269	0.5463	0.5328	0.476	0.3494	0.2804	0.4218	0.1884	0.5498	0.4492	0.5159	0.4479	0.5073	0.6317	0.5786	0.4427	0.6442	0.5207	0.3984	0.5183	0.548	0.4883	0.4597	0.4142	0.2941	0.5142	0.5887	0.3261	0.4009	0.2818	0.4225	0.3369	0.4218	0.4891	0.42	0.5543	0.6651
TARDBP	629	RI	7.5	7.4	7.6	0	1	0.0809	0.007	0.963	0.9968	0.9948	0.9962	0.9839	1	1	0.9985	0.9969	0.9981	1	0.9946	0.9919	0.9972	0.9933	1	1	0.9969	0.9962	0.9896	0.9915	0.9987	0.9975	0.9951	0.9884	0.9866	0.9836	0.978	0.989	0.999	0.9971	0.9908	0.9976	0.9978	0.9953	0.9983	1	1	1	0.9928
TARDBP	630	RI	7.3	7.2	7.4	0	1	0.0365	0.0042	0.9778	1	1	1	1	1	0.9975	1	0.9917	0.9974	0.9929	0.9928	0.9835	0.9982	0.9897	0.9945	1	0.9967	1	1	0.9958	1	0.9959	0.9954	0.9961	0.9907	0.9838	0.9958	0.9923	1	1	0.9974	0.9917	0.9924	1	1	1	1	1	0.9904
TARDBP	631	RI	7.2:7.3	7.1	7.4	0	1	0.0265	0.0038	0.991	1	1	1	0.9983	0.9929	0.9926	0.9942	1	1	1	1	1	0.9982	0.9979	1	0.998	0.9978	0.9839	0.9924	1	0.9981	1	0.9977	1	1	0.9879	0.9925	0.9954	1	0.993	0.9987	1	1	0.9982	1	0.9943	1	0.9852	1
TARDBP	633	ES	03:04:00	2	5	0	1	0.2636	0.0408	1	0.9698	1	0.7364	0.9389	1	1	0.8939	0.9004	0.9688	1	0.9638	0.9331	1	1	0.8727	1	0.8368	1	0.9385	0.9696	0.903	0.9323	0.7981	0.9575	0.9497	0.7881	0.963	0.965	0.8803	0.9728	0.9224	1	0.9349	1	0.973	0.8901	0.951	1	0.9468
TARDBP	634	ES	4	2	5	0	1	0.0446	0.0049	1	0.9974	1	0.9833	0.9956	1	1	0.9923	0.99	0.9963	1	0.9969	0.9946	1	1	0.9939	1	0.9896	1	0.995	0.9983	0.9928	0.9949	0.9892	0.9978	0.9965	0.9871	0.9964	0.995	0.9886	0.9749	0.9921	1	0.9949	1	0.9938	0.9924	0.995	1	0.9923
TARDBP	635	ES	3	2	4	0	1	0.6566	0.0683	0.0979	0.101	0.0951	0.0603	0.0834	0.0564	0.0646	0.0801	0.1092	0.1356	0.0395	0.0991	0.0918	0.1741	0.0671	0.0528	0.09	0.067	0.1443	0.0937	0.0672	0.0842	0.0823	0.0546	0.0613	0.0804	0.061	0.109	0.1562	0.1021	0.5418	0.1103	0.0712	0.0875	0.058	0.2254	0.0738	0.1101	0.127	0.1513
MASP2	636	AT	12			0	0.9673	0.8088	0.0709	1	1	1	1	1		1	1		1		1	1	0.9203	1			1	0.9299	1	1	1	1	1	1	1	1	1	0.9781	1	1	1		1	0.7835	1	1	1	1	1
MASP2	637	AT	5			0	0.9673	0.8088	0.0709	0	0	0	0	0		0	0		0		0	0	0.0797	0			0	0.0701	0	0	0	0	0	0	0	0	0	0.0219	0	0	0		0	0.2165	0	0	0	0	0
SRM	640	AA	2.1	1	2.2	0	1	0.166	0.0266	0.0938	0.0569	0.0293	0.0503	0.0712	0.0587	0.0352	0.0552	0.0653	0.0687	0.0732	0.069	0.0709	0.1042	0.0509	0.1139	0.0769	0.0766	0.0767	0.0461	0.0461	0.0858	0.0862	0.1261	0.0374	0.0761	0.0696	0.0705	0.0907	0.0625	0.0802	0.0593	0.0471	0.1122	0.0508	0.0963	0.0745	0.0794	0.0874	0.0582
EXOSC10	643	ES	18	17	19	0	1	0.0406	0.0062	1	0.9936	1	0.9922	1	1	1	1	1	0.9894	1	1	0.9838	1	1	0.9697	0.994	0.9976	0.9957	1	1	0.9872	0.9962	0.9939	0.9968	0.9917	0.9834	0.9948	0.9979	1	1	0.993	1	0.9955	0.9952	0.991	1	0.9955	0.9945	1
EXOSC10	644	RI	16.4	16.3	16.5	0	1	0.5508	0.0749	0.1703	0.2224	0.0887	0.0755	0.1963	0.0879	0.111	0.1627	0.0973	0.2401	0.0128	0.086	0.0662	0.258	0.1519	0.0267	0.0852	0.0794	0.1948	0.2242	0.1448	0.1173	0.2355	0.1091	0.1332	0.0645	0.1217	0.1661	0.256	0.1927	0.3002	0.0779	0.0878	0.0593	0.0439	0.2402	0.1017	0.1792	0.1393	0.1649
EXOSC10	645	RI	16.2	16.1	16.3	0	1	0.4691	0.078	0.2255	0.2309	0.1815	0.0217	0.1976	0.0441	0.0786	0.1376	0.0596	0.3024	0	0.0538	0.0356	0.2118	0.1256	0.0311	0.0464	0.0616	0.1463	0.1512	0.0772	0.0905	0.1883	0.1247	0.0774	0.0441	0.1133	0.1272	0.168	0.1599	0.0519	0.0301	0.0931	0.0157	0.0116	0.2546	0.0928	0.1625	0.1821	0.1085
EXOSC10	647	ES	4	3	5	0	1	0.7584	0.1205	0.3615	0.466	0.1803	0.4064	0.3762	0.2852	0.3215	0.4189	0.2588	0.4142	0.4143	0.288	0.3538	0.5661	0.2873	0.2911	0.4334	0.2911	0.5573	0.373	0.3272	0.309	0.4671	0.4012	0.364	0.2326	0.2604	0.4251	0.5736	0.3392	0.7638	0.3879	0.5946	0.4218	0.626	0.4789	0.5091	0.4578	0.461	0.5906
MTOR	648	AP	1			0	0.8709	1	0.1727		0.7522	0		0.8652		0.8835	0.7522	0.7914	0.7522		0.8835		0.6365	0.7166		0.8691	0.9219		0.6548		0.9267	0.4766	0.7522	0.7597	0.8985	0.8505	0.7042	0.2564	0.615	0.5386	0.9522		0.8951	0.9267	0.5426		0.4574	0.8981	0.7166
MTOR	649	AP	39.1			0	0.8709	1	0.1727		0.2478	1		0.1348		0.1165	0.2478	0.2086	0.2478		0.1165		0.3635	0.2834		0.1309	0.0781		0.3452		0.0733	0.5234	0.2478	0.2403	0.1015	0.1495	0.2958	0.7436	0.385	0.4614	0.0478		0.1049	0.0733	0.4574		0.5426	0.1019	0.2834
UBIAD1	650	AT	3			0	1	0.2395	0.0362	0.085	0.043	0.1464	0.0437	0.1113	0.0395	0.0509	0.049	0.0543	0.0979	0.1281	0.0352	0.0139	0.0407	0.0728	0.1568	0.0498	0.1076	0.0238	0.0348	0.088	0.0313	0.0305	0.0487	0.035	0.1061	0.1479	0.1389	0.0357	0.0926	0.0468	0.0886	0.0287	0.0406	0.0024	0.0716	0.0516	0.0203	0.058	0.0576
UBIAD1	651	AT	2			0	1	0.2395	0.0362	0.915	0.957	0.8536	0.9563	0.8887	0.9605	0.9491	0.951	0.9457	0.9021	0.8719	0.9648	0.9861	0.9593	0.9272	0.8432	0.9502	0.8924	0.9762	0.9652	0.912	0.9687	0.9695	0.9513	0.965	0.8939	0.8521	0.8611	0.9643	0.9074	0.9532	0.9114	0.9714	0.9594	0.9976	0.9284	0.9484	0.9797	0.942	0.9424
FBXO44	654	AP	1			0	0.98	0.4629	0.0645	0.1895	0.1576		0.0824	0.1926	0.123	0.0339	0.1261	0.0952	0.0619	0.123	0.1367	0.0885	0.1302	0.0894	0	0.0682	0.032	0.1328	0.2632	0.2304	0.0742	0.1971	0.2723	0.2712	0.2862	0.1294	0.0937	0.1506	0.2191	0.1147	0.1061	0.1401	0.1208	0.2926	0.1333	0.2265	0.1911	0.0703	0.1867
FBXO44	655	AP	2			0	0.98	0.4629	0.0645	0.8105	0.8424		0.9176	0.8074	0.877	0.9661	0.8739	0.9048	0.9381	0.877	0.8633	0.9115	0.8698	0.9106	1	0.9318	0.968	0.8672	0.7368	0.7696	0.9258	0.8029	0.7277	0.7288	0.7138	0.8706	0.9063	0.8494	0.7809	0.8853	0.8939	0.8599	0.8792	0.7074	0.8667	0.7735	0.8089	0.9297	0.8133
FBXO44	656	AD	5.2	5.1	6	0	0.9473	0.3327	0.0669	0.9353	1	0.8838	1	0.8418	0.924		0.9551	1	0.8116	1	0.9177	1	0.9383	0.9682		1	1	0.7065	0.8418	1	0.95	0.9518	0.9566	0.9846	1	1	0.9617	1	0.958		0.9003	1	0.87	0.9605	0.8575	1	0.8932	0.8964	0.9168
FBXO44	657	ES	5.2:6	5.1	7	0	0.9982	0.6195	0.1181	0.7547	0.6671	0.463	0.5943	0.6129	0.5429	0.4954	0.713	0.5027	0.6407	0.7178	0.6757	0.3838	0.6353	0.5701	0.4973	0.651	0.5641	0.6575	0.6234	0.4678	0.7389	0.7808	0.7337	0.766	0.6107	0.5017	0.639	0.5267	0.9081	0.6392	0.3087	0.6409	0.5418	0.6099	0.6919	0.6076	0.4985	0.537	0.8667
FBXO44	658	ES	6	5.1	7	0	0.9182	0.7064	0.1315	0.1835	0	0.1048	0	0.2401	0.0886		0.11	0	0.3024		0.1653	0	0.1085	0.0441		0	0	0.4573	0.2505	0	0.1368	0.1628	0.1173	0.0525	0	0	0.0719	0		0.3926	0.052	0	0.1584	0.0634	0.2941	0	0.1155	0.1267	0.3828
FBXO44	659	AA	3.1	2	3.2	0	0.9564	0.6628	0.122	0.5598	1		0.8896	0.9011			0.8679	0.5974	0.8841	0.6561	0.8679	1	1	1		0.8413	1	1	1	1	0.8513	1	1	1	0.748	0.8357	0.9088	1	0.9088		0.9339	1	0.7411		1	1	1	1	0.8413
FBXO44	660	ES	3.1:3.2	2	4	0	0.9909	0.9564	0.1345	0.4068	0.5261		0.2784	0.3618	0.284	0.0561	0.2309	0.112	0.466	0.2428	0.2281	0.2049	0.4734	0.1278	0.373	0.3064	0.1514	0.6982	0.5812	0.5881	0.3085	0.5363	0.3529	0.3037	0.3166	0.2417	0.3924	0.3005	0.3726	0.1168	0.3253	0.2007	0.2303	0.1514	0.4335	0.4097	0.265	0.2282	0.318
FBXO44	661	ES	3.2	2	4	0	0.8782	0.4015	0.0531				0.0395	0.0554		0	0.0495	0.0642	0.1038		0.0401	0	0	0		0.0736	0				0.0591		0	0	0.1502	0.0566	0.0546	0	0.0482		0.033	0	0.1065	0	0	0	0	0	0.072
MAD2L2	664	AD	7.2	7.1	8	0	1	0.127	0.018	0.0142	0.0499	0.0146	0.0136	0.0337	0.0274	0.0229	0.0241	0.05	0.0235	0.0272	0.0214	0.0171	0.023	0.0256	0	0.0343	0.0096	0.0288	0.0296	0.0544	0.0236	0.0241	0.0247	0.0257	0.053	0.0241	0.0208	0.0326	0.0246	0.0376	0.0503	0.0347	0.019	0.0509	0.0625	0.0301	0.0272	0.0566	0.0308
MAD2L2	665	ES	02:03:00	1	4	0	1	0.9174	0.193	0.6609	0.8858	0.2946	0.2216	0.8678	0.9592	1	0.725	1	0.9541	0.9241	0.9435	0.5806	0.9519	0.8452	1	1	0.9569	1	1	0.3577	0.9083	0.9165	0.9435	0.5178	0.8674	0.9833	0.9144	0.6351	1	1	0.4208	0.9541	0.8064	0.8456	1	0.8189	0.7687	0.9538	0.8245
AGTRAP	666	AD	6.2	6.1	7	0	1	0.3231	0.0355	0.7966	0.815	0.8301	0.8694	0.801	0.7853	0.7862	0.7896	0.8038	0.8028	0.8012	0.8507	0.8402	0.7734	0.8206	0.6706	0.839	0.8476	0.8878	0.8293	0.7872	0.7472	0.8295	0.8044	0.8554	0.8706	0.8274	0.7638	0.8028	0.8515	0.8962	0.8087	0.8512	0.7903	0.8627	0.7971	0.8349	0.8209	0.8162	0.8248
AGTRAP	667	ES	4.1:4.2:5	3	6.1	0	0.9964	0.2991	0.0292	1	1	1	1	1	1	1	1	1	1	1	1	1	1	1	1	0.9229	1	1	1	1	1	1	1	1	1	1	0.98	1	1	1	1	1	1	0.9494	1	1	1	1	1
AGTRAP	668	ES	4.2:5	3	6.1	0	0.9818	0.1822	0.0186	1	1		1	1	1	1	1	1	1	1	1	1	1	1		0.9653	1	1	1	1	1	1	1	1	1	1	0.9914	1	1		1	1	1	0.9853	1	1	1	1	1
AGTRAP	669	ES	5	3	6.1	0	1	0.0362	0.0026	1	1	1	1	1	1	1	1	1	1	1	1	1	1	1	1	0.9935	1	1	1	1	1	1	1	1	1	1	0.9968	1	1	1	1	1	1	0.999	1	1	1	1	1
AGTRAP	670	AA	4.1	3	4.2	0	0.9818	0.8828	0.1462	0.807	0.5018	0.5704	0.535	0.4933	0.5679	0.2438	0.4134	0.4695	0.705		0.467	0.4726	0.5111	0.5404	1	0.4057	0.4817	0.515	0.381	0.6581	0.3172	0.5227	0.3438	0.3274	0.3046	0.536	0.3813	0.6057	0.5444	0.7993	0.7133	0.4084	0.374	0.3094	0.5205	0.5444	0.6419	0.3939	0.4594
AGTRAP	671	ES	4.1:4.2	3	5	0	1	0.4871	0.0526	0.0919	0.2009	0.4871	0.1935	0.0876	0.1415	0.0556	0.0587	0.1041	0.2113	0.0821	0.0987	0.0752	0.1667	0.1358	0.1575	0.1088	0.0381	0.1116	0.102	0.154	0.0463	0.1173	0.0946	0.0813	0.0474	0.1099	0.19	0.1555	0.1685	0.1273	0.1104	0.0526	0.0568	0.0307	0.1724	0.0854	0.0473	0.1337	0.1458
AGTRAP	672	ES	4.2	3	5	0	1	0.399	0.0619	0.0257	0.2304	0.399	0.1945	0.0908	0.1423	0.1628	0.0833	0.1385	0.131	0.1131	0.1403	0.1169	0.1739	0.1377	0	0.1907	0.0514	0.1143	0.1815	0.0979	0.1091	0.13	0.198	0.1675	0.1228	0.1148	0.316	0.1154	0.1482	0.0375	0.0569	0.0896	0.1219	0.0836	0.1744	0.0881	0.0332	0.2032	0.1887
AGTRAP	675	ES	3:4.1:4.2	1	5	0	0.9509	0.7115	0.12	0.8928	1	1	0.8579	0.566	0.8963	1	0.8895	1	0.959		0.7505	0.4622	0.7206	0.9066	1	0.74	0.2885	0.7605	0.7868	0.8545		0.9375	0.6325	0.5999	0.8353	0.8741	0.8692	0.7195	0.6811		0.9462	0.7466		0.7661	0.8415	0.8419	0.8151	1	0.759
AGTRAP	677	ES	00:03:04.200000	1	5	0	0.9673	0.5111	0.0744	0.811	1	1	0.9045	0.6951	0.9274	1	0.9532	1	0.9581	1	0.8457	0.8366	0.8114	0.9353		0.9474	0.6317	0.8236	0.9129	0.9291	1	0.9619	0.9346	0.8248	0.9539	0.9184	0.9571	0.8615	0.8631		0.9259	0.8818	1	0.9251	0.9028	0.8986	0.8263	1	0.9377
AGTRAP	679	ES	3	1	5	0	0.9982	0.0646	0.0082	0.9944	1		0.9807	0.9622	0.9898	1	0.9962	1	0.9951	1	0.9762	0.9824	0.959	0.9913	1	0.99	0.9743	0.976	0.9829	0.9927	1	0.9951	0.9873	0.9646	0.9951	0.9913	0.9847	0.9813	0.9754	1	0.9957	0.9897	1	0.9948	0.9816	0.9912	0.9942	1	0.9876
AGTRAP	680	ES	2	1	3	0	1	0.0971	0.0138	0.0163	0	0	0	0	0.0123	0.0036	0.006	0.0198	0	0.0939	0.0108	0	0.0516	0.0086	0	0	0.0055	0.0108	0	0	0.0163	0.0124	0.0031	0	0.0206	0.0032	0.0301	0.0149	0.03	0.0875	0.0034	0.0292	0.0227	0.0066	0.0124	0.0205	0.0049	0.0103	0.0179
CLCN6	686	AT	24			0	1	0.6809	0.0767	0.6967	0.6223	0.6611	0.8334	0.6239	0.7047	0.7224	0.6892	0.6743	0.6467	0.8878	0.6261	0.7493	0.5476	0.6714	0.7017	0.7091	0.7908	0.6613	0.7429	0.6886	0.6749	0.6778	0.6818	0.7323	0.8145	0.7672	0.6959	0.6868	0.5299	0.2069	0.7103	0.7592	0.7619	0.7546	0.7306	0.7164	0.574	0.7633	0.6782
CLCN6	687	AT	23.2			0	1	0.0791	0.0135	0.0268	0.0215	0	0.0049	0.0078	0.0157	0.0092	0.0198	0	0.0366	0	0.0613	0	0.0402	0.0055	0	0	0.0027	0.0193	0.0191	0.0051	0	0.0321	0.0149	0.0084	0.0273	0.0087	0.0168	0.0315	0.0335	0.0196	0.0063	0.0088	0	0.0052	0.0118	0	0.0146	0.0039	0.0095
CLCN6	688	AT	6			0	1	0.6613	0.0747	0.2766	0.3562	0.3389	0.1617	0.3682	0.2797	0.2684	0.2911	0.3257	0.3168	0.1122	0.3126	0.2507	0.4123	0.3231	0.2983	0.2909	0.2065	0.3194	0.238	0.3063	0.3251	0.29	0.3033	0.2594	0.1582	0.2241	0.2873	0.2817	0.4366	0.7735	0.2835	0.232	0.2381	0.2402	0.2576	0.2836	0.4114	0.2328	0.3123
CLCN6	689	ES	13	12	14	0	0.9436	0.8285	0.1617		0.7512	0.5869	0.9457	0.4774	1		0.7617		0.8818	0.6152	0.5542		0.4631	0.81	0.7397	0.8793	0.8504	0.8579	0.842	0.7714	1	0.8033	0.8056	0.7548	0.6614	0.8818	0.551	0.7617	0.6545		0.9547	0.7714	0.9357		1	0.7132	0.822	0.7389	0.7617
CLCN6	690	ES	3	2	4	0	0.8982	0.1795	0.0145		1		1	1			1		1				1	1		1	1	1			1	1	1	1	1	1	1	1	1		1		1	1	1	1	1	1	1
KIAA2013	693	AT	2.2			0	1	0.1325	0.0191	0.0197	0.0536	0.0447	0.0469	0.0657	0.0136	0.008	0.0421	0.0259	0.028	0.0189	0.0374	0.0035	0.0684	0.025	0.0392	0.0385	0.0324	0.0201	0.0532	0.024	0.0196	0.0342	0.0522	0.0377	0.0133	0.017	0.0334	0.0309	0.0548	0.0344	0.0539	0.0066	0.0409	0.0073	0.0215	0.0486	0.0137	0.0447	0.0365
KIAA2013	694	AT	3			0	1	0.1325	0.0191	0.9803	0.9464	0.9553	0.9531	0.9343	0.9864	0.992	0.9579	0.9741	0.972	0.9811	0.9626	0.9965	0.9316	0.975	0.9608	0.9615	0.9676	0.9799	0.9468	0.976	0.9804	0.9658	0.9478	0.9623	0.9867	0.983	0.9666	0.9691	0.9452	0.9656	0.9461	0.9934	0.9591	0.9927	0.9785	0.9514	0.9863	0.9553	0.9635
PLOD1	695	ES	2	1	3	0	1	0.2745	0.0288	0.0248	0.0754	0.0347	0.0321	0.0412	0.0796	0.0457	0.0444	0.0178	0.0354	0.0819	0.0737	0.018	0.0414	0.0222	0.0347	0.0772	0.039	0.08	0.0416	0.0404	0.0315	0.0426	0.0724	0.0898	0.0698	0.0154	0.0374	0.0444	0.0935	0.034	0.0384	0.0596	0.0333	0.0306	0.0189	0.0139	0.0677	0.022	0.0772
MFN2	696	ES	2	1	3	0	1	0.1898	0.025	1	0.9428	1	0.9304	0.8855	0.9774	0.9781	0.9707	0.958	0.963	1	0.9613	0.942	0.9569	0.9712	0.897	0.9769	0.9342	0.8913	0.981	0.9935	0.989	0.9768	0.9609	0.9702	0.966	0.9524	0.9959	0.9686	0.9841	1	0.9683	0.937	0.9257	0.9549	0.9085	0.9507	0.9476	0.9684	0.9607
MIIP	697	ES	8	7	9	0	0.9982	0.1682	0.0081	1	1		1	0.995	1	0.9928	0.8318	1	1	1	1	0.9933	1	1	1	1	1	1	1	1	1	0.9929	1	1	1	1	1	1	1	1	1	0.992	1	0.9958	1	1	1	1	0.9903
TNFRSF1B	702	AT	5			0	1	0.0131	0.0009	0	0	0	0	0	0	0	0	0	0	0	0	0	0	0	0	0	0	0	0	0	0	0	0	0	0	0	0	0	0	0	0	0	0	0	0	0	0	0	0
TNFRSF1B	703	AT	11			0	1	0.0131	0.0009	1	1	1	1	1	1	1	1	1	1	1	1	1	1	1	1	1	1	1	1	1	1	1	1	1	1	1	1	1	1	1	1	1	1	1	1	1	1	1	1
PDPN	710	AP	1.1			0	0.9982	0.3766	0.0592	0.9049	0.9218	0.7663	0.9104	0.9807	0.8988	0.8288	0.9345	0.9031	0.7672	0.9136	0.9267	0.8827	0.931	0.9173	0.9533	0.8138	0.968	0.9237	1	0.8699	0.9048	1	0.9381	1	0.9827	0.9641	0.9364	0.9723	1	0.9799	0.97	0.8283	0.9493	1	0.9448	0.9823	0.9133	0.9702	0.98
PDPN	711	AP	2			0	0.9982	0.3385	0.0485	0.0952	0.0616	0.1309	0.0093	0.0108	0.0716	0.0881	0.032	0.0889	0.1896	0.0422	0	0.1173	0.0268	0.0621	0	0.1609	0.023	0.035	0	0.0774	0.0585	0	0.0557	0	0.0118	0	0.0447	0	0	0.0078	0	0.1389	0.0402	0	0.0309	0.0099	0.0569	0.0176	0.0112
PDPN	712	AP	3.1			0	0.9982	0.3415	0.0287	0	0.0166	0.1028	0.0803	0.0085	0.0296	0.0831	0.0335	0.0081	0.0432	0.0442	0.0733	0	0.0422	0.0206	0.0467	0.0253	0.009	0.0413	0	0.0527	0.0368	0	0.0063	0	0.0054	0.0359	0.0189	0.0277	0	0.0123	0.03	0.0328	0.0105	0	0.0242	0.0078	0.0298	0.0122	0.0088
PDPN	713	AD	8.2	8.1	9	0	0.9927	0.5474	0.0612	0.6918	0.6213	0.6525	0.6178	0.5855	0.6805	0.7259	0.6972	0.6442	0.6525	0.5648	0.7897	0.6684	0.6556	0.6372	0.7291	0.6757	0.6242	0.6074	0.5614	0.6471	0.5698	0.6361	0.5922	0.4842	0.7091	0.6355	0.5641	0.6282	0.4842	0.537	0.5747	0.5352	0.5859	0.5924	0.5953	0.5868	0.6654	0.6126	0.602
PDPN	714	ES	6	5	7	0	1	0.0469	0.0046	1	0.9983	0.9947	0.9935	0.9966	0.9983	0.9928	0.9905	0.9987	0.9973	1	1	0.9936	1	0.9967	1	0.9984	0.9859	0.9943	0.988	0.9963	1	1	0.9967	1	0.9991	1	0.9977	1	1	0.9957	0.9947	0.9948	1	1	0.9968	1	1	1	0.9961
PDPN	717	AD	1.2	1.1	5	0	0.9691	0.1538	0.0149	0.0335	0.0082	0	0	0.0027	0.0134	0.0204	0.0169	0.0131	0.0097	0.0128	0	0	0.0034	0.0043	0.0129	0.0176	0.0075	0.0103	0.0122	0.0122	0.0153	0.0114	0.0128	0.0537	0.0058	0	0.0145	0	0.0227	0.0135	0.003	0	0.0291	0	0.0169	0	0.0084	0.0064	0
PRDM2	721	AT	11			0	1	0.4889	0.0836	0.8019	0.7172	0.8391	0.7206	0.6127	0.8347	0.8282	0.8006	0.8463	0.8165	0.6443	0.8153	0.8539	0.7854	0.8157	0.7496	0.8896	0.8845	0.8522	0.82	0.9195	0.8861	0.6583	0.7837	0.7491	0.8309	0.8229	0.7897	0.6779	0.7187	0.5811	0.6535	0.8014	0.7773	0.8468	0.8101	0.7307	0.9111	0.678	0.8007
PRDM2	722	AT	13			0	1	0.4889	0.0836	0.1981	0.2828	0.1609	0.2794	0.3873	0.1653	0.1718	0.1994	0.1537	0.1835	0.3557	0.1847	0.1461	0.2146	0.1843	0.2504	0.1104	0.1155	0.1478	0.18	0.0805	0.1139	0.3417	0.2163	0.2509	0.1691	0.1771	0.2103	0.3221	0.2813	0.4189	0.3465	0.1986	0.2227	0.1532	0.1899	0.2693	0.0889	0.322	0.1993
PRDM2	723	ES	10	9	12	0	0.9491	0.8402	0.1877	0.8993	0.628	0.8542	0.8941	0.9705	0.571	0.5367	1	0.4779	1	0.3577	0.4632		0.882	0.7672	1	0.613	0.8482	1	0.8307	1		0.6884	0.8826	0.6883	1	0.902	0.6396	0.6882	0.9667	1	0.9025	0.4249	0.5228	0.668	0.4409	0.8783	1	1	0.6621
PRDM2	724	ES	08:09:10	7	12	0	0.8673	1	0.3011		0.1017	1		0.19	0.0517	0.0488		0.0249	1		1		0.213				0.1281	0.057		0.5365		0.1308	0.357	0.15	0.2159	0.1254	0.1317	0.0689	0.6946	0.2866	0.3579		0.2351			1	1	0.1433	0.4605
PRDM2	725	ES	09:10:00	7	12	0	0.9473	0.8473	0.2014	0.8977	0.7271	1	1	0.7925	0.4822	0.3899	0.7059	0.2982	1	0.5241	1		0.6861	0.5198	0.5123	0.3367	0.7245	0.4287	0.763	0.8664		0.7111	0.8727	0.5797	0.6355	0.4989	0.7117	0.6771	0.8789	0.5313	0.8019	0.4202	0.8365	0.4974	1	1	1	0.7262	0.6694
PRDM2	728	ES	8	7	9	0	0.9018	0.4689	0.0836		0.0456			0.0681	0.0646	0.0816	0	0.0646	0.2138	0	0.2027	0.1508	0.1255	0		0.0301	0.0599	0.0816	0	0.1716	0.189	0.0646	0.0873	0.1255	0.1555	0.1422	0.0663	0.0398	0.2591		0.1401		0.0624		0.0485	0.0456	0.189	0.0671	0.3321
KAZN	729	AP	1.1			0	0.8255	0.9667	0.1877	0.2418	0		0	0.3729		0.341	0.0621		0				0.1875	0.212		0	0.0501	0.0704		0.3613	0.4621	0.2655	0.3401		0	0	0	0.364	0.4965	0.0767	0.3319	0.1894	0.4923	0	0.1403	0.1571	0.4915	0	0.0795
KAZN	730	AP	3			0	0.8255	0.6531	0.1076	0	0.4195		0	0		0.0593	0.054		0.1573				0	0.0614		0	0.0872	0.1835		0	0	0.0923	0		0.2648	0	0.0245	0.1055	0.054	0.3333	0	0.2471	0.0428	0.2985	0.2438	0	0	0	0
KAZN	731	AP	2			0	0.8255	1	0.2511	0.2502	0.4993		0.291	0.4181		0.5998	0.4661		0.8427				0.3396	0.5484		0.8471	0.7784	0.5096		0.4362	0.5379	0.3297	0.6599		0.7352	1	0.7863	0.3265	0.2408	0.3967	0.5395	0.245	0.3821	0.5861	0.1447	0.4469	0.5085	0.3677	0.4526
KAZN	732	AP	4			0	0.8255	0.9503	0.24	0.508	0.0811		0.709	0.209		0	0.4178		0				0.4729	0.1782		0.1529	0.0843	0.2365		0.2025	0	0.3124	0		0	0	0.1892	0.204	0.2087	0.1933	0.1286	0.3185	0.0828	0.1154	0.4712	0.396	0	0.6323	0.4679
KAZN	733	AT	11.2			0	1	0.6977	0.1057	0.8266	0.8721	0.9202	0.8119	0.5064	0.8815	0.975	0.9237	0.9485	0.8791	0.9243	0.8084	0.9605	0.8445	0.9369	0.8291	0.964	0.957	0.8676	0.8974	0.968	0.9385	0.8219	0.8586	0.4457	0.8283	0.8949	0.9336	0.9085	0.657	0.8644	0.8226	0.9544	0.7731	0.9806	0.8589	0.9104	0.9756	0.8635	0.8429
KAZN	734	AT	18			0	1	0.6977	0.1057	0.1734	0.1279	0.0798	0.1881	0.4936	0.1185	0.025	0.0763	0.0515	0.1209	0.0757	0.1916	0.0395	0.1555	0.0631	0.1709	0.036	0.043	0.1324	0.1026	0.032	0.0615	0.1781	0.1414	0.5543	0.1717	0.1051	0.0664	0.0915	0.343	0.1356	0.1774	0.0456	0.2269	0.0194	0.1411	0.0896	0.0244	0.1365	0.1571
TMEM51	736	AP	2			0	0.9673	0.9138	0.1574	0.3581	0.2293	0	0.3968	0.4401	0.5892	0.702	0.3461	0.401	0.2924	0.501	0.4085	0.7074	0.3469	0.3581	0.3458		0.5273	0.7176	0.295	0.1103		0.3394	0.2455	0.3225	0.3092	0.6291	0.858	0.4595	0.3928	0.5566	0.3434	0.2508	0.6165	0.7166	0.4597	0.5408	0.4716	0.2996	0.4646
TMEM51	737	AP	1			0	0.9673	0.9138	0.1574	0.6419	0.7707	1	0.6032	0.5599	0.4108	0.298	0.6539	0.599	0.7076	0.499	0.5915	0.2926	0.6531	0.6419	0.6542		0.4727	0.2824	0.705	0.8897		0.6606	0.7545	0.6775	0.6908	0.3709	0.142	0.5405	0.6072	0.4434	0.6566	0.7492	0.3835	0.2834	0.5403	0.4592	0.5284	0.7004	0.5354
TMEM51	738	AA	5.1	4	5.2	0	0.98	0.3172	0.0314	0.9762	0.9664		0.9432	0.9822	0.9614	1	0.9903	0.935	0.9096	1	0.9439	1	1	1	1	0.9306	1	0.9509	0.9726	0.8703	1	0.9672	1	0.9571	0.9551	0.9418	0.9794	0.945	0.985	0.9578	1	0.9726	1	0.9702	0.9795	0.9257	1	0.9857	1
TMEM51	739	ES	3	2	4	0	0.88	0.7794	0.1366	0.807			0.7624	0.6206	0.8142	0.5433	0.7785		0.7019	0.5565	0.7744	0.7699	0.6765	0.5272	0.6408	1	0.736	0.6612				0.728	0.5979	0.5838	0.6976	0.736	0.6267	0.7699	0.8744		0.6065	0.8364	0.4202	0.787	0.9263	0.7054	0.5272	0.5554	0.8788
FHAD1	747	AT	15.2			0	0.9909	0.9515	0.2088	0	0.2835	0	0.655	0.7178	0.6041	0.3294	0.9209	0.4927	0.2726		0.2964	0.4511	0	0.2726	0.471	0	0.4538	0.48	0.3134	0.1919	0	0.2912	0.471	0.3824	0.9515	0.2326	0.3574	0.1375	0.2053	0.2087	0.3659	0.4975	0	0.2726	0.1994	0.2726	0.391	0.3846	0.3148
FHAD1	748	AT	34			0	0.9909	0.2605	0.044	0	0	0	0	0.0144	0	0	0	0	0		0.225	0	0	0	0	0	0	0	0.1586	0	0	0	0	0	0	0	0.0905	0	0.0624	0	0.1401	0	0	0	0	0	0.1048	0	0
FHAD1	749	AT	36			0	0.9909	0.9515	0.2126	1	0.7165	1	0.345	0.2678	0.3959	0.6706	0.0791	0.5073	0.7274		0.4786	0.5489	1	0.7274	0.529	1	0.5462	0.52	0.528	0.8081	1	0.7088	0.529	0.6176	0.0485	0.7674	0.5521	0.8625	0.7323	0.7913	0.4939	0.5025	1	0.7274	0.8006	0.7274	0.5041	0.6154	0.6852
CASP9	758	AP	2			0	0.9945	0.2718	0.0426	1	1		0.9636	1	1	1	0.9815	1	0.8811	1	0.9669	0.8998	0.8842	1	1	0.9497	0.9788	1	1	1	1	1	0.9597	0.9359	1	0.9708	0.8779	0.9238	1	0.9418	1	0.9678	1	1	1	1	1	0.9291	0.963
CASP9	759	AP	1			0	0.9945	0.2718	0.0426	0	0		0.0364	0	0	0	0.0185	0	0.1189	0	0.0331	0.1002	0.1158	0	0	0.0503	0.0212	0	0	0	0	0	0.0403	0.0641	0	0.0292	0.1221	0.0762	0	0.0582	0	0.0322	0	0	0	0	0	0.0709	0.037
CASP9	760	RI	9.2	9.1	9.3	0	0.9982	0.0988	0.0143	0.0313	0.0066	0.0171	0	0.0186	0.0022	0	0.0109	0	0.0077	0	0.0054	0	0.0062	0.0122	0	0.0021	0.0047	0.0296	0.0128	0.0063	0.0107	0.0264	0.0145	0.0171	0.0032	0.0049	0.0165	0.0479	0.028	0.0195	0.0374	0.0085	0	0.0102	0.0319	0.0374	0.0237	0.0074	0.0427
CASP9	761	ES	4:5:6:7	3.2	8	0	1	0.2829	0.0477	0.9632	0.8903	0.8244	0.801	0.8361	0.91	0.967	0.9776	0.9422	0.9712	0.9483	0.9382	0.9081	0.9298	0.9359	1	0.9571	0.9286	0.9048	0.8	0.9688	1	0.9567	0.9636	0.9454	0.9632	0.9427	0.9061	0.9385	1	0.9711	0.8224	0.9595	0.976	0.9772	0.9625	0.9303	0.9539	0.9432	1
CASP9	762	AD	3.2	3.1	4	0	1	0.0366	0.0034	1	1	1	1	1	1	1	1	1	1	1	1	1	1	1	1	1	1	1	1	1	1	1	1	1	1	1	1	1	1	1	1	1	1	1	1	1	1	1	1
DNAJC16	763	AT	13.3			0	1	0.2285	0.0369	0.0498	0.0549	0.062	0.0135	0.1589	0.0278	0.0637	0.0396	0.0503	0.0656	0	0.0168	0.0415	0.1345	0.0457	0.1448	0.0205	0.0885	0.102	0.0794	0.0443	0.0285	0.0984	0.0303	0.07	0.078	0.1015	0.0478	0.1079	0.1316	0.0418	0.0353	0.022	0.0311	0.027	0.0533	0.0319	0.0212	0.0646	0.0318
DNAJC16	764	AT	16			0	1	0.0992	0.0125	0.0125	0.0104	0.0104	0.0011	0.0213	0.0256	0.0267	0.01	0.0202	0.022	0.0456	0.0254	0.0243	0.0375	0.0115	0.0091	0.0378	0.0071	0.0406	0.0195	0.0116	0.0012	0.011	0.0178	0.0092	0.0176	0.015	0.019	0.0145	0.0441	0.1003	0.0205	0.011	0.0208	0.0362	0.0199	0.0348	0.0355	0.0167	0.0149
DNAJC16	765	AT	15			0	1	0.2754	0.0408	0.9377	0.9347	0.9276	0.9854	0.8198	0.9465	0.9097	0.9504	0.9294	0.9124	0.9544	0.9578	0.9342	0.828	0.9429	0.8461	0.9417	0.9045	0.8575	0.9011	0.9441	0.9703	0.8906	0.9519	0.9208	0.9044	0.8836	0.9332	0.8776	0.8243	0.8579	0.9442	0.967	0.9481	0.9368	0.9268	0.9333	0.9433	0.9187	0.9533
DNAJC16	766	AD	13.2	13.1	14	0	0.9109	0.3156	0.0455	0.1195	0	0	0	0	0	0	0	0	0	0	0.0324	0	0	0.0516	0	0	0	0	0	0	0.0699	0	0	0	0	0.0213	0	0	0		0.0613	0	0.0644	0.1026	0.0972	0.085	0.0812	0	0
PLEKHM2	767	ES	7	6	8	0	1	0.6654	0.1242	0.9667	0.8195	0.92	0.8201	0.709	0.8535	0.8239	0.7042	0.7462	0.6216	0.7635	0.377	0.4714	0.6225	0.7927	0.6021	0.8321	0.6997	0.5855	0.8433	0.558	0.879	0.8896	0.7246	0.6432	0.8557	0.8016	0.658	0.5055	0.7619	0.6754	0.415	0.773	0.5874	0.681	0.6565	0.8246	0.8312	0.7762	0.7732
FBLIM1	768	AP	5.1			0	0.9891	0.5427	0.0963	0	0		0	0	0.2023	0.2022	0.086	0	0	0	0	0	0	0	0.5107	0	0	0	0.2335	0.1189	0.207	0	0.0795	0	0.1567	0	0.0758	0	0.0897	0	0.0994	0.0905	0.1059	0	0.068	0	0.0495	0	0.1041
FBLIM1	769	AP	3			0	0.9891	0.9688	0.2161	0.3619	0.4063		0.7419	0.1956	0.6056	0.6537	0.6281	0.5296	1	0.5315	0.8472	1	1	0.7566	0.4893	0.7554	0.5499	0.8759	0.4893	0.6551	0.793	0.7554	0.6186	0.2052	0.7019	0.6086	0.7081	0.9032	0.6121	0.9155	0.7307	0.8235	0.8941	0.5531	0.8368	0.8062	0.5274	0.6866	0.6981
FBLIM1	771	AP	1			0	0.9891	0.9688	0.2236	0.6381	0.5937		0.2581	0.8044	0.1922	0.1441	0.2859	0.4704	0	0.4685	0.1528	0	0	0.2434	0	0.2446	0.4501	0.1241	0.2773	0.226	0	0.2446	0.302	0.7948	0.1414	0.3914	0.2161	0.0968	0.2982	0.0845	0.1699	0.086	0	0.4469	0.0951	0.1938	0.4231	0.3134	0.1978
FBLIM1	772	AT	11			0	1	0.4263	0.0606	0.8494	0.8362	0.8372	0.871	0.7468	0.8099	0.7919	0.8577	0.8985	0.7036	0.893	0.782	0.8454	0.6357	0.8152	0.8435	0.8293	0.8082	0.7863	0.8243	0.842	0.7958	0.7524	0.8336	0.8659	0.9281	0.8071	0.771	0.7065	0.724	0.5129	0.836	0.8704	0.8785	0.8473	0.8565	0.8084	0.7823	0.834	0.7907
FBLIM1	773	AT	9.2			0	1	0.4263	0.0606	0.1506	0.1638	0.1628	0.129	0.2532	0.1901	0.2081	0.1423	0.1015	0.2964	0.107	0.218	0.1546	0.3643	0.1848	0.1565	0.1707	0.1918	0.2137	0.1757	0.158	0.2042	0.2476	0.1664	0.1341	0.0719	0.1929	0.229	0.2935	0.276	0.4871	0.164	0.1296	0.1215	0.1527	0.1435	0.1916	0.2177	0.166	0.2093
FBLIM1	774	ES	06:07:00	5.2	8	0	1	0.1167	0.0163	0.933	0.983	1	0.9935	1	0.9411	0.9519	0.9687	0.9784	0.9538	0.9738	1	1	1	0.9469	0.8833	0.9852	0.9658	0.9446	1	0.9868	0.979	0.9577	0.9806	0.9848	0.9606	0.9825	0.9713	0.9811	0.9625	1	0.995	0.9921	0.9812	1	0.981	0.9884	0.9759	0.9825	0.9874
FBLIM1	775	AA	4.1	3	4.2	1	0.9655	0.6409	0.0945	0.492	0.5206		0.358	0.4466	0.4207	0.5636	0.3293	0.4647	0.3262	0.7439	0.3089	0.1827	0.4153	0.5768		0.4014	0.3802	0.257	0.5573	0.5728	0.5546	0.492	0.597	0.5289	0.4092	0.4466	0.3446	0.4255	0.424	0.2875	0.4663	0.492	0.3321	0.3826	0.3672	0.5026	0.5223	0.45	0.5476
ZBTB17	778	AA	14.1	13	14.2	0	0.9982	0.2562	0.0419	0.2562	0.0767	0	0.0256	0.0797	0.0661	0.14	0.0535	0.1504	0.1042		0.131	0.0342	0.1548	0.1195	0.1042	0.0726	0.0484	0.055	0.0851	0.0248	0.1289	0.0589	0.1596	0.078	0.097	0.0526	0.0418	0.0391	0.0773	0.1215	0.1004	0.1098	0.1069	0.0267	0.061	0.1867	0.068	0.0553	0.1963
ZBTB17	779	RI	9.2	9.1	9.3	0	0.9964	0.4803	0.0917	0.0482	0.2406		0.0126	0.0917	0.1001	0.065	0.0736	0.0736	0.222	0.1926	0.0691	0.0326	0.1938	0.1268		0.0077	0.0621	0.0894	0.0724	0.0797	0.227	0.1141	0.0849	0.1339	0.1031	0.0832	0.121	0.2836	0.1838	0.0476	0.0705	0.1012	0.0319	0.1146	0.3492	0.1495	0.3222	0.1843	0.221
ZBTB17	780	AA	5.1	4	5.2	0	0.9836	0.2308	0.0361	0	0		0.063	0.0135	0	0.0453	0	0	0.028		0.048	0.0453	0.0867	0.037		0.063	0.0867	0.2269	0.1034	0	0.0571	0.113	0.029	0.0379	0.0271	0.0153	0.0134	0.0397	0.0189	0.0558	0.0327	0	0	0.029	0.1206	0.0545	0.1034	0.023	0
ZBTB17	782	ES	4	3	5.2	0	0.9982	0.1256	0.0238	1	0.9459		0.9791	0.9618	1	0.9667	0.9859	1	1	1	1	1	0.9617	0.9727	1	0.9708	0.9566	0.9231	0.9446	0.9426	1	0.9836	0.9798	0.987	0.9778	0.986	0.9599	0.9667	1	1	0.9779	0.9767	1	1	0.9293	0.944	0.9753	1	0.9311
ZBTB17	784	ES	3	2	4	0	1	0.1426	0.0224	1	0.9751	1	1	0.9237	0.9091	1	1	1	1	1	0.9705	1	1	1	1	1	0.969	1	1	0.975	1	1	1	0.983	0.9821	0.9663	0.9941	1	0.9826	0.9051	0.9685	1	0.9565	1	0.9598	0.9343	0.9526	1	1
HSPB7	787	AT	3			0	0.98	0.3756	0.0196	0	0	0	0	0	0	0	0	0		0	0	0	0	0	0	0	0	0	0	0	0	0	0	0	0	0	0	0	0	0	0	0	0	0	0	0	0	0	0
HSPB7	788	AT	5			0	0.98	0.3756	0.0196	1	1	1	1	1	1	1	1	1		1	1	1	1	1	1	1	1	1	1	1	1	1	1	1	1	1	1	1	1	1	1	1	1	1	1	1	1	1	1
SZRD1	802	RI	5.2	5.1	5.3	0	1	0.0072	0.0008	1	1	1	1	1	1	1	1	1	0.9974	1	1	1	1	1	1	1	1	1	1	1	1	1	1	1	1	1	1	1	1	1	1	1	1	1	1	1	1	1	1
SZRD1	803	AA	4.1	3	4.2	0	1	0.5619	0.076	0.5804	0.7788	0.649	0.7224	0.6161	0.6305	0.7039	0.5991	0.7541	0.7077	0.9208	0.6656	0.6332	0.5055	0.6479	0.6115	0.6115	0.7157	0.6673	0.5784	0.6275	0.6735	0.5269	0.7677	0.687	0.6218	0.6355	0.6326	0.6503	0.6479	0.5804	0.6824	0.6686	0.6204	0.6748	0.6462	0.703	0.7301	0.7132	0.6881
SZRD1	804	ES	2	1	3	0	0.9909	0.0442	0.0078	0	0.0176	0.0233	0	0	0.0171	0.0082	0.0041	0	0.0047		0	0	0.0115	0	0	0	0.0028	0	0	0.0168	0	0.0085	0	0	0.0053	0.0036	0.0075	0.0168	0.0107	0.0442	0.0073	0	0.0239	0.0115	0	0.0062	0.0079	0	0
SZRD1	805	ES	02:03:00	1	4.1	0	1	0.024	0.0038	0	0.0064	0.0236	0	0	0.0053	0.0027	0.0016	0	0.0018	0	0	0	0.0041	0	0	0	0.0014	0	0	0.0051	0	0.0023	0	0	0.0034	0.0011	0.0031	0.0059	0.006	0.0157	0.0022	0	0.0079	0.0034	0	0.0023	0.0074	0	0
SZRD1	806	ES	3	1	4.1	0	1	0.4617	0.083	0.252	0.3129	0.6302	0.39	0.2979	0.2701	0.2957	0.3451	0.3866	0.327	0.3307	0.3111	0.2592	0.2923	0.3081	0.3417	0.4476	0.3809	0.3886	0.3302	0.3159	0.3385	0.2638	0.4758	0.4748	0.4505	0.303	0.3382	0.3534	0.4162	0.2973	0.2979	0.4068	0.2859	0.3013	0.2895	0.3332	0.5809	0.4547	0.3303
SZRD1	807	ES	00:03:04.100000	1	4.2	0	0.9964	0.0271	0.0043	0	0.0098		0	0	0.0049	0.0034	0.0017	0	0.002	0	0	0	0.0055	0	0	0	0.0012	0	0	0.0086	0	0.0032	0	0	0.0036	0.0012	0.0029	0.0068	0.0055	0.0119	0.0025	0	0.0065	0.0042	0	0.0025	0.0083	0	0
SZRD1	808	ES	00:03:04.100000	1	4.2	0	1	0.6065	0.0904	0.3005	0.4076	0.7859	0.3685	0.4303	0.2524	0.3405	0.3541	0.3695	0.3497	0.2265	0.3479	0.3331	0.3503	0.324	0.3993	0.3817	0.3408	0.3794	0.3738	0.4355	0.402	0.3331	0.5097	0.487	0.4614	0.3022	0.3203	0.3848	0.3899	0.2392	0.3267	0.4743	0.2446	0.3428	0.3542	0.3451	0.6034	0.5462	0.3909
SZRD1	809	AA	4.1	1	4.2	0	1	0.3794	0.0547	0.5577	0.5991	0.6806	0.4744	0.6378	0.4744	0.5488	0.5071	0.479	0.5225	0.3695	0.5388	0.5854	0.5636	0.5156	0.5588	0.4296	0.4538	0.4875	0.545	0.6229	0.5651	0.5795	0.5311	0.5094	0.5083	0.4964	0.477	0.531	0.4699	0.4237	0.5305	0.5654	0.4443	0.5447	0.5708	0.5105	0.5205	0.5878	0.5628
SZRD1	810	ES	02:03:00	1	4.2	0	0.9964	0.0119	0.002	0	0.0027		0	0	0.0028	0.0014	0.0011	0	0.0008	0	0	0	0.0052	0	0	0	0.0005	0	0	0.005	0	0.0028	0	0	0.0021	0.0006	0.0016	0.0036	0.0029	0.0084	0.0011	0	0.0039	0.002	0	0.001	0.003	0	0
SZRD1	811	ES	3	1	4.2	0	1	0.6383	0.0758	0.2349	0.1619	0.6626	0.1815	0.3176	0.1637	0.1768	0.2663	0.1589	0.1801	0.0243	0.2095	0.2225	0.3428	0.2049	0.2946	0.2795	0.1688	0.2316	0.3009	0.3117	0.2437	0.3072	0.2373	0.2996	0.3401	0.1973	0.213	0.2496	0.2557	0.1835	0.1824	0.3066	0.1638	0.1991	0.2288	0.1804	0.3574	0.3235	0.2234
NECAP2	821	RI	9.3	9.2	9.4	0	1	0.0378	0.0071	0.9637	0.9822	0.9788	0.9863	0.981	0.9813	0.9921	0.984	0.9815	0.9865	0.984	0.9882	0.9847	0.9705	0.9841	0.9886	0.9827	0.9883	0.9909	0.9936	0.9878	0.9967	0.9937	0.9965	0.9878	0.983	0.9885	0.9819	0.9851	0.9826	0.9837	0.9732	0.9868	0.9806	0.9705	0.991	0.9853	0.993	0.9821	0.9887
NECAP2	822	RI	9.2:9.3:9.4	9.1	9.5	0	1	0.036	0.0061	0.9925	0.9966	0.9898	0.9974	0.9944	0.9859	0.9916	0.9937	0.9928	1	0.9885	0.9907	0.9915	0.9866	0.995	1	0.9909	0.9847	0.9876	0.9924	0.9891	0.9962	0.9883	0.9926	0.9889	0.9897	0.9894	0.9912	0.9851	0.9889	0.9775	0.9943	0.9915	0.9878	0.9911	0.9872	0.9861	0.9857	0.9893	0.9971
NECAP2	823	ES	9.2:9.4	9.1	9.5	0	0.96	0.8653	0.1741	0.8493	0.8489	0.675	0.8478	0.7913	0.583	0.5053	0.741	0.7246	1	0.5922	0.5747	0.6559	0.7062	0.7788	1	0.6879	0.4489	0.4362	0.4696	0.5535		0.3628	0.3462	0.5348	0.6432	0.5267	0.6838	0.5341	0.6369	0.4346	0.8267	0.6371	0.6328	0.789	0.4468	0.5351	0.3528	0.6651	0.8054
NECAP2	824	ES	8	7	9.1	0	1	0.075	0.0123	0.9952	0.9825	0.9702	0.949	0.9695	0.9773	0.9824	0.9909	0.9686	0.9855	0.9566	0.9845	0.9748	0.9519	0.9633	0.9359	0.9842	0.9561	0.9619	0.9671	0.974	0.9617	0.9745	0.9941	0.9801	0.9829	0.972	0.9654	0.9687	0.9874	0.99	0.9841	1	0.9616	0.9764	0.9418	0.983	0.9878	0.9572	0.9946
NECAP2	825	ES	6	5	7	0	1	0.1149	0.0155	0.0106	0	0.0041	0.0044	0.004	0.0091	0.0085	0.0056	0.0058	0.0113	0	0.0075	0.0018	0.0302	0	0	0.0207	0.0133	0.0135	0.0148	0.0285	0.0069	0.0092	0.0136	0.0092	0.0025	0.0173	0.0171	0.0294	0.0092	0.0226	0.0469	0.0025	0.0073	0	0.0821	0.0077	0	0.0091	0.0139
NECAP2	826	ES	4	3	5	0	1	0.0127	0.0016	1	1	1	1	1	1	0.9971	1	1	1	1	1	1	1	0.9964	1	1	1	1	1	1	1	1	1	1	1	1	1	1	1	1	1	1	1	1	1	1	1	1	0.9963
NECAP2	827	ES	2	1.2	3	0	1	0.0183	0.003	1	1	1	0.9928	1	1	1	0.9957	1	1	1	1	1	1	1	1	1	1	1	1	0.9882	1	1	1	1	1	1	1	1	1	1	1	1	1	1	1	0.9954	1	0.9961	1
NECAP2	828	AD	1.2	1.1	2	0	0.9982	0.0266	0.0053	0.9892	0.9892		1	0.9978	1	0.9895	1	1	1	1	1	1	1	1	0.9756	0.9866	1	1	1	1	0.9839	0.9928	0.9884	1	0.9952	1	0.9829	0.979	1	0.982	1	0.9863	1	1	1	1	0.9894	0.9949	1
NBPF1	830	AP	1			0	0.9782	0.8609	0.1314		0.421	0.3459	0.5217	0.5108	0.7211	0.8716	0.6718	0.5339	0.5925		0.795	0.6808	0.6213	0.5399	0.6597	0.4506	0.6994	0.795	0.4368	0.4091	0.8367	0.5693	0.6521	0.6652	0.806	0.8434	0.7465	0.7079	0.8065	0.4538	0.7201	0.3677	0.7116	0.6468	0.6807	0.7785	0.6934	0.8335	0.6328
NBPF1	831	AP	3			0	0.9782	0.8609	0.1314		0.579	0.6541	0.4783	0.4892	0.2789	0.1284	0.3282	0.4661	0.4075		0.205	0.3192	0.3787	0.4601	0.3403	0.5494	0.3006	0.205	0.5632	0.5909	0.1633	0.4307	0.3479	0.3348	0.194	0.1566	0.2535	0.2921	0.1935	0.5462	0.2799	0.6323	0.2884	0.3532	0.3193	0.2215	0.3066	0.1665	0.3672
NBPF1	835	ES	25	24	26	0	0.9945	0.336	0.0552	0.7358	0.88	1	1	0.9638	0.9607	0.8998	1	0.7716	0.9166	0.8118	0.9124	0.8998	0.9766	0.9531	0.9096	1	0.9538	1	0.8358	0.8899	1	0.8132	0.9656	0.9843	0.9542	0.8961	0.948	0.9755	0.8742	1	0.9603	0.9066	0.9818	1	0.9646	0.9749	0.6979	0.9014	0.9651
NBPF1	836	ES	10:11:12:13:14:15	9	16	0	0.9982	0.6665	0.101	0.6641	0.8078	0.7755	0.8986	0.6306	0.9439	0.9437	0.703	0.7397	0.8338	1	0.8079	0.8966	0.7928	0.7823	0.7796	0.8601	0.8701	0.7803	0.7691	0.8525	0.8519	0.6818	0.7935	0.844	0.7971	0.6658	0.7715	0.7931	0.777	0.8784	0.7927	0.5175	0.9177	0.7792	0.6023	0.8093	0.5822	0.9284	0.7565
MFAP2	839	AA	3.1	2	3.2	0	0.9964	0.3645	0.0487	0.9372	0.9004	0.6355	0.8343	0.8604	0.9154	0.8532	0.791	0.7896	0.9356	0.9469	0.738	0.8182	0.8203	0.8462	0.739	0.8095	0.8532	0.7606	0.7385	0.8343	0.7617	0.8497	0.8609	0.9232	0.8009	0.7357	0.8288	0.8674	0.8196	0.8438	0.8958	0.8824	0.7863	0.8323	0.9063	0.8626	0.8378	0.846	0.8761
ATP13A2	840	ES	28	27	29	0	0.9982	0.1674	0.0263	1	0.9708		0.9885	0.9842	0.9437	0.8404	0.9694	0.9877	0.9603	0.8565	0.9371	0.9574	0.9653	0.9552	0.9598	0.9693	0.9723	0.9748	0.9704	0.9137	0.9426	0.9878	0.9541	0.9561	0.9853	0.9742	0.9634	0.9267	0.9083	0.9696	0.9877	0.9465	0.9861	0.9485	0.9443	0.9842	0.9388	0.9625	0.9707
ATP13A2	841	ES	22	21	23	0	0.9982	0.1082	0.0137	1	0.9873		1	1	1	0.9746	0.9737	1	0.9775	1	1	1	0.9553	0.9627	0.972	1	0.9916	0.9939	0.9911	0.991	0.9907	0.9944	0.995	0.9946	1	0.9941	1	0.9756	1	0.9957	0.9966	0.9947	0.9958	0.9835	1	1	0.9684	0.9857	0.9868
ATP13A2	842	AD	5.2	5.1	6	0	0.9909	0.6355	0.0871	0.392	0.6203		0.6231	0.641	0.7481	0.6482	0.5141	0.6099	0.5231	0.4293	0.6825		0.5512	0.6165	0.5341	0.5324	0.6061	0.5341	0.5141	0.641	0.7831	0.484	0.5773	0.5528	0.5397	0.6137	0.5186	0.7348	0.7394	0.5845	0.6534	0.5029	0.4828	0.4623	0.606	0.5008	0.4989	0.5724	0.6592
PADI2	843	AT	11.2			0	1	0.3235	0.0325	0.1178	0	0	0.0324	0.0022	0.0147	0	0	0.1374	0	0.1132	0	0.0113	0	0	0	0	0	0.0201	0.0195	0.0838	0	0.0147	0.0278	0.0651	0	0	0	0.0446	0	0.0886	0.0151	0.0237	0.0187	0.0067	0	0	0.0896	0.0089	0.0148
PADI2	844	AT	16			0	1	0.3235	0.0325	0.8822	1	1	0.9676	0.9978	0.9853	1	1	0.8626	1	0.8868	1	0.9887	1	1	1	1	1	0.9799	0.9805	0.9162	1	0.9853	0.9722	0.9349	1	1	1	0.9554	1	0.9114	0.9849	0.9763	0.9813	0.9933	1	1	0.9104	0.9911	0.9852
PADI2	846	ES	05:06:00	4	7	0	0.7709	0.019	0.0012				1	1	1	1	1		1		1	1	1	1	1		1	1	1			1	1	1	1	1	1	1	1		1	1	1	1		1	1	1	1
PADI4	851	AT	17			0	0.9945	0.8864	0.203	0.5407	0	0.0936	0.0409	0.0409	0.1035	0.3117	0.0959	0.4952	0.0983	0.1229	0.0634	0.1405	0.0239	0.1405		0.0517	0.7902	0.1192	0.347	0.0561	0.0855	0.197	0.3291	0.1514	0.6456	0.0339	0.164	0.2762	0.1383	0.012	0.0914	0.4767	0.1092	0.6205	0	0.478	0.0614	0.2464	0.3883
PADI4	852	AT	4			0	0.9945	0.8864	0.203	0.4593	1	0.9064	0.9591	0.9591	0.8965	0.6883	0.9041	0.5048	0.9017	0.8771	0.9366	0.8595	0.9761	0.8595		0.9483	0.2098	0.8808	0.653	0.9439	0.9145	0.803	0.6709	0.8486	0.3544	0.9661	0.836	0.7238	0.8617	0.988	0.9086	0.5233	0.8908	0.3795	1	0.522	0.9386	0.7536	0.6117
RCC2	853	AP	2.1			0	0.9945	0.5056	0.0805	0	0.1698	0	0.1023	0.3094	0	0.1947	0.0525	0	0.1783		0.0767	0.1506	0.0609	0.0418	0	0	0.0564	0.1773	0.1677	0	0.1096	0.0418	0	0.1124	0.141	0.0491	0.1265	0.2392	0.1253	0.1976	0.044	0	0.0245	0.0732	0.1719	0.1527	0.1163	0.0176	0.0438
RCC2	854	AP	1			0	0.9945	0.5056	0.0805	1	0.8302	1	0.8977	0.6906	1	0.8053	0.9475	1	0.8217		0.9233	0.8494	0.9391	0.9582	1	1	0.9436	0.8227	0.8323	1	0.8904	0.9582	1	0.8876	0.859	0.9509	0.8735	0.7608	0.8747	0.8024	0.956	1	0.9755	0.9268	0.8281	0.8473	0.8837	0.9824	0.9562
ARHGEF10L	855	AP	1			0	0.8018	1	0.2222	0.5273	0.6373		0.3622	0.3553	0.1633	0.7575	0.6613		0.3424		0.5554		0.1412	0.6333		0.7785	0.8024	0.5158				0.2356	0.4911	0.8652	0.6756	0.6792	0.6303	0.6735	0.6713		0.6588		0.7785	0.4939		0.5339	0.4385	0.4555	0.5033
ARHGEF10L	857	AP	4.1			0	0.8018	0.3815	0.059	0	0		0	0	0	0	0		0		0		0	0.1929		0	0	0.2199				0.1005	0.1495	0.0709	0	0.1034	0.1679	0.1305	0		0		0	0		0	0	0	0.1341
ARHGEF10L	858	AP	10			0	0.8018	1	0.2261	0.4727	0.3627		0.6378	0.6447	0.8367	0.2425	0.3387		0.6576		0.4446		0.8588	0.1738		0.2215	0.1976	0.2642				0.6639	0.3594	0.0639	0.3244	0.2174	0.2018	0.196	0.3287		0.3412		0.2215	0.5061		0.4661	0.5615	0.5445	0.3626
ARHGEF10L	859	AT	22			0	1	0.2905	0.0401	0	0.0565	0.115	0	0.0596	0.0452	0.0541	0.0597	0.0387	0.1055	0	0.0127	0.0714	0.1266	0.0706	0	0.0107	0.0509	0.042	0.0584	0.0152	0.0177	0.1412	0.0712	0.0507	0	0.0235	0.0804	0.0564	0.046	0.0187	0.0749	0.0363	0.0178	0.0152	0.0672	0.0487	0.1347	0.0483	0.0157
ARHGEF10L	860	AT	30			0	1	0.0941	0.0066	0	0	0	0	0	0	0	0	0	0	0	0	0	0	0	0	0	0	0	0	0	0	0	0	0	0	0	0	0	0	0	0	0	0	0	0	0	0	0	0
ARHGEF10L	861	AT	32			0	1	0.2905	0.0409	1	0.9435	0.885	1	0.9404	0.9548	0.9459	0.9403	0.9613	0.8945	1	0.9873	0.9286	0.8734	0.9294	1	0.9893	0.9491	0.958	0.9416	0.9848	0.9823	0.8588	0.9288	0.9493	1	0.9765	0.9196	0.9435	0.954	0.9813	0.9251	0.9637	0.9822	0.9848	0.9328	0.9513	0.8653	0.9517	0.9843
ARHGEF10L	862	ES	18	17	19	0	0.9564	0.7966	0.1666	0.8856	0.7206		0.6436	0.7314	0.518	0.8254	0.7206	1	0.6825		0.6323	0.8856	0.6075	0.6542		0.8449	0.8817	0.709	0.9149	0.6736	0.8731	0.5052	0.6713	0.9713	0.8731	0.7535	0.8731	0.6909	0.6323	0.8731	0.8724	0.9179	0.7747	0.7543	0.7936	0.6963		0.7936	0.7365
ARHGEF10L	863	ES	14:15:00	13	16	0	0.9982	0.1842	0.012	1	1	1	1	1	1	1	1	1	1	1	1	1	1	1	1	1	1	1	1	1	1	1	1	1	1	1	0.9882	0.9648	1	1	1	1	1	1	1	1	1	1	1
ARHGEF10L	864	ES	8	7	9	0	0.82	0.1048	0.0137	0	0			0		0	0	0		0	0			0		0	0.0166	0	0	0	0	0	0	0		0.0166	0	0	0	0.0215	0.021	0	0	0.0328		0	0	0	0
ALDH4A1	868	AP	1			0	0.9182	0.4292	0.0496		1		0.8889	0.962	1	1	1	1	0.8333		1	1	1	1		1	0.9942	1	1	1	1	1	1	1	1	0.9565	0.9757	1	1	0.973	1	1	1	0.9091	0.953	1	1	1	1
ALDH4A1	869	AP	2			0	0.9182	0.4292	0.0496		0		0.1111	0.038	0	0	0	0	0.1667		0	0	0	0		0	0.0058	0	0	0	0	0	0	0	0	0.0435	0.0243	0	0	0.027	0	0	0	0.0909	0.047	0	0	0	0
ALDH4A1	870	RI	16.2	16.1	16.3	0	1	0.0537	0.0075	1	1	1	0.97	0.9943	0.9925	1	0.9945	1	1	1	1	0.9943	1	1	1	0.9734	0.991	0.9886	1	0.9845	1	1	0.9916	0.9957	1	0.9922	0.9892	1	0.9933	1	0.9891	0.9853	1	0.9932	0.9963	1	1	1	1
ALDH4A1	871	ES	13	12	14	0	1	0.2812	0.0454	1	1	1	1	0.9536	0.9749	0.9695	0.8777	1	0.9054	0.9082	1	0.8719	1	0.9583	0.9102	0.9379	0.9455	0.9373	1	0.8626	0.9738	0.9546	0.9868	0.973	0.9496	1	0.9495	0.9876	0.9678	1	0.9846	0.9562	1	0.9159	0.9516	1	0.8836	0.9438	0.9421
UBR4	872	AP	74.1			0	1	0.8002	0.0995	0.1164	0.1543	0.1945	0.4015	0.1823	0.1172	0.4663	0.3347	0.2993	0.2769	0.3406	0.4627	0.1648	0.3788	0.1846	0.2286	0.2197	0.272	0.2566	0.3282	0.2952	0.3286	0.2327	0.1535	0.2248	0.1155	0.2014	0.3176	0.3215	0.2511	0.8289	0.2165	0.5419	0.4187	0.3175	0.1496	0.1264	0.174	0.1674	0.3921
UBR4	875	AP	103.1			0	1	0.8658	0.1283	0.8127	0.1205	0.2845	0.256	0.3483	0.6217	0.2629	0.3882	0.3928	0.2469	0.4705	0.1314	0.4554	0.1369	0.2239	0.1579	0.0979	0.1737	0.2924	0.2939	0.3707	0.2736	0.3073	0.2944	0.241	0.1696	0.299	0.463	0.3738	0.0883	0.0842	0.0752	0.2931	0.0868	0.1799	0.2483	0.2587	0.2589	0.287	0.3109
UBR4	876	AP	86.1			0	1	0.7537	0.1281	0.0645	0.6921	0.4759	0.3426	0.4076	0.1872	0.1583	0.2522	0.249	0.377	0.1889	0.2015	0.3797	0.446	0.4495	0.163	0.3892	0.1195	0.4363	0.354	0.3189	0.3445	0.4112	0.4681	0.402	0.4446	0.3101	0.1965	0.286	0.5142	0.0601	0.2375	0.1521	0.2264	0.4063	0.5559	0.4674	0.5011	0.4925	0.2836
UBR4	877	AP	1			0	1	0.6777	0.1226	0.0064	0.033	0.0451	0	0.0617	0.0739	0.1125	0.0249	0.059	0.0992	0	0.2044	0	0.0383	0.1419	0.4504	0.2932	0.4347	0.0148	0.0239	0.0151	0.0532	0.0487	0.084	0.1322	0.2703	0.1895	0.0229	0.0188	0.1464	0.0267	0.4708	0.0129	0.2681	0.0962	0.0461	0.1476	0.0659	0.0531	0.0134
UBR4	878	AT	107			0	1	0.0994	0.0133	0.9858	0.9586	0.967	0.9647	0.973	0.9688	0.9549	0.9668	0.9506	0.9404	0.9764	0.9734	0.9787	0.9443	0.9654	0.9692	0.9562	0.9634	0.9722	0.9675	0.9586	0.9496	0.9609	0.9582	0.9565	0.9705	0.9692	0.9659	0.9695	0.9544	0.8957	0.938	0.9775	0.9712	0.9745	0.9752	0.9575	0.9652	0.9648	0.9612
UBR4	879	AT	78.6			0	1	0.0994	0.0133	0.0142	0.0414	0.033	0.0353	0.027	0.0312	0.0451	0.0332	0.0494	0.0596	0.0236	0.0266	0.0213	0.0557	0.0346	0.0308	0.0438	0.0366	0.0278	0.0325	0.0414	0.0504	0.0391	0.0418	0.0435	0.0295	0.0308	0.0341	0.0305	0.0456	0.1043	0.062	0.0225	0.0288	0.0255	0.0248	0.0425	0.0348	0.0352	0.0388
UBR4	880	ES	105	104	106	0	1	0.0227	0.0044	0.0017	0	0	0	0.0076	0.0197	0.0051	0.0029	0	0.0077	0	0	0	0.0074	0.014	0	0	0.0026	0.0117	0.0101	0.0109	0	0	0	0	0.0052	0	0.0065	0	0.0054	0.0058	0	0	0	0	0.0179	0.0047	0	0	0
UBR4	881	ES	94	93	95	0	1	0.0802	0.0153	1	0.9864	1	0.9801	1	0.9727	0.9439	0.9807	0.986	0.97	1	1	0.9414	1	0.9749	0.9377	0.9963	0.9793	0.9649	0.9799	0.958	0.9776	1	0.9669	0.9684	0.9542	0.9836	0.9765	0.9501	0.9874	0.9629	0.9813	0.9893	1	0.99	0.9598	0.9811	0.9877	0.9863	0.961
UBR4	882	ES	90	89	91	0	1	0.0229	0.002	1	1	1	1	1	1	1	1	1	1	1	1	1	1	1	1	1	1	1	1	1	1	1	1	1	1	1	1	1	1	1	1	1	1	1	1	1	1	1	0.9917
UBR4	883	RI	78.4	78.3	78.5	0	0.9764	0.2447	0.0296	0.2447	0.0484	0.0696	0	0.0883	0	0.0151	0.0118	0.0195	0.0113		0.0057	0	0.0418	0	0	0.0105	0.0046	0.0129	0.0251	0.0137	0.0277	0.0461	0.0076	0.0475	0.0188	0	0.0153	0.0229	0.0174	0.0719	0.0067		0.0084	0	0.0972	0	0.0068	0.0181	0.0173
UBR4	884	RI	78.2	78.1	78.3	0	0.9782	0.0288	0.003	0	0	0	0	0	0	0	0	0	0	0	0		0.0078	0	0	0	0	0	0	0	0	0	0	0	0	0	0	0	0	0	0	0	0	0	0	0	0	0	0
UBR4	885	ES	60	59	61	0	0.9855	0.3197	0.0502		0.9159		0.9054	0.9604	1	0.9265	0.9564	0.9265	0.9719	1	0.8845	1	1	1	0.8019	0.9726	0.9478	0.929	0.9196	0.9526	0.7286	0.9581	0.8449	1	0.9065	0.914	0.9806	0.9504	0.9107	0.8207	0.8653	0.8673	0.9165	1	1	0.9373	1	0.9261	1
UBR4	886	ES	54	53	55	0	0.9527	0.5057	0.0735		0.1299	0.2463	0.2657	0.0522	0.1248	0.1729	0.2949	0	0.066	0.1885	0.1852		0.1356	0.0454	0.1484	0.1174	0.0956	0.1268	0.183	0.1248	0.1729	0.2168	0.0772	0.0665	0.2634	0.1674	0.1993	0.2072	0.1131	0.1674	0.1012		0.1562	0.0522	0.1275	0.1248	0.1062	0.0747	0.0387
UBR4	887	ES	50	49	51	0	0.88	0.1406	0.0192		0			0	0	0	0		0.0324		0		0	0	0	0.0324	0.0121	0	0	0	0	0.1406	0	0	0	0	0	0	0	0	0		0.0331		0	0	0.0894	0	0
EMC1	891	AA	10.1	9	10.2	0	0.9964	0.3907	0.0562	0.6595	0.8714	0.8115	0.7948	0.8094	0.8795	0.8464	0.7439	0.8411	0.8373	0.8288	0.8021	0.8331	0.8207	0.8868	0.8328	0.8552	0.8646	0.6992	0.9162	0.8178	0.7533	0.7541	0.8319	0.9281	0.7049	0.7863	0.8047	0.8175	0.7415	0.7286	0.8825	0.6449	0.7998	0.9064	0.8051	0.8857	0.7657	0.8354	0.8466
EMC1	893	ES	3	2.1	4	0	1	0.1498	0.0135	1	1	1	0.9877	1	0.9926	1	0.9892	1	0.9914	1	1	1	1	0.9825	1	0.9919	0.9811	1	1	1	0.9917	1	0.9866	1	0.9934	0.9948	0.9938	0.9827	1	1	1	1	0.9936	1	0.9732	0.9572	1	1	1
EMC1	894	AD	2.2	2.1	3	0	0.9964	0.2202	0.0187	0	0	0.01	0.0068	0.049	0.0139	0.0105	0.0048	0.0073	0.012	0	0.0068	0.0087	0.0099	0.0182	0	0.0072	0.0108	0.0149	0.0041	0.0029	0	0.0186	0.0124	0	0	0.0025	0.0117	0.0415	0.0111	0.0175	0.0071	0.0288	0.0197	0	0.0271	0.0046	0	0.0087	0.0056
PQLC2	898	AA	4.1	3	4.2	0	1	0.4007	0.0717	0.9067	0.8294	0.8294	0.8487	0.9089	0.8972	0.8135	0.8794	0.8568	0.8024	0.5993	0.7949	1	0.7397	0.8033	0.7372	0.8178	0.9142	0.9309	0.9559	0.6661	0.8598	0.6661	0.8278	0.847	0.8347	0.8623	0.829	0.8515	0.8916	0.8113	0.8353	0.9218	0.8861	0.8707	0.8734	0.9388	0.6296	0.9024	0.7731
PQLC2	899	ES	2	1.3	3	0	1	0.2699	0.0292	1	0.9799	1	0.9759	0.9045	0.9771	1	0.9598	0.9002	0.917	0.9347	0.9598	1	0.9602	0.9624	1	1	1	1	0.973	0.9406	0.9535	0.9838	0.9673	1	0.9327	0.9372	0.939	0.9532	1	1	0.9885	0.9271	0.89	0.9709	1	0.9641	0.95	0.971	1
PQLC2	900	RI	1.2	1.1	1.3	0	0.9818	0.9811	0.1276		0.5444		0.1374	0.2991	0.4554	0.5227	0.5444	0.4726	0.23	0.1661	0.2161	1	0.27	0.2365	0.6866	0.1322	0.4252	0.5111	0.2584	0.4632	0.2492	0.4842	0.3046	0.4057	0.3599	0.4068	0.4941	0.592	0.1661	0.2529	0.4211	0.3825	0.6712	0.3324	0.3331	0.2098	0.2234	0.4346	0.374
CAPZB	901	AP	1			0	1	0.1344	0.0128	0.9834	0.9869	0.8656	0.9247	0.9875	0.9988	0.9946	0.9877	0.9868	0.9854	0.976	0.9967	0.9943	0.97	0.9909	0.9734	0.9755	0.9934	0.993	0.9732	0.9943	0.9919	0.9836	0.9839	0.9855	0.9907	0.9896	0.9675	0.9582	0.981	0.9888	0.9905	0.9938	0.9928	0.9837	0.9799	0.9809	0.9964	0.9849	0.9902
CAPZB	902	AP	2			0	1	0.1344	0.0128	0.0166	0.0131	0.1344	0.0753	0.0125	0.0012	0.0054	0.0123	0.0132	0.0146	0.024	0.0033	0.0057	0.03	0.0091	0.0266	0.0245	0.0066	0.007	0.0268	0.0057	0.0081	0.0164	0.0161	0.0145	0.0093	0.0104	0.0325	0.0418	0.019	0.0112	0.0095	0.0062	0.0072	0.0163	0.0201	0.0191	0.0036	0.0151	0.0098
CAPZB	903	AP	4.1			0	1	0	0	0	0	0	0	0	0	0	0	0	0	0	0	0	0	0	0	0	0	0	0	0	0	0	0	0	0	0	0	0	0	0	0	0	0	0	0	0	0	0	0
CAPZB	906	ES	11	10	12	0	1	0.1037	0.0147	0.016	0.0108	0.0092	0.0152	0.0213	0.0088	0.0089	0.0068	0.0051	0.0136	0.0074	0.0021	0.0054	0.0183	0.0068	0.0069	0.005	0.0069	0.01	0.011	0.0053	0.003	0.0127	0.0118	0.0052	0.0037	0.0068	0.0051	0.0074	0.0084	0.0056	0.009	0.007	0.0044	0.0052	0.016	0.0098	0.0148	0.0145	0.0219
CAPZB	907	ES	10:11:00	9	12	0	0.9582	0.5362	0.1184	1	1	0.7894	0.845	1	0.8835	1	0.9028	0.5662	0.9007	1		1	0.9072	1	1	1	1	0.9078	0.7821	1		0.9325	0.8445	1	0.8195	0.7596	0.7789	1	0.8921	1	1	0.9	0.7223	1	0.7687	0.9211	1	0.8991	1
CAPZB	908	ES	10	9	12	0	1	0.0067	0.001	1	1	0.998	0.9979	1	0.9992	1	0.9995	0.9979	0.9991	1	0.9993	1	0.9989	1	1	1	1	0.9993	0.9983	1	1	0.9994	0.9986	1	0.9994	0.9987	0.9991	1	0.9993	1	1	0.9995	0.9989	1	0.9978	0.9994	1	0.9989	1
CAPZB	909	ES	3	1	4.2	0	1	0.0065	0.0006	0.0065	0.0007	0.0036	0.0017	0.0002	0.0006	0	0.0002	0.0004	0.0004	0	0.0003	0.0017	0.0017	0.0007	0	0.0009	0.0004	0.0037	0	0.0016	0	0	0	0	0.001	0.0005	0.0008	0.0024	0.0003	0.0018	0.0003	0	0	0	0.0011	0.0003	0.0006	0	0
NBL1	911	AP	1			0	0.9909	0.3745	0.0485	0	0		0.0176	0.0594	0.0464	0.0862	0.0372	0	0.0634	0.0257	0.1347	0.1429	0.0627	0.1629	0.0913	0.0366	0.0824	0.0357	0	0	0.0739	0.0747	0.0163	0.0071	0.0111	0.0061	0.0193	0.0243	0.0675	0.0848	0.04	0.058	0.0557	0.0264	0	0.0969	0.0345	0.1657	0
NBL1	912	AP	2			0	0.9909	0.3745	0.0485	1	1		0.9824	0.9406	0.9536	0.9138	0.9628	1	0.9366	0.9743	0.8653	0.8571	0.9373	0.8371	0.9087	0.9634	0.9176	0.9643	1	1	0.9261	0.9253	0.9837	0.9929	0.9889	0.9939	0.9807	0.9757	0.9325	0.9152	0.96	0.942	0.9443	0.9736	1	0.9031	0.9655	0.8343	1
TMCO4	913	AP	2			0	0.9636	0.7758	0.1291	0.6374	0.4606	0.5011	0.4748	0.2316	0.8524	0.3736	0.3857	0.4129	0.395		0.3611	0.4065	0.3201	0.2151	0.4129	0.4507	0.4046	0.5726	0.7655	0.586	0.5011	0.3101	0.3761	0.3053	0.4205	0.4456	0.301	0.4678	0.5261	0.3344	0.5099	0.4411	0.4085	0.395	0.2932	0.3909	0.3344	0.319	0.5345
TMCO4	914	AP	1			0	0.9636	0.7758	0.1291	0.3626	0.5394	0.4989	0.5252	0.7684	0.1476	0.6264	0.6143	0.5871	0.605		0.6389	0.5935	0.6799	0.7849	0.5871	0.5493	0.5954	0.4274	0.2345	0.414	0.4989	0.6899	0.6239	0.6947	0.5795	0.5544	0.699	0.5322	0.4739	0.6656	0.4901	0.5589	0.5915	0.605	0.7068	0.6091	0.6656	0.681	0.4655
TMCO4	915	RI	17.2	17.1	17.3	0	1	0.0547	0.0063	1	1	1	1	1	1	1	0.9912	1	1	1	1	1	0.9878	1	1	1	1	1	1	1	1	1	1	0.995	1	1	1	1	1	1	1	1	1	1	1	1	1	0.989	1
TMCO4	916	ES	11	10	12	0	0.9982	0.5417	0.0544	1	0.9124		1	0.9736	0.8268	0.9791	0.8633	0.9706	0.9766	1	0.9027	1	1	0.9022	1	1	0.9616	0.9052	1	0.963	0.9455	1	1	0.9528	1	1	0.9515	1	1	1	1	0.9677	0.8152	0.9322	0.8966	0.9464	1	0.8997	0.9528
TMCO4	917	ES	3	1	4	1	0.8055	0.8259	0.1443		0.3588			0.4665		0.5437	0.5476	0.492	0.6174		0.4139	0.5183	0.2028	0.5831	0.6827	0.4581	0.4906	0.5183		0.1561		0.3128	0.5476	0.5367	0.5476		0.7602		0.5476	0.5183	0.5998	0.264	0.5665	0.3498	0.4574	0.6665	0.4069	0.5515	0.4116
VWA5B1	923	AT	15			0	1	0.4238	0.0503	1	1	1	1	1	1	1	0.9537	1	0.9693	1	1	1	1	1	1	1	1	1	1	1	1	0.9624	1	0.8822	1	1	1	0.9815	1	0.9196	1	1	1	1	1	1	1	0.9494	0.8399
VWA5B1	924	AT	24			0	1	0.2102	0.0343	0	0	0	0	0	0	0	0.0463	0	0.0307	0	0	0	0	0	0	0	0	0	0	0	0	0.0376	0	0.0321	0	0	0	0.0185	0	0.047	0	0	0	0	0	0	0	0.0506	0.0847
VWA5B1	925	AT	20			0	1	0.2517	0.0263	0	0	0	0	0	0	0	0	0	0	0	0	0	0	0	0	0	0	0	0	0	0	0	0	0.0857	0	0	0	0	0	0.0334	0	0	0	0	0	0	0	0	0.0753
DDOST	932	ES	2	1	3	0	1	0.0121	0.0012	0.9948	1	0.9987	1	0.9988	0.999	1	0.9989	0.9992	1	1	0.9992	1	0.999	1	1	1	0.9995	1	0.9992	0.9983	1	1	0.9971	1	0.9993	1	0.9989	1	0.9985	0.9993	0.9989	1	0.9984	1	1	0.9979	1	0.9985	1
HP1BP3	936	AP	1			0	1	0.6844	0.1248	0.2246	0.3035	0.4745	0.5107	0.1579	0.2758	0.2428	0.2276	0.2106	0.1526	0.4551	0.3884	0.334	0.1198	0.2969	0.5582	0.412	0.4263	0.1018	0.1721	0.2701	0.3802	0.1048	0.1655	0.4153	0.4979	0.293	0.1547	0.1434	0.1645	0.1217	0.1663	0.194	0.4695	0.2816	0.1386	0.135	0.3765	0.2467	0.2236
HP1BP3	937	AP	7.1			0	1	0.7282	0.1529	0.7506	0.5615	0.4635	0.4502	0.8098	0.6145	0.6968	0.73	0.6752	0.7671	0.4997	0.5564	0.5183	0.8066	0.6399	0.2199	0.4228	0.5061	0.8527	0.7594	0.5337	0.5428	0.862	0.7192	0.5053	0.3484	0.5197	0.784	0.7675	0.6637	0.8027	0.7865	0.806	0.443	0.5472	0.8352	0.818	0.5798	0.684	0.6431
HP1BP3	938	AP	2			0	1	0.334	0.0558	0.0248	0.135	0.0621	0.0391	0.0323	0.1097	0.0604	0.0424	0.1142	0.0803	0.0452	0.0552	0.1476	0.0736	0.0632	0.222	0.1652	0.0676	0.0455	0.0684	0.1962	0.077	0.0332	0.1152	0.0794	0.1536	0.1873	0.0613	0.0891	0.1717	0.0756	0.0471	0	0.0875	0.1711	0.0262	0.047	0.0437	0.0692	0.1334
HP1BP3	939	AT	6			0	1	0.2624	0.0467	0.0591	0.0415	0.0377	0.0138	0.083	0.0836	0.0852	0.055	0.1316	0.1442	0.0095	0.0574	0.0143	0.1156	0.0954	0.0094	0.0393	0.0443	0.1024	0.0953	0.0465	0.0482	0.0778	0.1247	0.0235	0.0246	0.0477	0.1158	0.0369	0.0908	0.0564	0.2381	0.0447	0.0335	0.0251	0.1142	0.1359	0.0514	0.0548	0.0311
HP1BP3	940	AT	15			0	1	0.2624	0.0467	0.9409	0.9585	0.9623	0.9862	0.917	0.9164	0.9148	0.945	0.8684	0.8558	0.9905	0.9427	0.9857	0.8844	0.9046	0.9906	0.9607	0.9557	0.8976	0.9047	0.9535	0.9518	0.9222	0.8753	0.9765	0.9754	0.9523	0.8842	0.9631	0.9092	0.9436	0.7619	0.9553	0.9665	0.9749	0.8858	0.8641	0.9486	0.9452	0.9689
EIF4G3	941	AP	1			0	0.8818	0.1668	0.009		1					1	1	1	1					1		1	1				1	1	1	1	1	1	1	1	1	1	1			1	1	1	1	1	1
EIF4G3	945	AP	3			0	0.8818	0.1668	0.009		0					0	0	0	0					0		0	0				0	0	0	0	0	0	0	0	0	0	0			0	0	0	0	0	0
EIF4G3	948	AT	42			0	1	0.0783	0.0123	1	0.9828	1	1	1	1	1	1	1	1	1	1	1	0.9687	0.9888	1	0.9894	0.9828	0.9741	1	1	0.9848	0.9818	0.9548	0.9936	1	1	0.9962	0.9761	1	0.9732	1	0.993	0.9906	1	1	0.9759	0.9636	1	0.9796
EIF4G3	949	AT	18.2			0	1	0.0646	0.0095	0	0	0	0	0	0	0	0	0	0	0	0	0	0.0313	0	0	0.0106	0.0121	0.0259	0	0	0	0.0129	0.0319	0	0	0	0.0038	0.0239	0	0	0	0	0	0	0	0.0132	0.0364	0	0.0204
EIF4G3	950	AT	22.2			0	1	0.0735	0.0067	0	0.0172	0	0	0	0	0	0	0	0	0	0	0	0	0.0112	0	0	0.005	0	0	0	0.0152	0.0053	0.0132	0.0064	0	0	0	0	0	0.0268	0	0.007	0.0094	0	0	0.0109	0	0	0
EIF4G3	951	ES	23	22.1	24	0	0.9945	0.9223	0.093	0.2057	0.373	0.2872	0.1995	0.323	0.2585	0.4232	0.4214	0.2181	0.468	0.4303	0.3219	0.1918	0.3847	0.2251	0.2872	0.3474	0.3923	0.3993	0.3269	0.2365	0.2599	0.2147	0.4047	0.3856	0.3393	0.3264	0.2652	0.3119	0.3297	0.1597	0.2682	0.2466	0.3977	0.4937	0.4804	0.4182	0.2997	0.1838	0.286
EIF4G3	952	ES	18.1	17	19	0	0.9818	0.5465	0.0711	0.1899	0.0929	0.0406	0.0418	0.1052	0.103	0.0427	0.0803	0.0939	0.0884		0.0165	0.0386	0	0.1344	0	0.0517	0.0703	0	0.0982	0.0554	0.0386	0.0655	0.0218	0.0579	0.0717	0.0733	0.0453	0.1355	0.0882	0.0543	0.0553	0.0413	0.0887	0.0725	0.2511	0	0	0.1017	0
EIF4G3	954	ES	17	16.2	19	0	1	0.0686	0.0095	1	0.9901	1	0.9664	1	0.9841	1	1	0.9773	1	1	1	1	1	0.9743	0.9726	1	0.9927	1	1	1	1	0.9752	0.9839	1	0.9711	1	0.9927	1	1	1	1	1	1	0.9847	1	1	1	1	1
EIF4G3	955	ES	16.1:16.2	15	17	0	0.9836	0.3278	0.0375	1	1		1	1	0.9299	1	1	1	1	1	1	1	1	1	1	0.9564	0.978	1	1	1	0.9465	0.972	0.8865	0.9744	1	1	0.9734	0.9524	1	0.7798	0.9919	1	0.9302	1	0.9338	1	1	1	1
EIF4G3	956	ES	16.2	15	17	0	0.9836	0.2971	0.034	1	1	1	1	1	0.9518	1	1	1	1	1	1	1	1	1	1	0.963	0.9793	1	1	1	0.965	0.9718	0.9219	0.9778	1	1	0.979	0.9242	1	0.8604	0.9908	1	0.9776	1	0.9364	1	1	1	1
EIF4G3	957	AA	16.1	15	16.2	0	0.9618	0.8714	0.102	0.492	0.4207		0.3406	0.492	0.404	0.4657	0.6115	0.5573	0.3923	0.492	0.4563	0.4365	0.5214	0.3056	0.1771	0.4587	0.4865	0.5848	0.5875	0.3837	0.3923	0.5031	0.3997	0.4657	0.5447	0.5841	0.4407	0.6221	0.5305	0.3675	0.5311	0.6174	0.2356	0.3675	0.4916	0.4777	0.4404	0.6263	0.5923
EIF4G3	959	ES	11	9	12	0	0.88	0.0823	0.0056		0		0	0	0	0	0	0	0		0		0	0		0	0	0	0	0	0	0	0	0	0	0	0	0	0	0	0		0	0		0	0	0	0
EIF4G3	960	ES	10	9	12	0	0.9109	0.3937	0.0657		0.0427		0.197	0.0731	0	0	0	0.0499	0.197		0.0719		0.0627	0.0627	0.0951	0.0772	0.1388	0.0468	0.0756	0.1554	0.031	0.0783	0	0.0731	0.1709	0.0951	0.0215	0.0393	0.0393	0.1093	0.0522		0.0427	0		0.0415	0.0499	0.0494	0.1283
ECE1	961	AP	1			0	1	0.8775	0.1466	0.1366	0.4074	0	0.6447	0.395	0.6329	0.5403	0.6737	0.5114	0.5499	0.4814	0.4411	0.7598	0.5026	0.5779	0.5794	0.4672	0.754	0.5876	0.6495	0.6668	0.8554	0.5351	0.742	0.4805	0.4345	0.6759	0.6184	0.7089	0.3952	0.7405	0.6169	0.6166	0.6362	0.5864	0.6164	0.3944	0.6213	0.4735	0.463
ECE1	962	AP	3.1			0	1	0.8844	0.0648	0.2168	0.1511	0.8995	0.0576	0.227	0.114	0.1058	0.1017	0.1111	0.1506	0.2492	0.1268	0.0754	0.1113	0.1591	0.1437	0.1205	0.102	0.1435	0.1289	0.0752	0.0424	0.1255	0.1247	0.1492	0.1679	0.0598	0.1258	0.142	0.1568	0.0715	0.143	0.1536	0.104	0.0619	0.1328	0.1761	0.0807	0.1806	0.1203
ECE1	963	AP	2			0	1	0.5558	0.0814	0.5558	0.3126	0	0.1476	0.3372	0.1894	0.2992	0.1931	0.318	0.263	0.2555	0.3714	0.1353	0.2616	0.2141	0.1965	0.2931	0.115	0.1686	0.1721	0.1785	0.0725	0.2146	0.1035	0.2869	0.3063	0.216	0.1673	0.0742	0.3706	0.1584	0.1805	0.1678	0.2063	0.1888	0.2309	0.3311	0.2529	0.2683	0.2655
ECE1	964	AP	4.1			0	1	0.5535	0.0815	0.0909	0.1289	0.1005	0.1501	0.0408	0.0637	0.0546	0.0316	0.0594	0.0366	0.0139	0.0607	0.0295	0.1244	0.0489	0.0803	0.1192	0.0289	0.1003	0.0495	0.0794	0.0296	0.1248	0.0299	0.0834	0.0913	0.0483	0.0885	0.0749	0.0773	0.0296	0.0596	0.062	0.0535	0.163	0.0199	0.0984	0.0451	0.0777	0.1512
ECE1	965	ES	19	18	20	0	1	0.0245	0.0032	1	0.9943	1	0.9942	0.998	1	0.9938	0.9981	0.9926	1	1	1	1	0.9931	0.9955	1	1	0.9974	1	1	0.9978	1	0.9984	0.9982	1	1	1	0.9985	0.9979	0.9914	0.9987	0.9986	0.9974	0.998	0.994	1	0.9889	1	1	1
NBPF3	966	AD	12.3	12.2	13	0	0.9818	0.6881	0.1012	0.8638	0.8692	0.9238	0.8638	0.9179	0.9125	0.9412	0.8871	0.9088	0.8217	1	0.8329	0.8329	0.7074	0.9322	0.9049	0.9158	0.9245	1	0.7907	0.96	0.9676	0.8742	0.943	0.9057	0.7897	0.7838	0.7907	0.835	0.824	0.8638	0.776	0.9125	0.8771	0.9125	0.8518	0.677	0.7838	0.9583	0.8192
NBPF3	967	AA	12.1	11	12.2	0	0.9855	0.595	0.0828	0.1039	0	0.0077	0.0333	0.06	0.0354	0.0193	0.0218	0.0155	0.0644		0.0207	0.0354	0.2354	0.0074	0.1091	0.0477	0.2045	0.0407	0.1091	0.2561	0.063	0.0841	0.0282	0.0719	0.0323	0.0522	0.1306	0.095	0.136	0.2561	0.0721	0	0	0.0407	0.0852	0.0781	0.1551	0.0566	0.0644
NBPF3	968	ES	3:4:5:6	2	7	0	1	0.2772	0.0279	1	1	1	1	1	1	0.9444	1	1	1	1	0.9406	1	0.9384	0.9811	1	1	1	1	1	1	1	1	1	1	1	0.9396	1	1	1	1	0.9659	1	0.9633	1	1	1	1	1	1
NBPF3	970	ES	03:04:05	2	6	0	0.9982	0.4671	0.0495	1	1	0.9652	1	0.9793	1	1	0.9535	1	1	1	1	0.8958	0.8898	1	1	1	0.9412	0.9323	1	1	0.9524	1	1	1	1	0.9379	1	1	1	1	0.9418	1	1	1	1	1	0.8821	1	1
ALPL	972	AP	2			0	0.8745	0.4072	0.0225	0	0	0	0	0	0		0	0			0	0		0	0		0	0	0	0	0	0	0		0	0	0	0	0	0.078	0	0	0	0	0	0	0.0162	0	0.0026
ALPL	973	AP	9.1			0	0.8745	0	0	0	0	0	0	0	0		0	0			0	0		0	0		0	0	0	0	0	0	0		0	0	0	0	0	0	0	0	0	0	0	0	0	0	0
ALPL	974	AP	11			0	0.8745	0.5597	0.0824	0	0.0746	0	0.0408	0.0309	0.0362		0.0398	0			0.0223	0		0.1375	0		0.0525	0.0378	0.0738	0.0784	0.0231	0.1293	0.0322		0	0	0.0579	0.0555	0.0249	0	0	0.0188	0.0107	0.015	0.0546	0.012	0.0915	0.0412	0.1091
ALPL	975	AP	1			0	0.8745	0.599	0.0861	1	0.9254	1	0.9592	0.9691	0.9638		0.9602	1			0.9777	1		0.8625	1		0.9475	0.9622	0.9262	0.9216	0.9769	0.8707	0.9678		1	1	0.9421	0.9445	0.9751	0.922	1	0.9812	0.9893	0.985	0.9454	0.988	0.8923	0.9588	0.8883
ALPL	976	ES	10	9.2	12	0	0.9964	0.0937	0.0081	1	0.9963	1	1	1	1	1	1	1	1	1	0.9897	0.998	1	1	1	1	1	1	1	1	1	1	0.9973	1	1	1	1	1	1	1	0.9872	1	1	1	1	1	1	1	1
ALPL	977	ES	5	4	6	0	0.9727	0.12	0.013	1	0.9791	1	1	0.988	1	1	1	1	1	1	1	0.9932	0.9409	0.9452	1	1	0.9854	1	1	1	1	1	1	1	1	0.9591	1	0.9929	0.9869	1	1	1	0.9906	1	1	1	0.9839	1	0.9971
ALPL	978	ES	3	1	4	0	0.9527	0.3745	0.04	1	1	0.9783	1	0.8955	0.8663	0.9148	0.9371	1	1	1	1	0.9675	1	0.9481	1	0.7816	0.9822	0.9535	1	1	0.9733	0.9677	0.9854	1	1	0.9616	0.9895	0.9682	0.9785	0.9332	1	0.9926	0.935	1	1	0.9907	0.9825	0.9863	0.9807
RAP1GAP	983	AA	26.1:26.2	25.2	26.3	0	0.7945	0.8886	0.1442		0.6956		0.4706	0.4738	0.3178	0.8621	0.5586		0.6931					0.8583		0.6285	0.6443	0.7306	0.6022	0.87	0.7662	0.752	0.6285	0.4802		0.8157	0.5308	0.5955	0.5814		0.7391	0.8711	0.6573	0.7315		0.7639	0.524	0.6879	0.5253
RAP1GAP	984	AA	26.2	25.2	26.3	0	0.9527	0.4293	0.0613	0.8687	0.9209		0.8837	0.8462	0.8323	0.9733	0.8853	0.9417	0.8886		0.9301	1	0.9225	0.9613	1	0.8916	0.881	0.8458	0.8996	0.9707	0.8996	0.9087	0.8817	0.8685	1	0.9536	0.9175	0.8941	0.9206	0.9494	0.9021	0.9734	0.9256	0.9182	0.8565	0.9072	0.7708	0.8345	0.9342
RAP1GAP	985	AA	26.1	25.2	26.2	0	0.9455	0.571	0.0813	0.0587	0.1663		0.1069	0.141	0.0866	0.146	0.1425	0.1497	0.219	0.4279	0.1151		0.2376	0.1977		0.1745	0.1996	0.3396	0.1472	0.1761	0.2722	0.2395	0.1871	0.1247	0.1996	0.1803	0.0935	0.1512	0.1085	0.1301	0.233	0.1575	0.1354	0.1996		0.2495	0.2466	0.3014	0.073
RAP1GAP	986	AA	25.1	24	25.2	0	0.9855	0	0	1	1		1	1	1	1	1	1	1	1	1	1	1	1	1	1	1	1	1	1	1	1	1	1	1	1	1	1	1	1	1	1	1	1	1	1	1	1	1
RAP1GAP	990	AA	22.1:22.2:22.3	21	22.4	0	0.9491	0.5222	0.0592	0.0273	0.1504		0	0.0243	0.0052	0.0168	0.0168	0	0.0044	0.0125	0.0318		0.0464	0.025	0	0.0311	0.0182	0.0778	0.0276	0.0149	0.0137	0.057	0.0073	0.0589		0	0.0437	0.0156	0.0467	0.1232	0.0878	0.0031	0.0044	0.0117		0.0595	0.0349	0.0778	0.0983
RAP1GAP	991	ES	22.1:22.2	21	22.4	0	0.9073	0.1563	0.0223		0		0	0.0101	0.0041	0	0.0276	0	0.0138	0.0131	0		0	0.0214	0	0	0.0096	0.0145	0.0328	0	0.0237	0	0	0		0	0.0275	0	0		0	0.0378	0	0.0041		0.0131	0.0186	0	0
RAP1GAP	992	ES	22.1	21	22.4	0	0.9145	0.4063	0.0572		0.1779		0.0751	0.0526	0.0244	0.0084	0.0251	0.0277	0	0	0		0.0204	0.0643	0.1397	0.0835	0.0621	0.0292	0	0.0159	0.065	0.0306	0.0576	0.0803		0	0.0162	0	0.0246		0.1006	0.1074	0.0665	0.078		0	0.019	0.038	0.0518
USP48	994	AP	12.1			0	1	0.8816	0.183	0.5465	0.6785	0.496	0.4056	0.5585	0.2131	0.2619	0.3811	0.3432	0.6246	0.1623	0.2734	0.1321	0.6515	0.4525	0.1292	0.251	0.3494	0.7152	0.6759	0.4453	0.3569	0.5244	0.3212	0.3665	0.2497	0.1763	0.6135	0.6368	0.4045	0.3549	0.3216	0.5714	0.2042	0.2445	0.836	0.3026	0.4145	0.4896	0.5592
USP48	995	AP	1			0	1	0.8816	0.183	0.4535	0.3215	0.504	0.5944	0.4415	0.7869	0.7381	0.6189	0.6568	0.3754	0.8377	0.7266	0.8679	0.3485	0.5475	0.8708	0.749	0.6506	0.2848	0.3241	0.5547	0.6431	0.4756	0.6788	0.6335	0.7503	0.8237	0.3865	0.3632	0.5955	0.6451	0.6784	0.4286	0.7958	0.7555	0.164	0.6974	0.5855	0.5104	0.4408
USP48	996	AT	27			0	1	0.6204	0.1165	0.4158	0.4651	0.3897	0.7117	0.3549	0.2194	0.2478	0.5066	0.3501	0.5203	0.4084	0.5874	0.2175	0.3739	0.3457	0.2317	0.5265	0.5965	0.5578	0.4473	0.5354	0.3818	0.4801	0.6268	0.6005	0.6351	0.4977	0.663	0.6372	0.702	0.754	0.4578	0.5527	0.4644	0.6232	0.6888	0.6086	0.4635	0.7231	0.6897
USP48	997	AT	11.2			0	1	0.6204	0.1165	0.5842	0.5349	0.6103	0.2883	0.6451	0.7806	0.7522	0.4934	0.6499	0.4797	0.5916	0.4126	0.7825	0.6261	0.6543	0.7683	0.4735	0.4035	0.4422	0.5527	0.4646	0.6182	0.5199	0.3732	0.3995	0.3649	0.5023	0.337	0.3628	0.298	0.246	0.5422	0.4473	0.5356	0.3768	0.3112	0.3914	0.5365	0.2769	0.3103
USP48	998	ES	23	22	24	0	1	0.1099	0.015	0.9815	0.9739	0.9472	0.9742	0.9915	1	0.9573	0.9709	0.9632	0.987	0.9252	0.9914	1	0.9854	0.9908	1	0.9784	1	0.978	0.9695	0.9714	0.9745	0.9761	0.9887	0.9813	0.9936	0.9802	0.969	0.9754	0.9667	0.9801	0.972	0.9912	0.9942	0.9516	0.9833	0.9747	1	0.988	0.9732
USP48	999	AA	16.1	15	16.2	0	0.9982	0.0542	0.0092	0	0.0181	0.0356	0	0.0245	0	0	0	0	0	0	0	0	0	0.0128	0	0	0	0	0	0	0	0	0	0.0109	0	0.0131	0.007	0.0076	0.0109	0.0154	0.0111	0	0.0092	0	0	0	0	0	0
USP48	1000	AA	14.1	13	14.2	0	1	0.4625	0.0724	0.8857	0.6836	0.8027	0.7393	0.8076	0.7209	0.6772	0.725	0.8629	0.7589	0.6035	0.6932	0.7948	0.5755	0.7694	1	0.7258	0.7575	0.6932	0.8323	0.7707	0.6738	0.8307	0.678	0.8157	0.6545	0.6378	0.723	0.7388	0.7209	0.7722	0.5722	0.7863	0.729	0.7396	0.6661	0.7948	0.8611	0.7437	0.6326
USP48	1001	AA	10.1	9	10.2	0	1	0.3115	0.0468	0.879	0.9025	0.8105	0.8152	0.902	0.8932	0.879	0.8103	0.8338	0.9109	0.8288	0.7754	0.8944	0.8857	0.889	0.8714	0.8654	0.8254	0.8332	0.7545	0.8714	0.83	0.9258	0.8553	0.8406	0.7643	0.8568	0.802	0.7961	0.8806	0.7487	0.8836	0.7821	0.8326	0.8356	0.8367	0.8654	0.8654	0.8186	0.9195
LDLRAD2	1002	RI	5.2	5.1	5.3	0	0.9964	0.3041	0.016	1	1	1	1	1	1	1	1	1	1	1	1	1	1	1	1	1	1	1	1	1	1	1	1	1	1	1	1	1	1	1	1	1	1	1	1	1	1	1	1
CDC42	1003	AT	8			0	1	0.0412	0.0049	0.0036	0.0096	0.0027	0.0028	0.0068	0.0023	0.0034	0.0052	0.0026	0.0136	0.0062	0.0037	0.0033	0.0271	0.0052	0.0024	0.0018	0.0064	0.0095	0.0074	0.0057	0.007	0.0116	0.0045	0.0063	0.0043	0.0036	0.0111	0.0105	0.0058	0.0055	0.0056	0.0027	0.0017	0.0024	0.0114	0.0044	0.0066	0.0074	0.0069
CDC42	1004	AT	9			0	1	0.0412	0.0049	0.9964	0.9904	0.9973	0.9972	0.9932	0.9977	0.9966	0.9948	0.9974	0.9864	0.9938	0.9963	0.9967	0.9729	0.9948	0.9976	0.9982	0.9936	0.9905	0.9926	0.9943	0.993	0.9884	0.9955	0.9937	0.9957	0.9964	0.9889	0.9895	0.9942	0.9945	0.9944	0.9973	0.9983	0.9976	0.9886	0.9956	0.9934	0.9926	0.9931
CDC42	1005	ES	4	3	5	0	1	0.0339	0.0052	0.0141	0.0079	0.009	0.0048	0.0047	0.0079	0.0058	0.0057	0.0084	0.012	0.0065	0.0018	0.0049	0.0082	0.0028	0.005	0.0058	0.0149	0.0049	0.0246	0.0167	0.0112	0.0056	0.0111	0.0035	0.0051	0.0104	0.0055	0.0173	0.006	0.0058	0.0072	0.0077	0.0022	0.0017	0.0158	0.0069	0.0028	0.0073	0.0063
CDC42	1006	ES	2	1	3	0	1	0.1552	0.023	0.0393	0.0537	0.0222	0.0629	0.056	0.0429	0.0571	0.0424	0.0543	0.0605	0.0676	0.0601	0.0359	0.0723	0.0439	0.049	0.0879	0.0968	0.0542	0.0811	0.0461	0.0551	0.0699	0.0853	0.0672	0.0774	0.0351	0.0576	0.0762	0.0735	0.1114	0.0926	0.0761	0.0621	0.064	0.0685	0.0605	0.0634	0.1	0.0776
ZBTB40	1009	ES	05:06:00	4	7	0	0.9927	0.3046	0.0382	1	1	1	1	0.9498	1	1	1	1	1	1	1	1	1	0.9312	1	1	0.9332	1	0.9332	0.9533	1	1	1	1	1	1	0.9807	1	0.9368	1	0.9113	1	1	1	1	1	1	1	1
C1QA	1011	AP	1			0	0.9945	0.2207	0.0228	0.9663	1	1	0.9644	1	0.9831	0.9843	1	0.9866	0.9586	1	0.9911	0.99	0.9764	0.9618	0.9878	0.9842	1	0.9904	0.9469	0.9177	0.914	0.9815	0.99	1	0.9569	0.9831	0.9554	0.9821	0.974	0.9315	1	0.9777	0.9626	0.9666	0.7793	0.987	1	0.9779	0.9779
C1QA	1012	AP	2.1			0	0.9945	0.2207	0.0228	0.0337	0	0	0.0356	0	0.0169	0.0157	0	0.0134	0.0414	0	0.0089	0.01	0.0236	0.0382	0.0122	0.0158	0	0.0096	0.0531	0.0823	0.086	0.0185	0.01	0	0.0431	0.0169	0.0446	0.0179	0.026	0.0685	0	0.0223	0.0374	0.0334	0.2207	0.013	0	0.0221	0.0221
C1QC	1014	AD	1.3	1.2	2	0	0.9364	0.7697	0.096	0.0598	0.081		0.2991	0.1791	0.178	0.1614	0.1497	0.3149	0.2312	0.3641	0.3338	0.3285	0.0614	0.2939	0.2204	0.3936	0.1129	0.3689	0.4134	0.3163		0.2461	0.1514	0.2079	0.1617	0.2408	0.1652	0.2062	0.0989	0.5499	0.3786	0.3994	0.1926	0.1833		0.2029		0.2076	0.2007
C1QC	1019	AD	1.2:1.3	1.1	2	0	0.9964	0.1399	0.0151	0.007	0.0073		0.0233	0.0196	0.0207	0.0147	0.014	0.0295	0.0284	0.0373	0.0284	0.0401	0.0074	0.0327	0.0277	0.025	0.0067	0.0378	0.0335	0.0217	0.0064	0.0182	0.0135	0.0173	0.0129	0.0202	0.0161	0.0184	0.0088	0.0652	0.063	0.0374	0.0209	0.0173	0	0.018	0	0.0262	0.0216
C1QC	1020	AD	1.2	1.1	2	0	0.9964	0.3696	0.0283	0.1133	0.0845		0.0631	0.0962	0.0967	0.084	0.0824	0.0654	0.1014	0.0748	0.0726	0.0994	0.1131	0.0912	0.0985	0.0471	0.0768	0.0736	0.0676	0.0623	0.106	0.0684	0.0858	0.0675	0.075	0.0737	0.0789	0.067	0.0865	0.0659	0.0983	0.0745	0.0928	0.0844	0.077	0.0751	0.0556	0.0963	0.0804
EPHB2	1023	AT	8			0	1	0.0806	0.0052	0	0	0	0	0.0027	0	0	0.0084	0	0	0	0	0	0	0	0	0	0	0	0	0	0	0.0069	0	0	0	0	0.0014	0.0124	0.0101	0.0806	0	0	0	0	0	0	0	0	0
EPHB2	1024	AT	17.5			0	1	0.0806	0.0052	1	1	1	1	0.9973	1	1	0.9916	1	1	1	1	1	1	1	1	1	1	1	1	1	1	0.9931	1	1	1	1	0.9986	0.9876	0.9899	0.9194	1	1	1	1	1	1	1	1	1
EPHB2	1025	RI	17.4	17.3	17.5	0	0.9745	0.2009	0.0211	1	1	1	1	1	1	1	1	1	1	1	1	1	1	1	1	1	1	1	1	1	1	0.9417	1	1	0.9628	1	0.9744	1	1	1	0.961	0.9885	1	1	1	1	1	0.9655	1
EPHB2	1026	RI	17.2	17.1	17.3	0	1	0.9811	0.1663	0.1541	0.509	0.1223	0.1175	0.1068	0.1045	0.1659	0.1434	0.0946	0.2842	0.046	0.0936	0.088	0.3742	0.1325	0.1139	0.1566	0.1112	0.1352	0.1643	0.1644	0.1397	0.213	0.1311	0.1783	0.0943	0.4909	0.1013	0.3104	0.2155	0.6333	0.0702	0.0409	0.0558	0.0988	0.2753	0.0604	0.4142	0.1383	0.2402
EPHB2	1027	AA	11.1	10	11.2	0	0.7891	0.4365	0.0663		0.4365		0.0693	0.119		0.0971	0.0485	0.1771	0.0809	0	0.1679	0.0719	0.0777	0.1178		0.0334	0.0511	0.139	0.0832	0.0511	0.3675	0.157	0	0.0359	0.146		0.1215	0.0647	0	0.0883	0.1259	0.094	0.1005	0.0809	0.2087	0.1153		0.0484	0.0971
KDM1A	1030	ES	11	9	12	0	1	0.0129	0.0009	0	0	0	0	0	0	0	0	0	0	0	0	0	0	0	0	0	0	0	0	0	0	0	0	0	0	0	0	0	0	0	0.002	0	0	0	0	0	0	0	0
KDM1A	1031	ES	10	9	12	0	1	0.0064	0.0006	0	0	0	0	0	0	0	0	0	0	0	0	0	0	0	0	0	0	0	0	0	0	0	0	0	0	0	0	0	0	0	0	0	0	0	0	0	0	0	0
KDM1A	1032	ES	3	2	4	0	1	0.5138	0.083	0.6542	0.5695	0.5855	0.7256	0.6709	0.5705	0.5984	0.5199	0.562	0.5999	0.7516	0.6779	0.5476	0.6197	0.5727	0.5532	0.6511	0.5702	0.6649	0.7538	0.6546	0.6425	0.6125	0.6449	0.7314	0.4759	0.6771	0.5942	0.6609	0.5984	0.5776	0.5236	0.7263	0.5071	0.5386	0.6132	0.5063	0.6221	0.704	0.6625
LUZP1	1036	AT	5			0	1	0.0444	0.0063	0	0.0051	0.0154	0	0.0119	0	0	0	0.0101	0.0056	0	0.0035	0	0.0127	0.0047	0.0081	0.005	0.0027	0	0.0034	0	0	0.0131	0	0.0061	0	0.0043	0.0136	0.008	0	0.0387	0.0026	0	0	0	0.0024	0	0	0.0032	0
LUZP1	1037	AT	6			0	1	0.0444	0.0063	1	0.9949	0.9846	1	0.9881	1	1	1	0.9899	0.9944	1	0.9965	1	0.9873	0.9953	0.9919	0.995	0.9973	1	0.9966	1	1	0.9869	1	0.9939	1	0.9957	0.9864	0.992	1	0.9613	0.9974	1	1	1	0.9976	1	1	0.9968	1
LUZP1	1039	ES	3.2	2	4	0	0.8891	0.212	0.0234		1	1	1	1	1	1	1	1	1		1		1	1	1	1	1	1		1	1	1	1	1	1	1	0.9648	1	1	1	1		1		1	1	1	1
HTR1D	1041	AT	2			0	0.9273	0.4312	0.0199	0			0	0	0	0			0				0	0	0	0	0	0	0	0	0	0	0	0	0	0	0	0	0	0	0		0	0	0		0	0	0
HTR1D	1042	AT	1.2			0	0.9273	0.4312	0.0199	1			1	1	1	1			1				1	1	1	1	1	1	1	1	1	1	1	1	1	1	1	1	1	1	1		1	1	1		1	1	1
HNRNPR	1043	AA	8.1	7	8.2	0	1	0.2967	0.0424	0.2271	0.1344	0.1529	0.1541	0.1257	0.1276	0.1701	0.1454	0.2082	0.1183	0.2146	0.0831	0.0454	0.1497	0.165	0.1083	0.1337	0.1368	0.0984	0.1369	0.1554	0.1116	0.1872	0.136	0.1985	0.0655	0.0975	0.1258	0.104	0.1958	0.1427	0.1479	0.1586	0.1773	0.1961	0.0898	0.1541	0.1043	0.1715	0.1717
HNRNPR	1044	ES	6	5	7	0	1	0.09	0.0101	1	0.975	0.9921	0.9938	0.9935	0.9953	0.9839	0.9954	0.9958	0.9814	0.9901	0.993	0.9537	0.9848	0.9874	1	0.9906	0.9722	0.9922	0.978	0.9904	0.99	0.9826	0.9889	0.993	1	0.9846	0.9876	0.9948	0.985	0.9747	0.9821	1	0.9714	0.9918	0.9925	0.9606	0.9897	1	0.9829
HNRNPR	1046	ES	5	4	6	0	1	0.1062	0.0159	0.99	0.9447	0.9634	0.9454	0.9717	0.9599	0.9345	0.942	0.9596	0.9555	0.9232	0.9339	0.9559	0.943	0.9758	0.975	0.9805	0.9573	0.9655	0.9681	0.9686	0.9651	0.9384	0.959	0.9698	0.9432	0.9779	0.9242	0.9355	0.9636	0.9776	0.9598	0.9922	0.9455	0.943	0.9564	0.9685	0.9262	0.9738	0.9431
HNRNPR	1047	AA	2.1	1	2.2	0	0.9964	0.808	0.0912	0.5755	0.4626	0.4014	0.5305	0.4829	0.4804	0.5965	0.4004	0.4682	0.5349		0.5494	0.3145	0.366	0.5337	0.3852	0.3349	0.446	0.3863	0.3262	0.5105	0.4307	0.4089	0.4321	0.492	0.4768	0.4509	0.4437	0.4703	0.406	0.212	0.6087	0.7635	0.3507	0.4682	0.4916	0.3543	0.3427	0.45	0.7306
HNRNPR	1048	ES	2.1:2.2	1	3	0	1	0.5308	0.0745	0.3754	0.2176	0.4401	0.3035	0.2859	0.3314	0.2648	0.183	0.2353	0.4078	0.1558	0.3793	0.1221	0.2633	0.2679	0.21	0.2245	0.3023	0.3019	0.216	0.3942	0.2717	0.2043	0.2768	0.2984	0.286	0.3018	0.2103	0.239	0.2391	0.2194	0.3647	0.428	0.2529	0.2803	0.2417	0.2157	0.1421	0.3329	0.3224
HNRNPR	1049	ES	2.2	1	3	0	1	0.5417	0.0752	0.3086	0.2456	0.542	0.2793	0.3017	0.3501	0.1969	0.2522	0.2605	0.3759	0.224	0.3354	0.2337	0.3836	0.2435	0.2988	0.3665	0.3514	0.4092	0.3645	0.386	0.3315	0.2725	0.336	0.3063	0.3064	0.3461	0.2512	0.2625	0.3162	0.5129	0.2709	0.1893	0.3866	0.3076	0.2492	0.3353	0.2423	0.3804	0.15
ZNF436	1050	AP	1			0	0.9873	0.881	0.174	0.4786	0.2672	0.7231	0.6468	0.2543	0.5093	0.2758	0.4035	0.3219	0.3249	0.749	0.3231	0.2989	0.305	0.2744	0.6781	0.1044	0.1736	0.6781	0.4674	0.5281	0.3876	0.5639	0.1337	0.4904	0.2298	0.2884	0.6911	0.4884	0.5504	0.4629	0.2692	0.4125	0.5551	0.749	0.1182	0.4602	0.249	0.4435	0.239
ZNF436	1051	AP	2.1			0	0.9873	0.881	0.174	0.5214	0.7328	0.2769	0.3532	0.7457	0.4907	0.7242	0.5965	0.6781	0.6751	0.251	0.6769	0.7011	0.695	0.7256	0.3219	0.8956	0.8264	0.3219	0.5326	0.4719	0.6124	0.4361	0.8663	0.5096	0.7702	0.7116	0.3089	0.5116	0.4496	0.5371	0.7308	0.5875	0.4449	0.251	0.8818	0.5398	0.751	0.5565	0.761
C1orf213	1054	RI	1.5	1.4	1.6	0	0.94	0.8307	0.1803	1	1	0.7984	1	1	0.3178	1	0.7984	1	1		1	0.7443	0.867	0.6508	0.538	0.8427	0.7984	0.5829	1	0.7831	0.6083	1	1	0.7193		0.8748	0.6482	0.9062	1	1	0.8609	0.6281	0.368		1	1	1	0.7715	0.7098
C1orf213	1055	RI	1.3	1.2	1.4	0	0.9982	0.6551	0.1422	1	0.6906	1	0.8549	1	0.6022	1	0.936	0.6763	1	0.4456	0.7796	0.4286	0.9169	0.6859	1	0.7172	1	1	1	1	0.6191	1	0.7871	0.8989	1	1	0.921	0.8722	0.9364	0.5913	0.9464	0.7657	0.7172	0.4692	0.8983	0.7612	0.7179	1	1
C1orf213	1056	RI	1.2:1.3	1.1	1.4	0	0.9982	0.5824	0.1192	1	1	1	1	1	0.7514	0.8517	0.8803	1	1	0.5081	1	0.5874	1	0.8188	1	0.7875	0.8703	1	1	1	1	1	1	1	0.7495	0.916	0.8998	1	0.9385	0.8811	0.9489	0.5203	0.6786	1	0.8949	0.8607	1	1	1
TCEA3	1058	AP	1			0	0.9964	0.3475	0.0416	0.9905	0.9382	0.9531	0.9282	1	1	0.9872	0.9759	0.9761	0.9792	0.9896	0.9716	0.9881	0.8855	0.9924	1	0.9725	0.9828	0.9367	0.9506	0.9543	0.9939	0.9212	0.9905	0.9002	0.9717	0.9481	0.9287	0.9598	0.9415	0.9808	0.9025	0.9563	0.9254	0.9539	0.8655	0.9831	0.9689	0.9394	0.9596
TCEA3	1059	AP	2.1			0	0.9964	0.3475	0.0416	0.0095	0.0618	0.0469	0.0718	0	0	0.0128	0.0241	0.0239	0.0208	0.0104	0.0284	0.0119	0.1145	0.0076	0	0.0275	0.0172	0.0633	0.0494	0.0457	0.0061	0.0788	0.0095	0.0998	0.0283	0.0519	0.0713	0.0402	0.0585	0.0192	0.0975	0.0437	0.0746	0.0461	0.1345	0.0169	0.0311	0.0606	0.0404
TCEA3	1060	AT	6			0	1	0.2019	0.0205	0	0.0108	0	0.0147	0.0264	0.0045	0.0226	0.0247	0.0936	0.0103	0.0136	0.0236	0.0685	0.0264	0.0187	0	0.0074	0.0124	0.004	0.0197	0.0248	0.0133	0.064	0.0045	0.0515	0.1744	0.0028	0.0272	0.039	0.0492	0.023	0.0227	0.0176	0.0194	0.0251	0.0166	0.0039	0.0328	0.0128	0.0095
TCEA3	1061	AT	12			0	1	0.2019	0.0205	1	0.9892	1	0.9853	0.9736	0.9955	0.9774	0.9753	0.9064	0.9897	0.9864	0.9764	0.9315	0.9736	0.9813	1	0.9926	0.9876	0.996	0.9803	0.9752	0.9867	0.936	0.9955	0.9485	0.8256	0.9972	0.9728	0.961	0.9508	0.977	0.9773	0.9824	0.9806	0.9749	0.9834	0.9961	0.9672	0.9872	0.9905
TCEA3	1063	ES	2.2	1	3	1	0.7655	0.3986	0.0585			0.9229	0.5807			0.8611	0.9574		0.8438	0.8733	0.9559			0.8908			0.8979		0.9251	0.9042	0.9387	0.926	0.972			0.9118	0.97	0.9566	0.843	0.8742		0.9762			0.8217	0.8103	0.9297	0.9405
ASAP3	1066	AD	21.2	21.1	22	0	0.8964	0.5762	0.0919	0	0.2626		0.1334	0.2125	0.2626	0	0.185			0.1652	0.1652		0.2835	0.2028		0.0619	0.1061	0.0358	0.3725	0.2289		0.1061	0.1821	0		0.1821	0.1205	0.2289	0.2289	0.0974	0.1147	0.1749	0.0598	0.2028	0.5762	0.1016	0.2028	0.1673	0.0719
PITHD1	1068	AP	1			0	1	0.1985	0.0289	0.9778	0.9472	0.8911	1	0.9523	0.9889	1	1	1	0.9646	1	0.9726	1	0.8976	0.9726	0.974	0.9889	0.9964	0.986	0.9432	0.9875	0.9921	0.9437	0.9633	0.9761	0.9857	0.9926	0.9603	0.9637	0.9656	0.9669	0.9597	1	0.9938	0.9727	1	0.9863	0.9708	0.9309	0.9471
PITHD1	1069	AP	4			0	1	0.1985	0.0289	0.0222	0.0528	0.1089	0	0.0477	0.0111	0	0	0	0.0354	0	0.0274	0	0.1024	0.0274	0.026	0.0111	0.0036	0.014	0.0568	0.0125	0.0079	0.0563	0.0367	0.0239	0.0143	0.0074	0.0397	0.0363	0.0344	0.0331	0.0403	0	0.0062	0.0273	0	0.0137	0.0292	0.0691	0.0529
LYPLA2	1070	AP	1			0	0.9982	0.4469	0.057	1	0.9367		0.9386	0.9629	1	1	0.9631	0.9438	0.95	0.968	0.9726	0.9794	0.8683	0.983	1	1	0.9438	0.9413	0.9341	1	0.9557	0.9644	0.9855	0.9693	0.9757	0.9601	0.8876	0.8203	0.9747	0.9876	0.9805	0.9015	0.9851	1	0.9471	0.9604	0.9676	0.9526	0.8769
LYPLA2	1071	AP	5.1			0	0.9982	0.4469	0.057	0	0.0633		0.0614	0.0371	0	0	0.0369	0.0562	0.05	0.032	0.0274	0.0206	0.1317	0.017	0	0	0.0562	0.0587	0.0659	0	0.0443	0.0356	0.0145	0.0307	0.0243	0.0399	0.1124	0.1797	0.0253	0.0124	0.0195	0.0985	0.0149	0	0.0529	0.0396	0.0324	0.0474	0.1231
LYPLA2	1072	RI	8.5	8.4	8.6	0	1	0.3203	0.0391	0.0695	0.0714	0.0864	0.0262	0.0494	0.0258	0.0715	0.0653	0.0303	0.1031	0.0501	0.0519	0.0771	0.1553	0.0655	0.0231	0.0293	0.0465	0.0626	0.0889	0.1391	0.0554	0.0623	0.0505	0.0489	0.0306	0.0546	0.1267	0.1576	0.0523	0.029	0.0518	0.0197	0.03	0.0274	0.1419	0.0401	0.145	0.0405	0.0696
LYPLA2	1073	RI	8.2:8.3	8.1	8.4	0	0.9945	0.848	0.1416		0.7931	0.7337	0.6676	0.5086	0.4691	0.6935	0.7431	0.6542	0.7737	0.3562	0.788	0.4604	0.9668	0.7966	0.152	0.3027	0.4546	0.7709	0.87	0.599	0.7678	0.6316	0.4925	0.7634	0.5876	0.6109	0.82	0.7991	0.801	0.665	0.7211	0.6152	0.3289	0.5513	0.9415	0.7634	0.9025	0.7366	0.6835
LYPLA2	1074	AA	8.3	8.1	8.4	0	1	0.1645	0.0121	0.9894	0.989	0.8355	0.9843	0.9746	0.9778	0.9762	0.9821	0.9879	0.9701	0.9779	0.9894	0.9761	0.995	0.984	0.9385	0.9737	0.9711	0.9846	0.9881	0.9664	0.9796	0.9629	0.9643	0.9811	0.9775	0.9669	0.9761	0.9671	0.9743	0.9919	0.986	0.9837	0.9705	0.9707	0.9887	0.9866	0.9841	0.983	0.9589
LYPLA2	1075	RI	8.2	8.1	8.3	0	0.9982	0.2134	0.0385	0.0225	0.0475		0.0366	0.0306	0.0237	0.0608	0.0583	0.027	0.1102	0.0151	0.0439	0.0239	0.1508	0.0718	0.0147	0.0131	0.028	0.0594	0.0889	0.0562	0.0742	0.0695	0.0406	0.066	0.0386	0.0603	0.1153	0.1331	0.111	0.0189	0.0406	0.0295	0.0169	0.0415	0.1755	0.0481	0.1453	0.0525	0.0969
LYPLA2	1076	ES	7	6	8.1	0	1	0.0332	0.0018	1	1	0.9823	1	1	1	1	1	1	1	1	1	1	1	1	1	1	1	1	1	1	1	1	1	1	1	1	1	1	1	1	1	0.9976	1	1	1	1	0.9957	0.9971	1
GALE	1077	ES	3	2	4	1	0.9109	0.3235	0.0556	0.9564	0.8868		0.8825	0.9028	0.8964	0.92	0.8602	0.9052	0.8933	0.911	0.8968	0.8436		0.8753		0.8874	0.864	0.8519	0.8084	0.7975	0.9336	0.9022	0.8788	0.9175	0.8351	0.8741	0.8672	0.7619	0.922	0.8947	0.9074	0.9025	0.7786	0.8978	0.8675	0.9158	0.8036	0.937	0.7956
HMGCL	1078	AP	1			0	1	0.3261	0.0291	0	0.0142	0	0.0554	0.0126	0.0164	0.0079	0.0224	0.0038	0	0	0.0104	0	0.0288	0	0.012	0	0.0074	0.0114	0	0.0081	0.0069	0.0016	0.0039	0.002	0.0049	0.0133	0.0032	0.031	0.0325	0.1225	0.0253	0.0064	0.0028	0	0	0.0044	0.005	0	0.0138
HMGCL	1079	AP	3			0	1	0.3261	0.0291	1	0.9858	1	0.9446	0.9874	0.9836	0.9921	0.9776	0.9962	1	1	0.9896	1	0.9712	1	0.988	1	0.9926	0.9886	1	0.9919	0.9931	0.9984	0.9961	0.998	0.9951	0.9867	0.9968	0.969	0.9675	0.8775	0.9747	0.9936	0.9972	1	1	0.9956	0.995	1	0.9862
HMGCL	1080	ES	07:08:00	6	9	0	1	0.156	0.0206	0.9571	0.9742	0.9832	0.9714	0.9676	0.9787	0.9943	0.9748	0.9831	0.9052	0.9912	0.9889	0.9346	0.9781	0.9555	1	0.9922	0.9419	1	0.9663	0.9932	0.982	0.9768	0.9715	0.9971	0.9763	0.9638	0.9958	0.9564	0.965	1	0.9716	0.9961	0.9392	0.9694	0.9198	0.983	0.973	0.9939	0.9484
MYOM3	1085	AT	31.2			0	0.9891	0.3546	0.0431	0	0		0	0	0	0	0	0	0		0	0	0	0		0	0	0	0	0	0	0.1412	0	0	0	0	0	0	0	0.1887	0	0.147	0	0	0	0	0	0	0
MYOM3	1086	AT	39			0	0.9891	0.3546	0.0431	1	1		1	1	1	1	1	1	1		1	1	1	1		1	1	1	1	1	1	0.8588	1	1	1	1	1	1	1	0.8113	1	0.853	1	1	1	1	1	1	1
IFNLR1	1092	AT	7.2			0	1	0.592	0.0971	0	0.0241	0.054	0.4717	0	0.1965	0.1171	0.1432	0	0.0251	0	0	0	0.0948	0.041	0.0782	0	0.3033	0.0166	0.0376	0.0356	0	0.0188	0	0	0.1459	0.0136	0.0109	0.3673	0	0	0.053	0.0597	0.2807	0	0.0473	0	0.0388	0	0
IFNLR1	1093	AT	5.2			0	1	0.3269	0.0499	0.1192	0.1238	0.0504	0.0712	0.0428	0.0733	0.0765	0.0668	0	0.082	0	0.067	0.075	0.1075	0.0766	0.073	0	0.0218	0.1086	0.1402	0.0415	0.0187	0.1577	0.0202	0.0497	0	0.0569	0.0865	0.1802	0.0304	0.0585	0.0734	0.0279	0.0164	0	0.0655	0.0468	0.0905	0.0438	0.167
IFNLR1	1094	AT	8.2			0	1	0.6942	0.1168	0.8808	0.8521	0.8956	0.4571	0.9572	0.7302	0.8064	0.79	1	0.8928	1	0.933	0.925	0.7977	0.8824	0.8488	1	0.6749	0.8748	0.8222	0.9229	0.9813	0.8235	0.9798	0.9503	0.8541	0.9295	0.9026	0.4525	0.9696	0.9415	0.8737	0.9124	0.7029	1	0.8872	0.9532	0.8707	0.9562	0.833
IFNLR1	1095	AA	8.1	7.1	8.2	0	0.9109	0.181	0.0084	1	1	1	1		1	1	1	1	1		1		1	1	1	1	1	1	1	1	1	1	1	1		1	1	1	1	1	1		1		1		1	1	1
IFNLR1	1096	ES	7.1	6	8.1	0	0.9309	0.4762	0.0747	1	1	1	0.9287		1	0.9429	1	0.9008	0.9439		0.9147		1	1	1	1	0.9142	0.9141	1	0.876	1	0.9478	1	1	0.7481	0.9744	0.9752	0.9011	1	0.7428	0.9731		1	1	1		0.96	1	1
GRHL3	1097	AP	2			0	0.8455	0.8267	0.1292	0	0.0494	0	0	0.0504	0.0447	0.0341	0.0504	0.0627	0.0443	0	0.096	0.0616	0.0656	0.0253	0.1538	0.1045	0.0243	0.081	0.1873	0.1415	0.0917	0.0391	0.037	0.0934	0	0.0719	0.0079	0.0336	0.3443	0.0668	0.3464	0.0484	0.1975	0.3714	0.0921	0.7799	0.0153	0.033	0.3919
GRHL3	1098	AP	1.1			0	0.8455	0.8267	0.1292	1	0.9506	1	1	0.9496	0.9553	0.9659	0.9496	0.9373	0.9557	1	0.904	0.9384	0.9344	0.9747	0.8462	0.8955	0.9757	0.919	0.8127	0.8585	0.9083	0.9609	0.963	0.9066	1	0.9281	0.9921	0.9664	0.6557	0.9332	0.6536	0.9516	0.8025	0.6286	0.9079	0.2201	0.9847	0.967	0.6081
GRHL3	1099	AT	17			0	0.9673	0.5902	0.0614	1	0.9898	1	0.981	0.9875	1	0.9883	0.9849	0.9948	0.9967	1	0.9856	1	0.9714	0.992	1	0.9953	0.9962	0.9793	0.9767	0.9678	0.9976	0.9874	0.9836	0.9964	1	0.9947	0.9959	0.9935	1	0.9882	0.9834	0.9991	0.981	1	0.9959	1	0.998	1	1
GRHL3	1100	AT	18			0	0.9673	0.5902	0.0614	0	0.0102	0	0.019	0.0125	0	0.0117	0.0151	0.0052	0.0033	0	0.0144	0	0.0286	0.008	0	0.0047	0.0038	0.0207	0.0233	0.0322	0.0024	0.0126	0.0164	0.0036	0	0.0053	0.0041	0.0065	0	0.0118	0.0166	0.0009	0.019	0	0.0041	0	0.002	0	0
STPG1	1103	AP	2			0	0.9418	0.4189	0.0616	1	1	0.8919	1	0.8538	0.946	0.946	0.9289	1	0.9537	1	0.9074	0.9116	0.9428	0.9142		0.9706	0.9428	0.9774	1	0.9738	0.8813	0.8919	1	0.919	1	0.8873	0.9738	0.8428	0.8702	0.9751	0.9776	0.9578	0.9687	1	1	1	0.9665	0.976	1
STPG1	1104	AP	3.1			0	0.9418	0	0	0	0	0	0	0	0	0	0	0	0	0	0	0	0	0		0	0	0	0	0	0	0	0	0	0	0	0	0	0	0	0	0	0	0	0	0	0	0	0
STPG1	1105	AP	1			0	0.9418	0.4189	0.0616	0	0	0.1081	0	0.1462	0.054	0.054	0.0711	0	0.0463	0	0.0926	0.0884	0.0572	0.0858		0.0294	0.0572	0.0226	0	0.0262	0.1187	0.1081	0	0.081	0	0.1127	0.0262	0.1572	0.1298	0.0249	0.0224	0.0422	0.0313	0	0	0	0.0335	0.024	0
STPG1	1106	ES	4	3.2	5	0	0.9909	0.8426	0.1844	1	1	1	0.9203	0.6767	0.9585	1	1	0.8532	1	1	1	1	1	0.894	1	1	0.961	1	0.64	0.8253	1	0.9482	0.9128	0.7807	0.5526	0.9152	1	0.9778	1	0.9331	0.1753	1	0.2749	1	1	0.9368	0.894	1	0.696
NIPAL3	1109	AT	14			0	1	0.7322	0.1491	0.3914	0.4125	0.4036	0.11	0.2834	0.469	0.4565	0.4198	0.5154	0.2698	0.4655	0.4521	0.5228	0.4214	0.4209	0.3682	0.2626	0.1784	0.3874	0.2146	0.3852	0.5104	0.4225	0.3974	0.2472	0.3556	0.1974	0.3246	0.427	0.4853	0.2979	0.2185	0.3843	0.244	0.4595	0.4313	0.235	0.3887	0.2941	0.2226
NIPAL3	1110	AT	9			0	1	0.0852	0.0128	0.0065	0.0097	0.0023	0.0034	0.0092	0.0108	0.0177	0.0213	0.0164	0.0168	0.0369	0.0316	0.0292	0.0335	0.0122	0	0.016	0.0097	0.0218	0.0208	0.0236	0.014	0.0204	0.0266	0.0042	0.015	0.0129	0.0391	0.0694	0.0253	0.026	0.016	0.007	0.0113	0.0069	0.0111	0.0102	0.0231	0.0125	0.0095
NIPAL3	1111	AT	15			0	1	0.7497	0.1534	0.6021	0.5778	0.5941	0.8866	0.7073	0.5202	0.5259	0.5589	0.4682	0.7133	0.4976	0.5163	0.448	0.545	0.5669	0.6318	0.7214	0.8119	0.5908	0.7647	0.5912	0.4756	0.5571	0.576	0.7485	0.6294	0.7897	0.6364	0.5037	0.4894	0.676	0.7655	0.6086	0.7447	0.5336	0.5575	0.7548	0.5882	0.6934	0.7679
NIPAL3	1112	ES	3	2	4	0	0.9236	0.2105	0.0295		0	0	0	0.0285	0.0436	0.0301	0.0409	0.0639	0.0261		0	0.0482	0.0212	0		0	0.015	0.0671	0.0706	0	0.0277	0.0889	0	0.0611		0.0305	0	0.0561	0.0706	0.0212	0.0171	0	0	0.0457		0	0.0744	0.0412	0
RCAN3	1115	AA	4.1	3	4.2	0	0.9909	0	0	1	1	1	1	1	1	1	1	1	1	1	1	1	1	1	1	1	1	1	1	1	1	1	1	1	1	1	1	1	1	1	1	1	1	1	1	1	1	1	1
RCAN3	1116	ES	4.1:4.2	3	5	0	1	0.2404	0.0138	1	1	1	1	0.9848	1	1	1	1	1	0.9224	1	0.9464	1	1	1	1	0.9899	1	1	1	1	1	1	1	1	1	1	1	1	1	1	1	1	1	1	1	1	1	1
RCAN3	1118	ES	3:4.1:4.2	2	5	0	1	0.0632	0.0084	1	0.9564	0.9673	1	1	1	1	1	1	1	1	1	1	1	1	1	1	0.9905	1	1	1	1	1	1	0.9693	1	1	1	1	1	1	0.9945	1	1	1	1	0.9858	1	1	1
RCAN3	1122	ES	3	2	4.1	0	1	0.213	0.0234	1	0.9245	0.9643	1	1	1	1	1	1	0.9744	0.9343	1	1	1	0.9808	0.9121	1	0.9898	0.9708	1	0.9799	1	0.9678	0.9336	0.983	0.9171	0.9832	0.98	1	1	1	1	1	0.9476	1	1	1	1	0.9773	1
SRRM1	1128	ES	16	15	17	0	1	0.9141	0.112	0.636	0.7404	0.7987	0.7262	0.6105	0.551	0.6303	0.6181	0.6437	0.6339	0.417	0.4817	0.7128	0.6971	0.6481	0.6141	0.5973	0.6191	0.5412	0.6571	0.7036	0.5709	0.5736	0.5009	0.703	0.8928	0.5458	0.6827	0.4115	0.6157	0.5563	0.4487	0.5677	0.6473	0.5563	0.6476	0.5749	0.9007	0.7322	0.7374
SRRM1	1129	AD	12.2	12.1	13	0	0.9982	0.3781	0.0565	0.708	0.738	0.9172	0.9566	0.7291	0.7923	0.8825	0.7445	0.7819	0.8304	0.738	0.7627	0.7977	0.7477	0.8188	0.8244	0.8352	0.8095	0.8211	0.8702	0.7867	0.7938	0.8059	0.7797	0.6967	0.8806	0.8009	0.7997	0.8409	0.7346	0.6926	0.8567	0.6704	0.8658	0.7515	0.8545	0.7489	0.8602	0.8634	0.7749
SRRM1	1130	ES	11	10.2	12.1	0	0.9982	0.3177	0.0382	0	0.0365	0	0.0166	0.0411	0.0142	0.026	0.0105	0.0238	0.0564	0.1171	0.0185	0.0255	0.04	0.0389	0	0.0255	0.0214	0.0592	0	0	0.0516	0.0387	0.0347	0.0125	0.023	0.0185	0.035	0.0707	0.0164	0.1317	0.0672	0.021	0.0079	0	0.1583	0	0.0336	0.0624	0.0281
SRRM1	1131	AA	10.1	9	10.2	0	0.9964	0.022	0.0018	1	1	1	1	1	1	1	1	1	1	1	1	1	1	1	1	1	1	1	1	1	1	1	1	1	1	1	1	1	1	1	1	1	1	1	1	1	1	1	1
SRRM1	1132	AA	8.1	7	8.2	0	1	0.3358	0.0254	1	0.9598	0.9869	0.9442	0.9502	0.9284	0.9276	0.944	0.9839	0.9917	0.9736	0.9801	0.9796	0.9766	0.9073	1	0.9542	0.959	0.96	0.9574	0.956	0.9642	0.9574	0.943	0.9731	0.9372	0.9655	0.9561	0.9631	0.9117	0.9057	0.9758	0.9709	0.9585	0.9397	0.9747	0.934	0.9319	0.9674	0.9515
SRRM1	1133	ES	04:05:00	3	6	0	0.9964	0.7357	0.0979	0.1864	0.0811	0.0889	0.0628	0.1494	0.016	0.0124	0.1019	0.0348	0.1629	0	0.0298	0.1119	0.1701	0.1019	0.0186	0.0585	0.0712	0.1107	0.1259	0.1747	0.1085	0.2277	0.0329	0.0832	0.0664	0.2006	0.1856	0.2868	0.0721	0.0451	0.1524	0.0426	0.0342	0.053	0.2677	0.0356	0.0044	0.1637	0.0936
CLIC4	1134	RI	6.2	6.1	6.3	0	1	0.0093	0.0012	1	0.9984	1	1	1	1	1	1	0.9978	1	1	1	0.9987	0.998	0.9989	1	1	0.9968	1	1	1	1	0.9982	0.9979	1	1	1	1	1	1	1	0.9988	1	0.9983	0.9987	0.9979	0.9982	0.999	0.9988	1
SYF2	1139	ES	3	2	4	0	1	0.0284	0.0056	1	0.9858	1	0.9792	0.997	0.9869	1	0.9939	0.9932	0.9957	1	0.9925	1	0.9906	0.9972	1	0.9943	0.9984	0.9964	0.9934	1	1	1	0.9954	0.9937	0.9873	0.9955	0.998	0.9854	0.9929	0.996	0.9824	0.9861	1	0.9888	1	0.9963	1	1	0.9965
C1orf63	1140	AP	2			0	1	0.5022	0.0817	0.9714	0.7826	0.8932	0.8328	0.6877	0.9563	0.9047	0.8693	0.9447	0.7805	0.9749	0.9088	0.9619	0.6229	0.8771	0.9247	0.8874	0.9356	0.8071	0.8798	0.8411	0.9033	0.8157	0.9255	0.8797	0.7243	0.8542	0.9044	0.834	0.7811	0.8886	0.6473	0.8768	0.8782	0.8299	0.8202	0.9383	0.8466	0.8639	0.7746
C1orf63	1141	AP	1			0	1	0.5022	0.0817	0.0286	0.2174	0.1068	0.1672	0.3123	0.0437	0.0953	0.1307	0.0553	0.2195	0.0251	0.0912	0.0381	0.3771	0.1229	0.0753	0.1126	0.0644	0.1929	0.1202	0.1589	0.0967	0.1843	0.0745	0.1203	0.2757	0.1458	0.0956	0.166	0.2189	0.1114	0.3527	0.1232	0.1218	0.1701	0.1798	0.0617	0.1534	0.1361	0.2254
C1orf63	1145	ES	5.1:5.2:6.1	4.2	6.2	0	0.9982	0.9747	0.2823	0	0.3233	0.4235	0.1721	0.4191	0	0.3115	0.1397	0.1549	0.5716	0.0081	0	0.7196	0.7804	0.3405	0.2858	0	0.1277	0.6971	0.4332	0.3046	0	0.3432	0.2705	0.4343	0.3072	0.1862	0.8727	0.1542	0	0.2343	0.5834	0	0.0407	0.5037	0.8782	0		0.6049	0.8742
C1orf63	1146	AA	6.1	4.2	6.2	0	0.9836	0.9578	0.2649	0.0769	0.5331	0	0.1827	0.4176	0.0907	0	0.2942	0	0.6026	0.0086	0.2716	0.6357	0.7921	0.1907	0	0.2743	0.2057	0	0.2207	0.3193	0.3798	0.5442	0	0.3985	0.3217	0.1268	0.5797	0.4109	0.5824	0.2466	0	0.1513	0.0435	0	0.9036	0.2488	0.8875	0.6021	0.7258
C1orf63	1147	ES	5.1:5.2:5.3	4.2	6.2	0	1	0.9538	0.2175	0.0176	0.3493	0.2443	0.067	0.3289	0.0167	0.1384	0.1903	0.0523	0.5117	0	0.1086	0.6666	0.7552	0.2845	0.0841	0.0841	0.169	0.4323	0.2726	0.3449	0.1568	0.3116	0.1116	0.3084	0.286	0.1534	0.7313	0.2016	0.3491	0.3146	0.3943	0.0592	0.0537	0.2994	0.808	0.0865	0.7759	0.5658	0.7097
C1orf63	1148	ES	4.2:5.1	4.1	5.2	0	0.9473	0	0	1	1	1		1		1	1	1	1		1	1	1	1			1	1	1	1	1	1	1	1	1	1	1	1	1	1	1	1		1	1	1	1	1	1
RHCE	1185	ES	07:08:09	6	10	0	0.8145	0.5683	0.0836	1	1			1	1	1		1	1	1	0.8719	1		1		1	1	1	0.8084	1		1	1	0.687	1	0.9567	1	0.9076	1	0.4317	1	1	0.8006	1	1		1	1	1
TMEM57	1189	ES	05:06:00	4	7	0	1	0.1851	0.0125	1	0.9878	1	1	0.9876	1	0.9553	1	1	1	1	0.9872	0.9508	1	0.9842	1	1	0.9935	1	1	0.991	1	1	0.9869	1	1	1	1	0.9908	1	1	0.9849	0.982	1	0.973	0.9699	1	1	1	1
TMEM57	1190	ES	2:3:4:5:6	1	7	0	1	0.036	0.0053	1	1	1	1	0.995	1	1	1	1	1	1	1	1	1	1	1	1	1	1	0.9839	1	1	1	1	1	0.9838	1	1	1	0.9739	1	0.9841	1	0.9824	1	0.9646	1	1	1	1
MAN1C1	1192	AP	4			0	1	0.781	0.1492	0.8324	0.8748	0.9431	0.709	0.8643	0.8887	0.7951	0.7525	0.6865	0.8297	0.9009	0.7331	0.7229	0.8295	0.8264	0.643	0.6946	0.6467	0.7435	0.7867	0.8184	0.9752	0.6707	0.5733	0.7455	0.7406	0.8022	0.7492	0.7951	0.8588	0.9016	0.3596	0.5463	0.437	0.5681	0.9566	0.6574	0.9499	0.4857	0.7127
MAN1C1	1193	AP	1			0	1	0.781	0.1492	0.1676	0.1252	0.0569	0.291	0.1357	0.1113	0.2049	0.2475	0.3135	0.1703	0.0991	0.2669	0.2771	0.1705	0.1736	0.357	0.3054	0.3533	0.2565	0.2133	0.1816	0.0248	0.3293	0.4267	0.2545	0.2594	0.1978	0.2508	0.2049	0.1412	0.0984	0.6404	0.4537	0.563	0.4319	0.0434	0.3426	0.0501	0.5143	0.2873
SEPN1	1195	ES	3	2	4	0	1	0.4311	0.0693	0.4094	0.2137	0.499	0.2851	0.1443	0.4088	0.2724	0.3247	0.2228	0.1974	0.2435	0.3106	0.2595	0.188	0.2624	0.1543	0.2734	0.273	0.1696	0.2833	0.2299	0.2429	0.2332	0.4233	0.2658	0.2688	0.2101	0.3399	0.2161	0.2875	0.1861	0.1949	0.3422	0.1473	0.2477	0.2464	0.1569	0.2055	0.17	0.1796
MTFR1L	1196	AP	4.1			0	1	0.5312	0.0947	0.248	0.3327	0.4269	0.146	0.3316	0.1392	0.1751	0.2033	0.2206	0.2969	0.105	0.1848	0.1452	0.4982	0.171	0.0933	0.1766	0.2531	0.372	0.4178	0.2886	0.2392	0.3052	0.1575	0.1999	0.1691	0.1698	0.4113	0.374	0.3597	0.5877	0.3192	0.2107	0.1909	0.2048	0.4288	0.2625	0.3049	0.1871	0.2636
MTFR1L	1197	AP	3.1			0	1	0.2602	0.0454	0	0.098	0.0507	0.0733	0.0744	0.0074	0.0784	0.0202	0.0926	0.0609	0	0.0075	0.0337	0.034	0.0552	0.0436	0.1146	0.0579	0.1703	0.0989	0.036	0.0102	0.1136	0.0263	0.0748	0.0395	0.0306	0.0897	0.0947	0.0987	0.0294	0.1145	0.0448	0.0589	0.0346	0.0904	0.1034	0.0451	0.1345	0.0462
MTFR1L	1198	AP	1			0	1	0.8196	0.1398	0.7064	0.5046	0.5224	0.7346	0.5295	0.8386	0.6855	0.6863	0.5798	0.6271	0.895	0.7337	0.7961	0.4426	0.724	0.8198	0.6302	0.6316	0.3884	0.4344	0.509	0.6902	0.5124	0.7901	0.603	0.6869	0.7237	0.4101	0.4643	0.5025	0.3421	0.4587	0.6734	0.7335	0.7264	0.3733	0.5744	0.6232	0.5785	0.6444
MTFR1L	1199	AP	2.1			0	1	0.2103	0.0376	0.0456	0.0647	0	0.0462	0.0645	0.0147	0.061	0.0901	0.107	0.0151	0	0.074	0.025	0.0252	0.0497	0.0432	0.0786	0.0574	0.0694	0.049	0.1664	0.0604	0.0688	0.0261	0.1223	0.1045	0.0758	0.0888	0.067	0.0391	0.0408	0.1077	0.071	0.0167	0.0342	0.1075	0.0597	0.0268	0.0999	0.0458
MTFR1L	1202	AT	10.5			0	1	0	0	0	0	0	0	0	0	0	0	0	0	0	0	0	0	0	0	0	0	0	0	0	0	0	0	0	0	0	0	0	0	0	0	0	0	0	0	0	0	0	0
MTFR1L	1204	AT	11			0	1	0	0	1	1	1	1	1	1	1	1	1	1	1	1	1	1	1	1	1	1	1	1	1	1	1	1	1	1	1	1	1	1	1	1	1	1	1	1	1	1	1	1
MTFR1L	1205	AA	10.1:10.2:10.3	9	10.4	0	1	0.04	0.0056	0.9867	1	0.9922	1	0.977	1	0.9961	1	0.9919	1	1	1	0.995	1	0.9942	1	1	1	1	1	0.9921	1	0.9937	1	1	1	1	0.9959	0.9958	1	1	1	0.9931	1	0.9931	1	1	1	1	0.9924
MTFR1L	1207	AA	10.3	9	10.4	0	0.9582	0.2239	0.04	0.9229	1	0.9041	1	0.9097	1	0.9721	1	0.8605	1		1	0.9571	1	0.9704	1	1	1	1	1	0.9192	1	0.9097	1	1		1	0.9731	0.9256	1	1	1	0.9446	1	0.9339	1	1	1	1	0.919
MTFR1L	1208	AA	10.1	9	10.2	0	1	0.1658	0.022	1	0.9514	0.9846	0.9899	0.9497	0.9721	0.9674	0.9485	0.9587	0.9301	0.9794	0.9644	0.9763	0.9618	0.943	0.9184	0.98	0.9885	0.9697	0.9437	0.986	0.9877	0.9194	0.9878	0.9766	1	0.9797	1	0.9675	0.9687	1	0.986	0.951	0.9897	0.9781	0.9683	0.927	1	1	0.9744
MTFR1L	1209	AA	10.1:10.2	9	10.3	0	1	0.2458	0.0399	0.8756	0.9259	0.9402	0.9241	0.8288	0.9297	0.8914	0.8947	0.9579	0.8827	0.9643	0.8816	0.9082	0.8404	0.8571	0.8383	0.9147	0.8984	0.8973	0.8954	0.9241	0.9247	0.9453	0.8813	0.876	0.9412	0.9127	0.8879	0.9543	0.9125	0.8251	0.899	0.9057	0.9168	0.9191	0.8439	0.8981	0.909	0.886	0.9276
MTFR1L	1210	AA	10.2	9	10.3	0	0.9109	0.8714	0.1303	0	0.397	0.2058	0.1151	0.2091	0.2777	0.2182	0.3207	0.5012	0.3715		0.222	0.1978	0.1754	0.2717	0.3121	0.1861	0.0952	0.2216	0.3564	0.1536	0.1347	0.6109	0.0848	0.149		0.1833	0	0.4191	0.2537	0	0.1134	0.3399	0.1049	0.2078	0.1516	0.4166	0	0	0.257
MTFR1L	1211	ME	5|6	4.2	7.2	0	0.9691	0.6907	0.1386	0.5403	0.4752	0.7475	0.8624	0.7049	0.5373	0.9039	0.7288	0.8069	0.6268	0.8932	0.5783	0.8175	0.8246	0.6621	0.6764	0.6895	0.8298	0.6352	0.7149	0.6501	0.9495	0.5913	0.657	0.6873	0.8988	0.4752	0.589	0.5266	0.687	0.8624	0.7739	0.7288	0.7951		0.6766	0.6105	0.8932	0.7114	0.6881
MTFR1L	1212	AA	7.1	4.2	7.2	0	0.9945	0.5432	0.08	0	0.1629	0.0278	0	0.0884	0	0.0465	0.0431	0.142	0.093	0.0278	0.0179	0.0529	0.0462	0.0116	0	0.0491	0.0376	0.1176	0.0964	0.127	0.086	0.1967	0.0924	0.0948	0.0351	0.0138	0.147	0.188	0.1633	0.0223	0.081	0.0336	0.0201	0	0.1847	0.0273	0.065	0.0313	0.1053
MTFR1L	1213	ES	6	4.2	7.2	0	0.9945	0.608	0.0855	0.1321	0.167	0.0958	0.0241	0.095	0.0702	0.006	0.0465	0.0409	0.1058	0.0258	0.1524	0.0745	0.0566	0.055	0.066	0.1132	0.0515	0.1983	0.0762	0.0919	0.0143	0.1795	0.0974	0.1459	0.043	0.1152	0.2103	0.2875	0.1077	0.0208	0.0469	0.07	0.0425	0.0092	0.1214	0.0649	0.0159	0.1214	0.1158
MTFR1L	1214	ES	5	4.2	7.2	0	0.9982	0.7519	0.0984	0.1518	0.1537	0.2389	0.1342	0.2004	0.0805	0.0537	0.1159	0.1513	0.1658	0.1813	0.1979	0.265	0.2199	0.1023	0.1287	0.2208	0.2093	0.301	0.1713	0.1582	0.2148	0.2404	0.1713	0.2729	0.2854	0.1054	0.2762	0.3098	0.2093	0.1173	0.1443	0.1682	0.147	0.0553	0.2242	0.0981	0.1188	0.2541	0.2241
AUNIP	1219	AT	3.2			0	1	0.3361	0.0551	0.3946	0.4628	0.4228	0.3643	0.4801	0.4146	0.4943	0.4323	0.429	0.5075	0.5151	0.4608	0.4834	0.5418	0.4794	0.5008	0.5151	0.6226	0.4331	0.4607	0.406	0.4159	0.4603	0.4571	0.5361	0.4248	0.4523	0.5635	0.5659	0.4535	0.6417	0.5281	0.5401	0.5209	0.5606	0.4833	0.5225	0.5192	0.4421	0.4647
AUNIP	1220	AT	4			0	1	0.3361	0.0551	0.6054	0.5372	0.5772	0.6357	0.5199	0.5854	0.5057	0.5677	0.571	0.4925	0.4849	0.5393	0.5166	0.4582	0.5206	0.4992	0.4849	0.3774	0.5669	0.5393	0.594	0.5841	0.5397	0.5429	0.4639	0.5752	0.5477	0.4365	0.4341	0.5465	0.3583	0.4719	0.4599	0.4791	0.4394	0.5167	0.4775	0.4808	0.5579	0.5353
STMN1	1221	AP	3			0	1	0.0625	0.008	0.0104	0.0108	0.0116	0.0088	0.012	0.0161	0.0192	0.0195	0.0225	0.017	0.0057	0.0256	0.0172	0.0179	0.0193	0.0172	0.0212	0.0281	0.0216	0.009	0.0125	0.0154	0.0273	0.0175	0.0118	0.0116	0.0168	0.0207	0.0251	0.0156	0.0293	0.0181	0.0119	0.0156	0.0153	0.0265	0.0176	0.0283	0.0184	0.0169
STMN1	1222	AP	4			0	1	0.0259	0.0027	0	0.0016	0	0.0022	0	0	0.0006	0	0.0018	0	0	0.0011	0	0.0019	0.0007	0	0	0.0005	0.0047	0	0	0.0011	0.0013	0	0.0033	0.008	0.0008	0.0006	0.0027	0.002	0	0.0007	0.0014	0	0.0018	0	0	0	0	0.0014
STMN1	1223	AP	2			0	1	0.0753	0.0091	0.9889	0.9876	0.9884	0.989	0.9872	0.9839	0.9796	0.979	0.9757	0.983	0.9943	0.9727	0.9813	0.9797	0.9796	0.9773	0.9772	0.9712	0.9736	0.991	0.9862	0.9835	0.9708	0.9815	0.985	0.9776	0.9813	0.9778	0.9709	0.9814	0.9682	0.9812	0.9861	0.9844	0.982	0.9706	0.9824	0.9717	0.9816	0.9811
STMN1	1224	AP	1			0	1	0.0184	0.0016	0.0008	0	0	0	0.0009	0	0.0006	0.0014	0	0	0	0.0005	0.0015	0.0005	0.0004	0.0055	0.0016	0.0002	0	0	0.0013	0	0.0006	0.001	0	0.0027	0.0012	0.0009	0.0014	0.001	0.0025	0	0.0007	0	0.0009	0.003	0	0	0	0.0007
STMN1	1225	AT	9			0	1	0.0189	0.0022	0.0016	0.005	0.0043	0.0014	0.0075	0.0003	0.0016	0.0034	0.0011	0.0006	0.0016	0.0002	0.0008	0.0015	0.002	0.008	0.0015	0.0019	0.0025	0.0017	0.0014	0.0012	0.0009	0.0026	0.0043	0.0107	0	0.0013	0.0022	0.0034	0.001	0.0006	0.0027	0.0017	0.0009	0.001	0.003	0.0014	0.0084	0.0031
STMN1	1226	AT	8			0	1	0.0189	0.0022	0.9984	0.995	0.9957	0.9986	0.9925	0.9997	0.9984	0.9966	0.9989	0.9994	0.9984	0.9998	0.9992	0.9985	0.998	0.992	0.9985	0.9981	0.9975	0.9983	0.9986	0.9988	0.9991	0.9974	0.9957	0.9893	1	0.9987	0.9978	0.9966	0.999	0.9994	0.9973	0.9983	0.9991	0.999	0.997	0.9986	0.9916	0.9969
ZNF593	1230	RI	2.2	2.1	2.3	0	1	0.0649	0.0081	0.0146	0.0065	0	0.0062	0.0074	0	0.0015	0.0199	0.0017	0.0138	0	0.0046	0.0021	0.0132	0.0039	0	0.0045	0.0037	0.0024	0.0025	0.0058	0.0021	0.0246	0.0058	0.0047	0.0182	0	0.0252	0.0137	0.0212	0.0079	0.0057	0.0031	0.0032	0.0035	0.0136	0.0021	0.0161	0.0078	0.0143
CNKSR1	1231	AP	1.1			0	0.9909	0.5403	0.0699	0.8553	0.8553	1		0.9526	0.9118	0.9539	0.9923	1	0.8064	0.9688	0.4963	0.9301	0.8159	0.9315		0.9841	0.9741	0.9238	1	0.8842	1	0.866	0.9449	0.9956	0.8933	0.9825	0.9822	0.922	0.9118	0.9104	0.9337	0.9647	0.8947	0.8591	1	0.9155	1	0.9674	0.9354
CNKSR1	1232	AP	2.1			0	0.9909	0.5403	0.0699	0.1447	0.1447	0		0.0474	0.0882	0.0461	0.0077	0	0.1936	0.0312	0.5037	0.0699	0.1841	0.0685		0.0159	0.0259	0.0762	0	0.1158	0	0.134	0.0551	0.0044	0.1067	0.0175	0.0178	0.078	0.0882	0.0896	0.0663	0.0353	0.1053	0.1409	0	0.0845	0	0.0326	0.0646
CNKSR1	1236	RI	10.2	10.1	10.3	0	0.9673	0.7415	0.1285		0.3447			0.2919	0.1301	0.2861	0.2089	0.3594	0.3594	0.0655			0.4644	0.3907		0.0507	0.2915	0.1895	0.1876	0.1669	0.3146	0.4443	0.2048	0.2128	0.1009	0.172	0.366	0.282	0.3477	0.2722	0.2645	0.0702	0.0742	0.1301	0.5885	0.265	0.2376	0.3548	0.2075
CNKSR1	1237	AA	10.1	9	10.2	0	0.7782	0.3486	0.0575		0.9338			0.9438		1	0.9506		1			1	1	1			0.9213	0.9094	1		1	0.9503	0.9127	1		1	0.9566	1	1	1	1			1	1	1	1	1	1
CNKSR1	1238	AD	8.2	8.1	9	0	0.9764	0.5894	0.0857		0.1161	0.2587		0.1025	0.1963	0.2498	0.2067	0.4488	0.3238	0.2135	0.1887	0.1256	0.236	0.482		0.0991	0.1324	0.1442	0.3175	0.3	0.2783	0.1943	0.2003	0.1715	0.2307	0.1102	0.1436	0.2067	0.3259	0.2794	0.212	0.1065	0.1932	0.2893	0.1186	0.1324	0.3828	0.1679	0.1275
CNKSR1	1239	AA	6.1	5	6.2	0	0.9764	0.1569	0.0208	1	0.9649			0.9821	1	1	0.9785	0.8836	0.9649	1		1	1	1		1	1	1	1	1	1	0.916	1	1	1	1	1	0.9552	1	1	0.9636	1	1	1	1	1	1	0.9801	0.9785
CNKSR1	1240	AD	1.2	1.1	2.2	0	0.9636	0.5135	0.0897		0.6127			0.6018	0.8818	0.9299	0.7902	0.7132	0.8969	0.6237		0.7886	0.4948	0.8587		0.9601	0.8371	0.7755	0.7566	0.853	0.6885	0.7768	0.81	0.7509	0.7132	0.8326	0.7969	0.8056	0.9278	0.7991	0.9145	0.759	0.9086	0.7293	0.8681	0.7397	0.7922	0.7177	0.7342
CEP85	1243	RI	14.3	14.2	14.4	0	1	0.0285	0.002	1	1	1	1	1	1	1	1	1	1	1	1	1	1	1	1	1	1	1	1	1	1	1	1	1	1	1	1	1	1	1	1	1	1	1	1	1	1	1	1
CEP85	1244	AA	14.1	13	14.2	0	0.98	0.6803	0.0851	0.139	0.3406	0.3349	0.212	0.2361	0.219	0.3675	0.2251	0.2888	0.2498	0.3427	0.2235	0.5198	0.2823	0.2636	0.1804	0.3305	0.3031	0.2397	0.2933	0.2808	0.2956	0.3074	0.2616	0.2342	0.1623	0.239	0.2452	0.2721	0.3427	0.1719	0.2742	0.1497	0.2052	0.3333	0.3373	0.2108	0.4647	0.2973	0.2323
CEP85	1245	ES	3	2	4	0	0.9982	0.1461	0.0095	1	1	1	0.9209	1	1	1	1	1	1	1	1	1	1	1	1	1	1	1	1	1	1	1	1	1	1	1	0.9921	1	1	1	1	1	1	1	1	1	1	1	1
SH3BGRL3	1246	RI	2.2	2.1	2.3	0	1	0.0635	0.0085	0.0209	0.0344	0.0219	0.0191	0.0275	0.0225	0.0224	0.0149	0.0191	0.0279	0.0151	0.0154	0.0268	0.0191	0.0252	0.0234	0.0205	0.019	0.0161	0.0285	0.0231	0.0171	0.017	0.0131	0.0177	0.0179	0.0119	0.0122	0.018	0.0306	0.0146	0.0232	0.0129	0.0078	0.0171	0.0173	0.0418	0.0296	0.0162	0.0235
UBXN11	1249	AT	12.2			0	1	0.8331	0.1384	0.3088	0.5907	0.8331	0.3407	0.6569	0.2189	0.5019	0.5552	0.3479	0.6433	0.113	0.5507	0.376	0.7341	0.5063	0.1998	0.4218	0.5224	0.6109	0.6715	0.636	0.4996	0.6569	0.4989	0.6473	0.5445	0.5365	0.6462	0.6036	0.6889	0.311	0.469	0.1408	0.211	0.2098	0.6606	0.5231	0.5128	0.5569	0.6608
UBXN11	1250	AT	17			0	1	0.8331	0.1384	0.6912	0.4093	0.1669	0.6593	0.3431	0.7811	0.4981	0.4448	0.6521	0.3567	0.887	0.4493	0.624	0.2659	0.4937	0.8002	0.5782	0.4776	0.3891	0.3285	0.364	0.5004	0.3431	0.5011	0.3527	0.4555	0.4635	0.3538	0.3964	0.3111	0.689	0.531	0.8592	0.789	0.7902	0.3394	0.4769	0.4872	0.4431	0.3392
UBXN11	1251	ES	10	9	11	0	0.9964	0.3061	0.0452	1	0.9609		0.9385	0.9164	1	0.9802	0.9219	1	0.9541	1	1	0.8912	0.8926	0.9281		1	0.9589	0.8077	0.9636	1	0.9565	0.9255	0.9167	0.983	1	0.9635	0.9441	0.9762	0.9747	0.931	0.9406	0.9804	1	1	0.9113	0.9201	0.951	0.9689	0.8981
UBXN11	1252	ES	7:8:9:10	6	11	0	0.9855	0.3816	0.0351	1	1		1	0.9543	1	1	0.9594	1	1	1	1	1	1	1	1	1	0.8943	1	1	0.8771	1	0.9684	1	1	1	1	1	0.981	1	1	1	1	0.8661	1	1	1	1	0.9786	1
UBXN11	1254	ES	6	5	7	0	0.9891	0.8422	0.1262	0.5292	0.7124	0.8126	0.4523	0.3636	0.3251	0.5828	0.4071	0.3486	0.591	0.726	0.4907	0.3024	0.469	0.5584		0.3663	0.2939	0.6645	0.7066	0.2175	0.5584	0.4779	0.3349	0.5483	1	0.4401	0.3675	0.4888	0.3525	0.4146	0.3735	0.5374	0.241	0.4103	0.5376	0.4984	0.5201	0.5928	0.4159
UBXN11	1255	ES	3:4:5:6:7:8:9	2	10	0	0.7964	0.984	0.2524				0.1516	0.3625		1	0.5928		0.3109		0.7212		0.6241	0.1964			0.2449	0.6474	1		0.1989	0.5798	0.5737	1	0.6483	0.1934	0.44	0.7988		0.528	0.1567	0.6441	0.049	1	0.6829	0.5715	0.5166	1	0.7594
UBXN11	1256	ES	4:5:6:7:8:9	2	10	0	0.9855	0.8827	0.1598	1	0.8344	1	0.586	0.7011		1	0.7802	1	0.7905	1	0.8956	0.4773	0.8699	0.6712	1	1	0.6549	0.8601	1	0.7392	0.799	0.874	0.8931	1	0.9151	0.6585	0.7804	0.9159	1	0.7408	0.6267	0.8983	0.1465	1	0.9524	0.804	0.9169	1	0.8444
UBXN11	1258	ES	3:4:5:7:8:9	2	10	0	0.8655	0.9881	0.2232				0.2348	0.6186	0.7233	1	0.7509	1	0.3234		0.8294		0.8332	0.2899		1	0.5632	0.5778	1	0.7774		0.6692	0.7664	1		0.4038	0.6512	0.8629	1	0.7442	0.3379	0.6952	0.2826	1	0.7197	0.7513	0.5288	1	0.8727
UBXN11	1259	ES	4:5:7:8:9	2	10	0	0.9873	0.6746	0.1026	1	0.7793		0.6979	0.8615	0.8301	1	0.8745	1	0.797	1	0.9372	0.7315	0.9483	0.7635		1	0.8749	0.8168	1	0.9635	0.798	0.9117	0.9512	1		0.8321	0.8935	0.9438	1	0.8584	0.8147	0.9157	0.5211	1	0.96	0.8927	0.9203	1	0.9178
UBXN11	1260	ES	5:7:8:9	2	10	0	0.7509	1	0.2176				0.1114	0.5703	0.7252	1	0.341	1	0.2646					0.2762			0.5066			0.7375	0.3582	0.4769		1		0.5826	0.4929	0.6207	1		0.541	0.5184	0.0755	1		0.6213		1	0.6983
UBXN11	1261	ES	03:04:00	2	5	0	0.8564	0.972	0.2082				0.7314	0.5805	0.4894	0.5931	0.8835	0.5444	0.5917		0.8439		0.8764	0.5447		0.7419	0.6169	1	0.9002	0.6086		0.7292	1	0.5812		0.3433	0.7041	0.8181		1	0.3557	0.7404	0.8319	0.6593	0.8056	0.6723		0.4901	0.7733
UBXN11	1262	ES	4	2	5	0	0.9927	0.7382	0.0974	1	0.9478	1	0.9512	0.8339	0.6405	0.877	0.9403	0.7504	0.9195	0.9004	0.9378	0.9286	0.9617	0.8997	0.8244	0.9463	0.8877	1	0.9441	0.9146	0.8825	0.9269	1	0.9403	1	0.7859	0.9074	0.9181	0.9399	1	0.8116	0.9235	0.9308	0.9564	0.9724	0.8429	1	0.8053	0.8397
UBXN11	1263	ES	3	2	4	0	0.9382	0.6878	0.1058			0.0503	0.1501	0.2533		0.195	0.3744		0.1351	0.2028	0.2977	0	0.2533	0.1538		0.1749	0.1937	0.2977	0.4079	0.1749	0.0833	0.2134	0.1878	0.0939	0.145	0.1486	0.2153	0.345	0.0598	0.4328	0.1504	0.2269	0.2977	0.0996	0.121	0.2977	0.1238	0.2334	0.4236
LIN28A	1271	RI	4.2	4.1	4.3	0	0.9964	0.5065	0.1075	1	0.8598	1	1	0.8734	1	1	0.7931	1	1		1	1	1	1	1	0.751	0.7541	0.8989	1	0.7445	0.5247	0.9088	0.8957	0.9246	1	0.8466	0.9364	1	1	0.9787	1	1	0.7995	1	1	1	0.7659	0.7561	0.7541
DHDDS	1272	AT	6.2			0	1	0.2208	0.0366	0.0585	0.118	0.0828	0.0502	0.1591	0.1722	0.1877	0.1055	0.1161	0.1199	0.0714	0.1582	0.217	0.1521	0.1109	0.1165	0.0687	0.1129	0.1656	0.1254	0.1033	0.2471	0.0886	0.1365	0.1146	0.1088	0.1126	0.0764	0.0683	0.1401	0.0704	0.1005	0.165	0.0805	0.0993	0.1092	0.1265	0.1946	0.0726	0.0841
DHDDS	1273	AT	10.2			0	1	0.4884	0.0697	0.8541	0.8039	0.798	0.8968	0.7531	0.7342	0.7271	0.8284	0.8143	0.7522	0.8691	0.7646	0.734	0.6583	0.7904	0.8408	0.8252	0.7921	0.7076	0.7699	0.7733	0.6127	0.8319	0.7751	0.8326	0.8062	0.8299	0.8363	0.7852	0.763	0.6206	0.7848	0.7315	0.8495	0.831	0.7004	0.7822	0.6386	0.8423	0.8372
DHDDS	1274	AT	7			0	1	0.3097	0.0537	0.0875	0.0781	0.1191	0.0529	0.0879	0.0937	0.0852	0.0661	0.0695	0.1279	0.0595	0.0772	0.049	0.1896	0.0987	0.0426	0.1061	0.0951	0.1268	0.1047	0.1234	0.1403	0.0795	0.0884	0.0527	0.0849	0.0575	0.0873	0.1465	0.0969	0.309	0.1148	0.1035	0.07	0.0697	0.1903	0.0913	0.1668	0.0851	0.0787
DHDDS	1275	AA	10.1	9	10.2	0	1	0.4765	0.0702	0.2195	0.0925	0.3675	0.1753	0.2374	0.0934	0.1949	0.2311	0.2727	0.1537	0.2664	0.2167	0.2031	0.1895	0.2511	0.1326	0.1623	0.2405	0.1759	0.2074	0.2838	0.1949	0.1889	0.2225	0.1552	0.1157	0.2916	0.2746	0.1989	0.0787	0.2714	0.2687	0.3389	0.2031	0.2017	0.2321	0.1719	0.219	0.3079	0.151
DHDDS	1276	ES	6.1	5	8	0	1	0.2978	0.0382	0.9777	0.8633	0.9563	0.9635	0.9261	0.9735	0.9285	0.907	0.853	0.9621	0.9637	1	0.9714	0.9194	0.9528	0.9442	0.9332	0.8999	0.9378	0.913	0.9343	0.8943	0.9561	0.9802	0.9072	0.9099	0.9665	0.9357	0.9675	0.8938	0.9501	0.8409	0.9477	0.9766	0.8797	0.9408	0.9596	0.8712	0.9703	0.9447
DHDDS	1277	ES	5	4.2	6.1	0	1	0.1213	0.0089	1	1	1	1	0.9923	1	1	1	1	1	1	1	1	1	0.9652	1	1	1	1	1	0.9851	1	1	1	1	1	1	0.9962	1	1	1	0.99	1	1	1	1	0.9865	1	1	1
DHDDS	1278	AA	4.1	3	4.2	0	1	0.2839	0.0472	0	0.1053	0.0594	0	0.026	0.023	0.0122	0.0429	0.0152	0.058	0	0.043	0.1311	0.0769	0.012	0.0212	0.1509	0.1221	0.0476	0.0678	0.104	0	0.1014	0.0264	0.0678	0.0625	0.1026	0.1224	0.1296	0.0418	0.0909	0.0665	0.0132	0.0346	0.0264	0.0853	0.0343	0.0175	0.0329	0.0299
RPS6KA1	1279	AP	3			0	0.9964	0.2981	0.0442	0	0.0123	0.1481	0.0622	0.0202	0.0364	0.0469	0.0325	0.1683	0.0311	0	0	0	0.0769	0.0467	0	0.0559	0.0144	0	0.0194	0.0886	0.0716	0.0224	0.0445	0.0312	0	0.0283	0.0036	0	0.0133	0.0797	0.0227	0.0651	0.0367	0	0.0272	0	0.0277	0	0.0231
RPS6KA1	1280	AP	1			0	0.9964	0.9624	0.2161	0.2702	0.7196	0.6617	0.3829	0.3065	0.492	0.7445	0.6848	0.5197	0.3786	0.7945	0.4019	0.3529	0.519	0.6568	0.2654	0.6764	0.932	0.4389	0.7526	0.7623	0.8885	0.3285	0.7422	0.9096	0.8986	0.7378	0.9436	0.3111	0.7763	0.7781	0.8466	0.6073	0.7379	0.4856	0.7007	0.4131	0.9257	0.3583	0.653
RPS6KA1	1281	AP	7			0	0.9964	0.8789	0.1924	0.471	0.205	0	0.5123	0.6354	0.4217	0.2086	0.1716	0.312	0.537	0.1484	0.568	0.6065	0.3251	0.2165	0.5057	0.2486	0.0536	0.4319	0.1947	0.0986	0.0398	0.5242	0.1981	0.0485	0.0732	0.1733	0.0404	0.5884	0.1991	0.0739	0.1013	0.2607	0.194	0.5011	0.2721	0.5592	0.0308	0.5462	0.2054
RPS6KA1	1282	AP	5			0	0.9964	0.3556	0.0622	0.2588	0.0631	0.1902	0.0426	0.038	0.0499	0	0.1111	0	0.0533	0.0571	0.0301	0.0406	0.079	0.0799	0.2288	0.0191	0	0.1292	0.0333	0.0506	0	0.1248	0.0152	0.0107	0.0282	0.0606	0.0124	0.1006	0.0113	0.0682	0.0294	0.0668	0.0314	0.0133	0	0.0278	0.0158	0.0956	0.1185
RPS6KA1	1286	AA	16.1	15	16.2	0	1	0.093	0.0092	0.907	0.9894	1	0.9433	0.9912	1	1	1	1	1	1	1	1	0.9801	0.9926	1	0.9895	0.9965	1	0.9871	1	1	1	1	1	1	0.9906	0.9912	1	1	1	1	1	0.9782	0.9919	1	0.992	1	0.9934	1
RPS6KA1	1287	ES	12	11	13	0	0.9982	0.0714	0.0111	0	0.0056	0	0	0.0021	0.0071	0.0237	0.0241	0.0113	0.0222	0	0.0147	0	0.0081	0.0094	0.0182	0.0064	0	0.0072	0.0087	0	0	0.005	0	0.0046	0	0.0057	0.0368	0	0.0051	0	0	0	0	0	0.0118	0.0051	0.0154	0	0.0078
RPS6KA1	1289	ES	8	4	9	0	0.9964	0.1307	0.0139	1	1	0.9772	1	0.9922	1	0.9815	0.9712	1	1	1	1	0.9793	0.985	0.966	1	1	0.9972	1	1	0.9854	1	1	1	0.9935	0.9608	0.9667	0.9923	1	0.985	0.9866	1	0.9734	0.9887	0.9904	1	0.9895	0.9926	0.9915	0.987
RPS6KA1	1290	ES	08:09:00	4	10	0	0.9964	0.0297	0.0037	1	1	1	1	1	1	1	1	1	1	1	1	1	1	1	1	1	0.9975	1	1	1	1	1	1	1	1	1	0.9964	1	1	0.9873	0.9956	1	1	1	1	1	1	1	1
RPS6KA1	1292	ES	2	1	4	0	0.8964	0.0992	0.0184		0	0	0	0.0079	0	0	0.0091	0	0	0	0		0.0499	0		0.0151	0	0	0.0298	0	0	0	0.019	0.0185	0	0	0		0	0.0927	0.0052	0	0	0.0239	0.0268	0.014	0.011	0.0086	0
ARID1A	1293	AP	2.1			0	0.96	0.8728	0.1272		0		0	0	0	0	0.2291	0	0.2238		0.0744		0.4189	0.1586	0	0	0	0	0	0	0.1229	0.1468	0	0.1521	0	0	0.0634	0	0	0.1117	0.0197	0	0.0316	0	0	0	0.1002	0.0421	0
ARID1A	1295	AP	1			0	0.96	0.8728	0.1272		1		1	1	1	1	0.7709	1	0.7762		0.9256		0.5811	0.8414	1	1	1	1	1	1	0.8771	0.8532	1	0.8479	1	1	0.9366	1	1	0.8883	0.9803	1	0.9684	1	1	1	0.8998	0.9579	1
ARID1A	1296	AA	18.1	17	18.2	0	1	0.0481	0.0061	1	1	1	0.9846	0.9913	1	0.9532	1	1	1	1	0.9925	1	1	1	1	1	1	1	0.9817	0.9535	1	0.9891	1	1	1	1	1	1	1	0.9902	1	1	1	1	1	1	1	1	1
ARID1A	1297	ES	18.1:18.2	17	19	0	1	0.0709	0.0038	1	1	1	1	1	1	1	1	1	1	1	1	1	0.9897	1	1	1	1	1	1	1	1	1	1	1	1	1	1	1	1	1	0.9976	1	1	1	1	1	1	1	1
PIGV	1299	AP	1			0	0.9891	0.7756	0.1664	0.3077	0.5594	0.5714	0.4994	0	0.4035	0.5491	0.4545	0.4969	0.137	0.597	0.2623	0.321	0.2384	0.2132	0.3077	0.3983	0.3262	0.5479	0.4878	0.4769	0.4437	0.1619	0.1896	0.479	0.4624	0.32	0.4969	0.2703	0.1923	0	0.3622	0.3306	0.2286	0.3077	0.6607	0.3025	0.5634	0.2619	0.2817
PIGV	1300	AP	2.1			0	0.9891	0.7756	0.1664	0.6923	0.4406	0.4286	0.5006	1	0.5965	0.4509	0.5455	0.5031	0.863	0.403	0.7377	0.679	0.7616	0.7868	0.6923	0.6017	0.6738	0.4521	0.5122	0.5231	0.5563	0.8381	0.8104	0.521	0.5376	0.68	0.5031	0.7297	0.8077	1	0.6378	0.6694	0.7714	0.6923	0.3393	0.6975	0.4366	0.7381	0.7183
PIGV	1301	RI	4.2	4.1	4.3	0	1	0.2351	0.0198	1	1	0.9695	0.9861	1	0.9919	1	0.9824	0.9553	1	0.972	0.9747	0.9454	1	1	1	1	0.9925	0.9754	1	1	0.9763	0.9836	1	1	0.8954	0.9443	1	1	1	1	0.9884	0.9849	0.9666	0.988	1	1	1	1	0.9711
PIGV	1302	AD	2.3	2.2	3	0	0.94	0.8489	0.19		0.5299	1	0.5972	0.7401	0.9025	0.8465	0.8741	0.8103	0.7459	1	0.8617	0.5684	0.8081	0.6685	0.1511	0.6221	0.7778	1	1	0.5547	0.6283	0.4537	0.479	0.6567	0.7763	1	1	1	0.7022	0.7516	1	1	1	0.602	0.5456	0.577	0.5662	0.6317	0.7401
PIGV	1303	AD	2.2:2.3	2.1	3	0	0.9727	0.6843	0.1311	0.2225	0.1945	0.2591	0.1644	0.2832	0.2635	0.3951	0.2155	0.4389	0.266	0.2635	0.1964	0.3389	0.3881	0.1275	0.0598	0.2132	0.2394	0.417	0.4819	0.2781	0.2882	0.1718	0.3337	0.2159	0.5209	0.3069	0.6319	0.1827	0.2832	0.2145	0.5441	0.34	0.2464	0.3982	0.5535	0.2296	0.2762	0.2586	0.1723
PIGV	1304	AD	2.2	2.1	3	0	0.8091	0.6728	0.1317	0.2021	0.1918	0	0.1814	0.1385	0.0808	0.2158	0.0633		0.1645		0.0657	0.3453	0.2753	0.0905	0.4129	0.1111	0.1233			0.2968	0.1753	0.1596	0.3714	0.228	0.3104	0		0.0733	0.2196	0.161	0	0.2021	0.1076			0.1495	0.2968	0.3425	0.2348
ZDHHC18	1305	AP	2			0	1	0.1284	0.0127	0	0	0	0	0	0	0	0	0	0	0	0.0451	0	0	0	0	0	0	0	0	0	0	0	0	0	0	0	0	0	0	0	0	0	0	0	0	0	0	0	0
ZDHHC18	1306	AP	1			0	1	0.1284	0.0127	1	1	1	1	1	1	1	1	1	1	1	0.9549	1	1	1	1	1	1	1	1	1	1	1	1	1	1	1	1	1	1	1	1	1	1	1	1	1	1	1	1
GPN2	1307	AP	1.1			0	0.9982	0.7135	0.0701	0.8696	1		1	0.8639	1	0.9495	0.9626	1	1	1	0.8901	1	0.9568	0.8955	1	1	1	0.9544	1	0.9709	0.9766	0.9744	0.9624	1	0.9645	0.9536	0.9917	0.9585	1	1	1	1	1	0.9685	0.7598	0.9201	0.982	0.952	1
GPN2	1308	AP	3			0	0.9982	0.7135	0.0701	0.1304	0		0	0.1361	0	0.0505	0.0374	0	0	0	0.1099	0	0.0432	0.1045	0	0	0	0.0456	0	0.0291	0.0234	0.0256	0.0376	0	0.0355	0.0464	0.0083	0.0415	0	0	0	0	0	0.0315	0.2402	0.0799	0.018	0.048	0
GPN2	1311	RI	1.2	1.1	1.3	0	0.9982	0.0164	0.0015	1	1		1	1	1	1	1	1	1	1	1	1	1	1	1	1	1	0.9836	1	1	1	1	1	1	1	1	1	1	1	1	1	1	1	1	1	1	1	1	1
SLC9A1	1312	AT	12			0	1	0.2222	0.0326	0.9508	0.9325	0.9524	0.9608	0.923	0.9287	0.9425	0.9639	0.9793	0.9447	0.9751	0.9705	0.9639	0.897	0.9467	0.9751	0.9296	0.9332	0.9593	0.9032	0.8795	0.9442	0.9565	0.969	0.9738	0.9564	0.9465	0.9207	0.9191	0.9057	0.8752	0.9667	0.9696	0.9729	0.9651	0.9547	0.9677	0.8965	0.96	0.9493
SLC9A1	1313	AT	5.2			0	1	0.2222	0.0326	0.0492	0.0675	0.0476	0.0392	0.077	0.0713	0.0575	0.0361	0.0207	0.0553	0.0249	0.0295	0.0361	0.103	0.0533	0.0249	0.0704	0.0668	0.0407	0.0968	0.1205	0.0558	0.0435	0.031	0.0262	0.0436	0.0535	0.0793	0.0809	0.0943	0.1248	0.0333	0.0304	0.0271	0.0349	0.0453	0.0323	0.1035	0.04	0.0507
SLC9A1	1314	ES	2	1	3	0	1	0.0434	0.0077	1	1	1	0.9873	1	1	0.9767	1	0.9822	0.9909	1	0.9851	1	1	1	1	1	0.9929	0.9897	1	1	1	0.9927	0.9919	1	1	0.9936	0.9894	1	0.9702	0.9922	1	1	0.994	0.9835	1	1	1	0.9918	0.9864
WDTC1	1317	RI	16.2	16.1	16.3	0	1	0.0087	0.0009	1	1	1	1	1	1	1	1	1	1	1	1	1	1	1	1	1	1	1	1	1	1	1	1	1	1	1	1	1	1	1	1	1	1	1	1	1	1	1	1
WDTC1	1318	AA	15.1	14	15.2	0	1	0.1609	0.0235	0.9626	0.9508	0.9583	0.9512	0.9696	0.9555	0.945	0.9054	1	0.9877	1	0.9493	0.969	0.9228	0.9849	0.8598	0.9733	0.9427	0.9367	0.9814	0.9822	0.9769	0.9637	0.9427	0.9603	0.9034	0.9069	0.9141	0.9377	0.9334	0.9552	0.9818	0.9603	0.9498	0.9553	0.9633	0.9678	1	0.9668	0.9397
WDTC1	1319	AA	11.1	10	11.2	0	1	0.1927	0.0285	0.9427	0.9575	0.9414	0.9332	0.9482	0.9673	0.9611	0.9071	0.9785	0.9785	0.9313	0.9752	1	0.9243	0.9344	0.9638	0.9579	0.9365	0.949	0.9501	0.9474	0.9243	0.9453	0.9485	0.9502	0.9142	0.9647	0.939	0.9596	0.9603	0.9524	0.971	0.9073	0.9683	0.9117	0.9742	0.9757	0.9476	0.9307	0.97
SYTL1	1320	AP	1			0	1	0.916	0.1121	0.7967	0.7677	0.0753	0.9489	0.8833	0.9522	0.9377	0.832	0.9075	0.7434	0.9728	0.9239	0.941	0.548	0.8869	0.9711	0.8647	0.9116	0.6588	0.7132	0.7751	0.8594	0.7269	0.8797	0.8498	0.8624	0.843	0.8138	0.6474	0.7287	0.7494	0.7352	0.9555	0.9465	0.9522	0.7632	0.9104	0.8289	0.8678	0.8299
SYTL1	1321	AP	2.1			0	1	0.916	0.1121	0.2033	0.2323	0.9247	0.0511	0.1167	0.0478	0.0623	0.168	0.0925	0.2566	0.0272	0.0761	0.059	0.452	0.1131	0.0289	0.1353	0.0884	0.3412	0.2868	0.2249	0.1406	0.2731	0.1203	0.1502	0.1376	0.157	0.1862	0.3526	0.2713	0.2506	0.2648	0.0445	0.0535	0.0478	0.2368	0.0896	0.1711	0.1322	0.1701
SYTL1	1322	AA	6.1	5	6.2	0	1	0.2847	0.043	0.7865	0.8299	0.9452	0.9257	0.8519	0.9604	0.9131	0.9241	0.9159	0.9016	0.943	0.9222	0.9546	0.9302	0.863	1	0.9303	0.8993	0.9227	0.8519	0.883	0.876	0.8641	0.9069	0.8842	0.9033	0.8731	0.8805	0.9011	0.942	0.9159	0.9278	0.9227	0.8851	0.9463	0.8967	0.891	0.9136	0.8739	0.9469
MAP3K6	1323	ES	3	2	4	0	0.9582	0.8092	0.1317		0.8263		0.514	0.9324	0.7986	0.7352	0.5773	0.9116		0.888	0.7205	0.4806	0.7109	0.7659	0.5693	0.4734	0.6168	0.5433	0.6582	0.692	0.3882	0.9597	0.7811	0.5742	0.8771	0.6303	0.8583	0.6133	0.9632	0.8302	0.6352	0.5693	0.4932	0.7041	0.7407	0.7603		0.6111	0.6372
MAP3K6	1324	RI	1.2	1.1	1.3	0	0.94	0	0		1	1	1	1		1	1	1	1	1	1		1	1		1	1	1	1	1	1	1	1	1	1	1	1	1	1	1	1	1	1	1	1		1	1	1
FCN3	1325	ES	4	3	5	0	0.7909	0.5789	0.0815	0.9054	1		1	0.799	0.9442	0.9075	1	1	0.9364	1			0.8154	0.8804		1	0.8901	0.8422		0.9217	0.7204	0.9008	0.8804		0.7465	0.8622	1	1	0.7794		0.8136	0.8648	0.8548	0.7535		0.8713	1	0.8781	0.8946
CD164L2	1326	AT	3.4			0	0.8618	0.3443	0.0203	0	0		0	0			0	0		0	0	0	0	0		0	0	0			0	0	0			0	0	0	0	0	0	0	0	0	0		0	0	0
CD164L2	1327	AT	4.3			0	0.8618	0.3443	0.0203	1	1		1	1			1	1		1	1	1	1	1		1	1	1			1	1	1			1	1	1	1	1	1	1	1	1	1		1	1	1
CD164L2	1328	RI	4.2	4.1	4.3	0	0.9273	0.7391	0.2057	1	0.6003	0.3036	1	1		1	0.8621		0.5043	0.4442	0.4952	0.7969	0.6473	0.3907		0.7408	0.5215	0.7235	1	0.5667	0.7158	0.58	0.4921	1		0.7999	0.6568	0.4983	0.7618	0.5667	1	0.4059	0.4315	0.4858	1		0.3676	0.8208	0.7341
WASF2	1330	ES	8	7	9	0	1	0.0379	0.0028	1	1	1	1	1	1	1	1	1	1	1	0.9975	1	1	1	1	1	0.9984	1	1	0.9964	1	1	1	1	1	1	0.9989	1	0.997	1	0.9937	1	0.9865	1	0.9944	0.9942	1	1	0.9955
AHDC1	1331	ES	00:03:04.100000	2	4.2	0	0.9218	0.9346	0.213	0.685	1		0.2218	0.9193	0.8853	1	0.426	1	0.4881		0.4321	0.7459	0.4699	0.8852	0.8611	0.9633	0.806	0.635	1	0.5735	0.8538	0.3177	0.6036	0.6628		1	0.3831	0.7429	0.3147	0.5636	0.6682		1	0.3999	0.8109	0.431	0.617	0.4481	0.2757
FGR	1332	AP	3			0	0.8018	0.7246	0.1129	0.3413	0.2872		0.2872	0.235	0.2774	0.3068	0.1388		0.2744		0.2771	0.4623	0.2174	0.182		0.3718		0.191	0.199			0.298	0.2236	0.1409		0.2349	0.2195	0.0955	0.4661	0	0	0.2485		0.2875		0.2088		0.1088	0.2585
FGR	1333	AP	5.1			0	0.8018	0.367	0.062	0.0766	0		0	0	0	0	0		0.1056		0.1865	0	0.1756	0		0.1669		0	0			0.1395	0	0		0	0.0591	0.0857	0	0.367	0	0		0		0.0469		0	0
FGR	1334	AP	1			0	0.8018	0.8877	0.144	0.5822	0.7128		0.7128	0.6288	0.7226	0.6932	0.8612		0.6201		0.3223	0.5377	0.6069	0.6774		0.4613		0.7107	0.4937			0.5425	0.7073	0.7866		0.7651	0.6536	0.6221	0.5339	0.3171	1	0.7515		0.4904		0.583		0.7948	0.6916
FGR	1335	AP	2			0	0.8018	0.5225	0.0878	0	0		0	0.1362	0	0	0		0		0.214	0	0	0.1406		0		0.0983	0.3074			0.02	0.0691	0.0725		0	0.0678	0.1967	0	0.3159	0	0		0.2221		0.1613		0.0965	0.0499
FGR	1336	ES	7.2:8	7.1	9	0	0.9909	0.0879	0.0069	1	1	1	1	1	1	1	1	1	1	1	1	1	1	1	1	1	1	1	1	1	1	1	1	1	1	1	1	1	1	1	1	1	1	1	1	1	1	1	1
IFI6	1337	AD	2.3	2.2	3	0	0.9564	0.4975	0.0634	0.3467	0.2333		0.1594	0.1323	0.1621	0.1408	0.1496	0.2922	0.2277	0.0895	0.2771	0.2277	0.1076	0.1503	0.4363	0.2434	0.2277	0.2461	0.2906	0.22	0.2277	0.2166	0.211	0.0766	0.1388	0.1356	0.1973	0.1068	0.2384	0.1333	0.2009	0.1503	0.2981	0.2453	0.1549	0.1554	0.1578	0.219	0.1374
IFI6	1338	AD	2.2:2.3	2.1	3	0	0.9982	0.196	0.0226	0.0565	0.0738		0.0378	0.0332	0.0422	0.0293	0.0473	0.0772	0.0808	0.0228	0.0824	0.0741	0.052	0.0499	0.1398	0.0479	0.0427	0.0715	0.0652	0.0732	0.0609	0.0514	0.069	0.0183	0.0361	0.0459	0.0437	0.0318	0.0604	0.0264	0.0497	0.0431	0.0538	0.0493	0.055	0.0465	0.054	0.0537	0.0322
IFI6	1339	AD	2.2	2.1	3	0	0.9982	0.3439	0.0411	0.1148	0.2299		0.206	0.2073	0.2288	0.1702	0.2375	0.1831	0.2509	0.2225	0.2286	0.2193	0.3287	0.2597	0.1789	0.1452	0.1565	0.2119	0.1712	0.2304	0.1975	0.1881	0.2312	0.2188	0.2138	0.2592	0.1981	0.2134	0.1965	0.1852	0.1937	0.2229	0.1354	0.159	0.263	0.2171	0.2552	0.1801	0.1927
FAM76A	1340	AT	10			0	1	0.3157	0.0553	0.9868	1	0.9796	0.9477	0.9183	0.9851	0.9306	0.9569	0.9362	0.885	0.9354	0.892	0.9325	0.8961	0.9419	0.8028	0.9547	0.9904	0.8656	0.9026	0.8787	0.8573	0.9469	0.9789	0.9049	0.9714	0.9361	0.8708	0.9048	0.8636	0.9306	0.8822	1	0.9702	0.9625	0.8245	0.9643	0.9228	0.8911	0.8988
FAM76A	1341	AT	9.2			0	1	0.3157	0.0553	0.0132	0	0.0204	0.0523	0.0817	0.0149	0.0694	0.0431	0.0638	0.115	0.0646	0.108	0.0675	0.1039	0.0581	0.1972	0.0453	0.0096	0.1344	0.0974	0.1213	0.1427	0.0531	0.0211	0.0951	0.0286	0.0639	0.1292	0.0952	0.1364	0.0694	0.1178	0	0.0298	0.0375	0.1755	0.0357	0.0772	0.1089	0.1012
FAM76A	1342	ES	7	6	8	0	0.9982	0.4986	0.0914	0.8561	0.6372	0.9633	0.8324	0.8891	0.8268	0.7913	0.7167	0.7741	0.7681	0.6194	0.8513	0.8795	0.6981	0.8477	1	0.8155	0.8004	1	0.8371	0.9196	0.9278	0.657	1	0.7444	0.7243	0.6533	0.8509	0.9082	0.8394	0.8222	0.6953	0.7444	0.7595	0.5873	0.761	0.7784	0.7472	0.8142	0.8457
FAM76A	1343	ES	5	4	6	0	1	0.1461	0.0152	1	1	1	1	1	1	0.9804	1	1	1	1	1	1	1	1	1	1	1	1	1	1	1	1	1	1	0.9522	1	0.9878	1	1	1	0.9811	1	1	1	1	1	1	0.9779	1
FAM76A	1344	ES	3	2	4	0	0.9945	0.8864	0.1529	0.5369	0.3562	0.4868	0.303	0.385	0.2913	0.2435	0.5323	0.1689	0.4157	0.2833	0.253	0.2402	0.637	0.3647	0.1365	0.4157	0.3746	0.5297	0.4157	0.4868	0.4157	0.4868	0.3874	0.4369	0.2564	0.1668	0.4078	0.4797	0.3562	0.6459	0.3386	0.5253	0.3669	0.2402	0.4648	0.2991	0.3971	0.2864	0.3562
PPP1R8	1345	ES	4	3	5	0	1	0.0518	0.0077	1	0.9949	1	1	0.9902	1	0.9879	0.997	0.9903	1	1	0.9822	0.9963	0.993	0.9875	0.9885	1	1	1	0.9875	0.9897	1	1	0.9855	1	1	0.988	0.9921	0.9918	0.9949	1	1	0.9946	1	0.9965	0.9894	1	0.9902	1	0.9872
PPP1R8	1346	AD	1.3	1.2	2	0	0.8036	0.7934	0.1343	1	1		1	1	0.5656	0.8494	0.7962	1	0.8587		0.9011	0.7047	1	0.6983			1		0.8127	0.494	0.7962	1	0.6845		1	1	0.8943	1	0.8268	0.6845	0.8839	0.6613	1	0.5204	0.8088	0.8494	0.7867	1
PPP1R8	1347	AD	1.2:1.3	1.1	2	0	1	0.4539	0.0719	0.1061	0.1096	0.016	0.0876	0.1162	0.022	0.0612	0.0912	0.1025	0.091	0.1063	0.13	0.0695	0.1255	0.0849	0.0513	0.1221	0.1058	0.2392	0.1149	0.0952	0.0999	0.0813	0.1049	0.0857	0.1686	0.1036	0.1561	0.1716	0.1464	0.1184	0.1658	0.0612	0.1525	0.0682	0.2621	0.0787	0.1239	0.1106	0.0586
PPP1R8	1348	AD	1.2	1.1	2	0	0.9945	0.3348	0.0541	0	0	0	0	0	0.0894	0.0199	0.0505	0	0.0256	0	0.026	0.0967	0	0.0575	0.0467	0	0	0	0.0395	0.1178	0.0888	0	0.0741	0	0	0	0.0451	0	0.0246	0.08	0.0368	0.0642	0	0.108	0.0978	0.0251	0.0559	0	0.0322
THEMIS2	1349	RI	4.2	4.1	4.3	0	0.9982	0.1163	0.0168	0.9761	1		1	0.978	0.9731	1	1	1	0.9882	1	1	1	0.985	0.9884	0.9523	1	1	0.9627	1	0.9496	1	0.9949	0.9882	1	0.9699	0.9245	1	1	1	1	1	1	1	0.9369	1	0.9884	1	0.9677	0.9887
THEMIS2	1350	ES	4.1:4.2:4.3	3	5	0	1	0.2159	0.0342	1	0.9508	0.9267	0.9306	0.9323	0.9881	1	0.9838	1	0.9702	0.8796	0.9087	0.9518	0.9471	0.9892	0.8595	1	1	0.9458	0.9368	0.8923	1	0.9819	0.9711	1	1	0.9502	0.9348	0.9779	0.9802	1	1	0.9501	0.8977	0.9582	0.8874	0.9711	1	0.9696	0.9819
THEMIS2	1352	ES	3:4.1:4.2:4.3	2	5	0	1	0.4417	0.07	0.9789	0.9323	0.6464	0.778	0.8459	0.8845	0.913	0.8864	0.9102	0.9802	1	0.8937	0.8555	0.8667	0.9593	0.7663	0.864	0.9565	0.9053	0.9127	0.7959	0.8859	0.9345	0.9254	1	0.8914	0.9017	0.9174	0.9429	0.9798	0.9557	0.9429	0.883	0.8218	0.8677	0.9156	0.8545	0.9689	0.8989	0.9543
RPA2	1357	RI	1.3	1.2	1.4	0	0.9982	0.0952	0.0142	0	0.0146		0.0068	0.0091	0.01	0.004	0	0	0.0159	0	0.0057	0	0.023	0.0088	0	0.0068	0.0065	0.0323	0.0188	0.0088	0	0	0	0	0	0.0028	0.0366	0.0406	0.026	0	0.0101	0	0.0035	0.0042	0.0769	0.0044	0	0.0072	0
RPA2	1359	AD	1.2	1.1	1.4	0	1	0.085	0.0111	0.9596	1	1	1	1	1	1	0.9834	1	1	1	0.9824	0.9747	1	1	1	1	1	0.97	1	1	1	1	1	0.979	1	0.9853	1	1	1	1	0.9934	0.9872	0.976	1	1	0.987	0.9846	0.9852	1
SMPDL3B	1360	AT	7.2			0	0.9909	0.5578	0.0975	0.227	0.2438	0.512	0.1032	0.1743	0.2453	0.2119	0.2034	0.3	0.3773	0.3338	0.355	0.1126	0.2941	0.3357	0.3961	0.3172	0.1547	0.3789	0.2402	0.4404	0.2178	0.2853	0.3847	0.2035	0.3719	0.2078	0.4784	0.5231	0.1956	0.3166	0.21	0.3142	0.2786	0.1232	0.3	0.1928	0.2927	0.2959	0.196
SMPDL3B	1361	AT	8			0	0.9909	0.5578	0.0975	0.773	0.7562	0.488	0.8968	0.8257	0.7547	0.7882	0.7966	0.7	0.6227	0.6662	0.645	0.8874	0.7059	0.6643	0.6039	0.6828	0.8453	0.6211	0.7598	0.5596	0.7822	0.7147	0.6153	0.7965	0.6281	0.7922	0.5216	0.4769	0.8044	0.6834	0.79	0.6858	0.7214	0.8768	0.7	0.8072	0.7073	0.7041	0.804
SMPDL3B	1362	ES	4	3.2	5	0	0.9673	0.0391	0.0033	1	1	1	1	1	1	1	1	1	1	1	1	1	1	1	1	1	1	1	1	1	1	1	1	1			1	1	1	1	1	1	1	1	1	1	1	1	1
EYA3	1366	AT	18			0	1	0.1269	0.0178	0	0.0179	0	0.0192	0.0116	0	0	0.007	0	0.0196	0	0.0196	0	0.0127	0.0086	0	0	0.0033	0.0266	0.0167	0	0.0211	0.0272	0.0193	0.0212	0	0	0.0337	0.0436	0.0126	0.0252	0.0251	0	0	0.0194	0.0308	0.042	0.0403	0.0197	0.0259
EYA3	1367	AT	19			0	1	0.1269	0.0178	1	0.9821	1	0.9808	0.9884	1	1	0.993	1	0.9804	1	0.9804	1	0.9873	0.9914	1	1	0.9967	0.9734	0.9833	1	0.9789	0.9728	0.9807	0.9788	1	1	0.9663	0.9564	0.9874	0.9748	0.9749	1	1	0.9806	0.9692	0.958	0.9597	0.9803	0.9741
EYA3	1368	AA	10.1	9	10.2	0	0.94	0.22	0.0147		1		1	1	1	1	1	0.9427	1		1	1	1	1		1	1	1	1	1	1	1	1	1	1	1	0.9805	1	1	0.957	1	1	1	1	0.8855	1	1	1	1
EYA3	1369	ES	7	6	8	0	0.9855	0.8824	0.1221	0.1284	0.4118	0.2857	0.5833	0.3027	0.4094	0.3056	0.3605	0.4094	0.3902	0.2222	0.5411	0.3066	0.5506	0.3304	0.3333	0.4595	0.4419	0.5113	0.3802	0.3478	0.5614	0.6226	0.5556	0.3791	0.4643	0.6388	0.4017	0.4693	0.4019	0.5333	0.4165	0.1176	0.3293	0.3478	0.5836	0.3784	0.3972	0.476	0.8936
EYA3	1370	ES	06:07:00	5	8	0	0.9818	0.0692	0.0063	1	1	1	1	1	1	1	1	1	1	1	1	1	1	1		1	1	1	1	0.9453	1	1	1	1	1	1	1	1	1	1	0.9761	1	1	1	1	1	1	1	1
EYA3	1371	ES	6	5	8	0	0.9873	0.0888	0.0051	1	1	1	1	1	1	1	1	1	1	1	1	1	1	1	1	1	1	1	1	0.976	1	1	1	1	1	1	1	1	1	1	0.9892	1	1	1	1	1	1	1	1
EYA3	1372	ES	4	3	5	0	0.9909	0.252	0.0461	1	0.9564	0.7892	1	0.9718	1	1	1	1	0.9659	1	0.9725	0.9431	0.9381	0.9629	1	1	0.9384	1	0.7624	1	0.9104	1	0.917	1	0.9145	0.9497	1	0.9471	0.9115	0.9248	0.9172	1	1	1	1	0.9537	0.9688	0.8073	1
EYA3	1374	ES	3	2	4	0	0.9691	0.0732	0.0032	1	1	1	1	1	1	1	1	1	1	1	1	1	1	1	1	1	1	1	1	1	1	1	1	1	1	1	1	1	1	1	1	1	1	1	1	1	1	1	1
PTAFR	1375	AP	1			0	0.7855	1	0.2237		0.9525		0.7976	0.9683	0.9063	0.9831	0.9845	0.9611	0.7818	1	0.2349	0.9555		0.9508		0.9569	1	0.9488			1	0.7818		1	1		0.9021		0.936	0.8958	0.9541	0.8515	0.9024		0.9571	0.9617	0.8748	0.9379
PTAFR	1376	AP	2.1			0	0.7855	1	0.2237		0.0475		0.2024	0.0317	0.0937	0.0169	0.0155	0.0389	0.2182	0	0.7651	0.0445		0.0492		0.0431	0	0.0512			0	0.2182		0	0		0.0979		0.064	0.1042	0.0459	0.1485	0.0976		0.0429	0.0383	0.1252	0.0621
ATPIF1	1378	AT	3			0	1	0.078	0.0099	0.0077	0.0185	0.0142	0.0109	0.0188	0.0064	0.012	0.0077	0.0056	0.0347	0.0028	0.0087	0.0104	0.023	0.0084	0.0038	0.0057	0.0085	0.0336	0.0188	0.0092	0.0056	0.0309	0.009	0.0138	0.0132	0.0147	0.0079	0.0196	0.0222	0.0082	0.0122	0.0031	0.0083	0.0049	0.0141	0.0043	0.0084	0.0143	0.0181
ATPIF1	1379	AT	2.4			0	1	0.078	0.0099	0.9923	0.9815	0.9858	0.9891	0.9812	0.9936	0.988	0.9923	0.9944	0.9653	0.9972	0.9913	0.9896	0.977	0.9916	0.9962	0.9943	0.9915	0.9664	0.9812	0.9908	0.9944	0.9691	0.991	0.9862	0.9868	0.9853	0.9921	0.9804	0.9778	0.9918	0.9878	0.9969	0.9917	0.9951	0.9859	0.9957	0.9916	0.9857	0.9819
ATPIF1	1380	RI	2.2	2.1	2.3	0	1	0.5297	0.0972	0.8741	0.8569	0.8846	0.9711	0.8873	0.674	0.8421	0.8131	0.8757	0.9319	0.7252	0.9917	1	0.8989	0.874	0.886	0.9082	1	1	0.9909	1	0.8003	1	1	0.8809	0.9139	0.8482	0.8809	1	0.9854	0.9217	0.8915	0.6551	0.7779	0.67	1	0.8969	0.9762	0.9294	0.8359
ATPIF1	1381	RI	2.2:2.3	2.1	2.4	0	1	0.579	0.0898	0.0892	0.1487	0.2198	0.1821	0.2191	0.1203	0.1575	0.1494	0.0971	0.1524	0.0647	0.2879	0.1096	0.1978	0.1114	0.3277	0.2634	0.1217	0.1148	0.4017	0.1348	0.1759	0.2384	0.0726	0.1133	0.059	0.2044	0.1403	0.206	0.2286	0.1028	0.2653	0.0591	0.1289	0.0617	0.0834	0.1321	0.0616	0.0918	0.1577
ATPIF1	1382	AA	2.3	2.1	2.4	0	1	0.1248	0.021	0.0173	0.037	0.0431	0.0077	0.0361	0.0886	0.0409	0.0499	0.0185	0.0133	0.0335	0.0034	0	0.0304	0.0223	0.0554	0.0401	0	0	0.0067	0	0.0711	0	0	0.0226	0.0072	0.051	0.0258	0	0.0046	0.0123	0.0424	0.056	0.053	0.0547	0	0.0178	0.0017	0.0096	0.0444
MED18	1383	RI	3.2	3.1	3.3	0	1	0.0583	0.0093	1	1	1	0.982	1	0.9818	0.9926	0.9943	0.9749	1	1	1	1	0.9921	1	1	1	0.9918	0.9417	0.9874	0.9816	0.9904	0.9801	0.987	0.9933	1	0.99	0.9832	0.9903	0.9779	1	0.9931	0.9822	0.9882	1	0.9817	1	1	0.9834	1
PHACTR4	1384	AP	1			0	0.9873	0.7558	0.1456	0.5871	0.7173	0.2953	0.8566	0.8842	0.652	0.4459	0.4118	0.7993	0.6747	0.901	0.5852	0.8505	0.6914	0.6681	0.5966	0.9234	0.6058	0.2953	0.6454	0.4604	0.6143	0.4313	0.4916	0.9041	0.7299	0.4295	0.708	0.4544	0.635	0.5597	0.8214	0.6947	0.8258	0.7734	0.6307	0.4454	0.5322	0.4816	0.6759
PHACTR4	1385	AP	3			0	0.9873	0.7558	0.1456	0.4129	0.2827	0.7047	0.1434	0.1158	0.348	0.5541	0.5882	0.2007	0.3253	0.099	0.4148	0.1495	0.3086	0.3319	0.4034	0.0766	0.3942	0.7047	0.3546	0.5396	0.3857	0.5687	0.5084	0.0959	0.2701	0.5705	0.292	0.5456	0.365	0.4403	0.1786	0.3053	0.1742	0.2266	0.3693	0.5546	0.4678	0.5184	0.3241
RCC1	1386	AP	1			0	1	0.6799	0.143	0.8153	0.7341	0.9381	0.8058	0.6727	0.5834	0.6426	0.6026	0.6674	0.7734	0.3056	0.5321	0.8271	0.6859	0.7022	0.5996	0.468	0.4376	0.7429	0.8178	0.7155	0.5351	0.9014	0.5735	0.7651	0.7409	0.7798	0.7454	0.7559	0.6395	0.3242	0.5894	0.5761	0.3282	0.3312	0.727	0.6782	0.5823	0.7337	0.7885
RCC1	1387	AP	5			0	1	0.6799	0.143	0.1847	0.2659	0.0619	0.1942	0.3273	0.4166	0.3574	0.3974	0.3326	0.2266	0.6944	0.4679	0.1729	0.3141	0.2978	0.4004	0.532	0.5624	0.2571	0.1822	0.2845	0.4649	0.0986	0.4265	0.2349	0.2591	0.2202	0.2546	0.2441	0.3605	0.6758	0.4106	0.4239	0.6718	0.6688	0.273	0.3218	0.4177	0.2663	0.2115
RCC1	1388	ES	7	6	8	0	1	0.7166	0.1034	0.249	0.2191	0.3321	0.2343	0.2783	0.1302	0.1707	0.2117	0.2153	0.28	0.1539	0.2298	0.1323	0.1722	0.19	0.1867	0.129	0.1319	0.1893	0.1023	0.0676	0.1648	0.1317	0.2072	0.4237	0.2343	0.1244	0.1491	0.1627	0.1449	0.1408	0.0818	0.249	0.1585	0.2736	0.1368	0.1742	0.1084	0.212	0.2395
TAF12	1389	AD	1.2	1.1	2	0	1	0.3425	0.058	0.0068	0.079	0.057	0.0549	0.0214	0.0577	0.0414	0.0886	0.0442	0.0752	0.1076	0.1112	0.0713	0.2862	0.0533	0.0811	0.0883	0.1313	0.0866	0.0494	0.0943	0.101	0.1071	0.1442	0.0528	0.0689	0.0729	0.0625	0.1326	0.2106	0.1201	0.197	0.0531	0.0631	0.0823	0.0165	0.1228	0.0858	0.0698	0.0834
GMEB1	1390	AA	3.1	2.2	3.2	0	0.8909	0.754	0.1315	0.0973	0.5214	0.3763	0.5423	0.1935	0.6786	0.3816	0.3697	0.6935	0.4482		0.1773	0.6013	0.1586	0.3501		0.3265	0.4365	0.2009	0.1845	0.3345	0.4299	0.4118	0.5014	0.3155	0.2553	0.2824	0.2341	0.1815	0.339	0.4299	0.2819		0.4299	0.2248	0.2716	0.4299	0.2888	0.4986	0.3501
GMEB1	1391	AA	2.1	1	2.2	0	0.7891	0.6328	0.1149		0.8971			0.7771	0.6078	0.6932	0.9356		0.8917		0.7439		0.8288			0.7077	0.6978			0.6595	1	0.7722	0.6854	0.8598	0.8288	0.8766	0.8857		0.756	0.5476	0.8131		0.8532	0.9064		0.7077	0.6355	0.9393	0.7722
YTHDF2	1394	ES	2	1.3	3	0	1	0.0503	0.0091	1	1	0.9845	1	1	0.9652	1	0.9927	0.9887	1	1	0.9794	1	0.9898	1	1	1	1	0.9833	1	0.9915	1	1	1	1	1	0.9945	0.9871	1	1	1	0.9877	1	0.9838	0.9787	1	1	0.9911	1	1
YTHDF2	1395	RI	1.2	1.1	1.3	0	0.9764	0.0865	0.0085	1	1		1	1	1	0.9668	1	1	1	1	1	1	1	1	1	1	1	1	0.9533	1	1	1	1	1	1	1	1	1	1	1	1	1	1	1	1	1	1	1	1
EPB41	1396	AP	2			0	0.8618	0.5078	0.048		0			0.0486	0	0			0		0.0755		0	0.0732	0	0	0	0.198		0.0813		0	0.0746	0		0	0	0	0	0.131	0.0264		0	0		0.113	0	0
EPB41	1397	AP	3			0	0.8618	0.753	0.1385		0			0.0295	0	0.1233			0.1134		0.2744		0.5706	0.0443	0	0.129	0.1558	0.1199		0.1479		0.0657	0.0904	0.1233		0.2285	0.4129	0.5397	0.142	0.0794	0.2703		0.2602	0.2423		0.2054	0.1397	0.2347
EPB41	1398	AP	1			0	0.8618	0.753	0.14		1			0.9219	1	0.8767			0.8866		0.6501		0.4294	0.8825	1	0.871	0.8442	0.6821		0.7708		0.9343	0.8351	0.8767		0.7715	0.5871	0.4603	0.858	0.7897	0.7033		0.7398	0.7577		0.6815	0.8603	0.7653
EPB41	1399	AT	19.2			0	1	0.0615	0.0096	0	0.0124	0.0163	0	0	0	0.0143	0.019	0	0	0	0	0	0	0	0	0.0079	0	0	0	0.042	0.0091	0	0.007	0.0131	0	0.0122	0.0195	0.0091	0	0.0257	0.0106	0	0.0096	0	0.0174	0.0102	0.0093	0.016	0
EPB41	1400	AT	24			0	1	0.0615	0.0096	1	0.9876	0.9837	1	1	1	0.9857	0.981	1	1	1	1	1	1	1	1	0.9921	1	1	1	0.958	0.9909	1	0.993	0.9869	1	0.9878	0.9805	0.9909	1	0.9743	0.9894	1	0.9904	1	0.9826	0.9898	0.9907	0.984	1
EPB41	1401	ES	21	20	22	0	0.9982	0.1855	0.0217	1	0.9789	1	0.9621	1	0.9733	0.9755	0.9814	1	0.9873	1	0.9732	0.836	0.9891	0.9588	0.9769	1	0.967	0.9888	1	0.9814	0.9882	1	0.9814	1	1	1	0.9874	0.9887	0.9895	1	0.9866	1	0.9837	0.9639	1	0.9453	0.9809	1	0.9655
EPB41	1403	ES	20	19.1	21	0	0.9982	0.1978	0.0325	1	0.9773	0.8811	1	0.9347	0.9194	1	0.95	0.9542	0.9827	1	0.9673	1	0.9633	0.9346	1	1	0.9622	0.9665	0.967	0.9301	0.9202	0.9405	0.9591	0.9844	1	0.9361	0.9613	1	0.961	0.9471	0.9268	0.8671	0.9783	0.9534	1	0.9734	0.9737	1	1
EPB41	1409	ES	16	15	18	0	0.8145	1	0.164				0.2703	0.2878		0.3365	0.4013		0		0.3454		0.1387	0.0948	0.4808	0.3031	0.2201	0.2608	0.241	0.5319	0.251		0.302	0.2268		0.3586	0.2875	0.4099	0.1371	0	0.2881		0.0983	0.5695		0.2477	0.6951		0.6236
EPB41	1411	ES	16:18:00	15	19.1	0	0.88	1	0.2751	0.1071	0.3859		0.2309	0.3348		0.5657	0.3374		0		0.3739	0.3485	0.2245	0.1788	0.53	0.5631	0.6708	0.2633	0.8631	0.8316	0.5214	0	0.3619	0.3534		0.7519	0.8329	0.246	0.3194		0.6342		0.2667	0.4649	0.7846	0.2677	1	0.1802	0.4032
EPB41	1412	ES	18	15	19.1	0	0.9382	1	0.2355	0.2362	0.61	0.6801	0.4563	0.5624	0.6643	0.7201	0.461	0.748	0.4482		0.5221	0.3765	0.639	0.6907	0.5576	0.7522	0.8805	0.5	0.955	0.8204	0.7757	0.3747	0.5738	0.6667		0.8516	0.9265	0.3486	0.7549	0.8448	0.8222	0.8558	0.7823	0.401		0.5227		0.2277	0.2954
EPB41	1414	ES	7	6	8	0	0.9836	0.3049	0.0348	1	1	1	1	0.9354	1	1	0.9686	1	1	0.8236	1	1	0.9509	0.9661	1	1	0.9908	1	1	1	1	1	0.9757	0.9661		0.9804	0.9695	0.9581	0.946	1	0.9763	1	0.9504	1	1	1	0.9555	1	1
EPB41	1415	ES	5	4.2	6	0	0.8255	0.1158	0.013		0		0	0		0	0	0	0		0		0	0	0	0	0	0	0.0323	0.0794	0	0	0	0		0	0	0	0		0		0			0	0	0.0361	0
SRSF4	1421	ES	9	8	10	1	0.7891	0.0646	0.0123		0.9509		0.9683	0.9724	0.9676	0.9478	0.9696		0.9512	0.9657	0.9787	0.9487	0.9607	0.9433		0.9789	0.9622	0.966	0.9599	0.9768			0.9802		0.9526	0.9643	0.9737	0.9736	0.9751	0.9615	0.9308	0.957	0.9754	0.9658	0.968	0.9677	0.9646		0.967
SRSF4	1422	ES	08:09:00	7	10	0	1	0.011	0.0011	1	1	1	1	1	1	1	1	1	1	1	1	1	1	1	1	1	1	1	1	1	1	1	1	1	1	1	1	1	1	1	1	1	1	1	1	1	1	1	1
SRSF4	1424	ES	6	5	7	0	1	0.4538	0.0611	0.1084	0.048	0.0271	0.0355	0.0172	0.0154	0.0391	0.0619	0.0166	0.0826	0	0.0343	0.0389	0.0984	0.0279	0.0062	0.0096	0.0231	0.202	0.1046	0.0864	0.0794	0.1183	0.052	0.0354	0.0353	0.0455	0.1141	0.1483	0.063	0.0369	0.0643	0.0261	0.0167	0.0244	0.3652	0.0433	0.0552	0.0459	0.1312
SRSF4	1425	ES	02:03:04	1	5	0	1	0.7343	0.1159	0.2967	0.2535	0.4497	0.0502	0.1664	0.0175	0.1396	0.3392	0.1602	0.3791	0.0121	0.1653	0.0637	0.2202	0.2123	0.1276	0.1734	0.1304	0.3478	0.2757	0.3876	0.2485	0.2221	0.1715	0.2028	0.2127	0.0744	0.2847	0.322	0.3474	0.1282	0.0563	0.2015	0.0453	0.1428	0.5089	0.2239	0.3361	0.2056	0.3419
MECR	1426	AA	2.1	1	2.2	0	1	0.539	0.091	0.2958	0.2662	0.4994	0.3834	0.2058	0.2039	0.3147	0.3934	0.3619	0.3631	0.3143	0.2605	0.3431	0.2209	0.2958	0.433	0.1401	0.3557	0.5122	0.2188	0.2659	0.2958	0.4294	0.3225	0.2797	0.3244	0.2593	0.3709	0.4033	0.2013	0.1936	0.3334	0.3956	0.1919	0.1615	0.4092	0.3204	0.1819	0.2952	0.3016
PTPRU	1427	AA	31.1	30	31.2	0	0.9564	0.1178	0.0135	1	1		1	1	1	1	1	1	0.9037	1	1	1	1	1	1	1	0.9858	0.9864	1	1	1	1	0.9761	0.9966	1	0.9927	0.9938	1	1	1	0.9962	1	0.9909	0.9948	1	1	1	0.9795	0.9894
PTPRU	1428	AD	23.2	23.1	24	0	0.9109	1	0.1044		0.6949		0.5909	0.8913	0.68	0.74	0.6492	0.5605		0.6255	0.5533		0.5268	0.4253	0.8644	0.662	0.6324	0.5594	0.5774	0.5422	0.4767	0.6193	0.5913	0.657	0.82	0.5694	0.5821	0.5774	0.713	0.5061	0.6233	0.6255	0.5067	0.6758	0.8909	0.7183	0.5324	0.632	0.6086
PTPRU	1430	ES	21	19	22	0	0.8418	0.0524	0.0042		0	0	0	0	0	0	0			0	0		0	0	0	0	0	0.014	0	0		0	0	0	0	0	0	0	0	0	0	0	0	0		0	0	0	0
PTPRU	1431	ES	20	19	22	0	0.8418	0.0767	0.004		0	0	0	0	0	0	0			0	0		0	0	0	0	0	0	0	0		0	0	0	0	0	0	0	0	0	0	0	0	0		0	0	0	0
PTPRU	1432	ES	15	14	16	0	0.8455	0.1706	0.0136	0	0	0	0	0	0	0	0.0098			0	0.0054		0	0	0	0	0	0	0	0		0.0748	0.0085	0	0	0.0067	0	0	0	0	0	0	0.0126	0		0	0	0	0
SDC3	1436	RI	2.2	2.1	2.3	0	0.9873	0.5272	0.0823	0.1217	0.076	0.3726	0.0827	0.102	0.0028	0.22	0.0426	0.0162	0.1174	0.0494	0.0538	0.0319	0.2307	0.088	0.0314	0.0433	0.1205	0.0793	0.229	0.3381	0.0426	0.1108	0.0376	0.1255	0.117	0.0524	0.1522	0.214	0.1869	0.1482	0.1533	0.0194	0.0227	0.0302	0.3779	0.0656	0.0818	0.0323	0.0709
PUM1	1443	AD	18.2	18.1	19	0	0.9964	0.4667	0.0675	0.4014	0.5685	0.545	0.3732	0.5284	0.4889	0.3128	0.3992	0.5136	0.4398	0.3568	0.4726	0.332	0.4561	0.443	0.4318	0.4141	0.4617	0.5286	0.5297	0.4809	0.3715	0.4655	0.5687	0.4818	0.5587	0.4958	0.4176	0.4315	0.5492	0.4005	0.374	0.5748	0.4014	0.4057	0.3301	0.5485	0.5039	0.5451	0.5268
PUM1	1444	ES	15	14.2	16	1	0.7964	0.1576	0.0261		0.9142	0.8602	0.9172	0.8882		0.9256	0.8471	0.95	0.9125				0.9057	0.9467	0.9164	0.9535	0.9485	0.9245	0.965	0.9277		0.9199	0.939	0.9507	0.9147	0.959	0.9277		0.9474	0.9015	0.914	0.8995	0.9244	0.9212		0.914	0.9034
PUM1	1445	AA	14.1	13	14.2	0	0.9982	0.4037	0.0561	0.5963	0.791	0.804	0.8663	0.7218	0.7756	0.8436	0.8525	0.8918	0.8097	0.7834	0.907	0.846	0.8209	0.7614	0.8022	0.7727	0.8005	0.8461	0.8556	0.7267	0.8995	0.8055	0.9017	0.7558	0.8736	0.8115	0.8083	0.8206	0.8326	0.8378	0.7792	0.8097	0.8509	0.7912	0.733	0.8466	0.7726	0.8264	0.7929
PUM1	1446	ES	13	12	14.1	0	1	0.0428	0.0068	1	1	1	1	1	1	1	1	1	1	1	1	1	0.9909	1	1	1	1	0.9656	1	1	1	1	1	1	1	1	1	1	1	1	1	1	1	1	1	1	1	1	1
PUM1	1447	AA	10.1	9	10.2	0	0.9673	0.7248	0.0998		0.7439	0.3562	0.3562	0.4133	0.3923	0.3997	0.5147	0.4536	0.4153		0.4536	0.2792	0.452	0.4642	0.492	0.4997	0.3491	0.3813	0.6174	0.492	0.3262	0.2933	0.492	0.4454	0.3186	0.424	0.3346	0.4608	0.4089	0.3675	0.3789	0.2604	0.2052	0.5848	0.2789	0.4682	0.4466	0.5389	0.4089
PUM1	1448	ES	06:07:08	5	9	0	1	0.0448	0.0042	1	1	1	1	1	1	1	0.9906	1	1	1	0.9789	1	1	1	1	1	1	1	1	1	1	1	1	1	1	1	1	1	1	1	0.9956	1	1	1	1	1	0.9777	1	1
PUM1	1449	ES	5:6:7:8	4	9	0	1	0.1336	0.0186	1	0.9668	0.9867	0.9576	0.9397	0.9887	0.9852	0.9816	1	1	1	0.9189	1	0.992	0.9853	0.9327	1	0.9907	1	1	0.9913	0.9824	0.9809	1	0.9949	0.9638	0.9937	0.9615	0.9681	0.9557	1	0.9454	1	0.9714	0.9278	0.9474	0.9367	0.9464	1	0.982
PUM1	1450	ES	07:08:00	4	9	0	0.8691	0.785	0.1799		0.6987	0.8424	0.215	0.6018	0.796	0.8845	0.7745		1				0.8376	0.6473	0.5265	1	0.8486	1		0.7001	0.7344	0.6433	1	0.9382	0.6753		0.7052	0.6822	0.4827	1	0.6489	1	0.635	0.3224	0.7119	0.5719	0.6789	1	0.9175
PUM1	1452	ES	05:06:00	4	7	0	1	0.2435	0.0296	1	0.9355	0.9356	0.9896	0.9261	0.962	0.9142	0.9435	0.9796	0.9367	1	1	0.9728	0.9647	0.9759	0.9302	0.9631	0.9548	0.901	1	0.9816	0.9552	0.9691	0.9799	0.9354	0.9377	0.9932	0.9242	0.9378	0.9647	0.9786	0.9135	0.923	0.9584	0.9732	0.902	0.9277	0.9057	0.967	0.8484
PUM1	1453	ES	3	2.2	4	0	0.9818	0.2565	0.0323		0.0105	0.0279	0	0.0239	0.0166	0.0813	0.0081	0.0177	0.026	0	0.0544	0	0.048	0.0294	0	0.03	0.0355	0.0483	0.0149	0	0.01	0.0401	0.2406	0.0054	0.0497	0.0544	0.024	0.0201	0.0142	0.1257	0.059	0.0457	0.0194	0	0	0.0445	0.031	0.0116	0.0255
PUM1	1455	AD	2.2	2.1	4	0	0.9982	0.07	0.0099	1	1	1	1	1	0.9678	1	1	1	1	1	1	1	1	0.9912	1	0.9925	0.9911	1	1	1	0.973	1	0.9687	1	0.9884	1	1	1	1	0.9686	1	1	1	1	1	1	1	1	0.9746
PUM1	1456	AD	1.2	1.1	2.1	0	0.9945	0.264	0.0225	1	0.982	1	0.9796	1	1	1	1	0.9418	0.9818	1	1		0.9822	0.9868	0.891	0.9779	0.9943	0.9469	1	0.9418	1	1	1	0.9754	0.9818	0.9687	0.9879	0.96	0.9846	0.9608	0.98	1	1	1	1	1	0.9723	0.9686	1
SNRNP40	1457	AP	7.1			0	1	0.1238	0.0178	0.0097	0.0153	0.0874	0.0108	0.0074	0.0041	0.0108	0.0175	0	0.0316	0	0.0141	0.0018	0.0626	0.0054	0.0132	0.0065	0.0087	0.1146	0.0225	0.0187	0.024	0.0257	0.003	0.0174	0.0012	0.0115	0.0871	0.0467	0.0235	0.0143	0.0143	0.0076	0.0035	0.0043	0.0604	0.0133	0.0204	0.013	0.0393
SNRNP40	1458	AP	1			0	1	0.1238	0.0178	0.9903	0.9847	0.9126	0.9892	0.9926	0.9959	0.9892	0.9825	1	0.9684	1	0.9859	0.9982	0.9374	0.9946	0.9868	0.9935	0.9913	0.8854	0.9775	0.9813	0.976	0.9743	0.997	0.9826	0.9987	0.9885	0.9129	0.9533	0.9765	0.9857	0.9857	0.9924	0.9965	0.9957	0.9396	0.9867	0.9796	0.987	0.9607
SNRNP40	1459	ES	10	9	11	0	1	0.2816	0.0405	0.0515	0.1278	0.0927	0.1049	0.0844	0.0666	0.0701	0.1009	0.1258	0.112	0.055	0.098	0.0606	0.1387	0.1077	0.069	0.0907	0.0702	0.1134	0.13	0.0707	0.0964	0.1429	0.1119	0.0994	0.0518	0.0769	0.1735	0.0952	0.1866	0.2796	0.1457	0.1014	0.0836	0.108	0.1889	0.1619	0.1233	0.1104	0.1518
ZCCHC17	1460	AD	7.2	7.1	8	0	1	0.175	0.01	0	0.0185	0.0077	0	0.0032	0.0036	0	0	0.0058	0.0114	0	0	0.0033	0	0	0	0	0.0109	0	0	0	0	0	0.0053	0	0.0094	0.0035	0.0105	0.0119	0	0.0116	0	0	0	0	0.0107	0.0095	0	0.0063	0.0142
ZCCHC17	1461	ES	3	2	4	0	1	0.3668	0.0571	0.0926	0.2136	0.2342	0.0708	0.1361	0.1232	0.1361	0.1975	0.102	0.1006	0.1085	0.145	0.0865	0.147	0.1338	0.2035	0.1512	0.1088	0.1712	0.2212	0.0889	0.0709	0.1085	0.1545	0.2026	0.0922	0.1317	0.1368	0.1155	0.248	0.078	0.0939	0.1114	0.0303	0.1841	0.089	0.0911	0.1207	0.1142	0.1431
ZCCHC17	1463	ES	02:03:00	1.1	4	0	0.9491	0.7851	0.1526	0.8257	0.9282	1	0.7811	0.7974	0.8345	0.8507	0.8828	0.6399	0.9017	0.8227	0.8587	0.6088	0.7246	0.6779	0.6373	0.7379	0.7653	0.7073	0.9371	0.9145	0.5957	0.5966	0.8942	0.9123	0.7509	0.9488	0.8137	0.8633	0.868	0.5041	0.4202	0.6486	0.5667	1	0.827	0.7547	0.8969	0.9246	0.9254
ZCCHC17	1464	ES	1.2:2	1.1	4	0	0.9327	0.945	0.1677		0.8353	1	0.7712	0.6486	0.6909	0.724	0.7577	0.8219	0.8659		0.7318	0.6164	0.5108	0.5401	0.5364	0.5272	0.6398	0.6536		0.9102	0.5066	0.5927	0.7815	0.688	0.6066	0.8933	0.6939	0.7705	0.6453	0.5852	0.6077	0.6465	0.8514	1		0.735	0.4457	0.8707
ZCCHC17	1465	ES	2	1.1	4	0	1	0.1569	0.0232	0.984	0.984	1	0.977	0.969	0.9804	0.9785	0.9783	0.9614	0.9893	0.9785	0.9775	0.9616	0.9425	0.9399	0.9358	0.9528	0.9702	0.938	0.9852	0.9924	0.9617	0.9498	0.9821	0.9823	0.9666	0.9934	0.9688	0.9834	0.9624	0.9419	0.9243	0.944	0.9813	1	0.9851	0.976	0.9825	0.9922	0.9889
ZCCHC17	1466	AD	1.2	1.1	2	0	1	0.3004	0.0427	0.0054	0.0836	0.0468	0.0909	0.0625	0.0476	0.0621	0.0762	0.1848	0.0774	0.0132	0.0705	0.0711	0.0657	0.0813	0.0833	0.0611	0.06	0.141	0.005	0.0887	0.0481	0.0811	0.0732	0.047	0.059	0.0619	0.0803	0.0648	0.0803	0.1007	0.1438	0.1058	0.1214	0.0761	0.0201	0.0758	0.0181	0.0609	0.0193
FABP3	1467	ES	3	2	4	0	0.9491	0.5609	0.0478	0.0061	0.0763	0.0183	0.0154	0	0	0.0952	0.0349	0.0189	0.0473		0.015	0.0158	0.0952	0.021	0.0251	0.1321	0.046	0	0.0649	0	0.0371	0.0086	0.0281	0.0119	0.0649	0.0744	0.0604	0.0165	0	0.0397	0.1755	0.0291	0.0158	0.0604		0.0226	0	0.0341	0.0214
SERINC2	1468	AP	1			0	0.9945	0.1492	0.0072	0	0		0	0	0	0	0.003	0	0	0	0	0	0	0	0	0	0	0.0027	0	0	0	0	0	0	0	0	0	0	0.003	0	0	0	0	0	0.0018	0	0	0	0
SERINC2	1469	AP	3			0	0.9945	0.3208	0.0412	0.9797	0.9752		0.9799	0.9778	0.9599	0.989	0.9573	0.9447	0.9573	0.9696	0.9648	0.9363	0.9868	0.9552	0.9467	0.9194	0.9343	0.9255	0.8988	0.9484	0.99	0.9424	0.9262	0.9495	0.9652	0.976	0.9665	0.9507	0.8847	0.9371	0.921	0.9503	0.9933	0.9835	0.9226	0.8975	0.9462	0.9359	0.958
SERINC2	1470	AP	2.1			0	0.9945	0.0537	0.0048	0	0		0	0	0	0	0	0	0	0	0	0	0	0	0	0	0	0	0	0	0	0	0	0	0	0	0	0	0	0.0129	0	0	0	0	0	0	0	0	0
SERINC2	1471	AP	4			0	0.9945	0.3208	0.0406	0.0203	0.0248		0.0201	0.0222	0.0401	0.011	0.0397	0.0553	0.0427	0.0304	0.0352	0.0637	0.0132	0.0448	0.0533	0.0806	0.0657	0.0718	0.1012	0.0516	0.01	0.0576	0.0738	0.0505	0.0348	0.024	0.0335	0.0493	0.1123	0.0499	0.079	0.0497	0.0067	0.0165	0.0756	0.1025	0.0538	0.0641	0.042
TINAGL1	1473	AT	4			0	1	0.0688	0.0088	0	0.0157	0.0032	0.004	0.0078	0.0023	0.0128	0.0064	0.004	0.0089	0.0004	0.0059	0	0.0139	0.0083	0	0.0072	0.0082	0.0103	0.0093	0.0156	0	0.0078	0.0054	0.0104	0.0037	0.0035	0.0079	0.0093	0.0055	0.016	0.0062	0.0009	0	0	0.0086	0.0019	0.0086	0.0043	0.0189
TINAGL1	1474	AT	12			0	1	0.0688	0.0088	1	0.9843	0.9968	0.996	0.9922	0.9977	0.9872	0.9936	0.9959	0.9911	0.9996	0.9941	1	0.9861	0.9917	1	0.9928	0.9918	0.9897	0.9907	0.9844	1	0.9922	0.9946	0.9896	0.9963	0.9965	0.9921	0.9907	0.9945	0.984	0.9938	0.9991	1	1	0.9914	0.9981	0.9914	0.9957	0.9811
TINAGL1	1476	RI	5.2	5.1	5.3	0	0.9945	0.4151	0.0447	0.0738	0.0921	0	0.0133	0.0811	0.0207	0.0488	0.0281	0.0445	0.0379	0.0077	0.0268	0.0435	0.0898	0.0404	0.0187	0.0763	0.0863	0.0586	0.0587	0.0832	0.0092	0.087	0.0097	0.0451	0.0379	0.0956	0.0631	0.0759	0.1242	0.0651	0.0333	0.032	0.0068	0.0182	0.0688	0.0123	0.1566	0.0336	0.0559
TINAGL1	1477	AA	5.1:5.2	3	5.3	0	0.8255	0.3937	0.0388	1	1			1	1	1	1	1	1	1				1		1	1	1	0.9565	1		1	1	1	1	1	1	1	1	1	1	1			1	1	1	1	1
TINAGL1	1478	ES	5.1	3	5.3	0	1	0.0836	0.0046	1	1	1	1	1	1	1	1	1	1	1	1	1	1	1	1	1	1	1	0.9982	1	1	1	1	1	1	1	1	1	1	1	1	1	1	1	1	1	1	1	1
TINAGL1	1479	ES	3	2	5.1	0	1	0.0728	0.0066	1	0.9921	1	0.979	0.9984	1	1	0.9958	0.9942	1	1	1	1	1	0.9921	1	0.9967	1	0.9986	0.9982	0.9954	0.9785	0.9913	0.9977	0.9936	0.9952	0.9894	1	1	0.9964	1	0.9867	1	1	1	0.9934	0.9989	1	0.9969	1
PEF1	1487	AT	3			0	1	0.0285	0.0049	0.0058	0.0161	0.0047	0.0012	0.0066	0.0017	0.0012	0.0039	0.0043	0.0072	0	0.0074	0.002	0.0235	0.0056	0.0033	0.0053	0.0035	0.0051	0.0167	0.005	0.001	0.0078	0.0033	0.0076	0.0019	0.0017	0.0158	0.009	0.0064	0.0054	0.0085	0.0027	0.0007	0.0004	0.0104	0.0033	0.0048	0.0064	0.0071
PEF1	1488	AT	6			0	1	0.0285	0.0049	0.9942	0.9839	0.9953	0.9988	0.9934	0.9983	0.9988	0.9961	0.9957	0.9928	1	0.9926	0.998	0.9765	0.9944	0.9967	0.9947	0.9965	0.9949	0.9833	0.995	0.999	0.9922	0.9967	0.9924	0.9981	0.9983	0.9842	0.991	0.9937	0.9946	0.9915	0.9973	0.9993	0.9996	0.9896	0.9967	0.9952	0.9936	0.9929
COL16A1	1490	AT	45.2			0	1	0.0621	0.0087	0	0.003	0.0621	0	0.0106	0.0124	0.0082	0.0091	0	0	0	0.0566	0	0.0325	0	0	0	0.0089	0.003	0	0	0.0147	0	0	0	0	0	0.0021	0.0013	0.0268	0.0164	0.0101	0.007	0.0024	0	0.0027	0.0015	0	0	0
COL16A1	1491	AT	75			0	1	0.0621	0.0087	1	0.997	0.9379	1	0.9894	0.9876	0.9918	0.9909	1	1	1	0.9434	1	0.9675	1	1	1	0.9911	0.997	1	1	0.9853	1	1	1	1	1	0.9979	0.9987	0.9732	0.9836	0.9899	0.993	0.9976	1	0.9973	0.9985	1	1	1
COL16A1	1492	ME	47|48	46	49	0	0.9691	0.0752	0.0059	1	1		1	1	1	1	1	1		1	1	1	1	1	1	1	1	1	1	1	1	1	1		1	1	1	1	1	1	0.9961	1	0.9977	0.9471	1	1	1	0.9974	1
COL16A1	1493	ES	44	43	45.1	0	0.9691	1	0.2238	0.3966	0.9178		0.6566	0.4079	0.9485	0.7244	0.3259	0.922	0.8554	0.7581		0.3687	0.4005	0.6635	0.7363	0.6707	0.5679	0.3091	0.8092	0.467	0.7667	0.6126	0.6777	0.697	0.381	0.8171	0.6193	0.8456	0.4172	0.5117	0.456	0.3707	0.5342	0.7514	0.1761	0.645	0.557	0.6875	0.6154
BAI2	1499	ES	33	32.2	34	0	0.8673	0.5744	0.1069		1		1	0.8691	1		0.9175	0.7353		1	0.7702	1	0.8853	0.962			0.8023	0.8005	0.6069			0.9532	0.8065	1	0.8224		0.8682	0.6151	0.8606	1	0.6865	1	0.9175		1	0.8963	0.6837	1	0.9175
PTP4A2	1518	ES	7	6	8	0	1	0.0763	0.0082	0.9741	0.9722	0.9737	0.9878	0.9805	0.9817	0.9783	0.9754	0.9866	0.9678	0.9624	0.9832	0.9683	0.9813	0.9729	0.9833	0.9901	0.9833	0.9775	0.9871	0.9877	0.983	0.9807	0.9826	0.9931	0.9745	0.967	0.9839	0.9815	0.9839	0.9741	0.9784	0.9899	0.9732	0.9681	0.9815	0.9708	0.9811	0.9887	0.9837
PTP4A2	1523	ES	06:07:00	3	8	0	1	0.0274	0.0043	0.9892	0.9891	0.99	0.9941	0.9844	0.9831	0.9934	0.9955	0.986	0.9767	0.9763	0.9902	0.9837	0.9918	0.9884	1	0.998	0.9965	0.9899	0.9927	0.9926	0.9946	0.9922	0.9934	0.995	0.9935	0.9941	0.9943	0.9905	0.9935	0.9979	0.9878	0.9972	0.9973	0.989	0.9954	0.9894	0.9928	0.9928	0.9967
PTP4A2	1527	ES	6	3	8	0	0.9782	0.6713	0.1094	0.7914	0.797	0.795	0.7698	0.6652	0.6165	0.8368	0.8936	0.5864	0.672	0.694	0.724	0.7384	0.7827	0.7827	1	0.884	0.8785	0.7814	0.7446	0.7222	0.8419	0.7937	0.8079	0.6686	0.8654	0.8979	0.8081	0.7465	0.7898	0.9438	0.7375	0.8517	0.938	0.8147	0.8627	0.8065	0.8026	0.7154	0.8823
PTP4A2	1530	ES	6	3	7	0	1	0.0119	0.0018	0.9953	0.9961	1	1	0.9976	1	1	1	1	0.9958	1	0.9988	1	1	0.9985	1	1	1	1	1	0.996	1	1	1	1	1	1	0.9995	1	0.9973	1	0.9988	0.9985	0.9986	0.9977	0.9976	1	0.9961	0.9984	1
PTP4A2	1531	ES	04:05:00	3	6	0	1	0.0074	0.001	0	0.0013	0	0	0.0014	0	0.0006	0	0	0.0074	0	0	0	0.0009	0.002	0	0	0.0014	0	0.0005	0	0	0.0017	0	0.0007	0	0.001	0	0	0.0024	0	0	0.0009	0.0004	0	0	0	0	0.001	0
PTP4A2	1532	ES	5	3	6	0	1	0.015	0.0018	0	0	0	0	0	0	0.0008	0	0	0	0	0	0	0	0.0035	0	0	0	0.0026	0.0007	0	0	0	0.0031	0.001	0	0	0.0014	0.0048	0	0	0.0009	0.0013	0.0006	0.0018	0	0	0.0016	0	0
PTP4A2	1535	ES	03:04:05	2	6	0	0.9855	0.0821	0.0107	0	0.0118	0	0	0.0116	0	0.007	0	0	0.0473	0	0	0	0.0103	0.0193	0	0	0.0127	0	0.0043	0	0	0.0176	0	0.0123	0	0.0033	0	0	0.0462	0	0	0.0097	0.0028	0	0	0	0	0.0119	0
PTP4A2	1536	ES	03:05:00	2	6	0	0.9873	0.2878	0.036	0	0	0	0	0	0	0.0087	0	0	0	0	0	0	0	0.0598	0	0	0	0.063	0.0054	0	0	0	0.0814	0.0382	0	0	0.0149	0.0537	0	0	0.0177	0.0277	0.0035	0.0455	0	0	0.0827	0	0
PTP4A2	1537	ES	3	2	6	0	1	0.5439	0.0276	0.942	0.9453	0.9464	0.9614	0.9365	0.9164	0.9581	0.9436	0.9487	0.9253	0.9257	0.9572	0.9211	0.9556	0.9552	0.9683	0.9517	0.946	0.9564	0.9452	0.9544	0.9622	0.9536	0.9594	0.9713	0.9601	0.8648	0.9393	0.9483	0.9728	0.936	0.9434	0.9493	0.9267	0.9676	0.9531	0.9552	0.9788	0.9553	0.9451
KHDRBS1	1542	ES	3	2	4	0	1	0.0776	0.013	0.9831	0.987	0.9738	0.972	0.9724	0.9787	0.9501	0.9563	0.9679	0.966	0.9783	0.9568	0.9729	0.956	0.9556	0.9631	0.969	0.9737	0.9717	0.9623	0.975	0.9814	0.9549	0.9732	0.9746	0.9675	0.9769	0.9683	0.9677	0.9753	0.9632	0.9658	0.9527	0.9464	0.9645	0.9862	0.9354	0.9902	0.9655	0.9622
TMEM39B	1543	AT	9.2			0	1	0.2672	0.0392	0.0873	0.096	0.1189	0.0911	0.1496	0.0589	0.1	0.1004	0.0785	0.1557	0.0416	0.1764	0.085	0.1617	0.0914	0.07	0.0837	0.065	0.1258	0.1529	0.1138	0.1055	0.1488	0.0959	0.1017	0.0869	0.0771	0.1438	0.1496	0.1408	0.2979	0.1103	0.0799	0.0634	0.0372	0.1439	0.1099	0.1302	0.1157	0.1455
TMEM39B	1545	AT	10			0	1	0.2672	0.0392	0.9127	0.904	0.8811	0.9089	0.8504	0.9411	0.9	0.8996	0.9215	0.8443	0.9584	0.8236	0.915	0.8383	0.9086	0.93	0.9163	0.935	0.8742	0.8471	0.8862	0.8945	0.8512	0.9041	0.8983	0.9131	0.9229	0.8562	0.8504	0.8592	0.7021	0.8897	0.9201	0.9366	0.9628	0.8561	0.8901	0.8698	0.8843	0.8545
TMEM39B	1546	ES	6	5	7.2	0	1	0.2735	0.0309	1	0.9722	1	1	0.9064	1	0.9704	0.9468	0.9203	0.9144	1	1	0.9526	0.9756	0.9328	1	0.9893	0.9821	0.9804	1	1	1	0.9781	0.9636	0.8955	0.9801	0.9425	0.9735	0.9809	0.9153	0.9294	0.9701	1	1	0.9631	0.8907	0.9786	0.8482	1	0.9522
TMEM39B	1549	ES	05:06:00	3	7.2	0	1	0.3172	0.0555	0.7896	0.886	1	0.8778	0.8561	0.9305	0.9322	0.9396	0.6963	0.8234	0.9646	0.953	0.8605	0.9487	0.9052	1	0.9873	0.9393	0.9146	0.9239	1	0.9189	0.8879	0.9776	0.833	0.8386	0.7785	0.9518	0.9198	0.928	0.9472	0.8836	0.9729	0.9206	0.8796	0.9368	0.8281	0.6898	0.9164	0.8781
TMEM39B	1552	ES	4	3	5	0	0.8055	0.3446	0.0484		0.0499		0.0552	0.0339	0	0.0849	0			0	0		0		0.0699	0.0981	0.0214	0.0456	0		0.0617	0.0552	0.0389	0.0362	0.042	0.1254	0.0325	0	0	0	0.1282		0			0.0456		0.1618	0.0499
KPNA6	1553	AP	1			0	0.9709	0.2521	0.0214	1	1		1	0.9905	1	1	1	0.955	0.9861		0.9815	1	0.9659	1	1	0.955	0.9804	0.975	1	1	0.9787	0.9277	0.9894	0.9836	1	1	0.99	0.9809	0.9892	0.9365	0.9952	1	0.9696	1	1	1	1	1	1
KPNA6	1554	AP	2			0	0.9709	0.2521	0.02	0	0		0	0.0095	0	0	0	0.045	0.0139		0.0185	0	0.0341	0	0	0.045	0.0196	0.025	0	0	0.0213	0.0723	0.0106	0.0164	0	0	0.01	0.0191	0.0108	0.0635	0.0048	0	0.0304	0	0	0	0	0	0
KPNA6	1555	AP	3			0	0.9709	0.1006	0.0088	0	0		0	0	0	0	0	0	0		0	0	0	0	0	0	0	0	0	0	0	0	0	0	0	0	0	0	0	0	0	0	0	0	0	0	0	0	0
KPNA6	1556	AA	9.1	8	9.2	0	0.9782	0.0695	0.0047	1	1	1	1	1	1	1	1	1	1	1	1	1	1	1	1	1	1	1	1	1	1	1	1	1	1	1	1	1	1	1	1	1	1	1	1	1	1	1	1
KPNA6	1557	AD	5.2	5.1	6	0	0.9764	0.1411	0.0248	1	0.9747	1	0.956	0.9849	0.9837	1	1	1	1	1	1	1	0.9775	1	1	1	0.9886	0.9729	1	1	1	1	1	0.9695	0.9246	1	0.9905	1	0.9798	1	0.9917		1	1	1	0.9393	0.87	0.9557	1
TXLNA	1558	AP	1			0	0.9964	0.6826	0.1018	0.896	0.6327	0.4392	0.5004	0.758	0.5478	0.6401	0.6127	0.6456	0.6634	0.7327	0.4204	0.758	0.5397	0.5185	0.3082	0.7137	0.7302	0.5532	0.5962	0.5436	0.5748	0.6736	0.6191	0.6669	0.3499	0.6495	0.6981	0.5012	0.5968	0.3597	0.5044	0.3583	0.7274	0.5269	0.6601	0.5979	0.7445	0.6541	0.4261
TXLNA	1559	AP	2.1			0	0.9964	0.6826	0.1018	0.104	0.3673	0.5608	0.4996	0.242	0.4522	0.3599	0.3873	0.3544	0.3366	0.2673	0.5796	0.242	0.4603	0.4815	0.6918	0.2863	0.2698	0.4468	0.4038	0.4564	0.4252	0.3264	0.3809	0.3331	0.6501	0.3505	0.3019	0.4988	0.4032	0.6403	0.4956	0.6417	0.2726	0.4731	0.3399	0.4021	0.2555	0.3459	0.5739
CCDC28B	1560	AT	3			0	1	0.3191	0.0537	0.0465	0.2362	0.1813	0.0238	0.0102	0.0146	0.0518	0.0542	0.0353	0.0963	0	0.0334	0.0034	0.0979	0.0465	0.0751	0.0857	0.0403	0.0313	0.1119	0.3191	0.0203	0.1086	0.0669	0.1103	0.0446	0.0792	0.1458	0.1077	0.0763	0.1736	0.0415	0.0161	0.0186	0.0508	0.1223	0.0287	0.0717	0.0462	0.1388
CCDC28B	1561	AT	6.3			0	1	0.3191	0.0537	0.9535	0.7638	0.8187	0.9762	0.9898	0.9854	0.9482	0.9458	0.9647	0.9037	1	0.9666	0.9966	0.9021	0.9535	0.9249	0.9143	0.9597	0.9687	0.8881	0.6809	0.9797	0.8914	0.9331	0.8897	0.9554	0.9208	0.8542	0.8923	0.9237	0.8264	0.9585	0.9839	0.9814	0.9492	0.8777	0.9713	0.9283	0.9538	0.8612
CCDC28B	1562	RI	6.2	6.1	6.3	0	0.9945	0.7943	0.1206	0.0441	0.443	0.0493	0.0669	0.1301	0.1278	0.106	0.1934	0.1215	0.3562	0.0334	0.151	0.094	0.4447	0.2756	0.2167	0.0647	0.1365	0.206	0.1581	0.2792	0.1303	0.2314	0.1557	0.272	0.098	0.1666	0.2652	0.2167	0.2349	0.0756	0.1311	0.0618	0.0878	0	0.3386	0.1537	0.1034	0.1024	0.2637
CCDC28B	1563	AA	5.1	4	5.2	0	0.9927	0.0816	0.0079	1	1	1	1	1	1	1	1	1	1	1	0.9803	1	1	1	1	1	1	1	1	1	1	0.9695	1	1	1	1	1	1	0.9776	1	0.9874	1	1	1	1	1	1	1	1
IQCC	1564	AD	1.2	1.1	2	0	0.9073	1	0.2029		0.6891		0.1062	0.4093	0.1476	0.1652	0.2727		0.5808		0.3566	0.4924	0.3715	0.384			0.2936	0.6038		0.2936	0.1773	0.4539	0.3566	0.217	0.2836	0.1815	0.42	0.5057	0.5604	0.2607	0.6233	0.0335	0.2936		0.7182	0.6891	0.5808	0.309	0.2936
TMEM234	1567	AT	5.9			0	0.9964	0.7012	0.1161	0.3209	0.3104	0.2351	0.5322	0.3682	0.1489	0.265	0.1975	0.1544	0.2057	0.1645	0.2006	0.3331	0.3209	0.2247		0.1645	0.3271	0.19	0.1987	0.1609	0.2444	0.3178	0.2631	0.1724	0.1056	0.3865	0.188	0.301	0.2277	0.3401	0.1947	0.5838	0.2175	0.2454	0.1907	0.1198	0.4069	0.3812	0.2958
TMEM234	1568	AT	7			0	0.9964	0.7012	0.1161	0.6791	0.6896	0.7649	0.4678	0.6318	0.8511	0.735	0.8025	0.8456	0.7943	0.8355	0.7994	0.6669	0.6791	0.7753		0.8355	0.6729	0.81	0.8013	0.8391	0.7556	0.6822	0.7369	0.8276	0.8944	0.6135	0.812	0.699	0.7723	0.6599	0.8053	0.4162	0.7825	0.7546	0.8093	0.8802	0.5932	0.6188	0.7042
TMEM234	1569	RI	6.2	6.1	6.3	0	0.9782	0.7258	0.1518	0.5403	1	0.7943	0.5574	0.9421	0.6487	0.5654	0.7377	0.588	0.8704		0.9495	1	0.9603	0.7461		0.6858	0.4563	0.9486	1	0.858	0.6187	0.8509	0.5574	0.7907	0.4135	0.7869	0.7883	0.8238	0.9448	0.7405	0.6691	0.7123	1	0.5654	1	0.5018	1	0.873	0.7869
TMEM234	1570	RI	5.7	5.6	5.8	0	1	0.6042	0.0877	0.8604	0.9533	0.9373	0.9125	0.8426	0.8102	0.9456	0.9454	0.9666	0.9603	0.9723	0.7685	0.9363	0.866	1	1	0.9399	0.9676	0.8691	0.8102	0.8796	1	0.8564	0.9107	0.7933	0.8951	0.961	0.6285	0.8444	0.8409	0.8911	0.6377	0.973	0.9643	0.9649	0.7563	0.9208	0.9511	0.8576	0.8896
TMEM234	1571	RI	5.5	5.4	5.6	0	1	0.462	0.0607	0.8165	0.9476	0.8853	0.9118	0.9075	0.8963	0.8852	0.9443	0.9688	0.9128	0.9256	0.7837	0.9189	0.8344	0.941	0.9543	0.7209	0.9472	0.9252	0.7945	0.9095	0.8638	0.848	0.8969	0.8649	0.7705	0.9424	0.7979	0.8109	0.9025	0.9195	0.876	0.8532	0.9423	0.9156	0.9414	0.9697	1	0.8641	0.9066
TMEM234	1572	RI	5.2	5.1	5.3	0	0.8364	0.6209	0.1088		1		1	1	0.7402		0.909	0.7818	1	1	0.9071		0.9409	1		0.7402	1	1		0.8174	0.8769	1	1	0.8775	0.8411	1	0.9571	1	1	0.8301	0.8014	1		1	0.894	1	1	1	1
TMEM234	1573	RI	5.2:5.3	5.1	5.4	0	0.9964	0.68	0.0904	0.1712	0.2062	0.0798	0.2	0.3417	0.0682	0.0404	0.1445	0.0725	0.1962	0.1382	0.2725	0.1075	0.2571	0.1097	0.3784	0.1533	0.166	0.2365	0.2113	0.198	0.2179	0.3027	0.1598	0.2155	0.2183	0.1811	0.2198	0.394	0.2773	0.1749	0.2195	0.0908	0.1109	0.0732	0.2171	0.1988	0.3252	0.1307	0.2454
TMEM234	1574	AA	5.3	5.1	5.4	0	0.9873	0.1586	0.0332	0.0784	0	0.0733	0	0	0.0247	0.0676	0.018	0.0208	0	0	0.0387	0	0.0221	0		0.066	0	0	0	0.0525	0.039	0	0	0.0419	0.0543	0	0.0135	0	0	0.0391	0.0755	0	0.0536	0	0.0333	0	0	0	0
TMEM234	1575	ES	4	3	5.1	0	0.9945	0.7776	0.1077	0.3028	0.203	0.2831	0.2155	0.3189	0.2737	0.118	0.0783	0.0767	0.2158	0.0681	0.2778	0.1195	0.3449	0.158	0.235	0.2973	0.2641	0.3045	0.2055	0.2592	0.2224	0.4068	0.144	0.3416	0.4821	0.1746	0.268	0.3007	0.4455	0.0795	0.2597	0.0812	0.1649	0.1078	0.3929	0.1676	0.372	0.2776	0.2978
TMEM234	1576	ES	02:03:04	1	5.1	0	0.9782	0.4679	0.0879	1	0.7743	1	1	0.9427	1	1	0.8769	0.6195	1		0.8714	1	0.9549	0.9019	1	0.8691	1	1	1	1	1	1	1	1	1	0.7222	0.9651	0.8931	0.9589	1	0.923	0.8904	0.7353	1	0.8813	0.8113	1	1	1
TMEM234	1577	ES	02:03:00	1	5.1	0	1	0.1221	0.0178	1	0.9531	1	1	0.9806	1	1	0.9884	0.9812	1	0.9707	0.957	1	0.9842	0.9891	1	0.9494	1	1	1	1	1	1	1	1	1	0.9492	0.9927	0.9663	0.9758	1	0.9845	0.9909	0.9692	1	0.9737	0.9678	1	1	1
LCK	1579	AP	2			0	0.8418	0.951	0.218	0	0		0.089	0.0315	0.1634	0.1535	0.1875	0	0		0	0	0	0	0	0	0.078	0.3187	0			0	0.078		0.4324	0	0	0	0	0.0659		0	0	0	0.1239	0.0123	0.4968	0.0224	0
LCK	1581	AP	1			0	0.8418	0.951	0.218	1	1		0.911	0.9685	0.8366	0.8465	0.8125	1	1		1	1	1	1	1	1	0.922	0.6813	1			1	0.922		0.5676	1	1	1	1	0.9341		1	1	1	0.876	0.9877	0.5032	0.9776	1
LCK	1582	AA	10.1	9	10.2	0	0.7982	0.3819	0.0681	0.0673	0.2401	0	0	0.0466	0	0.0918	0.0198	0.0215	0.0575		0	0.1122	0.1122	0.0918	0.0235	0.0561		0.1411	0.1317			0.0283	0		0.0673	0.0594	0.2521	0.0689	0.0259			0.0306	0.0481	0.0316		0.0481		0.0483	0.0777
LCK	1583	ES	8	7	9	0	0.9891	0.3783	0.0536	0.8789	0.8492	1	0.9588	0.9264	1	0.9474	0.9357	0.9353	0.9044		1	1	0.9706	1	1	1	1	0.9582	1	1	1	0.9875	1	1	1	0.9538	0.9546	0.9653	0.9214	1	1	0.9594	1	0.9402	1	0.9746	0.8402	0.9579	0.9682
LCK	1584	RI	4.2	4.1	4.3	0	0.8309	0.7089	0.1166	0.0796	0.0647	0.0545		0.1113	0.0844	0.0391	0.1332	0.0179	0.1215		0.0975	0.1034	0.3223	0.1034	0.0647	0.0505	0.5804	0.045	0.3156			0.1271	0.0441		0	0.1307	0.5546	0.2109	0.1148	0.1474	0.2187		0.0796	0.0271		0.1078	0.1034	0.0719	0.0609
HDAC1	1585	AP	1			0	1	0.0315	0.0033	1	1	0.9851	0.9963	1	1	0.9944	1	0.9928	0.9933	1	0.9931	0.9974	0.9964	1	1	1	0.9973	0.9937	1	0.998	1	1	1	0.9965	0.9978	1	0.9981	1	0.9964	1	1	0.9961	1	1	1	0.9971	1	1	1
HDAC1	1586	AP	2			0	1	0.0315	0.0033	0	0	0.0149	0.0037	0	0	0.0056	0	0.0072	0.0067	0	0.0069	0.0026	0.0036	0	0	0	0.0027	0.0063	0	0.002	0	0	0	0.0035	0.0022	0	0.0019	0	0.0036	0	0	0.0039	0	0	0	0.0029	0	0	0
BSDC1	1589	AT	10.2			0	1	0.0106	0.0009	0	0	0	0	0	0	0	0	0	0	0	0	0	0	0	0	0	0	0	0	0	0	0	0	0	0	0	0	0	0	0	0	0	0	0	0	0	0	0	0
BSDC1	1590	AT	11.3			0	1	0.0106	0.0009	1	1	1	1	1	1	1	1	1	1	1	1	1	1	1	1	1	1	1	1	1	1	1	1	1	1	1	1	1	1	1	1	1	1	1	1	1	1	1	1
BSDC1	1591	RI	11.2	11.1	11.3	0	1	0.3923	0.0632	0.0876	0.1453	0.0869	0.0378	0.116	0.0457	0.0613	0.0648	0.0432	0.181	0.0296	0.0909	0.0439	0.3053	0.065	0.0372	0.0525	0.0601	0.1227	0.1334	0.0821	0.0466	0.153	0.0668	0.0748	0.0452	0.0705	0.1699	0.1665	0.108	0.0742	0.1834	0.034	0.0342	0.043	0.176	0.0774	0.0641	0.0751	0.0731
BSDC1	1592	ES	10.1	9	11.1	0	1	0.0856	0.0143	0	0.0086	0.0191	0.0076	0.0265	0.0179	0.0152	0.0014	0.0024	0.0086	0	0.0126	0.006	0.0281	0.0155	0.029	0.0352	0.0084	0.0036	0.0246	0.0218	0.0584	0.0306	0.0298	0.0135	0.0202	0.0271	0.0041	0.01	0.0191	0	0.0378	0	0	0.003	0.0034	0.013	0.0028	0.0055	0.0244
BSDC1	1593	ES	6.2:7:8.1	6.1	8.2	0	1	0.0308	0.0039	1	1	1	1	0.9922	0.9869	1	1	1	1	0.9885	0.9955	1	1	0.9969	1	0.9936	0.9945	1	0.9947	1	1	1	1	0.9945	0.9945	0.997	1	1	1	1	1	1	1	0.9916	0.9925	0.996	1	0.9955	0.9951
BSDC1	1594	ES	4.1:4.2:4.3:5	3	6.1	0	1	0.0585	0.0043	1	1	1	1	1	1	1	1	1	1	1	1	1	1	1	1	1	1	1	1	1	1	0.9415	1	1	1	1	1	0.9618	1	1	1	1	1	1	1	1	1	0.9695	1
BSDC1	1595	ES	4.2:4.3:5	3	6.1	0	1	0.0132	0.0009	1	1	1	1	1	1	1	1	1	1	1	1	1	1	1	1	1	1	1	1	1	1	0.9868	1	1	1	1	1	0.994	1	1	1	1	1	1	1	1	1	0.995	1
BSDC1	1598	AA	4.1:4.2	3	4.3	0	0.9927	0.4398	0.0671	0.93	1	0.901	0.956	0.8283	1	0.9374	0.9012	1	0.9368	0.7487	0.935	0.8654	0.9391	0.9198	1	0.9264	0.9653	0.9275	0.9346	1	0.8999	0.8846	1	0.8599	0.811	0.985	0.8613	0.9107	0.9775	0.8632	0.9412	0.9322	0.9616	1	0.947	0.9627	0.9145	0.9637	1
BSDC1	1599	AA	4.2	3	4.3	0	1	0.1025	0.0162	0.9805	1	0.9713	0.9878	0.9777	1	0.9756	0.9757	1	0.9782	0.9295	0.9831	0.9533	0.9825	0.9761	1	0.9813	0.9922	0.9879	0.9914	1	0.9785	0.9712	1	0.9747	0.9824	0.9948	0.9746	0.9847	0.9952	0.9754	0.975	0.9907	0.9878	1	0.984	0.9929	0.9736	0.9939	1
BSDC1	1600	ES	4.1:4.2:4.3	3	5	0	0.9982	0.2199	0.0332	1	1	1	0.9666	0.971	1	1	1	0.9673	0.9227	1	0.9728	0.8928	1	0.9528	1	1	0.9715	0.8895	1	1	1	0.9685	1	0.9579	0.9186	0.9879	1	0.892	0.983	1	1	1	1	1	1	1	0.9656	1	0.954
BSDC1	1601	ES	4.2:4.3	3	5	0	1	0.0348	0.0064	1	1	1	0.9913	0.9969	1	1	1	0.9914	0.974	1	0.9934	0.9652	1	0.9869	1	1	0.9938	0.9817	1	1	1	0.993	1	0.9933	0.9936	0.9959	1	0.9818	0.9965	1	1	1	1	1	1	1	0.9902	1	0.9943
BSDC1	1603	AA	4.1	3	4.2	0	1	0.3903	0.059	0.2177	0.237	0.2233	0.2209	0.1053	0.2362	0.2819	0.1926	0.2256	0.2535	0.1909	0.2137	0.2434	0.2267	0.2375	0.1276	0.1996	0.1919	0.1426	0.1197	0.1332	0.1792	0.1951	0.2029	0.1453	0.0753	0.2677	0.1486	0.1424	0.1822	0.1424	0.3028	0.1243	0.2434	0.2822	0.2328	0.168	0.2305	0.1425	0.1203
BSDC1	1605	ES	3:4.1:4.2:4.3	2	5	0	0.9982	0.1963	0.0131	1	1	1	1	1	1	1	1	1	1	1	1	1	1	1	0.9077	1	1	1	1	1	1	1	1	1	1	1	1	0.9613	1	1	1	1	1	1	1	1	1	1	0.9525
BSDC1	1606	ES	3:4.2:4.3	2	5	0	1	0.0237	0.0022	1	1	1	1	1	1	1	1	1	1	1	1	1	1	1	0.9883	1	1	1	1	1	1	1	1	1	1	1	1	0.9937	1	1	1	1	1	1	1	1	1	1	0.9943
ZBTB8A	1609	AA	5.1	4	5.2	0	0.9927	0.5501	0.1091	1	0.7468	0.534	0.8585	0.8001	0.7192	0.7588	0.7023	0.6781	0.6832	0.8585	0.5996	0.6097	0.8142	0.8348	0.5741	0.9381	0.8577	0.6576	0.7449	0.6087	0.6866	0.7294	0.6064	0.8987	0.7402	0.7425	0.8594	0.6632	0.7875	0.5935	0.7659	0.6092	0.8209	0.7797	0.8729	0.762	0.9151	0.9175	0.7875
ZBTB8OS	1610	AT	8			0	1	0.4487	0.0745	0.1506	0.1594	0.1517	0.1941	0.2435	0.1818	0.1692	0.1343	0.2461	0.1987	0.2468	0.1785	0.2623	0.1775	0.1713	0.1614	0.2729	0.4025	0.3015	0.1083	0.2381	0.0585	0.155	0.1923	0.2469	0.362	0.2746	0.16	0.2655	0.0885	0.1545	0.2421	0.1373	0.2846	0.2223	0.1345	0.1792	0.2466	0.2188	0.2341
ZBTB8OS	1611	AT	7			0	1	0.4487	0.0745	0.8494	0.8406	0.8483	0.8059	0.7565	0.8182	0.8308	0.8657	0.7539	0.8013	0.7532	0.8215	0.7377	0.8225	0.8287	0.8386	0.7271	0.5975	0.6985	0.8917	0.7619	0.9415	0.845	0.8077	0.7531	0.638	0.7254	0.84	0.7345	0.9115	0.8455	0.7579	0.8627	0.7154	0.7777	0.8655	0.8208	0.7534	0.7812	0.7659
ZBTB8OS	1612	ES	5	4	6	0	1	0.3416	0.052	0.796	0.7318	0.8286	0.7109	0.8413	0.9022	0.6989	0.8839	0.8963	0.7344	0.8088	0.8402	0.7908	0.9173	0.8309	0.792	0.9714	0.7759	0.9366	0.9138	0.8909	0.9088	0.8585	0.9419	0.8132	0.7719	0.7438	0.9037	0.8372	0.8499	0.7797	0.8372	0.8919	0.851	0.7709	0.8211	0.8188	0.819	0.7923	0.8394
RBBP4	1615	AP	1			0	1	0.0311	0.0022	1	1	1	0.9934	1	0.9957	1	1	1	1	1	1	1	1	1	1	0.9932	0.9989	1	1	1	1	1	1	0.9982	1	1	1	1	1	1	1	1	0.9968	1	1	0.996	1	0.9959	1
RBBP4	1616	AP	2			0	1	0.0311	0.0022	0	0	0	0.0066	0	0.0043	0	0	0	0	0	0	0	0	0	0	0.0068	0.0011	0	0	0	0	0	0	0.0018	0	0	0	0	0	0	0	0	0.0032	0	0	0.004	0	0.0041	0
RBBP4	1622	AA	14.1	13	14.2	0	1	0.0132	0.0021	1	1	1	1	0.9993	1	0.9981	1	0.9979	1	1	1	0.9987	1	0.9971	1	0.9944	0.9994	0.9938	1	0.9989	1	1	0.9984	1	0.994	1	0.9991	0.9982	0.9994	1	0.9979	1	0.9988	0.9958	0.9968	0.9987	0.9977	1	0.9983
RBBP4	1623	ES	5	4	6	0	1	0.4597	0.0607	0.1006	0.2023	0.105	0	0	0	0.0431	0	0.0472	0.1002	0	0.1444	0	0	0	0	0	0.0378	0	0.1276	0.0918	0.07	0.14	0.0612	0.0288	0	0.0797	0.1215	0.0927	0.0777	0	0	0	0.0361	0	0.2202	0.1257	0.104	0.0464	0
RBBP4	1625	ES	4	3.2	6	0	1	0.0068	0.0006	1	1	1	1	1	1	1	1	1	0.9981	1	1	1	1	1	1	1	1	1	1	0.9967	1	1	1	1	1	0.999	1	1	1	1	1	1	1	1	1	1	1	1	1
RBBP4	1627	ES	04:06:00	3.2	7	0	1	0.0358	0.006	0.9931	0.9896	0.9954	0.9907	0.995	0.9864	0.9926	0.9945	0.992	0.99	0.9789	0.9913	0.995	0.9846	0.9917	0.978	0.9826	0.9883	0.9982	0.9981	0.9956	0.991	0.989	0.9879	0.9914	0.994	0.9907	0.9927	0.9938	0.9921	1	0.9812	0.9887	0.9932	0.9895	1	0.9918	0.997	0.9914	0.99
RBBP4	1629	AA	3.1	1	3.2	0	1	0.0959	0.0137	0.957	0.9813	1	0.9906	0.9872	0.9871	0.9907	0.9827	0.9674	0.9742	0.9721	0.9582	0.9795	0.9754	0.9879	0.9735	0.9434	0.9897	0.9777	0.925	0.9667	0.9767	0.985	1	0.9821	0.9924	0.9738	0.9834	0.981	0.9782	0.9907	0.9833	0.9881	0.9618	0.9896	1	0.9946	0.9829	0.9942	0.9819
KIAA1522	1631	AP	2			0	0.9891	0.8821	0.1559		0.2427		0.7957	0.685	0.4088	0.5697	0.7846	0.3439	0.5836	0.3736	0.6496	0.6302	0.6302	0.3139	0.3124	0.2795	0.5522	0.2862	0.3074	0.2822	0.5342	0.5494	0.6071	0.7611	0.6445	0.3775	0.2526	0.5421	0.684	0.4643	0.5955	0.6774	0.7163	0.6302	0.614	0.6816	0.5679	0.4836	0.5541
KIAA1522	1632	AP	1			0	0.9891	0.8821	0.1566		0.7573		0.2043	0.3035	0.5912	0.4303	0.2154	0.6561	0.409	0.6264	0.3444	0.3698	0.3698	0.6861	0.6876	0.7148	0.4478	0.7138	0.6648	0.7178	0.4658	0.4409	0.3929	0.2351	0.3555	0.6225	0.7454	0.4422	0.3116	0.5102	0.4045	0.3226	0.2837	0.3698	0.3745	0.3184	0.4251	0.5164	0.4459
KIAA1522	1633	AP	3			0	0.9891	0.0838	0.0113		0		0	0.0115	0	0	0	0	0.0075	0	0.006	0	0	0	0	0.0057	0	0	0.0278	0	0	0.0096	0	0.0038	0	0	0.0021	0.0158	0.0044	0.0254	0	0	0	0	0.0114	0	0.0071	0	0
KIAA1522	1634	ES	07:08:00	6	9	0	1	0.1008	0.0113	0.922	0.9951	0.8992	1	0.9914	0.9934	0.9975	0.9974	1	0.9957	0.9675	0.9759	0.9817	0.9843	0.9964	1	0.9979	0.987	1	0.985	1	0.9668	1	1	1	1	0.9949	0.99	1	0.9973	0.9958	0.9893	1	0.9683	0.9957	0.9874	0.9811	0.9853	1	1
S100PBP	1635	AT	9			0	1	0.6665	0.101	0.7259	0.6191	0.6793	0.7057	0.5423	0.674	0.6691	0.6718	0.695	0.5635	0.7131	0.6589	0.7025	0.4678	0.6576	0.7768	0.643	0.7252	0.6655	0.6778	0.7202	0.5976	0.6137	0.625	0.6162	0.7104	0.644	0.6139	0.5824	0.5357	0.1463	0.4085	0.5596	0.6519	0.6961	0.4681	0.7169	0.4725	0.6414	0.6522
S100PBP	1636	AT	7			0	1	0.6665	0.101	0.2741	0.3809	0.3207	0.2943	0.4577	0.326	0.3309	0.3282	0.305	0.4365	0.2869	0.3411	0.2975	0.5322	0.3424	0.2232	0.357	0.2748	0.3345	0.3222	0.2798	0.4024	0.3863	0.375	0.3838	0.2896	0.356	0.3861	0.4176	0.4643	0.8537	0.5915	0.4404	0.3481	0.3039	0.5319	0.2831	0.5275	0.3586	0.3478
S100PBP	1637	AA	4.1	3	4.2	0	0.9964	0.8612	0.0958	0.5476	0.6094	0.5804	0.6427	0.6518	0.7006	0.6275	0.5831	0.5691	0.6888	1	0.666	0.7573	0.7077	0.7722	0.7077	0.5711	0.5463	0.5337	0.6699	0.5537	0.5546	0.5955	0.6694	0.7045	0.4311	0.7191	0.6221	0.5613	0.6998	0.6174	0.7074	0.492	0.492	0.6355	0.5584	0.7491	0.8489	0.6423	0.6888
S100PBP	1638	AD	1.2	1.1	2	0	0.9309	0.4027	0.0839	1	0.8412	1	0.8835	0.8634	0.8835	1	1	1	1	1	0.9139	0.901	0.9175	1	1	1	1		1	0.6454	1	1	0.94	0.8082	1	0.8786	0.956	0.9238	0.8784	1	0.9265		0.8415	1	1	1	0.7145	0.8878	0.8835
FNDC5	1641	AT	6.2			0	0.9964	0.7114	0.1372	0	0.1562	0	0	0.6025	0	0.4198	0.0727	0.1489	0.4602	0.1713	0.0437	0	0.1304	0.0765	0.1695	0.1209	0	0.0875	0.2725	0	0.3797	0.0645	0.0231	0.0758	0.1091	0.324	0.2621	0.083	0.12	0.5078	0.1027	0.0317	0.095	0.6388	0.2775	0.1062	0.2613	0.1061	0.2985
FNDC5	1642	AT	7			0	0.9964	0.7114	0.1372	1	0.8438	1	1	0.3975	1	0.5802	0.9273	0.8511	0.5398	0.8287	0.9563	1	0.8696	0.9235	0.8305	0.8791	1	0.9125	0.7275	1	0.6203	0.9355	0.9769	0.9242	0.8909	0.676	0.7379	0.917	0.88	0.4922	0.8973	0.9683	0.905	0.3612	0.7225	0.8938	0.7387	0.8939	0.7015
TMEM54	1644	ES	00:03:04.100000	2	4.2	0	1	0.0406	0.0035	0.9975	0.9986	1	0.9919	0.997	0.9985	0.9959	0.996	0.993	0.9957	0.9962	0.9968	1	0.9959	0.9954	0.9594	1	0.9983	0.998	0.9973	0.9872	0.9948	0.9985	0.9984	0.9976	0.9993	0.9972	0.9995	0.9933	0.9913	0.9987	0.9947	0.9994	0.9951	0.9955	0.9982	0.9979	0.9991	0.9984	1
TMEM54	1645	ES	3	2	4.2	1	0.7618	0.4398	0.0724	0.8947	0.9543		0.6444	0.92	0.9625	0.9108	0.8691	0.8615	0.914	0.9175	0.9322		0.8913	0.8714			0.9363	0.9014	0.9113	0.7302	0.8733	0.9197	0.9405	0.9036		0.9195	0.9835	0.8455	0.7965	0.9242	0.8023	0.9615	0.8502	0.9242	0.9684	0.9673		0.9666
RNF19B	1646	AA	9.1	8	9.2	0	1	0.3474	0.056	0.262	0.2469	0.2015	0.2473	0.0966	0.3212	0.2657	0.1847	0.2028	0.1939	0.3353	0.2597	0.2281	0.1942	0.2198	0.1938	0.2504	0.1886	0.2163	0.2384	0.2406	0.2133	0.1949	0.3172	0.1756	0.2009	0.2369	0.2156	0.202	0.2593	0.1843	0.3337	0.2114	0.2302	0.2391	0.213	0.3376	0.1623	0.2006	0.2348
RNF19B	1647	AA	3.1	2	3.2	0	1	0.4829	0.048	0.2031	0.1949	0.2276	0.1925	0.217	0.2626	0.2124	0.175	0.1691	0.2223	0.2389	0.1766	0.1357	0.2893	0.2089	0.1994	0.1422	0.1849	0.2011	0.2243	0.1898	0.1225	0.2404	0.1835	0.2513	0.1357	0.1623	0.1733	0.2664	0.2458	0.204	0.3259	0.1657	0.1564	0.1647	0.2541	0.2397	0.1835	0.2384	0.1911
AK2	1649	AT	6			0	1	0.1595	0.0175	0.007	0.0102	0.0031	0.0069	0.0185	0.0086	0.0079	0.0067	0.0064	0.0043	0.0101	0.0197	0.0175	0.0293	0.0149	0.0039	0.0048	0.0103	0.0075	0.0161	0.1203	0.0313	0.0214	0.0201	0.0029	0.0266	0.0104	0.0253	0.0066	0.0174	0.0096	0.0634	0.0009	0.0031	0.013	0.0355	0.0034	0.0312	0.0063	0.0034
AK2	1650	AT	8.2			0	1	0.5244	0.0997	0.6646	0.6785	0.6867	0.6972	0.6732	0.7798	0.7385	0.6999	0.6572	0.4749	0.7512	0.6572	0.5526	0.6485	0.575	0.7595	0.7702	0.4786	0.6259	0.6329	0.5265	0.7418	0.616	0.5742	0.6494	0.671	0.4013	0.4289	0.636	0.4762	0.8163	0.4895	0.836	0.5668	0.5566	0.6657	0.6518	0.6733	0.5578	0.4459
AK2	1651	AT	10			0	1	0.5118	0.102	0.3284	0.3113	0.3102	0.2959	0.3083	0.2116	0.2536	0.2934	0.3364	0.5208	0.2386	0.3231	0.43	0.3222	0.4101	0.2366	0.225	0.5111	0.3666	0.351	0.3532	0.2269	0.3626	0.4056	0.3478	0.3024	0.5883	0.5458	0.3575	0.5064	0.1741	0.4471	0.1631	0.4301	0.4304	0.2988	0.3448	0.2955	0.436	0.5507
AK2	1652	ES	9	8.1	10	0	1	0.5005	0.051	0.0451	0.0488	0.0621	0.1081	0.0844	0.1112	0.0836	0.1139	0.0224	0.0443	0.1356	0.0893	0.0375	0.1139	0.072	0.0659	0.054	0.0371	0.0509	0.0684	0.0682	0.0817	0.0553	0.0848	0.0974	0.1966	0.0198	0.1279	0.1103	0.0401	0.1172	0.0406	0.1291	0.0503	0.0643	0.1885	0.0513	0.2606	0.0479	0.0733
AK2	1653	ES	5	4	7	0	1	0.1237	0.0176	0.992	0.9676	0.9799	0.9845	0.9843	0.9658	0.984	0.9623	0.9498	0.9733	0.9629	0.9635	0.9749	0.9675	0.9477	0.984	0.9883	0.9898	0.9609	0.9875	0.9749	0.9786	0.9833	0.982	0.991	0.9943	0.9857	0.9813	0.9554	0.9902	0.9848	0.9845	0.9558	0.9876	0.9724	0.963	0.9513	0.9652	0.9822	0.9885
AK2	1654	ES	02:03:00	1	4	0	1	0.3214	0.0567	0.9256	0.7911	0.9561	0.906	0.9058	1	0.9298	0.9015	0.7653	0.7901	0.9192	0.9433	0.9605	0.8614	0.9634	0.951	0.9292	0.9188	0.8744	0.9178	0.9632	0.9281	0.8833	1	0.8927	0.9743	0.818	0.8409	0.831	0.9111	0.7874	0.8229	0.9701	0.854	0.8325	0.8933	0.9184	0.9572	0.9338	0.9719
AK2	1655	ES	3	1	4	0	1	0.0183	0.0034	0.9941	0.9873	0.992	0.987	0.9904	1	0.996	0.989	0.9834	0.9825	0.9925	0.9974	0.9971	0.9867	0.9975	0.996	0.9946	0.9949	0.9911	0.9945	0.9969	0.994	0.9914	1	0.9927	0.9958	0.9922	0.9933	0.9907	0.9947	0.9864	0.9934	0.9972	0.9928	0.994	0.9878	0.9953	0.997	0.9947	0.9973
AK2	1656	ES	2	1	3	0	1	0.4775	0.04	0.0875	0.0578	0.1763	0.1386	0.1049	0.0706	0.0625	0.1113	0.065	0.077	0.0941	0.0505	0.0822	0.0955	0.0759	0.0881	0.0822	0.0662	0.0764	0.0741	0.0991	0.0914	0.0768	0.0616	0.0696	0.1619	0.041	0.0418	0.0537	0.0628	0.0601	0.0356	0.0992	0.0511	0.0367	0.1124	0.0606	0.0746	0.0836	0.1031
ADC	1659	AT	13			0	0.9964	0.6084	0.1049	1	0.8492		0.8836	0.8457	0.8894	0.707	0.7968	1	1	0.8492	0.6838	0.9332	1	1	1	1	1	0.8134	0.8327	0.937	0.7233	0.8751	0.8284	0.8327	1	0.6887	0.6642	0.9162	0.842	1	0.874	1	1	0.9465	0.86	0.9441	1	0.8971	0.7926
ADC	1660	AT	11			0	0.9964	0.6084	0.1049	0	0.1508		0.1164	0.1543	0.1106	0.293	0.2032	0	0	0.1508	0.3162	0.0668	0	0	0	0	0	0.1866	0.1673	0.063	0.2767	0.1249	0.1716	0.1673	0	0.3113	0.3358	0.0838	0.158	0	0.126	0	0	0.0535	0.14	0.0559	0	0.1029	0.2074
ADC	1662	ES	06:07:08	5	9	0	0.9891	0.3211	0.0262	1	1	1	1	1	1	1	1	1	1	1	1	1	1	1	1	1	1	1	1	1	1	1	1	1	1	1	1	1	1	1	1	1	1	1	1	1	1	0.965	1
TRIM62	1665	AP	1			0	0.9764	0.4095	0.0433		1		1	1	1	1	1	1	1		1	1	1	1	1	1	0.9772	0.9185	1	1	1	0.9585	1	1	1	0.9437	0.986	0.9363	0.9659	0.939	0.9827	1	1	0.7379	1	1	1	1	1
TRIM62	1666	AP	2			0	0.9764	0.4095	0.0433		0		0	0	0	0	0	0	0		0	0	0	0	0	0	0.0228	0.0815	0	0	0	0.0415	0	0	0	0.0563	0.014	0.0637	0.0341	0.061	0.0173	0	0	0.2621	0	0	0	0	0
PHC2	1670	AP	10			0	0.9909	0.5057	0.0871	1	0.8741		0.9378	0.9622	0.9566	0.9065	0.8759	0.9718	0.6452	0.9556	0.8721	0.866	0.7201	0.8015	0.7979	0.8928	0.6912	0.8481	0.866	0.7153	0.7665	0.8901	0.9229	0.9757	0.8926	0.8706	0.9159	0.8721	0.9073	0.8797	0.8731	0.8798	0.8413	0.9917	0.9542	0.9383	0.8186	0.893	0.9744
PHC2	1671	AP	1			0	0.9909	0.5057	0.0871	0	0.1259		0.0622	0.0378	0.0434	0.0935	0.1241	0.0282	0.3548	0.0444	0.1279	0.134	0.2799	0.1985	0.2021	0.1072	0.3088	0.1519	0.134	0.2847	0.2335	0.1099	0.0771	0.0243	0.1074	0.1294	0.0841	0.1279	0.0927	0.1203	0.1269	0.1202	0.1587	0.0083	0.0458	0.0617	0.1814	0.107	0.0256
PHC2	1674	AT	16			0	1	0.0717	0.0083	0.0228	0.0083	0.0041	0.0095	0.0149	0.0058	0.0081	0.0097	0	0.0378	0.0018	0.0164	0.0017	0.02	0.0054	0.0084	0.0089	0.0261	0.0312	0.0054	0.0096	0.0062	0.0201	0.0138	0.0079	0.004	0.0105	0.0226	0.0124	0.0395	0.0086	0.0118	0.006	0.0021	0.0019	0.0404	0.0055	0.0121	0.0141	0.0191
PHC2	1675	AT	17			0	1	0.0717	0.0083	0.9772	0.9917	0.9959	0.9905	0.9851	0.9942	0.9919	0.9903	1	0.9622	0.9982	0.9836	0.9983	0.98	0.9946	0.9916	0.9911	0.9739	0.9688	0.9946	0.9904	0.9938	0.9799	0.9862	0.9921	0.996	0.9895	0.9774	0.9876	0.9605	0.9914	0.9882	0.994	0.9979	0.9981	0.9596	0.9945	0.9879	0.9859	0.9809
ZSCAN20	1678	AT	6.2			0	1	0.6976	0.1236	0.5438	0.433	0.3444	0.1728	0.3954	0.376	0.3763	0.3523	0.4301	0.3647	0.2094	0.2444	0.384	0.4193	0.2843	0.1549	0.4116	0.2008	0.3409	0.3048	0.3167	0.4169	0.3748	0.3452	0.3239	0.1449	0.2463	0.338	0.4138	0.3572	0.771	0.3583	0.5486	0.3666	0.5132	0.3923	0.3975	0.4621	0.4536	0.4161
ZSCAN20	1679	AT	8			0	1	0.6976	0.1236	0.4562	0.567	0.6556	0.8272	0.6046	0.624	0.6237	0.6477	0.5699	0.6353	0.7906	0.7556	0.616	0.5807	0.7157	0.8451	0.5884	0.7992	0.6591	0.6952	0.6833	0.5831	0.6252	0.6548	0.6761	0.8551	0.7537	0.662	0.5862	0.6428	0.229	0.6417	0.4514	0.6334	0.4868	0.6077	0.6025	0.5379	0.5464	0.5839
CSMD2	1687	AT	50			0	1	0.7938	0.1791	0.5189	0.3457	0.6003	0.2822	0.4616	0.8601	0.8303	0.3802	0.5023	0.8017	0.3717	0.7455	0.6402	0.6182	0.4647	0.4326	0.6065	0.7033	0.5631	0.5254	0.765	0.7466	0.4073	0.4861	0.9856	0.1958	0.7366	0.3315	0.4825	0.6632	0.7601	0.4935	0.4064	0.3883	0.6234	0.5403	0.43	0.6375	0.2891	0.4929
CSMD2	1688	AT	51			0	1	0.3392	0.0693	0.1771	0.2437	0.1053	0.3052	0.1021	0.0547	0	0.278	0.1483	0.0223	0.2803	0.0861	0.0685	0.0681	0.1747	0.1898	0.0858	0.0756	0.1195	0.0372	0.0207	0	0.0971	0.0701	0	0.1125	0	0.1646	0.149	0.0771	0.0599	0.0734	0.208	0.1186	0.1164	0.0636	0.1426	0.0285	0.1545	0.1068
CSMD2	1689	AT	78			0	1	0.6855	0.1125	0.304	0.3457	0.2944	0.2998	0.1427	0.0459	0.1697	0.3419	0.3494	0.112	0.1282	0.1684	0.1436	0.2647	0.2768	0.1503	0.2459	0.1776	0.3174	0.4018	0.2143	0.2534	0.3094	0.2824	0.0144	0.383	0.2634	0.4487	0.3572	0.228	0.1298	0.3979	0.2575	0.214	0.2602	0.3961	0.3801	0.2313	0.474	0.2276
CSMD2	1690	AT	17.2			0	1	0.5576	0.089	0	0.0649	0	0.1128	0.2936	0.0393	0	0	0	0.064	0.2198	0	0.1477	0.049	0.0838	0.2274	0.0617	0.0435	0	0.0356	0	0	0.1862	0.1614	0	0.3087	0	0.0552	0.0113	0.0317	0.0502	0.0352	0.1282	0.2791	0	0	0.0473	0.1026	0.0824	0.1727
SMIM12	1697	AP	1.1			0	1	0.1705	0.0272	0.9556	0.9419	0.92	0.9435	0.976	0.99	0.9784	0.9594	0.9899	0.9812	0.9842	0.9427	0.9766	0.9254	0.9736	1	0.9814	0.9588	0.905	0.9624	0.899	0.9474	0.9527	0.9652	0.9838	0.9549	0.9311	0.8442	0.899	0.9665	0.9528	0.9484	0.9839	0.9752	0.9666	0.8971	0.9419	0.9426	0.9688	0.9763
SMIM12	1698	AP	2.1			0	1	0.1705	0.0272	0.0444	0.0581	0.08	0.0565	0.024	0.01	0.0216	0.0406	0.0101	0.0188	0.0158	0.0574	0.0234	0.0746	0.0264	0	0.0186	0.0412	0.095	0.0376	0.101	0.0526	0.0473	0.0348	0.0162	0.0451	0.0689	0.1558	0.101	0.0335	0.0472	0.0516	0.0161	0.0248	0.0334	0.1029	0.0581	0.0574	0.0312	0.0237
SMIM12	1699	AT	7			0	1	0.1336	0.02	0.0157	0.0331	0.0273	0.0319	0.0269	0.0102	0.0154	0.0192	0.0159	0.0369	0.0097	0.023	0.0101	0.0816	0.0168	0.0162	0.0286	0.026	0.0434	0.0466	0.0364	0.0315	0.0498	0.0329	0.0275	0.0173	0.0279	0.045	0.0564	0.0284	0.1371	0.0381	0.0162	0.0227	0.0097	0.0675	0.0207	0.0568	0.0285	0.0385
SMIM12	1700	AT	4.2			0	1	0.1336	0.02	0.9843	0.9669	0.9727	0.9681	0.9731	0.9898	0.9846	0.9808	0.984	0.9631	0.9903	0.977	0.9899	0.9184	0.9832	0.9838	0.9714	0.974	0.9566	0.9534	0.9636	0.9685	0.9502	0.9671	0.9725	0.9827	0.9721	0.955	0.9436	0.9716	0.8629	0.9619	0.9838	0.9773	0.9903	0.9325	0.9793	0.9432	0.9715	0.9615
SMIM12	1701	AD	1.3	1.2	4.1	0	0.9964	0.4878	0.1041	1	0.7925	0.5601	0.7992	0.9272	0.7669	0.8965	0.9552	0.8268	0.7094	0.6293	0.9272	0.8751	0.8167	0.7669	0.7854	0.6434	0.873	0.8478	1	0.8958	0.8359	0.844	0.6311	0.8821	0.8767	0.784	0.946	0.8628	0.8969	0.908	1	0.7048	0.797	0.9532	0.8006	0.8478	0.8657	0.9342	1
SMIM12	1702	AD	1.2:1.3	1.1	4.1	0	1	0.2443	0.0392	0.0772	0.0919	0.0364	0.1013	0.0611	0.0899	0.1535	0.1287	0.1187	0.0614	0.0673	0.2048	0.0788	0.1771	0.1166	0.1074	0.0434	0.1476	0.1454	0.0581	0.1318	0.0673	0.1405	0.1592	0.088	0.1332	0.1196	0.2037	0.2076	0.1426	0.1652	0.19	0.0728	0.1513	0.1045	0.1095	0.1574	0.1788	0.1353	0.1322
SMIM12	1703	AD	1.2	1.1	4.1	0	1	0.1221	0.018	0.008	0.0244	0.0247	0.0236	0.0047	0.026	0.026	0.0129	0.027	0.0224	0.035	0.0188	0.0127	0.0489	0.0424	0.0273	0.0279	0.024	0.0367	0	0.021	0.012	0.0295	0.0969	0.0133	0.0231	0.0363	0.0136	0.0381	0.0217	0.0205	0	0.0273	0.0438	0.0059	0.0253	0.0373	0.0323	0.0131	0
GJB3	1704	AP	1			0	0.9273	1	0.179	0.4859	0.3623	0	0.3172	0.8491	0.5723	0.5397	0.4849	0.6402	0.5778	0.4346	0.5188	0.8303	0.473	0.4274	0.3625	0.4148	0.4594	0.7192	0.8904	0.8343	0.5649	0.5594	0.6836	0.8264	0.7845	0.7421	0.7238	0.4848	0.7015	0.7345	0.6783	0.6749	0.7309	0.8908	0.7251	0.8125	0.5959	0.6155	0.6467
GJB3	1705	AP	2			0	0.9273	1	0.179	0.5141	0.6377	1	0.6828	0.1509	0.4277	0.4603	0.5151	0.3598	0.4222	0.5654	0.4812	0.1697	0.527	0.5726	0.6375	0.5852	0.5406	0.2808	0.1096	0.1657	0.4351	0.4406	0.3164	0.1736	0.2155	0.2579	0.2762	0.5152	0.2985	0.2655	0.3217	0.3251	0.2691	0.1092	0.2749	0.1875	0.4041	0.3845	0.3533
ZMYM6	1708	AP	1			0	0.9745	0.7684	0.1308	0.517	0.6022	0.6109	0.9166	0.6767	0.4923	0.5725	0.7422	0.4239	0.5265	0.8626	0.6624	0.5716	0.3706	0.6846	0.6109	0.6109	0.5051	0.7694	0.7019	0.7167	0.5954	0.6224	0.7019	0.5314	0.6178	0.4673	0.5273	0.3291	0.5567	0.5668	0.5345	0.4398	0.6297	0.4022	0.6102	0.3926	0.4265	0.4391	0.3634
ZMYM6	1709	AP	2			0	0.9745	0.7684	0.1308	0.483	0.3978	0.3891	0.0834	0.3233	0.5077	0.4275	0.2578	0.5761	0.4735	0.1374	0.3376	0.4284	0.6294	0.3154	0.3891	0.3891	0.4949	0.2306	0.2981	0.2833	0.4046	0.3776	0.2981	0.4686	0.3822	0.5327	0.4727	0.6709	0.4433	0.4332	0.4655	0.5602	0.3703	0.5978	0.3898	0.6074	0.5735	0.5609	0.6366
ZMYM6	1710	AT	18			0	1	0.3146	0.0475	0.2352	0.3161	0.2154	0.2877	0.2692	0.2371	0.2809	0.2808	0.2115	0.3515	0.2264	0.3291	0.2728	0.3032	0.2707	0.2369	0.3111	0.3868	0.3042	0.2813	0.2256	0.1919	0.2826	0.2864	0.3473	0.3132	0.3442	0.3403	0.4202	0.3227	0.3531	0.3038	0.3105	0.2727	0.2789	0.3556	0.3079	0.205	0.392	0.317
ZMYM6	1711	AT	6.2			0	1	0.3277	0.0486	0.1033	0.122	0.0687	0.1006	0.1464	0.1991	0.1624	0.1255	0.1809	0.0962	0.1371	0.1276	0.1248	0.1894	0.1576	0.1694	0.0477	0.096	0.0621	0.1029	0.155	0.1783	0.1042	0.1658	0.0894	0.1048	0.1036	0.1097	0.0636	0.0749	0.1203	0.16	0.0991	0.1219	0.09	0.1312	0.0799	0.261	0.1005	0.1084
ZMYM6	1712	AT	20			0	1	0.3344	0.0482	0.6615	0.5619	0.7159	0.6117	0.5844	0.5638	0.5567	0.5937	0.6076	0.5523	0.6365	0.5432	0.6024	0.5074	0.5716	0.5936	0.6412	0.5172	0.6337	0.6158	0.6194	0.6298	0.6132	0.5477	0.5632	0.582	0.5522	0.55	0.5162	0.6024	0.5266	0.5363	0.5904	0.6054	0.6312	0.5132	0.6121	0.5339	0.5075	0.5746
ZMYM4	1716	ES	10:11:00	9	12	0	0.9982	0.0339	0.0015	1	1	1	1	1	1	1	1	1	1	1	1	1	1	1	1	1	1	1	1	1	1	1	1	1	1	1	1	1	1	1	1	1	1	1	1	1	1	1	1
KIAA0319L	1717	AP	12			0	0.9927	0.411	0.0438	0.0703	0.0769	0.3777	0	0	0	0.0192	0.0324	0	0.0311	0	0.0222	0	0.017	0.0886	0	0	0.011	0.0504	0.0372	0.0802	0.107	0.0822	0.0275	0	0.0189	0.0248	0.0652	0.0912	0.0217	0.0927	0.0104	0	0	0	0.1075	0.0329	0.0426	0	0
KIAA0319L	1718	AP	2.1			0	0.9927	0.6843	0.0815	0.8952	0.6096	0.5853	0.7307	0.7759	0.9105	0.8301	0.8248	0.945	0.8776	0.7461	0.7495	0.7647	0.8833	0.7597	0.7923	0.8027	0.7624	0.7524	0.7623	0.8282	0.7795	0.7433	0.8308	0.8117	0.8148	0.7687	0.6924	0.6559	0.8511	0.5898	0.8487	0.7268	0.8215	0.807	0.7095	0.8546	0.7072	0.8048	0.8715
KIAA0319L	1719	AP	1			0	0.9927	0.4423	0.0672	0.0344	0.3135	0.037	0.2693	0.2241	0.0895	0.1506	0.1428	0.055	0.0913	0.2539	0.2283	0.2353	0.0997	0.1517	0.2077	0.1973	0.2266	0.1972	0.2005	0.0916	0.1135	0.1744	0.1416	0.1883	0.1663	0.2064	0.2424	0.2529	0.1272	0.3176	0.141	0.2732	0.1785	0.193	0.1829	0.1126	0.2502	0.1952	0.1285
KIAA0319L	1723	AA	10.1	9	10.2	0	0.98	0.1299	0.0125	1	1	1	1	1	1	1	0.9763	1	1	1	1	1	1	1	1	1	1	1	1	1	1	0.9628	1	1	1	1	0.9899	1	1	1	1	1	1	1	1	1	1	1	1
KIAA0319L	1724	ES	7	6	8	0	0.9982	0.0835	0.0095	1	1	1	1	1	0.976	1	0.9859	1	1	1	1	1	0.9877	0.9851	1	0.9809	0.9924	1	1	0.9877	1	1	0.9931	1	0.9858	1	1	0.9826	1	1	0.9933	1	1	1	1	1	1	1	1
KIAA0319L	1725	ES	4	3	5	0	1	0.3784	0.0269	0.9426	1	0.9905	0.9384	1	1	0.9679	0.96	0.9556	0.9516	0.9713	0.9867	1	0.9712	0.9857	0.9445	1	0.9751	1	0.9697	0.9823	0.9878	1	1	0.975	0.9456	0.988	0.9913	0.9776	0.9729	0.9127	0.9778	1	0.9717	1	1	0.9573	1	1	0.9564
KIAA0319L	1726	AD	2.2	2.1	3	0	0.8382	0.1666	0.0262		0.0211	0		0.0608	0	0.0255	0	0	0		0.0391		0.0157	0.0322	0	0.0391	0.0347	0	0.0164	0.0101	0	0.0576	0	0	0.0144	0	0.0391		0		0.0084	0	0	0.0391		0	0.0354	0	0
NCDN	1727	AD	1.2:1.3	1.1	2	0	0.9909	0.2191	0.0163	1	1	1	1	1	1	1	1	1	1	1	1	1	1	1	1	1	1	1	1	1	1	1	1	1	1	1	1	1	1	1	1	1	1	1	1	1	1	1	1
NCDN	1728	ES	1.3	1.1	2	0	0.9455	0.1577	0.0142		1		1	1	1	1	1	1	1		1	1	1	1	1	1	1	1	1	1	1	1	1	1	1	1	1	1	1	1	1	1	1	1	1	1	1	1	1
NCDN	1729	RI	1.2	1.1	1.3	0	0.9891	0.8738	0.1325	0.4694	0.6656	1	0.3966	0.619	0.1262	0.3939	0.5115	0.4643	0.5149	0.6216	0.6026	0.6389	0.3676	0.2843	0.3538	0.3244	0.5094	0.5945	0.2614	0.5412	0.4899	0.4744	0.6113	0.4694	0.5935	0.371	0.6469	0.6546	0.2704	0.706	0.4824	0.6092	0.5227	0.5924	0.55	0.6216	0.4603	0.5373	0.547
CLSPN	1730	AT	25			0	1	0.7943	0.1526	0.4307	0.5617	0.6355	0.4149	0.6652	0.6199	0.49	0.4767	0.6391	0.6413	0.7895	0.6659	0.2944	0.5567	0.6885	0.4762	0.6994	0.7257	0.7185	0.6624	0.7141	0.5319	0.6233	0.6651	0.3626	0.7303	0.7442	0.7335	0.697	0.5808	0.1778	0.5577	0.348	0.6488	0.7212	0.511	0.6227	0.5543	0.5663	0.5509
CLSPN	1731	AT	26			0	1	0.7943	0.1526	0.5693	0.4383	0.3645	0.5851	0.3348	0.3801	0.51	0.5233	0.3609	0.3587	0.2105	0.3341	0.7056	0.4433	0.3115	0.5238	0.3006	0.2743	0.2815	0.3376	0.2859	0.4681	0.3767	0.3349	0.6374	0.2697	0.2558	0.2665	0.303	0.4192	0.8222	0.4423	0.652	0.3512	0.2788	0.489	0.3773	0.4457	0.4337	0.4491
CLSPN	1732	AA	11.1	10	11.2	0	0.8855	0.2862	0.0412		1	1		0.951	1	1	1	1	0.939		1	1	0.967	0.9214	1	0.8593	1	1	1	1	1	1	1	1	0.8319	1	0.9916	1	0.963	1	0.9753		0.905	1	1	1	1	1	1
CLSPN	1733	ES	9	8	10	0	0.9036	0.2359	0.027		0.9038	1		1	1	1	1	1	1		1		1	1	1	1	0.9872	1	1	1	1	1	0.9267	1	1	1	0.9907	0.9589	0.9637	1	1		1	0.877	0.8341	1	1	1	1
AGO1	1734	AP	1			0	0.8655	0.9603	0.2814		0.1176		0	0.7059	0.6154	0.375	0		0.2353		0.65		0.68	0		0	0	0	0	0		0	0	0	0	0.7727	0.6154	0	0.7755	0.2353	0.7205		0.2143	0		0		0	0
AGO1	1735	AP	2			0	0.8655	0.9603	0.2814		0.8824		1	0.2941	0.3846	0.625	1		0.7647		0.35		0.32	1		1	1	1	1	1		1	1	1	1	0.2273	0.3846	1	0.2245	0.7647	0.2795		0.7857	1		1		1	1
AGO3	1739	AT	7.2			0	1	0.3208	0.0507	0.1138	0.0774	0.0451	0.0341	0.0376	0.0854	0.2483	0.1054	0.0729	0.0678	0.1623	0.0784	0.0251	0.173	0.0873	0.2205	0.0525	0.0374	0.0837	0.124	0.1082	0.1364	0.0654	0.0991	0.035	0.0433	0.1294	0.1118	0.0831	0.1661	0.0788	0.0934	0.0617	0.0066	0.0434	0.0684	0.0161	0.0949	0.0699	0.1028
AGO3	1740	AT	8			0	1	0.6299	0.1098	0.1853	0.189	0.3773	0.2322	0.1572	0.2297	0.3267	0.1394	0.2669	0.1418	0.1941	0.5952	0.4473	0.1185	0.253	0.1318	0.2747	0.2345	0.2569	0.3222	0.3544	0.1903	0.1999	0.2263	0.0916	0.3924	0.3966	0.2679	0.1913	0.4445	0.1557	0.2112	0.1291	0.1373	0.6128	0.1176	0.3202	0.2484	0.3467	0.2971
AGO3	1741	AT	22			0	1	0.7096	0.1234	0.7008	0.7336	0.5777	0.7337	0.8052	0.6849	0.4249	0.7552	0.6603	0.7904	0.6437	0.3264	0.5275	0.7084	0.6597	0.6477	0.6728	0.7281	0.6594	0.5538	0.5375	0.6733	0.7347	0.6746	0.8734	0.5643	0.474	0.6203	0.7257	0.3894	0.7655	0.6954	0.8092	0.8562	0.3438	0.814	0.6637	0.6567	0.5835	0.6001
AGO3	1742	ES	6	5	9	0	0.9673	0.251	0.0219	1	1		1	1	1	1	1	1	1	1	1	0.749	1	1	1	1	1	1	1	1	1	1	1	1	1	1	1	1	1	1	1	1	1	1	1	1	1	1	1
AGO3	1743	ES	4	3	5	0	0.9818	0.2405	0.029		0.9325	1	1	1	1	1	1	1	1	1	1	1	0.8931	1	1	0.9466	1	1	0.9489	1	1	1	1	1	1	1	0.9722	1	1	1	1	1	1	1	0.9329	1	0.938	1	1
COL8A2	1749	AD	3.2	3.1	4	0	0.8582	0.2436	0.0333	1	1		1	0.9632	1	1	1	1		1	0.7775		1	1	1	1		1	1	1		0.9528	1		1	1	1	0.9459	1	1	0.9903		1	1	1	1	1	0.9332	1
TRAPPC3	1752	ES	4	3	5	0	1	0.146	0.0178	0.0304	0.0296	0.0161	0.0134	0.0212	0.0022	0.0045	0.0173	0.0082	0.0302	0.0078	0.0202	0.0121	0.0576	0.0152	0.004	0.0208	0.0149	0.0369	0.0439	0.0351	0.0162	0.0481	0.0281	0.0212	0.0177	0.0249	0.0792	0.0395	0.0263	0.0067	0.0184	0.0085	0.0063	0.0076	0.0383	0.0187	0.0166	0.0171	0.0386
TRAPPC3	1753	AD	1.3	1.2	2	0	1	0.2203	0.0323	1	1	1	1	1	1	0.9746	0.9786	0.9728	0.9465	0.8415	1	1	1	1	1	1	0.8862	0.9253	1	0.9511	1	1	0.9281	0.9725	0.9767	0.9783	0.9627	0.9803	0.9637	1	0.9524	1	0.9683	1	0.9691	1	1	0.9488	0.9733
TRAPPC3	1754	AD	1.2:1.3	1.1	2	0	1	0.368	0.0586	0.1808	0.1611	0.0372	0.2693	0.0955	0.1634	0.1603	0.1783	0.2181	0.1481	0.2084	0.2076	0.1841	0.2703	0.1907	0.2598	0.1516	0.1265	0.1995	0.2831	0.1926	0.1678	0.1629	0.1536	0.1958	0.1631	0.1908	0.2701	0.2308	0.2119	0.2886	0.1957	0.1332	0.1887	0.1498	0.2523	0.2378	0.1315	0.1786	0.2607
TRAPPC3	1755	AD	1.2	1.1	2	0	1	0.0683	0.0087	0	0	0	0	0	0	0.0045	0.0051	0.0071	0.01	0.0683	0	0	0	0	0	0	0.0186	0.0212	0	0.0187	0	0	0.0173	0.0077	0.0051	0.0054	0.0151	0.0066	0.0096	0	0.0153	0	0.0087	0	0.0147	0	0	0.0125	0.0101
MAP7D1	1756	AP	9			0	0.9927	0.7697	0.1347	0.1831	0.1763		0.1588	0.0852	0.0555	0.0409	0.0878	0.1929	0.0753	0	0.1037	0	0.2949	0.0946		0	0.0688	0.2849	0.1831	0.0564	0.11	0.2748	0.1126	0.0255	0.098	0.1112	0.1277	0.1831	0.1504	0	0.1377	0.0346	0.0869	0.035	0.5318	0.1238	0.1015	0.1068	0.2099
MAP7D1	1757	AP	1			0	0.9927	0.7697	0.1347	0.8169	0.8237		0.8412	0.9148	0.9445	0.9591	0.9122	0.8071	0.9247	1	0.8963	1	0.7051	0.9054		1	0.9312	0.7151	0.8169	0.9436	0.89	0.7252	0.8874	0.9745	0.902	0.8888	0.8723	0.8169	0.8496	1	0.8623	0.9654	0.9131	0.965	0.4682	0.8762	0.8985	0.8932	0.7901
MAP7D1	1758	AA	15.1	14	15.2	0	1	0.1706	0.0241	0.0883	0.1277	0.0911	0.0826	0.0747	0.135	0.071	0.069	0.0809	0.1623	0.1335	0.0809	0.0854	0.094	0.1275	0.0719	0.0857	0.1257	0.0915	0.1325	0.1198	0.1326	0.0879	0.1124	0.099	0.0372	0.0967	0.0997	0.0988	0.1053	0.0905	0.0929	0.1147	0.0656	0.1569	0.0639	0.1299	0.0948	0.0859	0.1326
MAP7D1	1759	AA	11.1	10	11.2	0	0.9982	0.2355	0.0337	0.9738	0.9596		0.8919	0.9293	0.8869	0.9067	0.8963	0.9283	0.919	0.8855	0.9687	0.9526	0.8829	0.9672	1	0.9301	0.9077	0.9713	0.9494	0.9595	0.9206	0.9529	0.9335	0.9196	0.9397	0.879	0.9535	0.9505	0.9211	0.9351	0.9325	0.9513	0.9486	0.9523	0.9652	0.9466	0.9296	0.9403	0.8989
MAP7D1	1760	RI	7.2	7.1	7.3	0	0.9891	0.6773	0.1319		0.668		0.7291	0.3907	0.7057	0.6855	0.5415	0.4848	0.4581	0.6314	0.3948	0.6877	0.7494	0.8607		0.4295	0.4322	0.8815	0.6976	0.815	0.774	0.7209	0.583	0.6619	0.5557	0.6966	0.7618	0.8255	0.6414	0.5502	0.6906	0.4858	0.6233	0.5692	0.8271	0.3743	0.8255	0.7178	0.5722
MAP7D1	1761	ES	6	5	7.1	0	1	0.4121	0.0664	0.6575	0.7063	0.96	0.789	0.7797	0.7773	0.8229	0.7807	0.7928	0.7341	0.9065	0.8248	0.7737	0.8244	0.7271	0.6691	0.8772	0.7195	0.7436	0.6561	0.8797	0.763	0.7112	0.7573	0.8063	0.7682	0.7771	0.7994	0.8136	0.8215	0.8164	0.7541	0.7077	0.7638	0.7875	0.8069	0.7647	0.7222	0.7636	0.7973
THRAP3	1762	ES	2	1	3	0	0.9745	0.3812	0.0464	0.0809	0.025	0.1594	0.0503	0.041	0.0695	0.1364	0.0993	0.1299	0.0554	0.1704	0.0931	0.0331	0.05	0.0801	0.0931	0.1175	0.044	0.0127	0.0788	0.0777	0.0474	0.1946	0.0519	0.045	0.0564	0.1133	0.0554	0.0968	0.0536	0.1523	0.0299	0	0.0236	0.0201	0.0152	0.1433	0.1306	0.0367	0.0212
SH3D21	1765	AT	16.2			0	0.9927	0.8626	0.1633	0.2706	0.3096	0	0.129	0.1565	0.8433	0.3442	0.4834	0.1831	0.3678		0.0653	0.1896	0.1911	0.1941		0.1715	0.2996	0.3187	0.2907	0.3325	0.2018	0.3862	0.2448	0.3678	0.4646	0.1612	0.2188	0.1662	0.3692	0.4728	0.1595	0.642	0.5669	0.288	0.2462	0.6059	0.4702	0.1606	0.306
SH3D21	1766	AT	19			0	0.9927	0.8626	0.1633	0.7294	0.6904	1	0.871	0.8435	0.1567	0.6558	0.5166	0.8169	0.6322		0.9347	0.8104	0.8089	0.8059		0.8285	0.7004	0.6813	0.7093	0.6675	0.7982	0.6138	0.7552	0.6322	0.5354	0.8388	0.7812	0.8338	0.6308	0.5272	0.8405	0.358	0.4331	0.712	0.7538	0.3941	0.5298	0.8394	0.694
SH3D21	1767	ES	12:13:00	11	14	0	0.9855	0.5014	0.0622	1	0.9689	1	1	0.8703	1	1	0.9242	1	0.8576		0.9487	1	1	0.87	1	1	0.9614	0.894	1	0.8876	0.8863	1	0.944	0.8881	1	0.9287	0.9711	1	1	0.9495	0.8746	1	1	1	0.9605	1	0.9183	0.9678	1
SH3D21	1768	ES	07:08:00	6	9	0	0.9436	0.5268	0.0883		1	1	1	0.9023		0.9151	0.8769		1		0.929	0.634	0.8298	0.8701	1	1	0.9132	0.9137	1	0.8899	0.5705	0.9738	1	1	0.6063	0.886	0.9632	0.9227	1	0.9227	0.8683	0.822	0.9305	0.8236	0.945	1	1	1	1
SH3D21	1769	ES	5	4.2	6	0	0.9255	0.2748	0.0344		1	1	1	1		1	1		1		1	1	1	1		1	0.9668	1	1	1	1	0.9745	1	1	1	1	0.9925	1	1	1	1		1	1	0.9652	1	1	0.9504
STK40	1772	RI	11.2	11.1	11.3	0	1	0.2767	0.0354	0.0792	0.0458	0.0203	0.0212	0.0287	0.0121	0.0267	0.0314	0.0132	0.0563	0.0119	0.0258	0.0452	0.0511	0.0102	0	0.0035	0.0241	0.0941	0.0473	0.0416	0.0284	0.0351	0.0171	0.0281	0.0279	0.028	0.0559	0.1216	0.0619	0.0247	0.028	0.0171	0.005	0.0141	0.2143	0.0429	0.0801	0.0576	0.1151
STK40	1773	AA	4.1	3	4.2	0	0.9909	0.268	0.029	0	0.016	0.0481	0	0.0154	0.0705	0	0.0144	0	0.036	0.1195	0.0403	0	0.0341	0.009	0	0.0332	0	0.024	0	0	0.0298	0.0266	0.051	0.0205	0	0.0151	0.0151	0.071	0.0151	0.0169	0.0263	0.0817	0.0276	0.0542	0.0787	0.0817	0.018	0.0528	0.0999
STK40	1774	ES	2	1	3	0	0.9982	0.6975	0.1257	0.7704	0.5778	0.9232	0.6295	0.4391	0.5327	0.7156	0.6094	0.5935	0.6023	0.6742	0.5195	0.7704	0.4992	0.481	0.5414	0.6299	0.6342	0.4174	0.4866	0.7079	0.7472	0.3862	0.7612	0.4562	0.7459	0.6764	0.6871	0.6509	0.6116	0.5496	0.6007	0.425	0.5689	0.6681	0.5582	0.4412	0.5881	0.356	0.4895
OSCP1	1775	AP	1			0	0.9873	0.15	0.014	1	1	0.9121	1	0.9902	1	1	0.9737	1	1	1	1	1	1	0.9818	1	1	1	1	1	0.954	1	0.9555	1	1	1	1	1	1	1	1		1	1	1	1	1	1	1	1
OSCP1	1776	AP	3			0	0.9873	0.15	0.014	0	0	0.0879	0	0.0098	0	0	0.0263	0	0	0	0	0	0	0.0182	0	0	0	0	0	0.046	0	0.0445	0	0	0	0	0	0	0	0		0	0	0	0	0	0	0	0
OSCP1	1777	AT	7			0	0.9945	0.8751	0.1569	0.5071	0.7178	0.7996	0.1775	0.4982	0.4024	0.4459	0.6358	0.3849	0.162	0.631	0.5014	0.5005	0.5903	0.3922	0.4842	0.2749	0.3763	0.4033	0.6084	0.4861	0.6907	0.5117	0.3194	0.5876	0.3887	0.5998	0.5167	0.318	0.3916	0.3503		0.3431	0.1803	0.3603	0.3462	0.3068	0.3573	0.2679	0.6489
OSCP1	1778	AT	13.2			0	0.9945	0.8751	0.1569	0.4929	0.2822	0.2004	0.8225	0.5018	0.5976	0.5541	0.3642	0.6151	0.838	0.369	0.4986	0.4995	0.4097	0.6078	0.5158	0.7251	0.6237	0.5967	0.3916	0.5139	0.3093	0.4883	0.6806	0.4124	0.6113	0.4002	0.4833	0.682	0.6084	0.6497		0.6569	0.8197	0.6397	0.6538	0.6932	0.6427	0.7321	0.3511
OSCP1	1779	ES	11.2:12:13.1	11.1	13.2	0	0.9964	0.0592	0.0029	1	1	1	1	1	1	1	1	1	1	1	1	1	1	1	1	1	1	1	1	1	1	1	1	1	1	1	1	1	1	1	1	1	1	1	1	1	1	1	1
OSCP1	1780	ES	2	1	4	0	0.8291	0.2317	0.0308	0.2317	0.0402		0	0	0	0.0642	0	0		0	0	0	0.0253	0					0	0	0	0	0	0		0	0.0363	0	0			0.0339		0	0		0.045	0.0209	0.0293
CSF3R	1786	RI	17.3	17.2	17.4	0	1	0.2651	0.0146	1	0.989	1	1	1	1	1	0.9947	1	1	1	1	1	1	1	1	1	1	0.9932	1	1	1	0.9894	1	1	1	0.9793	0.9844	1	1	1	1	1	1	1	1	1	1	0.9919	0.9949
CSF3R	1787	AA	17.1	16	17.2	0	0.8673	0.3779	0.0574	0.0287	0.1023		0.0662	0.0287	0.0424	0	0.1041		0.1319		0.1587	0.1698	0.1663	0.1856	0		0.1078	0.2268	0.1173	0.1971	0.0961	0.0814	0.0272			0.0814	0.1781	0.0642	0.0649			0.0558	0.21	0.1173		0.1234	0.1173	0.1214	0.1114
CSF3R	1788	ES	15	14	16	0	0.9818	0.0825	0.0036	1	1	1	1	1	1	1	1	1	1	1	1	1	1	1	1	1	1	1	1	1	1	1	1	1	1	1	1	1	1	1	1	1	1	1		1	1	1	1
MEAF6	1792	AP	2.1			0	1	0.025	0.003	0	0.0023	0	0	0.002	0	0	0	0	0.0036	0	0.0007	0.0008	0.0046	0.0034	0	0	0.0036	0.0057	0.0028	0.0039	0.0033	0.0032	0	0.0005	0	0.0005	0.0126	0.0057	0.0021	0.0121	0.0026	0	0.0015	0	0.0077	0	0.0015	0	0.0032
MEAF6	1793	AP	1			0	1	0.025	0.003	1	0.9977	1	1	0.998	1	1	1	1	0.9964	1	0.9993	0.9992	0.9954	0.9966	1	1	0.9964	0.9943	0.9972	0.9961	0.9967	0.9968	1	0.9995	1	0.9995	0.9874	0.9943	0.9979	0.9879	0.9974	1	0.9985	1	0.9923	1	0.9985	1	0.9968
MEAF6	1794	AT	8.2			0	1	0.0443	0.0034	0	0	0	0	0	0	0	0	0	0	0	0	0	0	0	0	0	0	0	0	0	0	0	0	0	0	0	0	0	0	0	0.0172	0	0	0	0	0	0	0	0
MEAF6	1795	AT	9.2			0	1	0.0443	0.0034	1	1	1	1	1	1	1	1	1	1	1	1	1	1	1	1	1	1	1	1	1	1	1	1	1	1	1	1	1	1	1	0.9828	1	1	1	1	1	1	1	1
MEAF6	1799	ES	7:8.1:9.1	5	9.2	1	0.9345	0.3554	0.0673	0.9209	0.8495	0.7255	0.9191	0.8601	0.859	0.851	0.9045	0.6551	0.8312	0.8724	0.7535	0.827	0.7781	0.9227	0.7449	0.8727	0.9258	0.8682	0.8947	0.8859	0.9056	0.8433	0.7093	0.8114	0.8646	0.7223	0.7793	0.7517	0.8814	0.6071	0.7983	0.8203	0.7082	0.8096	0.8687	0.7834	0.9206	0.7793
MEAF6	1801	ES	8.1:9.1	5	9.2	0	1	0.0854	0.0147	0.9867	0.9913	0.9775	0.9923	0.976	0.9666	0.9693	0.9888	0.9684	0.9345	0.9866	0.9297	0.9893	0.9657	0.9912	0.9689	0.9969	0.9941	0.9704	0.9801	0.9895	0.9893	0.971	0.9564	0.9831	0.9927	0.9366	0.978	0.9658	0.9746	0.9557	0.9818	0.9817	0.9622	0.9628	0.9771	0.974	0.9925	0.9582	0.9968
MEAF6	1802	ES	6	5	7	1	0.8255	0.8853	0.056	0		0	0	0	0	0.0282	0		0.0176		0.0425		0	0.0425			0.0205	0.0973	0	0	0.0185	0	0.0305	0		0	0	0	0.0508	0.0402	0	0	0	0	0	0	0	0.0398	0
MEAF6	1803	ES	06:07:00	5	8.1	0	1	0.4994	0.0229	0	0	0	0	0	0	0.0054	0	0	0.006	0	0.0101	0	0	0.0046	0	0	0.0016	0.022	0	0	0.002	0	0.0032	0	0	0	0	0	0.0107	0.003	0	0	0	0	0	0	0	0.0063	0
MEAF6	1804	ES	7	5	8.1	1	0.9782	0.2986	0.0462	0.1435	0.0496	0.0603	0.085	0.1418	0.1824	0.1621	0.1013	0.0611	0.2684	0.0896	0.1954	0.0521	0.1168	0.1018	0.0927	0.0223	0.0737	0.1792	0.1546	0.0809	0.0995	0.147	0.1027	0.0725	0.0476	0.155	0.0779	0.1032	0.1704	0.068	0.0708	0.0815	0.0913	0.1489	0.1419	0.0912	0.084	0.1398	0.0864
MEAF6	1805	ES	6	5	8.1	0	1	0.9483	0.0407	0	0	0	0	0	0	0	0	0	0.0034	0	0	0	0.0065	0	0	0	0.0014	0	0	0	0.0014	0.0042	0.0014	0.005	0	0	0.002	0	0.0045	0.0027	0	0.0066	0.0033	0.0029	0	0	0	0.0044	0.0085
DNALI1	1806	ES	3	2	4	0	0.8927	0.6084	0.0659	1	0.8919	0.7375	0.9399	0.9648	1	1	1	1		1	1	1	1	0.9319	0.831		1	1	1		1	1	1	1	0.9365	1	1	0.9748	0.9709	1	0.8365	1	1	1		1	1	0.904	0.9113
C1orf109	1814	AP	3.1			0	0.9909	0.4717	0.0887	0.6454	0.8505	1	0.8554	0.842	0.9453	0.9776	0.8356	0.7029	0.8896	0.9647	0.7791	0.9081	0.7931	0.9311	0.9793	0.8264	0.9135	0.7977	0.8912	1	0.9196	0.7319	0.9303	0.8517	0.6596	0.9001	0.8605	0.8369	0.8351	0.7259	0.7707	0.8554	0.8508	0.8535	0.9207	0.7058	0.9479	0.7364	0.8609
C1orf109	1815	AP	1			0	0.9909	0.4717	0.0887	0.3546	0.1495	0	0.1446	0.158	0.0547	0.0224	0.1644	0.2971	0.1104	0.0353	0.2209	0.0919	0.2069	0.0689	0.0207	0.1736	0.0865	0.2023	0.1088	0	0.0804	0.2681	0.0697	0.1483	0.3404	0.0999	0.1395	0.1631	0.1649	0.2741	0.2293	0.1446	0.1492	0.1465	0.0793	0.2942	0.0521	0.2636	0.1391
C1orf109	1816	AA	6.1	5	6.2	0	0.9745	0.2864	0.0487	0	0.0376	0.0656	0	0.0447	0.0553	0.0284	0.0144	0	0.0627		0	0.075	0.0912	0.0356	0	0	0.0139	0.0975	0.0447	0	0.0324	0.042	0.0339	0	0.0202	0.0339	0.0962	0.0324	0.0454	0.06	0.1035	0.1132	0	0	0.0415	0.0627	0.075	0.0797	0.0755
C1orf109	1817	AD	4.3	4.2	5	0	0.9945	0.1171	0.02	1	1	1	1	1	1	1	1	1	1	1	1	1	0.9499	0.9861	1	0.9787	1	1	1	1	1	1	0.9479	1	0.9418	0.9821	0.9884	1	0.9905	1	0.9837	1	0.9834	0.9808	1	0.979	0.9713	1	0.9844
C1orf109	1818	AA	4.1	3.3	4.2	1	0.8509	0.6595	0.1163		0.244		0.3056	0.2875	0.244	0.3262	0.2714		0.4536		0.244	0.1623	0.2342	0.1326	0.2933	0.3923	0.3562	0.244	0	0.3262	0.1441		0.0809	0.1856	0.4296	0.3262	0.2748	0.244	0.244	0.492	0.3086	0.4365	0.5636	0.244		0.4466	0.0693	0.4085
C1orf109	1819	ES	3.3:4.1	3.2	4.2	0	0.9	0.6109	0.1282	0.6019	1		0.8037	0.9296	0.9128	0.9325	0.8477	0.7724	0.882		0.912	0.8581	1	0.6204	0.8416	0.8336	0.818	0.5644		0.9298	0.8704	0.8848	0.6382	0.7458	0.9202	0.8344	0.8684	0.7641	0.9081	1	0.9599	1	0.898	0.8996		0.9401		0.8841	0.9067
CDCA8	1821	RI	1.2	1.1	1.3	0	0.96	0.755	0.0964	1	0.959		0.6784	0.5859	0.6257	0.7626	0.7682	0.6784	0.7999	0.5434	0.7858	0.5616	0.8027	0.7988	0.872	0.4765	0.6663	0.6771	0.8572	0.6607	0.7915	0.73	0.8823	0.883	0.7409	0.7983	0.8074	0.9193	0.7534	0.8446	0.8129	0.8364	0.8287	0.8409	0.745	0.7423	0.6993	0.9103	0.6927
EPHA10	1825	AT	21			0	0.9945	0.3275	0.0577	0	0	0	0.1431	0	0	0	0	0	0	0	0	0	0	0	0	0	0	0	0	0	0	0.1887	0	0	0	0	0	0	0.0584	0	0	0	0	0	0	0	0	0.1443	0
EPHA10	1826	AT	3.2			0	0.9945	0.3275	0.0577	1	1	1	0.8569	1	1	1	1	1	1	1	1	1	1	1	1	1	1	1	1	1	1	0.8113	1	1	1	1	1	1	0.9416	1	1	1	1	1	1	1	1	0.8557	1
EPHA10	1828	RI	19.3	19.2	19.4	0	0.9	0.0358	0.0026	1	1	1	1	0.977	1	1	1	1		1	1	1	1	1	1	1	1	1	1	1	1	1	1	1		1	1	1	1	1	1	1	1	1		1	1	1	1
EPHA10	1829	RI	19.2:19.3	19.1	19.4	0	0.9	0.226	0.0107	1	1	1	1	1	1	1	1	1		1	1	1	1	1	1	1	1	1	1	1	1	1	1	1		1	1	1	1	1	1	1	1	1		1	1	1	1
MANEAL	1833	AP	1			0	0.9727	0.3753	0.027	1	0.9535		1	1	1	1	1	1	0.6754	1	1	1	1	1	1	1	1	1	1	1	1	1	1	1	1	0.9896	1	0.9729	1	0.6247	1	1	1	1		1	1	0.955	1
MANEAL	1834	AP	2.1			0	0.9727	0.3753	0.027	0	0.0465		0	0	0	0	0	0	0.3246	0	0	0	0	0	0	0	0	0	0	0	0	0	0	0	0	0.0104	0	0.0271	0	0.3753	0	0	0	0		0	0	0.045	0
MANEAL	1835	AA	4.1	3	4.2	0	0.9527	0.7904	0.119		0.8299	0.7495	0.6931	0.8747	0.5287	0.7267	0.6906	0.7845		0.6233	0.7665	0.6908	0.5865	0.8458	0.6342	0.6824	0.6299	0.4837	0.8821	0.7224	0.7178	0.7328	0.6664	0.8213	0.7009	0.7053	0.6806	0.798	0.787		0.7501	0.789	0.7097	0.7058		0.7085	0.3202	0.8253	0.8661
MANEAL	1836	ES	3	2.3	4.1	0	0.8145	0.3695	0.0661		0.8829		0.9356	1		1	0.9411	1		1	0.9445	0.9683	0.8368	1	0.94	0.8737	0.9445	0.8376	0.9196	0.9426	1		0.9038	1	0.9727	0.8806	0.9683	0.9807	0.9753		0.957	1	0.836	0.9481		0.8151	0.7921	1	0.9311
C1orf122	1841	RI	1.2:1.3	1.1	1.4	0	0.9818	0.1486	0.0176	0	0		0	0.0503	0	0.0086	0.0092	0	0.0071	0.0204	0.0266	0	0.0258	0.0082	0	0.009	0.0019	0	0.0783	0.0036	0.0038	0.0253	0.0049	0.0166	0.0051	0.0134	0.0318	0.0324	0.0078	0	0.005	0	0.0112	0.0053	0.0331	0.0114	0	0.0043	0.0034
C1orf122	1842	AD	1.2	1.1	1.4	0	0.9818	0.1578	0.0242	0.0249	0		0.033	0	0.0088	0	0.0129	0	0.01	0.0284	0.0369	0	0.0182	0.0039	0	0.0126	0.0027	0	0.0486	0.0345	0.0408	0.0284	0.027	0.0094	0.0315	0.0065	0.0124	0.0365	0.0269	0.0289	0.0071	0.0205	0.0095	0	0.0569	0	0	0.0293	0.0326
INPP5B	1848	AT	7.3			0	1	0.2618	0.034	0.089	0.1138	0.0827	0.0803	0.1179	0.1017	0.0873	0.0778	0.1008	0.1216	0.0674	0.0844	0.0555	0.1305	0.0742	0.0745	0.1112	0.0678	0.0882	0.0965	0.0951	0.0808	0.1127	0.0912	0.0923	0.079	0.0687	0.1	0.1163	0.108	0.2748	0.1241	0.0694	0.0779	0.0543	0.0977	0.0763	0.1314	0.0706	0.0875
INPP5B	1849	AT	24			0	1	0.2618	0.034	0.911	0.8862	0.9173	0.9197	0.8821	0.8983	0.9127	0.9222	0.8992	0.8784	0.9326	0.9156	0.9445	0.8695	0.9258	0.9255	0.8888	0.9322	0.9118	0.9035	0.9049	0.9192	0.8873	0.9088	0.9077	0.921	0.9313	0.9	0.8837	0.892	0.7252	0.8759	0.9306	0.9221	0.9457	0.9023	0.9237	0.8686	0.9294	0.9125
INPP5B	1850	AA	16.1	15	16.2	0	0.9255	0.7056	0.1057	0.2011	0.1106		0.0246	0.1184	0.0422	0.2386	0.2997	0.2091	0.1051		0.2872	0.0659	0.0932	0.1413	0.1051	0.0877	0.0406	0.5451	0.2133	0	0.0602	0.4135	0.1498	0.2427	0.1281	0.1158	0.2213	0.3565	0.3026	0.3459	0.0878		0		0.128	0.1051	0.1354	0.1407	0.1288
INPP5B	1851	ES	13	12	14	0	0.9909	0.1558	0.0137	1	1	1	1	1	1	1	0.9751	1	1	1	1	1	1	1	1	1	1	1	1	1	1	1	1	1	0.9753	0.9854	0.989	1	0.9839	1	1	1	1	1	1	0.9713	1	1	1
INPP5B	1852	AD	7.2	7.1	8	0	0.8582	0.8738	0.228		0.7688	0.4924		0.8781		0.5408	1		1		0.8644	1	0.6394	0.5129	0.3566	1	1	0.3566	0.7688	0.5964		0.4924	0.7348	0.8693	0.4325	0.9287	0.6195	0.753	0.47		0.7128		0.8061		1	0.2936	0.6244	0.3631	0.4419
SF3A3	1853	ES	03:04:00	2	5	0	1	0.0697	0.0109	0.99	0.9894	0.9677	0.9867	0.991	0.985	0.9926	0.9962	0.9798	0.989	0.9918	0.9956	0.996	0.9852	0.9937	0.9765	0.9945	0.9914	0.9826	1	0.9948	1	1	0.9919	0.969	0.9935	0.9614	0.9866	0.9882	0.9904	0.9835	0.9902	1	0.9842	0.9945	0.941	0.9649	0.9948	0.9754	0.9788
UTP11L	1854	ES	6	5	7	0	1	0.0448	0.0044	1	1	0.9937	0.9954	0.9974	0.9961	1	1	1	1	1	0.9963	0.9928	0.9831	0.9957	1	1	1	0.9976	1	0.9973	1	0.9963	0.9965	1	0.9881	0.9938	0.9991	0.9838	1	1	0.9973	0.9936	1	1	1	0.9896	1	0.9956	0.9977
GJA9	1857	AT	2.3			0	0.8745	0.4285	0.0916	0	0.0704			0.2	0	0.0887	0.1615	0.033	0		0.1243	0.102	0.3025	0.0785		0	0.0186	0.0238	0.1658	0.2542	0.1756	0.0887	0.102	0.0426	0.102	0.102	0.2142	0.1074	0.3163	0.2036	0.2288	0.0352			0.0407	0.0928	0.0464	0.0829	0.0538
GJA9	1858	AT	7			0	0.8745	0.4285	0.0916	1	0.9296			0.8	1	0.9113	0.8385	0.967	1		0.8757	0.898	0.6975	0.9215		1	0.9814	0.9762	0.8342	0.7458	0.8244	0.9113	0.898	0.9574	0.898	0.898	0.7858	0.8926	0.6837	0.7964	0.7712	0.9648			0.9593	0.9072	0.9536	0.9171	0.9463
RHBDL2	1859	AP	1			0	0.9982	0.9592	0.1934	0.8699	0.7572	0.3619	0.7501	0.7979	0.8753	0.9162	0.8943	0.8751	0.811	0.8739	0.3037	0.5314	0.5807	0.8729		0.918	0.8458	0.7853	0.624	0.7996	0.5521	0.5416	0.8798	0.9256	0.9445	0.5551	0.598	0.6193	0.7672	0.5068	0.718	0.9589	0.6734	0.7205	0.8582	0.8318	0.8347	0.911	0.8418
RHBDL2	1860	AP	3			0	0.9982	0.9592	0.19	0.1301	0.2428	0.6381	0.2499	0.2021	0.1247	0.0758	0.1057	0.1249	0.189	0.1261	0.6963	0.4686	0.4193	0.1271		0.082	0.1542	0.2147	0.376	0.2004	0.4479	0.4584	0.1202	0.0744	0.0555	0.4449	0.402	0.3807	0.2328	0.4213	0.282	0.0411	0.3266	0.2795	0.1418	0.1682	0.1653	0.089	0.1582
RHBDL2	1861	AP	2			0	0.9982	0.4809	0.0277	0	0	0	0	0	0	0.0081	0	0	0	0	0	0	0	0		0	0	0	0	0	0	0	0	0	0	0	0	0	0	0.072	0	0	0	0	0	0	0	0	0
RHBDL2	1862	AT	5.2			0	1	0.32	0.0333	0	0	0	0	0.0305	0	0	0.0248	0	0.0115	0	0.1731	0	0.0958	0.0133	0	0	0.0152	0	0.0183	0	0	0	0	0	0	0	0.0105	0.0122	0.0389	0.0168	0.0699	0.0028	0	0	0	0	0.0111	0	0.0406
RHBDL2	1863	AT	10			0	1	0.32	0.0333	1	1	1	1	0.9695	1	1	0.9752	1	0.9885	1	0.8269	1	0.9042	0.9867	1	1	0.9848	1	0.9817	1	1	1	1	1	1	1	0.9895	0.9878	0.9611	0.9832	0.9301	0.9972	1	1	1	1	0.9889	1	0.9594
AKIRIN1	1864	ES	3	2	4	0	1	0.1195	0.0105	0.9853	0.967	1	1	0.9936	0.9723	0.9854	0.9864	0.98	1	0.991	0.9882	0.9934	1	0.9737	0.9782	1	0.9923	0.9888	0.9803	0.9817	0.9944	0.9956	0.9866	1	0.9897	0.9811	0.9921	0.9874	0.9947	0.9925	0.9894	1	0.9877	1	0.9884	0.9585	0.9846	0.9931	0.9853
AKIRIN1	1866	ES	2	1	3	0	1	0.0207	0.0027	1	1	1	1	1	1	1	1	1	1	0.9866	1	1	1	1	0.983	1	1	1	1	1	1	1	1	1	1	1	0.9982	1	0.9925	1	1	1	1	1	1	0.9914	0.9948	0.9917	1
NDUFS5	1869	AD	1.2	1.1	2	0	1	0.6013	0.171	0.3804	0.0143	0.4061	0.3227	0.5353	0.5836	0.564	0.5534	0.2379	0.5485	0.5224	0.5535	0.5731	0.0154	0.276	0.5502	0.5309	0.5452	0.105	0.5119	0.5622	0.5475	0.1733	0.5477	0.2748	0.3465	0.5494	0.5279	0.0133	0.5463	0.4593	0.535	0.5265	0.5263	0.5016	0.5469	0.4463	0.6058	0.524	0.535
MACF1	1877	AT	109			0	1	0.0272	0.0021	0.9991	0.9993	1	0.9973	0.9948	0.9977	0.9992	0.999	0.9991	0.9968	1	0.9987	0.9972	0.9973	0.9997	0.9985	0.9977	0.9994	0.9997	1	0.9929	0.9993	0.9984	0.9975	0.9992	0.9971	1	0.9988	0.9981	0.9932	0.9838	0.996	0.9948	0.998	0.9996	0.9996	1	0.9967	0.9995	0.9985
MACF1	1879	AT	4			0	1	0.0272	0.0019	0.0009	0.0007	0	0.0027	0	0.0023	0.0008	0.001	0.0009	0.0016	0	0.0013	0.0028	0.0003	0.0003	0.0015	0.0023	0.0006	0.0003	0	0.0071	0.0007	0.0011	0.0019	0.0008	0.002	0	0.0007	0.0019	0.0068	0.0107	0.004	0.0052	0.002	0.0004	0	0	0.0025	0.0005	0.0015
MACF1	1880	AT	12.2			0	1	0.0095	0.0008	0	0	0	0	0.0052	0	0	0	0	0.0016	0	0	0	0.0024	0	0	0	0	0	0	0	0	0.0005	0.0007	0	0.001	0	0.0005	0	0	0.0055	0	0	0	0	0.0004	0	0.0008	0	0
MACF1	1881	ES	107	106	108	0	1	0.7871	0.1445	0.4493	0.6481	0.6698	0.3922	0.3546	0.5864	0.7731	0.6445	0.6749	0.5532	0.4321	0.5676	0.514	0.3297	0.6951	0.4271	0.4918	0.7594	0.5092	0.485	0.6781	0.8991	0.5188	0.6457	0.5	0.4462	0.5842	0.6248	0.5426	0.641	0.5253	0.5151	0.5989	0.4152	0.6048	0.6838	0.5956	0.7285	0.468	0.537
MACF1	1882	ES	105	104	106	0	1	0.0235	0.0027	0	0	0	0	0.0148	0	0	0	0	0	0	0.0098	0	0.0147	0	0.0156	0	0	0	0	0	0	0	0	0	0	0	0.0038	0	0	0	0.0022	0	0	0	0	0	0.0055	0	0
MACF1	1883	ES	103	102	104	0	1	0.7691	0.1138	0.7874	0.7798	0.7269	0.715	0.643	0.6804	0.8479	0.7901	0.7814	0.5645	0.5918	0.5444	0.7032	0.6196	0.7384	0.6871	0.7124	0.8952	0.6412	0.6078	0.7895	0.8125	0.6738	0.8035	0.8338	0.8116	0.6765	0.6132	0.5684	0.6494	0.8541	0.5365	0.5357	0.7495	0.5684	0.6975	0.5111	0.9608	0.6058	0.6963
MACF1	1885	ES	77	76.1	79	0	0.9673	0.306	0.0442		1	1	1	1	0.9093	0.9011	1	0.9318	0.9382	1	1		1	1	0.9393	0.9525	0.9817	1	1	0.9811		1	1	0.8644	0.9866	0.9719	0.9726	0.9273	1	0.9273	0.9823		1	1	1	1	1	0.9329	0.914
MACF1	1886	ES	69	68	70	0	0.9982	0.0978	0.0058	1	1	1	1	1	1	1	1	1	1	1	1	1	1	1	1	1	1	1	1	1	1	1	1	1	1	1	1	1	1	1	1	1	1	1	1	1	0.9763	0.9862	1
MACF1	1887	ES	59	58	60	0	0.8855	0.6156	0.1315		1	0.8853	0.8769	0.8558					0.8132		0.8853		0.9047	0.5428	1	1	0.8769	1	0.8926	1		0.8318	1		1	1	1	0.5807	1	1	0.8526		0.9369	0.8672	1	0.7655	0.8166	0.7622	0.5974
MACF1	1888	ES	43.2:44:45:46:47	42	48	0	0.9255	1	0.2798	0.0238	0.1289	0.0928	0.2597	0.1257					0.4021		0.033		0.1125	0.0574	1	0.1059	0.1012	0.0796	0.1201	0.0697		0.2291	0.1163		0.0406	0.0707	0.0976	0.0988	0.1716	0.283	0.1397		0.0165	1	0.0182	1	0.0366	0.1687	1
MACF1	1889	ES	29	28	30	0	0.8673	0.4723	0.0309		1		1	1		1			1		1		1	1	1	1	1	1		1		1	1		1	1	1		1	1	1		1		1	1	1	1	1
PABPC4	1893	ES	11	10.2	12	0	1	0.2944	0.0415	0.8819	0.7978	0.8301	0.9485	0.8634	0.8539	0.8002	0.9355	0.8204	0.8496	0.9187	0.9026	0.9283	0.8939	0.9339	0.881	0.9291	0.9531	0.9412	0.9256	0.906	0.9756	0.9038	0.9276	0.9605	0.9079	0.9496	0.9585	0.8825	0.9044	0.9405	0.9654	0.971	0.9632	0.958	0.9522	0.9419	0.8514	0.9429	0.9487
PABPC4	1894	ES	10.2:11	10.1	12	0	1	0.1559	0.0189	1	0.9426	1	0.9712	0.954	0.9558	0.9542	0.981	0.9892	0.9658	0.988	0.9472	0.9797	0.9665	0.9837	0.9	0.9967	0.979	0.983	0.9457	0.9686	0.9765	0.9643	0.9571	0.9914	0.9765	0.9863	0.9831	0.9614	0.9587	0.9889	0.956	0.9862	0.9854	0.9888	0.9822	0.9656	0.9375	0.9671	0.985
PABPC4	1895	ES	11	10.1	12	0	1	0.551	0.0463	1	0.8355	1	0.9539	0.9182	0.9205	0.8312	0.9627	0.9621	0.9113	0.9675	0.9185	0.9689	0.9423	0.9513	0.8257	0.9912	0.9527	0.9601	0.8861	0.9421	0.9538	0.9347	0.9055	0.9799	0.965	0.9666	0.9635	0.917	0.8988	0.9509	0.942	0.9586	0.9786	0.9677	0.9629	0.953	0.8525	0.9212	0.9748
PABPC4	1896	AD	10.2	10.1	12	0	0.9927	0.5247	0.0833	1	0.8356	1	0.6707	0.7937	0.8168	0.8627	0.807	0.9592	0.8577	0.8928	0.6828	0.8158	0.8019	0.8372	0.5854	0.9641	0.7301	0.8056	0.606	0.7894	0.5702	0.7733	0.6683	0.8468	0.8319	0.812	0.7513	0.7961	0.7474	0.87	0.4753	0.715	0.7481	0.8228	0.7785	0.6712	0.7578	0.6783	0.8089
PABPC4	1897	AD	10.2	10.1	11	0	1	0.3305	0.0537	0.7455	0.7681	0.8217	0.6247	0.6595	0.6671	0.8155	0.6781	0.7886	0.7421	0.7352	0.6234	0.6227	0.6532	0.7646	0.6608	0.7378	0.7089	0.7117	0.6923	0.6614	0.6783	0.6644	0.7114	0.7112	0.6166	0.72	0.6986	0.7021	0.7335	0.8256	0.5861	0.765	0.6078	0.7569	0.6983	0.594	0.7338	0.7204	0.6434
HEYL	1898	AP	1			0	0.8364	0.8362	0.1713		0.3771		0.6449	0.3527	1	1	0.7974	0.3771		0.6021	0.7841		0.6247	0.8519			0.3527	0.5477		1		0.8945	0.7077	0.5022	0.5432	0.5414	0.5855	0.8034	0.6138	0.6247	0.7056		0.8373	1	0.8075	0.6942	0.769	0.6242	0.7351
HEYL	1899	AP	2			0	0.8364	0.8362	0.1713		0.6229		0.3551	0.6473	0	0	0.2026	0.6229		0.3979	0.2159		0.3753	0.1481			0.6473	0.4523		0		0.1055	0.2923	0.4978	0.4568	0.4586	0.4145	0.1966	0.3862	0.3753	0.2944		0.1627	0	0.1925	0.3058	0.231	0.3758	0.2649
PPIE	1900	AT	9.2			0	1	0.0308	0.0047	0	0.0161	0	0	0.0017	0	0.0008	0.0033	0.0034	0.0143	0	0.0069	0	0.0297	0.0044	0	0.0035	0.006	0.0092	0.0067	0.0016	0.0014	0.0134	0.0057	0.0052	0.0093	0.002	0.0197	0.0117	0.0104	0.0057	0.0119	0.0017	0.0019	0.003	0.0158	0	0.0144	0.0068	0.0086
PPIE	1901	AT	10			0	1	0.3369	0.0621	0.843	0.781	0.9663	0.9239	0.8723	0.9087	0.9417	0.9356	0.9023	0.7452	0.9542	0.914	0.8942	0.8296	0.9079	0.9595	0.9552	0.8258	0.8651	0.8683	0.8642	0.9066	0.8242	0.9318	0.8375	0.8481	0.8689	0.7899	0.8081	0.857	0.839	0.8981	0.9466	0.8641	0.9455	0.8324	0.8623	0.8756	0.7997	0.8603
PPIE	1902	AT	12			0	1	0.3316	0.0609	0.157	0.2028	0.0337	0.0761	0.1261	0.0913	0.0575	0.0611	0.0943	0.2404	0.0458	0.0791	0.1058	0.1407	0.0878	0.0405	0.0413	0.1683	0.1257	0.125	0.1342	0.092	0.1624	0.0625	0.1573	0.1426	0.1291	0.1904	0.1802	0.1325	0.1552	0.09	0.0518	0.134	0.0515	0.1518	0.1377	0.11	0.1935	0.1311
PPIE	1903	ES	11	9.1	12	0	1	0.8031	0.1262	0.5865	0.6696	0.4477	0.4739	0.6664	0.4477	0.7394	0.5033	0.4739	0.7086	0.8851	0.6281	0.3028	0.6052	0.6281	0.6459	0.3426	0.6185	0.6903	0.6243	0.6509	0.7217	0.6564	0.4611	0.6216	0.2502	0.6105	0.6541	0.7616	0.5316	0.7762	0.3718	0.3827	0.2745	0.4149	0.5967	0.4079	0.595	0.6466	0.5717
PPIE	1904	AD	7.2	7.1	8	0	1	0.5657	0.1014	0.0759	0.2248	0.0198	0.0197	0.0274	0.0173	0.0265	0.0262	0.0199	0.2809	0.0093	0.0887	0.054	0.3604	0.1163	0.007	0.0355	0.1043	0.0634	0.0652	0.1081	0.1718	0.0484	0.046	0.1097	0.1319	0.0143	0.106	0.2183	0.053	0.1631	0.0447	0.017	0.017	0.0126	0.056	0.0347	0.1919	0.0359	0.1541
PPIE	1905	ES	7.1:7.2	6	8	0	1	0.9154	0.1791	1	1	1	0.3261	0.6979	0.7421	0.5302	1	1	1	0.407	0.8933	1	0.9657	0.9099	0.0846	0.4527	0.934	1	0.7292	0.737	0.8384	0.6549	0.8062	0.9517	1	0.2743	0.7667	1	0.8218	1	0.6682	1	0.3976	0.6489	0.5042	0.6717	1	0.6066	0.8988
PPIE	1906	ES	7.1	6	8	0	1	0.0369	0.0067	1	1	1	0.9856	0.9951	0.9967	0.9899	1	1	1	0.9938	0.9948	1	0.9909	0.9937	0.9631	0.9822	0.9966	1	0.9871	0.9815	0.9797	0.987	0.9952	0.9968	1	0.9819	0.9855	1	0.9938	1	0.99	1	0.9861	0.9969	0.977	0.9917	1	0.9898	0.9896
PPIE	1907	AD	4.2	4.1	5	0	1	0.0885	0.0136	0.0255	0.0252	0.0053	0.0091	0.0103	0.0084	0.0149	0.0062	0.0049	0.0191	0	0.0124	0.0072	0.0099	0.0238	0	0.0208	0.0106	0.0459	0.0234	0.0172	0.0108	0.0532	0.0143	0.0279	0.0122	0.0106	0.0344	0.0399	0.0169	0.0037	0.0336	0.0217	0.0057	0.0074	0.0257	0.0183	0.0297	0.0369	0.0167
PPIE	1909	ES	00:04:01.100000	2	6	0	1	0.0169	0.002	1	1	1	1	1	1	1	1	1	1	0.9929	1	1	1	1	1	1	1	1	0.9873	1	1	0.9962	1	1	1	1	1	0.9971	1	1	0.994	1	0.9936	1	1	1	1	1	1
PPIE	1910	AD	1.2	1.1	2	0	1	0.4023	0.0598	0.8529	0.9031	0.8253	0.7756	0.8435	0.8587	0.8703	0.8507	0.7849	0.836	0.8154	0.8091	0.8698	0.7358	0.8063	0.8039	0.7783	0.7787	0.8453	0.8466	0.873	0.7266	0.782	0.7484	0.8581	0.8539	0.8537	0.7586	0.7302	0.8745	0.8957	0.8652	0.8429	0.8649	0.8973	0.7406	0.8558	0.9032	0.8462	0.8102
BMP8B	1911	AT	6.2			0	1	0.6401	0.1344	0.3504	0.333	0	0.0486	0.2082	0.0288	0.2269	0.2383	0.1883	0.4519	0.1729	0.0634	0.3522	0.4229	0.044	0.0432	0.0378	0.0565	0.1966	0.1362	0.1778	0.6255	0.1133	0.1513	0.1767	0.0456	0.1408	0.3528	0.2862	0.2615	0.1185	0.0179	0.2333	0.042	0.0426	0.44	0.419	0.0931	0.2109	0.3302
BMP8B	1912	AT	8			0	1	0.6401	0.1344	0.6496	0.667	1	0.9514	0.7918	0.9712	0.7731	0.7617	0.8117	0.5481	0.8271	0.9366	0.6478	0.5771	0.956	0.9568	0.9622	0.9435	0.8034	0.8638	0.8222	0.3745	0.8867	0.8487	0.8233	0.9544	0.8592	0.6472	0.7138	0.7385	0.8815	0.9821	0.7667	0.958	0.9574	0.56	0.581	0.9069	0.7891	0.6698
TRIT1	1913	AT	12			0	1	0.0991	0.0146	1	0.9936	0.9889	0.9421	0.9648	0.9775	0.9983	0.9944	0.9966	0.9924	1	0.9913	1	0.9731	0.9854	1	1	0.9931	0.9837	0.9893	0.9983	0.9915	0.9956	0.9901	0.9924	0.9928	0.9957	0.988	0.9956	0.9857	0.9919	0.9937	1	0.9903	1	0.9843	0.9928	0.9919	0.9875	0.9849
TRIT1	1914	AT	5			0	1	0.0991	0.0146	0	0.0064	0.0111	0.0579	0.0352	0.0225	0.0017	0.0056	0.0034	0.0076	0	0.0087	0	0.0269	0.0146	0	0	0.0069	0.0163	0.0107	0.0017	0.0085	0.0044	0.0099	0.0076	0.0072	0.0043	0.012	0.0044	0.0143	0.0081	0.0063	0	0.0097	0	0.0157	0.0072	0.0081	0.0125	0.0151
TRIT1	1916	ES	10	9	11	0	1	0.0277	0.0027	1	1	1	1	1	1	1	1	1	1	1	1	1	1	1	1	1	1	1	1	1	1	1	1	1	1	1	0.9974	1	1	1	1	1	1	1	1	1	1	1	1
TRIT1	1918	ES	9	8	10	0	1	0.0631	0.0086	1	0.9772	1	1	1	1	1	1	1	1	1	1	1	1	0.9936	0.9691	1	0.9944	0.9862	1	1	1	0.9867	0.9943	0.9926	1	1	1	0.9932	0.9889	1	1	1	1	1	0.987	1	1	1	1
TRIT1	1920	ES	8	7.2	9	0	1	0.1563	0.0147	0.966	1	1	0.9573	0.9804	0.9823	0.9938	1	0.9726	0.9914	1	1	0.9911	1	0.986	1	1	0.994	1	1	0.9932	1	0.9846	0.9928	0.9917	0.9935	1	0.9931	1	1	1	0.9928	1	1	1	1	1	0.9757	0.9887	0.9694
TRIT1	1921	AA	7.1	6.2	7.2	0	0.9927	0.1337	0.0225	1	0.9669	1	1	1	0.9597	1	0.9869	1	0.9783	1	0.9837	0.9737	1	0.9728	1	0.9845	0.9887	0.9585	0.9698	1	0.9557	1	0.9658	1	1	1	0.9643	0.9522	0.9885	0.9721	0.9675	1	0.9651	0.983	0.9594	0.9709	0.8994	0.9779	0.9812
TRIT1	1922	AD	6.2	6.1	7.1	0	0.9945	0.5111	0.0785	0.8647	0.9293	0.8241	0.9283	0.921	0.9096	0.92	0.815	0.8961	0.8719	1	0.8739	0.9189	0.8398	0.7849	1	0.8318	0.8622	0.9291	0.844	0.8742	0.8957	0.8779	0.7926	0.7585	0.8846	0.845	0.8185	0.8502	0.8983	0.9305	0.8675	0.9257	0.9087	0.9799	0.8844	0.9403	0.8029	0.8775	0.8543
TRIT1	1923	ES	4	3.1	6.1	0	1	0.2643	0.0494	0.9302	0.9292	0.8833	0.9545	0.9385	0.7461	0.9429	0.9168	0.953	0.9083	0.8294	0.8996	0.9402	0.8228	0.8976	0.942	0.8667	0.9319	0.8888	0.9212	0.8499	0.8747	0.8252	0.9056	0.9133	0.9117	0.8868	0.9218	0.9108	0.9414	0.9754	0.8499	0.975	0.8254	0.9248	0.8462	0.9484	1	0.9349	0.9159
TRIT1	1924	ES	2:3.1:4:6.1:6.2	1	7.1	0	1	0.1631	0.0242	0.9205	0.9557	1	0.9619	0.9801	0.9596	0.9649	0.9745	1	0.9827	1	0.9587	0.9866	0.979	0.9526	1	0.9838	0.9901	0.9752	1	0.9742	0.9887	0.9834	0.9882	0.9844	1	0.963	0.9733	1	1	1	0.8991	1	0.983	1	0.964	1	0.9791	0.9677	0.9482
TRIT1	1926	ES	2:3.1:6.1:6.2	1	7.1	0	0.9145	0.6667	0.1273	0.5869	0.7104	1	0.7268	0.8364	0.9296	0.7279	0.862	1	0.9014	1	0.8138	0.8859	0.9421	0.848	1	0.9408	0.9281	0.8628	1	0.9035	0.9401	0.9497	0.939	0.907	1	0.8372	0.8563	1	1		0.7538	1	0.957	1	0.8922	1		0.7935	0.7072
TRIT1	1928	ES	2:3.1:4:6.1	1	7.1	0	0.9836	0.7668	0.1266	0.6586	0.6408	1	0.6605	0.8256	0.713	0.7237	0.903	1	0.8948		0.775	0.8713	0.9	0.8524		0.9323	0.9456	0.7637	1	0.8552	0.9172	0.8886	0.9596	0.962	1	0.8364	0.9016	1	1	1	0.5861	1	0.8805	1	0.7811	1	0.9319	0.8211	0.7864
TRIT1	1932	ES	2:3.1:4:6.1:6.2:7.1:7.2:8:9	1	10	0	1	0.1274	0.0153	1	0.9872	1	1	1	1	0.9923	1	1	1	1	1	1	1	1	1	0.9859	0.9915	1	1	1	0.9906	0.987	0.9797	0.9932	1	0.975	0.9887	0.9884	1	1	0.9463	0.9434	0.9847	1	1	0.982	0.9824	1	1
TRIT1	1934	ES	2:3.1:6.1:6.2:7.1:7.2:8:9	1	10	0	0.9473	0.5619	0.0923	1	0.9019	1	1	1	1	0.9281	1	1	1	1	1	1	1	1	1	0.9497	0.9396	1	1	1	0.9517	0.9625	0.9021	0.9591	1	0.8873	0.937	0.9479	1	1	0.8617	0.4498	0.9623	1	1	0.839		1	1
TRIT1	1936	ES	2:3.1:4:6.1:7.1:7.2:8:9	1	10	0	0.9836	0.5332	0.0743	1	0.8649	1	1	1	1	0.9244	1	1	1		1	1	1	1		0.9409	0.9529	1	1	1	0.9305	0.9108	0.9322	0.9833	1	0.8845	0.9565	0.9412	1	1	0.7369	0.5992	0.892	1	1	0.7793	0.9423	1	1
TRIT1	1971	ES	00:02:03.100000	1	4	0	1	0.1669	0.0209	0.9101	0.9809	1	0.9409	1	1	1	0.9732	1	0.9603	0.9087	0.9426	0.9493	0.9595	0.9824	1	1	0.9764	1	1	1	1	1	1	0.9843	0.9867	0.9502	0.9749	1	0.9502	0.9243	0.9824	1	0.9593	1	0.9643	1	0.9799	1	0.9576
TRIT1	1972	ES	00:03:01.100000	1	6.1	0	1	0.1721	0.0286	0.9743	0.9531	0.9789	0.9109	0.9788	1	0.982	0.9667	1	0.9828	0.9124	1	0.9862	0.9587	0.9721	1	0.9701	0.9535	1	1	1	0.9892	1	0.98	0.9626	0.9897	0.9734	0.9818	1	0.9823	0.8937	0.9329	1	0.9529	0.9838	0.9675	0.9772	1	1	0.966
TRIT1	1974	ES	00:02:03.100000	1	6.1	0	0.8982	0.8017	0.1395	0.82	0.6871	0.9204	0.4988	0.8201	1	0.8371	0.8218	1	0.898	0.7264	1	0.878	0.8853	0.903	1	0.8906	0.718	1	1	1	0.9407	1	0.897	0.7918	0.9501	0.8743	0.8935	1	0.8412	0.2532	0.8236		0.8834	0.8855	0.9001	0.7901		1	0.7809
MYCL	1975	AT	2			0	1	0.5534	0.0792	0.9667	0.9526	0.944	0.8854	0.9088	0.9832	0.9156	0.8954	0.8604	0.9598	0.9537	0.8808	0.9208	0.886	0.8383	0.8878	0.9821	0.8978	0.9004	0.7927	0.8632	0.9259	0.8891	0.8966	0.8954	0.9222	0.932	0.9594	0.8061	0.7613	0.8003	0.8892	0.9609	0.8749	0.9004	0.9157	0.9541	0.9371	0.93	0.9498
MYCL	1976	AT	1.4			0	1	0.5534	0.0792	0.0333	0.0474	0.056	0.1146	0.0912	0.0168	0.0844	0.1046	0.1396	0.0402	0.0463	0.1192	0.0792	0.114	0.1617	0.1122	0.0179	0.1022	0.0996	0.2073	0.1368	0.0741	0.1109	0.1034	0.1046	0.0778	0.068	0.0406	0.1939	0.2387	0.1997	0.1108	0.0391	0.1251	0.0996	0.0843	0.0459	0.0629	0.07	0.0502
MYCL	1977	RI	1.2	1.1	1.3	0	0.8891	0.8321	0.167		0.724		0.5577	0.5566	0.5022	0.4177	0.7077	0.7077	0.724		0.6844		0.7557	0.6449		0.6894	0.6548	0.4466		1	0.7516	0.4433	0.5527	0.6395	0.4665	0.5855	0.6539	0.4139	0.73	0.5766	0.7206	0.561	0.6301	0.6686	0.4121		0.6686	0.6014	1
MFSD2A	1978	AA	3.1	2	3.2	0	0.92	0.2573	0.0226		0		0.0724	0.0356	0.0154	0.0319	0	0	0.0194		0	0.0724	0	0			0	0	0	0.0376	0	0.0095	0.0324	0	0	0	0.0075	0.0296	0	0.1494	0.0132	0	0	0	0	0	0.0706	0	0
MFSD2A	1980	ES	00:02:03.200000	1	4	0	0.9964	0.1154	0.009	1	1	1	1	1	1	1	1	1	0.9923	1	1	1	0.9769	1	1	1	0.9882	1	1	1	1	0.9939	1	1	1	1	0.9951	1	0.8846	1	1	1	1	1	1	1	1	1	0.9933
CAP1	1981	AA	3.1	2.2	3.2	0	1	0.1511	0.0194	0.9384	0.9223	0.9071	0.9029	0.9281	0.932	0.9522	0.8985	0.915	0.9013	0.902	0.8891	0.9385	0.911	0.9138	0.8873	0.9088	0.8981	0.914	0.9199	0.8959	0.935	0.9103	0.9237	0.9056	0.8957	0.9089	0.9016	0.9157	0.9081	0.8934	0.9277	0.9068	0.8903	0.9208	0.8876	0.9388	0.9227	0.9124	0.8921
CAP1	1982	AA	2.1	1.2	2.2	0	1	0.3084	0.0353	0.2491	0.3131	0.2708	0.2516	0.2628	0.257	0.2623	0.2558	0.2485	0.2101	0.2481	0.2281	0.2829	0.254	0.3084	0.3126	0.1914	0.2456	0.1812	0.2199	0.2206	0.271	0.2393	0.2847	0.2783	0.1924	0.2427	0.1782	0.1679	0.2723	0.2539	0.2804	0.2861	0.2462	0.2963	0.262	0.2943	0.2524	0.2356	0.287
CAP1	1983	AD	1.2	1.1	2.1	0	0.9982	0.4819	0.0606	0.6809	0.7762	0.7832	0.8268	0.6642	0.7189	0.7345	0.6599	0.7615	0.647	0.7246	0.7044	0.8076	0.684	0.7182	0.7815	0.7826	0.6936	0.6474	0.785	0.6721	0.639	0.737	0.7856	0.7288	0.6278	0.7349	0.5987	0.6011	0.8006	0.6102	0.7099	0.65	0.7653	0.7368	0.6198	0.6787	0.544	0.6585	0.7545
CAP1	1984	ES	1.2:2.1	1.1	2.2	0	1	0.4458	0.0638	0.4146	0.5898	0.614	0.4817	0.4521	0.4293	0.42	0.5459	0.5445	0.5048	0.5233	0.3906	0.4951	0.4397	0.5869	0.5784	0.5241	0.5085	0.432	0.5827	0.4794	0.5771	0.5303	0.5627	0.552	0.3349	0.4308	0.3982	0.4113	0.5813	0.4245	0.4901	0.4345	0.4878	0.4613	0.4598	0.5523	0.4226	0.4735	0.512
CAP1	1985	AA	2.1	1.1	2.2	0	0.9964	0.4292	0.0578	0.2482	0.292	0.3046	0.1623	0.2933	0.2263	0.2066	0.3813	0.2714	0.3562	0.2933	0.2111	0.1886	0.2651	0.3568	0.2761	0.2333	0.3125	0.2918	0.2756	0.3089	0.434	0.2861	0.2589	0.3133	0.2289	0.2135	0.3062	0.3156	0.256	0.3191	0.2809	0.2916	0.2251	0.2333	0.3418	0.3675	0.3791	0.3169	0.2535
CAP1	1986	AD	1.2	1.1	2.2	0	1	0.4342	0.0436	0.6799	0.7584	0.8099	0.7333	0.6972	0.6839	0.6695	0.7767	0.7825	0.7922	0.768	0.6834	0.712	0.6963	0.7602	0.7501	0.8223	0.7597	0.7737	0.8313	0.7639	0.785	0.7812	0.7628	0.7607	0.6777	0.7014	0.7522	0.775	0.7868	0.6832	0.7103	0.6561	0.7436	0.6693	0.7045	0.7463	0.6833	0.7437	0.7217
PPT1	1987	AP	1			0	1	0.0369	0.0035	1	0.99	1	1	1	1	1	1	1	1	1	1	1	0.9961	1	1	1	1	1	1	1	0.9948	1	1	1	1	1	0.9853	1	1	0.9631	1	1	1	1	1	0.993	1	0.9959	0.9931
PPT1	1988	AP	6			0	1	0.0369	0.0035	0	0.01	0	0	0	0	0	0	0	0	0	0	0	0.0039	0	0	0	0	0	0	0	0.0052	0	0	0	0	0	0.0147	0	0	0.0369	0	0	0	0	0	0.007	0	0.0041	0.0069
PPT1	1991	RI	10.2	10.1	10.3	0	1	0.0064	0.0005	1	1	0.9996	1	1	1	1	1	1	1	1	0.9979	1	0.9993	1	1	1	1	1	1	1	1	1	1	1	1	1	0.999	1	1	1	1	1	1	1	1	1	1	1	1
PPT1	1992	ES	9	8	10.1	1	0.8382	0.0459	0.0092	0.9711	0.9554	0.9717	0.9746	0.9638	0.974	0.9763	0.965	0.9752	0.9664	0.9726	0.9673	0.974	0.9786	0.9565	0.9809		0.9556	0.9796	0.9595		0.9795	0.967	0.9784		0.9742	0.9564	0.9705	0.9539	0.9696	0.9623	0.9798	0.9651	0.9705		0.978	0.9652		0.9654	0.9703
PPT1	1993	AA	5.1	4	5.2	0	1	0.0129	0.0015	0	0.0019	0.0004	0	0.0013	0.0006	0	0	0.0007	0.0007	0	0	0	0.0022	0.0008	0	0	0.0024	0	0	0.0007	0	0.0007	0	0.0024	0.0013	0.0008	0.001	0.0033	0	0	0.0018	0	0	0	0	0	0	0.0013	0
PPT1	1995	ES	02:03:04	1	5.2	0	1	0.0068	0.001	1	1	1	1	1	0.9992	1	1	1	0.9991	1	1	1	1	1	1	1	1	1	0.9948	0.999	1	1	1	1	1	1	1	1	1	1	1	1	1	1	1	1	1	0.9971	1
SMAP2	1996	AP	3			0	1	0.0622	0.0084	0	0	0	0	0	0	0	0.0178	0	0	0	0	0	0	0	0	0.0386	0	0	0	0	0	0.0199	0	0	0	0	0.0181	0	0	0	0	0	0	0	0	0	0	0	0
SMAP2	1997	AP	1			0	1	0.3042	0.0386	1	0.97	0.8345	0.9407	0.956	0.8969	0.9407	0.9484	0.9691	0.963	0.9098	0.9594	1	0.9549	1	0.9555	0.9614	0.909	0.9141	0.9021	1	0.927	0.9707	0.9701	0.9589	0.9771	0.9529	0.9561	0.958	0.9566	0.9148	0.9568	0.969	0.9434	0.9855	1	0.983	0.9088	0.9717	0.9564
SMAP2	1998	AP	2			0	1	0.3042	0.0379	0	0.03	0.1655	0.0593	0.044	0.1031	0.0593	0.0339	0.0309	0.037	0.0902	0.0406	0	0.0451	0	0.0445	0	0.091	0.0859	0.0979	0	0.073	0.0095	0.0299	0.0411	0.0229	0.0471	0.0259	0.042	0.0434	0.0852	0.0432	0.031	0.0566	0.0145	0	0.017	0.0912	0.0283	0.0436
ZFP69	2001	AA	2.1	1	2.2	0	0.9818	0.6298	0.1063	1	0.9371	0.8922	0.8999	1	0.9261	1	0.8475	0.7742	0.9158	1			0.8376	0.919	0.4861	0.9175	0.9234	1	0.938	1	1	0.9123	1	1	0.9065	0.9095	0.7637	0.88	0.5418	0.796	0.9648	0.7223	1	0.6149	0.6038	0.8922	1	1	1
EXO5	2002	RI	1.4	1.3	1.5	0	0.76	1	0.1625				0.1036	0.4226	0	0.3394	0.3162	0	0.288				0.6754	0.0932		0.062	0.1704		0.1036	0.2482		0.3813	0.1878	0.2575	0.2445	0.1245	0.4804	0.1966	0.2356		0.3424		0.1878		0.3672	0.209		0.311	0.3813
EXO5	2003	RI	1.2	1.1	1.3	0	0.9564	0.7694	0.1803		0.492		1	0.8109	0.6336	0.7017	1	0.5804	1		1	0.6595	1	0.7244		0.3562	0.8941	0.7685	1	0.7948	1	1	0.6241	0.7439	0.6954	0.8005	1	0.9076	1	0.5804	0.5905		0.5679	0.467	1	0.6513	0.5804	0.5259	1
EXO5	2006	AD	1.2:1.3	1.1	1.5	0	0.9727	0.6547	0.0922	1	1		1	0.8935	1	1	1	1	0.8293		1	1	0.8825	0.8751	1	1	1	1	1	1	1	0.8665	1	1	0.7815	1	0.9595	0.9415	1	1	0.7333	1	1	0.4907	0.7802	1	1	1	1
ZNF684	2008	AT	5.2			0	1	0.6299	0.1131	0.1149	0.4242	0.2291	0.1483	0.2393	0.21	0.2206	0.2847	0.2833	0.3636	0.2797	0.2653	0.2704	0.346	0.303	0.2039	0.3622	0.2921	0.2441	0.221	0.1696	0.2438	0.2888	0.4372	0.2238	0.2498	0.2136	0.3813	0.3137	0.5061	0.7139	0.3718	0.5261	0.2219	0.433	0.3361	0.1884	0.4239	0.2375	0.348
ZNF684	2009	AT	6			0	1	0.6299	0.1131	0.8851	0.5758	0.7709	0.8517	0.7607	0.79	0.7794	0.7153	0.7167	0.6364	0.7203	0.7347	0.7296	0.654	0.697	0.7961	0.6378	0.7079	0.7559	0.779	0.8304	0.7562	0.7112	0.5628	0.7762	0.7502	0.7864	0.6187	0.6863	0.4939	0.2861	0.6282	0.4739	0.7781	0.567	0.6639	0.8116	0.5761	0.7625	0.652
NFYC	2012	AP	10			0	1	0.1073	0.0129	0.0041	0.0068	0.0287	0.0036	0.0222	0.0174	0.0122	0.0213	0.0102	0.0138	0	0.0246	0.0043	0.0226	0.0146	0.015	0.0266	0.0031	0.0417	0.0389	0.0332	0.0178	0.0187	0.0134	0.0188	0.0152	0.0101	0.0224	0.0339	0.0129	0.0306	0.0072	0.026	0.0101	0.0123	0.0122	0.0121	0.0198	0.0041	0.0426
NFYC	2013	AP	1			0	1	0.2662	0.0494	0.8777	0.9447	0.8205	0.8594	0.9269	0.9462	0.9398	0.7837	0.9459	0.9366	0.9883	0.9674	0.834	0.8973	0.9664	0.9495	0.9028	0.9236	0.894	0.8329	0.8491	0.8619	0.9324	0.917	0.7287	0.9609	0.9505	0.9445	0.896	0.8009	0.8713	0.9579	0.9416	0.9556	0.9693	0.9185	0.9099	0.955	0.9126	0.8994
NFYC	2014	AP	2			0	1	0.0604	0.0065	0.0084	0	0	0	0.0048	0.0051	0.0094	0.0029	0	0	0	0.0032	0	0.007	0.003	0	0.0078	0.0016	0.0101	0.0057	0	0	0	0	0.0103	0	0.003	0.0039	0.0121	0.0121	0.0074	0.0037	0.0041	0.0041	0.0073	0	0.0083	0.0045	0.0085	0.0125
NFYC	2015	AP	4			0	1	0.2425	0.0454	0.1097	0.0485	0.1508	0.137	0.0461	0.0313	0.0385	0.1921	0.044	0.0496	0.0117	0.0048	0.1617	0.0731	0.016	0.0355	0.0628	0.0717	0.0541	0.1225	0.1177	0.1203	0.049	0.0695	0.2423	0.0239	0.0364	0.0292	0.058	0.1741	0.0907	0.0312	0.0283	0.0301	0.0111	0.0693	0.0698	0.0208	0.0747	0.0455
NFYC	2017	AA	20.1:20.2	19	20.3	0	1	0.3015	0.0442	0.8849	0.9042	0.928	0.8972	0.9505	0.8826	0.9465	0.7662	1	0.9067	1	0.9118	1	0.968	0.916	1	0.8861	0.9141	0.9268	0.9347	1	0.9111	0.8449	0.826	0.9216	0.8229	0.9213	0.9358	0.9216	0.9313	0.9798	0.9298	0.9566	0.9035	0.8599	0.8839	0.9234	0.9448	1	0.9465
NFYC	2018	AA	20.2	19	20.3	0	1	0.1583	0.0236	0.9471	0.9301	0.9603	0.9372	0.9647	0.9552	0.9795	0.9126	1	0.9579	1	0.9413	1	0.9705	0.9656	1	0.9286	0.9356	0.9652	0.9342	1	0.9405	0.8939	0.9083	0.9485	0.91	0.9615	0.9334	0.9543	0.9603	0.9896	0.9585	0.9862	0.952	0.9076	0.9248	0.9681	0.9623	1	0.9659
NFYC	2019	AA	20.1	19	20.2	0	1	0.4607	0.0698	0.295	0.4088	0.3418	0.3634	0.4066	0.256	0.2656	0.2344	0.3444	0.2941	0.2808	0.3858	0.2546	0.4725	0.2748	0.3395	0.3686	0.4168	0.3079	0.4958	0.3745	0.3873	0.3868	0.3187	0.3839	0.3095	0.3138	0.5038	0.3546	0.3534	0.3332	0.3584	0.2308	0.315	0.3787	0.3762	0.2793	0.3955	0.3213	0.3786
NFYC	2020	ES	18	17	19	0	1	0.2942	0.0436	0.189	0.1777	0.0916	0.0608	0.1588	0.1118	0.0916	0.0734	0.1186	0.1157	0.1455	0.0888	0.0683	0.1196	0.1504	0.0642	0.0848	0.1485	0.1129	0.1038	0.212	0.0587	0.0892	0.1454	0.1094	0.1308	0.1106	0.1375	0.1193	0.1486	0.1972	0.1078	0.0854	0.0893	0.1919	0.139	0.0659	0.0983	0.0646	0.1171
NFYC	2021	AA	16.1	15	16.2	0	1	0.0292	0.0043	1	1	1	1	0.9971	1	1	0.9966	1	0.995	1	1	1	1	1	1	1	1	1	1	1	1	0.9959	0.9951	0.9928	1	1	1	1	1	1	0.99	1	1	1	0.9931	1	1	0.9947	0.9963
NFYC	2022	ES	13	12	14	0	1	0.0228	0.0038	1	1	1	1	1	1	1	1	1	1	1	1	0.9872	0.9968	0.9919	1	1	1	1	0.9925	1	1	1	0.9951	1	0.9913	0.9965	1	0.99	1	1	1	1	0.9912	1	1	1	1	1	1
NFYC	2023	ES	6	1	11	0	1	0.2525	0.0402	0.0272	0.0614	0.077	0.0129	0.0195	0	0.0074	0.114	0.0499	0.0905	0	0.0485	0.0091	0	0	0.0601	0	0.0392	0.0297	0.164	0.0763	0	0.1079	0.0566	0.065	0.0352	0	0.0427	0.0394	0.0865	0.0673	0.0285	0.0091	0.0795	0.0455	0.0898	0.0235	0.0416	0.0444	0.0395
CTPS1	2025	AP	2			0	1	0.2275	0.0245	0	0	0	0	0	0.0774	0	0	0	0	0	0	0	0	0	0	0	0	0	0	0	0	0	0	0	0.0484	0	0.013	0	0	0	0	0	0	0	0	0.0485	0	0	0.0403
CTPS1	2026	AP	1			0	1	0.2696	0.0442	1	0.8814	1	1	1	0.9226	1	1	0.8252	1	1	1	1	0.9291	0.9815	1	1	0.9873	1	0.9421	0.9615	1	1	0.9507	1	0.9208	0.9492	0.987	0.8208	1	0.7924	0.95	1	1	1	0.8519	0.9515	1	1	0.8826
CTPS1	2027	AP	3.1			0	1	0.2076	0.0359	0	0.1186	0	0	0	0	0	0	0.1748	0	0	0	0	0.0709	0.0185	0	0	0.0127	0	0.0579	0.0385	0	0	0.0493	0	0.0309	0.0508	0	0.1792	0	0.2076	0.05	0	0	0	0.1481	0	0	0	0.0771
CTPS1	2028	AT	9.2			0	1	0.0566	0.0095	0.0062	0.0061	0.0056	0	0.025	0.022	0.0068	0.0129	0.0063	0.0079	0	0.0048	0.0018	0.0235	0.0108	0.0054	0.0094	0.0008	0.0064	0.0023	0	0.008	0.0077	0.0015	0.0233	0.0083	0.0044	0.0114	0.0052	0.0031	0.0314	0.0122	0.0097	0	0.0039	0.0111	0.0073	0.0131	0.0083	0
CTPS1	2029	AT	20			0	1	0.0566	0.0095	0.9938	0.9939	0.9944	1	0.975	0.978	0.9932	0.9871	0.9937	0.9921	1	0.9952	0.9982	0.9765	0.9892	0.9946	0.9906	0.9992	0.9936	0.9977	1	0.992	0.9923	0.9985	0.9767	0.9917	0.9956	0.9886	0.9948	0.9969	0.9686	0.9878	0.9903	1	0.9961	0.9889	0.9927	0.9869	0.9917	1
CTPS1	2030	ES	3.2:4:5:6	1	7	0	1	0.0212	0.0011	1	1	1	1	1	1	1	1	1	1	1	1	1	1	1	1	1	1	1	1	1	1	1	1	1	1	1	1	1	1	1	1	1	1	1	1	1	1	1	1
SCMH1	2041	AP	1			0	0.9327	0.7748	0.1224		0.8371	0.6782	0.8204	0.5068	0.925		0.81		0.6782	0.9013	0.8457	1	0.9095	0.8809		0.9588	0.8847	0.5781	0.8694	0.7789	1	0.8526	0.6463	0.9403	0.932	0.932	0.8762	0.7014	0.8204	0.4066	0.9652	0.6218	0.8002	0.8604	0.5079	0.8694	0.7851	0.9877	0.8381
SCMH1	2042	AP	4.1			0	0.9327	0.2998	0.0474		0	0	0	0	0		0.0633		0.1485	0.0987	0	0	0.0603	0		0	0.0346	0	0.056	0	0	0	0.1769	0	0	0	0	0.128	0	0.1272	0	0	0.0461	0.1047	0.2785	0	0	0	0.054
SCMH1	2046	AP	3			0	0.9327	0.5976	0.1048		0.1629	0.3218	0.1796	0.4932	0.075		0.1267		0.1733	0	0.1543	0	0.0302	0.1191		0.0412	0.0807	0.4219	0.0746	0.2211	0	0.1474	0.1769	0.0597	0.068	0.068	0.1238	0.1706	0.1796	0.4663	0.0348	0.3782	0.1537	0.0349	0.2136	0.1306	0.2149	0.0123	0.1079
SCMH1	2047	ES	17	16	18	0	0.9982	0.7333	0.102	0.8748	0.5976	0.9209	0.5744	0.6567	0.7186	0.5671	0.5467	0.6919	0.5616	0.6112	0.5725	0.5596	0.6066	0.6466	0.6359	0.6191	0.669	0.6708	0.66	0.7667	0.6172	0.6687	0.538	0.5848	0.6036	0.6894	0.5892	0.5616	0.7485	0.7098	0.4747	0.4142	0.6737	0.6679	0.6769	0.538	0.803	0.6866	0.6996
SCMH1	2048	ES	10:11:00	9	12	0	1	0.1809	0.0171	1	1	1	1	1	0.9682	1	1	1	0.9748	1	1	1	0.9886	1	1	0.9858	1	1	1	1	1	1	0.9785	1	1	1	0.9901	1	0.9735	1	0.9917	1	0.9865	1	1	1	1	1	1
SCMH1	2049	ES	07:08:00	6	9	0	0.9909	0.5058	0.088	1	0.8096	0.8721	0.9105	1	0.861	1	1	0.717	0.8053	0.8745	1	1	0.9429	0.8253	0.7159	0.8846	0.935	0.8538	0.6849	0.9565	0.8356	1	0.8985	0.924	0.7324	0.9404	0.8965	0.9295	0.9539	0.8315	0.7018	1	0.925	1	1	0.8635	0.84	1	0.9157
SCMH1	2051	ES	7	6	8	0	0.98	0.6714	0.1073	0.8358	0.932	0.8572	0.7417	1	0.7014	0.3286	1	0.7689	0.7255	0.8358	1	0.758	0.8438	0.9271	1	0.9	0.8221	0.9385	0.758	0.7997	0.9215	0.8005	0.7179	0.8671	1	0.9261	0.7689	0.6867	0.896	1	0.6423	0.8245	0.9514	0.6379	1	0.7836	0.5184	0.8627	0.8314
SCMH1	2053	ES	06:07:08	5	9	0	0.9909	0.8269	0.1211	0.475	0.7203	0.7414	0.7411	0.8585	0.8347		0.8963	0.6733	0.7171	0.7243	0.9173	0.7329	0.8	0.8706	0.6233	0.8201	0.806	0.9322	0.5355	0.9307	0.7589	0.7145	0.7337	0.6486	0.8303	0.8383	0.6133	0.7235	0.8937	1	0.4286	1	0.892	1	1	0.6938	0.53	0.9283	0.7698
SCMH1	2054	ES	06:08:00	5	9	0	0.8309	1	0.2065		0.2101	0.4491	0.6863		0.7306	1		0.3812	0.6089	0.6452		0.663	0.5415	0.4571		0.4494	0.6763	0.7353	0.5176	0.8422	0.3783	0.5822	0.5284	0.3783		0.3285	0.4645	0.6628	0.5733		0.4237	1	0.4894	1		0.4706	0.6812	0.8116	0.5449
SCMH1	2055	ES	8	5	9	0	0.76	0.8502	0.1665	0.6177	0.7426	0.5423	0.6123	0.7987			0.655	0.6744	0.4805		0.8483		0.6827	0.6948		0.3455	0.6789	0.8788	0.2669	0.7263	0.4389	0.4065	0.503	0.5513		0.8091	0.4101	0.5638	0.8572		0.68			1		0.4671	0.7197	0.8573	0.5836
SCMH1	2057	ES	06:07:00	5	8	0	0.9855	0.7031	0.1423	0.3043	0.521	0.7249	0.666	0.5919	0.906		0.8391	0.5264	0.7545	0.6918	0.7481	0.5919	0.6915	0.76	0.8337	0.9105	0.6913	0.6745	0.7517	0.8175	0.8422	0.802	0.7513	0.641	0.8626	0.611	0.7412	0.7011	0.6202	0.7626	0.3152	0.6309	0.9573	0.4902	0.8571	0.7698	0.3337	0.6799	0.7439
SCMH1	2058	ES	6	5	8	0	0.8055	1	0.201	0.0925	0.0966	0.4224	0.5984	0	0.8369	1		0.2438	0.6471	0.5963		0.5169	0.3884	0.2801		0.6373	0.5216	0.2895	0.7381	0.6424	0.4935	0.6876	0.5446	0.3612		0.1232	0.5981	0.6299	0.2005		0.2991		0.7166	0.6025		0.5539	0.4783	0.4137	0.4986
FOXJ3	2063	AP	5.1			0	0.9945	0	0	0	0	0	0	0	0	0	0	0	0		0	0	0	0	0	0	0	0	0	0	0	0	0	0	0	0	0	0	0	0	0	0	0	0	0	0	0	0	0
FOXJ3	2064	AP	2			0	0.9945	0.9146	0.1873	0.3673	0.2677	0.4052	0.4607	0.4498	0.5119	0.1643	0.4529	0.3674	0.4428		0.4613	0.169	0.3386	0.4145	0.772	0.4346	0.6092	0.4757	0.6447	0.597	0.5633	0.4818	0.6337	0.7313	0.7767	0.6643	0.646	0.2778	0.5471	0.6058	0.3344	0.1986	0.6971	0.6984	0.3448	0.5994	0.7264	0.5353	0.4693
FOXJ3	2065	AP	14.1			0	0.9945	0.7547	0.1317	0	0.37	0.3953	0.2747	0.3657	0.1942	0.1684	0.1013	0.0358	0.2749		0.0563	0.0824	0.5825	0.3266	0	0.2446	0.1007	0.2707	0.1887	0.251	0.1085	0.2199	0.1978	0.1396	0.0554	0.0798	0.2513	0.2914	0.2011	0.1034	0.1869	0.0388	0.0395	0.0516	0.5441	0.2474	0.2011	0.4084	0.2289
FOXJ3	2066	AP	3			0	0.9945	0.0628	0.0053	0	0	0	0	0	0	0	0	0	0		0	0	0	0	0	0	0	0	0	0	0	0	0	0	0	0	0	0	0	0	0	0	0	0	0	0	0	0	0
FOXJ3	2067	AP	1			0	0.9945	0.9241	0.168	0.6327	0.3623	0.1994	0.2646	0.1845	0.2939	0.6673	0.4458	0.5967	0.2823		0.4825	0.7486	0.0789	0.2589	0.228	0.3208	0.2902	0.2536	0.1666	0.152	0.3283	0.2983	0.1684	0.1291	0.1678	0.2559	0.1026	0.4308	0.2517	0.2907	0.4787	0.7626	0.2633	0.25	0.1111	0.1532	0.0725	0.0563	0.3018
FOXJ3	2068	RI	14.3	14.2	14.4	0	0.9964	0.3493	0.0338	0.0194	0.0647	0	0	0.0204	0.0122	0	0.008	0	0.0215	0	0.0141	0.0112	0.0668	0.0122	0	0.015	0.0116	0.0319	0.0341	0.0094	0.0209	0.058	0.0036	0.0116	0.0235	0.0084	0.0148	0.0861	0.0115	0.026	0.0223	0	0.0099	0	0.1322	0.0128	0.0413	0.0244	0.0064
FOXJ3	2069	ES	10	9	11	0	0.9945	0.6109	0.0824	0.6926	0.8593	0.8229	0.5967	0.7399	0.651	0.6696	0.7782	0.6948	0.6918	0.9087	0.7721	0.8915	0.8643	0.8102	0.9382	0.7399	0.7983	0.8199	0.6888	0.7241	0.7685	0.7372	0.7249	0.7444	0.7482	0.8629	0.7704	0.7627	0.644	0.7399	0.6539	0.6125	0.7721	0.7317	0.9542	0.641	0.8052	0.9124	0.8836
PPCS	2071	AP	1			0	1	0.1254	0.018	0.013	0.0422	0.0159	0.0221	0.0365	0.0153	0.0227	0.018	0.0158	0.0309	0.048	0.0135	0.0239	0.0495	0.0101	0.063	0.0229	0.0228	0.0106	0.0456	0.0104	0.0111	0.0255	0.0084	0.0207	0.029	0.0076	0.0294	0.095	0.0217	0.0101	0.0361	0.0147	0.0114	0.0143	0.009	0.0299	0.0142	0.0285	0.014
PPCS	2072	AP	2.1			0	1	0.1254	0.018	0.987	0.9578	0.9841	0.9779	0.9635	0.9847	0.9773	0.982	0.9843	0.9691	0.952	0.9865	0.9761	0.9505	0.9899	0.937	0.9771	0.9772	0.9894	0.9544	0.9896	0.9889	0.9745	0.9916	0.9793	0.971	0.9924	0.9706	0.905	0.9783	0.9899	0.9639	0.9853	0.9886	0.9857	0.991	0.9701	0.9858	0.9715	0.986
PPCS	2073	AT	4			0	1	0.1037	0.017	0.9746	0.9583	0.9824	0.9826	0.9533	0.9594	0.944	0.9684	0.9598	0.9424	0.9774	0.9793	0.9827	0.9375	0.9631	0.9656	0.9663	0.9698	0.9507	0.9654	0.9724	0.9637	0.9493	0.9657	0.9631	0.9642	0.9767	0.9747	0.9549	0.9717	0.9542	0.9375	0.9771	0.9844	0.9891	0.9749	0.9629	0.9726	0.9621	0.9831
PPCS	2074	AT	3.2			0	1	0.1037	0.017	0.0254	0.0417	0.0176	0.0174	0.0467	0.0406	0.056	0.0316	0.0402	0.0576	0.0226	0.0207	0.0173	0.0625	0.0369	0.0344	0.0337	0.0302	0.0493	0.0346	0.0276	0.0363	0.0507	0.0343	0.0369	0.0358	0.0233	0.0253	0.0451	0.0283	0.0458	0.0625	0.0229	0.0156	0.0109	0.0251	0.0371	0.0274	0.0379	0.0169
PPCS	2075	AD	2.2	2.1	3.1	0	1	0.5262	0.0936	0.6246	0.8089	0.5842	0.6926	0.7598	0.8149	0.6845	0.7563	0.7825	0.7283	0.6855	0.739	0.7728	0.7873	0.7472	0.6533	0.7273	0.7708	0.7948	0.8017	0.7119	0.7079	0.6993	0.6802	0.6309	0.8356	0.639	0.7244	0.821	0.7136	0.8227	0.9109	0.6771	0.7439	0.815	0.7178	0.8026	0.8225	0.6913	0.6309
PPIH	2095	AP	3.1			0	1	0.0255	0.0035	0	0.0035	0.0087	0.0018	0.0012	0.0037	0.002	0.005	0.0014	0.001	0	0.003	0	0.0028	0.0023	0.0255	0.002	0.0036	0	0	0.0022	0	0.0041	0	0.0038	0.0018	0.0059	0.0066	0.0074	0.0086	0.0114	0.0043	0	0.0025	0.0009	0.0012	0.0008	0	0.0072	0.0074
PPIH	2096	AP	1			0	1	0.2439	0.0313	0.9854	0.9491	0.9775	0.9751	0.9885	0.9332	0.9752	0.9556	0.9033	0.9219	0.9831	0.9479	0.961	0.97	0.97	0.8444	0.969	0.9506	0.9673	0.9966	0.9859	0.9861	0.9656	0.9853	0.9592	0.983	0.9496	0.9669	0.9046	0.9803	0.8551	0.9847	0.9287	0.9769	0.9896	0.935	0.982	0.9801	0.9675	0.9579
PPIH	2097	AP	2.1			0	1	0.2398	0.0305	0.0146	0.0474	0.0138	0.0231	0.0102	0.0631	0.0228	0.0394	0.0953	0.0771	0.0169	0.0491	0.039	0.0272	0.0277	0.1301	0.0291	0.0458	0.0327	0.0034	0.0119	0.0139	0.0303	0.0147	0.037	0.0152	0.0444	0.0265	0.088	0.0111	0.1335	0.011	0.0713	0.0206	0.0095	0.0638	0.0172	0.0199	0.0253	0.0348
PPIH	2100	AT	10			0	1	0.1284	0.0215	0.9898	0.9668	0.9908	0.9909	0.9808	0.9871	0.989	0.978	0.9845	0.9731	1	0.9738	0.9949	0.9311	0.9898	0.9966	0.9857	0.9908	0.9828	0.9624	0.9801	0.9894	0.9705	0.983	0.97	0.9858	0.9762	0.9643	0.9742	0.9667	0.9658	0.9648	0.9976	0.9951	0.9977	0.9838	0.994	0.9852	0.9627	0.9735
PPIH	2101	AT	9.2			0	1	0.1284	0.0215	0.0102	0.0332	0.0092	0.0091	0.0192	0.0129	0.011	0.022	0.0155	0.0269	0	0.0262	0.0051	0.0689	0.0102	0.0034	0.0143	0.0092	0.0172	0.0376	0.0199	0.0106	0.0295	0.017	0.03	0.0142	0.0238	0.0357	0.0258	0.0333	0.0342	0.0352	0.0024	0.0049	0.0023	0.0162	0.006	0.0148	0.0373	0.0265
PPIH	2103	AD	3.3	3.2	4	0	1	0.204	0.0283	0.0164	0.0609	0.0322	0.0029	0.0216	0.0349	0.0348	0.0317	0.0522	0.0435	0	0.0325	0.0217	0.0425	0.0367	0.1051	0.0942	0.0508	0.0358	0.029	0.0162	0.0309	0.0575	0.0322	0.0393	0.019	0.0328	0.0388	0.0692	0.0299	0.0614	0.0279	0.0272	0.0271	0.0146	0.0292	0.0059	0.0197	0.0126	0.0472
LEPRE1	2106	RI	14.3	14.2	14.4	0	0.9945	0.9717	0.1543	0.5448	0.493	0.7607	0.1193	0.6018	0.2133	0.2797	0.2648	0.2587	0.5993	0.1301	0.3355	0.2844	0.3026	0.2783	0.1108	0.2271	0.3523	0.5356	0.5486	0.4747	0.219	0.5486	0.2537	0.5166	0.1316	0.3688	0.3873	0.68	0.5181	0.3271	0.2611	0.3542	0.2655	0.2722	0.4687	0.3108	0.3019	0.3547	0.378
LEPRE1	2107	RI	14.2:14.3	14.1	14.4	0	1	0.6048	0.0699	0.1135	0.1268	0.6048	0.0372	0.2173	0.0746	0.0841	0.1049	0.102	0.2159	0.0342	0.0957	0.1164	0.1215	0.0776	0.0332	0.0413	0.0789	0.1717	0.1796	0.1563	0.0625	0.1699	0.0805	0.1737	0.0551	0.1382	0.1666	0.2861	0.1717	0.0579	0.0639	0.0688	0.0362	0.0703	0.2278	0.1062	0.1314	0.0914	0.0915
LEPRE1	2108	AD	14.2	14.1	14.4	0	0.9982	0.5324	0.0675	0.0995	0.1728		0.2549	0.2024	0.283	0.1815	0.3214	0.3254	0.2061	0.2684	0.2239	0.3006	0.3038	0.2778	0.3214	0.1898	0.1517	0.2316	0.2315	0.187	0.2007	0.2074	0.2614	0.2371	0.3365	0.2442	0.3105	0.2524	0.2667	0.1205	0.2003	0.1876	0.1093	0.223	0.3021	0.2424	0.3495	0.1939	0.2054
C1orf50	2109	AT	5			0	0.9982	0.2647	0.0424	0	0.0339	0	0.0304	0.0225	0.0375	0	0.0201	0	0.0205	0	0.0558	0.0538	0.0264	0	0	0	0.0556	0	0.0466	0.1525	0.0179	0	0.0348	0.0425	0.0315	0.0128	0.0442	0.0754	0.0331	0	0.1076	0	0.0677	0	0	0	0.0297	0.0376	0.0353
C1orf50	2110	AT	4.3			0	0.9982	0.4477	0.0589	1	0.916	1	0.9696	0.9775	0.9625	0.9552	0.95	0.9505	0.9795	1	0.9166	0.9462	0.954	1	1	1	0.9444	1	0.9534	0.8287	0.9821	0.9746	0.9652	0.9575	0.8751	0.9117	0.9558	0.8577	0.9423	0.7714	0.8924	1	0.8922	1	1	0.9672	0.9264	0.9624	0.9473
C1orf50	2111	AT	8			0	0.9982	0.2286	0.0305	0	0.0501	0	0	0	0	0.0448	0.0298	0.0495	0	0	0.0275	0	0.0196	0	0	0	0	0	0	0.0188	0	0.0254	0	0	0.0934	0.0756	0	0.067	0.0245	0.2286	0	0	0.0401	0	0	0.0328	0.0439	0	0.0174
C1orf50	2112	AA	2.1	1.3	2.2	0	0.9691	0.2968	0.0573	0.2348	0.0501	0	0.0954	0.0875	0	0.0405	0	0	0	0.2968	0.1176	0.1	0.0857	0.131			0.0473	0	0	0.0633	0.0369	0.128	0.0293	0.0176	0.0755	0.055	0.1062	0.0928	0.0633	0.0386	0.0324	0.0887	0.0516	0	0.1522	0.161	0.0314	0	0.0303
C1orf50	2115	ES	1.2:1.3:2.2	1.1	3	0	0.8782	0.6584	0.1097			0.781	1	1	1	0.8836	1	0.8339	0.8343		1	1	0.8969	0.9197	1		0.9352	1	1		1	1	0.7815	1	1		0.9231	1	1	1	0.828	1	1	0.7905	0.5248	1	1	0.702	1
C1orf50	2116	ES	1.3:2.2	1.1	3	0	0.9945	0.1359	0.0217	1	1	0.9202	1	1	1	0.9834	1	0.9778	0.9686	0.9092	1	1	0.9687	0.979	1	1	0.9818	1	1	1	1		0.9747	1	1	1	0.9889	1	1	1	0.9521	1	1	0.98	0.9035	1	1	0.9836	1
C1orf50	2117	RI	1.2	1.1	1.3	0	0.8764	0.7193	0.1188					0.1274	0.1682	0.1682	0.1709	0.1491	0.1957			0.1491	0.3046	0.2541			0.2892	0.1581		0.0464	0.1112		0.1112	0.1322	0.1085	0.0303	0.1797	0.0918	0.1034	0.2803	0.2462	0.226	0.1797	0.0987	0.1324			0.0575	0.1797
CCDC23	2118	AP	2			0	1	0.1133	0.0223	0.0084	0.0158	0.0268	0.0878	0.0189	0.0201	0.0158	0.0618	0.0231	0.0074	0.0186	0.0526	0.0172	0.0466	0.0182	0	0	0.0063	0.0207	0.009	0.0256	0	0.0383	0.021	0.0336	0.0382	0.0407	0.0117	0.04	0.0344	0.0419	0.0821	0.0162	0.0221	0	0.0282	0.0206	0.0246	0.0097	0.0485
CCDC23	2119	AP	1			0	1	0.1133	0.0223	0.9916	0.9842	0.9732	0.9122	0.9811	0.9799	0.9842	0.9382	0.9769	0.9926	0.9814	0.9474	0.9828	0.9534	0.9818	1	1	0.9937	0.9793	0.991	0.9744	1	0.9617	0.979	0.9664	0.9618	0.9593	0.9883	0.96	0.9656	0.9581	0.9179	0.9838	0.9779	1	0.9718	0.9794	0.9754	0.9903	0.9515
CCDC23	2120	RI	4.2	4.1	4.3	0	1	0.0484	0.006	0.9929	1	0.9903	1	0.9955	0.9953	0.9968	1	1	1	0.9892	0.991	0.9852	1	0.9869	1	0.9927	1	0.994	1	0.9913	0.9885	1	1	0.9902	1	0.993	0.9835	0.9894	0.9919	0.9933	1	1	0.9961	0.9958	0.9946	0.9904	1	1	1
ERMAP	2121	AP	2.1			0	0.9927	0.2398	0.0444	0	0	0	0	0.1209	0	0	0	0	0		0.0576	0	0	0	0	0	0.0106	0	0	0	0	0.0787	0	0	0.0441	0.0306	0.025	0	0.0493	0.0629	0	0	0	0	0	0	0	0	0
ERMAP	2122	AP	3.1			0	0.9927	0.7791	0.1223	0.0647	0.1486	0.1576	0.1526	0.275	0.1332	0.0604	0.0943	0.0403	0.1806		0.0874	0.1552	0.571	0.113	0.2012	0.2221	0.1312	0.335	0.1735	0.3176	0.0341	0.2612	0.1523	0.1526	0.0752	0.2202	0.2654	0.5204	0.2665	0.3695	0.2875	0.0647	0.0748	0.3397	0.294	0.0467	0.1604	0.0223	0.1854
ERMAP	2123	AP	1			0	0.9927	0.7791	0.1354	0.9353	0.8514	0.8424	0.8474	0.6042	0.8668	0.9396	0.9057	0.9597	0.8194		0.855	0.8448	0.429	0.887	0.7988	0.7779	0.8582	0.665	0.8265	0.6824	0.9659	0.6601	0.8477	0.8474	0.8808	0.7492	0.7096	0.4796	0.6841	0.5677	0.7125	0.9353	0.9252	0.6604	0.706	0.9533	0.8396	0.9777	0.8146
ERMAP	2124	RI	3.3	3.2	3.4	0	0.9327	1	0.1408	0.025	0.086		0.0715	0.1715	0.1583	0.0727	0.1189	0.023			0.2025	0.1079	0.4529	0.0659		0.192	0.1566	0.1389	0.18	0.0534	0.0979	0.1583	0.1583	0.0755	0.0449	0.2856	0.2488	0.6287	0.2114	0.6082	0.0861	0.0154	0.1099		0.2767	0.0388	0.0449	0.0232	0.2369
ZNF691	2127	ES	3	2.3	4	0	0.8564	0.7807	0.1253	0		0.342		0.1477	0.1935	0.1057	0.1203	0.2707	0.1293	0	0.115	0.115	0.2148	0.1681		0.1071	0.084	0.115	0.1477	0.1631	0.2327	0.2471	0.1293	0.1379	0.0297	0.0942	0.2707	0.1071	0.276		0.2028	0.0315	0.159	0.2063	0.7807			0.2288	0.2743
ZNF691	2128	RI	2.2	2.1	2.3	0	0.7564	0.9487	0.2152		0.3772	0.5699	0.3124	0.7518	0.2398	0.3064	0.4961		0.7395				0.6795	0.4128		0.3064	0.5699	0.6023	0.897	0.4544	0.8064	0.5024	0.3163	0.373	0.1851	0.5318	0.5517	0.4309	0.9215		0.5832			0.2746	1				1
ZNF691	2131	AD	2.2:2.3	2.1	4	0	0.9418	0.8956	0.1907	0.7833	1	0.7433	0.3572	0.861	0.4597	0.724	0.7207	0.4763	1		0.4059	0.356	0.9021	0.7706	0.4504	0.7202	0.6827	0.7259	0.8688	0.6428	0.7109	0.3726	0.7619	0.5584	0.5232	0.4439	0.6423	0.4382	0.7281		0.7202		0.1251	0.5651	1	0.5093		0.7023	1
ZNF691	2132	ES	2.3	2.1	4	0	0.88	1	0.1829	0.7177	1	0.7489	0.5938	0.7138	0.7816	0.889	0.7806	0.552	1	0.8312	0.5559	0.4647	0.8476	0.851		0.887	0.7091	0.6672		0.7511	0.4648	0.4549	0.8944	0.7218	0.8661	0.475	0.64	0.5787	0.2284		0.7044	0.8082	0.6862	0.8197		0	0.5983	0.8987
ZNF691	2135	ES	2.1:2.2:2.3	1	4	0	0.9582	1	0.1999	0.3454	0.4854	0.5565	0.1885	0.513	0.2028	0.2099	0.5536	0.3709	0.4635	0.0563	0.7874	0.471	0.6364	0.2771	0.4582	0.3332	0.4532	0.6089	0.7688	0.5997	0.8719	0.4551	0.3689	0.2294	0.0957	0.4162	0.6857	0.3858	0.5352	0.1687	0.5848	0.1012	0.0716	0.2914	0.6521	0.5849		0.1834	0.6005
ZNF691	2136	ES	2.1:2.3	1	4	0	0.9364	1	0.1893	0.4594	0.7278	0.8281	0.4303	0.406	0.5803	0.51	0.7278	0.4585	0.4767	0.3826	0.8517	0.7611	0.5856	0.5411		0.7702	0.5881	0.646	0.5226	0.7432	0.8416	0.6707	0.6168	0.5063	0.6187	0.4478	0.7454	0.6431	0.1882		0.6593	0.6741	0.6838	0.7668			0.4041	0.4764	0
ZNF691	2137	ES	2.1	1	4	0	0.8745	1	0.1895	0.2997		0.7497	0.3393	0.2501	0.3777	0.1501	0.5545	0.5675		0.211	0.8979	0.856	0.2638	0.2132	0.6953	0.4064	0.4945	0.5169	0.5621	0.6124	0.909	0.759	0.222	0.318	0.3222	0.5435	0.6787	0.6617	0.4772		0.5389	0.4211	0.6268	0.5431		0.7616	0.325	0.1725	0
SLC2A1	2138	AT	7			0	1	0.0928	0.0101	0.0146	0.0238	0.0012	0.0023	0.0091	0.0025	0.0034	0.0076	0.0095	0.0058	0.0034	0.0005	0.0042	0.0212	0.0088	0	0.0022	0.0053	0.0174	0.003	0.0035	0.0037	0.0113	0.0049	0.0126	0.0065	0.0024	0.0125	0.0319	0.0151	0.0011	0.0085	0.0077	0.001	0	0.0279	0.0049	0.0059	0.0087	0.0069
SLC2A1	2139	AT	4.3			0	1	0.0869	0.007	0.0061	0.0083	0.0006	0.0004	0.0093	0.0013	0.0021	0.0021	0.0025	0.0041	0.0017	0.0003	0.0021	0.0144	0.0035	0.0003	0.0012	0.0055	0.0072	0.0007	0.0018	0.0008	0.0061	0.0018	0.0044	0.0018	0.0017	0.0084	0.0328	0.0147	0.0012	0.0044	0.0015	0.0006	0.0006	0.0183	0.0042	0.0028	0.0055	0.0055
SLC2A1	2140	AT	11			0	1	0.1797	0.0162	0.9794	0.9679	0.9983	0.9973	0.9816	0.9962	0.9944	0.9903	0.988	0.9901	0.9949	0.9992	0.9937	0.9644	0.9877	0.9997	0.9967	0.9892	0.9753	0.9963	0.9948	0.9954	0.9826	0.9933	0.9829	0.9916	0.9959	0.9791	0.9353	0.9702	0.9976	0.9871	0.9909	0.9983	0.9994	0.9538	0.9909	0.9914	0.9857	0.9876
FAM183A	2141	AP	1			0	0.9273	1	0.2826	0.7707	0.4445	0.2374	0.147	0.4939		0.8195	0.6846	0.2858	0.5284	0.9387	0.7017	0.6668	0.7004	0.6389		0.5638	0.8499	0.5834	0.8345	0.8077	0.4829	0.1692	0.9181	0.6378	0.2054	0.767	0.6354	0.2222	0.5852	0.5903	0.8278	0.221	0.698	0.0243	0.4408	0.6471	0.071	0.0475	0.4727
FAM183A	2142	AP	2.1			0	0.9273	1	0.2826	0.2293	0.5555	0.7626	0.853	0.5061		0.1805	0.3154	0.7142	0.4716	0.0613	0.2983	0.3332	0.2996	0.3611		0.4362	0.1501	0.4166	0.1655	0.1922	0.5171	0.8308	0.0819	0.3622	0.7946	0.233	0.3646	0.7778	0.4148	0.4097	0.1722	0.779	0.302	0.9757	0.5592	0.3529	0.929	0.9525	0.5273
EBNA1BP2	2145	AP	2.1			0	1	0.2784	0.0375	0.9776	0.9925	1	0.8953	0.9493	0.9895	0.9753	0.9832	0.9843	0.9851	0.9403	0.9952	0.9898	0.9942	0.986	0.9761	0.9842	0.9874	0.9735	0.9907	0.981	0.9841	0.9811	0.9855	0.9607	0.9832	0.9777	0.9896	0.9783	0.9772	0.9881	0.9625	0.8561	0.9868	0.9787	0.9356	0.9868	0.991	0.952	0.9939
EBNA1BP2	2146	AP	1			0	1	0.2784	0.0375	0.0224	0.0075	0	0.1047	0.0507	0.0105	0.0247	0.0168	0.0157	0.0149	0.0597	0.0048	0.0102	0.0058	0.014	0.0239	0.0158	0.0126	0.0265	0.0093	0.019	0.0159	0.0189	0.0145	0.0393	0.0168	0.0223	0.0104	0.0217	0.0228	0.0119	0.0375	0.1439	0.0132	0.0213	0.0644	0.0132	0.009	0.048	0.0061
C1orf210	2154	AD	1.2	1.1	2	0	0.9473	0.3533	0.0581	1	1	1	1	0.9494	0.8799	0.9149	0.9225	1		1	0.8103	1		1		1	0.9238	1	1	1		1	1	0.9565	1	0.9058	0.9166	1	1	1	0.9429	0.9625	0.8561	1	1	0.9251	1	0.9494	1
TIE1	2158	AT	8			0	1	0.1535	0.018	0	0	0	0	0	0	0	0	0	0	0.0458	0	0	0.0729	0	0	0	0.0135	0	0	0	0	0.0167	0.0281	0	0	0.0323	0	0.0105	0	0	0.0423	0	0	0	0	0	0	0	0
TIE1	2159	AT	24			0	1	0.1535	0.018	1	1	1	1	1	1	1	1	1	1	0.9542	1	1	0.9271	1	1	1	0.9865	1	1	1	1	0.9833	0.9719	1	1	0.9677	1	0.9895	1	1	0.9577	1	1	1	1	1	1	1	1
TIE1	2160	ES	07:09:00	6	10	0	0.9727	0.1579	0.0118	1	1	1	1	1	1	1	0.9633	1	1	1	1	1	1	1	1	1	1	1	1	1	1	1	1	1	1	1	1	1	1	1	1	1	1	1	1	1	1	1	1
TIE1	2162	ES	7	6	9	0	0.9309	0.5967	0.0869	1	0.7715	0.921	0.742	0.8695	1	0.8162	0.8174	1	1	0.9016	0.8695	0.909	0.8838	0.7533	0.8208	0.6921	0.8351	0.921	1	0.8878	1	0.8743	1	0.8565	0.9054	0.8114	0.9302	0.7574	0.696	0.909	0.7801	0.808	0.9259	0.775		0.9514	0.7614	0.8446	0.8999
CDC20	2165	AP	2.1			0	0.9255	0.5495	0.0529	0.1736	0.2462		0.1765	0.103	0.1455	0.1174	0.0975	0.0848	0.0736	0.1696	0.2029	0.1393	0.139	0.1158	0.1512	0.2175	0.1524	0.1822	0.2026	0.2377	0.1442	0.131	0.1073	0.1639	0.1567	0.1315	0.1238	0.1404	0.1344	0.1007	0.1362	0.0785	0.1114	0.1063	0.2158	0.1248	0.0861	0.0973	0.1301
CDC20	2166	AP	1			0	0.9255	0.5495	0.0529	0.8264	0.7538		0.8235	0.897	0.8545	0.8826	0.9025	0.9152	0.9264	0.8304	0.7971	0.8607	0.861	0.8842	0.8488	0.7825	0.8476	0.8178	0.7974	0.7623	0.8558	0.869	0.8927	0.8361	0.8433	0.8685	0.8762	0.8596	0.8656	0.8993	0.8638	0.9215	0.8886	0.8937	0.7842	0.8752	0.9139	0.9027	0.8699
ELOVL1	2167	ES	4	3	5	0	1	0.0335	0.0035	0.9912	1	0.9957	1	0.9952	0.9983	1	0.9954	1	1	1	1	1	1	0.9928	1	1	0.9967	1	1	0.9936	1	0.9967	0.9936	0.9991	0.9965	1	0.9969	1	0.9982	1	0.998	1	0.997	0.9965	1	1	0.9931	1	0.996
MED8	2170	RI	7.2	7.1	7.3	0	1	0.144	0.0194	0.9787	0.9929	0.9901	0.9733	0.9814	0.9773	0.9762	0.958	0.9403	0.9714	0.9681	0.964	0.9927	0.9615	0.9621	0.969	0.9766	0.9675	0.9883	0.9629	0.9676	0.983	0.9827	0.985	0.9752	0.9722	0.9155	0.9523	0.9529	0.9847	0.9764	0.9519	0.9267	0.9776	0.9523	0.9773	0.9686	0.9947	0.9689	0.9595
MED8	2171	AA	3.1	2.2	3.2	0	1	0.0434	0.0085	1	1	1	0.9881	0.9866	1	0.9947	1	1	1	1	0.9921	1	1	1	0.971	0.9879	1	0.9918	0.9806	1	1	0.9849	1	0.9878	0.9922	0.9891	0.984	0.9907	0.9936	0.9863	1	1	0.9945	1	0.9676	0.9826	1	1	0.9849
MED8	2172	AA	2.1	1	2.2	0	1	0.3209	0.0381	0.1775	0.0635	0.1329	0.0952	0.061	0.1005	0.026	0.1056	0.1055	0.1744	0.0385	0.0357	0.0911	0.0911	0.0986	0	0.0335	0.1064	0.1336	0.1282	0.0699	0.1053	0.1573	0.0581	0.0637	0.0661	0.1255	0.1282	0.14	0.0634	0.0884	0.0616	0.0683	0.1337	0.1074	0.1708	0.1045	0.0724	0.0695	0.0371
SZT2	2175	AT	7			0	1	0.3002	0.0499	0.2291	0.1861	0.2318	0.1442	0.1	0.2851	0.2595	0.1606	0.2692	0.1417	0.1747	0.2069	0.2283	0.1173	0.18	0.1833	0.2233	0.1422	0.1346	0.2653	0.2355	0.2973	0.1281	0.1866	0.101	0.3624	0.2243	0.2309	0.1026	0.1734	0.2712	0.1676	0.0921	0.1541	0.1282	0.1398	0.2052	0.2114	0.1278	0.0925
SZT2	2176	AT	5			0	1	0.4589	0.0466	0.3129	0.1174	0.1313	0.1435	0.1416	0.1537	0.2471	0.1266	0.1534	0.1557	0.3149	0.1221	0.1843	0.1466	0.1511	0.1366	0.1082	0.1497	0.1854	0.1216	0.1468	0.138	0.1374	0.1809	0.1318	0.0778	0.1024	0.1399	0.1273	0.1313	0.3437	0.1462	0.1299	0.0924	0.1531	0.1058	0.1427	0.1248	0.0921	0.1177
SZT2	2177	AT	74			0	1	0.6585	0.0757	0.458	0.6965	0.6369	0.7123	0.7585	0.5612	0.4934	0.7128	0.5775	0.7026	0.5104	0.671	0.5874	0.7361	0.669	0.6801	0.6685	0.7081	0.6799	0.6131	0.6177	0.5647	0.7346	0.6325	0.7672	0.5598	0.6733	0.6292	0.7701	0.6952	0.3851	0.6862	0.778	0.7534	0.7188	0.7543	0.6522	0.6638	0.78	0.7897
HYI	2181	AT	8.3			0	1	0.3842	0.0594	0.141	0.205	0.1255	0.0476	0.0913	0.0918	0.0569	0.0566	0.0405	0.1964	0	0.2394	0.0628	0.1435	0.0645	0	0.1952	0.0753	0.0461	0.2134	0.0641	0.0484	0.1772	0.0861	0.0604	0.0666	0.2737	0.1428	0.1068	0.2126	0.1057	0.182	0.0119	0.0513	0.0467	0.089	0.0422	0.0437	0.0935	0.0777
HYI	2182	AT	9			0	1	0.3842	0.0594	0.859	0.795	0.8745	0.9524	0.9087	0.9082	0.9431	0.9434	0.9595	0.8036	1	0.7606	0.9372	0.8565	0.9355	1	0.8048	0.9247	0.9539	0.7866	0.9359	0.9516	0.8228	0.9139	0.9396	0.9334	0.7263	0.8572	0.8932	0.7874	0.8943	0.818	0.9881	0.9487	0.9533	0.911	0.9578	0.9563	0.9065	0.9223
HYI	2183	AD	8.2	8.1	9	0	0.9927	0.8905	0.0825	0.2111	0.5156		0.4144	0.2679	0.2566	0.1336	0.2536	0.2216	0.3172	0.1374	0.289	0.3423	0.2677	0.2373	0.7454	0.3341	0.3197	0.2646	0.3308	0.3575	0.3034	0.406	0.4499	0.3899	0.3564	0.3433	0.2816	0.3242	0.2628	0.4792	0.3514	0.3461	0.269	0.3255	0.1981	0.3772	0.3323	0.3325	0.3056
HYI	2184	ES	3	2.1	4	1	0.8655	0.6774	0.1021	0.6028	0.8478		0.6172	0.6594	0.6948	0.8328	0.8526	0.7115		0.2833	0.6782	0.6548	0.8604	0.6077	0.4868	0.6962	0.6793	0.7297		0.8478	0.8259	0.8318	0.8391	0.6727	0.836	0.6962	0.942	0.8332	0.8908	0.6948	0.8664	0.676	0.5486	0.7068	0.8837	0.6676	0.7502	0.7432	0.8279
HYI	2185	AD	2.2	2.1	4	1	0.8655	0.4111	0.0487	0.7945	0.8773		0.9315	0.8645	0.8096	0.9363	0.9398	0.9196		0.8048	0.8015	0.8919	0.8767	0.8304	0.7435	0.8871	0.9032	0.844		0.9168	0.9154	0.8972	0.9206	0.8583	0.9008	0.8096	0.9569	0.8919	0.9415	0.8997	0.949	0.893	0.8464	0.8846	0.8921	0.7982	0.8471	0.9036	0.8935
PTPRF	2186	AP	1			0	0.9891	0	0	1	1		1	1	1	1	1	1	1	1	1	1	1	1	1	1	1	1	1	1	1	1	1	1	1	1	1	1	1	1	1	1	1	1	1	1	1	1	1
PTPRF	2188	AP	3.1			0	0.9891	0	0	0	0		0	0	0	0	0	0	0	0	0	0	0	0	0	0	0	0	0	0	0	0	0	0	0	0	0	0	0	0	0	0	0	0	0	0	0	0	0
PTPRF	2189	ES	23	22	24	0	1	0.1227	0.0114	0	0.058	0.0201	0.0027	0.0052	0.0316	0.0209	0.0014	0.0111	0.0084	0.008	0.0024	0	0.0138	0.0072	0.0167	0.0043	0.0071	0.0125	0.0076	0.0144	0.0079	0.0092	0.0326	0.0177	0.033	0.0151	0.008	0.0047	0.008	0.0062	0.0158	0.0407	0.0008	0.0227	0.0029	0.0133	0.0226	0	0.0149
PTPRF	2190	ES	14	13	15	0	1	0.9059	0.1537	0.3209	0.2942	0.3755	0.1206	0.139	0.1824	0.1903	0.4119	0.5489	0.0532	0.4647	0.406	0.2346	0.1421	0.2837	0.3576	0.3928	0.2608	0.2429	0.2448	0.1942	0.3064	0.3805	0.6515	0.2383	0.388	0.1704	0.4115	0.1237	0.3506	0.5015	0.1854	0.6343	0.2826	0.44	0.2646	0.4783	0.3698	0.487	0.5987
PTPRF	2191	ES	12	11	13	0	0.9982	0.2601	0.0164	1	1		1	0.9956	1	0.9927	1	0.9934	1	0.9903	0.9926	1	0.9893	0.9903	0.9727	0.9973	0.9966	0.9886	1	0.9921	1	1	1	0.9977	1	0.9976	0.9854	0.9941	1	0.9963	0.9974	1	0.9954	0.9928	0.985	0.9782	1	0.9957	0.9858
ST3GAL3	2192	AP	1			0	0.8527	1	0.186		0.1002	0	0	0.0948	0.2289	0.1061	0.1683		0.331		0.7808	0	0.69	0.172		0.1705	0.3482			0	0.0298	0.2662	0.1954	0.0818	0.0527	0.2003	0.1674	0.0641	0.3437	0.1393	0.1703	0.09	0.2289		0.3078	0.2503	0.0818	0.0497	0.2289
ST3GAL3	2194	AP	2			0	0.8527	1	0.186		0.8998	1	1	0.9052	0.7711	0.8939	0.8317		0.669		0.2192	1	0.31	0.828		0.8295	0.6518			1	0.9702	0.7338	0.8046	0.9182	0.9473	0.7997	0.8326	0.9359	0.6563	0.8607	0.8297	0.91	0.7711		0.6922	0.7497	0.9182	0.9503	0.7711
ST3GAL3	2195	AT	21			0	1	0.1374	0.0191	0.983	0.9701	0.9798	0.9714	0.9715	0.99	0.9886	0.9923	0.9922	0.9612	1	1	0.9946	0.9528	0.9825	0.994	0.9144	0.9665	0.9372	0.9625	0.9779	0.9725	0.9589	0.9802	0.9837	0.9751	0.9894	0.9686	0.9582	0.9133	0.9649	0.9481	0.9963	1	0.9859	0.9667	0.9772	0.9419	0.9684	0.9538
ST3GAL3	2197	AT	18			0	1	0.1374	0.0191	0.017	0.0299	0.0202	0.0286	0.0285	0.01	0.0114	0.0077	0.0078	0.0388	0	0	0.0054	0.0472	0.0175	0.006	0.0856	0.0335	0.0628	0.0375	0.0221	0.0275	0.0411	0.0198	0.0163	0.0249	0.0106	0.0314	0.0418	0.0867	0.0351	0.0519	0.0037	0	0.0141	0.0333	0.0228	0.0581	0.0316	0.0462
ST3GAL3	2198	AA	19.1	16.2	19.2	0	0.9945	0.0487	0.0058		1	1	1	1	1	1	1	1	1	1		1	1	1	1	0.97	1	1	0.9856	1	1	0.9657	1	1	1	1	1	1	1	1	1	1	1	0.9777	1	1	1	1	1
ST3GAL3	2199	ES	19.1:19.2:20	16.2	21	0	1	0.3262	0.0228	0.6738	0.9419	1	1	1	1	0.9871	0.9837	1	0.9944	1	1	0.9827	0.9874	1	0.984	1	0.9771	1	1	1	0.9864	1	1	1	0.9532	1	0.9919	1	1	0.9826	1	0.9812	0.9765	1	0.9482	1	1	1	1
ST3GAL3	2201	ES	16.1:16.2:19.1:19.2:20	15.1	21	0	0.8873	0.6689	0.0859	0.3311	0.5226		0.8872	1	1	1	1	1	1	1	1	0.7594	1	1	1	1	1		1	1	1	0.8972	0.808		1	1	1		1	1	0.5598	1	1	1	1	1	0.736	1	1
ST3GAL3	2202	ES	16.2:19.1:19.2:20	15.1	21	0	1	0.6342	0.0284	0.3658	0.979	1	0.9773	1	1	1	1	1	1	1	1	0.9811	1	1	1	1	1	1	1	1	1	0.985	0.9873	0.9669	1	1	1	1	1	1	0.9755	1	1	1	1	1	0.9741	1	1
ST3GAL3	2210	ES	16.2	15.1	19.1	0	0.9945	0.0837	0.0086		1	1	1	1	1	1	1	1	1	1		1	1	1	1	1	1	1	1	1	1	1	1	1	0.9638	1	1	1	1	1	1	1	1	0.975	1	1	1	1	1
ST3GAL3	2211	AA	16.1	15.1	16.2	0	0.9673	0.4783	0.0618	0	0.0241		0.1652	0.1001	0.1238	0.1524	0.1011	0.0187	0.09	0.0919		0.0601	0.1153	0.0849	0.0825	0.0632	0.0778	0.0632	0.1344	0.0691	0.0739	0.1213	0.0532	0.0358	0.0376	0.0958	0.0606	0	0.1049	0.2139	0.0323	0.1415	0.1158	0.1339	0.1864	0.1292	0.0724	0.0255	0.0874
ST3GAL3	2212	ES	14:15.1:16.1:16.2:19.1:19.2:20	13	21	0	0.8	0.8082	0.1139		1		1	1	1	1	1	1	1	1		1	1	1	1		0.8666		1	1	1	1	1		1	1	1		1	1	1	0.9381	0.8122	1	1	1	1	1	1
ST3GAL3	2213	ES	14:15.1:16.2:19.1:19.2:20	13	21	0	0.9982	0.0957	0.0118		1	1	1	1	1	1	1	1	1	1	1	1	1	1	1	1	0.9872	1	1	1	1	1	1	1	1	1	1	1	1	1	1	0.9883	0.9744	1	1	1	1	1	1
ST3GAL3	2223	ES	14:15.1:16.2	13	19.1	0	0.9982	0.1247	0.0096		1	1	1	1	1	1	1	0.9833	1	1	1	0.9883	1	0.9924	1	1	1	1	1	1	1	0.9849	1	1	1	1	1	1	1	1	1	1	0.9714	1	1	1	1	1	0.9834
ST3GAL3	2229	ES	13:14:15.1:16.1:16.2:19.1:19.2:20	9	21	0	0.7764	0.4108	0.0242		1		1	1	1	1	1	1	1	1		1	1	1	1		1		1	1	1	1	1		1	1	1		1	1	1	1	1	1	1	1	1	1
ST3GAL3	2231	ES	12:13:14:15.1:16.2:19.1:19.2:20	9	21	0	0.7545	0.4056	0.0246		1	1	1	1	1	1	1	1	1	1		1	1	1	1	1	1		1	1	1		1			1	1		1	1		1		1	1	1		1
ST3GAL3	2232	ES	10:13:14:15.1:16.2:19.1:19.2:20	9	21	0	0.9818	0.2466	0.014		1	1	1	1	1	1	1	1	1	1	1	1	1	1	1	1	1	1	1	1	1	1	1	1	1	1	1	1	1	1	1	1	1	1	1	1	1	1	1
ST3GAL3	2233	ES	13:14:15.1:16.2:19.1:19.2:20	9	21	0	0.9964	0.053	0.0025		1	1	1	1	1	1	1	1	1	1	1	1	1	1	1	1	1	1	1	1	1	1	1	1	1	1	1	1	1	1	1	1	1	1	1	1	1	1	1
ST3GAL3	2271	ES	11:12:00	9	13	0	0.9727	0.2586	0.033	0.0377	0.0168	0.0213	0	0.0121	0	0	0	0	0.0524	0.0707		0	0.0174	0	0	0	0	0.0187	0.084	0	0.012	0.0192	0.0277	0.0829	0.0891	0.0287	0.0055	0.0696	0.0998	0.0464	0.043	0	0.0044	0.0255	0.0355	0.0417	0.0694	0.0178	0.0339
ST3GAL3	2272	ES	12	9	13	0	0.9709	0.5447	0.0938	0.0649	0.0725	0.1118	0.0515	0.0212	0.2029	0.1927	0.0607	0.1902	0.2821	0.1399		0.063	0.1139	0.1753	0.1092	0.0769	0.056	0.0391	0.1377	0.2139	0.2217	0	0.3423	0	0	0.0595	0.0581	0	0.1426	0.1008	0	0.2577	0.0078	0.2085	0.1372	0.088	0	0.0643	0
ST3GAL3	2273	ES	10	9	13	0	0.9855	0.6502	0.1128	0.094	0.0414	0.2718	0.0609	0.0609	0.4007	0.257	0.1265	0.1962	0.2982	0.2431	0.1719	0.1267	0.1044	0.2685	0.3503	0.1424	0.1565	0.1099	0.4089	0.3052	0.3164	0.1893	0.3803	0.1755	0.1835	0.1474	0.0839	0.1324	0.4143	0.2137	0.0876	0.317	0.0862	0.2431	0.2668	0.2933	0.165	0.0775	0.0662
ST3GAL3	2291	ES	09:10:00	6	13	0	0.7727	0.5517	0.0724			1	1	1	1	1	0.8364	1	1	1		0.8755	1	1	1	1	0.9017		1	1	1	1	1	1	1	1	1	1	1	1	1	1	0.6875	1	1	1	1
ST3GAL3	2294	ES	7.1:7.2:9	6	13	0	0.7618	0.7059	0.071		1	1		1	1	1	0.8625		1			0.8337	1	1	1	1	0.9023			1	1	1	1		1	1	1	1	1				0.8384	1			1	1	1
ST3GAL3	2296	ES	9	6	13	0	0.9964	0.1552	0.0127	1	1	1	1	1	1	1	0.9797	1	1	1	1	0.9825	1	1	1	1	0.9866	1	1	1	1	1	1	1	1	1	1	1	1	1	1	1	0.9664	1	1	1	1	1	1
ST3GAL3	2297	ES	7.1:7.2:8	6	9	0	0.9382	0.2683	0.0279	0.0375	0.0097	0.0061	0.0112	0.01	0.0093	0.058	0.0055	0	0.0086	0.0477		0.0032	0.0409	0.0021	0	0	0.0049	0.0832	0.043	0.0101	0.0015	0.0042	0	0	0.015	0	0.0034	0.0105	0.0089	0.0284	0.0239	0.0228	0.0051	0	0	0	0	0.0089	0
ST3GAL3	2298	ES	7.2:8	6	9	0	0.9291	0.1262	0.0091	0	0.0151	0.0082	0	0.0154	0.0124	0	0.0074	0	0.0115			0.0043	0	0.0028	0	0	0.0072	0	0	0.0135	0.002	0.0056	0	0	0.0201	0	0.0046	0.0141	0.0119	0.0378	0	0	0.0068	0	0	0	0	0.012	0
ST3GAL3	2299	ES	7.1:7.2	6	9	0	0.9727	0.5136	0.0836	0.0569	0.2747	0.0653	0.0172	0.1623	0.2499	0.1605	0.1595	0.0569	0.1581	0.072		0.0996	0.1564	0.1829	0.1196	0.1357	0.1216	0.1235	0.0528	0.1241	0.1566	0.1803	0.3145	0.0367	0.1699	0.1017	0.1456	0.1763	0.3083	0.0636	0.0369	0.0178	0.1699	0.1945	0.1279	0	0.2074	0.1125	0.2066
ST3GAL3	2300	ES	7.2	6	9	0	0.9255	0.148	0.0109	0	0	0	0	0	0	0	0	0	0			0	0	0	0	0	0	0	0	0	0	0	0	0	0	0	0	0	0	0	0	0	0	0	0	0	0	0	0
ST3GAL3	2302	ES	5.1:5.2	4	6	0	0.9	0.2941	0.0419	0	0.0535	0.0222	0.0075	0.0413	0	0	0	0.0058	0.0462	0.0313	0	0.0242	0.0714	0.0521	0.0607	0.147	0		0	0	0.0151	0	0.0197	0.0793	0.0937	0	0.0142	0.0413	0.0333		0.0508	0.0159	0	0.147	0.0088	0	0.0511	0.0078	0
ST3GAL3	2303	ES	5.1	4	6	0	0.8945	0.3967	0.0367	0	0.0541	0.0113	0.0076	0	0.033	0.0893	0.0665	0.0059	0.0467	0.0316	0	0.0245	0.0722	0	0	0	0.0497		0	0	0.0444	0	0.0573	0	0.0947	0.0801	0.0143	0.0417	0.0337		0.0514	0.0161	0		0.009	0	0.0516	0.0078	0.0222
ST3GAL3	2424	ES	4:6:9:10	3.1	13	0	0.7691	0.4047	0.0357			1	1	1	1	1	1	1	1	1		1	1	1	1	1	1		1	1	1	1	1	1	1	1	1	1	1	1		1	1	1	1	1	1
ST3GAL3	2464	ES	04:06:09	3.1	13	0	0.9927	0.1183	0.0068	1	1	1	1	1	1	1	1	1	1	1	1	1	1	1	1	1	1	1	1	1	1	1	1	1	1	1	1	1	1	1	1	1	1	1	1	1	1	1	1
ST3GAL3	2480	ES	4	3.1	6	0	0.98	0.4225	0.0686	0.8402	0.8447	0.8954	0.9119	0.8913	0.8777	0.9611	0.8243	0.9621	0.9018	0.7939	0.8785	1	0.8432	0.9507	1	1	0.9567	1	1	0.8176	0.9199	0.9382	0.955	0.9313	0.8487	0.9591	0.9859	0.8679	0.8181	0.7783	0.8373	0.8474	1	0.9143	0.8749	0.9178	1	0.8678	0.8396
ST3GAL3	2482	AD	3.2	3.1	4	0	0.9145	0.4237	0.078		0.1572	0.1331	0.0429	0.0474	0.2053	0.1274	0.1308	0.1299	0.0487	0.0403		0.1215	0.0988	0.1052		0.1324	0.0272	0.1548	0.1469	0.2742	0.1299	0.0194	0.0391	0.0325	0.2514	0.0174	0.098	0.1437	0.1519	0.0694	0.2486	0.4017	0.2235	0.2117	0.1419	0.2235	0.2637	0.2374	0.1355
ARTN	2483	AP	4.1			0	0.9509	0.9253	0.1208	0.3011	0.3993	0.2815		0.3444	0.3323	0.3866	0.2066	0.2916	0.331	0.3576	0.3207	0.2985	0.3989	0.344	0.2947	0.5908	0.4302	0.3619	0.3379	0.3846	0.3774	0.4577	0.4958		0.2901	0.7744	0.4436	0.4793	0.4453	0.3953	0.4288	0.3839	0.2748	0.6217	0.4201	0.4428	0.4763	0.4556	0.4265
ARTN	2485	AP	3.1			0	0.9509	0.6608	0.0999	0.4464	0.4185	0.6608		0.2872	0.2217	0.3131	0.4595	0.2021	0.4365	0.1325	0.3566	0.2271	0.4169	0.3188	0.2048	0.0821	0.2065	0.4539	0.4215	0.2534	0.2623	0.3163	0.2036		0.192	0.0957	0.3238	0.3272	0.324	0.157	0.1735	0.2147	0.1375	0.1508	0.3667	0.2363	0.2604	0.2126	0.2635
ARTN	2486	AP	1			0	0.9509	0.9768	0.133	0.2525	0.1822	0.0577		0.3683	0.446	0.3003	0.3339	0.5063	0.2324	0.5099	0.3228	0.4744	0.1842	0.3372	0.5005	0.3271	0.3632	0.1842	0.2406	0.362	0.3603	0.226	0.3006		0.5179	0.1299	0.2326	0.1935	0.2307	0.4477	0.3976	0.4014	0.5877	0.2275	0.2133	0.3209	0.2633	0.3318	0.31
ARTN	2489	AA	3.2	2	3.3	0	0.7982	0.5916	0.0983		0.6786	0.7846		0.6591	0.8391	0.6439	0.6582	0.7147	0.81	0.8477		0.7314	0.687	0.7372	0.6171	0.7648	0.7994	0.8265	0.723	0.8584	0.7791	0.562	0.8014		0.7319		0.6992	0.6248	0.6057	0.5396	0.8271	0.6969	0.7798	0.5943	0.665	0.6557	0.6812	0.7899
ARTN	2490	ES	2	1	3.2	0	0.8455	0.2632	0.0289		1	1		1	0.9866	1	0.9497	0.9878	1	1		1	0.992	0.994	1	1	0.9929	1	1	0.9627	0.9744	0.9671	1		0.977		0.9906	1	1	1	1	0.9926	0.9642	0.8985	1	1	0.985	0.8946	1
IPO13	2491	AP	16.1			0	1	0.6016	0.0818	0.2211	0.1122	0.2986	0.0604	0.0666	0.0375	0.0365	0.0481	0.0183	0.1663	0	0.0462	0.0148	0.227	0.0673	0.0093	0.0079	0.0277	0.3021	0.2484	0.0719	0.0803	0.1634	0.0516	0.0556	0.0359	0.0434	0.1746	0.3337	0.1229	0.1456	0.0304	0.0401	0.0424	0.0801	0.223	0.0778	0.1027	0.0742	0.1046
IPO13	2492	AP	1			0	1	0.6016	0.0818	0.7789	0.8878	0.7014	0.9396	0.9334	0.9625	0.9635	0.9519	0.9817	0.8337	1	0.9538	0.9852	0.773	0.9327	0.9907	0.9921	0.9723	0.6979	0.7516	0.9281	0.9197	0.8366	0.9484	0.9444	0.9641	0.9566	0.8254	0.6663	0.8771	0.8544	0.9696	0.9599	0.9576	0.9199	0.777	0.9222	0.8973	0.9258	0.8954
DPH2	2496	ES	4	3.2	5	0	1	0.1019	0.0099	0.8981	0.9907	1	1	0.9857	0.9919	0.9872	1	0.9526	1	1	0.9879	0.9736	1	1	1	1	1	0.971	0.9873	1	1	1	1	1	1	1	1	0.9884	0.9904	1	0.9884	0.9873	1	1	0.9861	0.9849	0.9823	1	1
DPH2	2497	ES	3.1:3.2	2.1	4	0	0.9636	0.7034	0.1141		1		1	1	1	0.7899	0.8663	1	0.8694		1	0.8722	0.9663	0.8123	1	0.9285	0.7444	1	0.861	0.7399	0.708	0.9417	0.8453	1	0.6761	0.9288	0.8453	0.9182	0.893	0.7654	0.9245	0.7726	0.7886	1	0.8999	1	1	1	0.9422
DPH2	2498	ES	2.2:3.2	2.1	4	0	0.8873	0.8743	0.1611	1	1		1	1	1	0.6243	0.826		0.6033	0.6047	1	0.5938	0.9715	0.7704	1	0.844		1	0.768	0.639	0.6985	0.823	0.856	1	0.4778	0.8692	0.8388	0.9162	0.8932		0.8671	0.6677	0.5489	1	0.8574	1	1	1	0.911
DPH2	2499	ES	3.2	2.1	4	0	1	0.4613	0.029	1	1	1	1	1	1	0.9855	0.9807	1	0.9721	0.9618	1	0.9463	0.9861	0.9762	1	0.9807	0.9714	1	0.9495	0.8817	0.8638	0.9817	0.9637	1	0.9162	0.9937	0.9583	0.9417	0.9796	0.9785	0.9929	0.9794	0.9699	1	0.9357	1	1	1	0.9914
DPH2	2500	AA	3.1	2.1	3.2	0	0.9945	0.809	0.0887	0.1679	0.0814	0.2323	0.063	0.1138	0.1644	0.0545	0.1186	0.1043	0.1679	0.0445	0.0975	0.2916	0.2945	0.1015	0.0991	0.2184	0.0838	0.2323	0.2588	0.284	0.2801	0.2421	0.1804	0.1968	0.1679	0.0803	0.2004	0.4177	0.1559	0.0703	0.0869	0.0732	0.1116	0.0473	0.3934	0.1634	0.0599	0.0838	0.1332
DPH2	2501	AD	2.2	2.1	3.2	0	0.9945	0.5203	0.0777	0.2761	0.0272	0.1324	0.0367	0.0649	0.0742	0.0255	0.0923	0.0257	0.0455	0.0658	0.0893	0.0839	0.3356	0.0839	0.2725	0.1097	0.0053	0.079	0.1622	0.2016	0.2732	0.0871	0.1998	0.2004	0.0839	0.0442	0.1979	0.4159	0.1616	0.021	0.0509	0.0474	0.0414	0.0499	0.3088	0.0937	0.1139	0.0332	0.0923
DPH2	2502	AD	1.3	1.2	2.1	0	0.9945	0.0363	0.0032	1	1	1	1	1	1	1	1	1	1	1	1	1	1	1	1	1	0.9898	1	1	1	1	1	1	1	1	1	0.9927	1	1	1	1	1	1	1	1	1	1	1	1
DPH2	2503	AD	1.2:1.3	1.1	2.1	0	1	0.2284	0.0375	1	0.9233	1	0.8048	0.9168	0.8892	0.9055	0.9245	0.9519	0.9316	0.9649	0.9175	0.9092	0.9498	0.9449	0.9172	0.9416	0.9459	1	0.9482	0.9251	0.919	0.9343	0.8707	0.8978	0.9467	0.9715	0.9083	0.9388	0.9693	0.8647	0.9244	0.891	0.8671	0.9366	0.9085	0.8994	0.9425	0.9643	0.9439
ATP6V0B	2505	AP	1.1			0	1	0.1601	0.0273	1	0.965	0.9276	1	0.957	0.9956	0.9964	0.9878	0.9847	0.9631	1	0.9922	0.9913	0.8978	0.9887	0.9883	0.9908	0.9586	0.9433	0.9853	0.9599	0.9869	0.9534	1	0.9566	0.9755	0.9738	0.8826	0.9189	0.9515	0.9933	0.9667	0.9912	1	0.9918	0.9281	0.9903	0.9696	0.9873	0.9527
ATP6V0B	2506	AP	3.1			0	1	0.1601	0.0273	0	0.035	0.0724	0	0.043	0.0044	0.0036	0.0122	0.0153	0.0369	0	0.0078	0.0087	0.1022	0.0113	0.0117	0.0092	0.0414	0.0567	0.0147	0.0401	0.0131	0.0466	0	0.0434	0.0245	0.0262	0.1174	0.0811	0.0485	0.0067	0.0333	0.0088	0	0.0082	0.0719	0.0097	0.0304	0.0127	0.0473
ATP6V0B	2509	RI	7.2	7.1	7.3	0	1	0.1776	0.0269	0.0186	0.0361	0.0323	0.0107	0.0262	0.0099	0.0159	0.0224	0.012	0.0336	0.0023	0.0244	0.0117	0.0942	0.0205	0.0096	0.0343	0.0425	0.07	0.0784	0.0417	0.021	0.0812	0.0278	0.0681	0.0149	0.0418	0.1117	0.0948	0.057	0.013	0.0278	0.0064	0.0122	0.0087	0.0858	0.0243	0.0406	0.0393	0.0653
ATP6V0B	2510	ES	2.1:2.2	1.1	3.2	0	1	0.7489	0.1305	0.0904	0.2294	0.2132	0.1079	0.172	0.1609	0.2054	0.1204	0.0761	0.3401	0.0162	0.1841	0.0383	0.5944	0.1291	0.1469	0.3794	0.2174	0.5249	0.6686	0.1195	0.2997	0.4699	0.1186	0.3111	0.3387	0.2619	0.5155	0.463	0.3023	0.2294	0.5311	0.1328	0.1947	0.0913	0.2688	0.153	0.5507	0.2963	0.2764
ATP6V0B	2511	ES	2.2	1.1	3.2	0	1	0.203	0.024	0.9625	0.9246	0.953	0.9413	0.8787	0.9563	0.9534	0.927	0.9547	0.9499	0.9568	0.9474	0.8517	0.9606	0.9209	0.956	0.9623	0.9274	0.9691	0.975	0.9231	0.9514	0.9626	0.9192	0.9584	0.9706	0.9592	0.9336	0.9469	0.9451	0.9602	0.9728	0.9382	0.9497	0.9495	0.9058	0.9571	0.9848	0.9584	0.9377
ATP6V0B	2512	AD	1.2	1.1	3.2	0	0.9927	0.4248	0.0683	0.078	0	0	0.0142	0.0438	0.0311	0	0.0161	0.0083	0	0.0104	0.0426	0.0174	0.1488	0.0417	0.0108	0	0	0		0	0.0632	0.2168	0.0209	0.2517	0.103	0.0773	0.2264	0.109	0.1129	0	0.1422	0.0373	0.0065	0	0	0	0.337	0	0.0307
ATP6V0B	2513	AA	2.1	1.1	2.2	0	1	0.1145	0.0159	0.0043	0.027	0.0163	0.0082	0.0309	0.0097	0.0139	0.0116	0.0044	0.0296	0.0008	0.0138	0.0078	0.0622	0.0139	0.0087	0.0262	0.0228	0.0389	0.058	0.013	0.0241	0.0367	0.013	0.0204	0.0168	0.0163	0.0772	0.0499	0.0265	0.0131	0.0351	0.0111	0.0138	0.0059	0.0411	0.0088	0.0202	0.0194	0.0272
B4GALT2	2514	AP	2.1			0	0.9109	1	0.2388		0.8775			0.2619	0.2417	0.2322	0.3783	0.1577	0.7351		0.7295	0.692	0.8186	0.6668		0.6842	0.4663	0.4835	0.1529	0.3342	0.1497	0.2863	0.2769	0.0953	0.3665	0.2028	0.3353	0.2521	0.2375	0.4733	0.6515	0.2234	0.1148	0.3415	0.4915	0.2369	0.5756	0.511	0.2146
B4GALT2	2515	AP	1			0	0.9109	1	0.2388		0.1225			0.7381	0.7583	0.7678	0.6217	0.8423	0.2649		0.2705	0.308	0.1814	0.3332		0.3158	0.5337	0.5165	0.8471	0.6658	0.8503	0.7137	0.7231	0.9047	0.6335	0.7972	0.6647	0.7479	0.7625	0.5267	0.3485	0.7766	0.8852	0.6585	0.5085	0.7631	0.4244	0.489	0.7854
B4GALT2	2516	AA	4.1	3	4.2	0	0.9982	0.0176	0.0013	1	1		1	1	1	1	1	1	1	1	1	1	0.9976	1	1	1	0.9967	1	1	1	1	1	0.9965	1	1	1	1	1	1	1	0.9967	1	1	1	1	1	1	1	1
B4GALT2	2517	AD	2.2	2.1	3	0	0.9782	0.7365	0.1242	0.5272	0.8916		1	1	1	1	1	1	1	1	1	1	1	0.9269	1	1	1	0.857	1	1	1	0.8169	1	1	0.9291	0.8169	0.9713	0.9366	0.8625	1	0.899	0.7901	0.7259	0.9058	0.8551	0.7837	1	0.5789	0.777
CCDC24	2518	AP	2			0	0.8745	0.8126	0.1328		0.3097			0.3577	0.2174	0.1784	0.5917	0.35	0.1502		0.3828	0.3014	0.2226	0.2792		0.2965	0.1117	0.35	0.5476	0.4928	0.6001		0.4176	0.2499	0.553		0.2698	0.4586	0.4235	0.3137	0.4117	0.4609	0.4532	0.3276	0.3364	0.3636	0.2492	0.4346	0.4173
CCDC24	2519	AP	3.1			0	0.8745	0.8536	0.1552		0.321			0.5268	0.338	0.5973	0.368	0.4353	0.3892		0.5251	0.3905	0.2768	0.5425		0.461	0.2605	0.4353	0.3405	0.2554	0.3999		0.4544	0.5585	0.447		0.2288	0.4074	0.3292	0.3657	0.483	0.3821	0.4697	0.2037	0.5261	0.3391	0.7045	0.5098	0.278
CCDC24	2520	AP	1			0	0.8745	0.9694	0.1516		0.3693			0.1155	0.4445	0.2244	0.0403	0.2147	0.4606		0.0921	0.3081	0.5005	0.1783		0.2425	0.6279	0.2147	0.1119	0.2518	0		0.128	0.1916	0		0.5014	0.1339	0.2473	0.3206	0.1052	0.157	0.0772	0.4687	0.1375	0.2973	0.0463	0.0555	0.3047
CCDC24	2523	AA	8.1	7.3	8.2	0	0.9727	0.2864	0.0528	0.8961	0.9134		0.8405	0.9422	1	0.9272	0.9758	0.8464	0.8485		0.9591	0.9055	0.9537	0.9148		0.92	0.8907	0.8679	0.9566	0.935	1	0.9055	0.92	0.9516	1	1	0.9726	0.971	0.9363	0.8703	0.9018	0.9184	0.9055	0.8703	1	1	0.8918	0.9387	0.8907
CCDC24	2524	RI	7.2	7.1	7.3	0	0.9873	0.3478	0.0523	0.0846	0.0489	0	0.1736	0.0569		0.0295	0.0546	0.1183	0.1834	0	0.0725	0.0456	0.1135	0.0932	0	0.0403	0.0593	0.1167	0.025	0.1218	0.0403	0.0428	0.112	0.0056	0.062	0	0.0895	0.1308	0.0789		0.1172	0.0506	0.0238	0.029	0.1591	0.0138	0.0951	0.0477	0.0798
CCDC24	2525	RI	6.3	6.2	6.4	0	1	0.7442	0.115	0.2084	0.2319	0.2101	0.4842	0.2887	0.2686	0.0998	0.1836	0.1578	0.2465	0.0978	0.1865	0.1317	0.4659	0.1422	0.2405	0.2068	0.1733	0.479	0.2804	0.2701	0.1498	0.3013	0.2226	0.2122	0.128	0.4144	0.468	0.4006	0.3491	0.8009	0.2663	0.135	0.3533	0.1259	0.4161	0.2274	0.2668	0.206	0.3141
CCDC24	2526	AA	6.1	5	6.2	0	0.8745	0.7206	0.1203		0.1719		0	0.2664		0.262	0.3456	0.3056	0.4089		0.3675	0.2875	0.4682	0.492			0.2296	0.244		0.2714	0.1215	0.361	0.3113	0.2851	0.3675		0.2682	0.4133	0.3456		0.3607	0.5521	0.108	0.244		0.3262	0.3498	0.3259	0.257
CCDC24	2527	ES	4.1:4.2:5:6.1	3.2	6.2	0	0.8964	0.7315	0.161		0.8156	1		0.6453	0.8201	0.9535	1	1	0.8938		1		0.9427	0.8376			0.6468	1	0.8998	1	0.7131	0.8489	0.7779	1	0.8504	0.7089	0.9501	1	0.9294		0.9236	0.7721		1	1	0.6513	0.7986	1	0.7923
CCDC24	2528	ES	4.2:5:6.1	3.2	6.2	0	0.8418	0.8278	0.2017					0.4181	0.7843	0.8965	1	1	0.5196		1	1	0.8409	0.5524			0.625	1	0.7194	1	0.6287		0.6588	1	0.8775	0.6883	0.8717	1	0.798	0.7144	0.8424	0.8728			1		0.5821	1	0.8149
CCDC24	2530	ES	4.1:4.2:5	3.2	6.2	0	0.9891	0.5479	0.0923	1	0.9541	1	1	0.83	0.6965	0.9826	1	1	0.9222	1	1	1	0.948	0.8385	1	1	0.857	1	0.9476	1	0.946	0.9065	0.8831	1	0.9051	0.8597	0.9806	1	0.9605	0.6453	0.9542	0.7283	0.8464	1	1	0.7899	0.8778	1	0.9149
CCDC24	2531	ES	4.2:5	3.2	6.2	0	0.9691	0.7987	0.1429	1	0.8775		1	0.6588	0.6469	0.9597	1	1	0.6041	1	1	1	0.8542	0.5543		1	0.8452	1	0.8379	1	0.9228	0.5437	0.8066	1	0.9233	0.8476	0.9476	1	0.8795	0.7908	0.9023	0.8445	0.897	1	1		0.7164	1	0.9255
CCDC24	2532	AA	4.1	3.2	4.2	0	0.9382	0.7506	0.1565		0.7715			0.7449		0.7363	0.6332	0.2677	0.9021		0.7376		0.7752	0.8275		0.6701	0.5493	0.8325	0.8084	0.6787	0.6304	0.907	0.6701	0.4898	0.4672	0.5493	0.7635	0.7253	0.7933	0.3136	0.7179	0.3601	0.4155	0.7702	0.7822		0.7687	0.4866	0.516
SLC6A9	2533	AP	1			0	0.9455	0.3836	0.0394		0.9383		0.9525	0.9705	0.9057	0.9846	1	0.9351	0.9602	1	1	1	0.9511	0.9653		1	0.9757	0.9276		1	0.9595	0.9838	1	1	1	0.973	0.9509	0.9765	0.8967	0.8907	1	0.941	1	1	0.9626	1	0.9611	0.9771	1
SLC6A9	2534	AP	3			0	0.9455	0.3836	0.0296		0.0617		0.0186	0	0.0943	0	0	0	0.0196	0	0	0	0.0159	0		0	0.0095	0.0724		0	0	0	0	0	0	0	0.012	0.0235	0.0477	0.0428	0	0	0	0	0.0374	0	0	0.0229	0
SLC6A9	2535	AP	4			0	0.9455	0.1953	0.026		0		0.0289	0.0295	0	0.0154	0	0.0649	0.0203	0	0	0	0.033	0.0347		0	0.0148	0		0	0.0405	0.0162	0	0	0	0.027	0.0372	0	0.0556	0.0665	0	0.059	0	0	0	0	0.0389	0	0
SLC6A9	2536	AT	16			0	1	0.267	0.0432	0.8411	0.8421	1	0.9808	0.8574	0.9026	0.9098	0.9225	0.9034	0.9261	0.916	0.7999	0.9115	0.9282	0.9237	0.9373	0.8486	0.9024	0.9171	0.9121	0.927	0.9264	0.9498	0.8532	0.733	0.8024	0.8778	0.9351	0.9111	0.8631	0.8859	0.8915	0.9432	0.8588	0.9729	0.9292	0.936	0.8403	0.872	0.8853
SLC6A9	2538	AT	17			0	1	0.267	0.0432	0.1589	0.1579	0	0.0192	0.1426	0.0974	0.0902	0.0775	0.0966	0.0739	0.084	0.2001	0.0885	0.0718	0.0763	0.0627	0.1514	0.0976	0.0829	0.0879	0.073	0.0736	0.0502	0.1468	0.267	0.1976	0.1222	0.0649	0.0889	0.1369	0.1141	0.1085	0.0568	0.1412	0.0271	0.0708	0.064	0.1597	0.128	0.1147
SLC6A9	2539	RI	14.3	14.2	14.4	0	0.9818	0.1111	0.0178		0.02	0	0.0082	0	0	0.02	0.0129	0	0.016	0	0	0.0066	0.0526	0.0155	0	0	0.0063	0	0	0	0.0232	0.0153	0.0101	0	0	0.012	0.0134	0.0557	0.0153	0.0729	0	0	0.0409	0.0249	0	0	0	0.0638	0
SLC6A9	2540	AA	14.1	13	14.2	0	0.98	0.1729	0.0256		0.9583	0.92	0.9837	0.9773	1	0.9865	1	1	0.9903	1	1	0.9566	0.9742	1	1	0.9306	1	1	0.9134	1	0.9684	0.9815	1	1	1	0.9479	0.9735	0.9758	0.9706	1	1	1	1	1	1	1	1	0.9782	1
SLC6A9	2542	ES	06:07:00	2	8	0	0.9891	0.2559	0.0272		1	1	1	0.9755	1	0.9875	1	1	0.9674	0.9311	1	0.9545	0.9904	0.9864	1		1	1	1	1	0.9777	1	0.9605	1	1	1	0.9767	1	0.9842	1	1	0.9757	1	0.9694	1	1	1	1	1
SLC6A9	2544	ES	6	2	7	0	0.9891	0.2582	0.0303		0.9628	1	0.9609	0.9461	1	0.9862	0.9647	0.9335	0.9895	1	1	0.9729	0.9586	0.9858	1		1	1	1	0.9647	1	0.9351	0.9776	0.8154	0.8724	1	0.9727	1	0.9837	1	0.9758	0.9727	0.8854	1	0.8899	1	0.9568	1	1
DMAP1	2545	RI	1.2:1.3	1.1	1.4	0	0.9964	0.699	0.1124	0.663	1	1	0.7691	0.7806	0.8221	0.8423	0.8512	0.7664	0.8496	0.7429	0.7855	0.9071	0.9492	0.7835	0.6196	0.5448	0.8975	1	0.7549	0.9232	0.9338	0.7295	0.5352	0.8168	0.6931	0.7274	0.8021	0.9022	0.8425	0.9149	0.8841	0.6483	0.753	1	0.6745	0.7652	0.8133	0.7797	0.6397
DMAP1	2546	AA	1.3	1.1	1.4	0	0.9945	0.3462	0.0643	0.8147	1		0.9161	0.9338	0.8287	0.9325	0.9316	0.8453	0.8523		0.8597	0.9324	0.9641	0.8355	0.6538	0.8284	0.9291	1	0.8398	0.9607	0.9513	0.6877	0.7864	0.9011	0.9027	0.9304	0.9012	0.8833	0.9254	0.9277	0.8568	0.8152	0.8339	1	0.7974	0.8505	0.8906	0.877	0.8195
DMAP1	2547	RI	1.2	1.1	1.3	0	0.9964	0.5668	0.1034	0.325	0.4855		0.2466	0.2046	0.5027	0.2964	0.31	0.389	0.5275	0.4026	0.4291	0.4419	0.4299	0.4299	0.4643	0.2123	0.4089	0.4026	0.3835	0.3757	0.4705	0.6064	0.2674	0.3519	0.2018	0.1733	0.3142	0.5769	0.3037	0.4764	0.5729	0.3132	0.4186	0.4607	0.361	0.371	0.3503	0.3601	0.3063
ERI3	2548	AP	1			0	1	0.1896	0.024	0.9779	0.9627	0.8104	0.9919	0.995	0.9835	1	0.9636	0.9923	0.9911	0.9561	0.9909	0.9824	0.9811	0.996	1	0.9799	0.9759	0.9858	0.9598	0.9634	1	0.9705	0.9571	0.9763	0.973	0.9826	0.9782	1	0.9483	0.8843	0.9943	0.9571	0.9936	0.9555	1	0.9947	0.9686	0.9791	0.9867
ERI3	2549	AP	2.1			0	1	0	0	0	0	0	0	0	0	0	0	0	0	0	0	0	0	0	0	0	0	0	0	0	0	0	0	0	0	0	0	0	0	0	0	0	0	0	0	0	0	0	0
ERI3	2550	AP	4			0	1	0.1896	0.024	0.0221	0.0373	0.1896	0.0081	0.005	0.0165	0	0.0364	0.0077	0.0089	0.0439	0.0091	0.0176	0.0189	0.004	0	0.0201	0.0241	0.0142	0.0402	0.0366	0	0.0295	0.0429	0.0237	0.027	0.0174	0.0218	0	0.0517	0.1157	0.0057	0.0429	0.0064	0.0445	0	0.0053	0.0314	0.0209	0.0133
ERI3	2551	ES	9	8	10	1	0.8455	0.097	0.0156	0.9654		0.9615	0.9582	0.9425	0.9678	0.9741	0.9561	0.9702		0.9426	0.9764	0.9788	0.9792	0.9667	0.9519		0.9649		0.9554	0.9626	0.9709	0.974	0.9751	0.9683	0.9746		0.9639	0.9594	0.9552	0.9263	0.9642	0.9636	0.9606	0.9737	0.9592	0.9683		0.9752	0.9683
ERI3	2552	ES	3	2.2	5	0	1	0.2571	0.0211	0.9819	0.9616	0.9394	0.9485	0.9588	0.9582	0.9827	0.9534	0.9562	0.938	0.9121	0.9556	0.9389	0.9687	0.9549	0.9847	0.9864	0.9647	0.965	0.9952	0.9848	0.9782	0.9833	0.9484	0.9716	0.9559	0.978	0.9762	0.9543	0.9667	1	0.9715	0.9744	0.9399	0.9566	0.9685	0.9758	0.9596	0.936	0.9721
RNF220	2553	AP	3			0	0.9982	0.4638	0.066	0	0.0283	0.3061	0	0	0.0482	0	0	0.3289	0.3721	0	0	0	0	0.1569	0	0.0432	0.1923	0	0.0879	0.0425	0	0	0	0	0	0	0	0	0	0.0228	0	0	0	0	0	0	0.017	0.0446	0
RNF220	2554	AP	1.1			0	0.9982	0.7464	0.0795	0	0.0545	0.1415	0	0.011	0.1671	0.0262	0	0.0724	0.0812	0	0	0	0.1118	0.2115	0.1996	0.1387	0.1142	0	0.1807	0.303	0.0993	0.0454	0.0882	0	0.0195	0.0082	0.0052	0.0089	0	0.0351	0.018	0.0209	0.0194	0	0	0.0143	0	0.0227	0
RNF220	2555	AP	7			0	0.9982	0.7535	0.12	1	0.9171	0.5525	1	0.989	0.7847	0.9738	1	0.5987	0.5466	1	1	1	0.8882	0.6316	0.8004	0.8181	0.6935	1	0.7314	0.6545	0.9007	0.9546	0.9118	1	0.9805	0.9918	0.9948	0.9911	1	0.9422	0.982	0.9791	0.9806	1	1	0.9857	0.983	0.9327	1
RNF220	2557	AT	10.2			0	1	0.2484	0.0378	0.1418	0.0983	0.0178	0.0782	0.0823	0.066	0.1231	0.1143	0.0966	0.0832	0.1375	0.084	0.1652	0.093	0.1062	0.0635	0.0523	0.0909	0.1025	0.0916	0.0909	0.1105	0.0856	0.1159	0.078	0.1113	0.086	0.111	0.0935	0.0733	0.1854	0.1065	0.0994	0.1203	0.089	0.0761	0.073	0.1312	0.0799	0.0802
RNF220	2558	AT	17			0	1	0.2484	0.0378	0.8582	0.9017	0.9822	0.9218	0.9177	0.934	0.8769	0.8857	0.9034	0.9168	0.8625	0.916	0.8348	0.907	0.8938	0.9365	0.9477	0.9091	0.8975	0.9084	0.9091	0.8895	0.9144	0.8841	0.922	0.8887	0.914	0.889	0.9065	0.9267	0.8146	0.8935	0.9006	0.8797	0.911	0.9239	0.927	0.8688	0.9201	0.9198
RNF220	2559	AD	9.2	9.1	10.1	0	1	0.6082	0.0782	0.5926	0.5736	0.5789	0.4986	0.494	0.4383	0.6198	0.4688	0.5435	0.6056	0.4462	0.6274	0.4172	0.486	0.5173	0.4728	0.4467	0.4994	0.505	0.5636	0.5039	0.5693	0.4071	0.5181	0.4929	0.4712	0.477	0.3877	0.5096	0.7054	0.5278	0.4284	0.4977	0.6306	0.5325	0.3432	0.4685	0.4444	0.5524	0.4487
TMEM53	2561	AT	5			0	1	0.5253	0.0862	0.4695	0.4488	0.4456	0.3925	0.396	0.278	0.5883	0.4362	0.4277	0.617	0.5236	0.4619	0.5924	0.6183	0.4691	0.3815	0.3126	0.5644	0.5863	0.4199	0.4925	0.5863	0.4132	0.4803	0.2698	0.3881	0.5395	0.6595	0.4782	0.4703	0.5794	0.3878	0.3662	0.6373	0.3111	0.4355	0.3932	0.4532	0.3989	0.4473
TMEM53	2562	AT	3.3			0	1	0.5253	0.0862	0.5305	0.5512	0.5544	0.6075	0.604	0.722	0.4117	0.5638	0.5723	0.383	0.4764	0.5381	0.4076	0.3817	0.5309	0.6185	0.6874	0.4356	0.4137	0.5801	0.5075	0.4137	0.5868	0.5197	0.7302	0.6119	0.4605	0.3405	0.5218	0.5297	0.4206	0.6122	0.6338	0.3627	0.6889	0.5645	0.6068	0.5468	0.6011	0.5527
TMEM53	2563	AA	3.1	2	3.2	0	0.9982	0.4995	0.0862	0.7475	0.7023	0.9267	0.9253	0.7596	0.7984	0.815	0.8572	0.7875	0.6359	0.9175	0.934	0.8376	0.6026	0.9284	1	0.7165	0.7885	0.7891	0.7639	0.7667	0.5702	0.815	0.7559	0.796	0.7797	0.6759	0.8817	0.9458	0.7712	0.706	0.7029	0.8389	0.8518	0.8216	0.8878	0.8291	0.6469	0.9626	0.7106
TMEM53	2568	ES	2	1	4	0	0.8764	0.665	0.1043	1	0.7934				0.6383	0.9174	0.8883		0.7491			0.936	0.582	0.8927	1	1	0.7834	1	1	0.8893	0.758	0.7615	0.8958	0.6856	1	0.9072	0.9285	1	1	0.8539	1	0.6544	0.8641	0.8468	0.8748	1	1	0.8919	0.8365
KIF2C	2573	AP	3.1			0	0.9455	0.1511	0.0116	0	0	0	0	0	0	0	0	0	0.0157	0	0	0	0	0	0	0	0	0	0	0	0	0	0	0	0	0	0	0	0.0219	0.0739	0	0	0	0	0	0	0	0	0
KIF2C	2574	AP	1			0	0.9455	0.1511	0.0116	1	1	1	1	1	1	1	1	1	0.9843	1	1	1	1	1	1	1	1	1	1	1	1	1	1	1	1	1	1	1	0.9781	0.9261	1	1	1	1	1	1	1	1	1
KIF2C	2575	ES	7	6	8	0	0.9618	0.3504	0.0384	1	1	1	0.9578	0.9616	0.9726	0.8945	0.9814	0.9526	0.9288	1	0.9907	0.988	0.9413	0.9164	0.9698	0.9764	0.9471	0.9869	0.983	0.95	0.9551	0.9752	0.9292	0.9562	0.953	0.9929	0.9828	1	0.9549	0.979	0.9611	1	0.9908	0.9797	0.9633	0.9542	0.8798	0.9505	0.9424
RPS8	2577	AD	3.2	3.1	4	0	1	0.0173	0.0022	0.9924	0.9959	0.9955	0.9929	0.992	0.996	0.9968	0.9944	0.9951	0.9938	0.9948	0.9922	0.9925	0.9926	0.9956	0.9963	0.9952	0.995	0.9959	0.9939	0.9943	0.9909	0.9945	0.9924	0.9938	0.9968	0.9957	0.9913	0.9953	0.9953	0.9968	0.9853	0.9946	0.9889	0.9944	0.9874	0.9906	0.9959	0.9917	0.9919
PLK3	2578	ES	13	12	14	1	0.9018	0.4966	0.0736	0.8914	0.9196	0.6631		0.9337	0.905	0.9207	0.8997		0.8393	0.9086		0.8306	0.796	0.8775			0.8573	0.905		0.5382	0.8735	0.9424	0.853	0.905	0.8477	0.8884	0.8639	0.8689	0.9271		0.879	0.8201	0.8969	0.9151	0.8747	0.8923	0.8793	0.892	0.9012
BTBD19	2581	AT	7.2			0	0.9273	0.5678	0.0456		0		0	0	0	0	0	0	0	0	0		0	0		0	0	0	0	0	0	0	0		0	0	0.0423	0	0	0	0	0	0	0	0	0	0	0	0
BTBD19	2582	AT	9			0	0.9273	0.5678	0.0456		1		1	1	1	1	1	1	1	1	1		1	1		1	1	1	1	1	1	1	1		1	1	0.9577	1	1	1	1	1	1	1	1	1	1	1	1
PTCH2	2586	AT	22.2			0	0.9709	0.8196	0.0789		0.9726		0.9442	0.8461	0.9049	0.9442	0.9331	0.9269	0.9755	0.6789	1	0.6954	0.9103	0.9688		0.8988	0.9269	0.9516	0.8839	0.9128		1	0.9756	0.8638	0.8712	0.9181	0.7772	0.9889	0.9269	0.7302	0.927	0.9682	0.963	0.8988	0.9612	0.8435		0.8962	0.8509
PTCH2	2587	AT	23			0	0.9709	0.8196	0.0789		0.0274		0.0558	0.1539	0.0951	0.0558	0.0669	0.0731	0.0245	0.3211	0	0.3046	0.0897	0.0312		0.1012	0.0731	0.0484	0.1161	0.0872		0	0.0244	0.1362	0.1288	0.0819	0.2228	0.0111	0.0731	0.2698	0.073	0.0318	0.037	0.1012	0.0388	0.1565		0.1038	0.1491
EIF2B3	2588	AT	10.2			0	1	0.3603	0.0602	0.1449	0.2382	0.2708	0.1871	0.2148	0.1621	0.2566	0.1595	0.2651	0.1663	0.2804	0.1579	0.2414	0.2382	0.1744	0.1072	0.2842	0.1691	0.1954	0.2242	0.1615	0.2382	0.2064	0.1229	0.2489	0.133	0.1712	0.1787	0.166	0.2369	0.2766	0.2202	0.1271	0.1385	0.0686	0.2556	0.1647	0.1213	0.1456	0.1734
EIF2B3	2589	AT	12			0	1	0.3603	0.0602	0.8551	0.7618	0.7292	0.8129	0.7852	0.8379	0.7434	0.8405	0.7349	0.8337	0.7196	0.8421	0.7586	0.7618	0.8256	0.8928	0.7158	0.8309	0.8046	0.7758	0.8385	0.7618	0.7936	0.8771	0.7511	0.867	0.8288	0.8213	0.834	0.7631	0.7234	0.7798	0.8729	0.8615	0.9314	0.7444	0.8353	0.8787	0.8544	0.8266
HECTD3	2592	RI	8.2	8.1	8.3	0	0.9945	0.3028	0.0484	0.0412	0.0851	0.1239	0.0348	0.0527	0.0148	0.0375	0.0093	0.0394	0.0799	0	0.0323	0.0093	0.1037	0.0396	0	0.0145	0.0112	0.0249	0.0758	0.0567	0.1219	0.1354	0.0518	0.0424	0.0125	0.0263	0.0554	0.1211	0.0966	0.0377	0.0129	0.0342	0.0064	0.0047	0.1197	0.0124	0.0791	0.0416	0.0232
MUTYH	2593	AP	3			0	1	0.5562	0.1165	0.116	0.2538	0	0.4037	0.1771	0.184	0.4559	0.4	0.2815	0.3862	0.4439	0.0939	0.1886	0.2408	0.3651	0.4716	0.3896	0.3936	0.3842	0.1647	0.2862	0.2865	0.2564	0.35	0.2542	0.3992	0.4139	0.2115	0.3181	0.3118	0.4003	0.1668	0.219	0.2777	0.1872	0	0.2432	0.5078	0.2485	0.2553
MUTYH	2594	AP	2			0	1	0.4594	0.0685	0.0505	0.1383	0.113	0.144	0.2573	0.2807	0.214	0.2441	0.2045	0.1263	0.2902	0.3275	0.2466	0.2175	0.2016	0.2056	0.2548	0.1769	0.1117	0.2153	0.196	0.2966	0.2608	0.1907	0.2611	0.1616	0.1894	0.2095	0.1631	0.2233	0.24	0.2287	0.2864	0.2152	0.204	0.3236	0.2574	0.0949	0.2142	0.2133
MUTYH	2595	AP	1.1			0	1	0.678	0.1201	0.8335	0.608	0.887	0.4523	0.5657	0.5353	0.3301	0.3559	0.5139	0.4875	0.2659	0.5786	0.5648	0.5417	0.4333	0.3228	0.3556	0.4294	0.5041	0.62	0.5178	0.4168	0.4827	0.4593	0.4847	0.4392	0.3967	0.579	0.5188	0.465	0.3597	0.6045	0.4947	0.507	0.6088	0.6764	0.4994	0.3973	0.5373	0.5315
MUTYH	2600	ES	11:12:13:14:15	10	16	0	0.9982	0.15	0.0153	1	0.9687		1	0.9865	1	1	0.9269	0.9528	1	1	1	1	0.9924	0.953	1	1	1	1	1	1	0.9797	1	1	1	1	1	0.9819	0.9735	1	1	1	1	1	1	1	1	0.9823	0.9811	1
MUTYH	2601	ES	08:09:00	7	10	0	1	0.174	0.019	1	1	1	1	1	1	0.9896	1	0.9359	0.9832	1	1	1	1	0.9778	1	1	1	1	1	1	1	1	1	0.9865	1	0.9887	0.9506	0.9587	0.987	1	1	1	1	1	1	1	1	1	1
MUTYH	2603	ES	8	7	9	0	1	0.1093	0.0179	1	1	1	1	1	1	0.9806	1	1	0.9833	1	1	1	0.9744	0.9768	1	1	1	1	1	1	0.9803	1	1	1	0.9602	0.9794	1	0.9855	1	1	1	0.9698	1	1	0.9675	1	0.9146	1	1
MUTYH	2607	ES	6.2:6.3:6.4:6.5	5	7	0	0.7764	0.7134	0.1138				1		1	0.6982			0.8937			1	0.9296	0.6123		1	1		1	1	1	0.7335	0.8687	1	0.8005	1	0.8905	0.8756	1	1	0.9272	1	1	1	1	1			1
MUTYH	2608	ES	6.3:6.4:6.5	5	7	0	0.8455	0.4349	0.0896		1		1	1	1	0.8309	0.8775	0.775	0.925		1	1	0.94	0.5853			1	1	1		1	0.8522	0.9332	1		1	0.7905	0.9477	1	1	0.967	1	1	1	1		0.9093	1	1
MUTYH	2609	ES	6.4:6.5	5	7	0	0.9982	0.3116	0.0316	1	1	1	1	1	1	0.9581	0.9701	0.8783	0.9809	1	1	1	0.9821	0.7928	1	1	1	1	1	1	1	0.9565	0.9733	1	0.9576	1	0.9592	0.9814	1	1	0.987	1	1	1	1	1	0.9466	1	1
MUTYH	2612	ES	6.2:6.3:6.4:6.5:7:8:9:10:11:12:13:14:15:16:17:18	5	19	0	0.8927	0.6603	0.0959				1		1	1		0.5387	0.8782	1		1	0.7554	0.9159		1	0.9349	1	0.807	1	0.6126	0.6403	1	1	1	1	0.8512	0.8821	1	1	1	1	1	0.9349	0.8749	0.8748			1
MUTYH	2613	ES	6.3:6.4:6.5:7:8:9:10:11:12:13:14:15:16:17:18	5	19	0	0.9491	0.6102	0.0766		0.7756	1	1	1	1	1	1	0.7782	0.9135	1	1	1	0.7866	0.9075		1	0.9644	1	0.9009	1	0.688	0.7903	1	1		1	0.7276	0.9509	1	1	1	1	1	0.8753	0.8369		0.9385	1	1
MUTYH	2614	ES	6.4:6.5:7:8:9:10:11:12:13:14:15:16:17:18	5	19	0	1	0.1239	0.0184	1	0.9555	1	1	1	1	1	1	0.8803	0.9777	1	1	1	0.9283	0.9638	1	1	0.9896	1	0.9568	1	0.8919	0.935	1	1	1	1	0.9434	0.9826	1	1	1	1	1	0.9706	0.9672	0.9742	0.9643	1	1
MUTYH	2615	ES	6.5:7:8:9:10:11:12:13:14:15:16:17:18	5	19	0	0.8727	0.6893	0.1091							1	1	0.8327	0.8427	1	1	1	0.6847	0.8598		1	0.9243	1			0.4884	0.8488		1	1	1	0.8822	0.9439	1	1	1	1		0.8461	0.8718	0.8816		1	1
MUTYH	2650	ES	6.2:6.3:6.4:6.5:7:8:9	5	10	0	0.8418	0.6881	0.1337				1		1	0.8721			1	1		0.8807	1	0.71		1	0.8225		1	0.8728	0.7559	1	1	1	0.8872	0.9208	1	1	0.9006	1	1	1	0.6329	1	1	1			0.8834
MUTYH	2651	ES	6.3:6.4:6.5:7:8:9	5	10	0	0.9309	0.6214	0.114		1		1	1	1	0.9358	0.8788	1	1	1	1	0.8627	1	0.6864			0.8976	1	1	0.6701	0.8124	1	1	1		0.9602	1	1	0.9579	1	1	1	0.7387	1	1		0.9402	1	0.9655
MUTYH	2652	ES	6.4:6.5:7:8:9	5	10	0	1	0.2959	0.0363	1	1	1	1	1	1	0.9855	0.9704	1	1	1	1	0.96	1	0.8557	1	1	0.9684	1	1	0.9694	0.9419	1	1	1	0.9779	0.9869	1	1	0.9784	1	1	1	0.9648	1	1	1	0.9653	1	0.9825
MUTYH	2671	AA	6.4	5	6.5	0	0.9855	0.4847	0.0873	1	1	1	1	1	1	0.8984	0.9017	0.6256	0.8998	0.9293	0.8013	0.8326	0.8692	0.8283	1	0.8686	0.894	0.8614	1	1	0.8999	0.7374	1	0.9272	0.9668	0.9381	0.7226	0.7891	0.8913	0.7812	0.9524	0.946	1	0.8746	0.8247	0.8484	1	0.887	0.9173
MUTYH	2672	AA	6.1:6.2:6.3	5	6.4	0	0.9091	0.4638	0.0859		0.2556		0	0.268	0	0.0662	0.2089		0.1345		0.0822	0	0.1026	0	0	0.1256	0.0749	0.0467		0.0942	0	0.111	0.2657	0.068	0.0555	0.0288	0	0.0797	0.1591	0.319	0	0	0.0566	0	0	0.1512	0.1391	0.1351	0
MUTYH	2673	AA	6.2:6.3	5	6.4	0	0.9327	0.5378	0.102		0		0.197	0	0.2326	0.0942	0		0.149	0.0951	0	0.2507	0.2058	0.3117	0	0.139	0.1369	0.0499	0.1737	0.1883	0.1697	0.118	0.1673	0.1972	0.1629	0.1413	0.269	0.1257	0.1757	0.3457	0.1509	0.2928	0.0629	0.3292	0.2092	0.1657	0	0	0.1283
MUTYH	2674	AA	6.3	5	6.4	0	0.9255	0.5923	0.0945		0.139		0.3262	0.3923	0.2547	0.1771	0.1827		0.1949	0.1215	0.1121	0.2089	0.223	0.2714	0	0.0647	0.223	0.1215	0.2933	0.0606	0.212	0.2089	0.2792	0.1886	0	0.244	0.139	0.257	0.3357		0.2789	0.1537	0.094	0.1771	0.1495	0	0.3629	0.1295	0.3349
TOE1	2677	ES	4	3	5	0	1	0.1668	0.023	1	1	0.9512	1	1	0.9581	1	1	1	0.9813	1	1	1	1	0.9848	1	1	0.9714	1	1	0.8679	1	1	1	1	1	0.9772	0.9861	1	0.9672	1	1	1	1	1	1	1	1	1	1
TOE1	2678	ES	2	1	3	0	1	0.1273	0.0147	1	1	1	1	1	1	1	1	1	1	1	0.9763	1	1	0.956	1	0.9532	1	1	0.9564	1	1	1	1	1	1	1	0.9924	1	1	1	1	1	1	1	1	1	1	1	1
TESK2	2681	AT	5			0	1	0.2897	0.0439	0.0885	0.0168	0.0336	0.0314	0.0104	0	0.0211	0.0211	0.0329	0.019	0	0.0548	0.1092	0.0175	0.0212	0.253	0.1957	0.0606	0.0563	0.1835	0.0771	0.0217	0.0219	0.049	0	0.128	0.2897	0.0661	0.0249	0	0.0773	0.075	0.0362	0	0.0588	0.0221	0.0377	0	0.0618	0
TESK2	2682	AT	13			0	1	0.2897	0.0439	0.9115	0.9832	0.9664	0.9686	0.9896	1	0.9789	0.9789	0.9671	0.981	1	0.9452	0.8908	0.9825	0.9788	0.747	0.8043	0.9394	0.9437	0.8165	0.9229	0.9783	0.9781	0.951	1	0.872	0.7103	0.9339	0.9751	1	0.9227	0.925	0.9638	1	0.9412	0.9779	0.9623	1	0.9382	1
TESK2	2683	ES	11	10	12	0	0.9818	0.2212	0.0213	0.8874	1	1	1	0.9914	1	1	1	1	1	1	1	1	1	1		0.961	1	1	1	1	1	1	1	1	0.9625	1	1	0.9856	1	1	0.9724	1	1	1	1	1	1	1	1
TESK2	2684	ES	2	1	3	0	0.9982	0.2308	0.0296	1	1	1	0.9553	0.9909	1	1	1	1	0.9715	1	1	1	1	0.9797	1	1	0.9916	1	1	1	0.9799	0.9611	1	0.9193	1	1	0.9802	0.9835	1	1	1	1	1	1	1	0.9364	1	0.9561	1
CCDC163P	2685	AT	6			0	1	0.1557	0.0274	0.987	0.9153	1	1	0.9201	1	1	1	1	0.9826	1	0.9883	1	0.9468	0.9928	1	1	1	1	0.9791	1	1	0.9682	0.9479	0.989	1	0.9895	0.9745	0.9169	0.966	0.9235	0.9324	1	1	1	0.9309	1	0.94	1	1
CCDC163P	2686	AT	4.2			0	1	0.1557	0.0274	0.013	0.0847	0	0	0.0799	0	0	0	0	0.0174	0	0.0117	0	0.0532	0.0072	0	0	0	0	0.0209	0	0	0.0318	0.0521	0.011	0	0.0105	0.0255	0.0831	0.034	0.0765	0.0676	0	0	0	0.0691	0	0.06	0	0
CCDC163P	2688	ES	5.1:5.2	4.1	6	0	0.7982	0.7105	0.1577	0.715	0.7699		0.857	0.7773	1	1	0.7454		0.8214	0.6765	0.6904		0.7874	0.8169	0.5565	1	0.715	0.653	0.4226	0.5761	0.7061	1	1	1	0.5565	0.715	0.844	0.9328	0.9382	0.7925	0.9252	0.715	0.6141	0.5743	0.9474	1	0.697	0.7404	0.8214
PRDX1	2693	ES	2.2:3:4.1	2.1	4.2	0	1	0.0131	0.0021	0.9956	0.9965	0.9963	0.9954	0.9946	0.9958	0.9952	0.996	0.9961	0.996	0.9956	0.9952	0.9969	0.9953	0.9942	0.995	0.9943	0.9951	0.9979	0.9969	0.9955	0.997	0.9972	0.9945	0.9971	0.9939	0.9955	0.995	0.9955	0.9963	0.995	0.9923	0.995	0.9971	0.9962	0.996	0.9973	0.996	0.9958	0.9938
PRDX1	2694	AD	1.2	1.1	2.1	0	1	0.0285	0.0047	0.0056	0.0089	0.0019	0.0066	0.0069	0.0101	0.0083	0.0067	0.0126	0.0076	0.0038	0.0114	0.0049	0.0102	0.0087	0.0057	0.0089	0.0122	0.0057	0.0084	0.0054	0.005	0.0053	0.0077	0.0021	0.0093	0.0077	0.0084	0.0119	0.0096	0.0282	0.0191	0.0064	0.0102	0.0079	0.014	0.009	0.0086	0.0111	0.0087
AKR1A1	2695	AT	5.2			0	1	0.2458	0.0458	0.0317	0.1076	0.0563	0.0261	0.14	0.017	0.0627	0.0729	0.0476	0.1134	0.015	0.1014	0.0441	0.1492	0.0821	0.0295	0.0975	0.0933	0.099	0.1803	0.1336	0.0821	0.0974	0.0646	0.0779	0.099	0.0597	0.2276	0.1395	0.1374	0.0622	0.0637	0.0189	0.0132	0.0096	0.1473	0.0591	0.102	0.0713	0.077
AKR1A1	2696	AT	10			0	1	0.2458	0.0458	0.9683	0.8924	0.9437	0.9739	0.86	0.983	0.9373	0.9271	0.9524	0.8866	0.985	0.8986	0.9559	0.8508	0.9179	0.9705	0.9025	0.9067	0.901	0.8197	0.8664	0.9179	0.9026	0.9354	0.9221	0.901	0.9403	0.7724	0.8605	0.8626	0.9378	0.9363	0.9811	0.9868	0.9904	0.8527	0.9409	0.898	0.9287	0.923
AKR1A1	2697	ES	7	6	8	1	0.9745	0.2884	0.0488	0.9342	0.9321	0.9224	0.9388	0.8693	0.9114		0.8819	0.9105	0.8953	0.8995	0.9325	0.8954	0.8758	0.9234	0.9366	0.9353	0.9258	0.8823	0.8938	0.7381	0.9441	0.9438	0.9408	0.9548	0.8821	0.9401	0.7514	0.8922	0.8597	0.909	0.8903	0.9362	0.9525	0.9397	0.7626	0.9192	0.8838	0.936	0.9201
AKR1A1	2698	ES	2	1	3	0	1	0.5041	0.068	0.4778	0.4563	0.4601	0.3612	0.3603	0.417	0.5736	0.2332	0.4302	0.3734	0.4275	0.3439	0.2827	0.5403	0.4702	0.3342	0.4476	0.3868	0.5016	0.4455	0.5666	0.4902	0.4088	0.3941	0.409	0.4942	0.3332	0.4692	0.3777	0.4428	0.4292	0.3757	0.4666	0.254	0.4509	0.4515	0.3937	0.712	0.441	0.3297
NASP	2706	ES	9	8	10	0	1	0.851	0.1648	0.4049	0.2882	0.3577	0.4979	0.2715	0.261	0.5766	0.5895	0.4001	0.3064	0.265	0.1218	0.1166	0.1851	0.197	0.2187	0.4762	0.6766	0.3565	0.2644	0.6086	0.4269	0.3306	0.5098	0.2838	0.4127	0.5733	0.4202	0.1712	0.2179	0.4821	0.5677	0.2492	0.3993	0.2495	0.6133	0.6963	0.582	0.6233	0.5378
NASP	2708	ES	7.2	6	8	0	1	0.008	0.0009	1	1	1	1	1	1	1	1	1	1	1	1	1	0.9962	1	1	1	0.9989	1	1	1	1	1	1	1	1	1	1	1	1	1	1	1	1	1	1	1	1	1	1
NASP	2709	AA	7.1	6	7.2	0	1	0.0163	0.0026	0	0	0	0	0	0	0	0	0	0	0	0	0	0	0.0064	0	0	0	0.0041	0	0	0	0	0	0	0.0122	0.003	0.0009	0.0076	0.0017	0	0.0028	0	0	0	0	0.0066	0	0	0
NASP	2717	ES	00:06:07.200000	3	8	0	0.9964	0.5088	0.0397	1	0.9309	1	1	1	1	0.9537	1	1	1	1	1	1	0.9461	1	1	1	0.945	1	1	0.812	1	1	1	1	1	0.9733	0.9947	1	0.9507	0.9676	0.9684	1	1	0.9701	1	1	0.9148	1	0.987
NASP	2719	ES	00:06:07.200000	3	8	0	1	0.0386	0.003	1	0.9949	1	1	1	1	0.9965	1	1	1	1	1	1	0.9897	1	1	1	0.9971	1	1	0.9969	1	1	1	1	1	0.9971	0.9991	1	0.9973	0.9959	0.9989	1	1	0.9976	1	1	0.997	1	0.9973
NASP	2729	ES	5:6:7.2:8:9	3	10	0	0.9964	0.6486	0.0968	1	1	1	1	0.8916	1	1	0.8643	1	0.909	1	0.7914	0.6434	1	0.7589	1	0.6882	0.8859	1	0.7364	0.6948	1	0.8359	1	0.544	0.9002	1	1	1	0.7634	1	0.9361	1	0.7807	0.855	1	1	1	0.8396	0.9742
NASP	2731	ES	6:7.2:8:9	3	10	0	1	0.1617	0.0138	1	1	1	1	0.9876	1	1	0.9788	1	0.9854	1	0.9602	0.9145	1	0.9775	1	0.9853	0.9937	1	0.9841	0.9943	1	0.9745	1	0.9381	0.9892	1	1	1	0.9844	1	0.9977	1	0.981	0.987	1	1	1	0.9911	0.9948
NASP	2742	ES	5:6:7.2:8	3	10	0	0.9945	0.3418	0.0423	1	1	1	1	0.9774	1	1	0.8962	1	0.9794	1	0.9808	0.9716	1	0.9628	1	0.8469	0.8746	1	0.9335	0.7282	1	0.9513	1	0.8453	0.9634	1	1	1	0.9487	1	0.9503	1	0.9041	0.9682	1	1	1	0.8765	0.9823
NASP	2744	ES	00:07:02.200000	3	10	0	1	0.0515	0.0043	1	1	1	1	0.9976	1	1	0.9841	1	0.9968	1	0.9969	0.995	1	0.9972	1	0.9941	0.9929	1	0.9967	0.9951	1	0.9931	1	0.9856	0.9962	1	1	1	0.9972	1	0.9982	1	0.9927	0.9974	1	1	1	0.9934	0.9964
NASP	2751	ES	04:05:00	3	6	0	1	0.0832	0.0082	0	0.0111	0.023	0.008	0	0	0	0.0037	0	0.0044	0	0	0	0.0111	0	0	0.0043	0.008	0.0043	0.0156	0.0091	0	0	0.0046	0	0	0.0138	0.0126	0	0	0	0	0	0	0	0	0	0	0	0.0021
NASP	2752	ES	5	3	6	0	1	0.3304	0.0421	0.1946	0.0752	0.0751	0.1844	0.1131	0.0748	0.0828	0.1481	0.1403	0.1548	0.1329	0.1628	0.1754	0.1833	0.0834	0.0906	0.0377	0.0563	0.1196	0.0529	0.0159	0.128	0.1436	0.1081	0.0906	0.1081	0.1145	0.1791	0.1704	0.0604	0.1258	0.0408	0.1003	0.0769	0.0863	0.1682	0.0821	0.037	0.0511	0.1996
NASP	2753	ES	4	3	6	0	1	0.0951	0.0118	0	0.0116	0.0218	0.0065	0.0113	0	0.0101	0.0026	0.0129	0.0037	0	0.0041	0	0.0086	0.0075	0	0.0026	0.0051	0.0028	0.0058	0.0278	0.0093	0.0171	0.0027	0.0187	0	0	0.007	0.0322	0.0037	0	0.0087	0	0	0.0056	0.0141	0.0066	0	0.0195	0.0018
NASP	2754	ES	2	1	3	0	1	0.747	0.096	0.5785	0.4696	0.5435	0.4056	0.3614	0.2589	0.3616	0.4094	0.3642	0.4422	0.3868	0.3246	0.2614	0.4366	0.3706	0.5375	0.3629	0.1766	0.5391	0.4285	0.3733	0.259	0.4489	0.358	0.461	0.3436	0.323	0.339	0.4448	0.3681	0.6357	0.2108	0.4952	0.3105	0.3638	0.5057	0.5299	0.4218	0.4643	0.4397
GPBP1L1	2769	ES	2	1	3	0	0.9982	0.4492	0.0753	0.8081	0.7751	0.7781	0.8204	0.7652	0.7632	0.8374	0.6482	0.6565	0.7705	0.7943	0.7636	0.7249	0.8193	0.8218	0.7074	0.6584	0.7438	0.8352	0.7251	0.6737	0.7287	0.7514	0.8484	0.785	0.8828	0.8431	0.7869	0.8246	0.6584	0.8076	0.7402	0.7442	0.652	0.8283	0.7505	0.7665	0.8624	0.8374	0.8303
IPP	2771	AT	9.2			0	1	0.4575	0.0531	0.8638	0.9412	0.943	0.9153	0.9248	0.9319	0.9386	0.8943	0.9594	0.9044	0.9556	0.9234	0.9048	0.9335	0.9288	1	0.9659	0.9351	0.9158	0.91	0.9534	0.9455	0.9227	0.9225	0.9409	0.9457	0.8086	0.9361	0.9241	0.939	0.9252	0.9174	0.9678	0.8698	0.9227	0.9018	0.9247	0.9408	0.8315	0.8889
IPP	2772	AT	10			0	1	0.4575	0.0531	0.1362	0.0588	0.057	0.0847	0.0752	0.0681	0.0614	0.1057	0.0406	0.0956	0.0444	0.0766	0.0952	0.0665	0.0712	0	0.0341	0.0649	0.0842	0.09	0.0466	0.0545	0.0773	0.0775	0.0591	0.0543	0.1914	0.0639	0.0759	0.061	0.0748	0.0826	0.0322	0.1302	0.0773	0.0982	0.0753	0.0592	0.1685	0.1111
MAST2	2773	AA	29.1	28	29.2	0	1	0.0073	0.0004	1	1	1	1	1	1	1	1	1	1	1	1	1	1	1	1	1	1	1	1	1	1	1	1	1	1	1	1	1	1	1	1	1	1	1	1	1	1	1	1
MAST2	2774	RI	25.2	25.1	25.3	0	0.9964	0	0	1	1	1	1	1	1	1	1	1	1	1	1	1	1	1	1	1	1	1	1	1	1	1	1	1	1	1	1	1	1	1	1	1	1	1	1	1	1	1	1
MAST2	2775	ES	10	9	11	0	0.9964	0.1645	0.0177	1	1	1	1	1	0.9351	1	0.964	1	1	1	1	1	0.9461	1	1	1	1	1	1	1	1	0.9822	1	1	1	0.9528	1	1	0.9603	1	0.9711	1	0.976	0.9715	0.9708	1	1	1	1
PIK3R3	2776	AP	2.1			0	1	0.5221	0.0436	0	0.0375	0.0721	0	0.0094	0.0732	0.1034	0.0499	0.0405	0.0672	0.0846	0.0519	0.0174	0.0304	0.0539	0.0304	0	0.0309	0.0343	0	0.1033	0.0426	0.0406	0.0246	0.1001	0.0577	0.0654	0.0471	0.0366	0.1152	0.1233	0.0266	0.0259	0.0318	0.0115	0.1449	0.1124	0.0737	0	0.0442
PIK3R3	2777	AP	3.1			0	1	0.5221	0.0451	1	0.9534	0.9279	1	0.9906	0.9268	0.8966	0.9501	0.9595	0.9328	0.9154	0.9481	0.9826	0.9696	0.9461	0.9696	1	0.9691	0.9657	1	0.8967	0.9574	0.9462	0.9754	0.8999	0.9423	0.9346	0.9529	0.9634	0.8848	0.7115	0.9734	0.9741	0.9682	0.9885	0.8551	0.8876	0.9263	1	0.9558
PIK3R3	2778	AP	1			0	1	0.1652	0.0083	0	0.0091	0	0	0	0	0	0	0	0	0	0	0	0	0	0	0	0	0	0	0	0	0.0132	0	0	0	0	0	0	0	0.1652	0	0	0	0	0	0	0	0	0
PIK3R3	2779	ES	10	9	11	0	0.9927	0.2735	0.0231	1	1	1	1	0.9876	1	1	0.9576	1	0.9689	1	1	0.9556	1	0.9667	1	1	1	1	1	1	1	1	1	1	1	1	1	1	1	1	0.9901	1	1	1	1	1	1	1	1
POMGNT1	2781	AP	2			0	1	0.8592	0.1455	0.5961	0.8887	0.6775	0.5075	0.7604	0.8885	0.8009	0.7437	0.9243	0.889	0.6935	0.9513	0.8981	0.7937	0.8659	0.9363	0.8116	0.9275	0.6025	0.9024	0.9369	0.9042	0.6143	0.8313	0.9928	0.9189	0.9646	0.9538	0.7925	0.8184	0.6709	0.5622	0.6302	0.7821	0.9145	0.5371	0.8781	0.7734	0.7376	0.9016
POMGNT1	2782	AP	4			0	1	0.3212	0.0183	0	0	0	0	0	0	0.0064	0.0094	0	0.0152	0	0	0	0.0066	0.006	0	0.015	0.0219	0.009	0	0	0.0241	0	0	0	0	0.0089	0.0041	0.0447	0	0.065	0.0072	0	0	0	0.012	0	0.0086	0.0093	0
POMGNT1	2783	AP	1			0	1	0.8592	0.1424	0.4039	0.1113	0.3225	0.4925	0.2396	0.1115	0.1927	0.2469	0.0757	0.0957	0.3065	0.0487	0.1019	0.1998	0.1281	0.0637	0.1734	0.0507	0.3884	0.0976	0.0631	0.0717	0.3857	0.1687	0.0072	0.0811	0.0265	0.0421	0.1627	0.1816	0.2641	0.4306	0.3697	0.2179	0.0855	0.4509	0.1219	0.2181	0.2531	0.0984
POMGNT1	2784	RI	22.2	22.1	22.3	0	1	0.3001	0.0417	0.9903	0.9933	0.9762	0.874	0.9872	0.9902	0.9728	0.9333	0.9604	0.9776	0.9848	0.9835	0.9903	0.9649	0.9707	0.9325	0.9488	0.9789	0.9349	0.9845	0.926	0.9925	0.9816	0.8979	0.9957	0.8883	0.9521	0.9568	0.973	0.9851	0.933	0.9573	0.9593	0.8892	0.9904	0.9679	0.8828	0.9599	0.9768	0.902
POMGNT1	2785	AD	21.2	21.1	22.1	0	1	0.0553	0.004	1	1	1	1	1	1	1	1	1	1	1	1	1	1	1	1	1	1	1	1	1	1	1	1	1	1	1	1	1	0.9963	1	1	1	1	1	1	1	1	1	1
POMGNT1	2786	RI	12.4	12.3	12.5	0	1	0.4891	0.0644	0.0612	0.0925	0.0216	0.0027	0.1226	0.0121	0.0244	0.0568	0.0122	0.0381	0.0069	0.0253	0.0226	0.112	0.026	0	0.035	0.0408	0.0451	0.0314	0.018	0.0509	0.0817	0.0248	0.0378	0.0135	0.0428	0.0707	0.1645	0.1077	0.0428	0.0503	0.0299	0.005	0.0248	0.2022	0.0226	0.0511	0.0398	0.0373
POMGNT1	2787	RI	12.2	12.1	12.3	0	1	0.5091	0.0728	0.0581	0.1138	0.0683	0.0173	0.1729	0.0192	0.0203	0.0893	0.0192	0.0781	0.0025	0.0301	0.0089	0.1566	0.0355	0	0.0326	0.0692	0.1334	0.0468	0.0615	0.0505	0.2074	0.0251	0.0528	0.0221	0.0616	0.0929	0.2501	0.173	0.0265	0.0406	0.021	0.0186	0.0239	0.1685	0.0372	0.0848	0.0508	0.0426
POMGNT1	2788	ES	9	8	10	0	1	0.0636	0.0065	1	1	1	1	1	1	1	1	0.9922	0.9918	1	0.9956	1	1	1	0.9364	1	1	0.9823	1	1	1	1	1	0.9934	1	0.9914	0.9877	1	0.9913	1	1	1	0.9949	1	1	1	0.9919	1	0.9959
RAD54L	2789	RI	1.2	1.1	1.3	0	0.9509	0.0337	0.0015	1	1	1	1	1	1	1	1	1	1	1	1	1	1	1	1	1	1	1	1	1	1	1	1	1	1	1	1	1	1	1	1	1	1	1	1	1	1	1	1
NSUN4	2791	AP	2.1			0	1	0.1001	0.0101	0	0	0	0	0	0	0	0	0	0	0	0	0	0	0	0	0	0	0	0	0	0	0	0	0	0	0	0	0	0.0167	0	0	0	0	0	0	0	0	0	0.0352
NSUN4	2792	AP	1			0	1	0.1001	0.0101	1	1	1	1	1	1	1	1	1	1	1	1	1	1	1	1	1	1	1	1	1	1	1	1	1	1	1	1	1	0.9833	1	1	1	1	1	1	1	1	1	0.9648
NSUN4	2793	ES	4	3	5	0	1	0.2566	0.0376	0.8827	0.923	0.9412	1	0.9395	0.9729	0.976	0.9826	0.9237	0.9751	0.9412	0.9811	0.863	0.9132	0.9652	0.9518	1	0.9596	0.9755	0.9203	1	0.9745	0.9437	0.9729	0.9727	0.9642	0.9026	0.9451	0.9399	0.9709	0.9837	0.9443	1	0.9722	0.983	0.9445	0.9378	0.9012	0.93	0.9846
NSUN4	2794	ES	2.2	1	3	0	0.9764	0.8218	0.1374	0.1813	0.1607	0.0543	0.1565	0.1426	0.0607	0.1124	0.1926	0.0616	0.107	0.2825	0.2808	0.1565	0.1744	0.0308	0.103	0.0439	0.1372	0.0842	0.1372	0.2114	0.132	0.0949	0.0688	0.1936	0.1354	0.1956	0.1048	0.1943	0.2372	0.1235	0.1745	0.3148	0.0318	0.0449	0.0772	0.1772	0.1926	0.3342	0
MKNK1	2798	AP	2.1			0	0.9909	0.6409	0.1122	0.5114	0.6549		0.7235	0.5788	0.5377	0.6379	0.6109	0.7047	0.5788	0.8627	0.6469	0.7694	0.4979	0.582	0.8627	0.5236	0.6533	0.4202	0.5826	0.3706	0.5179	0.5826	0.6469	0.5302	0.6665	0.6298	0.684	0.7766	0.6625	0.7153	0.6019	0.797	0.7198	0.6767	0.6782	0.6109	0.6659	0.5721	0.6261
MKNK1	2800	AP	1			0	0.9909	0.6409	0.1122	0.4886	0.3451		0.2765	0.4212	0.4623	0.3621	0.3891	0.2953	0.4212	0.1373	0.3531	0.2306	0.5021	0.418	0.1373	0.4764	0.3467	0.5798	0.4174	0.6294	0.4821	0.4174	0.3531	0.4698	0.3335	0.3702	0.316	0.2234	0.3375	0.2847	0.3981	0.203	0.2802	0.3233	0.3218	0.3891	0.3341	0.4279	0.3739
MKNK1	2802	AT	9.2			0	1	0.1263	0.023	0.0774	0.0569	0.061	0.0642	0.0681	0.0412	0.0522	0.0448	0.0581	0.0508	0.0819	0.0671	0.0328	0.0724	0.0386	0.0183	0.032	0.0338	0.0602	0.0978	0.0517	0.0591	0.0875	0.0639	0.0632	0.0774	0.038	0.0716	0.0573	0.0747	0.0793	0.0949	0.0248	0.0283	0.0348	0.0625	0.0393	0.0852	0.0499	0.0602
MKNK1	2804	AT	7.2			0	1	0.2304	0.0326	0.1283	0.0219	0.0514	0.018	0.0797	0.0564	0.0565	0.0767	0.0615	0.0618	0.0598	0.0769	0.1304	0.048	0.0644	0.0133	0.0389	0.0294	0.0541	0.0347	0.03	0.044	0.0406	0.0456	0.0532	0.0057	0.0396	0.0645	0.0793	0.0154	0.0914	0.0929	0.0566	0.0258	0.0539	0.0169	0.0477	0.0568	0.03	0.0568
MKNK1	2806	AT	17			0	1	0.2524	0.0384	0.7943	0.9212	0.8876	0.9178	0.8522	0.9024	0.8913	0.8785	0.8803	0.8874	0.8583	0.856	0.8368	0.8796	0.897	0.9684	0.9291	0.9369	0.8857	0.8675	0.9183	0.897	0.8718	0.8905	0.8836	0.9169	0.9224	0.8639	0.8633	0.9098	0.8293	0.8121	0.9186	0.9459	0.9113	0.9206	0.913	0.858	0.9201	0.883
MKNK1	2807	ES	16	15.2	17	0	1	0.5379	0.0923	0.7302	0.6539	0.7803	0.7145	0.5267	0.8185	0.7466	0.6655	0.7786	0.7797	0.7302	0.7183	0.6897	0.6699	0.5267	0.8748	0.8004	0.634	0.8185	0.6527	0.5479	0.7527	0.737	0.8221	0.6176	0.6906	0.7173	0.8661	0.7474	0.7242	0.7794	0.4583	0.8473	0.6205	0.7786	0.5294	0.6504	0.7199	0.747	0.7594
MKNK1	2808	AA	15.1	14	15.2	0	0.9982	0.2802	0.0368	0.0565	0.0447	0.046	0.0742	0.0334	0	0.0126	0.0818	0.047	0.1024		0.0204	0	0.088	0.0462	0.027	0.0399	0.028	0.1197	0.0602	0.0414	0.0671	0.0637	0.0637	0.0153	0.0117	0.0109	0.0681	0.0628	0.0777	0.0456	0.0388	0.0344	0	0.0222	0.0955	0	0.029	0.0361	0.0191
MKNK1	2809	ES	11	10	12	0	1	0.5838	0.0593	0.0819	0.117	0.0739	0.052	0.1072	0.0529	0.0796	0.1731	0.1182	0.1965	0.2997	0.076	0.1312	0.305	0.1002	0.0508	0.0607	0.0933	0.1303	0.1472	0.0556	0.1129	0.1445	0.0929	0.1138	0.0736	0.086	0.1155	0.155	0.1266	0.3177	0.176	0.1485	0.041	0.0889	0.2295	0.1448	0.1374	0.1021	0.1156
MKNK1	2810	ES	9.1	8	10	0	0.9982	0.2667	0.0288	1	0.991	0.9806	0.9745	0.9477	0.9544	0.9921	0.961	0.9914	0.9866	0.8241	0.9589	0.9568	0.8966	0.9936	1	0.986	0.9537	1	0.9051	0.9802	0.9655	0.979	0.9869	0.9725	0.9714	0.9847	0.9617	0.9225	0.9428	0.971	1	0.9573	0.949	1	1	0.9566	0.9875	0.9681	0.9739
MKNK1	2812	ES	7.1	5	8	0	1	0.1251	0.0197	1	0.9795	1	1	0.9662	1	0.9886	0.9857	0.9468	1	1	0.9695	0.9647	0.9525	0.9827	1	1	0.9898	0.9749	0.9734	1	0.9355	0.9726	0.9709	0.9915	1	0.9707	0.9709	1	1	0.9816	0.9542	1	0.965	0.9752	0.9667	0.9886	0.9764	0.9908	0.9814
MKNK1	2813	ES	6	5	7.1	0	1	0.087	0.0116	0	0.0151	0	0	0	0	0.0151	0.0217	0.0114	0.0068	0	0.0115	0	0	0.0036	0.0115	0.0069	0	0.0062	0.0288	0.0115	0	0.0102	0.013	0.0139	0.0152	0	0.0124	0	0	0.0118	0.0146	0.0128	0	0	0	0	0.0045	0.0135	0.0181
MKNK1	2814	ES	4	3	5	0	1	0.5103	0.0858	0.0289	0.0855	0.1465	0.2268	0.0239	0.1019	0.1053	0.1329	0.1213	0.0991	0	0.1027	0.1009	0.0827	0.1903	0.1317	0.2784	0.1141	0.2777	0.2524	0.2819	0.2586	0.1925	0.1616	0.1273	0.1023	0.112	0.2505	0.14	0.2985	0.1632	0.078	0.2314	0.0329	0.1488	0.2055	0.1329	0.0736	0.137	0.2444
MKNK1	2815	AD	2.2	2.1	3	0	0.9927	0.7393	0.1097	0.6732	0.6088	0.4448	0.7061	0.6578	0.6276	0.6759	0.607	0.6354	0.4835	0.5273	0.5458	0.4479	0.379	0.5244	0.6959	0.5646	0.519	0.6959	0.5786	0.6732	0.5425	0.6803	0.5595	0.6157	0.5074	0.5786	0.4911	0.5943	0.6223	0.7203	0.7668	0.6467	0.268	0.6223	0.4482	0.5273	0.3658	0.4715	0.6732
MOB3C	2816	AP	1			0	1	0.8484	0.1389	0.8819	0.7101	0.1516	0.7423	0.835	0.9458	0.9131	0.9153	0.8677	0.7276	0.708	0.6935	0.9839	0.5269	0.8695	0.795	0.7842	0.8445	0.6729	0.5718	0.685	0.7883	0.6736	0.8093	0.8093	0.8672	0.8988	0.6788	0.7609	0.5759	0.7572	0.7594	0.8418	0.9292	0.9106	0.3848	0.8086	0.73	0.8756	0.7379
MOB3C	2817	AP	2.1			0	1	0.8484	0.1389	0.1181	0.2899	0.8484	0.2577	0.165	0.0542	0.0869	0.0847	0.1323	0.2724	0.292	0.3065	0.0161	0.4731	0.1305	0.205	0.2158	0.1555	0.3271	0.4282	0.315	0.2117	0.3264	0.1907	0.1907	0.1328	0.1012	0.3212	0.2391	0.4241	0.2428	0.2406	0.1582	0.0708	0.0894	0.6152	0.1914	0.27	0.1244	0.2621
MOB3C	2818	RI	2.2	2.1	2.3	0	0.9945	0.3963	0.0438	1	1	1	1	1	1	1	1	1	0.934	1	1	1	1	1	1	1	0.9603	1	1	1	1	1	1	1	1	1	1	1	1	1	1	1	0.6037	1	1	1	1	0.8456	1
ATPAF1	2819	AP	1			0	1	0.1426	0.021	0.9045	0.9223	1	1	0.9743	1	1	1	1	0.9808	1	1	1	0.9706	1	1	1	0.9898	1	1	1	1	1	1	0.9829	1	1	0.9943	0.9857	0.9887	0.975	0.9903	1	1	1	1	1	1	1	1
ATPAF1	2820	AP	2			0	1	0.1426	0.021	0.0955	0.0777	0	0	0.0257	0	0	0	0	0.0192	0	0	0	0.0294	0	0	0	0.0102	0	0	0	0	0	0	0.0171	0	0	0.0057	0.0143	0.0113	0.025	0.0097	0	0	0	0	0	0	0	0
ATPAF1	2821	ES	09:10:00	8	11	0	1	0.1754	0.0274	0.9353	0.9295	0.947	0.9679	0.9043	0.9451	0.9465	0.9499	0.9277	0.9282	0.9256	0.9417	0.9578	0.9212	0.9399	0.9355	0.9655	0.9687	0.9653	0.9448	0.9337	0.9632	0.966	0.9765	0.9471	0.9892	0.9509	0.9492	0.9497	0.8968	0.918	0.9353	0.9565	0.9573	0.9467	0.9852	0.9375	1	0.9054	0.935
ATPAF1	2822	ES	4	3	5	0	0.9764	0.3296	0.0432	0	0	0.0121	0	0.0642	0	0	0.0096	0	0.0228	0	0.0314	0	0.1005	0	0.0305	0.0193	0.0275	0.0861	0	0.0118	0.016	0.0314	0.0815	0.0214	0.0529	0.0725	0.017	0.1206	0.0725	0.0609	0.0234	0	0.0155	0.0146	0.0518	0.0073	0.0205	0.0579	0.0096
EFCAB14	2823	AT	13			0	1	0.3227	0.0592	0.1671	0.1868	0.1865	0.1362	0.1461	0.2699	0.2257	0.2001	0.2085	0.2237	0.1652	0.1604	0.3513	0.2197	0.2282	0.2558	0.2341	0.2726	0.0819	0.1691	0.2433	0.2713	0.1393	0.2138	0.0887	0.1279	0.1873	0.2454	0.1528	0.2329	0.2439	0.2977	0.141	0.1907	0.1704	0.1206	0.2651	0.1485	0.1956	0.1669
EFCAB14	2824	AT	11			0	1	0.3227	0.0592	0.8329	0.8132	0.8135	0.8638	0.8539	0.7301	0.7743	0.7999	0.7915	0.7763	0.8348	0.8396	0.6487	0.7803	0.7718	0.7442	0.7659	0.7274	0.9181	0.8309	0.7567	0.7287	0.8607	0.7862	0.9113	0.8721	0.8127	0.7546	0.8472	0.7671	0.7561	0.7023	0.859	0.8093	0.8296	0.8794	0.7349	0.8515	0.8044	0.8331
EFCAB14	2825	ES	7	6	8	0	1	0.6691	0.1196	0.6024	0.7457	0.6596	0.6592	0.5347	0.6147	0.6575	0.6038	0.6636	0.5821	0.6922	0.8115	0.4668	0.5732	0.6076	0.5772	0.778	0.6723	0.5663	0.67	0.6799	0.6922	0.6662	0.8594	0.5874	0.6317	0.4395	0.759	0.7515	0.696	0.6183	0.7019	0.8884	0.5711	0.5764	0.7409	0.8289	0.3591	0.6703	0.5314
CYP4B1	2829	AP	1			0	0.7855	0.209	0.024	1	1	1	1	1		1	0.9662				1	1	1	1	1		1	0.949	1	1	1	1	1	0.9945		1	1	0.9911	1	1		0.9975	1	1		1	1	0.9915	0.9804
CYP4B1	2830	AP	3.1			0	0.7855	0.209	0.024	0	0	0	0	0		0	0.0338				0	0	0	0	0		0	0.051	0	0	0	0	0	0.0055		0	0	0.0089	0	0		0.0025	0	0		0	0	0.0085	0.0196
CYP4B1	2831	AT	9.2			0	0.9418	0.1856	0.0204	0	0	0	0	0.0154	0	0	0.006	0		0	0	0	0	0.0871	0	0	0	0.0054	0	0	0	0.0273	0	0.0023		0	0	0.0052	0	0.0354	0	0	0	0	0	0	0	0	0.0018
CYP4B1	2832	AT	13			0	0.9418	0.1856	0.0204	1	1	1	1	0.9846	1	1	0.994	1		1	1	1	1	0.9129	1	1	1	0.9946	1	1	1	0.9727	1	0.9977		1	1	0.9948	1	0.9646	1	1	1	1	1	1	1	1	0.9982
CYP4B1	2842	ES	00:02:03.200000	1	5	0	0.7782	0.0598	0.0035	1	1	1	1	1		1	1	1			1	1		1	1		1	1	1	1	1	1	1	1		1	1	1	1	1		1	1	1		1	1	1	1
CYP4X1	2888	AP	1			0	0.84	0.9222	0.1607	0.0596	0.0624	0.7154		0.046	0.1334	0	0	0	0		0.8302	0.0096	0	0.4769	0.683		0.1932	0	0	0		0.7154	0.3379	0		0	0	0.0973	0	0.0681	0	0	0	0		0	0.0973	0.0295	0
CYP4X1	2889	AP	2			0	0.84	0.9222	0.1607	0.9404	0.9376	0.2846		0.954	0.8666	1	1	1	1		0.1698	0.9904	1	0.5231	0.317		0.8068	1	1	1		0.2846	0.6621	1		1	1	0.9027	1	0.9319	1	1	1	1		1	0.9027	0.9705	1
PDZK1IP1	2893	AP	2.1			0	0.8982	0.0247	0.0016	0.9996	1		0.9898	1	1	0.9986	1	1		1	1	1	1	1		1	1	1	1	1	1	1	1		1	0.9986	1	1	1	0.9753	1	0.9997	1	1	0.9994	0.9996	1	1	1
PDZK1IP1	2894	AP	1			0	0.8982	0.0247	0.0016	0.0004	0		0.0102	0	0	0.0014	0	0		0	0	0	0	0		0	0	0	0	0	0	0	0		0	0.0014	0	0	0	0.0247	0	0.0003	0	0	0.0006	0.0004	0	0	0
STIL	2903	AA	16.2	15	16.3	0	0.8236	0.8156	0.1453	1	0.6546			0.6851	0.9432	0.7602	0.5919	1	0.4519	1	0.8573	0.885	0.6817	0.6985	0.842	0.7082	0.6945	0.6729	0.7474	0.5987	0.8727	0.7372	0.8582		0.9126	0.7656	0.7866	0.6976	0.5641	0.8373	0.7869		0.6839	0.6061	0.845	0.77	0.8086	0.5211	0.6617
CMPK1	2905	AT	7			0	1	0.0057	0.0007	0.9998	0.9997	1	1	0.9992	1	0.9994	0.9993	0.9992	0.9971	0.9993	0.9995	0.9996	0.9982	0.9996	1	1	0.9993	0.9993	0.9987	0.9995	0.9988	0.9997	1	1	0.9992	0.9997	0.9987	0.9993	0.9995	0.9943	1	0.9995	1	0.9998	0.9989	0.9989	0.9988	0.9995	0.9995
CMPK1	2906	AT	2			0	1	0.0057	0.0007	0.0002	0.0003	0	0	0.0008	0	0.0006	0.0007	0.0008	0.0029	0.0007	0.0005	0.0004	0.0018	0.0004	0	0	0.0007	0.0007	0.0013	0.0005	0.0012	0.0003	0	0	0.0008	0.0003	0.0013	0.0007	0.0005	0.0057	0	0.0005	0	0.0002	0.0011	0.0011	0.0012	0.0005	0.0005
CMPK1	2907	ES	5	4	6	0	1	0.0265	0.0053	0.9986	0.9891	0.9888	0.9779	0.9953	0.9893	0.9829	0.9956	0.9889	0.9735	0.9908	0.9907	0.9826	0.9927	0.996	0.9956	0.99	0.9983	0.9903	0.9981	0.9957	0.9933	1	0.9952	0.9955	0.9928	0.9932	0.9902	0.9857	0.9987	0.9926	1	1	0.9896	1	0.995	0.9961	0.9976	0.9969	0.993
CMPK1	2908	ES	3	1	4	0	1	0.0224	0.0033	1	0.9955	1	1	0.9853	0.9942	0.9984	0.998	0.9967	1	1	0.9973	0.9908	0.9964	0.9982	0.9936	1	0.9977	0.9941	1	0.9971	0.9962	0.9973	1	1	1	0.9966	1	1	0.9981	1	0.9941	1	0.9969	0.9935	1	0.9972	0.9965	1	0.9972
FAF1	2936	AP	9			0	0.8782	0.3866	0.0302		0.067			0	0	0	0	0	0			0	0.0814	0		0	0				0	0	0	0	0	0	0.0155	0	0	0.0349	0.0103		0	0		0	0.025	0	0.0181
FAF1	2937	AP	7.1			0	0.8782	0.4501	0.0432		0			0.1049	0	0.0275	0.0554	0	0			0	0.0423	0		0	0				0	0.046	0	0	0.025	0.0229	0.0161	0.0436	0	0.0363	0		0	0		0	0.026	0	0.0188
FAF1	2938	AP	1.1			0	0.8782	0.4501	0.0519		0.933			0.8951	1	0.9725	0.9446	1	1			1	0.8763	1		1	1				1	0.954	1	1	0.975	0.9771	0.9685	0.9564	1	0.9288	0.9897		1	1		1	0.9491	1	0.9631
FAF1	2939	ES	20	19	21	0	1	0.0326	0.0051	0.0035	0	0	0	0.0048	0	0	0.0026	0	0.0048	0	0	0	0.0021	0	0	0	0.0027	0.0032	0	0.0119	0	0.0033	0	0	0.0052	0.0016	0.0039	0.0015	0.0031	0.0201	0.0188	0	0.0012	0	0.0095	0	0.0023	0	0.0015
FAF1	2940	RI	1.2	1.1	1.3	0	0.9855	0.3784	0.0496	1	0.921		1	1	1	0.9571	0.9202	1	1	1	1	1	1	1	1	1	1	1	1	1	1	1	1	1	1	1	1	1	0.9202	1	0.9787	1	1	0.9126	0.8086	1	1	0.9108	1
CDKN2C	2941	AP	1			0	0.96	0.2411	0.0408	0	0	0	0	0	0	0	0	0	0	0	0	0	0	0	0	0	0	0	0.1661	0	0	0	0	0		0.0559	0	0.0469	0	0	0.1857	0	0	0		0	0.2049	0	0.0821
CDKN2C	2942	AP	3.1			0	0.96	0.2411	0.0408	1	1	1	1	1	1	1	1	1	1	1	1	1	1	1	1	1	1	1	0.8339	1	1	1	1	1		0.9441	1	0.9531	1	1	0.8143	1	1	1		1	0.7951	1	0.9179
TTC39A	2950	AT	15.5			0	1	0.6089	0.0928	0.0219	0.1211	0.0761	0.0883	0.0621	0.0383	0.0334	0.0884	0.0555	0.4005	0.0156	0.0495	0.0368	0.3001	0.0596	0.0861	0.0352	0.1018	0.0643	0.0613	0.0708	0.0627	0.1598	0.0555	0.0866	0.1236	0.0475	0.2173	0.0973	0.0843	0.5904	0.1723	0.021	0.0322	0.015	0.261	0.0847	0.0909	0.0998	0.0717
TTC39A	2951	AT	21			0	1	0.6483	0.0983	0.9597	0.8661	0.9132	0.9117	0.9167	0.9567	0.9578	0.9116	0.9367	0.5444	0.9844	0.9094	0.9632	0.6415	0.9271	0.9139	0.9598	0.8839	0.9199	0.9275	0.9253	0.9295	0.8126	0.9275	0.9003	0.8764	0.9507	0.7827	0.8646	0.9058	0.3419	0.7773	0.9741	0.9611	0.9811	0.7259	0.912	0.8782	0.896	0.9283
TTC39A	2952	AT	16.2			0	1	0.1534	0.0189	0.0184	0.0128	0.0107	0	0.0212	0.005	0.0088	0	0.0078	0.0551	0	0.041	0	0.0584	0.0132	0	0.005	0.0143	0.0158	0.0112	0.0039	0.0078	0.0276	0.0171	0.013	0	0.0019	0	0.0382	0.0099	0.0677	0.0503	0.0049	0.0068	0.0039	0.0131	0.0033	0.0308	0.0042	0
TTC39A	2953	AD	15.4	15.3	16.1	0	0.8218	1	0.0795	0.0917	0.0079	0.0008		0.0631	0.0012	0.0034	0.0194	0.0081		0.0734	0	0	0	0		0.0043		0	0.0578	0.0041	0.0018	0	0.0023	0.0724		0	0	0	0.0569		0.0096	0.0254	0	0.0013		0.0156	0.0543	0.0126	0
TTC39A	2954	RI	15.2	15.1	15.3	0	0.8782	0.3577	0.0358	0.0717	0.0229	0.0127		0.0261	0.0094	0.0089	0	0.0169		0	0.021	0	0.1338	0	0	0.0066		0.0163	0.0085	0.0091	0.0434	0.0149	0	0.0312	0.1386	0.0032	0.0648	0	0.0152	0.2245	0.018	0	0.0056	0		0	0.0312	0.0278	0.0134
TTC39A	2955	AA	10.1	9	10.2	0	0.8618	0.7848	0.106	0.149	0.5215	0.3527		0.2232	0.3982	0.3105	0.1893	0.391			0.2309	0.2374		0.2088		0.2673	0.2765	0.2374	0.1893	0.2189	0.5386	0.1629	0.243	0.4002		0.3384	0.1574	0.4119	0.1094	0.4829	0.3314	0.1719	0.2511	0.297		0.3183	0.4497	0.4174	0.2374
EPS15	2956	AP	1			0	0.9764	0.1831	0.0097	1	1	1	1	1	1	1	1	1	1	1	1	1	1	1	1	1	1	1	1	1	1	1	1	1	1	1	1	1	1	0.8169	1	1	1	1		1	0.9662	1	1
EPS15	2957	AP	13			0	0.9764	0.1831	0.0097	0	0	0	0	0	0	0	0	0	0	0	0	0	0	0	0	0	0	0	0	0	0	0	0	0	0	0	0	0	0	0.1831	0	0	0	0		0	0.0338	0	0
EPS15	2958	ES	16:17:00	15	18	0	1	0.0275	0.0024	1	1	1	1	1	1	1	0.9916	1	1	1	1	1	1	1	1	1	1	1	1	1	1	1	1	0.9941	0.9914	1	1	1	1	1	1	1	1	1	1	1	1	1	1
OSBPL9	2960	AP	9.1			0	0.9855	0.1716	0.0196	1	1		0.9688	0.9877	1	0.9821	1	0.9403	1	0.8284	1	1	1	1	1	1	1	1	0.9468	1	1	1	1	1	1	1	1	0.952	1	0.9421	1	1	1	1	1	1	1	1	1
OSBPL9	2962	AP	1			0	0.9855	0.1215	0.0119	0	0		0	0	0	0	0	0	0	0	0	0	0	0	0	0	0	0	0	0	0	0	0	0	0	0	0	0	0	0	0	0	0	0	0	0	0	0	0
OSBPL9	2964	AP	8			0	0.9855	0.1716	0.0156	0	0		0.0312	0.0123	0	0.0179	0	0.0597	0	0.1716	0	0	0	0	0	0	0	0	0.0532	0	0	0	0	0	0	0	0	0.048	0	0.0579	0	0	0	0	0	0	0	0	0
OSBPL9	2968	ME	16|17	15	18	0	1	0.1341	0.0203	0	0.0276	0.0097	0	0	0	0.0025	0.0135	0.0078	0.0139	0.0372	0.0056	0.0036	0.0164	0.0349	0.0204	0.031	0.0253	0.0168	0.0059	0.0281	0.0211	0.0396	0.1036	0	0.0099	0.0265	0.0226	0	0.0118	0.061	0.0217	0.0117	0.0239	0.0058	0.0235	0.0199	0.0218	0	0.0207
OSBPL9	2969	ES	17	15	18	0	1	0.7105	0.1423	0.9267	0.6406	0.7611	0.6745	0.6311	0.9414	0.7163	0.6865	0.755	0.58	0.7156	0.8243	0.6351	0.5684	0.6422	0.5722	0.566	0.6026	0.7401	0.7984	0.6342	0.6068	0.8	0.4882	0.6931	0.6915	0.7516	0.6008	0.6838	0.9253	0.6335	0.6648	0.6371	0.4987	0.8056	0.6444	0.7056	0.7468	0.9106	0.6745
OSBPL9	2970	ES	16	15	18	0	0.9618	0.3942	0.039		0.0481	0.0303	0	0	0	0.0062	0.0292	0.0238	0.0191	0.0887	0.0259	0.0063	0.0214	0.0609	0.0271	0.0401	0.0378	0.0464	0.0228	0.0478	0.0321	0.1417	0.0993	0	0.022	0.0761	0.0336	0	0.1289	0.101	0.0421	0.0204	0.0238	0.0238	0.0417	0.0464	0.0617	0	0.042
OSBPL9	2971	ES	14	13	15	0	0.9982	0.1205	0.0189	0	0	0.0158	0.0207	0.0328	0.0387	0.0056	0.0288	0.0133	0.0285	0	0.0077	0	0.0104	0.01	0.054	0.0477	0.0449	0.0158	0.0074	0.0517	0.0359	0.0273	0.0285	0.007	0.0106	0.0067	0.0205	0	0.0155	0.0467	0.0302	0.0789	0.0505	0.0125	0.0402	0.0263	0.0324	0.0234	0.0072
OSBPL9	2974	ES	11	9.2	12	0	0.9782	0.1065	0.0073	1	1	1	1	1	1	1	1	1	1	1	1	1	1	1	1	1	1	1	1	1	1	1	1	1	1	1	1	1	1	1	1	1	1	1	1	1	1	1	1
OSBPL9	2975	AD	9.2	9.1	11	0	0.9836	0.5979	0.0894	0.6531	0.8905	0.6663	0.7818	0.7377	0.893	0.8106	0.8832	0.8214	0.7056	0.7583	0.8878	0.8791	0.6654	0.7902	0.9113	0.7908	0.7786	0.6953	0.7823	0.8671	0.7163	0.8726	0.8591	0.5717	0.6726	0.7339	0.8407	0.9606	0.7683	0.9506	0.9323	0.7624	0.7955	0.7428	1	0.8501	0.8067	0.795	0.6479
OSBPL9	2976	ES	10	7	11	0	0.9455	0.172	0.0144	0	0	0	0	0	0	0	0	0	0	0	0.0175	0	0.063	0		0	0	0.0345	0.0411	0	0	0	0	0	0	0	0	0	0.0356	0.172	0	0.0597	0	0	0	0.0516	0	0	0
OSBPL9	2977	AD	6.2	6.1	7	0	0.9709	0.2801	0.0288	0	0	0.0511	0	0	0.0046	0.0064	0.0093	0	0		0	0	0.0407	0.016	0	0.0153	0	0	0	0.0188	0	0.0061	0.0086	0	0	0.0137	0.0279	0	0.0041	0.0973	0.0036	0	0	0.0121		0	0.0605	0.0171	0
OSBPL9	2979	ES	6.1	5	7	0	0.9964	0.4652	0.0821	0.9109	0.8828	0.7163	0.9661	0.8481	0.9417	0.8997	0.6351	0.9281	0.642	0.8364	1	0.8399	0.914	0.8105	1	0.8357	0.7839	0.8659	0.8115	0.8228	0.7951	0.8712	0.7923	0.877	0.8991	0.9175	0.9314	0.736	0.8907	0.9233	0.889	0.8516	0.8471	0.7978	0.8682	0.9014	0.9037	0.7558	0.8671
OSBPL9	2981	ES	5	4	6.1	0	0.9964	0.1447	0.0152	1	1	1	1	1	1	1	0.9507	1	1	1	1	1	1	1	1	1	1	1	1	0.938	1	1	1	1	1	0.9853	1	1	0.9792	0.8553	0.9882	1	0.969	1	1	1	1	1	1
NRD1	2982	AP	1.1			0	0.9927	0.1297	0.0189	1	0.9783		1	1	1	1	1	1	1	1	1	1	1	1	1	1	0.9809	1	1	1	1	0.9632	1	1	1	1	1	1	1	1	0.992	1	1	1	0.952	1	1	0.9784	1
NRD1	2983	AP	2			0	0.9927	0.1297	0.0189	0	0.0217		0	0	0	0	0	0	0	0	0	0	0	0	0	0	0.0191	0	0	0	0	0.0368	0	0	0	0	0	0	0	0	0.008	0	0	0	0.048	0	0	0.0216	0
NRD1	2986	ES	26	25	27	0	1	0.1358	0.0241	0.0246	0.0264	0.042	0.0067	0.0153	0.0173	0.0265	0.0239	0.0285	0.052	0	0.0179	0.0244	0.0477	0.028	0.0246	0.0107	0.0129	0.0369	0.0306	0.0168	0.0152	0.0483	0.0283	0.0175	0.0091	0.0156	0.0434	0.0411	0.0276	0.034	0.0433	0.0023	0.008	0.0102	0.1058	0.0126	0.0338	0.0287	0.0302
NRD1	2987	ES	04:05:00	3	6	0	1	0.4505	0.0623	0.0544	0.1118	0.1284	0.1083	0.1106	0.0737	0.0809	0.1131	0.1062	0.1589	0.1911	0.0822	0.1187	0.1314	0.0579	0.1294	0.0999	0.1163	0.0816	0.1263	0.1457	0.1144	0.1169	0.1779	0.1897	0.1716	0.1196	0.1743	0.1809	0.1313	0.052	0.0466	0.0963	0.0823	0.0399	0.236	0.1077	0.0667	0.0757	0.1361
NRD1	2988	AD	1.2	1.1	3	0	1	0.0805	0.01	1	1	0.9779	0.9901	0.9946	0.9949	0.9768	1	0.9904	0.9948	0.9195	0.9945	0.9858	1	0.9889	0.987	0.9958	0.9958	0.9904	1	0.9933	0.9803	1	0.9892	0.9871	0.9946	0.9923	0.9749	1	1	1	0.9928	1	0.9902	1	1	1	0.9813	0.9819	0.9937
TXNDC12	2989	AT	9			0	1	0.0498	0.0082	0.9971	0.9838	0.9996	0.9855	0.9847	0.9794	0.988	0.9834	0.9833	0.9752	0.9946	0.9816	0.9921	0.9664	0.9868	0.987	0.9743	0.9737	0.9904	0.9921	0.9882	0.9906	0.9843	0.9726	0.9783	0.9728	0.9858	0.9757	0.975	0.9745	0.9766	0.9808	0.9776	0.9843	0.9852	0.9883	0.9818	0.9719	0.9746	0.9805
TXNDC12	2990	AT	3			0	1	0.0498	0.0082	0.0029	0.0162	0.0004	0.0145	0.0153	0.0206	0.012	0.0166	0.0167	0.0248	0.0054	0.0184	0.0079	0.0336	0.0132	0.013	0.0257	0.0263	0.0096	0.0079	0.0118	0.0094	0.0157	0.0274	0.0217	0.0272	0.0142	0.0243	0.025	0.0255	0.0234	0.0192	0.0224	0.0157	0.0148	0.0117	0.0182	0.0281	0.0254	0.0195
TXNDC12	2991	ES	4	2	5	0	1	0.0447	0.0051	0	0.0111	0.0054	0.0153	0.004	0.0049	0.0024	0.0115	0.0086	0.0223	0	0.0043	0.0054	0.01	0.0081	0.0039	0.0079	0.0087	0.007	0.0076	0.0133	0.0135	0.0147	0	0.0034	0.006	0.0017	0.0085	0.0071	0.0115	0.0143	0.0019	0.0098	0	0.0028	0	0.0026	0.0105	0.0041	0.0082
BTF3L4	2992	AT	6.2			0	1	0.132	0.0212	0.014	0.0512	0.0136	0.0044	0.0277	0.0123	0.0126	0.0413	0.0171	0.0326	0	0.0281	0.0212	0.1211	0.0123	0	0.0359	0.0135	0.0737	0.0205	0.0241	0.0362	0.0359	0.0281	0.0233	0.0286	0.0285	0.0768	0.0592	0.0361	0.0625	0.0051	0.0128	0.0018	0.0106	0.0685	0.0234	0.0403	0.0331	0.0202
BTF3L4	2993	AT	7			0	1	0.132	0.0212	0.986	0.9488	0.9864	0.9956	0.9723	0.9877	0.9874	0.9587	0.9829	0.9674	1	0.9719	0.9788	0.8789	0.9877	1	0.9641	0.9865	0.9263	0.9795	0.9759	0.9638	0.9641	0.9719	0.9767	0.9714	0.9715	0.9232	0.9408	0.9639	0.9375	0.9949	0.9872	0.9982	0.9894	0.9315	0.9766	0.9597	0.9669	0.9798
BTF3L4	2994	ES	5	4	6.1	0	1	0.2464	0.0259	0.9006	0.9011	0.9344	0.9634	0.937	0.931	0.9143	0.9581	0.9545	0.9165	0.9621	0.9327	0.9572	0.9424	0.9157	0.9417	0.9338	0.9234	0.925	0.9245	0.8964	0.9336	0.9554	0.8976	0.9454	0.8941	0.9488	0.9193	0.9464	0.9166	0.9536	0.9262	0.9516	0.9208	0.9372	0.9417	0.912	0.8555	0.9429	0.9498
BTF3L4	2995	ES	3	2	4	0	1	0.0314	0.0049	0.0035	0.0019	0.008	0.0095	0.0087	0.0165	0.013	0.012	0.0019	0.0063	0.0047	0.0089	0.0029	0.0032	0.0112	0	0.012	0.0074	0.0085	0.0157	0.0045	0.0101	0.0034	0.0095	0.0047	0.0047	0.0061	0.0085	0.0086	0.0043	0.0053	0.0055	0.0064	0	0.003	0.0034	0.0013	0.0015	0.0022	0.0026
BTF3L4	2996	ES	02:03:00	1	4	0	0.8982	0.5557	0.0748	0.0291	0.0116	0.1137	0.0791	0.0796	0.0713	0.0637	0.1461	0.0165	0.0893	0.0349	0.2675	0.0388	0.0146	0.0621		0.1097	0.0513	0.0727	0.0613	0.03	0.0596	0.038	0.1716	0.0617	0.0472	0.053	0.0772	0.1954	0.0308	0.0449	0.0471	0.0775	0	0.0308	0.0149	0.0069	0.0165		0.0377
BTF3L4	2997	ES	2	1	4	0	1	0.2177	0.0337	0.8802	0.8912	0.9536	0.8999	0.9191	0.8684	0.8733	0.9366	0.9201	0.9526	0.9073	0.9763	0.9418	0.8082	0.8802	0.9635	0.9185	0.893	0.9217	0.8228	0.9015	0.8746	0.9296	0.9581	0.9395	0.9351	0.9164	0.9157	0.9651	0.8937	0.9186	0.9229	0.9455	0.9157	0.917	0.8468	0.8652	0.9375	0.9832	0.9535
ZFYVE9	3000	ES	6	5	7	0	1	0.2175	0.036	1	0.9489	0.9764	0.9848	1	1	0.9689	0.9622	0.9701	1	0.822	0.9525	0.8475	0.9479	0.9572	0.962	0.9613	0.9414	1	0.9692	0.9901	0.9448	1	0.889	1	0.9819	0.9896	0.9504	1	0.9437	1	0.8936	1	0.9337	1	0.9576	0.9647	0.9671	0.9775	0.9574
CC2D1B	3001	AT	24			0	1	0.343	0.0583	0.1096	0.1143	0.0737	0.0234	0.1279	0.0482	0.2074	0.1139	0.0858	0.1646	0.0909	0.0941	0.2853	0.1711	0.0393	0	0.0623	0.0314	0.2568	0.1592	0.0434	0	0.1529	0.1699	0.1675	0.059	0.0753	0.1373	0.2414	0.1819	0.0143	0.1735	0.0421	0.0693	0.0518	0.2008	0.1476	0.2224	0.11	0.0748
CC2D1B	3002	AT	25.3			0	1	0.343	0.0583	0.8904	0.8857	0.9263	0.9766	0.8721	0.9518	0.7926	0.8861	0.9142	0.8354	0.9091	0.9059	0.7147	0.8289	0.9607	1	0.9377	0.9686	0.7432	0.8408	0.9566	1	0.8471	0.8301	0.8325	0.941	0.9247	0.8627	0.7586	0.8181	0.9857	0.8265	0.9579	0.9307	0.9482	0.7992	0.8524	0.7776	0.89	0.9252
CC2D1B	3003	RI	25.2	25.1	25.3	0	1	0.4792	0.078	0.2052	0.1351	0.5105	0.1542	0.2872	0.1574	0.1516	0.1696	0.1264	0.2778	0.2502	0.077	0.3228	0.4413	0.1897	0.2327	0.1043	0.1065	0.2843	0.3596	0.2464	0.2182	0.3157	0.2052	0.0878	0.0923	0.1424	0.1723	0.2885	0.227	0.0663	0.2193	0.0875	0.1353	0.132	0.3248	0.1047	0.3122	0.1429	0.2144
CC2D1B	3004	AA	14.1	13	14.2	0	0.9964	0.9116	0.0791		0.3094		0.0669	0.1579	0.114	0.1857	0.1547	0.2245	0.059	0	0.1012	0.1974	0.1775	0.1085	0.271	0.1531	0.1048	0.9116	0.1034	0.2006	0.0433	0.2271	0.0528	0.1503	0.2089	0.1254	0.2139	0.2698	0.2555	0.1547	0.1548	0.1129	0.1034	0.1393	0.1377	0.1223	0.3373	0.2121	0.1223
ZCCHC11	3007	AT	30			0	1	0.2314	0.0126	1	1	1	1	1	1	1	1	1	1	0.7686	1	1	1	1	0.8813	1	1	1	1	1	1	1	1	1	1	1	1	1	1	1	1	1	1	1	1	1	1	1	1
ZCCHC11	3008	AT	3.2			0	1	0.2314	0.0126	0	0	0	0	0	0	0	0	0	0	0.2314	0	0	0	0	0.1187	0	0	0	0	0	0	0	0	0	0	0	0	0	0	0	0	0	0	0	0	0	0	0	0
ZCCHC11	3009	AA	26.1	25	26.2	0	0.8964	0.8379	0.1348		0.7439	0.9142	0.4466	0.6595	0.5253	0.7439	0.7077		0.6174		0.5923		0.7651	0.902		0.601	0.6694	0.8099	0.7306	0.4133	0.6595	0.5831	0.7609	0.4466	0.729	0.5214	0.8395	0.6078	0.5728	0.8714	0.5345	0.3675	0.5636	0.6595	0.7719	0.4626	1	0.6592	0.7439
ZCCHC11	3010	ES	5	4	6	0	0.9855	0.2263	0.0177	1	1	1	1	1	1	0.8737	1	1	1	1	1	1	1	1	1	1	1	1	1	0.9586	1	1	1	1	1	1	1	1	1	1	0.9851	1	1	1	1	1	1	1	1
ZYG11B	3011	AT	14.2			0	1	0.05	0.0041	0	0	0	0	0	0	0	0	0	0	0	0	0	0	0	0	0	0	0	0	0	0	0	0	0	0	0	0	0	0	0	0	0	0	0	0	0	0	0	0
ZYG11B	3012	AT	15			0	1	0.05	0.0041	1	1	1	1	1	1	1	1	1	1	1	1	1	1	1	1	1	1	1	1	1	1	1	1	1	1	1	1	1	1	1	1	1	1	1	1	1	1	1	1
ZYG11B	3015	ES	09:10:00	8	12	0	0.9745	0.1038	0.0079	1	1	1	1	1	1	1	1	1	1	1	1	1	1	1	1	1	1	1	0.8962	1	1	1	1	1	0.9533	1	1	1	1	1	1	1	1	1		1	1	1	1
ECHDC2	3019	AT	8.2			0	1	0.2044	0.037	0.2023	0.1933	0.1584	0.1322	0.1549	0.1095	0.1233	0.0809	0.0829	0.1596	0.0451	0.1359	0.0666	0.2122	0.1339	0.098	0.0874	0.1211	0.1606	0.1981	0.118	0.113	0.21	0.1428	0.147	0.1748	0.1288	0.1554	0.1514	0.1648	0.1556	0.0987	0.0339	0.0842	0.0443	0.1043	0.1747	0.1297	0.1517	0.1721
ECHDC2	3020	AT	5.2			0	1	0.1937	0.0388	0.0525	0.0843	0.0492	0.0937	0.0851	0.0445	0.0367	0.0494	0.0297	0.1154	0.0353	0.1013	0.0094	0.1083	0.0777	0.0146	0.1015	0.0712	0.0731	0.0886	0.0533	0.0681	0.0856	0.0912	0.0859	0.0576	0.0856	0.0866	0.0583	0.1069	0.0651	0.0882	0.0209	0.0235	0.0324	0.1098	0.0479	0.0967	0.054	0.0967
ECHDC2	3021	AT	9.2			0	1	0.3238	0.0573	0.2292	0.2892	0.1828	0.2303	0.2073	0.1748	0.2405	0.165	0.138	0.3075	0.1305	0.2065	0.0915	0.2751	0.1698	0.126	0.1903	0.1778	0.2817	0.307	0.2059	0.1252	0.2671	0.1732	0.2112	0.0788	0.1438	0.2858	0.2367	0.2829	0.0992	0.208	0.0471	0.0766	0.0742	0.2128	0.1556	0.1923	0.2392	0.2663
ECHDC2	3022	AT	14			0	1	0.6183	0.1147	0.516	0.4332	0.6096	0.5438	0.5528	0.6712	0.5995	0.7046	0.7494	0.4175	0.789	0.5563	0.8325	0.4044	0.6186	0.7614	0.6208	0.63	0.4847	0.4063	0.6229	0.6937	0.4373	0.5928	0.5558	0.6887	0.6418	0.4722	0.5535	0.4454	0.6801	0.605	0.898	0.8157	0.8491	0.5732	0.6217	0.5813	0.555	0.4649
ECHDC2	3023	ES	13	12	14	1	0.8945	0.3392	0.0532	0.8846	0.8619		0.8554	0.9369	0.8214		0.8491	0.8902	0.8587	0.8902	0.6936	0.8265	0.8831	0.906		0.9004		0.8249		0.8658	0.9058	0.9161	0.8772	0.8952		0.8528	0.9293	0.8754		0.9282	0.8191	0.8691	0.9455	0.8402	0.9012		0.9583	0.9263	0.9026
ECHDC2	3024	ES	9.1	8.1	10	0	0.9909	0.7335	0.1282	0.5987	0.3852		0.7715	0.3231	0.3597	0.4581	0.6553	0.6385	0.5088	0.3436	0.6002	0.4019	0.2986	0.3308	0.6788	0.7608	0.3442	0.6655	0.5356	0.3384	0.5616	0.4367	0.7567	0.6292	0.4769	0.5933	0.6285	0.3601	0.5524	0.3065	0.4271	0.6923	0.475	0.7601	0.3818	0.4204	0.2754	0.571	0.6689
ECHDC2	3025	AA	6.1	5.1	6.2	0	1	0.5115	0.0863	0.8606	0.881	0.6859	0.5165	0.7902	0.9488	0.8507	0.7281	0.4885	0.8528	0.5875	0.9011	0.9305	0.9102	0.7963	1	0.8274	0.7966	0.7487	0.8654	0.6937	0.6267	0.9139	0.6622	0.7173	0.8201	0.8428	0.7308	0.7991	0.845	0.5837	0.8189	0.7191	0.7936	0.7761	0.8846	0.7621	0.7995	0.7024	0.8986
ECHDC2	3026	ME	3|4	2.1	5.1	0	0.8	0.8454	0.1306		0.1102			0.313			0.1812		0.4364				0.3204			0.1622	0.6077	0.256	0.2365	0.4817	0.2052	0.2365		0.2175	0.3405	0.3068	0.4168	0.3172	0.3587		0.5102				0.3304	0.2791	0.3733	0.3027	0.3534
ECHDC2	3027	ES	4	2.1	5.1	0	0.9218	1	0.1966	0.3764	0.3928			0.33			0.1235	0.083	0.5916	0	0.1945		0.4807	0.1196		0.2247	0.1715	0.3177	0.4752	0.0963	0.1533	0.3306	0.1533	0.7019	0.5208	0.1806	0.3705	0.3257	0.566		0.442	0.1533	0.0938		0.4886	0.2928	0.2997	0.613	0.5065
[truncated: 44,443 more rows]
[truncated: 185 more columns]
