# Supplementary material for: Survival-associated alternative splicing signatures in non-small cell lung cancer
Source: Aging (Albany NY). 2020 Apr 13;12(7):5878–93. doi: 10.18632/aging.102983 (PMC7185095; doi:10.18632/aging.102983)
Supplement: Supplementary Table 2. PSI_LUSC_2 [file aging-12-102983-s008..xlsx]

## Sheet: Sheet1
symbol	as_id	splice_type	exons	from_exon	to_exon	novel_splice	pct_with_values	psi_range	std_psi	TCGA_56_8082	TCGA_56_8082_Norm	TCGA_56_8083	TCGA_56_8083_Norm	TCGA_56_8201	TCGA_56_8201_Norm	TCGA_56_8304	TCGA_56_8305	TCGA_56_8307	TCGA_56_8308	TCGA_56_8309	TCGA_56_8309_Norm	TCGA_56_8503	TCGA_56_8504	TCGA_56_8622	TCGA_56_8623	TCGA_56_8623_Norm	TCGA_56_8624	TCGA_56_8625	TCGA_56_8626	TCGA_56_8628	TCGA_56_8629	TCGA_56_A49D	TCGA_56_A4BW	TCGA_56_A4BX	TCGA_56_A4BY	TCGA_56_A4ZJ	TCGA_56_A4ZK	TCGA_56_A5DR	TCGA_56_A5DS	TCGA_56_A62T	TCGA_58_8386	TCGA_58_8386_Norm	TCGA_58_8387	TCGA_58_8388	TCGA_58_8390	TCGA_58_8391	TCGA_58_8392	TCGA_58_8393	TCGA_58_A46J
PLEKHN1	1	ES	11	10	12	0	0.84	0.5588	0.0822	0.8938	1	1		0.9453		0.9372	0.9703		1	1		0.9469	1	0.9684			1	1	0.9034	0.9022	1	0.9041	1	1	0.8514	1	1	0.8804	1	0.9359	1	1		1	0.7546	0.8101	1	0.9326	0.9232
HES4	4	AD	1.2:1.3	1.1	2	0	0.9964	0.4599	0.0641	0.9136	0.9152	0.9752	0.8975	0.9799	1	0.9609	1	1	0.9416	0.8789	1	0.9425	0.8387	0.9638	0.915	0.8145	0.9177	0.9282	0.9553	0.9578	0.9483	1	0.8513	0.9532	0.9422	0.9202	0.9407	0.9078	0.9443	1	0.9197	0.8984	0.9518	0.8988	0.857	0.9076	1	1	0.9283
HES4	5	ES	1.3	1.1	2	0	0.9945	0.4476	0.0654	0.8453	0.883	0.9834	0.9573	0.9728	1	0.9607	1	1	0.9305	0.8589	1	0.9572	0.8632	0.9544	0.9126	0.8363	0.8959	0.8027	0.9554	0.927	0.9393	1	0.8247	0.956	0.9028	0.9314	0.8728	0.9728	0.9318	1	0.9279	0.8753	0.9576	0.794	0.9038	0.889	1	1	0.8772
HES4	6	RI	1.2	1.1	1.3	0	0.9982	0.7683	0.1441	0.6795	0.6009	0.3939	0.2829	0.5909	0.4196	0.5213	0.7462	0.5975	0.5628	0.5488	0.4619	0.433	0.4628	0.5883	0.5202	0.4836	0.5725	0.7608	0.508	0.6432	0.5543	0.6424	0.5718	0.503	0.6386	0.4802	0.7162	0.2259	0.5748	0.631	0.4883	0.576	0.49	0.7121	0.4191	0.5699	0.6967	0.5268	0.6665
C1orf159	7	AP	1			0	0.8491	0.8815	0.1941	0.7891		0.6751	0.6552	0.5951	0.3012	0.5964	0.4236	0.6516	0.7077	0.3721		0.4286	0.4379	0.8722	0.4717	0.6064	0.7056	1	0.7455	0.4161	0.7675	0.368	0.7522	0.2727	0.3041	0.6775	0.3318	0.4155	0.3476	0.8258	0.8837		0.755	0.3023	0.43	0.5476	0.36	0.3056	0.5486
C1orf159	8	AP	3			0	0.8491	0.8075	0.146	0.0733		0.1998	0.3448	0.2088	0.4755	0.4035	0.2972	0.121	0.1016	0.4273		0.2537	0.3457	0.0444	0.0621	0.1368	0.0619	0	0.0535	0.5839	0.0808	0.5229	0	0.3229	0.3201	0.0486	0.4714	0.0772	0.1372	0.1185	0.1163		0.0851	0.4176	0.3879	0.1572	0.2842	0.2412	0.2887
C1orf159	9	AP	4.1			0	0.8491	0.695	0.1531	0.1376		0.1251	0	0.1961	0.2233	0	0.2791	0.2273	0.1908	0.2006		0.3177	0.2164	0.0834	0.4662	0.2569	0.2325	0	0.201	0	0.1517	0.1091	0.2478	0.4044	0.3758	0.2739	0.1968	0.5073	0.5153	0.0557	0		0.1599	0.2801	0.1821	0.2952	0.3558	0.4531	0.1627
C1orf159	10	AT	10.2			0	0.9982	0.2162	0.0368	0.05	0.11	0.0264	0.063	0.0176	0.1667	0.021	0.0978	0	0	0.0167	0	0.0523	0	0.0099	0.0197	0.0311	0	0.0274	0.018	0.0384	0.0229	0.0163	0.0693	0.0191	0.1547	0.0301	0	0.0276	0.0404	0	0.0726	0	0.0321	0.0135	0.096	0.047	0.0917	0.0306	0.0076
C1orf159	11	AT	12			0	0.9982	0.2162	0.0368	0.95	0.89	0.9736	0.937	0.9824	0.8333	0.979	0.9022	1	1	0.9833	1	0.9477	1	0.9901	0.9803	0.9689	1	0.9726	0.982	0.9616	0.9771	0.9837	0.9307	0.9809	0.8453	0.9699	1	0.9724	0.9596	1	0.9274	1	0.9679	0.9865	0.904	0.953	0.9083	0.9694	0.9924
C1orf159	12	RI	11.2	11.1	11.3	0	0.9764	0.9211	0.1487	0.8538	0.6911	0.7671	0.6597	0.8529	0.6788	0.8302	1	0.8493	0.5884	0.6266	0.836	0.4986	1	0.6869	0.7613	0.8201	0.7619	1	0.7671	1	0.6487	0.7551	0.8483	0.8682	0.8818	0.8564	0.8724	0.583	0.7907	0.7768	0.88	1	0.8366	0.7198	0.7671	0.7079	0.6744	0.8253	0.9491
C1orf159	13	AD	11.2:11.3	11.1	12	0	0.9909	0.9417	0.1704	0.4	0.4368	0.5949	0.7658	0.4929	0.8178	0.5455	0.4329	0.593	0.5887	0.5892	0.7482	0.2617	0.4428	0.6383	0.8255	0.698	0.6634	0.7341	0.5621	0.5973	0.4143	0.7319	0.5237	0.4566	0.7694	0.6431	0.5434	0.2987	0.6492	0.3166	0.5225	0.6883	0.7743	0.5517	0.2933	0.4152	0.3043	0.6363	0.5455
C1orf159	14	ES	11.3	11.1	12	0	0.9509	1	0.1691	0.1124	0.3012	0.3495	0.6859	0.1685	0.6929	0.2184	0	0.2447	0.4992	0.4922	0.4028	0.2821	0	0.4662	0.6431	0.3728	0.4139		0.3031	0	0.2722	0.4838	0.1868	0.1322	0.3514	0.2562	0.1639	0.2676	0.3634	0.1241	0.1498		0.4177	0.3575	0.1297	0.254	0.191	0.2903	0.0656
C1orf159	15	ES	9	8	10.1	0	0.9764	0.1395	0.0178	0.0224	0	0	0	0	0.0338	0	0	0	0	0	0	0.0136	0	0.0111	0	0	0.0208	0	0	0.0133	0	0	0	0	0	0	0.0188	0.0133	0	0	0	0	0	0	0	0.0158	0	0.0232	0.0298
C1orf159	16	RI	5.4	5.3	5.5	0	0.8582	0.7765	0.1772	1	0.7475	0.8971	0.8681	0.7116	0.5682	0.7669	1	0.8216	0.6219	1	1	1	1	0.8736	0.7475	1	0.8502	0.644	0.6868	0.7945	0.7669	0.9347	0.8267	0.6296	0.919	0.9285	0.6637	0.8736	1	0.5102	1	1	0.6895	1	0.6637	1	1	0.8681	0.8572
C1orf159	17	RI	5.2:5.3:5.4	5.1	5.5	0	0.8091	0.7932	0.1655	0.8812	1	0.7104	0.8304	1	1	0.4818	1	0.7958	1	0.8663	0.7848	0.5512	1	1	0.6281	0.6283	1	1	0.8493	1	1	0.846	0.5702	1	0.8988	0.9114	1	0.4941	1	0.7201	1	1	1	1	1	1		0.8421	1
C1orf159	20	AA	5.1:5.2:5.3:5.4	4.4	5.5	0	0.9745	0.6357	0.1043	0.2182	0.2049	0.2268	0.3828	0.1098	0.1096	0.1102	0.1242	0.099	0.1107	0.1894	0.4561	0.0595	0.1607	0.147	0.2854	0.3149	0.2461	0.2158	0.2094	0.3162	0.0669	0.4211	0.1299	0.1205	0.3116	0.3593	0.1132	0.1132	0.352	0.0803	0.1238	0.2744	0.0999	0.2367	0.0765	0.213	0.0259	0.2152	0.1925
C1orf159	21	AA	5.3:5.4	4.4	5.5	0	0.9364	0.2778	0.0499	0	0	0	0.1103	0	0.0778	0.0902	0	0	0	0	0.2769	0.0723	0	0.0777	0.1069	0	0.0937	0	0	0	0.0679	0	0.2038	0.1153	0.1461	0.1416	0	0	0.1098	0	0.1079		0.0908	0	0	0.0599	0.1063	0	0.0505
C1orf159	22	ES	5.1:5.2:5.3	4.4	5.5	0	0.9491	0.3693	0.0501	0	0.0715	0.03	0.1961	0.0315	0.1238	0.0808	0	0.026	0.0563	0		0.0343	0	0.045	0.105	0	0.1013	0.1416	0.1591	0.1189	0.0474	0.113	0.2168	0.0877	0.0476	0.0743	0.0616	0.0131	0	0.0861	0		0.0434	0	0.0559	0	0.0068	0.0438	0.0607
C1orf159	23	ES	5.3	4.4	5.5	0	0.9145	0.378	0.0367	0	0	0	0.0411	0	0.0991	0.0558	0	0	0	0		0.0329	0	0.0202	0.0317	0	0.0288	0	0	0	0.04	0	0.1111	0.0713	0.0173	0.0212	0	0	0	0	0		0.0397	0	0	0	0.02	0	0.0127
C1orf159	24	ES	5.1	4.4	5.5	0	0.9291	0.3849	0.0533	0.0707	0.0194	0.1104	0.1369	0	0	0.1087	0	0.0348	0.013	0.0284		0.0819	0	0.0367	0.2284	0.2756	0	0	0.0561	0	0	0.1043	0.1514	0	0.1638	0.0727	0	0.0803	0	0.0433	0.0083		0	0	0	0	0.1148	0.062	0
C1orf159	25	RI	4.3	4.2	4.4	0	0.8945	0.6344	0.0494	0.0411	0.0187	0.0447	0.0187	0.0685	0	0.0501	0.079	0.0312	0.0187	0.0833		0.0349	0	0.029	0.0496	0.079	0.0312	0	0.0993	0.0381	0.0332	0.2272	0.0294	0.1305	0.0577	0.1861	0.0541	0.1838	0.079	0.0582	0.0169	0.021	0.0154	0.0772	0.079	0.0708	0.0541	0.0933	0.065
TNFRSF18	33	AP	2.1			0	0.9673	0.8014	0.1485	0.1927	0.5279	0.323		0.2448	0.5476	0.2543	0.2377	0.614	0.2323	0.447	0.1314	0.3691	0.1421	0.1498	0.5548	0.455	0.4542	0.4514	0.3823	0.349	0.1099	0.4266	0.315	0.2197	0.6021	0.4003	0.3149	0.2871	0.398	0.3052	0.2401	0.2323	0.2333	0.4588	0.2309	0.2115	0.2799	0.5531	0.3163
TNFRSF18	34	AP	1			0	0.9673	0.8014	0.1485	0.8073	0.4721	0.677		0.7552	0.4524	0.7457	0.7623	0.386	0.7677	0.553	0.8686	0.6309	0.8579	0.8502	0.4452	0.545	0.5458	0.5486	0.6177	0.651	0.8901	0.5734	0.685	0.7804	0.3979	0.5997	0.6851	0.7129	0.602	0.6948	0.7599	0.7677	0.7667	0.5412	0.7691	0.7885	0.7201	0.4469	0.6837
TNFRSF18	35	AD	4.2	4.1	5.1	0	0.9545	0.2905	0.044	0.9463	0.9388	0.8181		0.9046		0.9291	0.9304	0.9714	0.9609	0.9703	0.8015	0.8884	0.9622	0.9336	0.9676	0.9187	1	0.9758	0.796	0.9004	0.9192	0.9427	0.945	0.9243	0.9281	0.9638	0.9135	0.9492	0.9714	1	0.9505	0.959	0.931	0.9467	0.8881	0.9831	0.9233	1	0.8978
TNFRSF18	36	ES	4.1:4.2:5.1	3	5.2	0	0.9964	0.1851	0.016	0.9968	1	0.9903	1	1	1	0.9974	0.9905	1	0.9935	0.9912	1	1	1	0.9932	1	1	1	1	0.9757	1	0.9899	0.986	0.9945	0.9943	1	1	0.9904	0.9672	0.9875	1	0.9944	1	1	1	1	0.9945	0.9857	1	0.9909
TNFRSF18	37	ES	4.1:5.1	3	5.2	0	0.7564	0.5191	0.0976	0.9566		0.9713	1	1		0.9747	0.9169	1	0.8993	0.8236	1	1	1	0.9397		1			0.9296	1	0.9251	0.8587	0.9257	0.9513			0.9248	0.6527	0.7432		0.9173		1	1	1	0.802	0.8841		0.9434
SDF4	38	AT	8.2			0	1	0.0557	0.0074	0.9981	0.9953	0.9443	1	0.9936	0.9933	1	1	0.9787	0.9956	0.9931	1	0.9966	1	0.9947	0.9916	0.9916	0.9899	0.9921	0.9887	0.9811	1	0.9941	0.9889	1	0.991	0.995	0.9827	0.9963	0.9897	0.9957	1	0.9885	0.9961	0.9476	0.9882	1	1	0.9893	0.9912
SDF4	39	AT	5			0	1	0.0557	0.0074	0.0019	0.0047	0.0557	0	0.0064	0.0067	0	0	0.0213	0.0044	0.0069	0	0.0034	0	0.0053	0.0084	0.0084	0.0101	0.0079	0.0113	0.0189	0	0.0059	0.0111	0	0.009	0.005	0.0173	0.0037	0.0103	0.0043	0	0.0115	0.0039	0.0524	0.0118	0	0	0.0107	0.0088
SDF4	40	AA	8.1	7	8.2	0	1	0.1274	0.0188	0.0538	0.0643	0.0835	0.0504	0.0605	0.0568	0.0596	0.0485	0.0764	0.0319	0.0524	0.0632	0.056	0.0621	0.0497	0.0598	0.0486	0.039	0.0466	0.0691	0.0388	0.0507	0.0794	0.0494	0.0623	0.0601	0.0582	0.0441	0.0391	0.0642	0.0359	0.049	0.0539	0.0612	0.0454	0.0404	0.0295	0.0621	0.0346	0.0529
SDF4	41	AA	6.1	4	6.2	0	1	0.1316	0.0126	0.001	0.0138	0.0569	0.0115	0.0196	0.0073	0.0194	0.0173	0.0349	0.0117	0.014	0.0098	0.0102	0.0026	0.0063	0.0127	0.016	0.0129	0.0158	0.0226	0.0327	0.0057	0.0398	0.0157	0.0147	0.0357	0.0192	0.032	0.0204	0.0354	0.0075	0.0095	0.0278	0.0219	0.0306	0.0173	0.019	0.0186	0.0154	0.0448
UBE2J2	47	ES	6.1:6.2	5	7	0	1	0.1666	0.0265	0.0419	0.003	0.0764	0.0341	0.0311	0.0078	0.0048	0.0249	0.0429	0.0209	0.04	0.0282	0.009	0.0387	0.0339	0.0188	0.0302	0.0439	0.0183	0.0532	0.0124	0.0649	0.0599	0.0351	0.0755	0.058	0.0475	0.0588	0.0134	0.0739	0.078	0.0679	0.0251	0	0.1305	0.0605	0.0181	0.0764	0.0662	0.0696
UBE2J2	48	ES	6.1	5	7	0	1	0.2747	0.0509	0.0834	0.0659	0.15	0.0145	0.048	0.0337	0.0502	0.088	0.0363	0.0255	0.0259	0.0337	0.0548	0.0228	0.0789	0	0.0258	0.0231	0.07	0.1107	0.0527	0.0809	0.0973	0.0666	0.1023	0.0679	0.0151	0.0337	0.2747	0.1156	0.1904	0.0596	0.0215	0.0504	0.0697	0.1453	0.0229	0.1114	0.0512	0.1367
UBE2J2	52	ES	4	2.1	5	0	1	0.1273	0.018	0.0207	0.0572	0.0267	0.0474	0.0289	0.0266	0.0466	0.0313	0.0347	0.0442	0.0556	0.0763	0.0778	0.025	0.0308	0.0459	0.1021	0.0281	0.0503	0.0641	0.058	0.0291	0.0396	0.0707	0.0528	0.0251	0.0802	0.063	0.0173	0.0569	0.0367	0.0624	0.0506	0.0406	0.0774	0.0359	0.0455	0.0799	0.0361	0.0331
UBE2J2	53	ES	2.2:3	2.1	5	0	1	0.0534	0.0086	0.0035	0.01	0.0105	0.0079	0.0113	0.0126	0.0268	0.0071	0.0144	0.0113	0.0062	0.0209	0	0	0	0.0026	0.0171	0.0038	0	0	0.0151	0.0041	0.0185	0.0145	0	0	0	0	0	0.0044	0.0047	0.0356	0.0023	0.0074	0	0.0056	0.0085	0.0026	0.007	0.0098
UBE2J2	54	ES	3	2.1	5	0	1	0.0849	0.0136	0.0051	0.0145	0.0162	0.0123	0.018	0.0206	0	0.0103	0.0042	0.0188	0.0098	0.012	0.0308	0.033	0.0214	0.0046	0	0.0056	0.0462	0.0674	0.0219	0.0064	0	0	0.0339	0.036	0.024	0.0539	0.0369	0.0068	0.0069	0.0104	0.004	0.0124	0.0363	0.0081	0.0136	0.0038	0.0102	0.0151
UBE2J2	55	AD	2.2	2.1	5	0	1	0.2044	0.0266	0.0382	0.0327	0.0733	0.0541	0.0602	0.0278	0.0657	0.075	0.0334	0.039	0.0356	0.0293	0.1052	0.046	0.0414	0.0369	0.0108	0.0282	0.0321	0.0375	0.0758	0.0746	0.0812	0.0118	0.0653	0.0485	0.0949	0.05	0.0621	0.0643	0.0233	0.033	0.0368	0.0928	0.06	0.0728	0.0858	0.056	0.0261	0.0352
UBE2J2	57	ES	2.1:4	1.1	5	0	0.7855	1	0.1993	0.0491	0.7982	0.1706	0.7201	0.5624		0.6174	0.4515	0.4333		0.6723	0.7231	0.4784		0.1951	0.499	0.6808	0.1405	0.3976	0.5107	0.2944	0.4212	0.6726	1	0.5545	0.3867	0.2538			0.6678	0.4484	0.763	0.5926	0.4199	0.888	0.3637	0.2027		0.5825	0.6578
UBE2J2	63	ES	2.1:2.2	1.1	5	0	0.9327	0.9767	0.1903	0.2439	0.7993	0.4666	0.8359	0.7368	0.6651	0.79	0.7163	0.5894	0.3007	0.6115		0.601	0.7912	0.2483	0.5472		0.1531	0.3078		0.4591	0.7321	0.8484		0.6934	0.5656	0.3819	0.4979	0.6179	0.7623	0.466	0.6083	0.554	0.6954	0.8647	0.5617	0.6134	1		0.7771
UBE2J2	65	ES	2.1	1.1	5	0	1	0.1442	0.0232	0.903	0.99	0.926	0.9889	0.9814	0.9859	0.984	0.9765	0.9744	0.9342	0.9792	0.9822	0.9512	0.9903	0.9234	0.9668	0.9693	0.9577	0.9446	0.9841	0.9199	0.9783	0.9864	1	0.9737	0.9759	0.8574	0.9661	0.9659	0.9831	0.9759	0.9833	0.9798	0.9695	0.9916	0.9576	0.9529	1	0.9843	0.9906
UBE2J2	66	AD	1.2	1.1	2.1	0	0.9927	0.1784	0.0255	0.0225	0.0318	0.0151	0.0095	0.0291	0.0178	0.0216	0.0323	0.0067	0.0054	0	0	0.0271	0.0095	0.0334	0.0428	0.0218	0.0083	0.0211	0.0038	0.0362	0.039	0.0256		0.0107	0.0078	0.0064	0	0.0369	0.0492	0.0205	0.0454	0.0041	0.0459	0.0345	0.0668	0.0507	0.0334	0.0357	0.0235
ACAP3	74	ES	21	20	22	0	0.9982	0.6157	0.0431	0.9029	0.8759	0.9908	0.9738	0.9572	0.9584	0.9457	0.9864	1	0.9822	0.9703	0.9607	0.981	0.9735	1	0.9731	0.9342	0.9874	0.9248	0.9721	0.9828	0.983	0.9714	1	0.9464	0.9707	0.9736	0.9767	0.9717	0.9675	1	0.9217	0.9584	0.9877	0.9503	0.9408	0.9231	0.9358	0.9781	0.9113
ACAP3	75	ES	2	1	3	0	0.8418	0.2458	0.045	0	0	0.1533	0.0369	0	0.0675	0	0	0.0445	0.0559	0	0	0	0	0	0.0369	0	0.1207	0.07	0.0445	0.0612	0.0852	0.027	0.1964	0	0	0.0642	0.0264	0	0	0.0349	0	0	0	0.0675	0	0.0416	0.0445	0	0.1481
CPSF3L	80	AA	11.1	10	11.2	0	1	0.4165	0.0794	0.1774	0.1267	0.1519	0.1017	0.0902	0.1242	0.157	0.1108	0.1458	0.1701	0.1638	0.1953	0.211	0.1546	0.1724	0.169	0.1712	0.1953	0.1964	0.2001	0.1837	0.1884	0.2284	0.2229	0.1573	0.2842	0.2059	0.2229	0.1943	0.1974	0.1082	0.2117	0.0997	0.3558	0.3929	0.2335	0.2237	0.1751	0.2419	0.2524
CPSF3L	81	ES	00:10:11.100000	9	11.2	0	0.9855	0.4026	0.075	0.96	1	0.9612	0.9059	0.8988	1	0.9424	0.7416	0.9619	1	1	1	1	0.9314	0.9787	1	0.9453	0.9605	1	0.954	0.9543	0.8721	0.9656	1	0.94	0.9566	0.9676	0.9556	0.9133	0.8687	0.8943	1	1	0.9654	0.9259	0.9386	1	1	0.9514	0.9666
CPSF3L	82	ES	10	9	11.2	0	1	0.096	0.0097	0.9955	1	0.996	0.994	0.9933	1	0.9939	0.9789	0.9963	1	1	1	1	0.9923	0.9971	1	0.9927	0.9953	1	0.9944	0.9941	0.979	0.9944	1	0.9938	0.9904	0.9951	0.9922	0.9878	0.9789	0.9926	1	1	0.9901	0.9743	0.9904	1	1	0.9922	0.9929
CPSF3L	83	AA	7.1	6.2	7.2	0	1	0.0653	0.0116	0.9706	1	0.9737	0.9739	0.9941	0.9838	0.9783	0.9845	0.9899	1	0.9748	0.9678	0.9922	0.9852	0.9736	0.9869	0.9733	0.9861	0.9712	0.9722	0.9824	0.9734	0.9936	0.9374	0.9678	0.99	0.9802	0.9669	0.9889	0.9712	0.9831	0.9779	0.95	0.9897	0.9818	0.9885	0.9823	0.9726	0.9861	0.966
CPSF3L	84	AA	6.1	5.2	6.2	0	1	0.0984	0.0146	0.9724	0.9862	0.9822	0.9806	0.9739	0.9812	0.9724	0.982	0.9879	0.9839	0.979	0.967	0.9799	0.9876	0.9897	0.9629	0.9674	0.9841	0.9634	0.9952	0.9602	0.9574	0.9866	0.9266	0.9603	0.9875	0.9747	0.97	0.9678	0.9716	0.9905	0.984	0.9619	0.9636	0.9822	0.9863	0.9932	0.9462	0.9863	0.9638
CPSF3L	85	ES	5.1:5.2:6.1:6.2:7.1:7.2:8	4	9	0	0.9909	0.2218	0.0159	1	1	1	1	1	1	0.9321	1	1	1	1	1	1	1	1	1	1	1	1	1	1	1	1	1	1	1	1	1	1	1	1	1	1	1	1	1	1	1	1	1
CPSF3L	86	ES	5.2:6.1:6.2:7.1:7.2:8	4	9	0	1	0.0069	0.0008	1	1	1	1	1	1	0.9957	1	1	1	1	1	1	1	1	1	1	1	1	1	1	1	1	1	1	1	1	1	1	1	1	1	1	1	1	1	1	1	1	1
CPSF3L	88	ES	5.2:6.2:7.1:7.2:8	4	9	0	0.9145	0.3189	0.0268	1	1	1	1	1	1	0.9017	1	1	1	1	1	1	1	1	1	1	1	1		1	1	1	1	1	1	1	1	1	1	1	1	1	1	1	1		1	1	1
CPSF3L	91	ES	5.2:6.1:6.2:7.2:8	4	9	0	0.9582	0.2971	0.0222	1		1	1	1	1	0.8961	1	1		1	1	1	1	1	1	1	1	1	1	1	1	1	1	1	1	1	1	1	1	1	1	1	1	1	1	1	1	1	1
CPSF3L	94	ES	5.1:5.2:6.1:6.2	4	7.1	0	0.9873	0.2823	0.023	1	1	1	1	1	1	1	1	1	1	1	1	1	1	1	1	1	1	1	1	1	1	1	1	1	1	1	1	1	1	0.9646	1	1	0.9639	1	1	0.9229	1	1	1
CPSF3L	95	ES	5.2:6.1:6.2	4	7.1	0	1	0.0142	0.0017	1	1	1	1	1	1	1	1	1	1	1	1	1	1	1	1	1	1	1	1	1	1	1	1	1	1	1	1	1	1	0.9975	1	1	0.9928	1	1	0.9928	1	1	1
CPSF3L	97	ES	5.2:6.2	4	7.1	0	0.8818	0.3445	0.0444	1	1	1	1	1	1	1	1	1		1	1	1	1	1	1	1	1	1		1	1	1	1	1	1	1	1	1	1	0.8283	1	1	0.8792	1	1		1	1	1
CPSF3L	98	AA	5.1	4	5.2	0	1	0.3951	0.0699	0.0808	0.042	0.1271	0.0429	0.077	0.0705	0.0708	0.1732	0.1233	0.0931	0.0837	0.0456	0.124	0.0631	0.1085	0.0786	0.06	0.1544	0.1491	0.1622	0.2229	0.1231	0.139	0.1717	0.1301	0.2691	0.124	0.289	0.0676	0.1323	0.0778	0.0925	0.0774	0.2117	0.1631	0.069	0.093	0.0909	0.1029	0.2032
CPSF3L	120	ES	4:5.1:5.2:6.1:6.2	1	7.1	0	0.8964	0.916	0.1565	1	1	1	1	0.5348	1	1	1	1	1	1		0.7433	1	1	0.9243	0.8574	1	0.7989	1	1	1	1	1	1	1	1	0.8418	1	1	0.887	0.8106	1	1	1	1	1	1	1	0.9047
CPSF3L	124	ES	4:5.2:6.1:6.2	1	7.1	0	1	0.0441	0.0045	1	1	1	1	0.9909	1	1	1	1	1	1	1	0.9926	1	1	0.9965	0.9946	1	0.9945	1	1	1	1	1	1	1	1	0.9924	1	1	0.9943	0.9966	1	1	1	1	1	1	1	0.9965
CPSF3L	132	ES	4:5.2:6.2	1	7.1	0	0.9145	0.7155	0.1075	1	1	1	1	0.7994	1	1	1	1	1	1	1	0.8071	1	1	0.9329	0.8779	1	0.9017		1	1	1	1	1	1	1	0.8338	1	1	0.6868	0.8732	1	1	1	1		1	1	0.9373
CPSF3L	138	ES	2.1:2.2:3	1	4	0	0.9982	0.3096	0.0304	0.0108	0.0035	0.045	0.0199	0.0079	0.0104	0.0053	0.0273	0.012	0.0786	0.0133	0.0161	0.0091	0.0206	0.0264	0.0117	0.0281	0.0159	0.017	0.0294	0.0302	0.0138	0.0174	0.0391	0.0182	0.0155	0.0134	0.0708	0.0047	0.0094	0.1006	0.0212	0.0084	0.0499	0.0192	0.0198	0.0091	0.0351	0.0275	0.0148
CPSF3L	139	ES	2.1:3	1	4	0	0.9982	0.1747	0.0163	0	0.0072	0.0519	0	0	0	0	0	0	0	0	0	0	0	0.0194	0	0	0	0.0274	0.0229	0	0	0	0	0.0615	0.0191	0	0	0.0178	0.0259	0.0118	0	0	0	0	0	0	0.0262	0.0151	0
CPSF3L	140	ES	2.1	1	4	0	0.9982	0.2189	0.0333	0.0146	0.022	0.157	0.0783	0	0.069	0.0441	0.0219	0	0	0	0.0279	0.0738	0.0388	0.0278	0.0289	0.0373	0.0508	0	0.0316	0.023	0.0388	0.0292	0	0	0	0.0287	0	0.0323	0.0895	0.0789	0	0.0137	0.1299	0	0	0.0432	0.0205	0.0191	0
DVL1	141	AD	11.2	11.1	12	0	0.9982	0.7311	0.1443	0.4432	0.2771	0.3332	0.1648	0.3008	0.3384	0.5582	0.431	0.4332	0.5123	0.4004	0.3364	0.4426	0.6375	0.6801	0.3354	0.3222	0.6272	0.7347	0.4149	0.4511	0.7011	0.5695	0.4124	0.5485	0.6563	0.5136	0.61	0.4516	0.6398	0.3972	0.5456	0.503	0.5879	0.6254	0.571	0.8195	0.5964	0.5798	0.681
MXRA8	142	AP	1			0	0.9873	1	0.1218	0.0055	0.0261	0.0518	0.0263	0.0015	0.0401	0.1065	0.0647	0.3128	0.045	0.0053	0.004	0.0054	0	0	0.0138	0.0118	0.0209	0.0074	0.0351	0.0597	0.0499	0.4536	0.0325	0.275	0.4857	0.0198	0.1739	0.0689	0.0828	0.007	0.0478	0.02	0	0.0796	0.0092	0.107	0.0572	0.0404	0.1783
MXRA8	143	AP	2			0	0.9873	1	0.1218	0.9945	0.9739	0.9482	0.9737	0.9985	0.9599	0.8935	0.9353	0.6872	0.955	0.9947	0.996	0.9946	1	1	0.9862	0.9882	0.9791	0.9926	0.9649	0.9402	0.9501	0.5464	0.9675	0.725	0.5143	0.9802	0.8261	0.9311	0.9172	0.993	0.9522	0.98	1	0.9204	0.9908	0.893	0.9428	0.9596	0.8217
MXRA8	144	AA	11.1	10.2	11.2	0	1	0.139	0.0146	0.9737	0.98	0.9797	0.9826	0.9963	0.9899	1	0.9817	1	0.9929	0.9864	0.9865	0.9825	1	0.9846	0.9934	0.9819	0.9848	0.9946	0.9938	0.9747	0.9916	0.9861	0.9878	0.9812	0.9617	0.9802	1	1	1	0.9904	0.9799	0.9626	0.9875	0.9961	0.9862	1	0.988	0.988	0.979
MXRA8	145	AA	10.1	9	10.2	0	0.9964	0.23	0.0287	0	0.026	0.01	0.0159	0.0087	0.0171	0.0253	0.0108	0.0647	0.0238	0.0118	0.013	0.0043	0.0372	0.0158	0.0168	0.0152	0.0064	0.006	0.0193	0.0305	0.0208	0.0331	0	0.0214	0.0358	0.006	0.0264	0.018	0.0147	0.0225	0.0105	0.0221	0	0.0177	0.0092	0	0	0.0271	0.0647
MXRA8	146	ES	4	3	5	0	0.9927	0.3305	0.04	1	1	1	0.9758	1	1	1	0.9374	1	0.9721	0.9747	1	1	0.9646	0.9917	0.9897	1	0.9759	0.9927	0.9598	1	0.979	0.9213	1	1	1	0.9926	1	1	1	0.9846	1	1	1	0.9777	1	1	1	0.9646	1
AURKAIP1	147	RI	1.4	1.3	1.5	0	0.9909	0.7896	0.1329	0.3705	0.4127	0.525	0.5044	0.2792	0.2567	0.3833	0.2239	0.2984	0.3473	0.2538	0.2369	0.3063	0.156	0.2264	0.2871	0.3927	0.4344	0.297	0.2702	0.2002	0.3471	0.6335	0.2853	0.57	0.7278	0.3275	0.2609	0.3939	0.4192	0.4407	0.3481	0.177	0.6689	0.4637	0.5094	0.3372	0.3866	0.2528	0.3849
AURKAIP1	148	RI	1.3:1.4	1.2	1.5	0	0.9782	0.754	0.1379	0.8373	0.7981	0.7881	0.7198	0.6449	0.6395	0.789	0.6972	0.6917	0.7384	0.6743	0.7154	0.7564	0.4908	0.639	0.7011	0.8321	0.7875	0.5666	0.8683	0.4521	0.6682	0.9221	0.791	0.8976	0.9187	0.6841	0.616	0.9076	0.6721	0.921	0.78	0.4936	0.6892	1	0.9398	0.7969	0.9086	0.779	0.8
AURKAIP1	149	AD	1.3	1.2	1.5	0	0.9945	0.3894	0.0522	0.9317	0.8962	0.8444	0.7795	0.8771	0.8591	0.9074	0.91	0.8916	0.9022	0.8978	0.9037	0.9185	0.891	0.911	0.865	0.9244	0.8898	0.8354	0.9611	0.8341	0.8543	0.8972	0.9369	0.897	0.844	0.8681	0.8879	0.9527	0.7955	0.9551	0.8814	0.8852	0.6106	1	0.961	0.9125	0.9527	0.9326	0.9093
AURKAIP1	150	RI	1.2:1.3:1.4	1.1	1.5	0	0.9982	0.2862	0.0403	0.0515	0.0833	0.0871	0.1076	0.0639	0.0543	0.0425	0.0628	0.0581	0.0693	0.0434	0.0564	0.0542	0.0187	0.0356	0.0607	0.0689	0.0983	0.0399	0.0763	0.0394	0.0832	0.2215	0.039	0.0806	0.2242	0.074	0.0523	0.0857	0.05	0.1226	0.0527	0.032	0.1071	0.0667	0.098	0.1318	0.0691	0.078	0.0705
AURKAIP1	151	AD	1.2:1.3	1.1	1.5	0	0.9982	0.5411	0.0522	0.1112	0.141	0.1027	0.1199	0.1852	0.1394	0.0889	0.1948	0.1567	0.1682	0.1383	0.155	0.1508	0.1174	0.1581	0.1286	0.1407	0.1701	0.1199	0.2038	0.1789	0.1853	0.1476	0.1155	0.0668	0.1033	0.1736	0.1984	0.1374	0.0777	0.1886	0.0883	0.1835	0.0676	0.0814	0.1278	0.2557	0.1154	0.2161	0.1359
AURKAIP1	152	AD	1.2	1.1	1.5	0	0.9982	0.0832	0.0091	0.0082	0.0149	0.0161	0.0291	0.027	0.0202	0.0083	0.0183	0.0173	0.0177	0.0147	0.015	0.0131	0.0125	0.0165	0.0191	0.0122	0.0223	0.0242	0.0082	0.0375	0.0329	0.0157	0.0068	0.0063	0.0172	0.0285	0.0286	0.0064	0.0185	0.0106	0.011	0.0249	0.0394	0	0.0052	0.0287	0.0067	0.016	0.0125
CCNL2	155	AT	12			0	1	0.678	0.0775	0.6195	0.7256	0.6665	0.7175	0.7092	0.7294	0.746	0.6656	0.6783	0.7117	0.661	0.7286	0.725	0.6629	0.6763	0.7145	0.6917	0.6165	0.6582	0.6776	0.6764	0.6653	0.8	0.672	0.687	0.6493	0.7103	0.6818	0.7382	0.6988	0.6039	0.6566	0.672	0.7864	0.6435	0.683	0.6846	0.6436	0.6601	0.7706
CCNL2	157	AT	6.3			0	1	0.678	0.0775	0.3805	0.2744	0.3335	0.2825	0.2908	0.2706	0.254	0.3344	0.3217	0.2883	0.339	0.2714	0.275	0.3371	0.3237	0.2855	0.3083	0.3835	0.3418	0.3224	0.3236	0.3347	0.2	0.328	0.313	0.3507	0.2897	0.3182	0.2618	0.3012	0.3961	0.3434	0.328	0.2136	0.3565	0.317	0.3154	0.3564	0.3399	0.2294
CCNL2	158	AA	7.1	6.1	7.2	0	0.9309	1	0.0773	0.9001	1	0.9282	1	0.9494		0.9588	0.9472	0.9464	1	1	1	0.9614	0.9323	1	0.741	0.9707	1	0.8747	1	0.9696	0.9702	0.9062	0.9462	1	1	1	0.9719	0.8576	0.9804	0.8398	0.9019	1	0.9372	0.9792	1	0.8083	1	0.8939	0.919
CCNL2	160	ES	6.1:7.1	5	7.2	0	0.9873	1	0.2487	0.6952	0.4397	0.9275	0.1922	0.7509	0	0.6104	0.531	0.9003	0.608	0.745	0.3003	0.6953	0.8034	0.6288	0.3551	0.622	0.7164	0.6188	0.7154	0.7345	0.8214	0.8855	0.755	0.6252	0.8624	0.7972	0.8217	0.2856	0.7612	0.8546	0.284	0.4186	0.5027	0.8753	0.7441	0.6115	0.3144	0.8314	0.9021
CCNL2	161	ES	6.1:6.2	5	7.2	0	0.9273	0.7404	0.1687	0.3087	0.1027		0.0696	0.2693	0.5259	0.3121	0.1749	0.2121	0.1733	0.2059	0.0686	0.3191	0.4246	0.1378	0.2884	0.454	0.2243	0.2847	0	0.2347	0.4422	0.3319	0.2244	0.2167	0.2845	0.2898	0.3906	0.1413	0.2526	0.5643	0.0746	0.3133	0.171	0.53	0	0	0.1029	0.5297	0.3229
CCNL2	162	ES	6.1	5	7.2	0	0.8582	0.6603	0.1101	0.1998	0	0.4907	0	0.1388	0.192	0.0622	0.0586	0.3375		0	0	0.0835	0.2304	0	0.1646	0.0477	0	0.1881	0	0.0795	0.1219	0.4476		0	0	0	0.1198	0.0627	0.0618	0.5408	0.0411	0	0.0624	0.1303	0	0.2712	0	0.3613	0.458
CCNL2	163	AA	4.1	3	4.2	0	1	0.0735	0.0122	0.0279	0.0126	0.012	0.011	0.0565	0.0147	0	0.0114	0.0096	0	0.012	0	0.0338	0.0343	0.0166	0.0065	0.0078	0.0203	0.0214	0.0084	0.0059	0	0.0133	0.012	0	0	0.0108	0.0064	0.0135	0.023	0.0285	0.0093	0.012	0.0298	0.0151	0.0054	0.0112	0.0204	0.0181	0.0058
CCNL2	164	AD	1.2	1.1	2	0	0.9982	0.1218	0.0202	0.0037	0.0717	0.0196	0.0246	0.0111	0.0108	0	0.0083	0.0184	0.0152	0	0.021	0.0405	0.0929	0.0063	0.0228	0.0395	0.0282	0.0182	0.0066	0.0199	0.0349	0.0334	0	0.0388	0.0365	0.0168	0.0282	0.0226	0.0073	0.0247	0.0249	0.0243	0.0119	0	0.0035	0.0092	0.0162	0.0144	0.0073
MRPL20	165	AT	4			0	1	0.1141	0.0189	0.9617	0.9416	0.9352	0.9489	0.9664	0.9428	0.9659	0.9682	0.9517	0.9437	0.947	0.9609	0.948	0.9718	0.9627	0.9588	0.9499	0.9335	0.9291	0.8995	0.9091	0.9448	0.9681	0.9352	0.94	0.9344	0.9569	0.9338	0.979	0.9474	0.9622	0.9388	0.9484	0.9799	0.9091	0.9547	0.9544	0.9528	0.9477	0.971
MRPL20	166	AT	3.2			0	1	0.1141	0.0189	0.0383	0.0584	0.0648	0.0511	0.0336	0.0572	0.0341	0.0318	0.0483	0.0563	0.053	0.0391	0.052	0.0282	0.0373	0.0412	0.0501	0.0665	0.0709	0.1005	0.0909	0.0552	0.0319	0.0648	0.06	0.0656	0.0431	0.0662	0.021	0.0526	0.0378	0.0612	0.0516	0.0201	0.0909	0.0453	0.0456	0.0472	0.0523	0.029
ANKRD65	167	ES	2	1.4	3	0	0.9509	1	0.0954	0.1613	0.212	0.2553	0.1505	0.0883	0.1076		0.0717	0.0132	0.1446	0.1095	0.0687	0.079	0.2133	0.0979	0.0956	0.1081	0.1544	0.2514	0.1841	0.103	0.0228	0.0972	0.073	0.0966	0.0304	0.1021	0.1847	0.0338	0.1088		0.0766	0.1123	0.3092	0.1007	0.1296	0.0689	0.0579	0.0437	0.0757
ANKRD65	168	ES	1.4:2	1.3	3	0	0.9109	0.9856	0.1781	0.4818	0.4085	0.5491	0.2837	0.248	0.5132		0.1133	0.0601	0.2717	0.4383	0.2768	0.2549	0.3187	0.3697	0.4071	0.3781	0.3146	0.6308	0.3814	0.2486	0.0899	0.3367	0.1692	0.648	0.1306	0.3406	0.6112	0.0906	0.2833		0.2791	0.2906	1	0.2631	0.4727	0.2926	0.1861	0.1425	0.1888
ANKRD65	169	AD	1.4	1.3	3	0	0.94	0.6552	0.0614	0.8644	0.7534	0.8431	0.7504	0.8209	0.9129		0.7156	0.8691	0.7468	0.8871	0.858	0.8339	0.7038	0.8692	0.8796	0.8789	0.7916	0.8669	0.7886	0.7851	0.8325	0.8875	0.7741	0.9624	0.8426	0.8723	0.9086	0.7848	0.8127	0.852	0.8517	0.802	1	0.7964	0.8935	0.8795	0.8237	0.8157	0.813
ANKRD65	170	RI	1.2	1.1	1.3	0	0.9764	0.8247	0.1457	0.6952	0.4055	0.6789	0.4055	0.6208	0.3401	0.4173	0.799	0.4682	0.5729	0.3328	0.349	0.5889	0.6845	0.4369	0.4226	0.3544	0.5632	0.4396	0.4531	0.4878	0.7646	0.4754	0.6779	0.6167	0.7801	0.5559	0.6661	0.5971	0.6055	0.8037	0.2993	0.2904	0.8418	0.826	0.602	0.7933	0.6627	0.5287	0.6463
VWA1	171	AA	2.1	1	2.2	0	0.9982	0.0769	0.0099	0.9883	0.9818	0.9848	0.9949	0.9838	0.9954	0.9893	0.9849	0.9821	0.9879	1	0.9867	0.9819	0.9852	0.9721	0.9892	0.9909	0.9893	1	0.9926	0.9931	0.9917	0.9911	0.9918	0.987	0.9878	0.9981	0.9681	0.99	0.9938	1	0.9922	0.9963	0.9788	0.9821	0.9684	0.9836	0.9849	0.994	0.9901
ATAD3B	172	AT	8			0	0.9982	0.1485	0.0214	0.034	0.0304	0.0111	0	0.0144	0.0366	0.0078	0.042	0.0342	0.0336	0.0701	0.0183	0.0376	0.037	0.0311	0.021	0	0.0213	0.0492	0.0645	0.0502	0.0144	0.0188	0.045	0.0278	0.0374	0.042	0.0286	0.007	0.0664	0.0201	0.0142	0.0711	0.0195	0.053	0.049	0.0213	0.049	0.0228	0.0247
ATAD3B	173	AT	17			0	0.9982	0.1485	0.0214	0.966	0.9696	0.9889	1	0.9856	0.9634	0.9922	0.958	0.9658	0.9664	0.9299	0.9817	0.9624	0.963	0.9689	0.979	1	0.9787	0.9508	0.9355	0.9498	0.9856	0.9812	0.955	0.9722	0.9626	0.958	0.9714	0.993	0.9336	0.9799	0.9858	0.9289	0.9805	0.947	0.951	0.9787	0.951	0.9772	0.9753
ATAD3A	174	AP	1			0	0.9927	0.4487	0.0788	0.9263	0.7963	0.8784	0.9419	0.9152	1	0.7414	0.9021	0.9272	0.9625	1	0.8341	0.9385	0.8373	0.9607	0.7447	0.9095	0.7408	0.9095	0.8934	0.8341	0.9289	0.8482	0.6995	0.8717	0.9186	0.9234	0.7981	0.879	0.7963	0.9075	0.8221	0.8341	0.8866	0.9132	0.9311	0.8171	0.8747	0.9344	0.7986
ATAD3A	175	AP	2			0	0.9927	0.4487	0.0788	0.0737	0.2037	0.1216	0.0581	0.0848	0	0.2586	0.0979	0.0728	0.0375	0	0.1659	0.0615	0.1627	0.0393	0.2553	0.0905	0.2592	0.0905	0.1066	0.1659	0.0711	0.1518	0.3005	0.1283	0.0814	0.0766	0.2019	0.121	0.2037	0.0925	0.1779	0.1659	0.1134	0.0868	0.0689	0.1829	0.1253	0.0656	0.2014
ATAD3A	176	AA	4.1	3	4.2	0	0.9945	0.7954	0.1602	0.3719	0.6217	0.2454	0.6731	0.2944	0.6621	0.3551	0.5121	0.5288	0.4016	0.5041	0.5789	0.2873	0.2628	0.4255	0.5408	0.5052	0.3457	0.2368	0.5191	0.5196	0.2085	0.5817	0.6199	0.3777	0.3923	0.6003	0.5778	0.1828	0.3813	0.4116	0.3405	0.6611	0.6657	0.5105	0.3501	0.3906	0.3958	0.3777	0.4041
SSU72	179	AT	2.2			0	1	0.4189	0.061	0.3744	0.1476	0.424	0.1327	0.0675	0.12	0.0379	0.0848	0.2092	0.1328	0.0661	0.0734	0.1036	0.0258	0.06	0.0919	0.1006	0.1126	0.188	0.0486	0.0904	0.0681	0.1336	0.0236	0.033	0.1952	0.0828	0.0818	0.0189	0.1591	0.0539	0.0418	0.1102	0.0746	0.1625	0.0869	0.0439	0.0675	0.087	0.038
SSU72	180	AT	5			0	1	0.4189	0.061	0.6256	0.8524	0.576	0.8673	0.9325	0.88	0.9621	0.9152	0.7908	0.8672	0.9339	0.9266	0.8964	0.9742	0.94	0.9081	0.8994	0.8874	0.812	0.9514	0.9096	0.9319	0.8664	0.9764	0.967	0.8048	0.9172	0.9182	0.9811	0.8409	0.9461	0.9582	0.8898	0.9254	0.8375	0.9131	0.9561	0.9324	0.913	0.962
MIB2	181	AP	2			0	0.9891	0.5053	0.0933	0.3351	0.307	0.3228	0.1942	0.1759	0.193	0.5053	0.1552	0.0899	0.2238	0.2024	0.1845	0.2159	0.4649	0.2971	0.2673	0.3113	0.2122	0.2047	0.1643	0.1662	0.332	0.2871	0.2134	0.2785	0.1023	0.3085	0.2762	0.1857	0.1433	0.2971	0.2536	0.2566	0.375	0.2386	0.2922	0.2494	0.2713	0.0864	0.3261
MIB2	182	AP	4			0	0.9891	0.6273	0.0699	0.1253	0.0215	0.0491	0.0258	0.0585	0.1027	0	0.0516	0.1196	0	0.0718	0.1339	0	0.1159	0.0503	0.0555	0.0647	0.0543	0.0302	0.1513	0.0582	0.0477	0.0868	0.0631	0.1995	0.1209	0.0316	0.0765	0.0823	0.2541	0	0.106	0.0325	0.1385	0.0717	0.0333	0.0276	0.111	0.0575	0.1611
MIB2	183	AP	1			0	0.9891	0.8258	0.1142	0.413	0.6537	0.5876	0.7266	0.6448	0.6831	0.4222	0.6866	0.7576	0.7762	0.6961	0.6447	0.7643	0.3233	0.4863	0.6589	0.5706	0.4375	0.6901	0.601	0.6988	0.5808	0.5544	0.6714	0.4984	0.6895	0.5121	0.5587	0.7094	0.5152	0.6452	0.513	0.6303	0.4636	0.6305	0.5827	0.6201	0.5488	0.8086	0.4617
MIB2	184	AP	3.1			0	0.9891	0.4077	0.058	0.1266	0.0178	0.0405	0.0534	0.1208	0.0212	0.0725	0.1066	0.0329	0	0.0297	0.0369	0.0198	0.0958	0.1663	0.0184	0.0535	0.296	0.075	0.0834	0.0769	0.0395	0.0717	0.0521	0.0236	0.0874	0.1478	0.0885	0.0227	0.0875	0.0576	0.1274	0.0806	0.0229	0.0592	0.0918	0.1028	0.0688	0.0475	0.0512
MIB2	188	RI	19.2	19.1	19.3	0	0.8982	0.1147	0.006	1	1	1	1	1	1	1	1	1	1	1	1	1	1	1	1	1	1	1	1	1	1	1	1	1	1	1	1	1	1	1	1	1	1	1	1	1	1	1	1
MIB2	189	ES	19.1:19.2:19.3	18	20	0	0.9727	0.3143	0.04	1	0.9277	0.9514	1	0.9323	1	0.9637	0.9446	0.9789	1	1	1	0.9644	1	0.99	1	0.9749	1	1	1	1	1	0.9507	1	1	1	1	1	0.9525	0.8577	1	0.944	0.9411	0.867	1	1	0.9566	1	1	0.9798
MIB2	191	RI	12.2	12.1	12.3	0	0.9818	0.4553	0.0716	0.0812	0.0806	0.1806	0.1565	0.0357	0.0899	0.0387	0.1265	0.1099	0.0197	0.1036	0.1229	0.1133	0.0782	0.0244	0.2249	0.3817	0.1212	0.2576	0.062	0.2022	0.0442	0.0946	0.0771	0.0881	0.1227	0.1239	0.091	0.0349	0.203	0.0391	0.188	0.1344	0.1744	0.1589	0.0349	0.1451	0.083	0.2549	0.1232
MIB2	192	ES	11	10.2	12.1	0	0.9945	0.1835	0.0279	0.9686	0.9675	0.9828	1	0.9797	1	0.9781	1	1	1	0.9894	1	1	1	1	0.9934	0.9778	1	0.9801	0.9746	0.9729	1	1	1	0.9186	1	1	0.9842	1	0.9511	1	0.9891	1	1	0.983	0.9778	0.9796	1	1	0.9878
MIB2	193	AA	10.1	9	10.2	0	0.9818	0.2924	0.0447	0.9261	0.9754	0.9826	0.9764	0.9009	0.9773	0.9529	0.9135	0.9702	0.8756	0.9462	1	0.898	0.9167	0.9746	0.9631	0.9811	0.9847	0.9764	0.9144	0.971	0.9365	0.935	1	1	0.9229	0.9548	0.9759	0.9509	0.9529	0.9646	0.9427	0.9581	1	0.9196	0.9694	0.9296	0.9296	1	0.9436
MIB2	194	ES	10.1:10.2	9	11	0	0.9964	0.1814	0.0259	0.9847	0.9816	1	1	1	0.9853	1	0.9174	0.9811	0.956	0.9892	0.975	0.8757	1	0.9728	0.9834	0.9638	0.978	0.981	0.9791	0.9572	1	0.9573	0.9425	1	1	0.9583	0.9823	1	1	0.9791	0.8925	1	0.9692	0.9419	1	0.9737	1	0.9491	0.9706
MIB2	196	ES	8	7	9	0	0.9982	0.2556	0.0268	1	0.9365	1	0.9894	1	1	0.9451	1	1	0.9428	1	0.9559	1	0.9548	1	0.952	0.9911	0.9706	1	1	0.9809	1	1	0.8827	0.9264	1	0.992	1	1	0.9872	0.9886	0.9762	0.9591	1	0.9718	0.9676	0.9651	1	1	1
MIB2	197	AD	5.4	5.3	6	0	0.9164	0.3429	0.0633	0.9483	0.9362	0.9194	0.9493	1	0.9393	0.8566	0.9422	1	0.9288	0.9244	1	0.9514	1	0.9627	0.9048	0.867	0.9619	0.9036	0.8508	0.8968	0.9687	0.8996	1	0.8996	1	0.9422	0.8377	1	0.9472	0.9054	0.8953	0.9327	0.8907	0.8645	0.9327	0.9532	1	1	0.7793
MIB2	198	AD	5.3:5.4	5.2	6	0	0.9873	0.654	0.1093	0.8564	0.7873	0.9507	0.8476	0.9486	0.693	0.7029	0.8663	0.5906	0.8579	0.8986	0.9569	0.8435	0.8782	0.9802	0.8244	0.8674	0.8986	0.9276	0.8818	0.8028	0.903	0.8234	0.722	0.74	0.7645	0.8203	0.8522	0.8156	0.953	0.8876	0.6815	0.6706	0.7745	0.8026	0.8518	0.8093	1	0.8123	0.6603
MIB2	200	AA	5.1	3.2	5.2	0	0.8636	0.8049	0.1396	0.4413	0.6842	0.4528	0.2789	0.5752	0.2888	0.5238	0.4037	0.6929		0.5752	0.6701	0.4744	0.5538	0.4895	0.4744	0.5752	0.4183	0.5038	0.3739	0.5582	0.4433	0.5199	0.4037	0.6929	0.6007	0.6083	0.3513		0.6037	0.5538	0.4583	0.4037	0.4037	0.5899	0.7303	0.6701	0.3513	0.6701	0.6328
MMP23B	201	RI	3.6	3.5	3.7	0	0.8382	0.3492	0.0468	0	0.0062	0.0369	0.0254	0.0306	0	0.1387	0.0535	0.1675	0.0668	0	0.0123	0.0238	0.0369	0.0275	0.017	0.0286	0	0.012	0.0129	0.0473		0.0629	0		0.0345	0.0197		0.0605	0.0238	0	0.0689	0.0153	0.1517	0.0594	0	0.1297	0	0.0289	0.0608
MMP23B	202	RI	3.4	3.3	3.5	0	0.9455	1	0.1875	0.171	0.1634	0.2547	0.2683	0.1987	0.2204	0.3249	0.311	0.4539	0.2996	0.2056	0.2568	0.2395	0.1439	0.0991	0.084	0.1732	0.1464	0.0935	0.2683	0.2362	0.5437	0.2529	0.172	0.3909	0.1964	0.1358	0.3143	0.4389	0.2124	0.2683	0.1701	0.1023	0.5354	0.3311	0.1657	0.6471	0.4575	0.2771	0.4698
MMP23B	203	RI	3.2	3.1	3.3	0	0.82	0.498	0.0785	0	0.075	0.1966	0.1333	0.1649	0.1243	0.3621	0.102	0.018	0.0593	0.1362	0.1326	0.048	0.1243	0.0951	0.1158	0.0709	0.3245	0.0689	0.0418	0.2068		0.0418	0.1178		0.1243	0.1365	0.1455	0.1711	0.0491		0.1105	0.0803	0.2211	0.1792	0.2211	0.2015	0.102	0.1851	0.1436
CDK11B	204	AP	1			0	1	0.2012	0.0314	0.9291	0.9504	0.9643	0.9739	0.9741	0.9396	0.9704	0.941	1	0.9599	0.9627	0.9664	0.8953	1	0.9525	0.9574	0.9354	0.9748	0.9782	0.9754	0.9486	0.962	0.9405	0.9604	0.9743	0.9408	0.9777	0.9093	0.9477	0.9797	0.9212	0.9636	0.9229	0.8272	0.9754	0.9685	1	0.9629	1	0.9846
CDK11B	205	AP	2			0	1	0.2012	0.0314	0.0709	0.0496	0.0357	0.0261	0.0259	0.0604	0.0296	0.059	0	0.0401	0.0373	0.0336	0.1047	0	0.0475	0.0426	0.0646	0.0252	0.0218	0.0246	0.0514	0.038	0.0595	0.0396	0.0257	0.0592	0.0223	0.0907	0.0523	0.0203	0.0788	0.0364	0.0771	0.1728	0.0246	0.0315	0	0.0371	0	0.0154
SLC35E2B	207	ES	2	1	3	0	1	0.8083	0.1473	0.8212	0.6102	0.8456	0.543	0.5451	0.549	0.7356	0.5965	0.4706	0.3831	0.5583	0.5289	0.6154	0.6886	0.6226	0.5719	0.6471	0.3387	0.3429	0.5965	0.5333	0.4993	0.6873	0.9139	0.2864	0.7265	0.5451	0.48	0.5106	0.6693	0.5233	0.584	0.5749	0.4796	0.4967	0.3191	0.4651	0.3947	0.444	0.5418
CDK11A	208	AP	1			0	0.9745	0	0	1	1	1	1	1	1	1	1	1	1	1	1	1	1	1	1	1	1	1	1	1	1	1	1	1	1	1	1	1	1	1	1	1	1	1	1	1	1	1	1
CDK11A	210	AP	2.1			0	0.9745	0	0	0	0	0	0	0	0	0	0	0	0	0	0	0	0	0	0	0	0	0	0	0	0	0	0	0	0	0	0	0	0	0	0	0	0	0	0	0	0	0	0
CDK11A	211	AT	12.2			0	1	0	0	0	0	0	0	0	0	0	0	0	0	0	0	0	0	0	0	0	0	0	0	0	0	0	0	0	0	0	0	0	0	0	0	0	0	0	0	0	0	0	0
CDK11A	212	AT	20			0	1	0	0	1	1	1	1	1	1	1	1	1	1	1	1	1	1	1	1	1	1	1	1	1	1	1	1	1	1	1	1	1	1	1	1	1	1	1	1	1	1	1	1
CDK11A	213	AD	11.2	11.1	12.1	0	1	0.4749	0.0745	0.9553	0.8278	0.9084	0.8975	0.8402	0.8784	0.8851	0.9283	0.9017	0.8296	0.9311	0.9474	0.876	0.9164	0.8584	0.8147	0.855	0.9541	0.8534	0.9047	0.8052	0.8647	0.8742	0.8984	0.8456	0.8209	0.8472	0.9164	0.8233	0.8529	0.8173	0.8647	0.8616	0.6518	0.8175	0.8863	0.9119	0.7598	0.75	0.7678
CDK11A	214	AD	7.2	7.1	8	0	0.9673	0.7188	0.1311	0.2434	0.566	0.2617	0.2725	0.3585	0.2759	0.3361	0.141	0.0633	0.2975	0.2619	0.224	0.3361	0.3082	0.2524	0.4257	0.2901	0.5165	0.3131	0.1876	0.3483	0.2312	0.2847	0.2863	0.3278	0.2878	0.3369	0.2791	0.1589	0.2725	0.3857	0.5359	0.4093	0.3311	0.3812	0.2439	0.1742	0.1942	0.2961	0.2339
CDK11A	216	ES	6.2	5	7.1	0	1	0.2292	0.032	0.9597	0.9737	0.9778	0.9709	0.9508	0.9346	0.9721	0.9922	0.9423	0.9664	0.9788	0.946	0.9716	1	0.9597	0.9605	0.9684	0.9421	0.9631	0.9336	0.9547	0.9867	0.9207	0.9653	0.9605	0.9385	0.9638	0.9542	0.9239	0.9654	0.9257	0.9544	0.9235	0.9098	0.9243	0.9666	0.9762	0.9869	0.9754	0.9312
CDK11A	217	AA	6.1	5	6.2	0	1	0.1339	0.0153	0.046	0.0077	0.0436	0.0197	0.0427	0.014	0.0107	0.0201	0.0044	0.023	0.0035	0.0079	0.0214	0.0192	0.029	0.01	0.0088	0.0122	0	0.0282	0.0278	0.0428	0.0141	0.0397	0.0079	0.0521	0.0451	0.0507	0.0372	0.019	0.0246	0.0165	0.0175	0	0.0352	0.0313	0.0075	0.0074	0.0112	0.0317
CDK11A	218	AD	4.2	4.1	5	0	0.9982	0.6141	0.089	0.9471	0.5986	0.7788	0.7303	0.8685	0.7376	0.7932	0.6461	0.6889	0.7489	0.6932	0.6813	0.6266	0.806	0.8162	0.6565	0.6079	0.6443	0.7213	0.5512	0.7664	0.7208	0.6679	0.655	0.5635	0.7531	0.6527	0.723	0.6875	0.7637	0.7376	0.723	0.6098	0.7768	0.6885	0.6746	0.6533	0.7286	0.7929	0.7342
CDK11A	219	RI	2.3	2.2	2.4	0	0.7982	0.7928	0.1568	0.2146	0.2329	0.1248	0.3297	0.1541	0.1202	0.3894	0.1409	0.144	0.0724	0.2015		0.247	0.2546	0.1351	0.2418	0.3235	0.2146	0.247	0.2767	0.5223	0.3235	0.2146		0.5674	0.4385		0.1297	0.1202	0.2146	0.1737	0.1658	0.3042		0.3894	0.2844	0.3129		0.4059	0.4579
CDK11A	220	AD	2.3:2.4	2.2	3	0	0.9927	0.3801	0.0687	0.0896	0.1875	0.0967	0.177	0.0612	0.0483	0.1556	0.065	0.044	0.0326	0.0881	0.0513	0.1357	0.1086	0.0882	0.0849	0.1551	0.1829	0.0938	0.1374	0.15	0.1206	0.1091	0.0864	0.2065	0.1234	0.1357	0.0936	0.042	0.0468	0.1205	0.0677	0.15	0.1861	0.1261	0.0844	0.1188	0.1341	0.1335	0.1904
CDK11A	221	ES	2.4	2.2	3	0	0.9945	0.6486	0.1121	0.2925	0.4596	0.4431	0.321	0.2832	0.2717	0.2181	0.3315	0.2147	0.3041	0.2965	0.3422	0.3194	0.2706	0.408	0.2326	0.3062	0.4619	0.2375	0.309	0.149	0.2456	0.338	0.3361	0.1781	0.1611	0.1659	0.4346	0.2587	0.1716	0.423	0.2803	0.3097	0.3733	0.1921	0.2008	0.2142	0.2519	0.211	0.2153
SLC35E2	222	AT	8			0	0.9964	0.7966	0.1426	1	0.6164	0.4539	0.4962	0.6347	0.6374	0.8581	0.6355	0.4343	0.6818	0.4149	0.4599	0.4826	0.6471	0.4578	0.5115	0.4223	0.4645	0.4344	0.4374	0.5597	0.6166	0.6529	0.4941	0.6438	0.395	0.5175	0.4862	0.7321	0.4864	0.5828	0.6319	0.5543	0.6864	0.2842	0.3341	0.5764	0.5146	0.4497	0.7506
SLC35E2	223	AT	7			0	0.9964	0.7966	0.1426	0	0.3836	0.5461	0.5038	0.3653	0.3626	0.1419	0.3645	0.5657	0.3182	0.5851	0.5401	0.5174	0.3529	0.5422	0.4885	0.5777	0.5355	0.5656	0.5626	0.4403	0.3834	0.3471	0.5059	0.3562	0.605	0.4825	0.5138	0.2679	0.5136	0.4172	0.3681	0.4457	0.3136	0.7158	0.6659	0.4236	0.4854	0.5503	0.2494
SLC35E2	224	ES	2	1	3	0	0.8364	0.8961	0.2467	1	1	0.8686	0.549	0.549	0.3429		1	0.5		1	1		1	0.8	0.4773	0.5106	0.7229	0.7473	1	0.7677	0.6102	0.7928	0.6102	0.3168	1	0.7089	1	1	0.3784	1	0.4298	0.549	1	0.6349	0.6205	0.4651		0.5106	0.4651
NADK	225	AP	3			0	0.9982	0.9153	0.1544	0.5939	0.3982	0.6822	0.4729	0.2869	0.4031	0.7615	0.5084	0.6592	0.5538	0.2678	0.3094	0.4558	0.5032	0.7552	0.2104	0.345	0.6342	0.3439	0.7251	0.4938	0.361	0.5133	0.4628	0.5293	0.4091	0.4945	0.3941	0.5177	0.3085	0.4755	0.4053	0.3093	0.3979	0.4888	0.6099	0.4979	0.6761	0.3368	0.5067
NADK	226	AP	8			0	0.9982	0.698	0.109	0.2897	0.0931	0.1805	0.0918	0.0491	0.123	0.0274	0.1606	0.1157	0.1215	0.097	0.2668	0.0753	0.0946	0.0677	0.1477	0.2119	0.2226	0.0622	0.1527	0.2112	0.3916	0.1991	0.0955	0.4231	0.3393	0.1837	0.1436	0.1541	0.3789	0.1309	0.1138	0.095	0.0997	0.2124	0.1637	0.2621	0.1499	0.2141	0.2416
NADK	227	AP	2			0	0.9982	0.3113	0.0544	0.0511	0.0177	0.0284	0	0.0889	0	0	0.1936	0.1162	0.0439	0	0.0224	0.034	0.0913	0.0816	0.0411	0	0.0503	0.0529	0.0307	0.0196	0.0953	0.0686	0	0	0.1079	0.0492	0.077	0.0398	0	0.071	0.0187	0	0.0722	0.1478	0.0228	0.1054	0.1355	0.0161	0.0243
NADK	228	AP	1			0	0.9982	0.8216	0.1822	0.0653	0.491	0.1088	0.4352	0.5751	0.4738	0.2111	0.1374	0.1089	0.2807	0.6352	0.4014	0.4349	0.3109	0.0956	0.6008	0.4431	0.0929	0.541	0.0915	0.2753	0.1521	0.2191	0.4416	0.0477	0.1436	0.2726	0.3852	0.2884	0.3127	0.3226	0.4622	0.5957	0.4302	0.151	0.2037	0.1346	0.0385	0.4329	0.2274
NADK	229	ES	9.2:10.1	9.1	10.2	0	1	0.4053	0.0585	0.0787	0.0318	0.0831	0.0286	0.0336	0.048	0.0423	0.1274	0.1133	0.0839	0.0795	0.0412	0.0781	0.0327	0.084	0.0472	0.0591	0.0903	0.0532	0.1551	0.115	0.0377	0.1744	0.1065	0.0944	0.0975	0.0998	0.1065	0.0184	0.1164	0.0557	0.0814	0.0248	0.068	0.1491	0.059	0.1097	0.0257	0.0478	0.2805
NADK	230	ES	06:07:00	5	9.1	0	1	0.1197	0.0154	0.0098	0.0132	0.0333	0.0203	0.0077	0.0161	0.0125	0.0224	0.0084	0.0028	0.0098	0.0298	0.0369	0.0085	0.0136	0.008	0.0268	0.0443	0.016	0.015	0.0455	0.0203	0.0403	0.0124	0.0223	0.0299	0.0421	0.0314	0.0042	0.0391	0.0215	0.0259	0.0132	0.0041	0.0388	0.0099	0.018	0.0215	0.0252	0.0274
GNB1	231	ES	2	1	3	1	0.9909	0.1531	0.0256	0.9055	0.9486	0.8844	0.9529	0.8804	0.9341	0.9314	0.9001	0.8887	0.9263	0.8873	0.9414	0.9487	0.9204	0.9205	0.953	0.9447	0.926	0.9289	0.9009	0.9112	0.9198	0.9208	0.9068	0.9479	0.9001	0.9268	0.9098	0.9698	0.8961	0.9122	0.9248	0.9548	0.9212	0.8864	0.8345	0.8978	0.9232	0.9237	0.9299
PRKCZ	235	AP	8			0	0.9691	0.8705	0.1121	0	0.0723	0	0.1165	0	0.1399	0	0	0	0	0	0.1641	0	0	0	0.1413	0.1449	0	0	0.0197	0	0.0252	0.0264	0.03	0.0312	0	0	0.0638	0	0	0	0.0461	0.3248	0	0	0	0	0.053	0	0.0168
PRKCZ	236	AP	6			0	0.9691	0.191	0.018	0	0	0	0	0	0.0144	0	0.0644	0.0559	0	0	0	0.0271	0	0	0	0	0	0	0	0	0	0	0.0241	0	0	0	0	0	0	0	0.0206	0	0	0	0	0	0.0356	0	0
PRKCZ	237	AP	7			0	0.9691	0.1183	0.0168	0	0.009	0.0159	0	0	0.0188	0	0	0	0	0	0	0	0	0	0.0088	0	0	0	0	0	0	0	0	0	0	0	0.0556	0	0	0	0	0.0129	0	0	0	0.0402	0	0	0
PRKCZ	238	AP	11			0	0.9691	0.5149	0.0805	0.1062	0.1095	0.0966	0.0869	0.4021	0.1284	0	0	0.1658	0.1198	0	0.1338	0.0536	0	0	0.0802	0.032	0.0216	0.081	0.0523	0.1176	0.0334	0.105	0.0318	0.0827	0.1079	0.1986	0	0.0591	0.328	0.1078	0.0407	0.0391	0	0.0486	0.1404	0.0611	0.0703	0	0.067
PRKCZ	239	AP	5			0	0.9691	0.2281	0.0251	0	0.0045	0	0.0223	0	0	0.0113	0	0	0	0.0824	0.0055	0	0	0	0	0	0	0.0267	0	0	0	0.0116	0.0236	0	0	0.0109	0	0	0.0361	0.0119	0.0202	0	0	0	0	0	0.0232	0	0
PRKCZ	240	AP	1			0	0.9691	0.9107	0.1394	0.8938	0.8047	0.8875	0.7743	0.5979	0.6986	0.9887	0.9356	0.7783	0.8802	0.9176	0.6966	0.9193	1	1	0.7697	0.8231	0.9784	0.8923	0.928	0.8824	0.9414	0.8571	0.8905	0.8861	0.8921	0.7905	0.8806	0.9409	0.6359	0.8803	0.8725	0.6231	1	0.9514	0.8596	0.8986	0.8179	1	0.9162
PRKCZ	243	ES	22	21	23	0	1	0.1119	0.0204	0.0165	0.0242	0.0473	0.0156	0.0104	0.0256	0.0158	0.01	0.0332	0	0.0577	0.0108	0.0363	0	0.0312	0.0333	0.0288	0.0211	0.0294	0.0586	0.0308	0.0271	0.0498	0.0367	0.0496	0.0955	0.0381	0.0604	0.029	0.0417	0.0192	0.066	0.0093	0.1113	0.0467	0.0108	0.0434	0.01	0.0367	0.0167
C1orf86	244	AP	1			0	0.9982	0.5598	0.0929	0.0432	0.0505	0.0379	0.0849	0.0701	0.1431	0.0252	0.0937	0.2276	0.0649	0.1268	0.0333	0.026	0.0443	0.0668	0.1079	0.0271	0.014	0.0212	0.1158	0.0192	0.0172	0.099	0.1102	0.054	0.2363	0.019	0.0731	0.1468	0.085	0	0.0676	0.0154	0.0878	0.0641	0.0644	0.0282	0.0827	0.0452	0.0555
C1orf86	245	AP	3			0	0.9982	0.5598	0.0929	0.9568	0.9495	0.9621	0.9151	0.9299	0.8569	0.9748	0.9063	0.7724	0.9351	0.8732	0.9667	0.974	0.9557	0.9332	0.8921	0.9729	0.986	0.9788	0.8842	0.9808	0.9828	0.901	0.8898	0.946	0.7637	0.981	0.9269	0.8532	0.915	1	0.9324	0.9846	0.9122	0.9359	0.9356	0.9718	0.9173	0.9548	0.9445
C1orf86	246	AT	7.2			0	1	0.8465	0.0815	0.7494	0.5333	0.739	0.4642	0.6861	0.5078	0.7272	0.6495	0.6759	0.7349	0.6124	0.4719	0.7429	0.7085	0.6786	0.5283	0.5491	0.7163	0.7301	0.624	0.6892	0.8136	0.5502	0.5956	0.5961	0.5762	0.6791	0.7715	0.651	0.5887	0.7012	0.6408	0.5752	0.7416	0.6259	0.703	0.5607	0.6965	0.6974	0.6085
C1orf86	247	AT	10			0	1	0.8465	0.0815	0.2506	0.4667	0.261	0.5358	0.3139	0.4922	0.2729	0.3505	0.3241	0.2651	0.3876	0.5281	0.2571	0.2915	0.3214	0.4717	0.4509	0.2837	0.2699	0.376	0.3108	0.1864	0.4498	0.4044	0.4039	0.4238	0.3209	0.2285	0.349	0.4113	0.2988	0.3592	0.4248	0.2584	0.3741	0.297	0.4393	0.3035	0.3026	0.3915
C1orf86	248	ES	6:7.1:8:9	5	10	0	0.9182	1	0.135	0.0417	0.5853	0.1631	0.5636		1	0.1844	0.0384	0.2391	0.2934	0.0911	0.1024	0.3485	0.1162	0.1303	0.1446	0.4054	0.2886	0.0949	0.2737	0.1899	0.1443	0.2538	0.0997	0.0981	0.0897	0.0445	0.2894	0.1328	0.1766	0.0395	0.0676	0.373	0.035	0.0492	0.0388	0.0686			0.0873
C1orf86	249	ES	7.1:8:9	5	10	0	0.9327	1	0.1656	0.1319	0.6234	0.276	0.6017		1	0.211	0.046	0.4625	0.3508	0.1073	0.2336	0.4377	0.1493	0.1737	0.3411	0.6292	0.3671	0.2663	0.3497	0.5452	0.1679	0.2858	0.3625	0.2989	0.1182	0.1709	0.3425	0.1519	0.2165	0.1623	0.2657	0.4279	0.0413	0.2722	0.1853	0.2159			0.4208
C1orf86	250	ES	6	5	7.1	0	1	0.8831	0.0894	0.2748	0.2943	0.4144	0.4474	0.2928	0.4011	0.2511	0.1989	0.3438	0.3057	0.3228	0.3479	0.2122	0.252	0.2654	0.3241	0.3633	0.2482	0.2947	0.3455	0.2276	0.2295	0.3505	0.2202	0.2866	0.3577	0.2477	0.2975	0.4456	0.3998	0.2325	0.2381	0.3657	0.3688	0.1598	0.1953	0.2737	0.2958	0.3144	0.1647
C1orf86	251	ES	4	3	5	0	0.9982	0.2395	0.0218	0.9541	0.9902	0.9772	0.9869	0.9483	0.9763	0.9552	0.9448	0.9789	0.9872	0.9837	0.9822	0.9504	0.9278	0.9977	0.9739	0.9815	0.9808	0.9447	0.9624	0.9675	0.948	0.9648	0.9599	0.9565	0.9732	0.9673	0.9886	0.9761	0.9636	0.9863	0.9637	0.9867	0.9404	0.9429	0.9653	0.9463	0.9632	0.9696	0.9569
MORN1	252	AT	8			0	0.9764	1	0.199	0.2212	0.0952	0.5153	0.0425	0.3096	0.2717	0.3635	0.254	0.394	0.167	0.0095	0.0434	0.2073	0.3967	0.1786	0.1454	0.1777	0.2537	0.3962	0.3585	0.2885	0.1149	0.5699	0.1995	0.0623	0.114	0.3238	0.1795	0.4001	0.2533	0.0737	0.2454	0.2227	0.1208	0.2186	0.1753	0.1734	0.4854	0.0827	0.3901
MORN1	253	AT	17			0	0.9764	1	0.2283	0.707	0.8018	0.3109	0.8333	0.5396	0.5582	0.1056	0.5976	0.2576	0.6238	0.8232	0.9082	0.6196	0.3457	0.5604	0.7818	0.7152	0.5121	0.2354	0.4828	0.6412	0.512	0.326	0.6726	0.7962	0.7044	0.5249	0.7252	0.4903	0.6622	0.7109	0.1871	0.5822	0.5263	0.7004	0.674	0.7253	0.3626	0.7564	0.4675
MORN1	254	AT	13			0	0.9764	0.7483	0.1486	0.0718	0.103	0.1737	0.1242	0.1508	0.1701	0.531	0.1484	0.3484	0.2091	0.1673	0.0483	0.1731	0.2576	0.2609	0.0728	0.1071	0.2341	0.3683	0.1587	0.0702	0.3731	0.1041	0.1278	0.1415	0.1816	0.1514	0.0953	0.1096	0.0846	0.2154	0.5675	0.1952	0.3529	0.081	0.1506	0.1013	0.152	0.161	0.1425
MORN1	255	ES	2	1	3	0	0.7836	0.5217	0.1089	0.6581	1	0.8715	0.898	0.8148	1		0.8148	1		0.7814	0.837	0.7938	1	0.6413	0.9154	0.9267	1	0.7938	0.5238	1	0.873	1	0.9016	0.7333	0.8851	1	0.8851	0.8319	0.6581	0.9191	0.7122	0.8148	1	0.8266	0.8148		0.7938	1	1
RER1	256	AP	1			0	1	0.4447	0.0793	0.9358	0.8899	0.8304	0.8027	0.9386	0.8502	0.9304	0.9401	0.7222	0.8886	0.8488	0.8594	0.9235	0.9381	0.9608	0.8599	0.8666	0.8722	0.8813	0.8446	0.8428	0.9126	0.7972	0.8397	0.8805	0.7493	0.8957	0.8161	0.903	0.8021	0.9226	0.8466	0.9171	0.9738	0.7133	0.884	0.8674	0.8475	0.8447	0.7953
RER1	257	AP	2.1			0	1	0.4447	0.0793	0.0642	0.1101	0.1696	0.1973	0.0614	0.1498	0.0696	0.0599	0.2778	0.1114	0.1512	0.1406	0.0765	0.0619	0.0392	0.1401	0.1334	0.1278	0.1187	0.1554	0.1572	0.0874	0.2028	0.1603	0.1195	0.2507	0.1043	0.1839	0.097	0.1979	0.0774	0.1534	0.0829	0.0262	0.2867	0.116	0.1326	0.1525	0.1553	0.2047
RER1	260	AA	6.1	5	6.2	0	1	0.1338	0.0173	0.0365	0.0444	0.0362	0.0479	0.0334	0.0304	0.0169	0.0302	0.0798	0.037	0.0526	0.0397	0.0517	0.0354	0.0454	0.0454	0.0599	0.0338	0.0415	0.0536	0.0546	0.0411	0.0439	0.0541	0.0439	0.0628	0.0502	0.0643	0.0436	0.0567	0.0436	0.0489	0.0299	0.0492	0.0464	0.0476	0.0338	0.0433	0.0446	0.0426
RER1	261	ES	4	3	5	0	1	0.0522	0.0062	0.9953	0.9888	0.9934	0.9846	0.9906	0.9973	0.9928	0.9938	0.9903	0.9856	0.9859	1	0.9927	0.9867	0.9954	0.9935	0.987	0.9839	0.9852	0.998	0.9917	0.9945	0.9953	0.9951	0.9855	0.985	0.9968	1	0.9986	0.9792	0.9982	0.9916	0.9979	0.9917	0.9932	0.9966	0.9964	0.9886	0.9888	0.9902
PEX10	265	AA	7.1	6	7.2	0	0.9964	0.0323	0.0015	1	1	1	1	1	1	1	1	1	1	1	1	0.9677	1	1	1	1	1	1	1	1	1	1	1	1	1	1	1	1	1	1	1	1	1	1	1	1	1	1	1
PEX10	266	AA	5.1	4.2	5.2	0	0.9964	0.3313	0.0471	0.0931	0.0783	0.1383	0.0798	0.0394	0.0692	0.0634	0.1196	0.072	0.0735	0.0492	0.0303	0.0407	0.0089	0.0638	0.0683	0.0448	0.1699	0.0224	0.0902	0.1207	0.2362	0.1703	0.117	0.072	0.1421	0.108	0.0902	0.1464	0.1423	0.0916	0.0658	0.0282	0.1167	0.104	0.1328	0.08	0.0768	0.1042	0.104
PEX10	267	ES	4.2:5.1	4.1	5.2	0	0.7618	0.7307	0.1531	0.8462		0.8311	0.6696			1	0.6069	0.4648		0.5366				0.5602	0.839		0.924			1	0.8344	0.6267	0.9223		0.7611	0.6798		0.6852	0.8742	0.9206	0.5657		0.6587	0.6069	0.7666	0.6351	0.5746	0.7226	0.6073
PEX10	268	AD	4.2	4.1	5.2	0	0.9982	0.2384	0.0308	0.9824	1	0.9679	0.9583	0.9327	0.9132	1	0.9178	0.9183	0.9674	0.9577	1	0.9652	0.9844	0.9508	0.9864	0.9503	0.9839	1	0.9305	1	0.943	0.8916	0.9891	0.9787	0.9503	0.9478	1	0.9268	0.9787	0.9915	0.9491	1	0.9362	0.9289	0.9553	0.9526	0.9421	0.9565	0.9305
PEX10	269	ES	2	1	3	0	0.8909	0.879	0.114	0.0447	0	0.1289	0.0429	0.1301		0.0783	0.1266	0.3043	0.109	0.014		0	0.0239	0.049	0.0602	0.1585	0.025	0.144	0.1266	0.0998	0.0796	0.212	0.1203	0.2592	0.3332	0.1068	0.1612	0.0346	0.3043	0.042	0.0714	0.1612	0.0585	0.1462	0.0511	0.0404	0.0701	0.0972	0.2187
PLCH2	272	AT	23.2			0	0.9964	0.5675	0.1012	0.8353	0.8012	0.6856	0.5851	0.7013	0.5514	0.7863	0.8131	0.6928	0.8258	0.7492	0.7762	0.7351	0.77	0.7362	0.7125	0.6649	0.7193	0.7857	0.6579	0.7406	0.809	0.7666	0.6826	0.7512	0.7488	0.7398	0.7465	0.7743	0.6428	0.8399	0.7111	0.7117	0.733	0.6581	0.7313	0.8082	0.7788	0.5898	0.7133
PLCH2	273	AT	22.3			0	0.9964	0.5675	0.1012	0.1647	0.1988	0.3144	0.4149	0.2987	0.4486	0.2137	0.1869	0.3072	0.1742	0.2508	0.2238	0.2649	0.23	0.2638	0.2875	0.3351	0.2807	0.2143	0.3421	0.2594	0.191	0.2334	0.3174	0.2488	0.2512	0.2602	0.2535	0.2257	0.3572	0.1601	0.2889	0.2883	0.267	0.3419	0.2687	0.1918	0.2212	0.4102	0.2867
PLCH2	274	ES	22.2:23.1	22.1	23.2	0	0.8618	0.9242	0.2481	0.283	1	0.501	1	0.4079	0.5795	0.3809	0.4651	0.5557	0.5751	0.4656	0.228	0.4301	0.228	0.626	0.6745	0.7799	0.3672	0.2583	0.705	0.3785	0.4164	0.8392	0.7119	0.6622	0.4176	0.6893	0.39	0.597	0.7791	0.4406	0.4648	0.5686	0.7699	0.642	0.5872	0.3209	0.863	0.5638	0.6686
PLCH2	275	ES	17	16	18	0	0.8855	0.6034	0.0902	0.9756	1	0.9081	1	0.8778	0.8178	1	0.814	0.9883	0.9653	0.9716	1	0.9377	1	0.9944	0.9565	0.9238	1	0.9678	0.9517	0.9354	0.9489	0.8951	0.9286	0.9423	0.9238	0.9213	0.965	0.8771	0.9621	0.9287	0.6091	1	0.7118	0.9029	0.9771	0.933	0.914	1	0.8435
PLCH2	276	ES	4.2:5.1:5.2:6:7:8:9:10:11:12:13:14:15:16:17:18	4.1	19	0	0.9727	0	0	1	1	1	1	1	1	1	1	1	1	1	1	1	1	1	1	1	1	1	1	1	1	1	1	1	1	1	1	1	1	1	1	1	1	1	1	1	1	1	1
PLCH2	278	ES	4.2:5.1:5.2:6:7:8:9:10:11:12:13:14:15:16:18	4.1	19	0	0.7655	0	0	1	1	1	1		1		1	1	1	1		1		1	1	1		1	1	1	1	1	1	1	1	1	1	1	1	1	1		1	1	1	1	1		1
PANK4	282	ES	2.5:3.1	2.4	3.2	0	1	0.0374	0.0062	1	1	1	0.9823	1	1	1	0.9868	1	1	1	1	1	1	1	0.9695	1	1	1	1	1	1	1	1	1	1	1	1	1	1	1	1	1	1	1	1	0.982	0.981	1	1
PANK4	283	RI	2.3	2.2	2.4	0	0.9964	0.292	0.0297	0.0081	0	0	0.0328	0.0069	0.0524	0.0103	0.0033	0.0307	0.0193	0	0.0214	0.1256	0.0457	0.004	0.0448	0.0578	0.0862	0.0492	0.0555	0.1032	0	0.0286	0.0235	0	0.0644	0.0653	0.0481	0.003	0.0186	0	0	0.0461	0.0182	0.0464	0.0149	0.0053	0.0101	0.0295	0.0339
PANK4	284	AA	2.1	1	2.2	0	0.9473	0.0876	0.0116	0	0	0	0	0	0.0338	0	0	0	0	0	0	0.025	0	0	0.014	0	0.0146	0	0	0.0235	0	0.0267	0.0243	0	0	0	0.0131	0	0	0	0	0.0277	0	0	0.004	0.0146	0	0	0
TNFRSF14	285	AP	1			0	1	0.2692	0.0245	0.01	0.0106	0	0	0	0	0	0.0473	0.0368	0.0437	0.0174	0	0.0168	0.0488	0.0209	0.0143	0.0049	0.0116	0.0198	0	0	0.0084	0.014	0.0028	0	0	0	0	0.0322	0.0102	0.0244	0	0.0078	0.0227	0.0384	0.0222	0	0.0227	0.0176	0
TNFRSF14	286	AP	2.1			0	1	0.2692	0.0245	0.99	0.9894	1	1	1	1	1	0.9527	0.9632	0.9563	0.9826	1	0.9832	0.9512	0.9791	0.9857	0.9951	0.9884	0.9802	1	1	0.9916	0.986	0.9972	1	1	1	1	0.9678	0.9898	0.9756	1	0.9922	0.9773	0.9616	0.9778	1	0.9773	0.9824	1
TNFRSF14	289	AA	7.1	6	7.2	0	1	0.5239	0.1029	0.2892	0.2073	0.3325	0.228	0.1669	0.2504	0.2792	0.1703	0.2499	0.1996	0.2555	0.1858	0.2599	0.2513	0.1663	0.2713	0.2527	0.3399	0.2302	0.3376	0.2875	0.1523	0.3034	0.3041	0.3201	0.3435	0.3152	0.2837	0.1951	0.4111	0.3083	0.3148	0.1859	0.2685	0.3794	0.2183	0.2758	0.1995	0.2649	0.2462
FAM213B	290	AA	6.1	5	6.2	0	0.9945	0.6024	0.0851	0.5913	0.6154	0.5409	0.7628	0.6291	0.6012	0.5946	0.5455	0.6994	0.7404	0.6252	0.5789	0.5277	0.6404	0.5009	0.6257	0.625	0.7222	0.5602	0.6111	0.6957	0.6037	0.5182	0.7286	0.5828	0.5173	0.6981	0.5478	0.6429	0.6802	0.4438	0.6102	0.6809	0.656	0.5833	0.5426	0.6353	0.5789	0.6549	0.6272
FAM213B	291	ES	5:6.1:6.2	4.2	6.3	0	0.9964	0.0784	0.0046	1	1	1	1	1	1	1	1	1	1	1	1	1	1	1	1	1	1	1	1	1	1	1	1	1	1	1	1	1	1	1	1	1	1	1	1	1	1	1	1
FAM213B	292	ES	00:05:06.200000	4.2	6.3	0	0.9945	0.089	0.0061	1	1	1	1	1	1	1	1	1	1	1	1	1	1	1	1	1	1	1	1	1	1	1	1	1	1	1	1	1	1	1	1	1	1	1	1	1	1	1	1
FAM213B	293	AA	4.1	3	4.2	0	0.9909	0.3826	0.0452	0.0526	0.1251	0.1514	0.0352	0.0472	0.0202	0.2366	0.0557	0.0518	0.0511	0.0359	0.0813	0.0202	0.0813	0.0566	0.0475	0.0545	0.1409	0.0728	0.0524	0.0902	0.0661	0.0664	0.035	0.0965	0.2366	0.0316	0.0301	0.0271	0.0403	0.0829	0.0509	0.0362	0.0858	0.0313	0.033	0.0242	0.0439	0.0813	0.0628
ARHGEF16	307	AP	1			0	0.8018	1	0.2407	0.8078	0.211	0.6263	0	0.3396		0.8486	0.2594	0.2466		0.1712		0.1334	0.4371	0.5497	0.212	0.2391	0.5165	0.5942	0.224	0.3638	0.4821	0.3478	0.2143	0.2167	0.1662	0.3593	0.3835	0.3053	0.2297	0.5344	0.1041	0.5033		0.223	0.2673	0.4294	0.3015	0.214	0.0947
ARHGEF16	308	AP	4.1			0	0.8018	0.8771	0.1623	0.1922	0.6273	0.1927	0.7427	0.2424		0.1514	0.7406	0.2933		0.3309		0.2041	0.0867	0.1656	0.1513	0.4267	0.0643	0.279	0.2498	0.3141	0.086	0.4513	0.3278	0.1289	0.6426	0.2137	0.2083	0.2043	0.3354	0.1004	0.4512	0.2245		0.3061	0.106	0.1642	0.3586	0.1388	0.5915
ARHGEF16	309	AP	3.1			0	0.8018	0.7524	0.1495	0	0.1617	0.0497	0.1367	0.0391		0	0	0.2268		0.2953		0.3726	0.2792	0.0821	0.2926	0.0916	0.2486	0	0.1288	0.1079	0.1386	0.0727	0.2716	0.1661	0.1911	0.2504	0.3067	0.2194	0.096	0.194	0.4447	0.1447		0.1578	0.2049	0.2821	0.2889	0.1342	0.2178
ARHGEF16	310	AP	7			0	0.8018	0.8059	0.1458	0	0	0.1314	0.1206	0.3789		0	0	0.2334		0.2026		0.29	0.197	0.2027	0.3441	0.2425	0.1706	0.1269	0.3975	0.2142	0.2933	0.1283	0.1863	0.4883	0	0.1767	0.1015	0.271	0.3389	0.1712	0	0.1276		0.3131	0.4217	0.1244	0.051	0.513	0.0961
MEGF6	311	AP	1			0	0.8782	0.8604	0.1641	0.3899	0.1421	0.4139	0.2075	0.038	0.0428	0.1138	0	0	0	0.128	0.2684	0.1182	0.2402	0.1265	0.2189	0.6378	0.1462	0.0603	0.0466	0.4046	0.2551	0.2356	0.0655	0.0622	0	0.2108	0.0769	0.0953	0.0437	0	0.2678	0.7824	0.2551	0.0854	0.3832	0	0	0	0.2402
MEGF6	312	AP	6			0	0.8782	0.8604	0.1641	0.6101	0.8579	0.5861	0.7925	0.962	0.9572	0.8862	1	1	1	0.872	0.7316	0.8818	0.7598	0.8735	0.7811	0.3622	0.8538	0.9397	0.9534	0.5954	0.7449	0.7644	0.9345	0.9378	1	0.7892	0.9231	0.9047	0.9563	1	0.7322	0.2176	0.7449	0.9146	0.6168	1	1	1	0.7598
MEGF6	313	ES	39	38	40	0	0.9818	0.0185	0.0014	1	1	1	1	1	1	1	1	1	1	1	1	1	1	1	1	1	1	1	1	0.9941	1	1	1	1	1	1	0.9815	1	1	1	1	1	1	1	1	1	1	1	1
MEGF6	314	ES	00:36:37.100000	35	37.2	0	0.9964	0.1003	0.0077	0.997	1	0.9867	1	1	1	1	1	0.9896	1	1	0.9896	1	1	1	0.9961	1	1	1	0.9923	1	1	1	1	1	1	1	1	1	1	1	1	1	1	1	1	1	1	1	1
MEGF6	315	ES	31	30	32	0	0.9582	0.8055	0.1703	0.6357	0.7536	0.6154	0.9356	0.7107	0.9355	0.5455	0.5455	0.6591	0.8039	0.6897	0.8889	0.5817	0.4	0.7059	0.9859	0.9213	0.9398	0.6774	0.4891	0.6694	0.5082	0.7596	0.3086	0.3865	0.6053	0.7455	0.7926	0.7959	0.566	0.6446	0.6154	0.9024		0.6341	0.4124	0.2484	0.5133	0.7945	0.7541
MEGF6	317	ES	1 day, 2:27:00	25	28	0	0.9818	0.421	0.0625	0.8922	0.9496	0.8847	1	1	1	1	0.8845	0.964	1	0.9521	1	0.8654	1	0.9244	1	1	0.9583	0.9645	0.9777	0.8918	0.9103	0.9307	0.9916	0.9326	0.9328	0.9791	1	0.9745	0.9804	0.8579	0.9735	1	1	0.9029	0.8351	1	0.9357	1	1
TPRG1L	319	ES	3	2	4	0	1	0.0441	0.0051	0.9977	0.9881	0.994	1	0.9912	0.9933	0.9959	1	1	1	1	0.9941	1	1	0.9985	1	0.9941	0.9961	1	1	0.9884	0.9943	1	0.991	1	0.9942	1	1	0.9927	1	0.9899	0.9958	0.9854	1	1	0.9958	1	1	0.9879	0.9891
WRAP73	320	RI	11.2	11.1	11.3	0	1	0.542	0.0946	0.3786	0.5558	0.3149	0.3836	0.4677	0.2652	0.3405	0.2771	0.4311	0.2503	0.2983	0.2517	0.261	0.4003	0.2327	0.3605	0.3311	0.3796	0.3408	0.3289	0.3857	0.4183	0.4253	0.3418	0.4266	0.5655	0.3759	0.3918	0.2065	0.4249	0.2455	0.4334	0.3096	0.3285	0.459	0.4291	0.6914	0.3789	0.433	0.3994
TP73	325	ES	15	14	16	0	0.9236	0.529	0.0876	0.7881	0.6851	0.6663		0.8286		0.8823	1	0.8938	0.8186	0.7921	0.8788	0.8547	0.9122	0.9077	0.868	0.8447	0.853	0.9345	0.9069	0.9155	0.9341	0.8131	0.9785	0.9213	0.9484	0.9531	0.915	0.8341	0.8969	0.7326	0.9527	1	0.8915	0.7048	0.8824	0.9682	0.9312	0.8043	1
TP73	327	ES	13:14:15	12	16	0	0.9636	0.1586	0.0119	0.9962	1	1		1		1	1	1	1	0.9945	1	1	1	1	1	1	1	1	1	1	1	1	1	1	1	1	1	1	1	1	1	1	1	1	1	1	0.9817	1	1
TP73	330	ES	13:14:00	12	16	0	0.76	0.4128	0.0414	0.9923	1	1		1	1	1		1	1	0.989	1	1	1	1	1	1	1	1	1	1	1	1	1	1	1	1	1	1	1	1	1			1	1		0.8913	1
TP73	332	ES	13	12	14	0	0.9545	0.2778	0.0482	0.9001	1	0.8495		1	1	1	1	0.9835	0.7959	0.9825	1	0.9273	1	0.9692	0.9803	1	1	0.9484	0.9807	0.9474	0.9811	0.9497	0.9848	0.9691	0.9354	1	0.981	1	0.9906	0.8337	0.9723	1	0.7222	0.9459	0.9443	0.9441	1	1	1
TP73	333	ES	13:14:00	12	15	0	0.9455	0.191	0.0098	1	1	1		1		1	1	1	1	1	1	1	1	1	1	1	1	1	1	1	1	1	1	1	1	1	1	1	1	1	1	1	1	1	1	1	1	1	1
SMIM1	337	AT	3.2			0	0.9364	0.401	0.0595	0.0324	0.0402	0.013	0.1309	0.0803	0.0717		0.0372	0	0.0873	0.0471	0.0478	0.0717	0	0	0.0681	0.0873	0.0402	0	0.0628	0.0189	0	0.0606	0.0669		0	0.0972		0	0.0271	0.1464	0.1792	0.0214	0.1506	0.0335	0.0913		0	0	0.1085
SMIM1	338	AT	4			0	0.9364	0.401	0.0595	0.9676	0.9598	0.987	0.8691	0.9197	0.9283		0.9628	1	0.9127	0.9529	0.9522	0.9283	1	1	0.9319	0.9127	0.9598	1	0.9372	0.9811	1	0.9394	0.9331		1	0.9028		1	0.9729	0.8536	0.8208	0.9786	0.8494	0.9665	0.9087		1	1	0.8915
CEP104	339	AT	23			0	1	0.1105	0.0169	0.9899	0.9938	0.9804	0.9871	0.9805	1	0.988	0.9864	0.9756	1	0.9875	0.9918	1	0.9782	0.9762	0.9658	1	1	0.9835	0.9931	0.9869	0.9917	0.9584	0.9778	0.9665	0.9728	0.9732	0.924	0.9821	0.9937	1	0.9722	0.9899	0.8907	0.9707	0.9687	1	1	0.9406	0.9469
CEP104	340	AT	7			0	1	0.1105	0.0169	0.0101	0.0062	0.0196	0.0129	0.0195	0	0.012	0.0136	0.0244	0	0.0125	0.0082	0	0.0218	0.0238	0.0342	0	0	0.0165	0.0069	0.0131	0.0083	0.0416	0.0222	0.0335	0.0272	0.0267	0.076	0.0179	0.0063	0	0.0278	0.0101	0.1093	0.0293	0.0313	0	0	0.0594	0.0531
DFFB	346	ES	5	4.3	6	0	0.82	1	0.2064		0.4644	0.524	0.5438	0.5362	0.4644	0.0978	0.3024	0.6843	0.4843	0.6243				0.2945	0.2454	0.287	0.7762	0.6843	0.6515	0.4428	0.7137	0.5996	0.5201	0.6731	0.6065		0.689	0.2922	0.3843		0.5362	0.6692	0.394	0.4159	0.4263	0.6342	0.8321	0.4644	0.5811
AJAP1	352	AT	6			0	0.8509	0.9385	0.3045	0.8708	0	0.6961	0.3979	0.5167	0.5634	0.7412	0.5488	0.766	0	0.4922	0.6159	0.584	0		0.4823	0.3665	0.6333	0.4425	0.5595	0.7541	0	0.8928	0.5402	0.45	0	0.8017	0		0.456	0	0.4813	0.56	0.9385	0	0.5669			0.574	0.7925
AJAP1	353	AT	7			0	0.8509	0.9385	0.3045	0.1292	1	0.3039	0.6021	0.4833	0.4366	0.2588	0.4512	0.234	1	0.5078	0.3841	0.416	1		0.5177	0.6335	0.3667	0.5575	0.4405	0.2459	1	0.1072	0.4598	0.55	1	0.1983	1		0.544	1	0.5187	0.44	0.0615	1	0.4331			0.426	0.2076
NPHP4	355	ES	20	19	21	0	0.8218	0.6661	0.0825	0.0479	0.1153	0.0698	0.0554	0	0.0858	0.0209	0.105	0.034	0.0554	0.0977	0.0944	0.0554		0.1306	0.0479	0.0398	0.0891	0.0219	0.1543	0.0673	0.2383	0.0448	0.0432	0	0.2149	0.0914	0.1279	0.0554		0.0858	0.0936	0.1353		0.2027	0.0466	0.1581	0.1135	0.0303	0.0479
NPHP4	357	ES	00:13:14.100000	11	14.2	0	0.8382	0.5029	0.0623	0.8381	1	1	1	1	1	1	1	1	0.8359	1	0.7969	1		1	1	1	1	0.8866	1	1	1	1	0.9177	1	1	0.8594	1	0.9175	1	1	1	1	1	0.9268	1	1	1	1
NPHP4	358	ES	12:13:00	11	14.2	0	0.8691	0.3876	0.0572	0.766	1	1	1	1	1	1	1	1	0.8656	1	0.947	1	1	1	1	1	1	0.9344	1	1	1	1	0.9518	1	1	0.8412	1	0.9184		1	1	1	1	0.9447	1	1	1	1	1
NPHP4	359	ES	7	6	8	0	0.9491	0.4535	0.0551	1	1	0.8741	1	1	1	1	0.8756	1	0.8814	0.9337	1	1	1	1	0.969	0.9354	1	1	1	1	0.9105	1	1	1	1	1	1	0.9462	1	0.9548	0.9686	1	1	0.8382	0.9591	1	1	1	1
KCNAB2	360	AP	2			0	0.9727	0.9834	0.1861	0.3666	0.2475	0.455	0.0797	0.1256	0.0443	0.1897	0.3517	0.1576	0.202	0.2348	0.1312	0.1844	0.5119	0.2744	0.0939	0.0938	0.3143	0.1016	0.3246	0.1084	0.439	0.2745	0.191	0.472	0.5546	0.2348	0.2538	0.3152	0.2213	0.3856	0.0948	0.0654	0.3688	0.1906	0.2359	0.5466		0.1912	0.1659
KCNAB2	361	AP	3			0	0.9727	0.9639	0.1953	0.6334	0.7525	0.545	0.9028	0.8374	0.9462	0.6744	0.6483	0.8067	0.798	0.7545	0.8504	0.8156	0.4469	0.7017	0.9013	0.8968	0.6015	0.8984	0.6528	0.8818	0.5341	0.6746	0.7259	0.4016	0.4128	0.7652	0.6515	0.6848	0.7787	0.5207	0.8697	0.9279	0.6312	0.775	0.6239	0.4534		0.7652	0.8341
KCNAB2	362	AP	7			0	0.9727	0.1169	0.0145	0	0	0	0.0174	0.0113	0.0045	0.0415	0	0.0357	0	0	0.0069	0	0.0412	0	0	0	0	0	0.0226	0.0098	0.0269	0.0156	0	0	0.0327	0	0	0	0	0	0.0132	0.0067	0	0.0343	0.0157	0		0	0
KCNAB2	363	AP	4			0	0.9727	0.1439	0.0103	0	0	0	0	0	0.005	0	0	0	0	0.0107	0.0115	0	0	0	0	0	0	0	0	0	0	0	0	0	0	0	0	0	0	0	0.0073	0	0	0	0.0173	0		0.0085	0
KCNAB2	364	AP	1			0	0.9727	0.5298	0.0457	0	0	0	0	0.0257	0	0.0944	0	0	0	0	0	0	0	0.0239	0.0048	0.0093	0.0842	0	0	0	0	0.0354	0.0831	0.1264	0	0	0.0947	0	0	0.0937	0.015	0	0	0	0.1071	0		0.035	0
KCNAB2	367	RI	22.2	22.1	22.3	0	0.9927	0.6574	0.1088	0.5035	0.1027	0.0567	0.1516	0.1819	0.1419	0.212	0.1215	0.1141	0.1265	0.231	0.192	0.1898	0.1785	0.0522	0.1618	0.2075	0.1937	0.1752	0.1125	0.3116	0.2812	0.2371	0.186	0.2363	0.3771	0.2951	0.2549	0.0861	0.4523	0.143	0.1453	0.1256	0.2246	0.1842	0.1009	0.2442	0.3669	0.2169	0.4238
KCNAB2	368	ES	16	15	17	0	0.9218	0.1088	0.0199	0	0.0268	0.0375	0.0205	0.0152	0		0	0.0142	0	0.0163	0	0	0.0422	0	0.0105	0.0133	0	0	0	0.0209	0	0	0.0567	0	0	0.0197	0.0552	0	0	0.0231	0	0.0313	0	0	0.0203	0	0.1074	0	0
KCNAB2	370	ES	13:14:15:17:18:19:21:22.1:22.2:22.3	12	22.4	0	0.9364	0.8031	0.0651	1	1	1	0.9316	1	1	1	1	1	1	1	1	1	1	1	1	1	1	1	1	1	1	1	1	1	1	1	1	1	1	1	1	1	1	0.8869	1	1	1	1	1
KCNAB2	372	ES	13:14:15:17:18:19:21:22.1:22.3	12	22.4	0	1	0.0522	0.0045	1	1	1	0.9926	1	1	1	1	1	1	1	1	1	1	1	1	1	1	1	1	1	1	1	1	1	1	1	1	1	1	1	1	1	1	0.9844	1	1	1	1	1
KCNAB2	374	ES	6	5	9	0	0.9073	0.9118	0.133		0.3367	0.5752	0.362	0.3449	0.3531		0.2973	0.5909	0.5423	0.4037	0.4323	0.2381	0.2529	0.4887	0.3486	0.3222	0.3607	0.3765	0.1841	0.4037	0.7596	0.3882	0.4037	0.4037	0.4037	0.3367	0.3328	0.4944	0.2025	0.4696	0.4583	0.393	0.2973	0.3631	0.4037	0.2733		0.3529	0.4037
RPL22	377	AP	3.1			0	1	0	0	0	0	0	0	0	0	0	0	0	0	0	0	0	0	0	0	0	0	0	0	0	0	0	0	0	0	0	0	0	0	0	0	0	0	0	0	0	0	0	0
RPL22	378	AP	1			0	1	0.0984	0.0048	0.0011	0.0015	0.0031	0.0018	0.0011	0.0011	0.0014	0.0016	0.0023	0.003	0.0069	0.0014	0.0019	0.0025	0.0024	0.0007	0.0013	0.0014	0.003	0.0109	0.0026	0.0009	0.0029	0.0042	0.003	0.0006	0.003	0.0013	0.0014	0.004	0.0009	0.001	0.0032	0.0005	0.003	0.0022	0.0057	0.0013	0.001	0.0014
RPL22	379	AP	2			0	1	0.0984	0.0048	0.9989	0.9985	0.9969	0.9982	0.9989	0.9989	0.9986	0.9984	0.9977	0.997	0.9931	0.9986	0.9981	0.9975	0.9976	0.9993	0.9987	0.9986	0.997	0.9891	0.9974	0.9991	0.9971	0.9958	0.997	0.9994	0.997	0.9987	0.9986	0.996	0.9991	0.999	0.9968	0.9995	0.997	0.9978	0.9943	0.9987	0.999	0.9986
RPL22	380	AT	6			0	1	0.0022	0.0002	0	0	0.0009	0	0	0	0	0	0.0005	0	0	0	0	0	0.0002	0.0002	0	0.0003	0	0	0	0	0.0003	0	0	0	0	0	0	0	0	0	0	0	0	0.0003	0	0	0	0.0003
RPL22	381	AT	5			0	1	0.0022	0.0002	1	1	0.9991	1	1	1	1	1	0.9995	1	1	1	1	1	0.9998	0.9998	1	0.9997	1	1	1	1	0.9997	1	1	1	1	1	1	1	1	1	1	1	1	0.9997	1	1	1	0.9997
RNF207	382	ES	11:12:00	10	13	0	0.8309	0.2868	0.0413	1	1	1	1	1	1	1	1	0.9756	1	1	1	1	1	1	1	1	1	1	1	1	0.9585	1	1	1		1	1	1	1	1	1	1	0.7987	1	1		1	1	1
ICMT	385	ES	03:04:00	2	5	0	0.9982	0.7119	0.1104	0.7327	0.5913	0.7822	0.8874	0.8116	0.7341	0.8654	0.8874	0.6156	0.9169	0.6039	0.8719	0.708	0.7126	0.6201	0.8005	0.8216	0.897	0.7374	0.8559	0.5623	0.8049	0.8883	0.7893	0.8974	0.5652	0.7911	0.6941	0.8614	0.8129	0.5455	0.7881	0.9233	0.5945	0.7837	0.732	0.6441	0.8374	0.9086	0.8349
ICMT	386	ES	4	2	5	0	1	0.2164	0.0342	0.9406	0.8856	0.9699	0.9474	0.8952	0.9457	0.947	0.9705	0.9099	0.9632	0.8865	0.9754	0.9459	0.9359	0.8599	0.9491	0.9546	0.9692	0.9379	0.9294	0.8613	0.9765	0.9481	0.9348	0.9568	0.9377	0.9525	0.9111	0.9368	0.9418	0.878	0.9312	0.9643	0.952	0.961	0.9415	0.8661	0.9628	0.9705	0.9651
ICMT	387	ES	3	2	4	0	1	0.4512	0.0712	0.1712	0.1724	0.1137	0.3356	0.3801	0.1583	0.3011	0.2152	0.1587	0.3378	0.1944	0.1717	0.1455	0.1659	0.2342	0.1971	0.2025	0.2478	0.1853	0.3478	0.1868	0.1091	0.3285	0.2324	0.3184	0.0888	0.1841	0.205	0.3288	0.2359	0.1645	0.2413	0.3513	0.0854	0.1486	0.1691	0.2515	0.1883	0.2653	0.1746
ACOT7	388	AP	3			0	1	0.1726	0.0199	0	0	0	0	0	0	0	0	0	0	0.0186	0.0283	0	0.0184	0.0086	0.0235	0	0.0056	0	0.0128	0.0335	0	0	0	0	0	0.0132	0	0.0269	0	0.0058	0	0	0	0	0	0.0046	0	0.0376	0.0265
ACOT7	389	AP	1.1			0	1	0.9135	0.2141	0.8763	0.5048	0.4619	0.6536	0.2272	0.2991	0.8019	0.2318	0.1493	0.4805	0.0988	0.2453	0.5116	0.5801	0.5379	0.3389	0.3794	0.1476	0.7165	0.1744	0.3708	0.2141	0.8887	0.525	0.4592	0.1411	0.5861	0.4237	0.8491	0.3951	0.2868	0.1438	0.3123	0.8051	0.3658	0.7075	0.1763	0.5042	0.5352	0.7684
ACOT7	390	AP	4			0	1	0.8143	0.1572	0.0816	0.4259	0.0432	0.2979	0.0505	0.6748	0.0484	0.0437	0.5439	0.118	0.3009	0.585	0.0756	0.1431	0.0387	0.5552	0.4811	0.0091	0.2398	0.0579	0.1353	0.014	0.0976	0.0872	0.0114	0.0314	0.1625	0.1914	0.0434	0.0785	0.1223	0.0089	0.6419	0.1755	0.2204	0.0167	0.0045	0.0707	0.3521	0.0858
ACOT7	391	AP	2			0	1	0.9461	0.2517	0.0421	0.0693	0.4948	0.0485	0.7223	0.0261	0.1497	0.7244	0.3067	0.4015	0.5817	0.1414	0.4128	0.2583	0.4148	0.0823	0.1395	0.8378	0.0436	0.7549	0.4604	0.772	0.0137	0.3878	0.5294	0.8275	0.2381	0.3849	0.0806	0.5264	0.5851	0.8473	0.0458	0.0194	0.4139	0.2758	0.8147	0.4251	0.0751	0.1194
ACOT7	392	AT	10			0	1	0.2716	0.0371	0.0575	0.0469	0.0948	0.0558	0.0227	0.0464	0.0328	0.1138	0.1172	0.2757	0.0357	0.0415	0.0223	0.0699	0.0412	0.0304	0.0424	0.036	0.0426	0.1288	0.1379	0.0975	0.0508	0.0331	0.1354	0.0369	0.0177	0.0886	0.0256	0.0649	0.0952	0.0607	0.0327	0.0254	0.1209	0.0576	0.0894	0.2036	0.077	0.0315
ACOT7	393	AT	14			0	1	0.2716	0.0371	0.9425	0.9531	0.9052	0.9442	0.9773	0.9536	0.9672	0.8862	0.8828	0.7243	0.9643	0.9585	0.9777	0.9301	0.9588	0.9696	0.9576	0.964	0.9574	0.8712	0.8621	0.9025	0.9492	0.9669	0.8646	0.9631	0.9823	0.9114	0.9744	0.9351	0.9048	0.9393	0.9673	0.9746	0.8791	0.9424	0.9106	0.7964	0.923	0.9685
ACOT7	395	ES	12.1:12.2	11	13	0	1	0.0481	0.0057	0	0.0111	0	0.0025	0.0057	0.0073	0	0	0	0	0.0101	0.0052	0	0	0	0.0221	0.0294	0.0102	0.0014	0.0035	0	0	0	0.0024	0	0.0033	0	0.0058	0.0034	0	0	0	0.0073	0	0.0026	0.0049	0.0033	0	0	0.0028
ACOT7	396	ES	12.2	11	13	0	1	0.0163	0.0016	0	0	0	0.0039	0	0	0	0.0028	0	0	0	0	0	0	0	0	0	0	0.0022	0	0	0	0	0	0	0	0	0	0	0	0	0	0	0	0.0041	0	0.0052	0	0	0.0043
ACOT7	397	ES	1.2:5	1.1	6	0	0.9982	0.0131	0.0006	1	1	1	1	1	1	1	1	1	1	1	1	1	1	1	1	1	1	1	1	1	1	1	1	1	1	1	1	1	1	1	1	1	1	1	1	1	1	1	1
HES2	400	AT	4.3			0	1	0.5385	0.1122	0.8736	0.685	0.7689	0.4741	0.655	0.5008	0.822	0.6777	0.7469	0.7138	0.538	0.6079	0.8664	0.8059	0.9123	0.7328	0.6795	0.8676	0.6525	0.817	0.6624	0.8314	0.5776	0.6734	0.6557	0.778	0.884	0.7916	0.8402	0.8131	0.8517	0.7508	0.5108	0.4466	0.5201	0.805	0.4934	0.7924	0.8219	0.6464
HES2	401	AT	5			0	1	0.5385	0.1122	0.1264	0.315	0.2311	0.5259	0.345	0.4992	0.178	0.3223	0.2531	0.2862	0.462	0.3921	0.1336	0.1941	0.0877	0.2672	0.3205	0.1324	0.3475	0.183	0.3376	0.1686	0.4224	0.3266	0.3444	0.222	0.116	0.2084	0.1598	0.1869	0.1483	0.2492	0.4892	0.5534	0.4799	0.195	0.5066	0.2076	0.1781	0.3536
ESPN	405	AP	1			0	0.76	1	0.2652	0.3299		0.3877		0.4137		0.4515	1	0.2387			0.5852	0.8045	0.564	0.7157	0.7535	0.2816	0.6515	0.2608	0.3944	0.1414	0.6183	0.4137	0.5995	0.3099	0.6432	0.6142	0.6368	0.5512	0.4332		0.8411		0.1904		0.2666	0.6382	0.6791	0.5366	0.3703
ESPN	406	AP	8			0	0.76	1	0.2652	0.6701		0.6123		0.5863		0.5485	0	0.7613			0.4148	0.1955	0.436	0.2843	0.2465	0.7184	0.3485	0.7392	0.6056	0.8586	0.3817	0.5863	0.4005	0.6901	0.3568	0.3858	0.3632	0.4488	0.5668		0.1589		0.8096		0.7334	0.3618	0.3209	0.4634	0.6297
TNFRSF25	409	RI	6.4	6.3	6.5	0	0.96	0.2161	0.0152	1	1	0.9807	1	1	1	1	1	0.975	1	1	1	0.9141	1	1	1	1	1	1	1	1	1	1	1	1	1	1	1	1	1	1	0.9873	1	1	1	1	1	1	1	1
TNFRSF25	410	RI	6.3:6.4	6.2	6.5	0	0.9709	0.8083	0.1325	0.8011	0.6995	0.5221	0.6263	0.564	0.7097	0.5356	0.6471	0.7129	0.6103	0.7596	0.8748	0.7664	0.5491	0.7692	0.8634	0.7918	0.767	0.7673	0.6257	0.4671	0.8038	0.8044	0.8732	0.8436	0.9	0.806	0.7607	0.7246	0.7089	0.7434	0.6944	0.871	0.9129	0.8118	0.6724	0.9365	0.771	0.7548	0.7442
TNFRSF25	412	ES	6.3:6.4:6.5:7.1	6.2	7.2	0	0.9745	0.4911	0.0332	1	1	0.9777	1	1	1	0.98	1	1	1	0.9844	1	0.9626	1	1	1	0.9588	1	1	1	1	1	0.9856	1	1	1	1	1	1	1	1	1	1	1	1	0.9808	1	1	1	1
TNFRSF25	414	ES	6.5:7.1	6.2	7.2	0	0.8382	0.2892	0.0494	1		0.9769	1	1	1	0.979	1	1	1	0.9531		0.8959	1	1	1	0.8626	1	1	1	1	1	0.947	1	1	1	1	1	1	1	1	1		1	1	0.9626		1	1	1
TNFRSF25	415	ES	6.1:6.2:6.3:6.4:6.5:7.1	5	7.2	0	0.8891	0.4851	0.0715	0.9677	1	0.7942	0.8161	1		1	1	1	0.7331	1	1	1		1	1	1	1	1	1	0.9122	0.9695	1	0.9722	1	1	1	1	1	1	1	1	1	0.9561	0.9389	1	1	1	0.9455	0.9703
TNFRSF25	416	ES	6.2:6.3:6.4:6.5:7.1	5	7.2	0	0.9473	0.4308	0.0463	0.9694	1	0.908	0.7058	1	1	1	1	1	0.8366	1	1	1	1	1	1	1	1	1	1	0.9666	0.9316	1	0.9759	1	1	1	1	1	1	1	1	1	0.9487	0.9167	1	1	1	0.9566	0.9639
TNFRSF25	420	ES	6.2:6.5:7.1	5	7.2	0	0.7855	0.4981	0.0812	0.9054		0.9177		1	1	1	1	1	0.8248	1		1	1	1	1	1	1	1	1	0.9786	0.7892	1	0.8672	1	1	1	1	1	1	1	1		0.7075	0.755	1		1	0.8985	0.9168
TNFRSF25	424	AA	6.1	5	6.2	0	0.8818	1	0.1609	0.5101		0.2947		0.2425	0.2136	0.2101	0.449	0.3659	0.3607	0.4928	0.5046	0.4331	0.1196	0.46	0.55		0.6021	0.6197	0.2832	0.2733	0.7192	0.5144	0.4873	0.3446	0.4385	0.2213	0.5182	0.3487	0.382	0.4	0.3641	0.234	0.559	0.6021	0.4255	0.5284	0.42	0.4661	0.5659
TNFRSF25	425	AA	6.1:6.2:6.3:6.4	5	6.5	0	0.8818	0.8134	0.1303	0.8408	0.5603	0.8228	0.8284	0.7251		0.9138	0.8147	1	0.7507	0.9298	1	0.8254		0.9656	0.9595	0.8363	0.9218	0.7854	0.7779	0.7945	0.9501	0.8762	0.976	1	0.9198	0.932	0.8802	0.9554	0.9227	0.8368	0.9002	0.7698	1	0.9483	0.8787	0.8397	0.8986	1	1
TNFRSF25	426	AA	6.2:6.3:6.4	5	6.5	0	0.94	0.4682	0.0801	0.8479	0.5318	0.9221	0.7215	0.8948	1	0.9765	0.8525	1	0.8478	0.9357	1	0.8658	0.9385	0.9724	0.9536	0.8431	0.8956	0.7048	0.9032	0.9148	0.8902	0.877	0.9792	1	0.9402	0.9803	0.8782	0.9769	0.9535	0.8904	0.9435	0.92	1	0.9288	0.9133	0.8352	0.9282	1	1
TNFRSF25	431	ES	5:6.1:6.2:6.3:6.4:6.5:7.1:7.2	4	8	0	0.8727	0.1949	0.0134	1	1	1	1	1		1	1	1	1	1	1	1		1	1	1	1	1	1	1	1	1	1	1	1	1	1	1	1	1	1	1	1	1	1	1	1	1	1
TNFRSF25	432	ES	5:6.2:6.3:6.4:6.5:7.1:7.2	4	8	0	0.9618	0.1022	0.0057	1	1	1	1	1	1	1	1	1	1	1	1	1	1	1	1	1	1	1	1	1	1	1	1	1	1	1	1	1	1	1	1	1	1	1	1	1	1	1	1
TNFRSF25	436	ES	5:6.2:6.5:7.1:7.2	4	8	0	0.8964	0.1815	0.0093	1		1	1	1	1	1	1	1	1	1		1	1	1	1	1	1	1	1	1	1	1	1	1	1	1	1	1	1	1	1	1	1	1	1		1	1	1
TNFRSF25	441	ES	3:4:5:6.1:6.2:6.3:6.4:6.5:7.1	2	7.2	0	0.82	0.6549	0.0625	0.9106	1	1	1	1		0.759	1	1	1	1		1		1	1	1	1	1	1	1	1	1	1	1	1	1	1	1	1	1	1	1	1	1	1	1	1	1	0.9421
TNFRSF25	443	ES	3:4:5:6.2:6.3:6.4:6.5:7.1	2	7.2	0	0.9636	0.3664	0.0217	0.9727	1	1	1	1	1	0.973	1	1	1	1	1	1	1	1	1	1	1	1	1	1	1	1	1	1	1	1	1	1	1	1	1	1	1	1	1	1	1	1	0.9689
TNFRSF25	451	ES	3:4:5:6.2:6.5:7.1	2	7.2	0	0.94	0.4621	0.0424	0.9261		1	1	1	1	0.9753	1	1	1	1	1	1	1	1	1	1	1	1	1	1	1	1	1	1	1	1	1	1	1	1	1	1	1	1	1	1	1	1	0.9332
TNFRSF25	461	ES	3	2	4	0	0.9891	0.1595	0.0186	1	1	0.9625	1	1	1	0.9859	1	0.9866	1	0.9853	1	0.9726	1	1	1	1	1	0.9769	0.9806	1	1	1	1	0.9567	0.9742	1	0.9829	0.9822	0.9851	1	1	1	1	0.9793	1	1	1	1	1
PLEKHG5	462	AP	1			0	0.8909	0.868	0.1378	0	0	0.0698	0	0		0	0.0153	0.7599	0	0.3477	0	0.0971	0	0.003	0.0594	0	0.0086	0	0	0.0282	0.0159	0	0.4478	0	0	0.0361	0	0.0065	0.0535	0	0	0	0	0.3901	0.3681	0	0	0	0
PLEKHG5	463	AP	3			0	0.8909	0.1831	0.0248	0.0329	0	0	0	0		0	0.0278	0	0	0.02	0	0.0588	0	0	0	0	0.0311	0	0	0.0114	0	0	0.0211	0	0	0.0119	0	0.0119	0.0417	0.0102	0.0529	0	0	0	0	0.0331	0	0	0
PLEKHG5	464	AP	5			0	0.8909	0.5645	0.107	0.0277	0	0	0	0		0.1133	0.3746	0	0.2258	0.0338	0	0.1485	0.1269	0.1268	0	0	0	0.2406	0.2556	0.096	0.0973	0.083	0.0356	0	0.0271	0.1809	0.1121	0.0601	0.1404	0	0.1783	0	0	0	0.041	0.2232	0.0688	0.0322	0
PLEKHG5	465	AP	8			0	0.8909	1	0.2044	0.1418	0.7458	0.3338	0.9165	0.0557		0.1288	0.0266	0.0499	0.2054	0	0.5175	0.1689	0.2164	0.0103	0.5681	0.8444	0.1042	0.2344	0.1453	0.2619	0.0553	0	0.1214	0.3278	0.0617	0.1714	0.17	0.0455	0.1197	0.0196	0.0811	0.5102	0.1672	0.2056	0.2561	0.0952	0.0391	0.0916	0.1364
PLEKHG5	466	AP	4.1			0	0.8909	0.5592	0.0879	0.035	0.1184	0.236	0	0.0619		0.0179	0.0887	0.0277	0.0856	0.128	0	0.0625	0	0.0343	0.1148	0.0375	0.0331	0	0.2018	0.0485	0	0.1048	0.045	0.0331	0.0686	0.127	0.0708	0.038	0.1034	0.0218	0.2365	0.243	0.1858	0	0.0517	0.0352	0	0	0.0909
PLEKHG5	467	AP	6			0	0.8909	1	0.2214	0.5405	0	0	0	0.8824		0.5097	0.3371	0.1141	0.3252	0.4459	0.1092	0.3268	0.3046	0.8257	0	0.0357	0.676	0.2887	0.3067	0.3917	0.4085	0.6473	0.2562	0.5348	0.7492	0.3015	0.3812	0.7691	0.3931	0.5484	0.3102	0.1539	0.6471	0.2822	0.1966	0.5358	0.7014	0.8121	0.5759
PLEKHG5	468	AP	7			0	0.8909	0.671	0.1035	0.202	0	0.283	0	0		0.1688	0.062	0.0485	0.0598	0	0.2413	0.0656	0.1682	0	0.0602	0.0394	0.0521	0.1366	0.0212	0.0509	0	0.1649	0.0472	0.1042	0.054	0.04	0.1981	0.0398	0.0465	0.3999	0.0118	0	0	0.0959	0.0271	0.037	0.0911	0.0641	0.1272
PLEKHG5	469	AP	2			0	0.8909	0.423	0.0618	0.0201	0.1359	0.0774	0.0835	0		0.0616	0.0679	0	0.0982	0.0245	0.132	0.0718	0.184	0	0.1976	0.0431	0.095	0.0996	0.0695	0.1113	0.423	0	0.0258	0	0.0394	0.1311	0.0677	0.029	0.1018	0	0.1292	0.0929	0	0.0262	0.0594	0.0405	0.0997	0	0.0696
PLEKHG5	472	RI	27.2	27.1	27.3	0	0.9982	0.0855	0.0135	0.9926	1	1	0.9788	1	1	1	0.9921	0.9866	1	1	1	1	0.9534	0.9952	0.9609	0.9714	1	0.9907	0.9916	0.9941	0.9905	0.9902	0.9696	1	0.9854	0.9943	0.9938	0.9952	0.9846	0.98	0.9837	1	1	1	1	1	1	1	1
PLEKHG5	473	AA	27.1:27.2:27.3	26	27.4	0	0.9982	0.2023	0.0139	1	1	1	1	1	1	1	0.9933	1	1	1	1	1	1	0.9959	0.9491	1	1	1	1	0.9889	1	1	0.9912	1	1	1	1	0.9866	1	1	0.982	1	1	1	1	1	0.9806	0.992	1
KLHL21	477	AP	1			0	0.9982	0.1962	0.0113	0.018	0	0	0	0	0	0	0	0	0	0	0	0.0247	0	0	0	0	0	0	0	0	0	0	0	0	0	0.0279	0	0	0	0.0129	0	0	0	0	0	0	0	0	0
KLHL21	478	AP	2			0	0.9982	0.1962	0.0113	0.982	1	1	1	1	1	1	1	1	1	1	1	0.9753	1	1	1	1	1	1	1	1	1	1	1	1	1	0.9721	1	1	1	0.9871	1	1	1	1	1	1	1	1	1
KLHL21	481	RI	4.2	4.1	4.3	0	1	0.4389	0.0724	1	0.8987	0.9399	0.8943	0.9375	1	1	1	1	1	0.9479	0.9054	0.9451	1	0.8982	0.8104	0.8381	0.9623	1	1	0.9659	0.963	0.9666	1	0.9506	0.9247	0.9196	0.9321	1	0.8921	0.8206	0.9374	1	1	0.9497	0.8966	1	0.9157	0.9105	1
KLHL21	482	RI	4.2:4.3	4.1	4.4	0	1	0.6959	0.1183	0.277	0.2723	0.188	0.2698	0.2991	0.2356	0.1948	0.3317	0.2232	0.2072	0.2457	0.3851	0.2826	0.2098	0.1369	0.1651	0.2728	0.2134	0.3395	0.2888	0.3233	0.2789	0.331	0.4089	0.3657	0.3457	0.3815	0.3209	0.1493	0.2765	0.179	0.2257	0.2448	0.2854	0.3025	0.1549	0.2172	0.307	0.2615	0.4992
KLHL21	483	AA	4.3	4.1	4.4	0	0.9945	0.1812	0.0183	0	0.0373	0.0083	0.0291	0.0251	0	0	0	0	0	0.0122	0.0585	0.0198	0	0.0211	0.0303	0.0467	0.0088	0	0	0.0095	0.0132	0.0155	0	0.0258	0.0399	0.0473	0.0215	0	0.0406	0.0352	0.0169	0	0	0.0171	0.0156	0	0.0248	0.023	0
THAP3	486	AT	7			0	1	0.456	0.0652	0.311	0.4183	0.3431	0.326	0.3931	0.4128	0.401	0.3583	0.3264	0.3197	0.3485	0.3546	0.469	0.3893	0.378	0.3769	0.3323	0.399	0.3417	0.399	0.4415	0.3903	0.5047	0.4204	0.4836	0.3519	0.4554	0.4437	0.4015	0.4038	0.3659	0.3459	0.2917	0.3326	0.3826	0.3514	0.3923	0.3654	0.3261	0.4408
THAP3	487	AT	6			0	1	0.456	0.0652	0.689	0.5817	0.6569	0.674	0.6069	0.5872	0.599	0.6417	0.6736	0.6803	0.6515	0.6454	0.531	0.6107	0.622	0.6231	0.6677	0.601	0.6583	0.601	0.5585	0.6097	0.4953	0.5796	0.5164	0.6481	0.5446	0.5563	0.5985	0.5962	0.6341	0.6541	0.7083	0.6674	0.6174	0.6486	0.6077	0.6346	0.6739	0.5592
THAP3	488	AA	5.1	4.2	5.2	0	0.9964	0.212	0.028	0.0307	0.0684	0.0239	0.0165	0.037	0	0.0883	0.0545	0.0447	0	0	0.0362	0.0354	0	0.0086	0.0184	0.0325	0	0.0527	0.0466	0.0883	0.0189	0	0.0325	0	0	0.0301	0	0.0607	0	0.0189	0	0.0301	0.0415	0.0246	0.0123	0	0	0.0271	0.0172
THAP3	489	AA	4.1	3	4.2	0	0.9982	0.4699	0.0633	0.9297	0.8286	0.928	0.9207	0.8457	1	0.8227	0.8802	0.9407	0.8457	0.8033	0.757	0.8212	0.8811	0.9023	0.8221	0.8713	1	0.8476	0.858	0.8476	0.7231	0.909	0.8376	0.8886	0.7875	0.8131	1	0.8934	0.8915	0.9226	0.8131	0.7505	0.8131	0.9742	0.7946	0.8056	0.8376	0.888	0.8994
DNAJC11	491	AP	2			0	1	0.0316	0.0026	0	0	0	0	0	0	0	0	0	0	0	0	0	0	0	0	0	0	0	0	0	0	0	0	0	0	0	0	0	0	0	0	0	0	0	0	0	0	0	0
DNAJC11	492	AP	1			0	1	0.0316	0.0026	1	1	1	1	1	1	1	1	1	1	1	1	1	1	1	1	1	1	1	1	1	1	1	1	1	1	1	1	1	1	1	1	1	1	1	1	1	1	1	1
DNAJC11	495	ES	12	11	13	0	1	0.131	0.0117	0.9695	0.9884	1	0.989	0.9761	0.9742	0.9873	0.9929	1	0.9733	0.975	1	0.9902	0.987	0.9961	1	0.9883	0.9802	0.9622	1	0.9898	0.994	0.9892	0.9642	0.9923	0.9801	0.9916	0.9625	0.9942	0.9929	0.9893	0.9765	0.9443	1	0.9901	0.9898	0.9789	1	1	0.9834
DNAJC11	496	ES	9.2:10:11:12:13:14:15:16:17.1	9.1	17.2	0	1	0.0562	0.0089	0.9899	1	0.9879	1	1	0.9877	1	0.9927	0.9951	0.9849	0.992	0.9857	0.9731	1	0.9962	0.9659	1	0.9939	0.9931	0.9849	1	0.9829	0.9908	0.9829	0.9806	0.9949	0.9916	0.9918	0.9902	1	0.9897	0.9776	1	0.9864	1	0.9898	0.9932	1	0.9874	0.995
DNAJC11	497	ES	9.2:10:11:13:14:15:16:17.1	9.1	17.2	0	0.7836	0.804	0.2111	0.823	1		1	1	0.8065	1	0.6272		0.728	0.837		0.3886	1	0.6239		1	0.8365	0.888		1	0.3728	0.6589	0.7959	0.4129	0.8787	0.6044	0.8816	0.5356	1	0.6358	0.6497	1		1	0.601	0.8453			0.8539
DNAJC11	498	ES	4	3	5	0	1	0.0756	0.0096	0.9926	0.9819	1	0.9845	1	1	1	0.99	0.9907	1	0.9889	1	0.969	0.9892	0.9934	1	0.9648	1	1	0.9869	1	1	1	0.9868	1	0.9832	0.9844	1	0.9762	0.978	0.993	0.9868	1	0.9778	1	0.9931	1	1	1	1
CAMTA1	501	AT	26			0	1	0.2821	0.0331	0.0139	0.1491	0.0857	0.1052	0.0121	0.0817	0.0112	0.0114	0.0442	0.0132	0.0607	0.0836	0.0176	0.0077	0.0313	0.1002	0.0979	0.0926	0.0511	0.0495	0.0884	0.0212	0.0125	0.0113	0.0158	0.0078	0.0315	0.0096	0.0153	0.0102	0.0348	0.0426	0.0494	0.0119	0.0763	0.049	0.0307	0.0053	0.0203	0.0165
CAMTA1	502	AT	5			0	1	0.4016	0.0633	0.8535	0.6788	0.7159	0.6839	0.7136	0.7476	0.8644	0.7183	0.5112	0.8151	0.7417	0.7376	0.7756	0.7355	0.7432	0.7465	0.7444	0.7359	0.8367	0.6717	0.7073	0.7476	0.8134	0.7975	0.7128	0.8421	0.7757	0.8265	0.6873	0.8056	0.7648	0.6676	0.8041	0.7019	0.7033	0.7048	0.8984	0.7879	0.8109	0.8705
CAMTA1	503	AT	6			0	1	0.3793	0.0561	0.1326	0.1721	0.1983	0.2109	0.2743	0.1708	0.1244	0.2703	0.4446	0.1717	0.1976	0.1788	0.2068	0.2568	0.2255	0.1533	0.1577	0.1714	0.1122	0.2788	0.2042	0.2313	0.1741	0.1912	0.2714	0.1501	0.1928	0.1639	0.2974	0.1842	0.2004	0.2899	0.1465	0.2862	0.2205	0.2461	0.0709	0.2069	0.1688	0.1131
CAMTA1	506	ME	2|3	1	4	0	1	0.0457	0.0076	0.0037	0	0.0104	0	0.0125	0.0103	0	0.0082	0.0033	0.0088	0.0053	0	0.0097	0.0154	0.003	0.0165	0.0141	0	0.0041	0	0.0017	0.0076	0.0291	0.0303	0.0159	0.0154	0.0108	0	0.0174	0.013	0.0028	0	0	0	0.0278	0.005	0.0115	0.0102	0	0.006
CAMTA1	507	ES	3	1	4	1	1	0.2995	0.0498	0.8279	0.8515	0.7217	0.8122	0.8397	0.8323	0.9236	0.7865	0.7913	0.8885	0.8294	0.8762	0.8145	0.7498	0.9314	0.8356	0.7469	0.9232	0.7627	0.8558	0.7918	0.8046	0.7608	0.705	0.8572	0.7732	0.8655	0.9029	0.8762	0.7878	0.8676	0.8592	0.8817	0.8056	0.841	0.8305	0.7964	0.8624	0.8597	0.8278
CAMTA1	508	ES	2	1	4	1	0.9982	0.2663	0.0358	0.0177	0	0.0266	0	0.0621	0.049	0	0.0296	0.0126	0.0662	0.0253	0	0.0414	0.0448	0.0389	0.0786	0.0404	0	0.0129	0	0.0064	0.0307	0.087	0.0695	0.0886	0.0505	0.0659	0	0.1112	0.0466	0.0181	0	0	0	0.1313	0.0239	0.0434	0.0609	0	0.0283
VAMP3	509	AP	1			0	1	0.4414	0.0731	0.6857	0.8842	0.7831	0.8521	0.8388	0.8608	0.8557	0.5201	0.8334	0.8336	0.8709	0.8134	0.8034	0.8522	0.8336	0.888	0.8713	0.8772	0.7826	0.8057	0.7337	0.7123	0.7649	0.7621	0.8415	0.7951	0.8144	0.8035	0.836	0.6829	0.7145	0.7883	0.8469	0.8136	0.7935	0.683	0.8562	0.8534	0.8164	0.8348
VAMP3	510	AP	2			0	1	0.4414	0.0731	0.3143	0.1158	0.2169	0.1479	0.1612	0.1392	0.1443	0.4799	0.1666	0.1664	0.1291	0.1866	0.1966	0.1478	0.1664	0.112	0.1287	0.1228	0.2174	0.1943	0.2663	0.2877	0.2351	0.2379	0.1585	0.2049	0.1856	0.1965	0.164	0.3171	0.2855	0.2117	0.1531	0.1864	0.2065	0.317	0.1438	0.1466	0.1836	0.1652
PER3	513	AT	10.2			0	1	0.1458	0.0167	0.0212	0.0091	0.0242	0.0097	0	0	0	0	0	0	0.011	0.0171	0	0	0.003	0	0	0.0165	0.0164	0.0161	0.0074	0.0086	0.0056	0	0	0.0156	0.0105	0.0276	0	0.0418	0	0.0295	0	0	0	0.0257	0	0	0	0
PER3	514	AT	22			0	1	0.1458	0.0167	0.9788	0.9909	0.9758	0.9903	1	1	1	1	1	1	0.989	0.9829	1	1	0.997	1	1	0.9835	0.9836	0.9839	0.9926	0.9914	0.9944	1	1	0.9844	0.9895	0.9724	1	0.9582	1	0.9705	1	1	1	0.9743	1	1	1	1
PER3	515	AA	19.1	18	19.2	0	0.7509	0.7741	0.1299	0.4853	0.4266	0.4318	0.5449		0.7437	0.6007		0.6803		0.5966		0.4204	0.5801	0.6506	0.4112	0.6286	0.4629	0.4156	0.4433	0.6111	0.3589	0.5693	0.4916	0.4916	0.6592	0.5856	0.7668		0.5101	0.4532	0.7719	0.4362	0.7074	0.3993	0.5101			0.6286
UTS2	520	AT	5.2			0	0.8782	0.8391	0.1754		0	0.3096		0.6201	0.3165	0.4245	0	0.1439	0.3892	0.3393		0.2369	0	0.2981	0.4593	0.1612		0.2369	0.3657	0	0	0.2684	0.3892	0	0	0.2237	0.5022	0	0.5022	0.4466		0.2981	0.1918	0.5355		0		0.3096	0
UTS2	521	AT	7			0	0.8782	0.8391	0.1754		1	0.6904		0.3799	0.6835	0.5755	1	0.8561	0.6108	0.6607		0.7631	1	0.7019	0.5407	0.8388		0.7631	0.6343	1	1	0.7316	0.6108	1	1	0.7763	0.4978	1	0.4978	0.5534		0.7019	0.8082	0.4645		1		0.6904	1
PARK7	523	AP	1.1			0	1	0.0279	0.0044	0.9974	0.998	0.9913	0.9941	0.9975	0.9861	0.9973	0.9965	0.9972	1	0.9917	0.9919	0.9949	0.992	0.9968	0.995	0.9937	1	0.9956	0.9943	0.9969	0.989	0.9883	0.9927	1	0.9895	1	0.9963	0.9978	0.9912	0.9955	0.9985	1	0.9959	0.9929	0.9929	0.991	1	0.9905	0.9951
PARK7	524	AP	2.1			0	1	0.0279	0.0044	0.0026	0.002	0.0087	0.0059	0.0025	0.0139	0.0027	0.0035	0.0028	0	0.0083	0.0081	0.0051	0.008	0.0032	0.005	0.0063	0	0.0044	0.0057	0.0031	0.011	0.0117	0.0073	0	0.0105	0	0.0037	0.0022	0.0088	0.0045	0.0015	0	0.0041	0.0071	0.0071	0.009	0	0.0095	0.0049
PARK7	526	ES	5	4	6	0	1	0.0081	0.0014	0.9994	0.9989	0.9991	1	0.9993	1	0.9993	0.9992	0.9978	1	0.9968	1	0.9973	1	0.9986	0.9994	1	1	1	1	0.998	0.9992	0.9988	0.9989	0.9963	0.9963	0.9993	0.9975	0.9966	0.999	0.9977	0.9993	0.9976	0.9977	0.9984	0.9977	1	1	0.9984	0.9989
PARK7	528	AD	1.2	1.1	3	0	1	0.5057	0.0882	0.5857	0.5586	0.4429	0.524	0.5368	0.6183	0.447	0.5842	0.7015	0.6716	0.5033	0.5406	0.4172	0.5386	0.5094	0.666	0.6473	0.6719	0.4776	0.5794	0.4011	0.6061	0.4162	0.5146	0.6035	0.3313	0.4458	0.3535	0.3555	0.5738	0.5759	0.4894	0.5665	0.5266	0.5276	0.6158	0.7135	0.596	0.5139	0.4887
ERRFI1	531	AT	3.4			0	1	0.0957	0.0105	0.968	0.9919	0.9838	0.9955	0.9972	0.9888	0.9798	0.988	0.9376	0.9954	0.9953	0.9985	0.9923	0.9764	0.9938	0.9952	0.9936	0.9949	0.992	0.9842	0.9913	0.9908	0.9771	0.9445	0.9622	0.9953	0.9935	0.9929	0.9877	0.9559	0.9902	0.9878	0.9882	0.9826	0.9937	0.984	0.9955	0.9643	0.9953	0.9684
ERRFI1	532	AT	4			0	1	0.0957	0.0105	0.032	0.0081	0.0162	0.0045	0.0028	0.0112	0.0202	0.012	0.0624	0.0046	0.0047	0.0015	0.0077	0.0236	0.0062	0.0048	0.0064	0.0051	0.008	0.0158	0.0087	0.0092	0.0229	0.0555	0.0378	0.0047	0.0065	0.0071	0.0123	0.0441	0.0098	0.0122	0.0118	0.0174	0.0063	0.016	0.0045	0.0357	0.0047	0.0316
ERRFI1	533	RI	3.3	3.2	3.4	0	1	0.8699	0.1579	0.5217	0.15	0.275	0.3116	0.1832	0.1649	0.3996	0.3538	0.5104	0.343	0.2972	0.4249	0.4175	0.0781	0.2626	0.2424	0.2276	0.5177	0.235	0.249	0.4119	0.5686	0.3656	0.4805	0.4406	0.396	0.5643	0.3917	0.3571	0.3033	0.3431	0.4508	0.2173	0.3388	0.3621	0.3252	0.2642	0.3895	0.4395	0.5803
ERRFI1	534	AA	3.1:3.2:3.3	2	3.4	0	0.9109	0.9078	0.2723	0.7559	0.3779	0.5314	0.6212	0.8867	0.8041	0.5886	1	1	0.2648	0.5236	0.9229	0.8672		0.5384	0.6725	0.5281	1	0.4215	0.7819	0.851	0.5707	0.8452	1	1	0.4781	0.7041	1	0.589	0.5912	0.5217	0.7651	0.2812	0.4348	0.7108	0.7329			1	0.9428
ERRFI1	535	AA	3.2:3.3	2	3.4	0	0.9964	0.6708	0.0925	0.9572	0.8969	0.9269	0.9377	0.9875	0.979	0.8936	1	1	0.6904	0.911	0.9709	0.9674	1	0.9087	0.9485	0.9097	1	0.834	0.9347	0.974	0.9161	0.9716	1	1	0.8584	0.9528	1	0.9375	0.8492	0.907	0.9795	0.8992	0.8251	0.951	0.9476	0.817	1	1	0.9833
ERRFI1	536	ES	3.1:3.2	2	3.4	0	0.8382	0.709	0.135	0.766	0.814	0.7865	0.8096	0.9774	0.9619	0.7287	1		0.472	0.7628	0.9502	0.9287	1	0.8229	0.8947	0.8517	1	0.7762	0.9322	0.9051	0.5443	0.9248		1	0.6443	0.6872	1	0.7696	0.8399	0.7484	0.8405	0.6335		0.8229	0.891			1	0.939
ERRFI1	537	ES	3.2	2	3.4	0	0.9945	0.2473	0.0291	0.9593	0.9841	0.9763	0.9749	0.9977	0.9965	0.94	1	1	0.8459	0.9676	0.9815	0.9833	1	0.9753	0.9869	0.9809	1	0.9595	0.982	0.9842	0.9071	0.9871	1	1	0.9226	0.9487	1	0.9721	0.9529	0.9636	0.9871	0.9751	0.9286	0.9733	0.9817	0.9394	1	1	0.9821
ERRFI1	538	AA	3.1	2	3.2	0	0.9745	0.4053	0.0641	0.1259	0.0682	0.0847	0.1017	0.0932	0.084	0.1522	0.1792	0.1236	0.1447	0.1002	0.2746	0.1888	0.1512	0.109	0.105	0.1034	0.1369	0.129	0.2066	0.1388	0.1133	0.1447	0.1014	0.1947	0.1369	0.1098	0.1388	0.0898	0.2131	0.1052	0.0669	0.0434	0.1447	0.1172	0.1352	0.0449	0.0293	0.1535	0.2274
RERE	541	AP	9			0	0.9891	1	0.1505	0.239	0.1424	0.1861	0.3033	0.4087	0.2242	0.4255	0.3657	0.299	0.1433	0.4296	0.3823	0.1389	0.2232	0.3414	0.5867	0.3936	0.3547	0.2917	0.3176	0.2407	0.4046	0.5502	0.2211	0.1657	0.3118	0.3256	0.4245	0.3726	0.303	0.529	0.229	0.3145	0.5076	0.2843	0.2992	0.3021	0.3189	0.3217	0.3439
RERE	543	AP	14			0	0.9891	0.7471	0.1264	0.193	0.534	0.3613	0.3412	0.2043	0.4892	0.0709	0.2057	0.0641	0.3224	0.1432	0.344	0.4585	0.3827	0.1164	0.1903	0.2797	0.168	0.4967	0.268	0.4126	0.1951	0.0688	0.2764	0.1988	0.1935	0.3756	0.2228	0.263	0.2797	0.0557	0.1717	0.1048	0.1384	0.1535	0.2606	0.2883	0.2734	0.3147	0.3316
RERE	544	AP	1			0	0.9891	0.8901	0.1432	0.568	0.3236	0.4526	0.3555	0.387	0.2866	0.5036	0.4286	0.637	0.5343	0.4272	0.2737	0.4026	0.3941	0.5422	0.223	0.3267	0.4773	0.2116	0.4145	0.3467	0.4003	0.381	0.5025	0.6355	0.4947	0.2988	0.3527	0.3643	0.4172	0.4153	0.5993	0.5807	0.354	0.5622	0.4401	0.4096	0.4077	0.3636	0.3245
RERE	545	ES	18:19:20:21:22:23:24	17	25	0	1	0.0189	0.0011	1	1	1	1	1	1	1	1	1	1	1	1	1	1	1	1	1	1	1	1	1	1	1	1	1	1	1	1	1	1	1	1	1	1	1	1	1	1	1	1
RERE	546	ES	5	4	6	1	0.7709	0.4584	0.0722	0.8593	0.8464	0.8585	0.9071	0.7825	0.8681		0.8111	0.7652	0.8254	0.6447		0.8315	0.8254	0.8736	0.8494	0.8403	0.8555	0.7885		0.8878		0.9145	0.7979		0.7789	0.7835	0.7835	0.8291	0.9005	0.8564	0.9044			0.7937	0.8331	0.8044	0.7387	0.7849
CA6	548	AT	3			0	0.9818	0.9812	0.2514	0.8793	1	0.8762	1	1	1	1	0.5573	1	0.7695	1	1	0.7747	1	0.0292	0.7845	1	0.7012	0.4512	1	1	1	1	0.8094	0.6973	0.607	1	0.6384	1	0.7172	1	0.89	1	1	0.5598	0.659	1	1	1	0.8199
CA6	549	AT	10			0	0.9818	0.9278	0.2286	0.1207	0	0.1238	0	0	0	0	0.4427	0	0.2305	0	0	0.2253	0	0.8621	0.2155	0	0.2988	0.2878	0	0	0	0	0.1906	0.0367	0.393	0	0.3616	0	0.0611	0	0.11	0	0	0.4402	0.341	0	0	0	0.1801
CA6	550	AT	9			0	0.9818	0.5585	0.0651	0	0	0	0	0	0	0	0	0	0	0	0	0	0	0.1087	0	0	0	0.261	0	0	0	0	0	0.266	0	0	0	0	0.2217	0	0	0	0	0	0	0	0	0	0
SLC2A5	552	AP	1			0	0.8218	0.6633	0.0494	1				1		0.9659	1	0.9273	1	1		0.9313	1	1	1			0.9886		1	1	1	1		1	0.954	1	1	0.9461	1	1	1	1	0.9504	1		0.9623	0.9808	0.9371
SLC2A5	553	AP	4			0	0.8218	0.6633	0.0494	0				0		0.0341	0	0.0727	0	0		0.0687	0	0	0			0.0114		0	0	0	0		0	0.046	0	0	0.0539	0	0	0	0	0.0496	0		0.0377	0.0192	0.0629
SLC2A5	556	RI	6.2	6.1	6.3	0	0.8927	0.9971	0.14	0.0377		0.3302		0.0286		0.074	0.1156	0.2017	0.0366	0.1612		0.1087	0.0497	0.0752	0.0322	0.2537	0.3077	0.0397	0.1156	0.0752	0.074	0.1356	0.0911	0.0947	0.32	0.1304	0.1334	0.1509	0.129	0.0769	0.086	0.0695	0.1087	0.1356	0.0752	0.3433	0.086	0.1053	0.2178
SLC2A5	557	ES	02:03:00	1	5	0	0.9509	0.156	0.0142	1		1		1		0.9618	1	1	0.9329	0.9828		1	1	1	1	1	1	1	1	1	1	1	1	1	1	1	1	1	1	1	1	1	1	1	1	1	1	1	1
GPR157	558	ES	3	2	4	0	0.9618	0.6753	0.1328	0.8429	0.6362	0.5611	0.8297	0.8297	0.7954	0.8235	0.535	0.6446	0.7954	0.7839	0.9087	0.7014	0.7954	0.8098	0.7394	0.7706	0.909	0.8341	0.8034	0.5543	0.886	0.5139	0.9372	0.8266	0.6817	0.9256	0.8672	0.7593	0.7067	0.7806	0.7207	0.8615	1	0.7471	0.7886	0.651	0.8057	0.8152	0.7869
SPSB1	561	AP	3.1			0	0.9782	0.348	0.0475	0	0.0329	0	0	0	0.1341	0	0	0.0821	0	0.0526	0	0	0	0	0	0	0.0378	0	0	0.0798	0	0.1137	0	0	0.031	0	0	0	0	0	0	0	0	0	0	0.0907	0	0	0.1267
SPSB1	562	AP	1			0	0.9782	0.4102	0.0597	1	0.9494	1	0.9193	1	0.818	0.9562	0.9536	0.9179	1	0.9098	1	1	0.9785	1	1	1	0.9622	1	0.9522	0.9202	1	0.8863	0.9432	0.9661	0.9137	1	0.9437	0.9766	0.9661	0.9859	1	1	0.9579	0.9193	0.9543	0.8607	1	0.9416	0.8733
SPSB1	563	AP	2			0	0.9782	0.2385	0.0336	0	0.0177	0	0.0807	0	0.0479	0.0438	0.0464	0	0	0.0376	0	0	0.0215	0	0	0	0	0	0.0478	0	0	0	0.0568	0.0339	0.0553	0	0.0563	0.0234	0.0339	0.0141	0	0	0.0421	0.0807	0.0457	0.0486	0	0.0584	0
TMEM201	564	AT	11			0	1	0.6457	0.1166	0.6253	0.3929	0.5775	0.3576	0.7675	0.4534	0.7621	0.7337	0.7208	0.6258	0.5089	0.5208	0.579	0.8549	0.6819	0.4811	0.4922	0.6992	0.6697	0.6871	0.6896	0.7632	0.7564	0.7594	0.8804	0.6422	0.4992	0.713	0.7668	0.6682	0.5135	0.6676	0.5261	0.6849	0.515	0.5765	0.6789	0.7688	0.6612	0.8441
TMEM201	565	AT	6.2			0	1	0.6457	0.1166	0.3747	0.6071	0.4225	0.6424	0.2325	0.5466	0.2379	0.2663	0.2792	0.3742	0.4911	0.4792	0.421	0.1451	0.3181	0.5189	0.5078	0.3008	0.3303	0.3129	0.3104	0.2368	0.2436	0.2406	0.1196	0.3578	0.5008	0.287	0.2332	0.3318	0.4865	0.3324	0.4739	0.3151	0.485	0.4235	0.3211	0.2312	0.3388	0.1559
TMEM201	566	ES	8	7	9	0	0.9836	0.438	0.043	0.9674	1	0.9071		1	1	1	1	1	1	0.9585	0.562	1	1	0.8851	1	1	1	1	0.9594	0.9686	0.9754	0.9203	1	0.9783	0.983	1	0.9757	0.988	1	0.9252	0.9499	0.9203	1	0.9226	0.9616	0.9635	1	1	1
PIK3CD	572	RI	17.2	17.1	17.3	0	0.9218	1	0.1553	0.1279	0.1775	0.0892	0.1292	0.0842	0.0832	0.4174	0.1443	0.4922	0.3916	0.3727	0.0697	0.2346		0.1172	0.1097	0.1105	0.0825	0.1958	0.101	0.2094	0.1969	0.2278	0.1644	0.1941	0.3711	0.1767	0.0866	0.0514	0.3598	0.0777	0.1131	0.1515	0.5742	0.1695	0.1059	0.1633	0.1443	0.1341	0.3101
PIK3CD	574	AA	8.1	7	8.2	0	0.9691	0.2152	0.0306	1	1	1	1	1	1	1	0.9454	1	1	1	1	1	1	0.9736	0.9567	0.955	1	1	1	1	1	1	0.8724	1	0.9093	0.9236	1	1	0.9623	1	1	0.9683	1	0.9823	0.9811	0.958	1	0.9757	1
CLSTN1	575	ES	11	10	12	0	1	0.9225	0.2006	0.6933	0.5558	0.9097	0.4975	0.3716	0.4452	0.17	0.5285	0.2757	0.6278	0.6985	0.3056	0.6622	0.2933	0.2532	0.3336	0.3979	0.144	0.1744	0.5324	0.7914	0.4523	0.3244	0.6567	0.3364	0.1048	0.6078	0.343	0.2099	0.632	0.4554	0.5514	0.337	0.5582	0.495	0.7945	0.1693	0.7161	0.1201	0.3696
CLSTN1	576	ES	3	2	4	0	0.9982	0.5834	0.1045	0.2716	0.4408	0.1738	0.4224	0.17	0.3291	0.0378	0.0799	0.0497	0.146	0.2532	0.1632	0.2058	0.0652	0.0959	0.2556	0.286	0.0997	0.1134	0.0742	0.1609	0.0546	0.1025	0.1626	0.1347	0.0462	0.1481	0.1124	0.0807	0.0724	0.1009	0.1194	0.259	0.1154	0.182	0.2199	0.0136	0.1634	0.069	0.1139
CTNNBIP1	577	AP	1			0	0.9982	1	0.1479	0.6488	0.7303	0.8221	0.6676	0.7277	0.4693	0.5783	0.3213	0.6554	0.5126	0.7165	0.5942	0.545	0.5797	0.9528	0.566	0.7668	0.6852	0.6005	0.6887	0.515	0.9052	0.847	0.8268	0.5713	0.4417	0.7436	0.5634	0.8109	0.618	0.5136	0.6237	0.5161	0.9464	0.529	0.7499	0.7069	0.6101	0.463	0.3551
CTNNBIP1	578	AP	2			0	0.9982	0.7083	0.1331	0.2827	0.1488	0.0663	0.2119	0.2723	0.208	0.29	0.3672	0.1373	0.3652	0.0979	0.2372	0.2559	0.334	0.0472	0.3252	0.2332	0.1321	0.2841	0.2112	0.249	0.0948	0.153	0.1732	0.3795	0.3538	0.2564	0.2552	0.0885	0.2108	0.4078	0.0662	0.1545	0.0536	0.2418	0.2087	0.1111	0.2632	0.2985	0.49
CTNNBIP1	579	AP	6.1			0	0.9982	0.4581	0.0905	0.0684	0.1209	0	0.1205	0	0.3227	0.11	0.174	0.1302	0.1222	0.1856	0.1686	0	0.0863	0	0.1088	0	0.1633	0.1154	0.1001	0.236	0	0	0	0	0.0516	0	0.1814	0.1007	0.1713	0.0494	0.2822	0.3295	0	0.2292	0	0.1404	0	0.0707	0.1548
CTNNBIP1	580	AP	4			0	0.9982	0.4863	0.0725	0	0	0.1116	0	0	0	0.0217	0.1375	0.0771	0	0	0	0.1991	0	0	0	0	0.0194	0	0	0	0	0	0	0.0492	0.1529	0	0	0	0	0.0292	0.0279	0	0	0	0.0414	0.0416	0.1267	0.1677	0
CTNNBIP1	583	RI	8.2	8.1	8.3	0	1	0.1605	0.0241	0.9745	0.9609	0.9541	0.9719	0.9529	0.9843	0.9768	0.9466	0.9269	0.9798	0.9031	0.9096	0.9025	0.9348	0.9655	0.9342	0.9527	0.9685	0.9674	0.9566	0.9277	0.9382	0.9284	0.976	0.9605	0.9676	0.9661	0.9441	0.941	0.9806	0.9707	0.9743	0.9247	0.9659	0.936	0.948	0.9758	0.9507	0.9375	0.9598
CTNNBIP1	584	ES	3	1	5	0	0.9927	0.5227	0.0812	0.0944	0.2728	0.0292	0.1381	0.1603	0.2006	0.2	0.2172	0.166	0.0896	0.2651	0.0706	0.2078	0.1613	0.1515	0.1761	0.1381	0.0789	0.34	0.0934	0.1427	0.1159	0.2742	0.1606	0.3021	0.2437	0.1608	0.1882	0.3247	0.1766	0.1971	0.1965	0.1218	0.3635	0.1938	0.1938	0.1816	0.1761	0.2901	0.2651
LZIC	586	AP	1			0	1	0.6668	0.1175	0.5758	0.6454	0.4499	0.7662	0.3504	0.5482	0.2658	0.2393	0.2124	0.4134	0.4213	0.441	0.4399	0.2137	0.4945	0.6295	0.579	0.382	0.3409	0.3626	0.4064	0.2018	0.3487	0.4242	0.4157	0.4424	0.5576	0.3487	0.4566	0.6342	0.3084	0.4057	0.3635	0.5131	0.3481	0.5226	0.1892	0.3382	0.4376	0.3616
LZIC	587	AP	2			0	1	0.6668	0.1175	0.4242	0.3546	0.5501	0.2338	0.6496	0.4518	0.7342	0.7607	0.7876	0.5866	0.5787	0.559	0.5601	0.7863	0.5055	0.3705	0.421	0.618	0.6591	0.6374	0.5936	0.7982	0.6513	0.5758	0.5843	0.5576	0.4424	0.6513	0.5434	0.3658	0.6916	0.5943	0.6365	0.4869	0.6519	0.4774	0.8108	0.6618	0.5624	0.6384
LZIC	588	AD	3.2	3.1	4	0	1	0.0353	0.0042	0.9949	1	1	1	1	1	0.9925	1	1	1	1	1	1	0.991	0.9951	1	1	1	1	1	1	1	1	1	1	1	0.9852	1	0.9937	1	1	1	1	1	1	1	1	1	0.9904	0.9919
NMNAT1	589	AT	5			0	1	0.5418	0.0847	0.4147	0.4763	0.5374	0.4675	0.3601	0.415	0.3486	0.6283	0.5298	0.4735	0.3527	0.4015	0.4665	0.3824	0.2212	0.375	0.4398	0.4386	0.4276	0.4206	0.438	0.4606	0.4802	0.4315	0.4159	0.5102	0.4463	0.5608	0.3892	0.3255	0.3941	0.4718	0.3782	0.3505	0.4358	0.3926	0.3607	0.494	0.5327	0.4303
NMNAT1	590	AT	6.3			0	1	0.5418	0.0847	0.5853	0.5237	0.4626	0.5325	0.6399	0.585	0.6514	0.3717	0.4702	0.5265	0.6473	0.5985	0.5335	0.6176	0.7788	0.625	0.5602	0.5614	0.5724	0.5794	0.562	0.5394	0.5198	0.5685	0.5841	0.4898	0.5537	0.4392	0.6108	0.6745	0.6059	0.5282	0.6218	0.6495	0.5642	0.6074	0.6393	0.506	0.4673	0.5697
NMNAT1	591	RI	6.2	6.1	6.3	0	1	0.401	0.077	0.8111	0.5479	0.6484	0.6446	0.7141	0.5695	0.7422	0.7639	0.7264	0.7074	0.6997	0.7611	0.6587	0.748	0.7922	0.6501	0.7049	0.7749	0.7567	0.6628	0.6911	0.6855	0.6522	0.5924	0.7674	0.5528	0.7513	0.7023	0.8028	0.7233	0.6705	0.7637	0.7902	0.7775	0.7157	0.7233	0.7019	0.6565	0.6065	0.7571
RBP7	592	ES	2	1	3	0	0.9891	0.9717	0.2079	0.8698	0.3334	0.2984	0.6354	0.3543	0.4162	0.5922	0.3999	0.784	0.7616	0.5922	0.6001	0.4535	0.4791	0.4919	0.4207	0.3756	0.4873	0.4485	0.5922	0.6765	0.4856	0.74	0.3862	0.2526	0.3011	0.8466	0.3887	0.734	0.3262	0.4817	0.6039	0.2791	0.3112	0.4291	0.5719	0.251	0.3128	0.6854	0.3034
UBE4B	593	AT	3			0	1	0.4049	0.041	0.0515	0.0482	0.0588	0.0181	0.0262	0.0151	0.0227	0.0674	0.0061	0.027	0.0224	0.0586	0.0128	0.0175	0.0369	0.0294	0.0332	0.0798	0.0524	0.0184	0.0296	0.0683	0.0402	0.0388	0.0201	0.057	0.06	0.0192	0.0311	0.0113	0.0872	0.0352	0.0482	0.06	0.0131	0.0341	0.098	0.0253	0.0605	0.0735
UBE4B	594	AT	29			0	1	0.4049	0.041	0.9485	0.9518	0.9412	0.9819	0.9738	0.9849	0.9773	0.9326	0.9939	0.973	0.9776	0.9414	0.9872	0.9825	0.9631	0.9706	0.9668	0.9202	0.9476	0.9816	0.9704	0.9317	0.9598	0.9612	0.9799	0.943	0.94	0.9808	0.9689	0.9887	0.9128	0.9648	0.9518	0.94	0.9869	0.9659	0.902	0.9747	0.9395	0.9265
UBE4B	595	AD	27.2	27.1	28	0	0.9982	0.0327	0.0032	0	0	0	0	0	0.0124	0	0	0.0048	0	0.0086	0	0	0	0	0	0	0	0	0	0	0	0.0155	0	0.0193	0	0	0	0	0	0	0	0	0	0	0	0	0	0	0.0089
UBE4B	596	ES	8	7	9	0	0.9873	1	0.0863	0.1608	0.2864	0.2592	0.2486	0.1271	0.1846	0.2905	0.1	0.0907	0.1623	0.056	0.2478	0.1324	0.1497	0.0733	0.0767	0.0642	0.0773	0.1029	0.1324	0.1306	0.1929	0.3165	0.1632	0.0717	0.0814	0.1266	0.1969	0.122	0.0896	0.206	0.175	0.2613	0.122	0.3346	0.1515	0.0874	0.1259	0.0532	0.196
KIF1B	601	AT	25			0	1	0.7142	0.1136	0.3707	0.5319	0.3918	0.3005	0.3778	0.3961	0.3915	0.5199	0.3712	0.3575	0.4551	0.2892	0.4816	0.3705	0.3559	0.3127	0.3285	0.1921	0.3361	0.296	0.2776	0.2301	0.3089	0.4891	0.2459	0.4345	0.3195	0.4762	0.3563	0.3249	0.5497	0.5112	0.3723	0.2484	0.4523	0.5534	0.3337	0.5043	0.3569	0.2794
KIF1B	602	AT	52.2			0	1	0.7142	0.1136	0.6293	0.4681	0.6082	0.6995	0.6222	0.6039	0.6085	0.4801	0.6288	0.6425	0.5449	0.7107	0.5184	0.6295	0.6441	0.6873	0.6715	0.8079	0.6639	0.704	0.7224	0.7699	0.6911	0.5109	0.7541	0.5655	0.6805	0.5238	0.6437	0.6751	0.4503	0.4888	0.6277	0.7516	0.5477	0.4466	0.6663	0.4957	0.6431	0.7206
KIF1B	604	AA	52.1	51	52.2	0	1	0.0575	0.0052	1	1	0.9822	1	1	1	1	1	0.9877	1	1	1	1	1	1	1	1	1	1	0.9729	1	1	1	1	1	1	1	1	1	1	1	1	1	1	1	1	1	1	1	1
KIF1B	606	ES	00:16:17.100000	15	17.2	0	0.8273	0.7476	0.0854	0.1841	0.0659	0.1554	0.0597	0	0.081	0.0659	0.1979	0.1583	0.037	0.1875		0.0831	0.1746	0.0218	0.1107	0.062	0.0626	0.1979	0.0714	0.0341	0.2702	0.2121	0.0406	0.1168	0.1023		0.1023	0.1333	0.1447	0.0872	0.0905			0.1052	0.2973	0.2091	0.1236	0.1399	0.078
PGD	610	ES	4	3.2	5	0	1	0.0368	0.0057	0.988	0.9804	0.989	0.9924	0.9849	0.9945	0.9842	0.9925	0.9923	0.9879	0.985	0.993	0.9951	0.9905	0.989	0.9879	0.9825	0.9926	0.9878	0.9829	0.9919	0.9933	0.9926	0.9821	0.9904	0.9843	0.9742	0.9911	0.9928	0.9909	0.9931	0.9926	0.9836	0.9792	0.9869	0.9877	0.9863	0.992	0.9945	0.9874
PGD	611	AA	3.1	2	3.2	0	1	0.0692	0.0082	0.002	0.0147	0.0076	0.0192	0.0147	0.0099	0.0141	0.0094	0.0047	0.0173	0.013	0	0.0294	0.0067	0.0144	0.009	0.0069	0.0196	0.0043	0	0.0088	0.0043	0.0031	0	0.021	0.0066	0	0.0096	0.0061	0.0125	0.0062	0.0045	0	0.0077	0.0205	0.0064	0.011	0.0133	0.0058	0.0053
PGD	612	AD	1.2	1.1	2	0	1	0.0052	0.0007	0	0	0	0	0	0	0.0002	0.0009	0	0.0015	0.0006	0	0.0018	0.0006	0	0.0019	0.0017	0.0038	0	0.0025	0	0.0008	0	0	0.0002	0.0011	0.0039	0.0003	0	0.0007	0.0003	0	0	0	0	0	0.0007	0.0013	0.0003	0.0013
APITD1	613	AT	6			0	1	0.2566	0.035	0.0207	0.0636	0.2056	0.0817	0.0475	0.0562	0.0405	0.0641	0.1133	0.165	0.0931	0.0629	0.1287	0.077	0.1316	0.0907	0.0754	0.0896	0.1667	0.0738	0.07	0.0749	0.1034	0.0732	0.1272	0.1059	0.0684	0.0735	0.0527	0.0946	0.0326	0.1706	0.0864	0.0748	0.1022	0.1281	0.1332	0.0445	0.0288	0.0459
APITD1	614	AT	5			0	1	0.2566	0.035	0.9793	0.9364	0.7944	0.9183	0.9525	0.9438	0.9595	0.9359	0.8867	0.835	0.9069	0.9371	0.8713	0.923	0.8684	0.9093	0.9246	0.9104	0.8333	0.9262	0.93	0.9251	0.8966	0.9268	0.8728	0.8941	0.9316	0.9265	0.9473	0.9054	0.9674	0.8294	0.9136	0.9252	0.8978	0.8719	0.8668	0.9555	0.9712	0.9541
DFFA	616	AT	5.3			0	1	0.5317	0.0779	0.3377	0.32	0.1565	0.3269	0.4162	0.3256	0.3616	0.2171	0.3135	0.3128	0.2925	0.3266	0.3952	0.3345	0.2341	0.2992	0.3213	0.2505	0.2597	0.2624	0.2968	0.1864	0.323	0.3586	0.2427	0.1712	0.3445	0.2748	0.5485	0.4052	0.217	0.2033	0.3168	0.5474	0.2502	0.2677	0.2386	0.2732	0.2891	0.4008
DFFA	617	AT	6			0	1	0.5317	0.0779	0.6623	0.68	0.8435	0.6731	0.5838	0.6744	0.6384	0.7829	0.6865	0.6872	0.7075	0.6734	0.6048	0.6655	0.7659	0.7008	0.6787	0.7495	0.7403	0.7376	0.7032	0.8136	0.677	0.6414	0.7573	0.8288	0.6555	0.7252	0.4515	0.5948	0.783	0.7967	0.6832	0.4526	0.7498	0.7323	0.7614	0.7268	0.7109	0.5992
DFFA	618	AD	5.2	5.1	6	0	0.9891	0.3911	0.0413	0.0747	0	0	0.08	0.0672	0	0.0368	0	0		0.0677	0	0.0834	0	0	0	0	0	0	0	0	0.0197	0.0935	0	0	0	0	0	0.0339	0	0	0.0193	0	0.0376	0.0278	0.0782	0	0	0	0
DFFA	619	ES	4	3	5.1	0	1	0.1117	0.0163	0.9919	0.9799	0.9687	0.9738	0.9797	1	0.9899	0.9778	0.9956	1	0.9879	1	0.9699	0.983	0.9755	0.9835	0.9872	0.9933	0.9777	1	0.9545	0.9954	0.9073	0.9779	1	0.9747	0.9847	0.988	0.9735	0.9587	0.9934	0.9807	0.9656	0.9558	0.9891	1	1	1	1	0.9682
PEX14	620	ES	3	2	4	0	1	0.4894	0.023	1	1	1	1	1	1	1	1	1	1	1	0.9858	1	1	1	1	1	1	1	1	1	0.9833	1	1	1	1	1	1	1	1	1	1	1	1	1	1	1	1	1	0.9822
CASZ1	621	AT	16.2			0	1	0.7752	0.1327	0.5813	0.4589	0.4926	0.4137	0.674	0.3172	0.4948	0.641	0.3633	0.4547	0.584	0.3479	0.6467	0.4054	0.6985	0.3334	0.2857	0.5225	0.5134	0.421	0.3707	0.3946	0.4849	0.4041	0.2908	0.2807	0.6347	0.3248	0.6563	0.3339	0.5079	0.4212	0.3925	0.6218	0.4779	0.4054	0.3702	0.4471	0.3974	0.4472
CASZ1	622	AT	21			0	1	0.7752	0.1327	0.4187	0.5411	0.5074	0.5863	0.326	0.6828	0.5052	0.359	0.6367	0.5453	0.416	0.6521	0.3533	0.5946	0.3015	0.6666	0.7143	0.4775	0.4866	0.579	0.6293	0.6054	0.5151	0.5959	0.7092	0.7193	0.3653	0.6752	0.3437	0.6661	0.4921	0.5788	0.6075	0.3782	0.5221	0.5946	0.6298	0.5529	0.6026	0.5528
TARDBP	629	RI	7.5	7.4	7.6	0	1	0.0809	0.007	0.991	0.9905	0.9944	0.9958	0.998	0.9924	0.9958	0.9986	0.9928	0.9916	1	0.9973	0.9957	0.993	0.9924	0.9877	0.9961	0.9788	0.9917	0.9664	0.9932	0.9925	0.9985	0.994	0.9978	0.9941	0.9914	0.9916	1	0.991	0.9946	0.9967	0.9938	0.9928	0.9898	0.99	1	0.9974	0.9964	0.997
TARDBP	630	RI	7.3	7.2	7.4	0	1	0.0365	0.0042	0.9941	1	0.998	1	1	0.9914	1	0.9937	0.997	0.9897	1	0.9956	0.9942	1	0.991	0.9956	0.9968	0.9969	0.9976	0.9965	1	0.9892	1	1	0.9981	0.992	1	0.9979	0.9923	0.9976	0.9948	0.9932	0.9955	0.9958	0.9959	0.9982	0.9918	0.998	1	0.996
TARDBP	631	RI	7.2:7.3	7.1	7.4	0	1	0.0265	0.0038	1	0.9974	1	0.9935	1	1	0.9975	1	0.9985	1	1	0.9956	0.9914	1	0.991	0.9935	0.9938	0.9969	0.9976	1	1	0.9973	0.9974	1	0.9981	0.9984	0.9922	0.9979	0.9961	0.9976	1	1	0.9956	0.9958	0.9979	0.9946	1	1	0.9951	0.998
TARDBP	633	ES	03:04:00	2	5	0	1	0.2636	0.0408	1	0.9703	0.9794	0.9069	0.8673	0.9652	0.9468	0.97	0.934	1	0.9747	0.9502	0.9123	0.9648	1	0.9747	0.925	1	1	0.9389	0.952	1	1	0.968	0.9845	0.983	0.9744	1	0.9707	0.9793	0.9538	0.9634	1	0.9362	0.9826	0.9151	0.9492	0.948	1	0.9786
TARDBP	634	ES	4	2	5	0	1	0.0446	0.0049	1	0.9963	0.9973	0.9856	0.9829	0.9935	0.9918	0.9971	0.9935	1	0.9968	0.9937	0.9849	0.9965	1	0.9967	0.991	1	1	0.9894	0.99	1	1	0.9951	0.9965	0.998	0.9949	1	0.9973	0.9962	0.9952	0.9948	1	0.9927	0.9972	0.9908	0.992	0.9939	1	0.9966
TARDBP	635	ES	3	2	4	0	1	0.6566	0.0683	0.1158	0.1358	0.1383	0.1564	0.127	0.1902	0.165	0.1105	0.1065	0.1626	0.1394	0.1379	0.17	0.1098	0.1701	0.1407	0.1309	0.1535	0.1039	0.1734	0.2029	0.1723	0.2123	0.1588	0.2261	0.1241	0.2038	0.2348	0.1071	0.1911	0.1151	0.1507	0.1889	0.1234	0.1693	0.1147	0.1639	0.1221	0.1213	0.1636
MASP2	636	AT	12			0	0.9673	0.8088	0.0709	1	1	1	1	1	1	0.7383	1	1	1	1	1	1	1	1	0.9573	1	1	1	1	1	1	1	1	0.9383	1	1	1	1	1	1	1	1	1	0.9717	1	0.7547	1	1	0.9125
MASP2	637	AT	5			0	0.9673	0.8088	0.0709	0	0	0	0	0	0	0.2617	0	0	0	0	0	0	0	0	0.0427	0	0	0	0	0	0	0	0	0.0617	0	0	0	0	0	0	0	0	0	0.0283	0	0.2453	0	0	0.0875
SRM	640	AA	2.1	1	2.2	0	1	0.166	0.0266	0.0797	0.07	0.078	0.0668	0.0763	0.047	0.0865	0.1239	0.1223	0.1189	0.1025	0.1252	0.0912	0.0337	0.1017	0.1092	0.0598	0.034	0.1027	0.0927	0.0785	0.1335	0.0912	0.0428	0.0886	0.1131	0.0432	0.0512	0.0579	0.1003	0.0971	0.0699	0.084	0.0886	0.1	0.104	0.0821	0.0695	0.0606	0.0622
EXOSC10	643	ES	18	17	19	0	1	0.0406	0.0062	0.9884	0.9949	1	0.994	1	1	0.9942	0.9925	0.9971	0.9855	1	1	1	0.9944	0.9966	0.9957	1	1	1	1	0.995	1	0.9939	0.9594	0.9948	0.9937	0.9957	1	0.9873	0.9813	1	0.9892	1	0.9935	1	0.9935	1	0.9923	0.9932	0.9927
EXOSC10	644	RI	16.4	16.3	16.5	0	1	0.5508	0.0749	0.147	0.1363	0.1408	0.2113	0.1035	0.1684	0.101	0.1131	0.1538	0.1619	0.2043	0.1504	0.137	0.087	0.1178	0.1679	0.213	0.1919	0.2249	0.156	0.2818	0.1551	0.1858	0.226	0.1692	0.2774	0.2294	0.2945	0.1347	0.2734	0.1176	0.1226	0.2859	0.2561	0.3042	0.1372	0.1862	0.1454	0.2483	0.1909
EXOSC10	645	RI	16.2	16.1	16.3	0	1	0.4691	0.078	0.1477	0.0903	0.1283	0.1461	0.0843	0.1111	0.0401	0.1399	0.0883	0.1169	0.11	0.1334	0.1173	0.0476	0.1055	0.1627	0.1205	0.124	0.156	0.1286	0.1703	0.1594	0.1522	0.2035	0.1412	0.2953	0.1801	0.2428	0.1125	0.1947	0.0888	0.1256	0.1995	0.181	0.2738	0.1121	0.1953	0.0943	0.1837	0.2009
EXOSC10	647	ES	4	3	5	0	1	0.7584	0.1205	0.3732	0.397	0.4065	0.4686	0.4215	0.5	0.4729	0.4025	0.4258	0.5366	0.4689	0.5289	0.5324	0.386	0.3648	0.5581	0.4222	0.4151	0.4089	0.4965	0.528	0.4848	0.5721	0.5342	0.4518	0.4286	0.4349	0.5995	0.5185	0.4976	0.381	0.3492	0.4853	0.5486	0.4626	0.3293	0.5378	0.4957	0.4259	0.6325
MTOR	648	AP	1			0	0.8709	1	0.1727	0.8934	0.8526	0.9204	0.9011	0.9278	0.9536	0.7713	0.931	0.8785	0.9391	0.8852	0.9152	0.9278	0.8526	0.8925	0.746	0.9487	0.9686	0.9391	0.7756	0.7125	0.9939	0.7723	0.7741	0.7825	0.7731	0.785	0.9278	0.9131	0.6474	0.9547	0.9679	0.833	0.6878	0.8635	0.9402	0.906	0.6817	0.8692	0.794
MTOR	649	AP	39.1			0	0.8709	1	0.1727	0.1066	0.1474	0.0796	0.0989	0.0722	0.0464	0.2287	0.069	0.1215	0.0609	0.1148	0.0848	0.0722	0.1474	0.1075	0.254	0.0513	0.0314	0.0609	0.2244	0.2875	0.0061	0.2277	0.2259	0.2175	0.2269	0.2149	0.0722	0.0869	0.3526	0.0453	0.0321	0.167	0.3122	0.1365	0.0598	0.094	0.3183	0.1308	0.206
UBIAD1	650	AT	3			0	1	0.2395	0.0362	0.0796	0.077	0.0788	0.0639	0.0422	0.0414	0.0551	0.057	0.0566	0.0092	0.0805	0.0523	0.0647	0.0615	0.0695	0.0814	0.0842	0.0617	0.0496	0.0764	0.0647	0.0428	0.1179	0.0978	0.0537	0.1047	0.0366	0.0652	0.1278	0.0779	0.1788	0.0812	0.0798	0.043	0.1171	0.1948	0.0834	0.0645	0.0521	0.0581
UBIAD1	651	AT	2			0	1	0.2395	0.0362	0.9204	0.923	0.9212	0.9361	0.9578	0.9586	0.9449	0.943	0.9434	0.9908	0.9195	0.9477	0.9353	0.9385	0.9305	0.9186	0.9158	0.9383	0.9504	0.9236	0.9353	0.9572	0.8821	0.9022	0.9463	0.8953	0.9634	0.9348	0.8722	0.9221	0.8212	0.9188	0.9202	0.957	0.8829	0.8052	0.9166	0.9355	0.9479	0.9419
FBXO44	654	AP	1			0	0.98	0.4629	0.0645	0.0678	0.1195	0.0738	0.1676	0.0758	0.1929	0.1068	0.2293	0.1308	0.3581	0.114	0.0809	0.1254	0.0758	0.2085	0.2494	0.1593	0.075	0.0809	0.1167	0.1068	0.1589	0.2333	0.1041	0.1484	0.0218	0.13	0.0678	0.1824	0.1498	0.2283	0.1536	0.0952	0.1051	0.0678	0.0896	0.0829	0.1375	0.0825	0.0738
FBXO44	655	AP	2			0	0.98	0.4629	0.0645	0.9322	0.8805	0.9262	0.8324	0.9242	0.8071	0.8932	0.7707	0.8692	0.6419	0.886	0.9191	0.8746	0.9242	0.7915	0.7506	0.8407	0.925	0.9191	0.8833	0.8932	0.8411	0.7667	0.8959	0.8516	0.9782	0.87	0.9322	0.8176	0.8502	0.7717	0.8464	0.9048	0.8949	0.9322	0.9104	0.9171	0.8625	0.9175	0.9262
FBXO44	656	AD	5.2	5.1	6	0	0.9473	0.3327	0.0669	1	0.8922	0.9475	1	0.9346	0.9003	0.9072	1	0.9003		1	1	1	1	0.9198	0.9475	0.8302	1	0.943	0.8713	0.9454	0.9601	0.7505	1	1	0.9003	0.8122	0.7899	0.7899	0.8922	0.9495	0.9787	1	0.9475	0.8404	1	0.8713	0.8922	1	0.9233
FBXO44	657	ES	5.2:6	5.1	7	0	0.9982	0.6195	0.1181	0.5628	0.6345	0.6837	0.8289	0.6792	0.8884	0.6316	0.6037	0.7105	0.7115	0.5898	0.8891	0.7726	0.6176	0.7291	0.7321	0.761	0.8912	0.6251	0.7912	0.6866	0.7607	0.6768	0.7038	0.5278	0.4011	0.833	0.6747	0.5945	0.65	0.6798	0.6683	0.8359	0.6693	0.6085	0.6112	0.3076	0.7434	0.6916	0.7507
FBXO44	658	ES	6	5.1	7	0	0.9182	0.7064	0.1315	0	0.1818	0.1137	0	0.1407	0.4809	0.1592	0	0.2301	0.7064	0		0	0	0.2053	0.1437	0.4072		0.0984	0.3805	0.1182	0.1282	0.4334	0	0	0.0766	0.5539	0.3702	0.304	0.1942	0.1112	0.0455	0	0.1099	0.2441	0	0.0671	0.2739	0	0.2108
FBXO44	659	AA	3.1	2	3.2	0	0.9564	0.6628	0.122	1	0.7106	0.8638	1	1	1	0.5709	0.8958	0.8626	0.6718	1	1	1	1	1	0.766	0.7603	1	0.7603	0.8619	1	0.7268	1	1	0.5511	1	0.9291	0.7458	0.8805	0.7543	1	0.8805	1	1	0.6653	0.8805	0.7268	1	1	0.9197
FBXO44	660	ES	3.1:3.2	2	4	0	0.9909	0.9564	0.1345	0.1519	0.0873	0.2748	0.2561	0.3736	0.1606	0.2713	0.3223	0.3851	0.5063	0.3378	0.1844	0.2356	0.1771	0.3192	0.2678	0.2142	0.303	0.2854	0.6068	0.3429	0.2329	0.4717	0.2391	0.2316	0.455	0.2883	0.3919	0.5254	0.3439	0.2132	0.1531	0.1657	0.3118	0.1858	0.1294	0.2757	0.1606	0.226	0.2759
FBXO44	661	ES	3.2	2	4	0	0.8782	0.4015	0.0531	0	0.0301	0.0553	0	0	0	0.2019	0.0494	0.0861		0	0	0	0	0	0.0968	0.0801	0	0.1082	0.1861	0	0.1029		0	0.1824	0	0.0279	0.1557	0.1369	0.1302	0	0.0218	0	0	0.0949	0.0199	0.1355	0	0	0.0304
MAD2L2	664	AD	7.2	7.1	8	0	1	0.127	0.018	0.0268	0.0709	0.0327	0.0397	0.0485	0.0371	0.0558	0.012	0.0246	0.0098	0.0281	0.0346	0.0533	0.0541	0.0317	0.0374	0.0288	0.0382	0.0323	0.045	0.0377	0.0184	0.0657	0.0157	0.0285	0.0387	0.059	0.0623	0.0493	0.0568	0.048	0.0299	0.0072	0.0203	0.0352	0.0366	0.0435	0.0352	0.0575	0.0464
MAD2L2	665	ES	02:03:00	1	4	0	1	0.9174	0.193	0.8247	1	0.3419	1	0.9431	1	0.9584	0.7713	0.3927	0.8818	0.9338	1	0.8599	0.9272	1	0.9272	1	0.7344	0.4219	0.7239	0.9564	0.8165	1	0.3503	1	0.9333	0.9307	0.9227	0.9063	0.6713	0.6811	0.9676	1	1	0.6418	0.8735	0.854	1	0.854	1
AGTRAP	666	AD	6.2	6.1	7	0	1	0.3231	0.0355	0.8506	0.7811	0.8864	0.8858	0.8109	0.8728	0.8155	0.8276	0.8633	0.8037	0.8616	0.9055	0.8527	0.7367	0.789	0.8355	0.8281	0.8434	0.8737	0.8206	0.8383	0.8531	0.7903	0.8274	0.7701	0.8236	0.8101	0.7758	0.7522	0.7918	0.8096	0.8333	0.8115	0.8186	0.8129	0.8263	0.8486	0.8777	0.8392	0.8479
AGTRAP	667	ES	4.1:4.2:5	3	6.1	0	0.9964	0.2991	0.0292	1	1	1	1	1	1	1	1	1	1	1	1	1	1	0.9868	1	1	0.9239	1	1	1	0.9817	1	1	1	1	1	1	1	1	0.9795	1	1	1	0.8153	1	1	1	1	1
AGTRAP	668	ES	4.2:5	3	6.1	0	0.9818	0.1822	0.0186	1	1	1	1	1	1	1	1	1	1	1	1	1	1	0.9875	1	1	0.9577	1	1	1	0.9874	1	1	1	1	1	1	1	1	0.9936	1	1	1	0.8178	1	1	1	1	1
AGTRAP	669	ES	5	3	6.1	0	1	0.0362	0.0026	1	1	1	1	1	1	1	1	1	1	1	1	1	1	0.9993	1	1	0.9909	1	1	1	0.9975	1	1	1	1	1	1	1	1	0.9988	1	1	1	0.9638	1	1	1	1	1
AGTRAP	670	AA	4.1	3	4.2	0	0.9818	0.8828	0.1462	0.3215	0.5292	0.6597	0.4749	0.4684	0.5127	0.1813	0.4042	0.6767	0.5377	0.5842	0.2563	0.6597	0.5377	0.5564	0.5435	0.6079	0.4134	0.7159	0.7672	0.6356	0.4904	0.5757	0.5377	0.3408	0.7307	0.4241	0.6597	0.3925	0.6597	0.2952	0.6012	0.4367	0.5377	0.578	0.6223	0.4659	0.3518	0.6079	0.4589
AGTRAP	671	ES	4.1:4.2	3	5	0	1	0.4871	0.0526	0.101	0.1707	0.1334	0.1388	0.0835	0.12	0.0316	0.122	0.2557	0.1471	0.1464	0.0671	0.0948	0.108	0.0773	0.1132	0.1296	0.1402	0.1042	0.0749	0.1246	0.1703	0.1734	0.0928	0.122	0.2213	0.1098	0.1629	0.0668	0.1327	0.0806	0.115	0.114	0.0859	0.204	0.081	0.0733	0.0893	0.1035	0.1532
AGTRAP	672	ES	4.2	3	5	0	1	0.399	0.0619	0.2119	0.1698	0.0834	0.1876	0.1096	0.1384	0.1473	0.1797	0.1846	0.1479	0.1226	0.1809	0.0604	0.1023	0.0687	0.1159	0.0966	0.2065	0.0497	0.0263	0.0808	0.2014	0.1348	0.0847	0.2368	0.1187	0.1689	0.1098	0.1208	0.0874	0.1941	0.0922	0.1427	0.1007	0.1784	0.0602	0.0861	0.1688	0.0768	0.2055
AGTRAP	675	ES	3:4.1:4.2	1	5	0	0.9509	0.7115	0.12	0.6699	1	0.8095	0.6089	0.9102	0.8886		1	1	1	0.9181	1	0.8172	1	0.7875	1	0.9239	0.825	1	0.8693	1	0.9374	1	1	1	0.9535	0.94	0.9296	0.8237	0.8478	0.8489	0.8782	1	1	0.9537	1			0.8432	1
AGTRAP	677	ES	00:03:04.200000	1	5	0	0.9673	0.5111	0.0744	0.9461	1	0.7837	0.8839	0.9545	0.9333	1	1	1	1	0.9431	1	0.819	1	0.8453	1	0.934	0.916	1	0.7924	1	0.9663	1	1	1	0.9406	0.977	0.9337	0.9194	0.8367	0.9581	0.9051	1	1	0.9676	1	0.8734	0.802	0.9253	1
AGTRAP	679	ES	3	1	5	0	0.9982	0.0646	0.0082	0.9884	1	0.9782	0.977	0.9951	0.9905	1	1	1	1	0.9931	1	0.9886	1	0.9884	1	0.9933	0.9802	1	0.9936	1	0.9929	1	1	1	0.9929	0.9963	0.9926	0.9899	0.984	0.9921	0.9913	1	1	0.9939	1	0.9884	0.9585	0.9939	1
AGTRAP	680	ES	2	1	3	0	1	0.0971	0.0138	0.0076	0.0187	0.0088	0.0169	0.0162	0.06	0	0	0.0077	0.0211	0.005	0	0	0.0057	0.0093	0.0122	0.005	0.0115	0.0304	0.0103	0.0441	0.0074	0	0	0	0.0159	0.0079	0	0	0.0199	0.0154	0.0095	0.0239	0	0.0124	0.0147	0	0.0174	0.0372	0
CLCN6	686	AT	24			0	1	0.6809	0.0767	0.6752	0.7135	0.7263	0.7308	0.6913	0.7195	0.5239	0.5821	0.6006	0.565	0.7254	0.7398	0.7181	0.6548	0.798	0.7893	0.7562	0.6848	0.6857	0.6657	0.6608	0.6458	0.563	0.5875	0.6359	0.6358	0.7183	0.5542	0.7292	0.6276	0.722	0.6382	0.6982	0.7054	0.6219	0.6602	0.5615	0.5632	0.6564	0.653
CLCN6	687	AT	23.2			0	1	0.0791	0.0135	0.021	0.0194	0.0059	0.0144	0.0193	0.0031	0.0269	0.0209	0.0322	0.0054	0.0229	0.0298	0.0187	0.0257	0.0136	0.0132	0.0186	0.0301	0.0196	0.0324	0.0232	0.0331	0	0.0436	0	0.0343	0.0083	0.0259	0.0281	0.0194	0	0.0458	0.0111	0	0.0444	0.0221	0.0129	0.0059	0.0222	0.0332
CLCN6	688	AT	6			0	1	0.6613	0.0747	0.3039	0.2671	0.2678	0.2548	0.2894	0.2773	0.4492	0.397	0.3672	0.4296	0.2517	0.2303	0.2633	0.3196	0.1884	0.1975	0.2251	0.2852	0.2947	0.3018	0.316	0.3211	0.437	0.3689	0.3641	0.3299	0.2734	0.4199	0.2427	0.353	0.278	0.3161	0.2907	0.2946	0.3337	0.3177	0.4255	0.431	0.3214	0.3138
CLCN6	689	ES	13	12	14	0	0.9436	0.8285	0.1617	0.8859	0.7072	0.8787	0.8544	0.6422	0.8138	0.648	0.7341	0.5586	1	0.7796	0.697	0.7564	0.7341	0.5799	0.7837	0.7035	0.7012	0.9355	0.501	0.7072	0.6668			0.8613	0.6112	0.5695	0.6815	0.4632	0.7257	0.8804	0.789	0.8285	0.3516	0.781	0.5471	0.7341	0.5087	0.8233	0.5586
CLCN6	690	ES	3	2	4	0	0.8982	0.1795	0.0145	1	1	1	1	1	1	1	1	1	1	1	1	1	1	1	1	1	1	1	1	1	1		1	1	1	1	1	1	1	1	1	1	1	1	1	1		1	1
KIAA2013	693	AT	2.2			0	1	0.1325	0.0191	0.046	0.0688	0.0865	0.049	0.043	0.0436	0.0184	0.0963	0.0748	0.0677	0.035	0.0264	0.0354	0.0439	0.0183	0.0424	0.049	0.0255	0.0489	0.0499	0.0666	0.0331	0.0269	0.0465	0.0182	0.0766	0.0275	0.0714	0.0186	0.0543	0.0507	0.0436	0.0388	0.0211	0.0858	0.0709	0.0518	0.0354	0.0746	0.0195
KIAA2013	694	AT	3			0	1	0.1325	0.0191	0.954	0.9312	0.9135	0.951	0.957	0.9564	0.9816	0.9037	0.9252	0.9323	0.965	0.9736	0.9646	0.9561	0.9817	0.9576	0.951	0.9745	0.9511	0.9501	0.9334	0.9669	0.9731	0.9535	0.9818	0.9234	0.9725	0.9286	0.9814	0.9457	0.9493	0.9564	0.9612	0.9789	0.9142	0.9291	0.9482	0.9646	0.9254	0.9805
PLOD1	695	ES	2	1	3	0	1	0.2745	0.0288	0.057	0.0273	0.0897	0.0477	0.0634	0.0539	0.0483	0.0373	0.0587	0.0497	0.0269	0.048	0.0413	0.0301	0.0578	0.0445	0.0287	0.0902	0.0243	0.0758	0.0755	0.0833	0.0552	0.0496	0.0257	0.061	0.0619	0.0196	0.0812	0.0675	0.0396	0.0444	0.0897	0.0229	0.0454	0.0284	0.0101	0.0471	0.0595	0.0429
MFN2	696	ES	2	1	3	0	1	0.1898	0.025	0.9503	0.9695	0.9789	0.9598	0.9223	0.9735	0.9502	0.9529	0.9618	0.9513	0.9782	0.9688	0.9275	0.95	0.9466	0.9604	0.9496	0.9725	0.9442	0.9775	0.9906	0.9718	0.9791	0.9728	0.9743	0.9358	0.9628	0.951	0.9605	0.9523	0.9413	0.963	0.9359	0.9415	0.974	0.9618	0.9477	0.9659	0.9597	0.991
MIIP	697	ES	8	7	9	0	0.9982	0.1682	0.0081	0.9902	1	1	1	0.9944	1	0.9944	0.9915	1	1	1	1	1	1	0.9924	1	1	1	1	1	0.9908	1	1	1	1	0.9818	1	0.9908	0.9952	1	1	0.9944	1	1	0.9943	0.9935	1	1	1	1
TNFRSF1B	702	AT	5			0	1	0.0131	0.0009	0	0	0	0	0	0	0	0	0	0	0	0	0	0	0	0	0	0	0	0	0	0	0	0	0	0	0	0	0	0	0	0	0	0	0	0	0	0	0	0
TNFRSF1B	703	AT	11			0	1	0.0131	0.0009	1	1	1	1	1	1	1	1	1	1	1	1	1	1	1	1	1	1	1	1	1	1	1	1	1	1	1	1	1	1	1	1	1	1	1	1	1	1	1	1
PDPN	710	AP	1.1			0	0.9982	0.3766	0.0592	1	0.9352	0.9744	0.8938	0.9814	0.946	0.8742	0.9822	0.9867	0.9527	0.9881	0.9565	0.9535	0.8529	0.778	0.9716	0.9661	0.9305	0.9709	0.92	0.9861	0.958	0.9075	1	0.8203	0.9515	0.9115	0.9271	0.9501	0.863	0.9112	0.9262	0.8845	0.9366	0.9482	0.9657	0.8928	0.8924	0.9361	1
PDPN	711	AP	2			0	0.9982	0.3385	0.0485	0	0.0388	0.01	0.0985	0.0086	0.054	0.1132	0	0	0.0232	0.0097	0.0312	0.0306	0.1354	0.1997	0.0159	0.019	0.039	0	0.0609	0.0087	0.0164	0.0519	0	0.1325	0.0485	0.0636	0.0284	0.028	0.1279	0.0732	0.0531	0.083	0.0455	0.041	0.0192	0.0913	0.0773	0.0639	0
PDPN	712	AP	3.1			0	0.9982	0.3415	0.0287	0	0.026	0.0157	0.0077	0.01	0	0.0127	0.0178	0.0133	0.0242	0.0022	0.0122	0.0159	0.0118	0.0223	0.0125	0.0149	0.0305	0.0291	0.0191	0.0051	0.0256	0.0406	0	0.0472	0	0.0249	0.0445	0.0219	0.0091	0.0156	0.0208	0.0325	0.0178	0.0107	0.0151	0.0159	0.0303	0	0
PDPN	713	AD	8.2	8.1	9	0	0.9927	0.5474	0.0612	0.686	0.6008	0.5311	0.5921	0.6176	0.5677	0.5988	0.5138	0.5841	0.6171	0.5336	0.5494	0.5753	0.6879	0.5689	0.5881	0.6472	0.6879	0.5858	0.6396	0.5753	0.6413	0.8047	0.5184	0.6326	0.5478	0.6218	0.6026	0.6267	0.7088	0.6195	0.589	0.6519	0.6221	0.5163	0.5599	0.6783	0.6327	0.6425	0.5766
PDPN	714	ES	6	5	7	0	1	0.0469	0.0046	1	1	1	0.9975	1	1	1	0.9969	1	0.9959	0.9965	0.9921	0.9978	1	0.9976	0.9961	1	1	1	0.997	0.999	1	1	1	1	1	0.9947	1	1	0.994	0.9976	0.9941	0.993	1	1	1	1	1	1	1
PDPN	717	AD	1.2	1.1	5	0	0.9691	0.1538	0.0149	0.0244	0.0123	0.0189	0	0.0104	0.0064	0.0086	0.0114	0.0083	0.0046	0.0007	0	0.0107	0.0229	0.0377	0.0094	0	0	0	0	0.0032	0.0116	0	0	0.0317	0	0.0057	0.0053	0.0154	0.0143	0.0103	0	0	0.0426	0	0.0039	0.0128	0.0037	0	0.0455
PRDM2	721	AT	11			0	1	0.4889	0.0836	0.8581	0.8299	0.7511	0.5819	0.7424	0.7129	0.8844	0.7282	0.454	0.7995	0.734	0.6831	0.7001	0.8284	0.8274	0.6909	0.6051	0.7515	0.7821	0.6579	0.6755	0.7148	0.7606	0.65	0.8064	0.8709	0.646	0.8208	0.7922	0.7971	0.8246	0.8081	0.7664	0.7455	0.7175	0.6359	0.884	0.8944	0.8151	0.8015
PRDM2	722	AT	13			0	1	0.4889	0.0836	0.1419	0.1701	0.2489	0.4181	0.2576	0.2871	0.1156	0.2718	0.546	0.2005	0.266	0.3169	0.2999	0.1716	0.1726	0.3091	0.3949	0.2485	0.2179	0.3421	0.3245	0.2852	0.2394	0.35	0.1936	0.1291	0.354	0.1792	0.2078	0.2029	0.1754	0.1919	0.2336	0.2545	0.2825	0.3641	0.116	0.1056	0.1849	0.1985
PRDM2	723	ES	10	9	12	0	0.9491	0.8402	0.1877	0.3411	0.8755	0.6539	0.8567	0.4427	0.8948	0.6075	1	1	0.867	0.8528	0.6896	0.9111		1	0.8989	0.7171	0.46	0.841	0.9129	0.8267	0.9227	0.8986	0.8812		0.8739	0.7276	1	0.5959	1	1	1	0.8044	0.6361	0.9408	1	0.8104	1	0.7966	0.6045
PRDM2	724	ES	08:09:10	7	12	0	0.8673	1	0.3011	0.2071	0.5915	0.1776	0.7524	0.4996	0.4719	0.2927	0.4159	0.9049	0.0872	0.242	0.6786	0.1893		0.098	0.355	0.3277	0.0503	0.6359	0.8183	0.5229	0.5961	0.435	0.5582		0.1782	0.22	1	0.2844	1	0.4467	1	0.3801	0.1117	0.354	0.3371		0.3335	1	0.5357
PRDM2	725	ES	09:10:00	7	12	0	0.9473	0.8473	0.2014	0.4825	0.8462	0.695	0.9365	0.6791	0.8251	0.5257	0.8988	0.9842	0.6022	0.7475	0.9168	0.8285		0.3145	0.7474	0.7876	0.441	0.9334	0.8536	0.8393	0.9116	0.7827	0.8587		0.6003	0.7525	1	0.5159	1	0.83	1	0.8829	0.3092	0.7231	0.8042	1	0.6775	1	0.8642
PRDM2	728	ES	8	7	9	0	0.9018	0.4689	0.0836	0.234	0.22	0.0953	0.192	0.3484	0.1603	0.2895	0.0803	0.1409	0.0636	0.1062	0.1818	0.0526	0.1196	0.2174	0.1692	0.1279	0.0671	0.1196	0.4689	0.1964	0.1325	0.1964	0.1903	0.1401	0.1413	0.0891	0.1964	0.2996	0.2733	0.1594	0.3374	0.084		0.1903	0.1257	0	0.2174	0.0966	0.1692
KAZN	729	AP	1.1			0	0.8255	0.9667	0.1877	0.2367	0.0144	0.2194	0.0209	0	0	0.5752	0	0	0.5451	0.3611	0	0.5168	0	0	0.0269	0.0375	0	0	0	0.3563	0.0415	0	0.0728	0.3628		0.3011	0.5214	0	0.1319	0.2055	0	0.1971		0.4062	0.6098	0.0958		0
KAZN	730	AP	3			0	0.8255	0.6531	0.1076	0	0.0873	0.0762	0.0724	0	0.0448	0	0.1082	0.3597	0.0526	0	0.3583	0	0.104	0.021	0.1637	0.0325	0	0.286	0.1411	0	0.072	0	0.0632	0		0.0654	0.151	0.0493	0	0	0.1169	0.1712		0	0.0722	0.0832		0.2122
KAZN	731	AP	2			0	0.8255	1	0.2511	0.366	0.1629	0.5202	0.0752	0.4994	0.0665	0.3877	0.578	0.6403	0.2497	0.2925	0.081	0.2663	0.4938	0.8366	0.0972	0.0965	0.9516	0.2716	0.5861	0.2449	0.4167	0.2904	0.3752	0.561		0.3492	0.2911	0.7602	0.2039	0.6566	0.5724	0.1354		0.3664	0.2714	0.7406		0.3777
KAZN	732	AP	4			0	0.8255	0.9503	0.24	0.3974	0.7355	0.1842	0.8315	0.5006	0.8886	0.0371	0.3138	0	0.1525	0.3464	0.5607	0.2169	0.4022	0.1424	0.7122	0.8334	0.0484	0.4424	0.2728	0.3988	0.4698	0.7096	0.4888	0.0761		0.2844	0.0365	0.1905	0.6642	0.138	0.3107	0.4963		0.2273	0.0465	0.0804		0.4101
KAZN	733	AT	11.2			0	1	0.6977	0.1057	0.924	0.7538	0.506	0.7401	0.9091	0.7123	0.9191	0.9156	0.3651	0.9145	0.7517	0.7901	0.839	0.9179	0.9574	0.7838	0.7339	0.9346	0.7777	0.7966	0.6944	0.888	0.7126	0.8888	0.9431	0.7236	0.8505	0.9106	0.8252	0.8765	0.8879	0.9159	0.7922	0.8998	0.6222	0.7393	0.9542	0.9067	0.8456	0.7406
KAZN	734	AT	18			0	1	0.6977	0.1057	0.076	0.2462	0.494	0.2599	0.0909	0.2877	0.0809	0.0844	0.6349	0.0855	0.2483	0.2099	0.161	0.0821	0.0426	0.2162	0.2661	0.0654	0.2223	0.2034	0.3056	0.112	0.2874	0.1112	0.0569	0.2763	0.1495	0.0894	0.1748	0.1235	0.1121	0.0841	0.2078	0.1002	0.3778	0.2607	0.0458	0.0933	0.1544	0.2594
TMEM51	736	AP	2			0	0.9673	0.9138	0.1574	0.5512	0.4661	0.4659	0.727	0.6615	0.4073	0.2888	0.5537	0.5678	0.6261	0.2768	0.4606	0.6383	0.3755	0.4354	0.3583	0.2663	0.5586	0.2575	0.3028	0.5275	0.6549	0.5894	0.5275	0.3317	0.5418	0.4757	0.2216	0.3523	0.3471	0.5738	0.5715	0.4606	0.3895	0.5194	0.6209	0.2632	0.489	0.3331	0.8701
TMEM51	737	AP	1			0	0.9673	0.9138	0.1574	0.4488	0.5339	0.5341	0.273	0.3385	0.5927	0.7112	0.4463	0.4322	0.3739	0.7232	0.5394	0.3617	0.6245	0.5646	0.6417	0.7337	0.4414	0.7425	0.6972	0.4725	0.3451	0.4106	0.4725	0.6683	0.4582	0.5243	0.7784	0.6477	0.6529	0.4262	0.4285	0.5394	0.6105	0.4806	0.3791	0.7368	0.511	0.6669	0.1299
TMEM51	738	AA	5.1	4	5.2	0	0.98	0.3172	0.0314	1	0.9621	1	0.9718	0.9626	1	1	1	0.9348	0.9305	0.9617	1	0.9626	1	0.9896	1	0.9242	1	0.9399	0.9565	0.9515	0.9387	1	0.9782	0.8959	0.969	1	1	0.9593	0.9591	0.9606	0.9701	1	1	1	0.9532	0.9684	0.8844	0.9834	1
TMEM51	739	ES	3	2	4	0	0.88	0.7794	0.1366	0.4315	0.6637	0.7385	0.7721	0.6529	0.6398	0.8453	0.5931	0.5807	0.4246	0.7187	0.7912	0.4895	0.8884	0.6158	0.7632	0.5788	0.6362	0.7571	0.4505	0.4266	0.5691	0.6862	0.4959	0.6567	0.5974	0.5274	0.7219	0.782	0.5974	0.7217	0.535	0.8372		0.585	0.4553	0.546	0.7321	0.6284	0.6862
FHAD1	747	AT	15.2			0	0.9909	0.9515	0.2088	0.2174	0.211	0.3708	0	0.8842	0.2734	0	0.325	0.5183	0	0.2841	0.0672	0.606	0.1467	0.8708	0.0478	0.0168	0.0878	0.295	0.2265	0.1075	0.4745	0	0.2982	0.3964	0.0513	0.3486	0.2703	0.3758	0.1899	0.2022	0.3024	0.2256	0	0.4038	0.33	0	0.189	0.0792	0.3758
FHAD1	748	AT	34			0	0.9909	0.2605	0.044	0	0.0646	0.071	0	0	0	0	0	0	0	0	0.0147	0.0714	0	0	0.0122	0	0	0.1129	0	0	0	0	0	0	0	0	0	0	0.0582	0	0	0	0	0	0	0	0	0	0
FHAD1	749	AT	36			0	0.9909	0.9515	0.2126	0.7826	0.7244	0.5582	1	0.1158	0.7266	1	0.675	0.4817	1	0.7159	0.9181	0.3227	0.8533	0.1292	0.94	0.9832	0.9122	0.5921	0.7735	0.8925	0.5255	1	0.7018	0.6036	0.9487	0.6514	0.7297	0.6242	0.7519	0.7978	0.6976	0.7744	1	0.5962	0.67	1	0.811	0.9208	0.6242
CASP9	758	AP	2			0	0.9945	0.2718	0.0426	0.9687	1	0.9818	0.9575	0.8911	0.9554	0.9463	1	0.9717	0.9207	0.949	0.9407	0.9702	1	0.9355	0.9301	0.9036	1	0.9414	0.9595	1	0.9779	0.9333	1	1	0.9113	0.9702	1	0.9057	0.9728	0.839	1	1	1	0.9063	0.9838	0.9067	1	0.9686	0.8662
CASP9	759	AP	1			0	0.9945	0.2718	0.0426	0.0313	0	0.0182	0.0425	0.1089	0.0446	0.0537	0	0.0283	0.0793	0.051	0.0593	0.0298	0	0.0645	0.0699	0.0964	0	0.0586	0.0405	0	0.0221	0.0667	0	0	0.0887	0.0298	0	0.0943	0.0272	0.161	0	0	0	0.0937	0.0162	0.0933	0	0.0314	0.1338
CASP9	760	RI	9.2	9.1	9.3	0	0.9982	0.0988	0.0143	0.0063	0.006	0.0194	0.0023	0	0.0293	0.0038	0	0.0211	0.0176	0.0056	0.0149	0.0248	0.016	0.0112	0.0155	0.0113	0.0228	0.0027	0.0163	0.0179	0.0139	0.0265	0.0359	0	0.0277	0.0157	0.0058	0.0089	0.0194	0.0167	0.0042	0.0324	0.0088	0.0496	0.0381	0.0071	0.0217	0.0074	0.0523
CASP9	761	ES	4:5:6:7	3.2	8	0	1	0.2829	0.0477	0.9154	1	0.9337	0.9407	0.9399	0.9795	0.9385	0.9803	0.9057	0.9501	0.9885	0.9845	0.9484	0.8655	0.9515	0.9734	1	0.9519	0.9215	0.9338	0.9335	0.9866	0.9021	0.937	0.9445	0.9738	0.9355	1	0.9552	0.9347	0.9662	1	0.9075	1	1	0.9868	0.9035	0.9729	0.9322	0.9738
CASP9	762	AD	3.2	3.1	4	0	1	0.0366	0.0034	0.9925	1	1	1	1	1	1	1	1	1	1	1	1	1	1	1	1	1	1	1	0.9822	1	1	1	1	1	1	1	1	1	1	1	1	1	1	1	1	1	1	1
DNAJC16	763	AT	13.3			0	1	0.2285	0.0369	0.0428	0.0123	0.0938	0.0747	0.0245	0.0383	0.0763	0.1446	0.1033	0.086	0.062	0.0219	0.1027	0.1017	0.0454	0.056	0.0377	0.0679	0.1291	0.0806	0.0758	0.0375	0.0908	0.1042	0.1033	0.0704	0.0607	0.0663	0.1083	0.0949	0.0311	0.0676	0.0785	0.1214	0.1042	0.1325	0.1003	0.0486	0.0686	0.0531
DNAJC16	764	AT	16			0	1	0.0992	0.0125	0.0198	0.0409	0.0374	0.0337	0.0346	0.0319	0.0211	0.0241	0.0322	0.0197	0.0175	0.0182	0.0299	0.0381	0.0031	0.0166	0.0266	0.0184	0.0286	0.0246	0.0378	0.0156	0.0227	0.0231	0.0196	0.0259	0.0168	0.0409	0.0345	0.0223	0.0114	0.0492	0.0261	0.0227	0.0333	0.0087	0.0208	0.0307	0.033	0.03
DNAJC16	765	AT	15			0	1	0.2754	0.0408	0.9375	0.9468	0.8688	0.8916	0.941	0.9298	0.9026	0.8313	0.8645	0.8943	0.9205	0.96	0.8674	0.8602	0.9514	0.9275	0.9357	0.9137	0.8423	0.8949	0.8864	0.9469	0.8865	0.8727	0.8771	0.9037	0.9225	0.8928	0.8572	0.8828	0.9575	0.8833	0.8954	0.8559	0.8624	0.8588	0.8789	0.9206	0.8984	0.9169
DNAJC16	766	AD	13.2	13.1	14	0	0.9109	0.3156	0.0455	0.0828	0.0592	0	0	0.0714	0.0305	0.071	0	0	0.086	0	0.0702	0	0	0	0	0.0151	0.1291	0	0	0	0.1874	0	0	0	0	0	0	0	0	0	0	0	0	0	0	0.0997	0	0	0
PLEKHM2	767	ES	7	6	8	0	1	0.6654	0.1242	0.8546	0.9049	0.8279	0.8947	0.8254	0.8885	0.6295	0.6872	0.4946	0.74	0.7173	0.8908	0.8313	0.7225	0.8805	0.8919	0.8787	0.7016	0.6272	0.8471	0.7137	0.632	0.6381	0.8042	0.7432	0.6109	0.8499	0.8664	0.8163	0.6928	0.7332	0.5911	0.8845	0.7124	0.7092	0.7663	0.4002	0.8277	0.6561	0.6767
FBLIM1	768	AP	5.1			0	0.9891	0.5427	0.0963	0.0318	0	0.0441	0	0.1069	0	0	0.2288	0.0501	0	0	0	0.0464	0.1621	0.0551	0	0	0.0706	0.0612	0.049	0	0	0	0	0	0.0542	0.0694	0.2602	0.1457	0.0806	0.0686	0.1234	0	0.3364	0.089	0	0.1607	0	0.044	0
FBLIM1	769	AP	3			0	0.9891	0.9688	0.2161	0.6125	0.8133	0.2356	0.7492	0.8931	0.5284	0.4535	0.4513	0.18	0.7492	0.5932	0.5887	0.7374	0.6113	0.3802	0.5704	0.5734	0.6662	0.4542	0.6084	0.5961	0.8255	0.4535	0.7439	0.3162	0.4656	0.6882	0.6792	0.7863	0.2806	0.9154	0.8421	0.7134	0.6636	0.4545	0.8159	0.7644	0.5665	0.587	0.9163
FBLIM1	771	AP	1			0	0.9891	0.9688	0.2236	0.3557	0.1867	0.7202	0.2508	0	0.4716	0.5465	0.3199	0.7699	0.2508	0.4068	0.4113	0.2162	0.2267	0.5647	0.4296	0.4266	0.2632	0.4846	0.3426	0.4039	0.1745	0.5465	0.2561	0.6838	0.4802	0.2425	0.0606	0.0679	0.6388	0.016	0.0345	0.2866	0	0.4564	0.1841	0.0749	0.4335	0.369	0.0837
FBLIM1	772	AT	11			0	1	0.4263	0.0606	0.7941	0.7675	0.7415	0.7123	0.8559	0.6823	0.8066	0.8168	0.7713	0.7746	0.7449	0.7406	0.8491	0.7959	0.8718	0.7493	0.7131	0.8452	0.7343	0.7581	0.738	0.7737	0.6952	0.7753	0.7312	0.7979	0.8281	0.6676	0.8733	0.756	0.8374	0.8463	0.7271	0.7738	0.7424	0.7648	0.779	0.7484	0.8149	0.7622
FBLIM1	773	AT	9.2			0	1	0.4263	0.0606	0.2059	0.2325	0.2585	0.2877	0.1441	0.3177	0.1934	0.1832	0.2287	0.2254	0.2551	0.2594	0.1509	0.2041	0.1282	0.2507	0.2869	0.1548	0.2657	0.2419	0.262	0.2263	0.3048	0.2247	0.2688	0.2021	0.1719	0.3324	0.1267	0.244	0.1626	0.1537	0.2729	0.2262	0.2576	0.2352	0.221	0.2516	0.1851	0.2378
FBLIM1	774	ES	06:07:00	5.2	8	0	1	0.1167	0.0163	0.9775	0.9868	0.9679	1	1	1	0.9758	1	0.9729	1	1	1	1	0.9851	0.9822	0.9858	0.9512	1	0.9613	1	0.9905	0.9579	0.952	0.9472	0.9702	0.9799	0.9778	1	1	0.9869	0.9948	0.9976	0.9779	0.9379	1	0.9913	0.9703	0.9662	0.9952	1
FBLIM1	775	AA	4.1	3	4.2	1	0.9655	0.6409	0.0945	0.4382	0.4731	0.2745	0.4678	0.5422		0.4744	0.4482	0.5274	0.4604	0.6031	0.4037	0.3876	0.5393	0.4976	0.2903	0.293	0.4606	0.5816	0.4673	0.4916	0.4232	0.6171	0.3626	0.3424	0.4395	0.5666	0.5542	0.4255	0.4532	0.4091	0.4304	0.386	0.2249	0.4448	0.3386	0.392	0.3453	0.4326	0.4916
ZBTB17	778	AA	14.1	13	14.2	0	0.9982	0.2562	0.0419	0.0765	0.0917	0.139	0.0719	0.0704	0.0647	0.0622	0.1874	0.0711	0.0858	0.018	0.0972	0.1727	0.1152	0.0776	0.0701	0.1138	0.0943	0.0656	0.1144	0.0429	0.0843	0.1588	0.0388	0.1012	0.1269	0.049	0.1002	0.1493	0.0375	0.084	0.0757	0.1351	0.0453	0.0704	0.1066	0.0699	0.1008	0.1162	0.095
ZBTB17	779	RI	9.2	9.1	9.3	0	0.9964	0.4803	0.0917	0.1834	0.2115	0.1234	0.2096	0.1759	0.1005	0.1794	0.1052	0.123	0.1022	0.1517	0.1433	0.2945	0.0857	0.1806	0.2719	0.1619	0.2556	0.2115	0.132	0.2347	0.1442	0.2363	0.3411	0.1697	0.2922	0.2733	0.32	0.0896	0.2083	0.1258	0.2427	0.2482	0.2902	0.2974	0.1909	0.1517	0.132	0.1329	0.3402
ZBTB17	780	AA	5.1	4	5.2	0	0.9836	0.2308	0.0361	0.0136	0.0741	0.0206	0	0.0415	0.1304	0.0385	0.031	0.0569	0.0541	0.0196	0.0678	0.0609	0	0.0342	0.0702	0.0698	0.0777	0.0876	0	0.0559	0.0404	0.0138	0.0336	0.0541	0.0476	0.0517	0.0268	0.0351	0.0329	0.0514	0.0637	0.058	0	0.0541	0.0533	0.0741	0.1096	0.0418	0.0816
ZBTB17	782	ES	4	3	5.2	0	0.9982	0.1256	0.0238	1	0.9003	0.9616	1	1	0.9739	0.898	0.9402	0.9661	0.9779	0.9494	1	0.9623	1	0.9941	0.9876	0.9626	1	0.9539	0.9468	1	0.9788	0.9882	0.9806	0.9754	0.9885	1	0.9783	0.9839	0.9729	0.9809	0.9519	0.9724	1	1	0.9827	1	0.8954	0.9732	0.9353
ZBTB17	784	ES	3	2	4	0	1	0.1426	0.0224	0.9767	0.959	0.9854	1	1	0.9758	0.9426	1	0.9714	0.9741	1	1	0.9526	0.9629	0.9933	0.9812	1	1	1	1	1	0.973	0.9672	0.9129	1	0.986	0.9859	1	1	1	0.9899	0.9585	1	1	0.9843	0.9377	0.9691	0.9673	0.9834	0.966
HSPB7	787	AT	3			0	0.98	0.3756	0.0196	0	0	0	0	0	0	0	0	0	0	0	0	0	0	0	0	0	0	0	0	0	0	0	0	0	0	0	0	0	0	0	0	0	0	0	0	0	0	0	0
HSPB7	788	AT	5			0	0.98	0.3756	0.0196	1	1	1	1	1	1	1	1	1	1	1	1	1	1	1	1	1	1	1	1	1	1	1	1	1	1	1	1	1	1	1	1	1	1	1	1	1	1	1	1
SZRD1	802	RI	5.2	5.1	5.3	0	1	0.0072	0.0008	1	1	0.9973	1	1	1	1	1	1	1	0.9976	1	1	1	1	1	1	1	1	1	1	1	1	1	1	1	1	1	1	1	1	1	1	1	1	1	1	0.9958	1	1
SZRD1	803	AA	4.1	3	4.2	0	1	0.5619	0.076	0.7074	0.6486	0.8487	0.6049	0.5816	0.8257	0.7295	0.6121	0.5851	0.6898	0.6738	0.7655	0.6286	0.7838	0.6065	0.7769	0.7125	0.6454	0.6989	0.6653	0.5001	0.5154	0.7519	0.5393	0.7437	0.716	0.6524	0.7303	0.7358	0.7019	0.5645	0.6223	0.7437	0.7747	0.6506	0.6977	0.7316	0.5752	0.6007	0.7364
SZRD1	804	ES	2	1	3	0	0.9909	0.0442	0.0078	0.0038	0.0043	0.007	0	0	0.0175	0	0.0064	0.0052	0	0.0047	0.0074	0	0.0064	0	0.0083	0	0	0	0.021	0.0237	0	0.0053	0	0	0.0129	0.0067	0.0142	0.0099	0	0.0101	0.0033	0	0	0.0037	0.0074	0.0057	0	0	0.0129
SZRD1	805	ES	02:03:00	1	4.1	0	1	0.024	0.0038	0.0017	0.0027	0.0029	0	0	0.0108	0	0.0023	0.0013	0	0.0021	0.0057	0	0.0032	0	0.0055	0	0	0	0.0146	0.007	0	0.0028	0	0	0.0095	0.0022	0.0077	0.0051	0	0.0037	0.0015	0	0	0.0018	0.0025	0.0031	0	0	0.0085
SZRD1	806	ES	3	1	4.1	0	1	0.4617	0.083	0.3754	0.4602	0.3367	0.4849	0.25	0.456	0.4616	0.3198	0.243	0.3734	0.3742	0.5044	0.3131	0.3774	0.3915	0.4952	0.42	0.3678	0.4286	0.4811	0.2737	0.2797	0.4245	0.3903	0.6032	0.5216	0.3131	0.397	0.4264	0.4271	0.3401	0.3613	0.4444	0.3977	0.3811	0.3196	0.3865	0.3901	0.3928	0.4523
SZRD1	807	ES	00:03:04.100000	1	4.2	0	0.9964	0.0271	0.0043	0.0021	0.0037	0.0023	0	0	0.0132	0	0.0028	0.0016	0	0.0021	0.0046	0	0.0043	0	0.0072	0	0	0	0.0167	0.0122	0	0.0034	0	0	0.009	0.0028	0.0135	0.0064	0	0.0036	0.0014	0	0	0.0018	0.003	0.0033	0	0	0.009
SZRD1	808	ES	00:03:04.100000	1	4.2	0	1	0.6065	0.0904	0.4269	0.5388	0.2886	0.4795	0.2938	0.5035	0.477	0.36	0.2858	0.4529	0.3791	0.4461	0.3806	0.4429	0.4103	0.5597	0.5358	0.3497	0.4912	0.5119	0.3957	0.3008	0.4636	0.336	0.558	0.5027	0.367	0.5323	0.4789	0.4921	0.329	0.3388	0.4125	0.4118	0.383	0.3598	0.3928	0.4213	0.4098	0.4641
SZRD1	809	AA	4.1	1	4.2	0	1	0.3794	0.0547	0.5505	0.5752	0.4412	0.4916	0.5522	0.5445	0.5125	0.5417	0.5519	0.5785	0.5021	0.4388	0.5712	0.5644	0.5165	0.5615	0.6116	0.4773	0.5598	0.5277	0.6319	0.5225	0.5365	0.4385	0.4507	0.4781	0.557	0.6308	0.5499	0.5621	0.4846	0.4723	0.4645	0.5116	0.4989	0.5417	0.5036	0.5294	0.5147	0.5089
SZRD1	810	ES	02:03:00	1	4.2	0	0.9964	0.0119	0.002	0.0009	0.002	0.0004	0	0	0.0027	0	0.0018	0.0011	0	0.001	0.0014	0	0.0011	0	0.002	0	0	0	0.0083	0.0119	0	0.0011	0	0	0.0035	0.0014	0.0049	0.0023	0	0.0027	0.0008	0	0	0.001	0.0013	0.0012	0	0	0.0032
SZRD1	811	ES	3	1	4.2	0	1	0.6383	0.0758	0.2334	0.3847	0.0667	0.3728	0.2282	0.1746	0.2504	0.2605	0.219	0.2689	0.226	0.196	0.264	0.178	0.3084	0.2651	0.3152	0.226	0.2913	0.3426	0.3928	0.2855	0.2198	0.2993	0.3007	0.2837	0.2338	0.2935	0.2458	0.289	0.2721	0.2351	0.193	0.1675	0.2477	0.1939	0.19	0.347	0.3132	0.2345
NECAP2	821	RI	9.3	9.2	9.4	0	1	0.0378	0.0071	0.9819	0.9931	0.9706	0.9847	0.9974	0.9914	0.983	0.981	0.9886	0.9851	0.9802	0.9833	0.9855	0.9898	0.9898	0.985	0.9951	0.9874	0.9862	0.9909	0.9756	0.9871	0.9889	0.9822	0.9734	0.9932	0.9777	0.9924	0.9686	0.9795	0.9889	0.9757	0.9905	0.9811	0.9864	0.9895	0.9766	0.9721	0.9893	0.9813
NECAP2	822	RI	9.2:9.3:9.4	9.1	9.5	0	1	0.036	0.0061	0.9865	1	0.9681	0.9929	0.9903	0.9969	0.9915	0.9924	0.9941	0.9947	0.9911	0.9888	0.9933	0.9898	0.988	0.9867	0.9831	0.994	0.9866	0.9872	0.9885	0.9843	0.9906	0.9918	0.9881	1	0.9937	0.9897	0.9958	0.986	0.9857	0.9886	0.9834	0.9811	0.9913	0.991	0.9819	0.994	0.9923	0.9809
NECAP2	823	ES	9.2:9.4	9.1	9.5	0	0.96	0.8653	0.1741	0.5919	1	0.5063	0.7038	0.2398	0.75	0.693	0.7323	0.6782	0.7351	0.7115	0.6149	0.7143	0.5208	0.492	0.5689	0.2403	0.7263	0.5599	0.4497	0.7053	0.4708	0.6036	0.7202	0.7248	1	0.8082	0.4591	0.895	0.6333	0.4635	0.691	0.3775	0.519	0.6309	0.5442	0.6037	0.836	0.5978	0.5205
NECAP2	824	ES	8	7	9.1	0	1	0.075	0.0123	0.9878	0.9802	0.9679	0.9735	0.9833	0.9671	0.9782	0.9732	0.9912	0.951	0.9915	0.9848	0.9713	0.9642	0.9922	0.9719	0.9845	0.9896	0.9632	0.9693	0.9649	0.991	0.9848	0.9753	0.9725	0.9576	0.9899	0.984	0.9527	0.9783	0.9646	0.9737	0.9889	0.962	0.9962	0.9744	0.9513	0.9832	0.981	0.982
NECAP2	825	ES	6	5	7	0	1	0.1149	0.0155	0.0409	0.0154	0.0483	0	0.0041	0.0075	0.0104	0.0301	0.0099	0.0154	0.0198	0.0078	0.014	0.0086	0.0276	0.0089	0.005	0.0133	0.0168	0.004	0.0146	0.0196	0.0268	0.0106	0.0246	0.0038	0.0143	0.0309	0.0174	0.0316	0.0437	0.0176	0.0086	0.0052	0.0392	0.0325	0.0303	0.0246	0.0028	0.0435
NECAP2	826	ES	4	3	5	0	1	0.0127	0.0016	0.9968	1	0.9948	1	1	1	0.9939	1	0.9983	1	1	1	1	1	1	1	1	1	1	1	1	1	1	1	1	0.9955	1	1	1	1	1	1	1	1	1	0.9962	1	1	1	1
NECAP2	827	ES	2	1.2	3	0	1	0.0183	0.003	1	1	0.992	1	1	1	0.9911	0.9931	0.9949	1	1	1	1	1	1	1	1	1	0.9946	1	1	1	0.9927	1	1	1	0.9949	0.9896	1	1	0.9952	1	0.9923	1	0.9951	1	1	1	1	0.9933
NECAP2	828	AD	1.2	1.1	2	0	0.9982	0.0266	0.0053	1	0.9935	1	1	1	1	1	1	0.9968	1	1	1	1	1	1	0.9971	0.9887	1	0.9938	0.9916	1	1	0.9813	1	0.9856	1	0.9871	1	0.9876	0.9883	1	1	1	1	0.9938	0.9947	0.9837	0.985	1	1
NBPF1	830	AP	1			0	0.9782	0.8609	0.1314	0.7753	0.6079	0.6868	0.5043	0.6428	0.6428	0.7271	0.6774	0.4921	0.6012	0.5985	0.5548	0.8224	0.691	0.7398	0.7129	0.6291	0.4537	0.7822	0.6508	0.7078	0.7291	0.7497	0.6807	0.6176	0.609	0.5673	0.7115	0.7178	0.631	0.7542	0.7364	0.6133	0.4468	0.7046	0.748	0.7441	0.7618	0.5637	0.7183
NBPF1	831	AP	3			0	0.9782	0.8609	0.1314	0.2247	0.3921	0.3132	0.4957	0.3572	0.3572	0.2729	0.3226	0.5079	0.3988	0.4015	0.4452	0.1776	0.309	0.2602	0.2871	0.3709	0.5463	0.2178	0.3492	0.2922	0.2709	0.2503	0.3193	0.3824	0.391	0.4327	0.2885	0.2822	0.369	0.2458	0.2636	0.3867	0.5532	0.2954	0.252	0.2559	0.2382	0.4363	0.2817
NBPF1	835	ES	25	24	26	0	0.9945	0.336	0.0552	0.9901	0.9161	1	0.9384	0.9202	0.811	0.934	1	0.9881	1	0.9779	0.9786	0.9463	0.9635	0.9742	0.9367	0.9621	0.8705	0.8645	0.9065	0.9599	1	0.8998	0.9685	1	0.9785	0.9462	1	0.9807	0.9776	0.9873	0.9151	0.9167	0.9347	0.9675	0.9852	0.9683	0.9848	0.9277	0.9567
NBPF1	836	ES	10:11:12:13:14:15	9	16	0	0.9982	0.6665	0.101	0.8623	0.7159	0.7262	0.9224	0.6201	0.806	0.7349	0.648	0.7894	0.7221	0.7979	0.9152	0.872	0.9277	0.7289	0.809	0.731	0.6255	0.8741	0.7618	0.7428	0.8623	0.7773	0.7802	0.8199	0.8554	0.7858	0.7109	0.8135	0.8165	0.8155	0.8134	0.7823	0.5837	0.8257	0.8399	0.8517	0.8404	0.848	0.8463
MFAP2	839	AA	3.1	2	3.2	0	0.9964	0.3645	0.0487	0.8835	0.8855	0.8782	0.8969	0.8869	0.8476	0.8131	0.878	0.9253	0.8515	0.8661	0.9677	0.8574	0.9355	0.8867	0.8796	0.8332	0.8665	0.9187	0.8557	0.8684	0.891	0.9063	0.8978	0.8366	0.8796	0.8556	0.8845	0.9099	0.8904	0.8221	0.8094	0.9063	0.8501	0.8668	0.8735	0.9063	0.8039	0.9141	0.8443
ATP13A2	840	ES	28	27	29	0	0.9982	0.1674	0.0263	0.9496	0.9307	0.9771	0.9692	0.9393	0.9851	0.942	0.9728	0.9403	0.9891	0.9733	0.9738	0.909	0.9597	0.9745	0.9292	0.9827	0.9921	0.9725	0.9749	0.9488	0.9496	0.9583	0.8961	0.9791	0.9609	0.9705	0.962	0.9622	0.9649	0.9692	0.9266	0.9701	0.9833	0.9163	0.8843	1	0.962	0.9746	0.9264
ATP13A2	841	ES	22	21	23	0	0.9982	0.1082	0.0137	0.9856	0.8957	0.9946	0.9497	0.9939	0.9673	0.9716	1	1	1	1	0.9841	0.9914	0.9931	1	0.9818	0.981	1	0.9886	0.9942	1	0.9867	1	1	0.9916	0.9836	0.9909	0.9924	1	0.9938	1	0.9876	1	1	0.9858	1	1	0.9934	0.9942	0.9887
ATP13A2	842	AD	5.2	5.1	6	0	0.9909	0.6355	0.0871	0.5202	0.4254	0.4548	0.5512	0.4298	0.6308	0.6752	0.6844	0.5943	0.5512	0.5617	0.5671	0.7193	0.6308	0.5526	0.6072	0.5665	0.5262	0.5541	0.5541	0.5084	0.569	0.5118	0.6811	0.5813	0.5471	0.6916	0.5356	0.5548	0.6134	0.6767	0.6231	0.6216	0.6659	0.5489	0.4792	0.7193	0.6811	0.5671	0.5186
PADI2	843	AT	11.2			0	1	0.3235	0.0325	0	0.011	0	0	0.0274	0.0215	0.0145	0	0.0042	0.0785	0.0055	0.0306	0	0	0	0.0097	0.0582	0.015	0.0069	0	0	0	0	0	0	0	0.0229	0	0.0112	0.0101	0.0474	0	0	0.0301	0.0033	0.0526	0.0645	0.0624	0.0091	0.0091
PADI2	844	AT	16			0	1	0.3235	0.0325	1	0.989	1	1	0.9726	0.9785	0.9855	1	0.9958	0.9215	0.9945	0.9694	1	1	1	0.9903	0.9418	0.985	0.9931	1	1	1	1	1	1	1	0.9771	1	0.9888	0.9899	0.9526	1	1	0.9699	0.9967	0.9474	0.9355	0.9376	0.9909	0.9909
PADI2	846	ES	05:06:00	4	7	0	0.7709	0.019	0.0012		1	1	1	1	1	1		1	1	1	1	1	1	1	1	1	1	1	1	1	1	1			1	1	1	1	1	1	1	1		1	1	1		1	1
PADI4	851	AT	17			0	0.9945	0.8864	0.203	0.1092	0.7976	0.1931	0.669	0.2544	0.807	0.0446	0.1269	0.0578	0.1906	0.144	0.6564	0.2111	0.2074	0.1157	0.5209	0.4646	0.1476	0.0239	0.0351	0.1024	0.0175	0.2074	0.3214	0	0.177	0.5137	0.0967	0.1687	0.2061	0.0719	0.3366	0.6655	0.2721	0.0333	0.0914	0.0634	0.1017	0.0457	0.2716
PADI4	852	AT	4			0	0.9945	0.8864	0.203	0.8908	0.2024	0.8069	0.331	0.7456	0.193	0.9554	0.8731	0.9422	0.8094	0.856	0.3436	0.7889	0.7926	0.8843	0.4791	0.5354	0.8524	0.9761	0.9649	0.8976	0.9825	0.7926	0.6786	1	0.823	0.4863	0.9033	0.8313	0.7939	0.9281	0.6634	0.3345	0.7279	0.9667	0.9086	0.9366	0.8983	0.9543	0.7284
RCC2	853	AP	2.1			0	0.9945	0.5056	0.0805	0.1088		0.0992	0	0.2783	0	0.0934	0.118	0.1988	0.0756	0.1719	0.1443	0.1115	0.2212	0.0735	0.0618	0.1011	0.0352	0.1394	0.1163	0.2259	0.2235	0.0671	0.093	0.0817	0	0.0503	0.0554	0.104	0.1616	0.062	0.0974	0.1525	0.2307	0.2771	0.2071	0.1037	0.1704	0.0268	0.1541
RCC2	854	AP	1			0	0.9945	0.5056	0.0805	0.8912		0.9008	1	0.7217	1	0.9066	0.882	0.8012	0.9244	0.8281	0.8557	0.8885	0.7788	0.9265	0.9382	0.8989	0.9648	0.8606	0.8837	0.7741	0.7765	0.9329	0.907	0.9183	1	0.9497	0.9446	0.896	0.8384	0.938	0.9026	0.8475	0.7693	0.7229	0.7929	0.8963	0.8296	0.9732	0.8459
ARHGEF10L	855	AP	1			0	0.8018	1	0.2222	0.7854	0.0893	0.9107	0.0924	0.1356	0.1744	0.5112	0.4396	0.5406	0.6467	0.2356	0.1173	0.4247	0.3256	0.9165	0.1339	0.155	0.4278	0.2535	0.5168	0.245	0.7445	0.3704	0.7583		0.7463	0.4632	0.1796	0.402	0.4396	0.329	0.2388	0.2154		0.5152	0.4996	0.5735	0.7018	0.2864	0.2719
ARHGEF10L	857	AP	4.1			0	0.8018	0.3815	0.059	0	0	0	0	0	0	0	0	0	0	0	0	0	0	0	0	0.0419	0.2313	0.0274	0	0	0	0	0		0	0	0	0	0	0	0	0		0	0	0	0	0	0
ARHGEF10L	858	AP	10			0	0.8018	1	0.2261	0.2146	0.9107	0.0893	0.9076	0.8644	0.8256	0.4888	0.5604	0.4594	0.3533	0.7644	0.8827	0.5753	0.6744	0.0835	0.8661	0.803	0.3409	0.7191	0.4832	0.755	0.2555	0.6296	0.2417		0.2537	0.5368	0.8204	0.598	0.5604	0.671	0.7612	0.7846		0.4848	0.5004	0.4265	0.2982	0.7136	0.7281
ARHGEF10L	859	AT	22			0	1	0.2905	0.0401	0.0611	0.0351	0.0441	0.0833	0.0288	0.0571	0.0411	0.1029	0.0943	0.1155	0.0884	0.1202	0.0283	0.0501	0.0654	0.0631	0.0637	0.0679	0.0933	0.0714	0.0978	0.091	0.0764	0.0641	0.0559	0.0899	0.142	0.1747	0.015	0.0848	0.0949	0.0574	0.0499	0.0988	0.045	0.0678	0.0451	0.0594	0.0768	0.0728
ARHGEF10L	860	AT	30			0	1	0.0941	0.0066	0	0.0423	0	0	0	0	0	0.0206	0	0	0	0.0093	0	0	0	0.0046	0	0	0	0	0	0	0	0	0	0	0	0	0	0	0	0	0	0	0	0	0	0	0	0
ARHGEF10L	861	AT	32			0	1	0.2905	0.0409	0.9389	0.9226	0.9559	0.9167	0.9711	0.9429	0.9589	0.8764	0.9057	0.8845	0.9116	0.8704	0.9717	0.9499	0.9346	0.9323	0.9363	0.9321	0.9067	0.9286	0.9022	0.909	0.9236	0.9359	0.9441	0.9101	0.858	0.8253	0.985	0.9152	0.9051	0.9426	0.9501	0.9012	0.955	0.9322	0.9549	0.9406	0.9232	0.9272
ARHGEF10L	862	ES	18	17	19	0	0.9564	0.7966	0.1666	1	0.4097	1	0.4028	0.3816	0.5875	0.9472	0.7193	0.805	0.8245	0.5743	0.5562	0.5617	0.861	0.9119	0.4405	0.4249	0.8567	0.6372	0.7193	0.6103	0.8245	0.5447	0.9484	1	0.9174	0.6508	0.5969	0.8886	0.8724	0.7107	0.5507	0.2506	0.7936	0.8881	0.8538	0.9647	0.8288	0.7094	0.7401
ARHGEF10L	863	ES	14:15:00	13	16	0	0.9982	0.1842	0.012	1	1	0.9744	1	1	1	1	1	1	1	1	1	1	1	1	1	1	1	1	1	1	1	1	1	1	1	1	1	1	1	1	1	1	1	1	1	1	1	1	1
ARHGEF10L	864	ES	8	7	9	0	0.82	0.1048	0.0137	0.0221	0	0.0176	0	0	0		0	0	0	0	0	0	0	0.0059	0	0	0	0	0	0	0	0	0	0.0376	0.0345	0	0	0	0	0.0578	0.0162	0		0	0	0		0.02	0
ALDH4A1	868	AP	1			0	0.9182	0.4292	0.0496	1	0.8231	1	1	1	1	1	1	1		1		1	1	0.9929	1	1	1	1	0.8069	1	1	0.941	1	0.9629	1	1	0.9523	1	1	1	0.9841	1	1	1	0.9523	1	1	1	0.9677
ALDH4A1	869	AP	2			0	0.9182	0.4292	0.0496	0	0.1769	0	0	0	0	0	0	0		0		0	0	0.0071	0	0	0	0	0.1931	0	0	0.059	0	0.0371	0	0	0.0477	0	0	0	0.0159	0	0	0	0.0477	0	0	0	0.0323
ALDH4A1	870	RI	16.2	16.1	16.3	0	1	0.0537	0.0075	1	1	1	1	1	1	0.9938	1	0.9949	1	1	1	1	1	0.995	1	1	1	1	1	1	0.9865	1	0.9851	0.99	0.9836	1	0.9928	0.9728	1	0.9946	0.9956	1	1	1	1	1	1	0.9923	0.9791
ALDH4A1	871	ES	13	12	14	0	1	0.2812	0.0454	1	1	0.9593	0.9549	1	0.9701	0.9547	0.8287	1	0.9517	0.8086	1	0.9453	1	0.9943	1	0.9223	1	0.9669	0.9392	1	0.9742	0.9886	1	0.9471	0.8796	0.9545	0.8864	0.946	0.9301	0.9384	0.9941	1	0.8893	0.9395	0.9786	0.8946	0.9659	0.8936	0.8851
UBR4	872	AP	74.1			0	1	0.8002	0.0995	0.3011	0.3277	0.3072	0.3774	0.2521	0.3442	0.4589	0.2929	0.261	0.3351	0.2492	0.3695	0.2468	0.2105	0.0287	0.2586	0.2201	0.2556	0.2712	0.2314	0.2069	0.1943	0.1228	0.2594	0.2968	0.1678	0.1882	0.3154	0.1634	0.1807	0.1326	0.2044	0.2734	0.204	0.2094	0.2082	0.2659	0.1874	0.2169	0.1413
UBR4	875	AP	103.1			0	1	0.8658	0.1283	0.138	0.163	0.0928	0.1754	0.1562	0.1734	0.1896	0.137	0.1454	0.1635	0.1438	0.1758	0.0986	0.0805	0.8897	0.2955	0.1321	0.174	0.1482	0.155	0.0805	0.0758	0.0799	0.2364	0.1809	0.1329	0.1083	0.1685	0.2949	0.176	0.1691	0.1696	0.1191	0.1679	0.1658	0.1312	0.1548	0.1526	0.1654	0.1706
UBR4	876	AP	86.1			0	1	0.7537	0.1281	0.3805	0.3784	0.399	0.3698	0.2471	0.3549	0.2469	0.4566	0.4521	0.3295	0.4436	0.2657	0.5368	0.3894	0.0582	0.3358	0.4067	0.389	0.2715	0.4997	0.6042	0.4996	0.7083	0.3056	0.4297	0.561	0.6109	0.4011	0.1821	0.466	0.357	0.3175	0.4073	0.4548	0.4164	0.3125	0.3463	0.4463	0.345	0.617
UBR4	877	AP	1			0	1	0.6777	0.1226	0.1804	0.1308	0.201	0.0774	0.3446	0.1275	0.1045	0.1135	0.1414	0.1719	0.1634	0.189	0.1178	0.3196	0.0233	0.1101	0.2411	0.1814	0.309	0.1139	0.1084	0.2303	0.0891	0.1986	0.0926	0.1382	0.0926	0.115	0.3597	0.1773	0.3413	0.3085	0.2002	0.1733	0.2084	0.3481	0.233	0.2137	0.2727	0.0711
UBR4	878	AT	107			0	1	0.0994	0.0133	0.9587	0.9571	0.9322	0.9425	0.9716	0.9476	0.9738	0.972	0.9606	0.9549	0.9594	0.949	0.9691	0.9512	0.9951	0.9514	0.9529	0.942	0.941	0.9588	0.9459	0.9515	0.9615	0.9615	0.9564	0.9406	0.9687	0.9465	0.9632	0.9635	0.9574	0.929	0.9297	0.9773	0.9233	0.9454	0.9542	0.9581	0.9304	0.9724
UBR4	879	AT	78.6			0	1	0.0994	0.0133	0.0413	0.0429	0.0678	0.0575	0.0284	0.0524	0.0262	0.028	0.0394	0.0451	0.0406	0.051	0.0309	0.0488	0.0049	0.0486	0.0471	0.058	0.059	0.0412	0.0541	0.0485	0.0385	0.0385	0.0436	0.0594	0.0313	0.0535	0.0368	0.0365	0.0426	0.071	0.0703	0.0227	0.0767	0.0546	0.0458	0.0419	0.0696	0.0276
UBR4	880	ES	105	104	106	0	1	0.0227	0.0044	0.0068	0	0	0.0052	0	0	0	0.0029	0.0083	0	0.0104	0.012	0.0081	0	0.0031	0.0083	0.0047	0	0.0077	0.0027	0	0.0095	0.0022	0.0066	0	0.0085	0.0151	0.0039	0	0.0031	0.0063	0	0.0098	0	0.0211	0.0132	0	0	0.0092	0.002
UBR4	881	ES	94	93	95	0	1	0.0802	0.0153	0.9947	0.9517	0.9781	0.9492	0.9677	0.97	0.9771	0.9887	0.9892	0.9708	0.9911	0.9897	1	0.9816	0.9758	0.9781	1	0.9783	0.9885	0.9876	1	0.983	0.9512	0.9843	1	0.9955	0.9941	0.9587	0.9921	0.9639	0.9915	0.9813	0.9856	0.982	0.9894	1	0.9847	0.9676	0.9938	0.9799
UBR4	882	ES	90	89	91	0	1	0.0229	0.002	0.9928	1	1	1	1	1	1	1	1	1	1	1	1	1	1	1	1	1	1	1	1	1	1	1	1	1	1	1	1	1	1	1	1	1	1	1	1	1	1	1
UBR4	883	RI	78.4	78.3	78.5	0	0.9764	0.2447	0.0296	0.0282	0.0051	0.0376	0.0417	0.0111	0.0079	0.0216	0.0066	0.0091	0.0439	0.0347	0.0226	0.0164	0.0031	0.0277	0.0142	0	0.0198	0.0303	0.0234	0.0447	0.0729	0.0244	0.0263	0.0053	0.0595	0.1115	0.0056	0.0083	0.0234	0.0109	0.0078	0.0095	0.0874	0.034	0.049	0.0115	0.043	0.0548	0.0592
UBR4	884	RI	78.2	78.1	78.3	0	0.9782	0.0288	0.003	0	0	0	0	0	0	0	0	0	0.0146	0	0	0	0	0	0	0	0	0	0	0	0	0.0069	0	0	0.0041	0	0	0	0	0	0.0054	0	0	0.0059	0	0	0	0	0
UBR4	885	ES	60	59	61	0	0.9855	0.3197	0.0502	0.9678	0.9774	0.8863	0.9603	0.9727	1	0.9669	0.941	0.939	1	0.9359	1	0.9588	1	0.9068	0.945	0.9626	1	0.9538	0.9068	0.9445	0.9333	0.9572	0.9339	0.9736	0.88	1	0.9034	0.974	0.8706	0.9383	0.9835	0.8997	1	0.9313	0.9508	0.9772	0.9213	0.953	0.9339
UBR4	886	ES	54	53	55	0	0.9527	0.5057	0.0735	0.1134	0.2131	0.1963	0.1457	0.136	0.1853	0.1853	0.1193	0.1378	0.1201	0.1134	0.0487	0.1331	0.1134	0.1981	0.1134	0.1066	0.1166	0.1116	0.1699	0.168	0.2602	0.1716	0.1407	0.1134	0.1603	0.1798	0.15	0.2496	0.1166	0.2309	0.1687	0.1074	0.5057	0.1056	0.0899	0.2097	0.1555	0.1293	0.033
UBR4	887	ES	50	49	51	0	0.88	0.1406	0.0192	0.017	0.0748	0	0.0294	0.0222	0	0.0307	0	0	0	0	0	0	0	0	0.0283	0	0	0	0	0.0222	0	0	0	0.0388	0.0241	0	0	0	0	0.0163	0	0		0	0.032	0.0216	0	0	0
EMC1	891	AA	10.1	9	10.2	0	0.9964	0.3907	0.0562	0.7831	0.8155	0.8079	0.7326	0.8923	0.8752	0.8084	0.836	0.8097	0.8131	0.783	0.9427	0.8617	0.8082	0.8061	1	0.78	0.7599	0.9466	0.8245	0.8688	0.8755	0.7922	0.8672	0.8915	0.7857	0.8619	0.8417	0.7786	0.8503	0.807	0.851	0.858	0.8487	0.8657	0.8236	0.817	0.7655	0.8354	0.831
EMC1	893	ES	3	2.1	4	0	1	0.1498	0.0135	0.9943	1	1	1	0.9908	1	0.9734	0.9916	1	1	0.9911	1	1	0.9916	1	1	1	1	1	0.9934	0.9867	1	1	0.986	0.9725	1	0.9896	0.9724	1	1	0.9869	0.9957	1	0.9864	0.9825	0.9943	1	0.9931	0.9841	0.9958
EMC1	894	AD	2.2	2.1	3	0	0.9964	0.2202	0.0187	0.0036	0.0092	0.0191	0.0199	0.0047	0.0142	0	0.0134	0.0032	0	0.0019	0.0252	0.0202	0	0.0076	0.0321	0.0188	0.0449	0.0134	0	0.0215	0.0063	0	0.0192	0.0139	0.0111	0.0056	0.0118	0.0183	0	0.0037	0.0037	0.0241	0.0118	0.0151	0.0086	0.0099	0.0183	0.0103	0
PQLC2	898	AA	4.1	3	4.2	0	1	0.4007	0.0717	0.7784	0.9395	0.7649	0.8161	0.8381	0.8256	0.7822	0.916	0.8455	0.8987	0.8725	0.9523	0.8554	0.7814	0.9582	0.8826	0.9263	0.925	0.9156	0.8522	0.7235	0.9047	0.8765	0.8221	0.8073	0.9517	0.9421	0.9726	0.7814	0.8883	0.8489	0.8514	0.9606	0.9221	0.8381	0.8221	0.9006	0.8381	0.8754	0.8569
PQLC2	899	ES	2	1.3	3	0	1	0.2699	0.0292	0.9342	0.9589	1	1	1	0.9743	0.9741	0.9842	1	0.9271	0.9767	1	0.9784	0.9642	0.9715	0.9582	0.9596	1	0.9821	0.9424	1	0.9897	0.9837	0.9751	0.9305	0.9893	0.9857	0.9825	0.9223	0.9808	0.985	0.9677	0.9374	0.9709	0.9834	0.975	0.9635	1	0.9702	0.9642
PQLC2	900	RI	1.2	1.1	1.3	0	0.9818	0.9811	0.1276	0.2129	0.2154	0.1008	0.0823	0.2189	0.5616	0.387	0.3578	0.1673	0.3331	0.1801	0.1612	0.2039	0.2614	0.2614	0.1439	0.1106	0.2207	0.2713	0.0929	0.2039	0.312	0.3284	0.4021	0.2648	0.3388	0.1807	0.3765	0.2319	0.5849	0.3446	0.2847	0.2399	0.1851	0.2101	0.2957	0.3934	0.263	0.3127	0.2237
CAPZB	901	AP	1			0	1	0.1344	0.0128	0.9961	0.9866	0.9917	0.9872	0.9872	0.9919	0.9978	0.9742	0.9767	0.9908	0.9906	0.9944	0.9856	0.9928	0.9911	0.9808	0.9952	0.9935	0.9878	0.9853	0.9788	0.9891	0.9838	0.9881	0.9798	0.9776	0.9914	0.9802	0.9946	0.99	0.9942	0.9925	0.9868	0.9874	0.9883	0.9915	0.9908	0.9916	0.9906	0.9856
CAPZB	902	AP	2			0	1	0.1344	0.0128	0.0039	0.0134	0.0083	0.0128	0.0128	0.0081	0.0022	0.0258	0.0233	0.0092	0.0094	0.0056	0.0144	0.0072	0.0089	0.0192	0.0048	0.0065	0.0122	0.0147	0.0212	0.0109	0.0162	0.0119	0.0202	0.0224	0.0086	0.0198	0.0054	0.01	0.0058	0.0075	0.0132	0.0126	0.0117	0.0085	0.0092	0.0084	0.0094	0.0144
CAPZB	903	AP	4.1			0	1	0	0	0	0	0	0	0	0	0	0	0	0	0	0	0	0	0	0	0	0	0	0	0	0	0	0	0	0	0	0	0	0	0	0	0	0	0	0	0	0	0	0
CAPZB	906	ES	11	10	12	0	1	0.1037	0.0147	0.0161	0.1037	0.0141	0.1021	0.0122	0.0641	0.0056	0.0116	0.0106	0.0132	0.0203	0.0541	0.0167	0.0066	0.0081	0.0419	0.0479	0.0118	0.0111	0.0192	0.0117	0.0092	0.0108	0.0103	0.01	0.0274	0.022	0.0194	0.0075	0.0146	0.0074	0.0197	0.0375	0.0069	0.0289	0.0167	0.005	0.0102	0.0138	0.0122
CAPZB	907	ES	10:11:00	9	12	0	0.9582	0.5362	0.1184	1	0.9764	0.8957	0.9755	0.9347	1	0.6128	0.8281	0.8718	1	1	1	1	1	1	0.9746	1	0.8837	0.689	0.9047	0.8737	0.8785	0.8146	1	0.5425	0.9326	1	0.8692	0.7765	0.6932	0.8259	0.7568	1	1	1	0.7533		1	0.8636	0.9205
CAPZB	908	ES	10	9	12	0	1	0.0067	0.001	1	0.9982	0.9989	0.9981	0.9994	1	0.9982	0.9984	0.9991	1	1	1	1	1	1	0.9993	1	0.9993	0.9976	0.999	0.9991	0.9993	0.9985	1	0.9955	0.9988	1	0.9987	0.9985	0.9962	0.9992	0.9962	1	1	1	0.9972	1	1	0.9989	0.9994
CAPZB	909	ES	3	1	4.2	0	1	0.0065	0.0006	0	0.0006	0.0003	0.0005	0.0004	0.0006	0	0	0.0006	0.0009	0	0.0005	0.0005	0.0003	0.0002	0.0004	0.0009	0	0	0.0003	0.0003	0.0004	0	0.0008	0	0.0008	0.0002	0	0.0003	0	0	0.0002	0.0008	0.0003	0.0002	0.0006	0.0004	0.0008	0.0004	0
NBL1	911	AP	1			0	0.9909	0.3745	0.0485	0	0.0246	0	0.008	0	0.0353	0.052	0.0144	0.0286	0	0.0268	0.0244	0.095	0.0435	0.0513	0.1103	0.0605	0.0116	0.0077	0.0424	0.0403	0.0141	0.0465	0.1033	0	0.0351	0.0351	0.0405	0.075	0.0506	0.0158	0.0409	0.0708	0.0623	0.0107	0.0376	0.0242	0.0439	0.0645	0.0567
NBL1	912	AP	2			0	0.9909	0.3745	0.0485	1	0.9754	1	0.992	1	0.9647	0.948	0.9856	0.9714	1	0.9732	0.9756	0.905	0.9565	0.9487	0.8897	0.9395	0.9884	0.9923	0.9576	0.9597	0.9859	0.9535	0.8967	1	0.965	0.965	0.9595	0.925	0.9494	0.9842	0.9591	0.9292	0.9377	0.9893	0.9624	0.9758	0.9561	0.9355	0.9433
TMCO4	913	AP	2			0	0.9636	0.7758	0.1291	0.2259	0.2683	0.4682	0.4106	0.1796	0.3606	0.3034	0.5989	0.5427	0.2135	0.4043	0.4988	0.2932	0.3767	0.2848	0.5042	0.3323	0.2932	0.166	0.1916	0.2803	0.5739	0.7027	0.3673	0.7133	0.3538	0.2667	0.2791	0.3323	0.509	0.5675	0.2265	0.5871	0.5544	0.3057	0.4655	0.3782	0.5226	0.2864	0.2821
TMCO4	914	AP	1			0	0.9636	0.7758	0.1291	0.7741	0.7317	0.5318	0.5894	0.8204	0.6394	0.6966	0.4011	0.4573	0.7865	0.5957	0.5012	0.7068	0.6233	0.7152	0.4958	0.6677	0.7068	0.834	0.8084	0.7197	0.4261	0.2973	0.6327	0.2867	0.6462	0.7333	0.7209	0.6677	0.491	0.4325	0.7735	0.4129	0.4456	0.6943	0.5345	0.6218	0.4774	0.7136	0.7179
TMCO4	915	RI	17.2	17.1	17.3	0	1	0.0547	0.0063	1	1	1	1	1	1	1	1	1	1	1	1	1	1	0.9665	1	0.9871	1	1	1	1	1	1	1	1	1	1	1	1	1	1	1	1	1	1	1	0.9763	1	1	0.9901
TMCO4	916	ES	11	10	12	0	0.9982	0.5417	0.0544	0.9085	1	1	0.9265	0.9598	0.9419	0.954	1	1	0.9654	0.9644	0.9769	0.8931	0.9292	0.9506	1	0.9373	0.8873	0.979	1	0.9256	0.9262	0.9659	0.9442	1	1	0.9782	1	0.9825	0.9584	1	0.9338	0.923	0.94	0.9838	0.9332	0.9558	0.9644	0.9748	0.9636
TMCO4	917	ES	3	1	4	1	0.8055	0.8259	0.1443	0.4339	0.4505	0.7034	0.5309	0.5815	0.4516	0.5131		0.5148	0.3451	0.4676	0.2654	0.3759	0.6484	0.5303	0.4245	0.5754	0.5369	0.3874	0.5282	0.417	0.5095	0.659	0.4039		0.5671	0.1692	0.1977	0.5754	0.2965		0.3917			0.5842	0.5897	0.6372		0.5754	0.453
VWA5B1	923	AT	15			0	1	0.4238	0.0503	1	0.8009	0.6975	0.9176	1	0.9643	1	1	1	1	0.9743	0.9768	0.9763	1	1	0.7573	0.8092	0.9854	0.9737	0.9597	1	1	0.9709	1	1	1	1	1	1	0.93	0.972	0.9387	1	1	1	1	1	1	1	1
VWA5B1	924	AT	24			0	1	0.2102	0.0343	0	0.1338	0.1979	0.0824	0	0.0357	0	0	0	0	0.0257	0.0232	0.0237	0	0	0.1329	0.1908	0.0146	0.0263	0.0403	0	0	0.0291	0	0	0	0	0	0	0	0.028	0	0	0	0	0	0	0	0	0
VWA5B1	925	AT	20			0	1	0.2517	0.0263	0	0.0653	0.1046	0	0	0	0	0	0	0	0	0	0	0	0	0.1098	0	0	0	0	0	0	0	0	0	0	0	0	0	0.07	0	0.0613	0	0	0	0	0	0	0	0
DDOST	932	ES	2	1	3	0	1	0.0121	0.0012	0.999	1	0.9993	0.9984	0.999	1	0.9982	0.9992	1	1	0.9994	0.9964	1	0.9988	1	0.9977	1	1	0.9967	0.9991	0.9975	0.9984	0.999	0.9989	0.9978	1	0.9992	1	0.9991	0.9989	1	0.9993	1	0.9968	1	0.9994	0.9986	0.9967	1	1
HP1BP3	936	AP	1			0	1	0.6844	0.1248	0.2115	0.324	0.1443	0.3636	0.2958	0.3791	0.3214	0.1147	0.1936	0.3146	0.2317	0.2248	0.311	0.2191	0.1742	0.3589	0.3026	0.2215	0.2612	0.0999	0.1265	0.1087	0.1516	0.1067	0.1492	0.1972	0.0419	0.0978	0.2704	0.205	0.1343	0.2411	0.2926	0.2028	0.1402	0.143	0.2667	0.3554	0.2133	0.1353
HP1BP3	937	AP	7.1			0	1	0.7282	0.1529	0.7254	0.6052	0.7539	0.5127	0.5407	0.4471	0.5628	0.8008	0.7645	0.6309	0.7025	0.6805	0.5617	0.5558	0.7525	0.5721	0.6099	0.7241	0.5676	0.8837	0.7769	0.8166	0.7937	0.8642	0.8057	0.75	0.9066	0.8457	0.6749	0.7368	0.7878	0.636	0.5637	0.7175	0.8432	0.811	0.6187	0.5923	0.7362	0.8192
HP1BP3	938	AP	2			0	1	0.334	0.0558	0.0631	0.0707	0.1017	0.1237	0.1635	0.1738	0.1158	0.0845	0.0419	0.0545	0.0659	0.0947	0.1273	0.2251	0.0733	0.069	0.0874	0.0544	0.1711	0.0164	0.0966	0.0747	0.0546	0.0291	0.0451	0.0528	0.0515	0.0565	0.0547	0.0583	0.078	0.1228	0.1437	0.0797	0.0166	0.046	0.1146	0.0524	0.0506	0.0455
HP1BP3	939	AT	6			0	1	0.2624	0.0467	0.1553	0.0203	0.1737	0.0176	0.0364	0.031	0.0452	0.1139	0.0992	0.0766	0.0517	0.0331	0.0498	0.043	0.0569	0.0313	0.0472	0.0718	0.0779	0.1446	0.0721	0.1098	0.0756	0.0908	0.0854	0.1391	0.0534	0.1693	0.0959	0.0748	0.2392	0.1225	0.0442	0.064	0.1828	0.1699	0.0801	0.0726	0.167	0.1134
HP1BP3	940	AT	15			0	1	0.2624	0.0467	0.8447	0.9797	0.8263	0.9824	0.9636	0.969	0.9548	0.8861	0.9008	0.9234	0.9483	0.9669	0.9502	0.957	0.9431	0.9687	0.9528	0.9282	0.9221	0.8554	0.9279	0.8902	0.9244	0.9092	0.9146	0.8609	0.9466	0.8307	0.9041	0.9252	0.7608	0.8775	0.9558	0.936	0.8172	0.8301	0.9199	0.9274	0.833	0.8866
EIF4G3	941	AP	1			0	0.8818	0.1668	0.009	1	1	1	1	1	1	1	1	1	1	1	1		1	1	1	1	1	1	1	1	1	1	1	1	1	1	1	1	1	1	1	1	1	1	1	1	1	1	1
EIF4G3	945	AP	3			0	0.8818	0.1668	0.009	0	0	0	0	0	0	0	0	0	0	0	0		0	0	0	0	0	0	0	0	0	0	0	0	0	0	0	0	0	0	0	0	0	0	0	0	0	0	0
EIF4G3	948	AT	42			0	1	0.0783	0.0123	0.9843	0.9695	0.9893	0.9782	1	0.979	0.9847	0.9917	0.9917	1	1	1	1	1	1	1	1	1	0.9855	1	0.9868	1	1	1	1	1	1	0.9612	1	1	0.9934	1	1	1	1	1	1	0.9791	1	0.9829
EIF4G3	949	AT	18.2			0	1	0.0646	0.0095	0.0086	0.0305	0	0.0218	0	0.021	0	0.0083	0	0	0	0	0	0	0	0	0	0	0.0145	0	0.0132	0	0	0	0	0	0	0.0388	0	0	0	0	0	0	0	0	0	0	0	0.0094
EIF4G3	950	AT	22.2			0	1	0.0735	0.0067	0.0071	0	0.0107	0	0	0	0.0153	0	0.0083	0	0	0	0	0	0	0	0	0	0	0	0	0	0	0	0	0	0	0	0	0	0.0066	0	0	0	0	0	0	0.0209	0	0.0077
EIF4G3	951	ES	23	22.1	24	0	0.9945	0.9223	0.093	0.4491	0.4468	0.4138	0.4022	0.349	0.4112	0.2491	0.273	0.348	0.3226	0.1998	0.298	0.333	0.417	0.2165	0.3922	0.2995	0.5251	0.3601	0.3625	0.359	0.2704	0.4163	0.1992	0.2139	0.2935	0.3189	0.2916	0.5031	0.2139	0.2774	0.3789	0.4344	0.3322	0.377	0.2317	0.1811	0.3549	0.247	0.3301
EIF4G3	952	ES	18.1	17	19	0	0.9818	0.5465	0.0711	0.1248	0	0.1636	0	0.0612	0	0.0391	0.09	0.054	0.0537	0.097	0.0376	0.0453	0.0586	0.0181	0.0261	0.0811	0.3121	0.0753	0.1074	0	0.1171	0.1929	0.1929	0.1175	0.1058	0.1367	0.0486	0.2024	0.0586	0.0501	0.1102	0.1153		0.1032	0.0521	0.0917	0.0213	0.0492	0.1858
EIF4G3	954	ES	17	16.2	19	0	1	0.0686	0.0095	1	1	0.982	1	0.985	1	1	0.9703	1	0.9824	1	1	1	1	1	1	1	1	1	0.9873	1	0.9838	1	0.9836	0.9772	0.9938	1	1	0.9914	0.9882	0.9887	0.9941	1	1	0.9929	1	1	0.9888	0.9726	1
EIF4G3	955	ES	16.1:16.2	15	17	0	0.9836	0.3278	0.0375	0.9809	1	0.9574	0.9423	1	1	1	0.9574	1	0.939	0.9797	1	1	0.9597	1	1	1	1	1	1	1	1	1	0.9645	0.9667	0.9503	1	1	1	0.9669	0.9496	1	0.8543	1	0.901	1	0.9389	1	1	0.9452
EIF4G3	956	ES	16.2	15	17	0	0.9836	0.2971	0.034	0.9823	1	0.9814	0.9611	1	1	1	0.9604	1	0.9651	0.9786	1	1	0.9613	1	1	1	1	1	1	1	1	1	0.9444	0.9722	0.9697	1	1	1	0.9544	0.9582	1	0.8978		0.9185	1	0.9384	1	1	0.9103
EIF4G3	957	AA	16.1	15	16.2	0	0.9618	0.8714	0.102	0.4829	0.5101	0.3006	0.3993	0.4916	0.3607	0.4916	0.4829	0.4517	0.3589	0.5166	0.4916	0.3962	0.4916	0.5517	0.6592	0.4085	0.3259	0.4794	0.456	0.5991	0.5517	0.5101	0.6171	0.4551	0.3754	0.4266	0.6171	0.5632	0.5845	0.4532	0.4967	0.401		0.4488	0.4832	0.5032	0.4242	0.4204	0.6311
EIF4G3	959	ES	11	9	12	0	0.88	0.0823	0.0056	0	0	0	0	0	0	0	0	0	0	0		0	0	0	0	0	0	0	0	0	0	0	0	0	0	0	0	0	0	0	0	0	0	0	0	0	0	0	0
EIF4G3	960	ES	10	9	12	0	0.9109	0.3937	0.0657	0.1992	0.0678	0.172	0.2254	0.1137	0	0.1791	0.041	0	0	0.0511		0.1461	0.0335	0.1081	0.0984	0.1538	0.0833	0.081	0	0.1391	0.0603	0.0351	0	0.1365	0.0222	0.0571	0.041	0.1149	0.0494	0.0288	0.1481	0.1538	0.127	0.0517	0.1802	0.1655	0.1227	0.0369	0.0435
ECE1	961	AP	1			0	1	0.8775	0.1466	0.5971	0.355	0.6995	0.3991	0.4694	0.3476	0.7342	0.5733	0.4486	0.6825	0.317	0.4158	0.6745	0.6082	0.5866	0.5108	0.4029	0.6714	0.7518	0.5515	0.584	0.6787	0.7452	0.6594	0.6481	0.7907	0.7283	0.7389	0.7069	0.7511	0.6851	0.5566	0.3813	0.8623	0.5352	0.6683	0.6782	0.5229	0.7493	0.6425
ECE1	962	AP	3.1			0	1	0.8844	0.0648	0.1618	0.2718	0.056	0.1293	0.1471	0.1659	0.0873	0.1498	0.2852	0.1147	0.4143	0.2154	0.0843	0.0932	0.0378	0.1425	0.1762	0.1105	0.0631	0.13	0.137	0.0989	0.1145	0.1573	0.1356	0.1015	0.0837	0.1188	0.0966	0.1128	0.0573	0.0717	0.1717	0.0461	0.1011	0.0773	0.0967	0.1023	0.0591	0.0983
ECE1	963	AP	2			0	1	0.5558	0.0814	0.2142	0.1987	0.1823	0.2006	0.336	0.2388	0.1516	0.2334	0.2222	0.1623	0.2324	0.2672	0.1617	0.2551	0.2635	0.2347	0.3052	0.1414	0.1345	0.2598	0.2025	0.2037	0.0804	0.1537	0.1884	0.063	0.136	0.121	0.1574	0.104	0.2405	0.2364	0.2563	0.0917	0.2373	0.207	0.2054	0.345	0.0949	0.1718
ECE1	964	AP	4.1			0	1	0.5535	0.0815	0.0269	0.1745	0.0622	0.2711	0.0475	0.2477	0.0269	0.0434	0.044	0.0404	0.0363	0.1015	0.0796	0.0436	0.1121	0.1119	0.1157	0.0767	0.0506	0.0587	0.0765	0.0187	0.0599	0.0296	0.0279	0.0449	0.052	0.0213	0.039	0.0322	0.0171	0.1354	0.1908	0	0.1264	0.0474	0.0197	0.0298	0.0966	0.0874
ECE1	965	ES	19	18	20	0	1	0.0245	0.0032	0.9954	0.9968	1	1	1	1	1	1	0.9947	0.9963	0.998	0.9929	0.9976	0.9971	1	0.9943	0.9964	1	0.998	0.9953	0.9992	0.9981	1	0.9987	0.9978	0.9955	0.9988	1	1	0.9984	1	0.9967	0.9892	1	0.9897	0.994	0.996	0.9948	0.9933	1
NBPF3	966	AD	12.3	12.2	13	0	0.9818	0.6881	0.1012	0.9598	0.8936	0.7402	1	0.8414	0.7558	0.8156	0.858	0.9211	0.855	0.9401	0.8357	0.8117	0.8727	0.6388	0.9265	0.932	0.6006	0.7796	0.7879	0.8077	0.9409	0.9637	0.9459	1	0.9653	0.6655	0.8295	0.8609	0.8936	0.8185	0.9048	0.9477	0.9028	0.9511	0.8348	0.9299	0.8537	0.7931	0.9093
NBPF3	967	AA	12.1	11	12.2	0	0.9855	0.595	0.0828	0.0761	0.3726	0.1093	0.1641	0.1037	0.3103	0.022	0.0795	0.0503	0.0946	0.1228	0.1684	0.1719	0.0686	0.1336	0.0538	0.0941	0.0448	0.1189	0.17	0.1589	0.0448	0.1924	0.0406	0.0693	0.1879	0.1826	0.1336	0.16	0.1365	0.0778	0.1451	0.1011	0.1336	0.0879	0.0855	0.1525	0.1304	0.2647	0.1169
NBPF3	968	ES	3:4:5:6	2	7	0	1	0.2772	0.0279	1	1	0.9687	1	1	0.9064	1	0.9352	0.9639	1	1	1	1	1	1	1	1	1	1	1	0.9448	0.9316	1	0.9683	1	1	1	1	1	1	1	0.9604	1	1	1	1	1	0.9629	0.9219	1
NBPF3	970	ES	03:04:05	2	6	0	0.9982	0.4671	0.0495	0.9784	1	0.9668	1	1	0.909	1	0.8748	1	1	1	1	1	0.9496	1	0.9565	1	1	1	1	1	1	1	0.9661	1	0.9707	1	1	1	1	1	0.9606	1	1	0.9781	0.8673	1	0.9606	1	0.9698
ALPL	972	AP	2			0	0.8745	0.4072	0.0225	0	0.0398	0	0.0045		0.0173	0	0	0	0	0	0.017	0	0	0	0.003	0.004	0	0	0.0172	0.0651	0	0.0132	0	0	0	0	0	0	0	0.009	0	0.0059		0	0	0	0	0	0.0079
ALPL	973	AP	9.1			0	0.8745	0	0	0	0	0	0		0	0	0	0	0	0	0	0	0	0	0	0	0	0	0	0	0	0	0	0	0	0	0	0	0	0	0	0		0	0	0	0	0	0
ALPL	974	AP	11			0	0.8745	0.5597	0.0824	0.0648	0.0788	0.0382	0.1128		0.1675	0.0095	0.0696	0.042	0.1433	0.0995	0.1543	0.036	0.0371	0.011	0.1589	0.1884	0.1314	0.0197	0.086	0.1765	0.0406	0.2927	0.1251	0.0643	0.0736	0.2101	0.1128	0.0308	0.0207	0.0169	0.0848	0.0702		0.0239	0.0415	0.0466	0.066	0.0355	0.0819
ALPL	975	AP	1			0	0.8745	0.599	0.0861	0.9352	0.8814	0.9618	0.8827		0.8152	0.9905	0.9304	0.958	0.8567	0.9005	0.8287	0.964	0.9629	0.989	0.8382	0.8076	0.8686	0.9803	0.8968	0.7584	0.9594	0.6941	0.8749	0.9357	0.9264	0.7899	0.8872	0.9692	0.9793	0.9741	0.9152	0.9239		0.9761	0.9585	0.9534	0.934	0.9645	0.9101
ALPL	976	ES	10	9.2	12	0	0.9964	0.0937	0.0081	1	0.998	1	1	1	0.9991	0.9961	0.9884	1	1	1	1	1	0.9934	1	1	1	1	0.9961	1	1	0.9904	1	0.9823	1	1	1	0.9823	1	1	0.9939	0.9987	0.9987	1	1	1	1	1	1	0.9978
ALPL	977	ES	5	4	6	0	0.9727	0.12	0.013	1	0.9893	1	1	1	0.9957	1	1	0.9896	1	1	1	1	0.9889	1	0.9889	0.9974	0.9728	1	1	1	0.9974	1	0.9439	1	1	1	1	0.88	1	0.9893	1	0.9959		1	1	1	1	1	1
ALPL	978	ES	3	1	4	0	0.9527	0.3745	0.04	0.9512	0.9688	0.9738	0.9918	0.7767	0.9931	0.9761	0.9752	1	1	0.9697	1	1	0.9256	1	0.9783	0.989	1	0.9791	0.9852	1	0.981	0.9641	0.9535	1	1	0.9768	1	0.9589	0.9752	0.9781	0.9879	0.9914	1	0.9886	1	0.9485	1	0.9674	0.9905
RAP1GAP	983	AA	26.1:26.2	25.2	26.3	0	0.7945	0.8886	0.1442	0.8785	0.8255	0.6663	0.783		0.8388	0.8385	0.6384		0.7226	0.8803	0.7799		0.7298	0.4017	0.753	0.5611	0.5585		0.7473	0.6824	0.4337	0.5817	0.4709	0.8186	0.5271	0.7034	0.5406	0.4737		0.7404	0.6745	0.7074		0.73	0.6574	0.6709	0.6578	0.6636	0.6658
RAP1GAP	984	AA	26.2	25.2	26.3	0	0.9527	0.4293	0.0613	0.9459	0.8989	0.918	0.88	0.8462	0.9268	0.9286	0.895	0.8837	0.9295	0.964	0.9143	0.8462	0.8964	0.7941	0.8794	0.8447	0.7599	0.9538	0.912	0.9194	0.8709	0.8662	0.8598	0.8977	0.8443	0.8885	0.8414	0.8432	0.8751	0.9186	0.8558	0.895	0.854	0.9073	0.8859	0.9049	0.8952	0.8945	0.9154
RAP1GAP	985	AA	26.1	25.2	26.2	0	0.9455	0.571	0.0813	0.2938	0.3516	0.1501	0.3338		0.297	0.286	0.1731	0.1185	0.1678	0.2171	0.2497		0.2364	0.1467	0.297	0.1896	0.2864	0.0759	0.2198	0.156	0.1026	0.1786	0.1245	0.3456	0.1704	0.231	0.1827	0.1425	0.1854	0.1997	0.2569	0.2219	0.0538	0.218	0.2019	0.1767	0.1831	0.192	0.156
RAP1GAP	986	AA	25.1	24	25.2	0	0.9855	0	0	1	1	1	1	1	1	1	1	1	1	1	1	1	1	1	1	1	1	1	1	1	1	1	1	1	1	1	1	1	1	1	1	1	1	1	1	1	1	1	1
RAP1GAP	990	AA	22.1:22.2:22.3	21	22.4	0	0.9491	0.5222	0.0592	0.0581	0.0577	0.1972	0.2677	0.0067	0.082	0.037	0.0417	0.0549	0.0436	0.1189	0.1402	0.0247	0.0307	0.0811	0.095	0.1121	0.1676	0.0198	0.2333	0.1772	0.0601	0.1326	0.0416	0.0572	0.0542	0.2022	0.1846	0.0164	0.1895	0.0826	0.0608	0.0376	0.1394	0.1861	0.0417	0.0355	0.041	0.0682	0.0619
RAP1GAP	991	ES	22.1:22.2	21	22.4	0	0.9073	0.1563	0.0223	0.04	0	0	0	0.0209	0	0.0311	0.0141	0.0376	0.0421	0	0.0262	0.0742	0	0	0	0.0275	0	0.0058	0	0	0	0	0.0268	0.0453	0	0	0	0.0131	0.1563	0	0	0.0284		0.028	0	0	0	0	0
RAP1GAP	992	ES	22.1	21	22.4	0	0.9145	0.4063	0.0572	0.0621	0.1624	0.0761	0.1228	0.0286	0.0541	0.0737	0.0728	0.0225	0.1577	0.0216	0.1126	0	0.0082	0.0941	0.0804	0.1078	0.0252	0.0674	0.1413	0.0621	0.0684	0	0	0.0334	0.0216	0.0878	0.0894	0.0317		0.176	0.0696	0.0611		0.1192	0.0223	0.0189	0.121	0.0341	0
USP48	994	AP	12.1			0	1	0.8816	0.183	0.4098	0.4098	0.3548	0.5221	0.3981	0.6498	0.3908	0.3694	0.4016	0.5359	0.668	0.5471	0.4953	0.277	0.4186	0.6322	0.5305	0.7292	0.4622	0.5958	0.6115	0.44	0.6358	0.5343	0.6213	0.7436	0.7292	0.5931	0.3536	0.7422	0.31	0.2855	0.5677	0.4402	0.6176	0.3503	0.3825	0.3247	0.5234	0.6957
USP48	995	AP	1			0	1	0.8816	0.183	0.5902	0.5902	0.6452	0.4779	0.6019	0.3502	0.6092	0.6306	0.5984	0.4641	0.332	0.4529	0.5047	0.723	0.5814	0.3678	0.4695	0.2708	0.5378	0.4042	0.3885	0.56	0.3642	0.4657	0.3787	0.2564	0.2708	0.4069	0.6464	0.2578	0.69	0.7145	0.4323	0.5598	0.3824	0.6497	0.6175	0.6753	0.4766	0.3043
USP48	996	AT	27			0	1	0.6204	0.1165	0.5454	0.542	0.4755	0.6428	0.5403	0.6394	0.4944	0.5351	0.7317	0.4686	0.583	0.7227	0.6198	0.5085	0.6388	0.6621	0.7221	0.602	0.5819	0.5491	0.5057	0.5845	0.5421	0.5987	0.5313	0.4845	0.5977	0.4796	0.5356	0.6093	0.6179	0.69	0.5483	0.4315	0.6494	0.6294	0.4265	0.4848	0.6932	0.6037
USP48	997	AT	11.2			0	1	0.6204	0.1165	0.4546	0.458	0.5245	0.3572	0.4597	0.3606	0.5056	0.4649	0.2683	0.5314	0.417	0.2773	0.3802	0.4915	0.3612	0.3379	0.2779	0.398	0.4181	0.4509	0.4943	0.4155	0.4579	0.4013	0.4687	0.5155	0.4023	0.5204	0.4644	0.3907	0.3821	0.31	0.4517	0.5685	0.3506	0.3706	0.5735	0.5152	0.3068	0.3963
USP48	998	ES	23	22	24	0	1	0.1099	0.015	0.99	1	0.9804	0.982	0.9639	1	0.9853	0.9633	0.9941	0.9738	0.9861	0.9895	1	0.9894	0.9903	0.9807	0.9849	0.9939	0.9935	1	0.9752	0.9855	0.984	0.9571	1	0.9857	0.9902	0.9773	0.98	0.984	0.9848	0.9574	0.9885	0.9622	0.9932	0.9805	1	0.9787	0.958	0.9776
USP48	999	AA	16.1	15	16.2	0	0.9982	0.0542	0.0092	0	0	0.0257	0	0.0184	0	0	0	0	0	0	0.0175	0	0	0	0	0	0.0111	0.009	0.0275	0.0361	0.0134	0.0059	0	0.0184	0.0179	0.0223	0.0114	0.025	0	0	0.0081	0	0.026	0.0101	0.0092	0	0	0.0137	0
USP48	1000	AA	14.1	13	14.2	0	1	0.4625	0.0724	0.7696	0.7524	0.6774	0.8238	0.7303	0.8186	0.7747	0.7566	0.7074	0.7861	0.7602	0.8003	0.6929	0.7946	0.8286	0.7719	0.7986	0.7786	0.7193	0.7691	0.6592	0.7241	0.7215	0.5919	0.7538	0.5663	0.7831	0.7437	0.7696	0.7736	0.6542	0.7274	0.8097	0.5801	0.7295	0.6544	0.7719	0.6683	0.6592	0.6263
USP48	1001	AA	10.1	9	10.2	0	1	0.3115	0.0468	0.8633	0.9437	0.8413	0.9516	0.8764	0.84	0.8695	0.8494	0.8943	0.9084	0.8969	0.8043	0.9028	0.8404	0.8564	0.9215	0.8739	0.8929	0.8035	0.8627	0.8735	0.8547	0.8678	0.7611	0.8245	0.8218	0.878	0.8575	0.8112	0.957	0.7965	0.831	0.9312	0.7838	0.8725	0.8614	0.8447	0.8482	0.8194	0.8317
LDLRAD2	1002	RI	5.2	5.1	5.3	0	0.9964	0.3041	0.016	1	1	1	1	1	1	1	1	1	1	1	1	1	1	1	1	1	1	1	1	1	1	1	1	1	1	1	1	1	1	1	1	1	1	1	1	1	1	1	1
CDC42	1003	AT	8			0	1	0.0412	0.0049	0.0089	0.006	0.0103	0.007	0.0061	0.0091	0.0077	0.0096	0.0056	0.0085	0.0058	0.0045	0.0076	0.0028	0.0089	0.0066	0.0039	0.0092	0.0086	0.0056	0.01	0.0058	0.0136	0.0065	0.0063	0.0095	0.01	0.0144	0.0061	0.0046	0.009	0.0087	0.0043	0.0053	0.0179	0.0057	0.0046	0.0074	0.0093	0.0148
CDC42	1004	AT	9			0	1	0.0412	0.0049	0.9911	0.994	0.9897	0.993	0.9939	0.9909	0.9923	0.9904	0.9944	0.9915	0.9942	0.9955	0.9924	0.9972	0.9911	0.9934	0.9961	0.9908	0.9914	0.9944	0.99	0.9942	0.9864	0.9935	0.9937	0.9905	0.99	0.9856	0.9939	0.9954	0.991	0.9913	0.9957	0.9947	0.9821	0.9943	0.9954	0.9926	0.9907	0.9852
CDC42	1005	ES	4	3	5	0	1	0.0339	0.0052	0.021	0.0106	0.0149	0.0064	0.0049	0.0132	0.0064	0.0123	0.0053	0.0116	0.0122	0.0051	0.0114	0.007	0.011	0.0064	0.0097	0.0167	0.0013	0.0049	0.0079	0.0123	0.0118	0.0111	0.0206	0.0115	0.0045	0.0135	0.0071	0.0159	0.0082	0.0041	0.0051	0.0153	0.0088	0.0112	0.0217	0.0163	0.0084	0.0096
CDC42	1006	ES	2	1	3	0	1	0.1552	0.023	0.0762	0.0766	0.0672	0.0857	0.0688	0.0986	0.08	0.1166	0.08	0.0829	0.0821	0.0753	0.0391	0.0848	0.0961	0.0872	0.0752	0.0853	0.064	0.0813	0.0488	0.0732	0.084	0.0688	0.1042	0.1068	0.051	0.0728	0.0841	0.105	0.0682	0.0752	0.0705	0.0743	0.1347	0.0721	0.0635	0.085	0.1031	0.0817
ZBTB40	1009	ES	05:06:00	4	7	0	0.9927	0.3046	0.0382	1	1	1	1	1	1	1	1	1	1	1	1	1	1	1	1	1	0.9425	1	1	1	1	0.9667	1	1	0.958	1	1	0.9445	1	1	1	1	0.879	1	0.96	1	0.9152	1	1
C1QA	1011	AP	1			0	0.9945	0.2207	0.0228	1	1	1	0.9836	0.9672	0.9652	0.972	0.9685	0.9576	0.9779	0.9612	0.9757	1	0.9816	0.9805	0.9847	0.9802	0.9543	0.9888	1	0.9636	1	0.9827	1	1	0.9503	0.9793	0.9961	1	1	0.9727	0.9546	0.9783	0.9622	0.9721	0.9847	1	1	0.9808	0.9833
C1QA	1012	AP	2.1			0	0.9945	0.2207	0.0228	0	0	0	0.0164	0.0328	0.0348	0.028	0.0315	0.0424	0.0221	0.0388	0.0243	0	0.0184	0.0195	0.0153	0.0198	0.0457	0.0112	0	0.0364	0	0.0173	0	0	0.0497	0.0207	0.0039	0	0	0.0273	0.0454	0.0217	0.0378	0.0279	0.0153	0	0	0.0192	0.0167
C1QC	1014	AD	1.3	1.2	2	0	0.9364	0.7697	0.096	0.1566	0.178	0.3023	0.1271	0.2905	0.1591	0.2883	0.2869	0.2152	0.2505	0.2919	0.2262	0.2037	0.2126	0.3952	0.2142	0.2099	0.2432	0.2091	0.1417	0.2853	0.2764	0.282	0.2628	0.1101	0.3823	0.2128	0.2173	0.2999	0.558	0.1746	0.2023	0.2096	0.2447	0.2414	0.2539	0.0959	0.3577	0.1811	0.3513
C1QC	1019	AD	1.2:1.3	1.1	2	0	0.9964	0.1399	0.0151	0.017	0.0171	0.0339	0.0152	0.0282	0.0127	0.0242	0.0187	0.0197	0.0286	0.03	0.0206	0.0168	0.0288	0.0348	0.025	0.0229	0.0208	0.0183	0.0138	0.0269	0.0252	0.0265	0.0286	0.0115	0.0408	0.0233	0.0234	0.0291	0.0588	0.0197	0.0197	0.0176	0.0144	0.0248	0.0255	0.0125	0.0321	0.0155	0.0383
C1QC	1020	AD	1.2	1.1	2	0	0.9964	0.3696	0.0283	0.0967	0.078	0.1196	0.1062	0.0794	0.0754	0.0743	0.0645	0.0851	0.1195	0.0791	0.0806	0.0774	0.1071	0.0586	0.0911	0.0848	0.0698	0.0756	0.079	0.0697	0.0707	0.0763	0.083	0.0986	0.0756	0.0845	0.0849	0.0638	0.0494	0.0954	0.085	0.0799	0.057	0.0856	0.0855	0.1119	0.0656	0.0789	0.0796
EPHB2	1023	AT	8			0	1	0.0806	0.0052	0	0	0	0	0	0	0	0	0	0	0	0	0	0	0	0	0	0	0	0.0033	0	0.0039	0	0	0	0	0	0	0	0	0	0	0	0	0	0	0.0069	0	0	0.0126
EPHB2	1024	AT	17.5			0	1	0.0806	0.0052	1	1	1	1	1	1	1	1	1	1	1	1	1	1	1	1	1	1	1	0.9967	1	0.9961	1	1	1	1	1	1	1	1	1	1	1	1	1	1	0.9931	1	1	0.9874
EPHB2	1025	RI	17.4	17.3	17.5	0	0.9745	0.2009	0.0211	1	1	0.946	1	1	1	1	1	0.9831	1	0.9935	1	1	1	1	1	1	0.974	1	0.9736	0.9413	0.9754	1	0.9912	1	1	1	0.9528	0.9754	1	0.9741	1	1		0.9948	1	1	1	1	1
EPHB2	1026	RI	17.2	17.1	17.3	0	1	0.9811	0.1663	0.4307	0.4099	0.2187	0.5264	0.1625	0.4099	0.5557	0.3353	0.0598	0.5526	0.1027	0.2604	0.1212	0.1645	0.3346	0.2942	0.2592	0.2093	0.1892	0.1016	0.4809	0.086	0.3062	0.1359	0.4212	0.4477	0.155	0.2389	0.0579	0.2507	0.0834	0.2625	0.3018	1	0.1029	0.3165	0.1952	0.3513	0.1702	0.4006
EPHB2	1027	AA	11.1	10	11.2	0	0.7891	0.4365	0.0663			0.1872					0	0.1344		0.1319		0.0843	0.1621		0.2165		0	0.1677	0.1078	0	0.0792	0.097	0.1233			0.1388	0.1109	0.1214	0	0.1256	0.1495	0.2438		0.1204	0.1388	0.1129	0.0538	0.0293	0
KDM1A	1030	ES	11	9	12	0	1	0.0129	0.0009	0	0	0	0	0	0	0	0	0	0	0	0	0	0	0	0	0	0	0	0	0	0	0	0	0	0	0	0	0	0	0	0	0	0	0	0	0	0	0	0
KDM1A	1031	ES	10	9	12	0	1	0.0064	0.0006	0	0	0	0	0	0	0	0	0	0	0	0	0	0	0	0	0	0	0	0	0	0	0	0	0	0	0	0	0	0	0	0	0	0	0	0	0	0	0	0
KDM1A	1032	ES	3	2	4	0	1	0.5138	0.083	0.5978	0.6715	0.4833	0.7483	0.6785	0.8005	0.6856	0.5978	0.6301	0.8168	0.7176	0.7631	0.7218	0.6735	0.629	0.7583	0.6448	0.585	0.6476	0.6408	0.6802	0.6331	0.5915	0.5582	0.6434	0.6095	0.563	0.5432	0.5906	0.6622	0.6297	0.6078	0.8063	0.6739	0.6154	0.6003	0.6095	0.7015	0.563	0.6748
LUZP1	1036	AT	5			0	1	0.0444	0.0063	0.0022	0.0015	0	0.0059	0.0025	0	0	0.0064	0	0.0066	0.0053	0	0	0	0.0047	0.004	0.003	0.0052	0.003	0.0064	0.0065	0	0.0168	0.0083	0.0133	0.019	0.007	0.0037	0	0	0.002	0.0106	0.0367	0.0207	0.0127	0	0.0104	0	0.0252	0.0061
LUZP1	1037	AT	6			0	1	0.0444	0.0063	0.9978	0.9985	1	0.9941	0.9975	1	1	0.9936	1	0.9934	0.9947	1	1	1	0.9953	0.996	0.997	0.9948	0.997	0.9936	0.9935	1	0.9832	0.9917	0.9867	0.981	0.993	0.9963	1	1	0.998	0.9894	0.9633	0.9793	0.9873	1	0.9896	1	0.9748	0.9939
LUZP1	1039	ES	3.2	2	4	0	0.8891	0.212	0.0234	1	1	1	1	1	1	1	1	1	1	1	1	1	1	0.9042	1	1	1	1	0.9273	1	1	1	1	1	0.9738	1	1	1	1	1	1	1	1	1	0.9682	1	1	1	1
HTR1D	1041	AT	2			0	0.9273	0.4312	0.0199	0	0	0	0	0	0		0	0	0	0	0	0	0	0	0	0	0	0	0	0	0	0	0	0	0	0	0	0	0	0	0	0	0	0	0	0	0	0	0
HTR1D	1042	AT	1.2			0	0.9273	0.4312	0.0199	1	1	1	1	1	1		1	1	1	1	1	1	1	1	1	1	1	1	1	1	1	1	1	1	1	1	1	1	1	1	1	1	1	1	1	1	1	1	1
HNRNPR	1043	AA	8.1	7	8.2	0	1	0.2967	0.0424	0.1801	0.165	0.1116	0.1978	0.1313	0.2415	0.1242	0.1507	0.2409	0.0964	0.1188	0.2103	0.0964	0.1147	0.1507	0.2036	0.1477	0.1989	0.1428	0.0902	0.2364	0.1438	0.1527	0.13	0.1649	0.0827	0.1397	0.1142	0.1052	0.0987	0.1373	0.1649	0.0959	0.1124	0.1883	0.153	0.1201	0.0911	0.1628	0.0858
HNRNPR	1044	ES	6	5	7	0	1	0.09	0.0101	0.9959	0.9755	0.9901	0.984	0.9675	0.9934	0.9964	0.9878	0.9774	0.9833	0.9967	0.9817	0.9817	0.9767	0.9951	0.9963	1	0.9953	0.9809	0.9908	0.9914	1	0.9839	0.9819	0.9809	0.9923	0.984	0.9861	0.992	0.9923	0.9951	0.9906	0.9539	0.9666	0.9974	1	0.9841	0.9826	0.9841	0.9842
HNRNPR	1046	ES	5	4	6	0	1	0.1062	0.0159	0.9756	0.9467	0.9562	0.9524	0.9187	0.9475	0.9443	0.9606	0.9411	0.9315	0.9544	0.9719	0.9744	0.9359	0.9802	0.9787	0.9709	0.9707	0.9232	0.9567	0.9339	0.9914	0.9741	0.9738	0.9843	0.9548	0.9381	0.9697	0.9601	0.9857	0.9712	0.9606	0.9568	0.962	0.9683	0.9804	0.9636	0.9812	0.9894	0.955
HNRNPR	1047	AA	2.1	1	2.2	0	0.9964	0.808	0.0912	0.5423	0.5301	0.335	0.4916	0.4482	0.3424	0.3086	0.5542	0.3855	0.4204	0.5708	0.3672	0.311	0.4293	0.392	0.5871	0.3849	0.2117	0.4112	0.5687	0.6074	0.5301	0.4462	0.5781	0.3353	0.4242	0.4916	0.3739	0.5663	0.5144	0.5309	0.4183	0.4293	0.2567	0.4037	0.5035	0.4916	0.4822	0.4765	0.4204
HNRNPR	1048	ES	2.1:2.2	1	3	0	1	0.5308	0.0745	0.399	0.3301	0.25	0.251	0.2437	0.1626	0.1475	0.4269	0.1971	0.2359	0.2495	0.208	0.1976	0.1774	0.3157	0.3638	0.3386	0.1315	0.2774	0.2498	0.3067	0.2331	0.3079	0.2634	0.2071	0.2772	0.2974	0.3487	0.3443	0.4501	0.4748	0.3154	0.242	0.1535	0.2282	0.3011	0.3085	0.3168	0.2293	0.283
HNRNPR	1049	ES	2.2	1	3	0	1	0.5417	0.0752	0.3607	0.3058	0.4	0.2589	0.285	0.2728	0.2806	0.376	0.2827	0.3003	0.201	0.3132	0.3548	0.2238	0.4186	0.288	0.4519	0.3621	0.3562	0.2026	0.2236	0.2134	0.3572	0.208	0.3426	0.3439	0.306	0.4742	0.2883	0.4377	0.4454	0.3922	0.2996	0.3458	0.3056	0.2992	0.317	0.3338	0.2473	0.3543
ZNF436	1050	AP	1			0	0.9873	0.881	0.174	0.1016	0.3926	0.2078	0.472	0.717	0.707	0.2642	0.1883	0.4034	0.6376	0.3235	0.3441	0.512	0.4978	0.1563	0.3146	0.4013	0.5058	0.4814	0.4701	0.4764	0.387	0.4356	0.2619	0.2564	0.3588	0.4728	0.2481	0.317	0.3763	0.149	0.134	0.5639	0.241	0.7064	0.5365	0.3542	0.2288	0.3591	0.3916
ZNF436	1051	AP	2.1			0	0.9873	0.881	0.174	0.8984	0.6074	0.7922	0.528	0.283	0.293	0.7358	0.8117	0.5966	0.3624	0.6765	0.6559	0.488	0.5022	0.8437	0.6854	0.5987	0.4942	0.5186	0.5299	0.5236	0.613	0.5644	0.7381	0.7436	0.6412	0.5272	0.7519	0.683	0.6237	0.851	0.866	0.4361	0.759	0.2936	0.4635	0.6458	0.7712	0.6409	0.6084
C1orf213	1054	RI	1.5	1.4	1.6	0	0.94	0.8307	0.1803	1		0.7827	0.628	1		1	1	1	1	1	1	1	0.5455	0.594	0.7753	1	0.9	0.5877	0.9184	0.7634	0.8901	0.9395	0.9288	1	0.9153	1	1	1	1	0.9369	0.8901	0.6695	0.8105	0.9153	1	0.9153	0.8491	0.8105	1
C1orf213	1055	RI	1.3	1.2	1.4	0	0.9982	0.6551	0.1422	0.4966	0.5306	0.8574	0.6957	1	0.5811	0.8222	0.7129	1	1	0.9133	0.3449	0.874	0.7581	0.7421	0.8989	1	0.9275	0.7917	0.917	1	1	0.8624	0.8183	1	0.8779	0.8983	1	1	0.9348	0.9425	0.8205	0.6143	1	0.9316	0.9161	1	1	0.8884	0.9541
C1orf213	1056	RI	1.2:1.3	1.1	1.4	0	0.9982	0.5824	0.1192	0.8208	1	0.8554	1	1	0.5931	0.5296	0.8792	1	1	0.8394	0.6873	1	0.7729	0.8488	0.9001	1	1	1	1	1	0.8376	0.8628	0.8143	1	0.9655	0.8132	1	1	1	1	0.9026	1	1	0.9775	1	1	1	0.8878	0.8712
TCEA3	1058	AP	1			0	0.9964	0.3475	0.0416	0.9501	0.9961	0.9581	0.9575	0.9864	0.9647	0.9642	0.895	0.98	0.9387	0.9251	0.8829	0.9407	0.9338	0.9278	0.9643	0.976	0.934	0.9349	0.8215	0.8766	0.9674	0.8654	0.9282	0.9056	0.8874	0.9307	0.9217	0.9586	0.8335	0.9187	0.9088	0.9547	0.9488	0.8634	0.947	0.9297	0.968	0.8673	0.9263
TCEA3	1059	AP	2.1			0	0.9964	0.3475	0.0416	0.0499	0.0039	0.0419	0.0425	0.0136	0.0353	0.0358	0.105	0.02	0.0613	0.0749	0.1171	0.0593	0.0662	0.0722	0.0357	0.024	0.066	0.0651	0.1785	0.1234	0.0326	0.1346	0.0718	0.0944	0.1126	0.0693	0.0783	0.0414	0.1665	0.0813	0.0912	0.0453	0.0512	0.1366	0.053	0.0703	0.032	0.1327	0.0737
TCEA3	1060	AT	6			0	1	0.2019	0.0205	0.022	0.0088	0.0096	0.0128	0.0376	0.0061	0.0322	0.0525	0.0283	0.0271	0	0.0155	0	0.0641	0.0222	0.0141	0.024	0.0108	0.0553	0.027	0.0318	0.0148	0.0176	0.0239	0.0227	0.0026	0.033	0.0475	0.0445	0.0205	0.0501	0.0255	0.0111	0.0528	0.0272	0.0067	0	0.0276	0.0154	0.0652
TCEA3	1061	AT	12			0	1	0.2019	0.0205	0.978	0.9912	0.9904	0.9872	0.9624	0.9939	0.9678	0.9475	0.9717	0.9729	1	0.9845	1	0.9359	0.9778	0.9859	0.976	0.9892	0.9447	0.973	0.9682	0.9852	0.9824	0.9761	0.9773	0.9974	0.967	0.9525	0.9555	0.9795	0.9499	0.9745	0.9889	0.9472	0.9728	0.9933	1	0.9724	0.9846	0.9348
TCEA3	1063	ES	2.2	1	3	1	0.7655	0.3986	0.0585	0.8621	0.9561		0.9698		0.9219	0.9073	0.916				0.9634		0.9268	0.9074	0.958	0.9438	0.8852	0.9078		0.9213		0.9033	0.7941	0.9337	0.9548	0.8801	0.9568	0.9545	0.9445		0.9324	0.9626	0.8453	0.9135	0.9124		0.967	0.9409	0.8939
ASAP3	1066	AD	21.2	21.1	22	0	0.8964	0.5762	0.0919	0.1848	0.0974	0.1564	0.1627	0.2256	0.1147	0.1147	0.0608	0.3682	0.264	0.2358	0.0985	0.1723	0.0679	0.1044	0.1044	0.1147	0.1673	0.1848	0.2798	0.2256	0.1998	0.2687	0.0958	0.0795	0.3119	0.11	0.2312	0.1093	0.1521	0.1564	0.2036	0.1044		0.2571	0.2191	0.2498	0.189	0.3041	0.1521
PITHD1	1068	AP	1			0	1	0.1985	0.0289	0.9725	0.9771	0.9734	0.9682	0.9617	0.9099	0.9433	0.989	0.9326	1	0.9845	0.9791	0.986	0.9534	0.9727	0.9642	0.9719	0.9831	0.9677	0.9757	0.9536	0.9757	0.9513	0.9562	0.9911	0.9217	0.9853	0.9197	0.9659	0.987	0.9933	0.9678	1	0.9636	0.9163	0.969	0.9804	0.9795	0.959	0.9711
PITHD1	1069	AP	4			0	1	0.1985	0.0289	0.0275	0.0229	0.0266	0.0318	0.0383	0.0901	0.0567	0.011	0.0674	0	0.0155	0.0209	0.014	0.0466	0.0273	0.0358	0.0281	0.0169	0.0323	0.0243	0.0464	0.0243	0.0488	0.0438	0.0089	0.0783	0.0147	0.0803	0.0341	0.013	0.0067	0.0322	0	0.0364	0.0837	0.031	0.0196	0.0205	0.041	0.0289
LYPLA2	1070	AP	1			0	0.9982	0.4469	0.057	0.9317	0.8178	0.9536	0.9814	0.9779	0.8835	0.9574	0.9753	0.992	1	0.9659	0.5531	0.9696	0.9526	0.9765	0.7146	0.7748	0.9703	0.887	0.9607	0.9447	0.9649	0.9061	0.9613	0.9634	0.8937	0.9184	0.9493	0.9683	0.8862	0.9918	0.9727	0.8379	1	0.9519	0.9516	1	1	0.9628	0.9557
LYPLA2	1071	AP	5.1			0	0.9982	0.4469	0.057	0.0683	0.1822	0.0464	0.0186	0.0221	0.1165	0.0426	0.0247	0.008	0	0.0341	0.4469	0.0304	0.0474	0.0235	0.2854	0.2252	0.0297	0.113	0.0393	0.0553	0.0351	0.0939	0.0387	0.0366	0.1063	0.0816	0.0507	0.0317	0.1138	0.0082	0.0273	0.1621	0	0.0481	0.0484	0	0	0.0372	0.0443
LYPLA2	1072	RI	8.5	8.4	8.6	0	1	0.3203	0.0391	0.0996	0.1849	0.0869	0.0672	0.0405	0.0968	0.0785	0.0429	0.0684	0.0514	0.0488	0.0481	0.0896	0.0702	0.0345	0.1267	0.1332	0.0635	0.0483	0.0436	0.1216	0.0542	0.1374	0.0756	0.1137	0.1426	0.0664	0.0912	0.0305	0.109	0.0284	0.109	0.0419	0.0752	0.1499	0.0701	0.0983	0.081	0.0777	0.1065
LYPLA2	1073	RI	8.2:8.3	8.1	8.4	0	0.9945	0.848	0.1416	0.8675	0.9131	0.5477	0.5173	0.6994	0.7246	0.5724	0.5421	0.7043	0.7093	0.6596	0.7626	0.9067	0.6089	0.7764	0.902	0.8865	0.8711	0.9015	0.7478	0.8971	0.71	0.7189	0.8838	0.812	0.7954	0.963	0.9275	0.554	0.7702	0.6299	0.6554	0.711	0.8454	0.8889	0.835	0.9107	0.6847	0.7687	0.8698
LYPLA2	1074	AA	8.3	8.1	8.4	0	1	0.1645	0.0121	0.9759	0.9838	0.9448	0.9385	0.98	0.9785	0.9628	0.9736	0.9728	0.9716	0.9684	0.9706	0.9878	0.9861	0.9869	0.9899	0.9875	0.9904	0.9905	0.9786	0.9913	0.9762	0.9639	0.9864	0.9737	0.9674	0.9963	0.9882	0.9751	0.9712	0.9837	0.9484	0.9709	0.9792	0.9761	0.9835	0.992	0.948	0.9829	0.9825
LYPLA2	1075	RI	8.2	8.1	8.3	0	0.9982	0.2134	0.0385	0.1562	0.1672	0.0787	0.0725	0.055	0.0635	0.0574	0.0366	0.0724	0.0751	0.0678	0.1009	0.1262	0.0261	0.0495	0.097	0.1006	0.0733	0.0949	0.0724	0.0827	0.0668	0.0994	0.1095	0.1191	0.1284	0.1022	0.1548	0.0355	0.1031	0.0318	0.1095	0.0759	0.1168	0.1861	0.0879	0.0873	0.1229	0.0624	0.1224
LYPLA2	1076	ES	7	6	8.1	0	1	0.0332	0.0018	0.9964	1	1	1	1	1	1	1	1	1	1	1	0.9957	1	1	1	1	0.9973	1	1	0.9968	1	1	1	1	1	1	1	1	0.9961	1	1	1	1	1	1	1	1	1	1
GALE	1077	ES	3	2	4	1	0.9109	0.3235	0.0556	0.8666	0.879	0.9437	0.8585	0.9267	0.8631	0.9204	0.8516	0.9122	0.8295		0.9641	0.8219	0.9371	0.9564	0.8631	0.95		0.8921	0.9162	0.9135	0.8974	0.8512	0.8605		0.8389	0.9214	0.8585	0.8916	0.9247	0.8711	0.8993	0.8919		0.9132	0.8468	0.8555	0.9326	0.9338	0.9028
HMGCL	1078	AP	1			0	1	0.3261	0.0291	0.0409	0.0115	0.0622	0.0017	0	0.0112	0.0139	0.0173	0.0035	0.0045	0.005	0	0	0.0015	0.0051	0.0103	0	0.0034	0.0041	0.012	0.0036	0.0595	0.074	0.018	0.0108	0.0104	0	0.0023	0.0131	0.0183	0.008	0.0233	0.009	0	0.0944	0.0109	0	0.0379	0.0099	0.0129
HMGCL	1079	AP	3			0	1	0.3261	0.0291	0.9591	0.9885	0.9378	0.9983	1	0.9888	0.9861	0.9827	0.9965	0.9955	0.995	1	1	0.9985	0.9949	0.9897	1	0.9966	0.9959	0.988	0.9964	0.9405	0.926	0.982	0.9892	0.9896	1	0.9977	0.9869	0.9817	0.992	0.9767	0.991	1	0.9056	0.9891	1	0.9621	0.9901	0.9871
HMGCL	1080	ES	07:08:00	6	9	0	1	0.156	0.0206	0.9699	0.9654	0.9646	0.9888	0.9284	0.9867	0.9707	0.965	0.9684	0.9649	0.9691	1	0.9647	1	0.9771	0.9838	0.9938	0.9835	0.9714	0.9908	0.9928	1	0.9442	0.977	0.979	0.939	0.9828	0.9586	0.9675	0.9907	0.9834	0.9885	0.9819	0.9843	0.9914	0.9628	0.844	1	0.9585	0.9917
MYOM3	1085	AT	31.2			0	0.9891	0.3546	0.0431	0	0	0	0	0	0	0	0.1526	0	0	0	0.1863	0	0	0.0287	0.2035	0	0	0	0	0.0271	0	0	0	0	0	0	0	0	0	0	0	0	0	0	0	0	0	0	0
MYOM3	1086	AT	39			0	0.9891	0.3546	0.0431	1	1	1	1	1	1	1	0.8474	1	1	1	0.8137	1	1	0.9713	0.7965	1	1	1	1	0.9729	1	1	1	1	1	1	1	1	1	1	1	1	1	1	1	1	1	1	1
IFNLR1	1092	AT	7.2			0	1	0.592	0.0971	0.0878	0.0221	0.0499	0.0303	0.0323	0	0.086	0.1743	0	0.1874	0	0	0.0579	0.0319	0	0	0.0234	0.1868	0.0398	0.0248	0.3315	0	0	0.0963	0.0227	0.0221	0.1529	0	0.025	0.0255	0	0	0	0	0.223	0.2031	0.0214	0.0215	0.0684	0.1297
IFNLR1	1093	AT	5.2			0	1	0.3269	0.0499	0.027	0.0102	0.0346	0.014	0.1044	0.0454	0.0661	0.1709	0.0224	0.0865	0	0	0.0535	0.0442	0.0172	0.0598	0.0757	0.0431	0.0919	0.0572	0.0417	0.0514	0.0452	0.1482	0.0314	0.0407	0.0353	0.0775	0.0807	0.0472	0.0289	0.0358	0.0421	0.2361	0.0579	0.0652	0.0197	0.0496	0	0.2195
IFNLR1	1094	AT	8.2			0	1	0.6942	0.1168	0.8852	0.9677	0.9155	0.9557	0.8632	0.9546	0.8479	0.6548	0.9776	0.7261	1	1	0.8886	0.9239	0.9828	0.9402	0.9009	0.77	0.8682	0.918	0.6268	0.9486	0.9548	0.7555	0.9459	0.9372	0.8119	0.9225	0.8943	0.9273	0.9711	0.9642	0.9579	0.7639	0.7191	0.7316	0.9589	0.9289	0.9316	0.6508
IFNLR1	1095	AA	8.1	7.1	8.2	0	0.9109	0.181	0.0084	1	1	1	1	1	1	1	1	1	1	1			1	1	1	1	1	1	1	1	1	1	1	1	1		1	1	1	1	1	1		1	1	1	1	1	1
IFNLR1	1096	ES	7.1	6	8.1	0	0.9309	0.4762	0.0747	0.9614	0.9548	0.9589	0.7808	1	0.9126	0.9373	0.8767	0.8984	0.9436	1	1	0.8491	0.9451	1	0.9731	0.9363	1	1	0.8254	0.833	0.8393	1	1	1	1		0.9428	0.9205	1	1	1	1		0.9231	0.952	0.8871	0.861	0.7509	1
GRHL3	1097	AP	2			0	0.8455	0.8267	0.1292	0.1218		0.1413				0.0284	0.0299	0	0.037	0.3736		0.0563	0.0344	0.0638			0.0785	0.0334	0.355	0.1828	0.063	0.0737	0.0674	0.0823	0	0	0.025	0.0243	0.0537	0.0233	0.0177		0.0537		0	0	0.0199	0.0151	0.1334
GRHL3	1098	AP	1.1			0	0.8455	0.8267	0.1292	0.8782		0.8587				0.9716	0.9701	1	0.963	0.6264		0.9437	0.9656	0.9362			0.9215	0.9666	0.645	0.8172	0.937	0.9263	0.9326	0.9177	1	1	0.975	0.9757	0.9463	0.9767	0.9823		0.9463		1	1	0.9801	0.9849	0.8666
GRHL3	1099	AT	17			0	0.9673	0.5902	0.0614	0.9955	0.7918	0.9533	1	1	0.4466	0.9952	0.9742	1	0.9896	0.9827	0.942	1	0.992	1	1	1	0.9902	0.9972	0.9899	0.9823	0.9913	0.9535	0.9786	0.9961	0.9818	0.9959	0.9956	0.988	0.992	0.9865	0.9872	1	1	1	0.9611	0.9969	0.9973	0.995	1
GRHL3	1100	AT	18			0	0.9673	0.5902	0.0614	0.0045	0.2082	0.0467	0	0	0.5534	0.0048	0.0258	0	0.0104	0.0173	0.058	0	0.008	0	0	0	0.0098	0.0028	0.0101	0.0177	0.0087	0.0465	0.0214	0.0039	0.0182	0.0041	0.0044	0.012	0.008	0.0135	0.0128	0	0	0	0.0389	0.0031	0.0027	0.005	0
STPG1	1103	AP	2			0	0.9418	0.4189	0.0616	0.9218	1	0.9842	0.9825		0.969	0.8348	1	0.9197	0.9398	0.8793	0.9811	0.9615	0.9123	0.9035	0.9903	0.9599	0.8793		0.9668	0.9465	1	0.7301	0.974	0.9644	0.909	0.9852	1	0.9154	0.8619	0.9696	0.9852	1	0.9542	1	0.9312	0.9493	0.9218	0.9295	0.9842
STPG1	1104	AP	3.1			0	0.9418	0	0	0	0	0	0		0	0	0	0	0	0	0	0	0	0	0	0	0		0	0	0	0	0	0	0	0	0	0	0	0	0	0	0	0	0	0	0	0	0
STPG1	1105	AP	1			0	0.9418	0.4189	0.0616	0.0782	0	0.0158	0.0175		0.031	0.1652	0	0.0803	0.0602	0.1207	0.0189	0.0385	0.0877	0.0965	0.0097	0.0401	0.1207		0.0332	0.0535	0	0.2699	0.026	0.0356	0.091	0.0148	0	0.0846	0.1381	0.0304	0.0148	0	0.0458	0	0.0688	0.0507	0.0782	0.0705	0.0158
STPG1	1106	ES	4	3.2	5	0	0.9909	0.8426	0.1844	0.1655	0.7612	0.9634	0.925	0.8096	0.6392	0.8146	0.9305	0.8015	0.9402	0.917	0.8604	1	0.5313	1	0.5794	0.4266	0.6939	0.7184	1	1	0.6939	0.9559	1	1	1	0.8238	0.9523	0.4928	1	0.9451	0.7789	0.9225	0.9315	1	1	1	0.9225	1	0.9107
NIPAL3	1109	AT	14			0	1	0.7322	0.1491	0.2484	0.0686	0.2166	0.1234	0.5088	0.1493	0.4545	0.6068	0.2327	0.4225	0.1729	0.1477	0.2416	0.6725	0.2005	0.1733	0.1012	0.2868	0.2891	0.1914	0.2154	0.443	0.5886	0.3778	0.3724	0.4144	0.345	0.4749	0.253	0.364	0.4145	0.178	0.224	0.6187	0.1678	0.1112	0.2235	0.2653	0.3221	0.6642
NIPAL3	1110	AT	9			0	1	0.0852	0.0128	0.0155	0	0.0176	0.0015	0.006	0.0035	0.0311	0.0472	0.0203	0.0189	0.0139	0.0139	0.0065	0.0064	0.0035	0.0052	0.0036	0.0145	0.0036	0.0085	0.017	0.0129	0.0238	0.0224	0.009	0.0104	0.0182	0.0682	0.0272	0.0056	0.0195	0.0026	0.0098	0.0207	0.0251	0.006	0.011	0.0201	0.0141	0.0236
NIPAL3	1111	AT	15			0	1	0.7497	0.1534	0.7361	0.9314	0.7658	0.8751	0.4852	0.8471	0.5143	0.3459	0.747	0.5586	0.8132	0.8384	0.7519	0.3211	0.796	0.8216	0.8952	0.6986	0.7074	0.8001	0.7677	0.5442	0.3877	0.5998	0.6186	0.5752	0.6368	0.457	0.7198	0.6304	0.566	0.8195	0.7663	0.3606	0.8071	0.8828	0.7654	0.7146	0.6638	0.3122
NIPAL3	1112	ES	3	2	4	0	0.9236	0.2105	0.0295		0.0559	0.093	0.0348	0.0331	0	0.0388	0	0.0388	0	0	0.0288	0	0.019	0.0141	0.0217	0.0455	0.0308	0	0.0372	0.0656	0.0198	0.0488	0.0357	0.0372	0.0367	0.0198	0.0162	0.0471	0	0.0372	0.0308	0.0559		0	0.0357	0	0.0175	0.0207	0.0207
RCAN3	1115	AA	4.1	3	4.2	0	0.9909	0	0	1	1	1	1	1	1	1	1	1	1	1	1	1	1	1	1	1	1	1	1	1	1	1	1	1	1	1	1	1	1	1	1	1	1	1	1	1	1	1	1
RCAN3	1116	ES	4.1:4.2	3	5	0	1	0.2404	0.0138	1	1	1	0.9716	1	1	1	0.9763	1	1	1	0.9778	1	1	1	1	1	1	0.9797	1	1	1	1	1	0.9837	1	1	1	1	1	1	1	1	1	1	0.9855	1	1	1	1
RCAN3	1118	ES	3:4.1:4.2	2	5	0	1	0.0632	0.0084	1	1	0.9889	1	1	1	1	1	1	1	0.9843	1	0.9678	1	1	1	1	1	1	1	1	1	0.9707	1	1	1	1	1	0.9774	0.9806	1	1	1	1	1	1	1	1	0.9771	1
RCAN3	1122	ES	3	2	4.1	0	1	0.213	0.0234	0.9821	1	1	1	0.9683	1	0.9504	0.9756	0.9855	0.9736	1	1	1	1	0.9756	0.9789	1	0.9732	0.9822	1	1	1	0.9669	1	0.983	0.9863	0.9716	1	0.9764	0.9774	0.9804	0.983	1	1	1	0.9848	0.9613	0.9698	1	0.9616
SRRM1	1128	ES	16	15	17	0	1	0.9141	0.112	0.7443	0.6058	0.7417	0.8366	0.5229	0.6919	0.5212	0.4583	0.42	0.727	0.5949	0.6567	0.4583	0.7383	0.5914	0.717	0.6496	0.8713	0.7085	0.814	0.6577	0.5679	0.6298	0.5013	0.5217	0.6752	0.749	0.8408	0.5786	0.5268	0.6953	0.5643	0.6399	0.7005	0.68	0.5317	0.7926	0.4323	0.5707	0.47
SRRM1	1129	AD	12.2	12.1	13	0	0.9982	0.3781	0.0565	0.9035	0.7806	0.8419	0.8345	0.7946	0.7831	0.857	0.7526	0.692	0.6742	0.7922	0.7698	0.8469	0.815	0.7448	0.7631	0.777	0.7892	0.8864	0.8033	0.8951	0.7938	0.7609	0.7113	0.7701	0.807	0.7441	0.7845	0.8356	0.7727	0.9049	0.8208	0.8465	0.8124	0.8329	0.7769	0.807	0.7298	0.8207	0.7414
SRRM1	1130	ES	11	10.2	12.1	0	0.9982	0.3177	0.0382	0.099	0.0123	0.0501	0.0243	0	0.051	0.0329	0.013	0.0197	0	0.0587	0.0315	0.0819	0.0678	0.1127	0.0235	0.051	0.0742	0.0369	0.0156	0.0235	0	0.0115	0.1089	0.1452	0.0768	0.0573	0.0665	0.0785	0.0156	0.0597	0.0418	0.0395	0.1017	0.0563	0.0138	0.0735	0.0343	0.0097	0.1226
SRRM1	1131	AA	10.1	9	10.2	0	0.9964	0.022	0.0018	1	1	1	1	1	1	1	1	1	1	1	1	1	1	1	1	1	1	1	1	1	1	1	1	1	1	1	1	1	1	1	1	1	1	1	1	1	1	1	1
SRRM1	1132	AA	8.1	7	8.2	0	1	0.3358	0.0254	0.979	0.9604	0.8901	0.953	0.9892	0.9543	0.9647	0.9623	0.9639	0.9418	0.9635	0.9865	0.9337	0.9917	0.957	0.9363	0.9773	0.9509	0.9817	0.9409	0.96	0.988	0.9784	0.9749	1	0.9435	0.9536	0.8959	0.974	0.9669	0.9397	0.9667	0.9446	0.9234	0.9717	0.9657	0.9645	0.9627	0.9485	0.9638
SRRM1	1133	ES	04:05:00	3	6	0	0.9964	0.7357	0.0979	0.233	0.0798	0.281	0.0864	0.0233	0.2516	0.0252	0.175	0.1039	0.135	0.1276	0.1372	0.0465	0.0397	0.1826	0.0574	0.168	0.3328	0.0828	0.1706	0.3174	0.0954	0.2229	0.297	0.1059	0.2468	0.1915	0.1632	0.0264	0.0978	0.2369	0.0864	0.1276	0.2738	0.5158	0.1168	0.1458	0.1086	0.085	0.1486
CLIC4	1134	RI	6.2	6.1	6.3	0	1	0.0093	0.0012	1	1	0.9981	1	0.9988	1	1	0.9973	0.9971	1	0.9983	1	1	1	1	1	1	1	1	0.9973	1	1	1	1	1	1	1	1	1	1	1	0.9983	0.9955	1	1	1	1	1	1	0.9974
SYF2	1139	ES	3	2	4	0	1	0.0284	0.0056	0.9977	0.9854	0.997	0.978	0.9966	0.9823	0.9869	0.9959	0.9923	0.9944	0.9902	0.9964	0.9938	0.9846	0.9937	0.9911	0.988	1	0.9949	0.9915	1	1	0.9929	0.992	1	0.9917	1	1	0.9937	0.9915	0.9968	0.9901	1	0.9894	0.9926	0.985	0.9963	0.9915	0.9939	0.9931
C1orf63	1140	AP	2			0	1	0.5022	0.0817	0.8517	0.7611	0.4738	0.7734	0.7394	0.7868	0.9194	0.882	0.6953	0.8447	0.7758	0.9073	0.8656	0.8264	0.8918	0.8502	0.851	0.8065	0.8748	0.8832	0.7752	0.8373	0.742	0.8615	0.8659	0.7962	0.8028	0.7861	0.8568	0.8286	0.7458	0.8603	0.7838	0.8443	0.5788	0.88	0.7754	0.908	0.8616	0.8836
C1orf63	1141	AP	1			0	1	0.5022	0.0817	0.1483	0.2389	0.5262	0.2266	0.2606	0.2132	0.0806	0.118	0.3047	0.1553	0.2242	0.0927	0.1344	0.1736	0.1082	0.1498	0.149	0.1935	0.1252	0.1168	0.2248	0.1627	0.258	0.1385	0.1341	0.2038	0.1972	0.2139	0.1432	0.1714	0.2542	0.1397	0.2162	0.1557	0.4212	0.12	0.2246	0.092	0.1384	0.1164
C1orf63	1145	ES	5.1:5.2:6.1	4.2	6.2	0	0.9982	0.9747	0.2823	0.2198	0	0	0.8927	0.6309	0.7868	0	0	0.625	0	0.7314	0.319	0.1323	0.4682	0	0.8966	0.911	0.274	0.7188	0.9332	0	0.4928	0.7915	0.3724	0.2436	0.5814	0.8134	0.4805	0.834	0.6265	0.6155	0.5028	0.8232	0.62	0.7615	0.2271	0.3148	0.1146	0.7368	0.6268
C1orf63	1146	AA	6.1	4.2	6.2	0	0.9836	0.9578	0.2649	0.3821	0.881	0.733	0.8554	0.4951	0.7957	0.4332	0.1099	0.7782	0.4105	0.7677	0.4054	0.4029	0.4407	0.4895	0.7781	0.8831	0.2574	0.6356	0.8874	0.812	0	0.6868	0.3932	0.5513	0.7704	0.7327	0.6943	0	0.8107	0.3951	0.5966	0	0	0.6046	0.2996	0.3294	0.1218	0.7875	0
C1orf63	1147	ES	5.1:5.2:5.3	4.2	6.2	0	1	0.9538	0.2175	0.2872	0.7006	0.437	0.8077	0.5023	0.6997	0.1767	0.0249	0.6444	0.2026	0.6612	0.2749	0.1764	0.294	0.2636	0.7965	0.8513	0.1907	0.5932	0.844	0.5334	0.2549	0.6783	0.3059	0.3143	0.6032	0.6312	0.5672	0.6955	0.6744	0.5444	0.4921	0.6112	0.3949	0.6409	0.1615	0.4523	0.129	0.7116	0.3734
C1orf63	1148	ES	4.2:5.1	4.1	5.2	0	0.9473	0	0	1	1	1	1	1	1	1	1	1	1	1	1	1	1	1	1	1	1	1	1	1	1	1	1	1	1	1	1	1	1	1	1	1	1	1	1	1	1	1	1
RHCE	1185	ES	07:08:09	6	10	0	0.8145	0.5683	0.0836	1	1	1	1	1	1	1		0.8145	1	1	0.7915			1	1	1	1	1	1	1	1	0.8893	1	1	1	0.82	1	1	1	1		1	1	1	0.6703		1		1
TMEM57	1189	ES	05:06:00	4	7	0	1	0.1851	0.0125	1	1	1	1	1	0.9846	1	0.9794	1	1	1	1	1	1	1	0.9802	1	1	1	1	1	1	1	1	1	1	0.9865	1	1	1	1	1	1	1	1	1	1	1	1	1
TMEM57	1190	ES	2:3:4:5:6	1	7	0	1	0.036	0.0053	1	1	1	1	1	1	1	1	0.9898	1	1	1	1	1	1	1	1	1	1	1	0.9825	1	1	1	1	1	1	1	1	1	1	1	1	1	1	1	1	1	1	1
MAN1C1	1192	AP	4			0	1	0.781	0.1492	0.8178	0.6655	0.6216	0.5994	0.6305	0.6207	0.8899	0.8975	0.9083	0.7961	0.5779	0.6252	0.6208	0.7087	0.7753	0.4786	0.4979	0.5196	0.4696	0.8529	0.5477	0.7424	0.7533	0.5253	0.7711	0.8133	0.6058	0.8093	0.6698	0.551	0.7668	0.6312	0.5398	0.842	0.7415	0.5528	0.7158	0.8331	0.6672	0.8179
MAN1C1	1193	AP	1			0	1	0.781	0.1492	0.1822	0.3345	0.3784	0.4006	0.3695	0.3793	0.1101	0.1025	0.0917	0.2039	0.4221	0.3748	0.3792	0.2913	0.2247	0.5214	0.5021	0.4804	0.5304	0.1471	0.4523	0.2576	0.2467	0.4747	0.2289	0.1867	0.3942	0.1907	0.3302	0.449	0.2332	0.3688	0.4602	0.158	0.2585	0.4472	0.2842	0.1669	0.3328	0.1821
SEPN1	1195	ES	3	2	4	0	1	0.4311	0.0693	0.2155	0.2688	0.2006	0.2014	0.1841	0.2738	0.2079	0.2659	0.3097	0.2138	0.1751	0.3098	0.148	0.1848	0.26	0.2078	0.231	0.3667	0.1939	0.2842	0.1699	0.206	0.3112	0.2297	0.3388	0.3402	0.188	0.4133	0.3904	0.2377	0.3629	0.1911	0.188	0.3036	0.2514	0.1755	0.2159	0.3205	0.2044	0.2428
MTFR1L	1196	AP	4.1			0	1	0.5312	0.0947	0.222	0.2375	0.2608	0.218	0.2599	0.2475	0.3395	0.3172	0.3253	0.3541	0.3027	0.2737	0.3151	0.2887	0.2601	0.2111	0.2679	0.3405	0.269	0.2973	0.2966	0.26	0.327	0.3488	0.2606	0.3346	0.2655	0.3883	0.2792	0.346	0.1845	0.3121	0.2024	0.2347	0.2783	0.2135	0.2737	0.279	0.3334	0.3257
MTFR1L	1197	AP	3.1			0	1	0.2602	0.0454	0.0649	0.0129	0.0424	0.0866	0.0481	0.0675	0.0729	0.091	0.0509	0.0716	0.1138	0.0762	0.0789	0.0958	0.137	0.0589	0.0798	0.1084	0.0582	0.0294	0.0628	0.0491	0.0544	0.2129	0.1018	0.0954	0.0586	0.1487	0.0256	0.1036	0.048	0.0976	0.0493	0	0.1656	0.086	0.1608	0.1208	0.1199	0.0597
MTFR1L	1198	AP	1			0	1	0.8196	0.1398	0.6664	0.7178	0.6548	0.6311	0.5847	0.6717	0.5566	0.5196	0.5735	0.5507	0.5315	0.5244	0.5613	0.5088	0.5407	0.6571	0.5395	0.4401	0.5864	0.6076	0.5526	0.6423	0.581	0.3446	0.5424	0.48	0.602	0.3439	0.6826	0.4614	0.6934	0.5012	0.6702	0.7653	0.4793	0.6437	0.4122	0.566	0.4973	0.5339
MTFR1L	1199	AP	2.1			0	1	0.2103	0.0376	0.0467	0.0318	0.042	0.0643	0.1073	0.0134	0.031	0.0721	0.0504	0.0236	0.052	0.1258	0.0447	0.1067	0.0622	0.0729	0.1128	0.111	0.0864	0.0656	0.0881	0.0486	0.0377	0.0937	0.0952	0.09	0.0739	0.1192	0.0127	0.0889	0.074	0.0892	0.0781	0	0.0768	0.0568	0.1533	0.0342	0.0495	0.0806
MTFR1L	1202	AT	10.5			0	1	0	0	0	0	0	0	0	0	0	0	0	0	0	0	0	0	0	0	0	0	0	0	0	0	0	0	0	0	0	0	0	0	0	0	0	0	0	0	0	0	0	0
MTFR1L	1204	AT	11			0	1	0	0	1	1	1	1	1	1	1	1	1	1	1	1	1	1	1	1	1	1	1	1	1	1	1	1	1	1	1	1	1	1	1	1	1	1	1	1	1	1	1	1
MTFR1L	1205	AA	10.1:10.2:10.3	9	10.4	0	1	0.04	0.0056	1	1	0.9924	1	1	1	1	0.9903	0.992	1	1	1	1	1	0.9926	0.9951	0.9855	1	1	0.971	1	1	1	1	1	1	0.9858	0.9786	1	1	0.9902	0.9851	0.993	1	0.994	1	1	0.9916	1	0.9939
MTFR1L	1207	AA	10.3	9	10.4	0	0.9582	0.2239	0.04	1	1	0.9689	1	1	1	1	0.9404	0.9624	1	1	1	1	1	0.9385	0.9746	0.8783	1	1	0.8311	1	1	1	1	1	1	0.932	0.9149	1	1	0.9397		0.9492		0.9566	1	1	0.9397	1	0.963
MTFR1L	1208	AA	10.1	9	10.2	0	1	0.1658	0.022	0.9602	0.991	0.9819	0.9895	0.9791	0.9608	0.9864	0.936	1	0.9664	1	0.9616	0.9829	0.9154	0.9678	0.9357	0.969	1	0.9836	0.9047	0.9906	0.9644	0.9651	0.948	0.9678	0.9733	0.9798	0.9445	0.9451	0.988	0.9872	0.9772	0.99	1	0.9674	0.9618	1	0.9755	0.9712	0.9201
MTFR1L	1209	AA	10.1:10.2	9	10.3	0	1	0.2458	0.0399	0.874	0.8898	0.8137	0.9004	0.8884	0.9114	0.8855	0.8752	0.8446	0.8887	0.8428	0.923	0.9436	0.9056	0.9102	0.8558	0.9146	0.8973	0.9346	0.878	0.8667	0.87	0.8393	0.8635	0.8863	0.8594	0.8547	0.8173	0.9201	0.8518	0.8761	0.9809	0.8896	0.9726	0.892	0.9126	0.8955	0.8944	0.8517	0.8788
MTFR1L	1210	AA	10.2	9	10.3	0	0.9109	0.8714	0.1303	0.225	0.068	0.0738	0.0881	0.1473	0.2936	0.0951	0.3267	0	0.2177	0	0.3309		0.4799	0.2521	0.2896	0.2559	0	0.1914	0.4323	0.0576	0.1981	0.1609	0.2586	0.2092	0.1465	0.1072	0.2093	0.4026	0.0669	0.0825		0.0771		0.2183	0.299	0	0.1769	0.1439	0.3909
MTFR1L	1211	ME	5|6	4.2	7.2	0	0.9691	0.6907	0.1386	0.4611	0.7404	0.4276	0.6538	0.5621	0.5675	0.7151	0.7051	0.5279	0.5604	0.733	0.7189	0.5824	0.7526	0.5699	0.7727	1	0.5874	0.5517	0.571	0.5028	0.7975	0.6242	0.6672	0.7551	0.641	0.6766	1		0.8139	1	0.5112	0.8735	0.4556	0.5796	0.3603	0.729	0.5285	0.5692	0.6787
MTFR1L	1212	AA	7.1	4.2	7.2	0	0.9945	0.5432	0.08	0.0708	0.0333	0.0645	0.1307	0.0702	0.0407	0.0199	0.0735	0.2429	0.0735	0.1126	0.0853	0.0249	0.0902	0.1443	0.1253	0.1072	0.1953	0.0307	0.2153	0.1654	0	0.1386	0.1167	0.1167	0.1786	0.2345	0.0902	0	0	0.0555	0.1336	0	0.0472	0.1701	0.0502	0.0735	0.1167	0.1167	0.1805
MTFR1L	1213	ES	6	4.2	7.2	0	0.9945	0.608	0.0855	0.0928	0.0879	0.1283	0.1526	0.1445	0.1367	0.0584	0.0534	0.2503	0.205	0.134	0.1611	0.0856	0.1425	0.2358	0.0653	0	0.2621	0.1098	0.2348	0.2661	0.0337	0.1064	0.2438	0.0986	0.131	0.1292	0	0.0447	0.0706	0	0.1859	0.0353	0.0702	0.155	0.1732	0.0406	0.1841	0.1795	0.1888
MTFR1L	1214	ES	5	4.2	7.2	0	0.9982	0.7519	0.0984	0.0805	0.2156	0.0991	0.2538	0.1781	0.172	0.1347	0.1188	0.2718	0.2474	0.2982	0.3293	0.1154	0.3359	0.2902	0.192	0.3556	0.3359	0.1317	0.29	0.2683	0.1206	0.1652	0.3926	0.2521	0.2121	0.2368	0.2965	0.0316	0.2494	0.1085	0.1928	0.2018	0.0595	0.2018	0.1056	0.1022	0.2018	0.2242	0.3296
AUNIP	1219	AT	3.2			0	1	0.3361	0.0551	0.5313	0.5923	0.5156	0.5691	0.6217	0.5486	0.4954	0.5654	0.5343	0.6045	0.4896	0.4133	0.5691	0.4934	0.5636	0.6064	0.5745	0.4625	0.502	0.5337	0.5361	0.5327	0.4893	0.4008	0.5675	0.5335	0.5633	0.4438	0.5802	0.5401	0.4847	0.5063	0.5967	0.6524	0.554	0.5345	0.5782	0.5223	0.5138	0.5568
AUNIP	1220	AT	4			0	1	0.3361	0.0551	0.4687	0.4077	0.4844	0.4309	0.3783	0.4514	0.5046	0.4346	0.4657	0.3955	0.5104	0.5867	0.4309	0.5066	0.4364	0.3936	0.4255	0.5375	0.498	0.4663	0.4639	0.4673	0.5107	0.5992	0.4325	0.4665	0.4367	0.5562	0.4198	0.4599	0.5153	0.4937	0.4033	0.3476	0.446	0.4655	0.4218	0.4777	0.4862	0.4432
STMN1	1221	AP	3			0	1	0.0625	0.008	0.0267	0.0219	0.0128	0.019	0.0206	0.0242	0.0198	0.0245	0.0139	0.0302	0.0073	0.0031	0.0273	0.0282	0.0151	0.0093	0.0088	0.0211	0.0625	0.0129	0.0353	0.0263	0.0118	0.0214	0.0211	0.029	0.022	0.031	0.023	0.0159	0.0186	0.015	0.0216	0.0188	0.0205	0.0178	0.0397	0.0331	0.0198	0.0316
STMN1	1222	AP	4			0	1	0.0259	0.0027	0.0048	0	0.0027	0.0053	0.0016	0	0.0012	0	0	0.0025	0	0.0044	0.0035	0	0.0047	0	0	0.0012	0.0123	0	0.007	0.0015	0	0.0031	0.0011	0.0182	0.002	0.005	0	0	0	0	0	0.007	0.0062	0	0	0.0013	0.0032	0.0032
STMN1	1223	AP	2			0	1	0.0753	0.0091	0.9686	0.9781	0.9839	0.9757	0.977	0.9758	0.9791	0.9734	0.9855	0.9661	0.9927	0.9925	0.9657	0.9703	0.9802	0.9907	0.9912	0.9765	0.9208	0.9871	0.9576	0.9722	0.9882	0.974	0.9744	0.9512	0.9731	0.9632	0.977	0.9832	0.9802	0.985	0.9754	0.9734	0.9724	0.9807	0.9576	0.965	0.977	0.9645
STMN1	1224	AP	1			0	1	0.0184	0.0016	0	0	0.0007	0	0.0008	0	0	0.0021	0.0006	0.0012	0	0	0.0035	0.0015	0	0	0	0.0012	0.0045	0	0	0	0	0.0015	0.0034	0.0017	0.003	0.0008	0	0.0009	0.0011	0	0.003	0.0009	0.0009	0.0015	0.0027	0.0007	0	0.0006
STMN1	1225	AT	9			0	1	0.0189	0.0022	0.0015	0.0031	0.0059	0.0055	0.0023	0.0018	0.0005	0.001	0.0005	0.0028	0	0.0013	0.0016	0.0009	0.0099	0.002	0.0041	0.003	0.0022	0.0076	0.0042	0.0043	0.0019	0.0011	0.0026	0.0189	0.0077	0.0008	0.0044	0.0038	0.0015	0.0006	0.0016	0.0032	0.0036	0.0014	0.0016	0.001	0.0023	0.003
STMN1	1226	AT	8			0	1	0.0189	0.0022	0.9985	0.9969	0.9941	0.9945	0.9977	0.9982	0.9995	0.999	0.9995	0.9972	1	0.9987	0.9984	0.9991	0.9901	0.998	0.9959	0.997	0.9978	0.9924	0.9958	0.9957	0.9981	0.9989	0.9974	0.9811	0.9923	0.9992	0.9956	0.9962	0.9985	0.9994	0.9984	0.9968	0.9964	0.9986	0.9984	0.999	0.9977	0.997
ZNF593	1230	RI	2.2	2.1	2.3	0	1	0.0649	0.0081	0.0134	0.0444	0.0139	0.0091	0.0073	0.0299	0.0157	0.0121	0	0.0183	0.0058	0.0111	0.0084	0.007	0.0039	0.0332	0.0045	0.0222	0	0.0177	0.0209	0.008	0.0071	0.0034	0.0107	0.0114	0	0.0119	0.0012	0.024	0	0.0177	0.017	0.0068	0.0067	0	0.0038	0.0108	0.0117	0.0073
CNKSR1	1231	AP	1.1			0	0.9909	0.5403	0.0699	0.9762	1	0.9729	1	1	0.9861	0.9459	0.9405	0.9639	0.859	0.9438	0.9752	0.9674	1	0.9222	0.9422	0.9776	0.9534	0.9457	0.9624	0.9545	0.9899	0.9689	0.938	0.973	0.9834	0.9578	0.9651	1	0.9272	1	0.9564	1	0.8421	0.9668	0.9737	0.9611	0.9721	0.8851	0.9213
CNKSR1	1232	AP	2.1			0	0.9909	0.5403	0.0699	0.0238	0	0.0271	0	0	0.0139	0.0541	0.0595	0.0361	0.141	0.0562	0.0248	0.0326	0	0.0778	0.0578	0.0224	0.0466	0.0543	0.0376	0.0455	0.0101	0.0311	0.062	0.027	0.0166	0.0422	0.0349	0	0.0728	0	0.0436	0	0.1578	0.0332	0.0263	0.0389	0.0279	0.1149	0.0787
CNKSR1	1236	RI	10.2	10.1	10.3	0	0.9673	0.7415	0.1285	0.3763	0.1434	0.2438	0.1502	0.2287	0.2721	0.2744	0.2508	0.2296	0.3548	0.5238	0.1803	0.5238	0.2516	0.3318	0.1864	0.3548	0.3483	0.4106	0.2996	0.3548	0.247	0.5869	0.3667	0.2481	0.3868	0.2491	0.3392	0.2157	0.3548	0.2683	0.3548	0.1642	0.5238	0.4046	0.2516	0.2683	0.2068	0.3033	0.3557
CNKSR1	1237	AA	10.1	9	10.2	0	0.7782	0.3486	0.0575	1	1	1	1	0.927	0.9397	1	1	0.9069	1	1		1	1	0.9095	1	1	0.9623	1	0.8613	1	0.8316	1	1	1	0.961	0.9354	1	1	1	0.8264	1		1	0.8989		1	0.8761	1	0.9619
CNKSR1	1238	AD	8.2	8.1	9	0	0.9764	0.5894	0.0857	0.2424	0.2252	0.0902	0.1186	0.3202	0.1874	0.2441	0.1724	0.2501	0.1231	0.3499	0.0441	0.193	0.2483	0.0757	0.1186	0.2324	0.1186	0.2032	0.1679	0.1844	0.276	0.2004	0.212	0.2555	0.1889	0.1291	0.1521	0.3002	0.2641	0.2369	0.2555	0.0684	0.139	0.2417	0.355	0.3407	0.2053	0.2172	0.2526
CNKSR1	1239	AA	6.1	5	6.2	0	0.9764	0.1569	0.0208	1	1	0.9868	1	0.9473	1	0.9707	1	1	1	1	1	1	1	1	1	1	1	1	1	0.9616	0.9498	1	1	0.9785	1	0.9775	1	1	1	1	1	1	1	0.9722	0.969	1	1	1	1
CNKSR1	1240	AD	1.2	1.1	2.2	0	0.9636	0.5135	0.0897	0.8409	0.7962	0.8549	0.8489	0.6219	0.8727	0.8105	0.8977	0.8589	0.8389	0.7116	0.7909	0.7366	0.852	0.7497	0.819	0.9005	0.925	0.7979	0.8008	0.7873	0.8681	0.8457	0.8474	0.8044	0.8704	0.7623	0.8044	0.7277	0.8389	0.7247	0.8483	0.7116	0.819	0.7422	0.8962	0.7775	0.9044	0.8424	0.8896
CEP85	1243	RI	14.3	14.2	14.4	0	1	0.0285	0.002	1	1	1	1	1	1	1	1	1	1	1	1	1	1	1	1	1	1	1	1	1	1	1	1	1	1	1	1	1	1	1	1	1	1	1	1	1	1	1	1
CEP85	1244	AA	14.1	13	14.2	0	0.98	0.6803	0.0851	0.1691		0.2214	0.1947	0.4604	0.3259	0.4362	0.2826	0.3559	0.4362	0.5301	0.3495	0.2661	0.3153	0.2602	0.2789	0.45	0.3259	0.2438	0.518	0.1769	0.2005	0.293	0.4057	0.3573	0.2308	0.1884	0.3833	0.2913	0.293	0.2949	0.2438	0.2087	0.4362	0.2759	0.1568	0.4744	0.3099	0.3453	0.2131
CEP85	1245	ES	3	2	4	0	0.9982	0.1461	0.0095	1	1	1	1	1	1	1	1	1	1	1	1	1	1	1	1	1	1	1	1	1	1	1	1	1	1	1	1	0.9794	1	1	1	1	1	1	1	1	1	1	1
SH3BGRL3	1246	RI	2.2	2.1	2.3	0	1	0.0635	0.0085	0.0369	0.0476	0.031	0.0255	0.0213	0.0279	0.0176	0.0132	0.0199	0.0212	0.0184	0.0185	0.0179	0.0178	0.0076	0.0257	0.026	0.013	0.015	0.016	0.0148	0.024	0.0279	0.0276	0.0325	0.022	0.0161	0.0205	0.0139	0.0321	0.0125	0.022	0.0232	0.0489	0.0246	0.0241	0.0375	0.0498	0.0181	0.0232
UBXN11	1249	AT	12.2			0	1	0.8331	0.1384	0.6244	0.6062	0.6749	0.6632	0.493	0.5771	0.5854	0.496	0.6149	0.5384	0.58	0.5434	0.6172	0.5213	0.5419	0.6958	0.6759	0.6454	0.6843	0.7096	0.6238	0.5997	0.6004	0.6376	0.5032	0.6847	0.6045	0.6213	0.5607	0.6066	0.5327	0.6812	0.616	0.5399	0.7538	0.6844	0.5303	0.538	0.6487	0.5753
UBXN11	1250	AT	17			0	1	0.8331	0.1384	0.3756	0.3938	0.3251	0.3368	0.507	0.4229	0.4146	0.504	0.3851	0.4616	0.42	0.4566	0.3828	0.4787	0.4581	0.3042	0.3241	0.3546	0.3157	0.2904	0.3762	0.4003	0.3996	0.3624	0.4968	0.3153	0.3955	0.3787	0.4393	0.3934	0.4673	0.3187	0.384	0.4601	0.2462	0.3156	0.4697	0.462	0.3513	0.4247
UBXN11	1251	ES	10	9	11	0	0.9964	0.3061	0.0452	0.963	0.9886	0.8844	0.9826	0.9582	0.9222	1	0.9207	0.9852	1	0.94	0.9776	0.9051	0.8578	0.9114	0.9813	0.9668	0.8624	0.9484	0.9098	0.8763	1	0.9022	0.8964	1	0.9288	0.8993	0.9474	0.9505	0.9783	0.982	0.9677	0.9758	0.9402	0.8825	0.903	1	1	0.9519	0.926
UBXN11	1252	ES	7:8:9:10	6	11	0	0.9855	0.3816	0.0351	1	1	1	0.9806	1	0.9711	1	1	1	1	1	1	0.8663	1	1	1	0.9847	1	1	1	1	0.909	1	0.9185	1	1	1	1	1	0.9567	1	1	1	1	1	1	1	1	1	1
UBXN11	1254	ES	6	5	7	0	0.9891	0.8422	0.1262	0.4	0.5806	0.3422	0.5527	0.5182	0.5176	0.5321	0.3363	0.5771	0.6383	0.5379	0.6439	0.482	0.6174	0.4138	0.583	0.6695	0.6047	0.6174	0.5652	0.3401	0.4063	0.4258	0.5842	0.4433	0.5543	0.5182	0.6586	0.3319	0.5189	0.5044	0.5481	0.5854	0.4943	0.3949	0.4251	0.5854	0.4632	0.5384	0.5584
UBXN11	1255	ES	3:4:5:6:7:8:9	2	10	0	0.7964	0.984	0.2524	0.0955	0.5483	0.1766	0.5036	1	0.7318	0.7056	0.6196	0.8578		0.7014	0.8802				0.821	0.803	0.4933	0.3032	0.7379	0.1615	1	0.3498	0.2985		0.7749	0.4473	0.6126	0.1448	0.4917	0.5843	0.4077	0.7435	0.192	0.435	0.1791	0.1957	0.5164	1	0.6283
UBXN11	1256	ES	4:5:6:7:8:9	2	10	0	0.9855	0.8827	0.1598	0.6293	0.922	0.6066	0.8812	1	0.9663	0.9202	0.7879	0.9583	1	0.9259	0.9786	0.8633	0.9086	0.86	0.9655	0.9599	0.8842	0.7931	0.9465	0.5582	1	0.5224	0.82	1	0.9321	0.7853	0.8795	0.5851	0.878	0.8379	0.8126	0.9613	0.5206	0.894	0.6389	0.4885	0.7315	1	0.8512
UBXN11	1258	ES	3:4:5:7:8:9	2	10	0	0.8655	0.9881	0.2232	0.2129	0.6495	0.3898	0.633	1	0.7928	0.804	0.8194	0.8764		0.747	0.8813			0.5725	0.8382	0.7652	0.6443	0.3769	0.829	0.5	1	0.5208	0.3062	1	0.8067	0.63	0.6339	0.4361	0.599	0.696	0.4527	0.7689	0.3597	0.7018	0.291	0.2208	0.667	1	0.6836
UBXN11	1259	ES	4:5:7:8:9	2	10	0	0.9873	0.6746	0.1026	0.8049	0.9462	0.8193	0.9197	1	0.9745	0.9498	0.9079	0.963	1	0.9371	0.9777	0.9116	0.9119	0.92	0.9684	0.9487	0.9302	0.8316	0.9637	0.8561	1	0.6847	0.824	1	0.942	0.8749	0.8854	0.856	0.9151	0.8894	0.8339	0.964	0.699	0.959	0.7638	0.5145	0.8176	1	0.879
UBXN11	1260	ES	5:7:8:9	2	10	0	0.7509	1	0.2176	0.5797	0.8135	0.732	0.77	1	0.885	0.7944		0.6484		0.8745	0.7866	0.5587		0.8644	0.811	0.7443	0.745	0.303		0.5744	1	0.2594	0.5451		0.4438	0.7436	0.6455	0.5103	0.7685	0.5727	0.3766	0.9085	0.1076	0.7796	0.3854		0.6627	1	0.4936
UBXN11	1261	ES	03:04:00	2	5	0	0.8564	0.972	0.2082	0.1829	0.3243	0.2242	0.3801	0.5478	0.3814	0.5529	0.8412	0.8299		0.3338	0.6981			0.1873	0.587	0.5778	0.3935	0.5966	0.8679	0.4465	0.6449	0.7976	0.3283		0.8678	0.3994	0.5358	0.4885	0.3588	0.657	0.6342	0.2943	0.8481	0.4517	0.4656			0.7206	0.7185
UBXN11	1262	ES	4	2	5	0	0.9927	0.7382	0.0974	0.7628	0.811	0.6522	0.7904	0.8432	0.8494	0.8422	0.9118	0.942	0.854	0.7016	0.9275	0.9022	0.9538	0.6539	0.8868	0.8772	0.8223	0.9208	0.9714	0.8206	0.7851	0.877	0.8219	0.9447	0.9587	0.7207	0.8253	0.8683	0.7864	0.8648	0.9053	0.754	0.9552	0.8822	0.8593	1		0.8765	0.8895
UBXN11	1263	ES	3	2	4	0	0.9382	0.6878	0.1058	0.0763	0.121	0.1504	0.1779	0.1986	0.1143	0.193	0.3712	0.2545		0.2027	0.1786	0	0.0455	0.121	0.1795	0.1815	0.1418	0.1306	0.1712	0.1616	0.3664	0.4008	0.121	0.1103	0.2401	0.2319	0.2279	0.1454	0.1418	0.2561	0.1768	0.1418	0.2258	0.1168	0.1504	0.2484	0.3826	0.2999	0.2643
LIN28A	1271	RI	4.2	4.1	4.3	0	0.9964	0.5065	0.1075	1	0.7891	1	0.8359	1	0.7438	0.8666	1	0.9219	0.8921	0.9182	0.8786	0.8487	0.6516	1	0.7175	0.9094	0.847	0.9293	0.9425	1	1	0.8107	1	1	0.9383	0.9043	1	1	0.9151	0.9262	0.8297	0.8938	1	0.8876	0.8763	1	1	0.8158	1
DHDDS	1272	AT	6.2			0	1	0.2208	0.0366	0.1288	0.0881	0.067	0.0862	0.0938	0.0993	0.1067	0.0729	0.0783	0.075	0.078	0.1076	0.1033	0.0942	0.0585	0.088	0.0957	0.0324	0.1097	0.0976	0.0887	0.0496	0.0866	0.0482	0.0597	0.0917	0.061	0.0633	0.0771	0.1003	0.0428	0.052	0.0917	0.0803	0.1091	0.1092	0.0966	0.0971	0.1058	0.1176
DHDDS	1273	AT	10.2			0	1	0.4884	0.0697	0.7384	0.804	0.7751	0.782	0.7904	0.8216	0.7695	0.7842	0.789	0.8062	0.7643	0.7762	0.7906	0.8244	0.8699	0.7589	0.7762	0.827	0.7442	0.7626	0.7463	0.8386	0.7421	0.7987	0.7874	0.746	0.8352	0.7543	0.8277	0.7491	0.8056	0.7876	0.7879	0.7738	0.6989	0.7379	0.686	0.7102	0.6947	0.7175
DHDDS	1274	AT	7			0	1	0.3097	0.0537	0.1328	0.1079	0.1579	0.1318	0.1158	0.0791	0.1237	0.1429	0.1328	0.1188	0.1577	0.1163	0.106	0.0814	0.0716	0.1531	0.1282	0.1406	0.1462	0.1398	0.165	0.1118	0.1713	0.1531	0.1529	0.1623	0.1039	0.1824	0.0952	0.1506	0.1516	0.1605	0.1204	0.1459	0.192	0.1528	0.2173	0.1927	0.1995	0.1649
DHDDS	1275	AA	10.1	9	10.2	0	1	0.4765	0.0702	0.186	0.1717	0.144	0.2745	0.3346	0.3006	0.1846	0.2637	0.1413	0.1947	0.1947	0.1621	0.1691	0.2363	0.1587	0.2075	0.1947	0.2125	0.2072	0.136	0.1278	0.2184	0.2313	0.1129	0.2015	0.2192	0.3312	0.2438	0.2214	0.0882	0.1551	0.1429	0.2192	0.2661	0.1717	0.2835	0.2249	0.2015	0.2438	0.1987
DHDDS	1276	ES	6.1	5	8	0	1	0.2978	0.0382	0.9109	0.825	0.9529	0.8634	0.9182	0.8899	0.9527	0.9165	0.9558	0.9129	0.953	0.8937	0.932	0.9246	0.9751	0.9047	0.8508	0.9683	0.9568	0.9322	0.8634	0.9574	0.945	0.9755	0.9784	0.9301	0.9208	0.9288	0.9657	0.9813	0.9296	0.9716	0.9808	0.9053	0.9278	0.9289	0.9191	0.9527	0.9489	0.9806
DHDDS	1277	ES	5	4.2	6.1	0	1	0.1213	0.0089	1	0.9269	1	1	1	1	1	0.9827	1	1	1	1	1	1	1	1	1	1	1	1	1	1	0.9895	1	1	1	1	1	1	1	1	1	1	1	1	1	1	1	1	1
DHDDS	1278	AA	4.1	3	4.2	0	1	0.2839	0.0472	0.0433	0.0266	0.0352	0.0381	0.065	0.0204	0.0831	0.0862	0.081	0.0285	0.077	0.062	0.0487	0.0372	0.0746	0.062	0.1274	0.0634	0.0133	0.1113	0	0.0228	0.1527	0.0877	0.144	0.0458	0.0708	0.1369	0.0407	0.2454	0.0432	0.0694	0.1063	0.0575	0.0702	0.0177	0.0869	0.0446	0.0536	0
RPS6KA1	1279	AP	3			0	0.9964	0.2981	0.0442	0.0226	0.012	0.0326	0.0113	0.0062	0.0259	0	0	0.013	0	0.0395	0.0277	0.0231	0.0398	0.0202	0.0208	0.0239	0.0771	0	0.05	0.034	0.0448	0.0302	0.07	0.2222	0.0342	0	0.0498	0.0233	0.0635	0	0.0151	0.0205	0.0476	0.065	0.1704	0.0547	0.0164	0.017	0
RPS6KA1	1280	AP	1			0	0.9964	0.9624	0.2161	0.8318	0.4903	0.9068	0.3018	0.4621	0.2469	0.6322	0.6551	0.2201	0.5762	0.3201	0.2249	0.4808	0.6715	0.7741	0.219	0.2316	0.6635	0.2035	0.5129	0.3848	0.8099	0.57	0.7051	0.7294	0.7237	0.5894	0.408	0.775	0.5165	0.7895	0.5099	0.216	0.5669	0.5592	0.4423	0.8219	0.7163	0.2304	0.2451
RPS6KA1	1281	AP	7			0	0.9964	0.8789	0.1924	0.1261	0.4562	0.0606	0.5642	0.4355	0.6291	0.3678	0.3082	0.7444	0.333	0.5497	0.6281	0.4366	0.2659	0.171	0.6128	0.6261	0.2004	0.6071	0.4084	0.3939	0.1298	0.3478	0.156	0.019	0.203	0.3236	0.4993	0.1817	0.3109	0.1518	0.3449	0.6858	0.3445	0.3137	0.3648	0.0696	0.1826	0.5674	0.6416
RPS6KA1	1282	AP	5			0	0.9964	0.3556	0.0622	0.0195	0.0415	0	0.1227	0.0961	0.0981	0	0.0366	0.0224	0.0908	0.0906	0.1193	0.0595	0.0228	0.0348	0.1474	0.1184	0.059	0.1894	0.0287	0.1873	0.0154	0.052	0.0689	0.0294	0.0392	0.087	0.0429	0.0201	0.1092	0.0587	0.13	0.0777	0.041	0.0621	0.0226	0.0538	0.0847	0.1851	0.1133
RPS6KA1	1286	AA	16.1	15	16.2	0	1	0.093	0.0092	0.9892	1	1	1	0.9909	1	1	1	1	1	1	0.9855	0.9844	0.9853	1	1	0.9887	0.9897	1	1	1	1	1	0.9915	1	0.9809	0.9851	1	1	1	1	0.9877	0.967	1	0.9739	1	0.9918	1	1	1
RPS6KA1	1287	ES	12	11	13	0	0.9982	0.0714	0.0111	0.0229	0.0275	0.007	0.0037	0.0173	0.004	0.0173	0	0.0081	0	0	0	0	0.0202	0.0035	0.0126	0.0109	0.0078	0.0066	0.0394	0.0153	0.0052	0.0058	0	0.0104	0.0226	0.0056	0.0116	0.0055	0.0084	0.0093	0	0.0132	0.014	0.0041	0	0.0092	0	0.0187	0.0185
RPS6KA1	1289	ES	8	4	9	0	0.9964	0.1307	0.0139	0.9387	0.9866	1	0.9935	1	1	1	0.9877	0.9897	1	1	1	0.9588	0.9834	1	1	1	1	1	0.9896	1	1	0.9905	0.9816	1	0.9809	0.9924	0.9828	0.9913	1	1	1	0.9902	1	1	0.9829	0.975	1	1	1
RPS6KA1	1290	ES	08:09:00	4	10	0	0.9964	0.0297	0.0037	1	1	1	1	1	1	1	1	1	1	1	1	1	1	1	1	1	1	1	1	1	1	1	1	1	1	1	1	1	1	1	1	1	1	1	1	1	1	1	1
RPS6KA1	1292	ES	2	1	4	0	0.8964	0.0992	0.0184	0	0	0	0.0289	0	0.0668		0.0486	0	0	0.0268	0.0535	0	0	0.0054	0.0233	0.0107	0	0	0.0195	0	0	0.0249	0.0226	0	0	0.0249	0	0.0249	0	0	0	0		0	0	0	0	0
ARID1A	1293	AP	2.1			0	0.96	0.8728	0.1272	0.0329	0	0.0886	0.0609	0.161	0	0	0	0.1353	0.1097	0	0	0.0514	0.1161	0.0425	0	0.0355	0.1327	0	0	0.0818	0.0251	0.1576	0	0.0609	0.0601	0	0	0	0	0.0277	0	0.0822	0.1266	0	0.0399	0	0	0.1089	0.2911
ARID1A	1295	AP	1			0	0.96	0.8728	0.1272	0.9671	1	0.9114	0.9391	0.839	1	1	1	0.8647	0.8903	1	1	0.9486	0.8839	0.9575	1	0.9645	0.8673	1	1	0.9182	0.9749	0.8424	1	0.9391	0.9399	1	1	1	1	0.9723	1	0.9178	0.8734	1	0.9601	1	1	0.8911	0.7089
ARID1A	1296	AA	18.1	17	18.2	0	1	0.0481	0.0061	1	1	1	1	0.9908	0.9599	1	1	1	1	1	1	1	1	1	1	1	1	1	1	1	1	0.9946	1	1	1	1	1	1	0.993	1	1	1	1	1	1	1	0.9929	1	1
ARID1A	1297	ES	18.1:18.2	17	19	0	1	0.0709	0.0038	1	1	1	1	1	1	1	1	1	1	1	1	1	1	1	1	1	1	1	1	1	1	1	1	1	1	1	1	1	1	1	1	1	1	0.9963	1	1	1	1	0.9855
PIGV	1299	AP	1			0	0.9891	0.7756	0.1664	0.3772	0.6229	0.3528	0.3622	0.1712	0.2987	0.5118	0.4993	0.302	0.5648	0.2746	0.6023	0	0.4622	0.1278	0.1635	0.3306	0.2286	0.4177	0.0726	0.144	0.3464	0.1418	0.5183	0.6301	0.3528	0.0865	0.4969	0	0.4845	0.2856	0.193	0.1851	0.3852	0.1986	0.4402	0.2015	0.1851	0.2886	0.4378
PIGV	1300	AP	2.1			0	0.9891	0.7756	0.1664	0.6228	0.3771	0.6472	0.6378	0.8288	0.7013	0.4882	0.5007	0.698	0.4352	0.7254	0.3977	1	0.5378	0.8722	0.8365	0.6694	0.7714	0.5823	0.9274	0.856	0.6536	0.8582	0.4817	0.3699	0.6472	0.9135	0.5031	1	0.5155	0.7144	0.807	0.8149	0.6148	0.8014	0.5598	0.7985	0.8149	0.7114	0.5622
PIGV	1301	RI	4.2	4.1	4.3	0	1	0.2351	0.0198	0.9862	1	0.969	0.9836	0.9786	1	1	1	1	0.9735	1	1	1	0.9806	1	0.9878	1	0.9877	0.9672	0.9709	0.9403	1	0.9745	1	1	0.9866	0.9747	0.9825	1	0.9766	0.9899	1	1	1	0.9707	0.9898	0.9869	1	0.9804	0.9602
PIGV	1302	AD	2.3	2.2	3	0	0.94	0.8489	0.19	1		0.7652	0.7446	1	0.6317	0.2154	0.706	1	0.3752	0.4356	0.3084		0.4617	0.5932	0.5543	0.5627	1	1	1	0.5932	0.7201	1	0.4356	0.8459	0.7978	1	1		1	0.8373	1	0.5456	1	0.6984	0.8169	0.7942	0.7446	0.7201	0.5681
PIGV	1303	AD	2.2:2.3	2.1	3	0	0.9727	0.6843	0.1311	0.3166		0.3955	0.204	0.4524	0.216	0.2686	0.3852	0.3494	0.121	0.0913	0.3252	0.2924	0.222	0.182	0.264	0.2469	0.4478	0.3406	0.2648	0.2807	0.2	0.1867	0.0976	0.5242	0.4376	0.2526	0.6738	0.3692	0.2519	0.3835	0.2561	0.2332	0.3826	0.4768	0.4579	0.2799	0.3891	0.2645	0.3319
PIGV	1304	AD	2.2	2.1	3	0	0.8091	0.6728	0.1317	0		0.5307	0.1116		0.1705	0.6012	0.357	0.2701	0.2914	0.1586	0.5069		0.2763	0.1595	0.2354	0.2386	0	0	0	0.2914	0.1233		0.1498	0.2914		0			0	0.1799	0	0.3242	0	0.2784	0.2152	0.1312		0.1379	0.3642
ZDHHC18	1305	AP	2			0	1	0.1284	0.0127	0	0	0	0	0	0	0	0	0	0	0	0	0.0485	0.0341	0	0.0438	0	0	0	0	0	0	0.048	0	0	0	0	0	0	0.0531	0	0	0	0	0	0	0	0	0	0
ZDHHC18	1306	AP	1			0	1	0.1284	0.0127	1	1	1	1	1	1	1	1	1	1	1	1	0.9515	0.9659	1	0.9562	1	1	1	1	1	1	0.952	1	1	1	1	1	1	0.9469	1	1	1	1	1	1	1	1	1	1
GPN2	1307	AP	1.1			0	0.9982	0.7135	0.0701	1	1	0.9651	0.9537	0.9774	0.8375	0.9725	0.9542	0.9134	0.9542	0.849	0.9425	1	0.963	0.957	1	0.9067	1	0.9801	0.859	0.9783	0.9772	0.9706	0.8801	0.8892	0.968	0.9062	0.9516	1	0.8697	1	0.9626	0.8966	0.9613	0.8319	0.9663	0.9423	0.9505	0.9298	0.8516
GPN2	1308	AP	3			0	0.9982	0.7135	0.0701	0	0	0.0349	0.0463	0.0226	0.1625	0.0275	0.0458	0.0866	0.0458	0.151	0.0575	0	0.037	0.043	0	0.0933	0	0.0199	0.141	0.0217	0.0228	0.0294	0.1199	0.1108	0.032	0.0938	0.0484	0	0.1303	0	0.0374	0.1034	0.0387	0.1681	0.0337	0.0577	0.0495	0.0702	0.1484
GPN2	1311	RI	1.2	1.1	1.3	0	0.9982	0.0164	0.0015	1	1	1	1	1	1	1	1	1	1	1	1	1	1	1	1	1	1	1	1	0.9862	1	1	1	1	1	0.9867	1	1	1	1	1	1	1	1	1	1	1	1	1
SLC9A1	1312	AT	12			0	1	0.2222	0.0326	0.9504	0.9511	0.8831	0.9594	0.9723	0.9703	0.9609	0.9302	0.9508	0.9646	0.9625	0.9651	0.9574	0.9437	0.9624	0.9569	0.9498	0.9574	0.9375	0.9552	0.9633	0.9696	0.9561	0.9452	0.9258	0.9446	0.9712	0.9049	0.9545	0.9462	0.9639	0.9659	0.9332	0.9614	0.9135	0.9332	0.9337	0.9664	0.9176	0.9553
SLC9A1	1313	AT	5.2			0	1	0.2222	0.0326	0.0496	0.0489	0.1169	0.0406	0.0277	0.0297	0.0391	0.0698	0.0492	0.0354	0.0375	0.0349	0.0426	0.0563	0.0376	0.0431	0.0502	0.0426	0.0625	0.0448	0.0367	0.0304	0.0439	0.0548	0.0742	0.0554	0.0288	0.0951	0.0455	0.0538	0.0361	0.0341	0.0668	0.0386	0.0865	0.0668	0.0663	0.0336	0.0824	0.0447
SLC9A1	1314	ES	2	1	3	0	1	0.0434	0.0077	0.9859	0.9872	1	0.9828	0.9813	1	0.9911	1	1	1	0.9944	0.9893	0.9906	0.9861	1	0.9936	0.9915	0.9843	0.9846	1	1	1	1	1	1	0.99	1	1	0.99	1	1	1	1	0.9648	1	0.9843	1	1	0.9921	1
WDTC1	1317	RI	16.2	16.1	16.3	0	1	0.0087	0.0009	1	1	1	1	0.993	1	1	1	1	1	1	1	1	1	1	1	1	1	1	1	1	1	1	1	1	1	1	1	1	1	1	1	1	1	1	1	1	1	1	1
WDTC1	1318	AA	15.1	14	15.2	0	1	0.1609	0.0235	0.9451	0.965	0.9187	0.9699	0.972	0.9766	0.9652	0.9745	0.9752	0.9694	0.9844	0.9644	0.9784	0.9747	0.9647	0.9765	0.9844	0.9812	0.9866	0.99	0.9591	0.9642	0.9717	0.9828	0.9652	0.9345	0.9586	0.9234	1	0.9571	0.9454	0.9834	0.9775	1	0.9692	0.9576	0.947	0.945	0.9489	0.9137
WDTC1	1319	AA	11.1	10	11.2	0	1	0.1927	0.0285	0.9419	0.9805	0.9363	0.9419	0.923	0.9785	1	0.9053	0.9276	0.9871	0.978	0.9807	0.9289	0.8823	0.9705	0.9366	0.9653	0.9574	0.9584	0.9094	0.9762	0.9587	0.9337	0.9631	0.9427	0.9562	0.9674	0.9122	0.9831	0.9347	0.9175	0.9152	0.9457	1	0.9732	0.9168	0.9141	0.9516	0.9574	0.952
SYTL1	1320	AP	1			0	1	0.916	0.1121	0.7301	0.9297	0.7714	0.8767	0.8857	0.8861	0.8126	0.776	0.7885	0.8091	0.7942	0.8995	0.8304	0.8541	0.8226	0.8907	0.8393	0.7737	0.8117	0.7614	0.7376	0.8123	0.7718	0.7622	0.6884	0.6836	0.8544	0.7199	0.9082	0.7607	0.8188	0.7965	0.8558	0.7624	0.5538	0.8035	0.7799	0.6816	0.692	0.5675
SYTL1	1321	AP	2.1			0	1	0.916	0.1121	0.2699	0.0703	0.2286	0.1233	0.1143	0.1139	0.1874	0.224	0.2115	0.1909	0.2058	0.1005	0.1696	0.1459	0.1774	0.1093	0.1607	0.2263	0.1883	0.2386	0.2624	0.1877	0.2282	0.2378	0.3116	0.3164	0.1456	0.2801	0.0918	0.2393	0.1812	0.2035	0.1442	0.2376	0.4462	0.1965	0.2201	0.3184	0.308	0.4325
SYTL1	1322	AA	6.1	5	6.2	0	1	0.2847	0.043	0.8681	0.8795	0.8634	0.9578	0.8462	0.9035	0.9028	0.9055	0.8357	0.9305	0.9383	0.8999	0.9515	0.8756	0.9322	0.9306	0.9514	0.935	0.9342	0.9158	0.931	0.9161	0.8454	0.8611	0.8931	0.9315	0.9448	0.868	0.9253	0.8535	0.9321	0.8994	0.9094	0.9846	0.931	0.8452	0.9352	0.88	0.931	0.9022
MAP3K6	1323	ES	3	2	4	0	0.9582	0.8092	0.1317	0.5432	0.7491	0.8791	0.7756	0.7822	0.6823	0.5645	0.8383	0.8152	0.8397	0.8803	0.8085	0.6592	0.3793	0.6324	0.6918	0.7186	0.7795	0.5464	0.575	0.6387	0.5238	0.7186	0.7586	0.8627	0.8726	0.7924	0.7237	0.7916	0.7695	0.7971	0.672	0.7695		0.6358	0.5989	0.775	0.65	0.6024	0.7401
MAP3K6	1324	RI	1.2	1.1	1.3	0	0.94	0	0	1	1	1	1	1	1	1	1	1	1	1	1	1	1	1	1	1	1	1	1	1	1	1	1	1	1	1	1	1	1	1	1	1		1	1	1	1	1	1
FCN3	1325	ES	4	3	5	0	0.7909	0.5789	0.0815	0.8358	0.8403		0.8865	0.9341	0.8749	0.8533	0.8197	0.8511	0.7273	0.8593	0.8731	0.7755	0.7179	0.9252	0.8918	0.8604	0.8904	1	0.8999	0.9168		0.8889	0.9106	1	0.916	0.8667	0.8675	0.8358	0.6857	0.6857	0.9076	0.8869		0.8501	1		0.7755	0.8544	0.8641
CD164L2	1326	AT	3.4			0	0.8618	0.3443	0.0203	0	0	0	0	0	0	0	0	0	0	0	0	0		0.0821	0	0.049	0		0	0		0	0	0	0	0	0		0	0	0	0	0	0	0		0	0	0
CD164L2	1327	AT	4.3			0	0.8618	0.3443	0.0203	1	1	1	1	1	1	1	1	1	1	1	1	1		0.9179	1	0.951	1		1	1		1	1	1	1	1	1		1	1	1	1	1	1	1		1	1	1
CD164L2	1328	RI	4.2	4.1	4.3	0	0.9273	0.7391	0.2057	0.8704	0.6401	0.822	0.5574	1	0.512	0.6566	0.7318	0.6736	1	0.8353	0.5991	1	1	0.9304	0.6125	0.5581	0.718		0.7266	0.471	0.6773	0.8792	0.595	1	0.5669	0.6861	0.6912	0.5832	0.6593	0.8484	0.7258	0.5102	1	0.9161	1	1	0.9009	0.3588	0.8903
WASF2	1330	ES	8	7	9	0	1	0.0379	0.0028	1	1	1	1	1	1	1	1	0.9973	1	0.9944	1	1	1	1	1	1	1	0.9974	1	1	0.9946	0.9953	1	1	0.9979	1	1	1	1	1	0.9977	1	0.9904	0.9983	0.9991	0.9965	1	0.998	0.9941
AHDC1	1331	ES	00:03:04.100000	2	4.2	0	0.9218	0.9346	0.213	0.6909	0.0654	0.6032	0.6004	0.5751	0.2743	0.6348	0.6616	0.8778	0.654	0.7091	0.7766	0.2515	0.4238	0.8116	0.2945	0.3127	0.3357	0.3739	0.2396	0.1624	1	1		0.7042	0.8028	0.5897	0.3934	0.6802	0.7614	0.5871	0.8319	0.5038	1	0.6615	0.726	0.6625	0.7875	0.4684	0.639
FGR	1332	AP	3			0	0.8018	0.7246	0.1129		0.1776	0.1854	0.1061	0.0689	0.244	0.1707		0.3111	0.105	0.2554	0.135	0.0596	0.109	0.186	0.1935	0.1978	0.012	0.1093	0.1083	0.1014	0.1222	0.1557	0	0	0.3373	0.2254	0.1646	0	0.2493	0.0735	0.1665	0.2025	0.3818	0.0878	0.1589	0.3155		0.2211	0.117
FGR	1333	AP	5.1			0	0.8018	0.367	0.062		0.0927	0.1251	0.0448	0.0233	0.0458	0		0	0	0.0414	0.054	0.1341	0.1472	0.0837	0.0336	0.0391	0.0649	0.0403	0.0975	0.0587	0.0825	0.1682	0.1079	0	0.1139	0.0716	0.0247	0	0	0	0.0482	0.0195	0	0	0.0429	0		0.0249	0.1579
FGR	1334	AP	1			0	0.8018	0.8877	0.144		0.6608	0.6895	0.7771	0.8811	0.6366	0.4762		0.6199	0.7321	0.7032	0.7721	0.7756	0.6591	0.6341	0.7043	0.5609	0.9045	0.7579	0.7383	0.7949	0.7953	0.5793	0.8921	1	0.5489	0.7029	0.7823	1	0.6955	0.5465	0.73	0.6994	0.5523	0.7759	0.7981	0.6845		0.6682	0.7251
FGR	1335	AP	2			0	0.8018	0.5225	0.0878		0.0689	0	0.072	0.0267	0.0736	0.3532		0.069	0.1629	0	0.0388	0.0308	0.0846	0.0962	0.0686	0.2022	0.0186	0.0925	0.056	0.045	0	0.0967	0	0	0	0	0.0284	0	0.0553	0.38	0.0554	0.0786	0.0658	0.1363	0	0		0.0858	0
FGR	1336	ES	7.2:8	7.1	9	0	0.9909	0.0879	0.0069	1	0.9972	1	1	1	1	1	1	1	1	1	1	1	0.9666	1	0.998	1	1	1	1	0.9902	1	1	0.9591	1	1	1	0.9882	1	1	1	1	1	1	1	1	1	1	1	1
IFI6	1337	AD	2.3	2.2	3	0	0.9564	0.4975	0.0634	0.1315	0.1424	0.3056	0.1117	0.1744	0.1935	0.2322	0.1279	0.0773	0.2009	0.1636	0.1401	0.1192	0.1848	0.1549	0.1517	0.2238	0.2604	0.0402	0.1234	0.1996	0.125	0.2282	0.1948	0.2268	0.2038	0.2009	0.238	0.2604	0.1379	0.1983	0	0.1192	0.1912	0.1725	0.1549	0.3346		0.122	0.1707
IFI6	1338	AD	2.2:2.3	2.1	3	0	0.9982	0.196	0.0226	0.0472	0.0378	0.0868	0.0154	0.0547	0.0439	0.0638	0.0462	0.0133	0.0369	0.0514	0.0311	0.0397	0.0808	0.0391	0.0377	0.0631	0.0674	0.0112	0.03	0.0572	0.0412	0.0863	0.0522	0.0594	0.0594	0.0615	0.0613	0.0625	0.0647	0.0504	0	0.0298	0.068	0.0463	0.0328	0.0789	0.0293	0.0214	0.0666
IFI6	1339	AD	2.2	2.1	3	0	0.9982	0.3439	0.0411	0.2638	0.2117	0.1898	0.1192	0.2293	0.1748	0.2024	0.2455	0.1636	0.1637	0.2278	0.177	0.242	0.2898	0.1793	0.1974	0.2112	0.1708	0.2477	0.188	0.1995	0.2348	0.2521	0.187	0.1821	0.2007	0.2284	0.1955	0.1665	0.3128	0.1906	0.2131	0.2124	0.2467	0.195	0.1711	0.1438	0.2131	0.1578	0.2715
FAM76A	1340	AT	10			0	1	0.3157	0.0553	0.8563	0.8844	0.891	0.8924	0.9765	0.8812	0.844	0.9555	0.948	0.8792	0.8631	0.8746	0.9174	0.8771	0.9223	0.9268	0.8887	0.8175	0.9329	0.8528	0.8766	0.9198	0.9048	0.9375	0.8654	0.8548	0.8716	0.921	0.8771	0.8801	0.9595	0.8867	0.8545	0.9808	0.9455	0.9531	0.8891	0.9509	0.795	0.895
FAM76A	1341	AT	9.2			0	1	0.3157	0.0553	0.1437	0.1156	0.109	0.1076	0.0235	0.1188	0.156	0.0445	0.052	0.1208	0.1369	0.1254	0.0826	0.1229	0.0777	0.0732	0.1113	0.1825	0.0671	0.1472	0.1234	0.0802	0.0952	0.0625	0.1346	0.1452	0.1284	0.079	0.1229	0.1199	0.0405	0.1133	0.1455	0.0192	0.0545	0.047	0.1109	0.0491	0.205	0.105
FAM76A	1342	ES	7	6	8	0	0.9982	0.4986	0.0914	0.7545	0.922	0.8498	0.9537	0.8009	0.7926	0.7554	0.6565	0.8231	0.7402	0.7012	0.6961	0.8009	0.6513	0.624	0.8294	0.898	0.9397	0.8702	0.8009	0.8254	0.8386	0.8341	0.819	0.8058	0.9742	0.8073	0.9075	0.7511	0.7746	0.8294	0.6747	0.6679	0.7756	0.8526	0.6948	0.7154	0.8058	0.9477	0.7788
FAM76A	1343	ES	5	4	6	0	1	0.1461	0.0152	1	1	1	1	1	1	1	1	1	1	1	1	1	1	1	0.9438	1	1	0.9684	0.9426	1	1	0.9657	1	1	1	0.9652	0.9526	1	1	1	0.9691	1	1	0.9549	0.9853	0.957	1	1	1
FAM76A	1344	ES	3	2	4	0	0.9945	0.8864	0.1529	0.4382	0.4571	0.4356	0.5815	0.4426	0.4311	0.36	0.4099	0.3165	0.3018	0.531	0.6708	0.2578	0.5436	0.3758	0.3852	0.3548	0.2953	0.3982	0.4188	0.4724	0.5103	0.428	0.4099	0.4911	0.5194	0.5158	0.6346	0.4648	0.5711	0.2415	0.2595	0.428	0.4648	0.5366	0.2884	0.5009	0.6494	0.3639	0.5732
PPP1R8	1345	ES	4	3	5	0	1	0.0518	0.0077	0.9928	0.9923	0.991	1	0.9769	0.9893	0.9932	1	1	1	1	0.9897	1	0.9844	0.9866	1	1	0.9824	0.9891	0.9861	0.9936	1	1	0.9922	1	0.9962	0.993	1	0.9585	0.9947	1	1	1	0.9888	1	0.9979	0.9947	0.9933	1	1
PPP1R8	1346	AD	1.3	1.2	2	0	0.8036	0.7934	0.1343	0.7719	0.7476	0.8556		0.8088		0.8088	0.8747	1	0.8088	0.7476					0.7719			1	1	0.8354	1	1	1	1	0.8462			0.679	0.8556	1			0.8462	1	1	1	0.7719	1	0.7057
PPP1R8	1347	AD	1.2:1.3	1.1	2	0	1	0.4539	0.0719	0.0736	0.0906	0.1669	0.0409	0.1891	0.1566	0.1175	0.4539	0.2232	0.2421	0.0799	0.0691	0.068	0.0204	0.0696	0.0762	0.0154	0.1111	0.1882	0.1621	0.2038	0.2624	0.2916	0.2435	0.1595	0.1725	0.2909	0.1352	0.1508	0.1659	0.2625	0.0261	0.0958	0.2273	0.1865	0.1863	0.1451	0.1519	0.2219	0.1828
PPP1R8	1348	AD	1.2	1.1	2	0	0.9945	0.3348	0.0541	0.0388	0.0325	0.0482	0	0.0636	0	0.0934	0.172	0	0.0975	0.0407	0.0606	0.0562	0.1012	0.1079	0.0621	0.0985	0	0	0	0.0588	0	0	0	0	0.1974	0	0	0.1331	0.0674	0	0.1065	0.054	0.1894	0	0	0	0.0584	0.176	0.1585
THEMIS2	1349	RI	4.2	4.1	4.3	0	0.9982	0.1163	0.0168	0.9337	0.9826	1	1	0.9917	1	1	1	1	1	0.9863	0.9884	0.9904	1	1	0.996	0.9799	0.984	0.9851	1	1	0.9794	0.978	1	1	1	0.9933	0.9855	1	1	1	0.9862	0.976	1	1	1	1	1	0.9884	1
THEMIS2	1350	ES	4.1:4.2:4.3	3	5	0	1	0.2159	0.0342	1	1	0.9714	0.989	0.9115	0.9718	0.9621	0.9681	0.9889	1	0.9869	0.971	1	0.936	0.9916	0.982	0.977	1	0.9653	0.9661	0.9725	1	1	0.9542	1	1	0.9875	0.9375	1	0.9814	0.982	0.9703	0.954	1	0.9529	0.9849	0.9531	1	0.9599	0.8953
THEMIS2	1352	ES	3:4.1:4.2:4.3	2	5	0	1	0.4417	0.07	0.9004	0.935	0.9173	0.9792	0.7528	0.922	1	0.9119	0.9682	0.9811	0.9271	0.9192	0.9213	0.9368	0.9561	0.9645	0.9584	0.9826	0.8964	0.9372	0.8399	0.9796	0.9406	0.912	1	0.9326	0.9554	0.9115	0.908	0.9635	0.8646	0.9346	0.9255	0.8578	0.8518	0.9286	0.9499	0.7907	0.9513	0.8881
RPA2	1357	RI	1.3	1.2	1.4	0	0.9982	0.0952	0.0142	0.0162	0	0.0142	0	0.0075	0	0	0	0.0154	0.0175	0.0181	0	0.0291	0.0062	0.0134	0.0051	0.0047	0.0038	0.0079	0.0149	0.0069	0.0044	0.0253	0	0	0.0083	0.0112	0.0075	0.0112	0.027	0.0207	0.011	0.0062	0.0169	0.0383	0.0029	0.0296	0	0.0204	0.01
RPA2	1359	AD	1.2	1.1	1.4	0	1	0.085	0.0111	0.9913	1	1	1	1	0.9783	1	1	1	1	1	0.9813	1	1	0.9754	0.9931	0.9878	1	1	1	1	1	1	0.9864	0.9813	1	0.9859	1	1	1	0.9543	1	0.9858	1	1	1	1	0.9826	1	1
SMPDL3B	1360	AT	7.2			0	0.9909	0.5578	0.0975	0.2492	0.1601	0.1052	0.1573	0.3849	0.1296	0.3802	0.353	0.2323	0.3643	0.2077	0.1104	0.3231	0.1314	0.2393	0.1315	0.1469	0.1847	0.2309	0.0734	0.15	0.0949	0.2444	0.1981	0	0.2495	0.1955	0.1786	0.3376	0.2343	0.2017	0.1738	0.1598	0.4336	0.2028	0.255	0.2944	0.2038	0.2251	0.1608
SMPDL3B	1361	AT	8			0	0.9909	0.5578	0.0975	0.7508	0.8399	0.8948	0.8427	0.6151	0.8704	0.6198	0.647	0.7677	0.6357	0.7923	0.8896	0.6769	0.8686	0.7607	0.8685	0.8531	0.8153	0.7691	0.9266	0.85	0.9051	0.7556	0.8019	1	0.7505	0.8045	0.8214	0.6624	0.7657	0.7983	0.8262	0.8402	0.5664	0.7972	0.745	0.7056	0.7962	0.7749	0.8392
SMPDL3B	1362	ES	4	3.2	5	0	0.9673	0.0391	0.0033	1	1	1	1	1	1	1	1	0.9879	1	1	1	1	1	1	1	1	1	1	1	1	1	1	1		1	1	1	1	1	1	1	1	1	1	1	1	1	1	1
EYA3	1366	AT	18			0	1	0.1269	0.0178	0.0061	0.0477	0.0295	0.0242	0	0.0564	0.0242	0.0181	0.0111	0.0226	0.0123	0.0126	0.028	0.0148	0	0.0454	0.0132	0	0.0532	0.0547	0.0186	0	0.0284	0.011	0.0109	0.0202	0.0239	0	0.0131	0.0083	0.0195	0.0231	0.0147	0.0341	0.0142	0.012	0.0173	0	0.0109	0.0273
EYA3	1367	AT	19			0	1	0.1269	0.0178	0.9939	0.9523	0.9705	0.9758	1	0.9436	0.9758	0.9819	0.9889	0.9774	0.9877	0.9874	0.972	0.9852	1	0.9546	0.9868	1	0.9468	0.9453	0.9814	1	0.9716	0.989	0.9891	0.9798	0.9761	1	0.9869	0.9917	0.9805	0.9769	0.9853	0.9659	0.9858	0.988	0.9827	1	0.9891	0.9727
EYA3	1368	AA	10.1	9	10.2	0	0.94	0.22	0.0147	1	1	1	1	1	1	1	1	1	1	1	1	1	1	1	1	1		1	1	1	1	1	1		1	1	1	1	1	1	1	1	1	1	1	1	1	1	1
EYA3	1369	ES	7	6	8	0	0.9855	0.8824	0.1221	0.4305	0.3972	0.5272	0.2803	0.3885	0.4274	0.4733	0.2874	0.4145	0.3528	0.3225	0.8237	0.4988	0.3185	0.2689	0.3687	0.4274	0.2061	0.4653	0.3274	0.4378	0.609	0.4378	0.2112	0.4488	0.5159	0.4264	0.567	0.5953	0.4725	0.5388	0.4639	0.4238	0.5003	0.4156	0.4684	0.4549	0.4805	0.609	0.4229
EYA3	1370	ES	06:07:00	5	8	0	0.9818	0.0692	0.0063	1	1	1	1	1	1	1	1	1	1	1	1	1	1	1	1	1	1	1	1	1	1	1	1	1	0.9592	1	1	1	1	1	1	1	1	1	1	1	1	1	1
EYA3	1371	ES	6	5	8	0	0.9873	0.0888	0.0051	1	1	1	1	1	1	1	1	1	1	1	1	1	1	1	1	1	1	1	1	1	1	1	1	1	0.969	1	1	1	1	1	1	1	1	1	1	1	1	1	1
EYA3	1372	ES	4	3	5	0	0.9909	0.252	0.0461	0.957	1	0.9629	1	0.9087	0.9453	0.9742	0.9745	1	0.9468	1	0.9453	0.9593	1	0.961	0.869	1	1	1	0.9167	0.9533	0.9738	0.9639	0.9382	1	0.9176	1	0.9184	1	0.9065	0.9539	0.9841	0.9402	1	1	0.9239	1	1	0.9731	0.9752
EYA3	1374	ES	3	2	4	0	0.9691	0.0732	0.0032	1	1	1	1	1	1	1	1	1	1	1	1	1	1	1	1	1	1	1	1	1	1	1	1	1	1	1	1	1	1	1	1	1	1	1	1	1	1	1	1
PTAFR	1375	AP	1			0	0.7855	1	0.2237	0.8612	0.1234		0.4536	0.8172	0.1258	0.7754	0.8962	0.967	0.9152	0.9361	0.7513	0.8487	0.8935	0.9272	0.2125	0.3194	0.903	0.24	0.8558	0.8119	0.9443	0.6601	0.9656	0.9379	0.6241	0.8999	0.519	0.9719	0.9294	0.8119	0.82	0.8119			0.823	0.904	0.951	0.788	0.826
PTAFR	1376	AP	2.1			0	0.7855	1	0.2237	0.1388	0.8766		0.5464	0.1828	0.8742	0.2246	0.1038	0.033	0.0848	0.0639	0.2487	0.1513	0.1065	0.0728	0.7875	0.6806	0.097	0.76	0.1442	0.1881	0.0557	0.3399	0.0344	0.0621	0.3759	0.1001	0.481	0.0281	0.0706	0.1881	0.18	0.1881			0.177	0.096	0.049	0.212	0.174
ATPIF1	1378	AT	3			0	1	0.078	0.0099	0.0232	0.0094	0.0145	0.0086	0.0131	0.0127	0.0044	0.0059	0.0261	0.0149	0.0118	0.0189	0.0091	0.0073	0.0064	0.0348	0.024	0.0172	0.0197	0.0121	0.0147	0.0185	0.0111	0.0222	0.0231	0.0146	0.0224	0.0234	0.0055	0.0317	0.0078	0.0098	0.0129	0.0129	0.0287	0.0161	0.0135	0.0068	0.0241	0.0141
ATPIF1	1379	AT	2.4			0	1	0.078	0.0099	0.9768	0.9906	0.9855	0.9914	0.9869	0.9873	0.9956	0.9941	0.9739	0.9851	0.9882	0.9811	0.9909	0.9927	0.9936	0.9652	0.976	0.9828	0.9803	0.9879	0.9853	0.9815	0.9889	0.9778	0.9769	0.9854	0.9776	0.9766	0.9945	0.9683	0.9922	0.9902	0.9871	0.9871	0.9713	0.9839	0.9865	0.9932	0.9759	0.9859
ATPIF1	1380	RI	2.2	2.1	2.3	0	1	0.5297	0.0972	0.8512	0.9763	0.8196	0.8815	0.8954	0.8189	0.7469	0.8643	0.9825	0.992	0.6747	0.729	1	0.7427	0.8801	0.8829	0.8696	0.9723	1	0.8725	0.9774	1	0.9628	0.9749	0.872	0.8736	0.9047	0.9856	0.5118	0.9317	1	0.8812	0.7008	0.891	1	0.9531	0.975	1	0.789	0.7564
ATPIF1	1381	RI	2.2:2.3	2.1	2.4	0	1	0.579	0.0898	0.2013	0.117	0.1225	0.1103	0.1589	0.1064	0.1189	0.0903	0.1357	0.4543	0.0729	0.0804	0.0746	0.0825	0.0463	0.0637	0.0748	0.1674	0.1599	0.1667	0.1847	0.1913	0.1494	0.1078	0.2707	0.2146	0.1778	0.1535	0.0281	0.2131	0.0465	0.1945	0.0709	0.1697	0.1082	0.2008	0.3961	0.2017	0.1697	0.1214
ATPIF1	1382	AA	2.3	2.1	2.4	0	1	0.1248	0.021	0.0502	0.0044	0.032	0.0189	0.0256	0.0354	0.0549	0.0172	0.0029	0.0071	0.0503	0.0407	0	0.0325	0.009	0.0113	0.0147	0.0057	0	0.032	0.0053	0	0.0086	0.0037	0.0676	0.0435	0.0305	0.0027	0.0407	0.0221	0	0.0325	0.0451	0.0369	0	0.0127	0.0173	0	0.0553	0.0708
MED18	1383	RI	3.2	3.1	3.3	0	1	0.0583	0.0093	0.9863	1	1	0.9712	1	1	1	1	1	0.9851	0.9874	1	1	0.9657	0.9757	1	1	0.9827	1	1	1	1	0.9774	1	0.9713	0.9874	0.9733	0.9867	1	1	1	1	1	1	0.9842	0.9912	1	1	0.9873	1
PHACTR4	1384	AP	1			0	0.9873	0.7558	0.1456	0.6022	0.5324	0.8836	0.5324	0.82	0.5991	0.7891	0.5655	0.7965	0.681	0.7994	0.4697	0.82	0.5501	0.9419	0.7493	0.4748	0.3942	0.7265	0.813	0.6241	0.7179	0.6839	0.6634	0.766	0.5116	0.7042	0.5761	0.5475	0.623	0.7097	0.6921	0.6949	0.6949	0.722	0.6869	0.6219	0.7157	0.4767	0.7192
PHACTR4	1385	AP	3			0	0.9873	0.7558	0.1456	0.3978	0.4676	0.1164	0.4676	0.18	0.4009	0.2109	0.4345	0.2035	0.319	0.2006	0.5303	0.18	0.4499	0.0581	0.2507	0.5252	0.6058	0.2735	0.187	0.3759	0.2821	0.3161	0.3366	0.234	0.4884	0.2958	0.4239	0.4525	0.377	0.2903	0.3079	0.3051	0.3051	0.278	0.3131	0.3781	0.2843	0.5233	0.2808
RCC1	1386	AP	1			0	1	0.6799	0.143	0.3814	0.784	0.6413	0.9032	0.6479	0.8514	0.4349	0.6509	0.6718	0.7436	0.6218	0.8015	0.6347	0.5112	0.5833	0.8694	0.8537	0.7384	0.5655	0.6732	0.7568	0.6327	0.6142	0.7738	0.7141	0.6786	0.8567	0.619	0.4946	0.7152	0.5833	0.6424	0.8381	0.7283	0.5571	0.5739	0.6988	0.594	0.4902	0.6248
RCC1	1387	AP	5			0	1	0.6799	0.143	0.6186	0.216	0.3587	0.0968	0.3521	0.1486	0.5651	0.3491	0.3282	0.2564	0.3782	0.1985	0.3653	0.4888	0.4167	0.1306	0.1463	0.2616	0.4345	0.3268	0.2432	0.3673	0.3858	0.2262	0.2859	0.3214	0.1433	0.381	0.5054	0.2848	0.4167	0.3576	0.1619	0.2717	0.4429	0.4261	0.3012	0.406	0.5098	0.3752
RCC1	1388	ES	7	6	8	0	1	0.7166	0.1034	0.2697	0.3572	0.2107	0.6299	0.2483	0.2957	0.1836	0.1297	0.2018	0.2929	0.28	0.4142	0.3606	0.18	0.3553	0.3559	0.3744	0.7509	0.2174	0.181	0.4546	0.2406	0.1593	0.2475	0.141	0.1569	0.4343	0.2478	0.141	0.2358	0.1187	0.2828	0.493	0.1211	0.4217	0.1946	0.1346	0.0852	0.3165	0.1177
TAF12	1389	AD	1.2	1.1	2	0	1	0.3425	0.058	0.0978	0.0231	0.0998	0.0938	0.0663	0.0565	0.1303	0.1928	0.1563	0.2095	0.0572	0.055	0.137	0.0589	0.0615	0.0564	0.0659	0.0383	0.0781	0.0528	0.0407	0.2	0.0357	0.0646	0.1123	0.0384	0.057	0.1576	0.1032	0.0917	0.0761	0.178	0.0354	0.102	0.0576	0.0723	0.0743	0.1633	0.1399	0.1114
GMEB1	1390	AA	3.1	2.2	3.2	0	0.8909	0.754	0.1315	0.3091	0.6151	0.4518	0.4825	0.39	0.5986	0.544	0.2422	0.1991	0.4986	0.3789	0.3091		0.544	0.3737	0.3476	0.6722	0.5986	0.2892	0.2422	0.5158	0.3587	0.5986	0.3737	0.3949	0.39	0.4272	0.2988	0.4272	0.3179	0.2716	0.3833	0.3321		0.2716	0.2325	0.2929	0.2561	0.2371	0.5108
GMEB1	1391	AA	2.1	1	2.2	0	0.7891	0.6328	0.1149	0.9427	0.7437	0.7267	0.9207	0.9141			0.7154	0.853	0.8286	0.8073			1		0.9355	0.7206	1	0.5919		0.7946	0.7946	0.4916	0.8855		0.8417	0.7946	0.5473			0.7719	0.6394			0.8915	1	0.78	0.9063	1	0.9063
YTHDF2	1394	ES	2	1.3	3	0	1	0.0503	0.0091	0.9941	0.9894	1	0.962	0.9865	1	1	1	1	1	1	1	1	0.9901	1	1	1	0.9898	0.982	0.9865	0.9878	0.9889	0.9862	0.9518	0.9879	0.9898	0.9862	1	1	0.9794	0.9934	0.992	1	0.9836	0.992	1	1	1	0.9891	0.9887
YTHDF2	1395	RI	1.2	1.1	1.3	0	0.9764	0.0865	0.0085	1	1	1	1	1	1	1	1	1	1	1	1	1	1	1	1	1	1	1	1	1	0.9766	1	1	1	1	1	1	1	1	1	1	1	1	1	1	1	1	1	1
EPB41	1396	AP	2			0	0.8618	0.5078	0.048	0	0	0.0442	0	0	0	0	0.0623	0.0526	0	0.0483	0	0	0	0	0.0371	0.0509	0	0	0	0.1122	0.0397	0.063	0	0.1813	0	0	0	0.0555	0	0.0682	0.0296	0		0	0	0	0	0.0772	0
EPB41	1397	AP	3			0	0.8618	0.753	0.1385	0.3471	0.1178	0.386	0.0273	0.1894	0.0881	0.1491	0.1877	0.1109	0.0339	0.2038	0.1491	0.1491	0.0655	0.0356	0.1341	0.0307	0.0552	0.2595	0	0.0676	0.0718	0.3415	0.1229	0.2731	0.1491	0	0.3687	0.1337	0	0.0137	0.0535	0.3026		0.1447	0.3933	0.1374	0.1709	0.093	0.1737
EPB41	1398	AP	1			0	0.8618	0.753	0.14	0.6529	0.8822	0.5698	0.9727	0.8106	0.9119	0.8509	0.75	0.8365	0.9661	0.7478	0.8509	0.8509	0.9345	0.9644	0.8289	0.9185	0.9448	0.7405	1	0.8201	0.8884	0.5955	0.8771	0.5456	0.8509	1	0.6313	0.8108	1	0.9181	0.9168	0.6974		0.8553	0.6067	0.8626	0.8291	0.8297	0.8263
EPB41	1399	AT	19.2			0	1	0.0615	0.0096	0.0066	0.0167	0.0094	0.0231	0	0	0	0.0266	0	0.0113	0.0124	0.0302	0	0	0	0.016	0	0	0	0.0376	0	0.008	0.0061	0.0135	0.0062	0	0.0077	0.0328	0.0166	0	0	0	0.0087	0	0.0072	0.0233	0	0	0.0186	0.0072
EPB41	1400	AT	24			0	1	0.0615	0.0096	0.9934	0.9833	0.9906	0.9769	1	1	1	0.9734	1	0.9887	0.9876	0.9698	1	1	1	0.984	1	1	1	0.9624	1	0.992	0.9939	0.9865	0.9938	1	0.9923	0.9672	0.9834	1	1	1	0.9913	1	0.9928	0.9767	1	1	0.9814	0.9928
EPB41	1401	ES	21	20	22	0	0.9982	0.1855	0.0217	0.9807	1	0.9865	0.9759	1	0.976	0.9403	1	0.9732	1	0.9769	0.9818	0.9692	0.9713	0.9486	1	0.974	1	0.9635	0.9669	0.9654	0.9883	1	0.9743	0.9455	0.9896	0.9502	0.9701	0.9849	0.9743	0.9713	0.9533	0.9775	1	0.9768	0.9774	0.9662	0.9852	0.9656	0.9839
EPB41	1403	ES	20	19.1	21	0	0.9982	0.1978	0.0325	0.974	0.983	0.9749	1	0.9623	0.9643	1	0.9655	0.9706	0.9785	0.9607	0.9351	1	1	0.8627	1	1	0.9516	0.9851	1	0.9617	1	0.9684	1	0.9379	0.9609	0.9585	0.8533	1	0.9846	0.9491	0.9467	0.9764	0.9426	0.9625	0.9449	0.9167	0.9809	0.9423	1
EPB41	1409	ES	16	15	18	0	0.8145	1	0.164	0.2487		0.2059				0.4095	0.2082	0.3094	0.4783	0	0.3777	0.0798	0.1082		0.1708	0.2198	0	0.2587	0.7275	0.1082	0.2269	0.1221	0.4095	0.1733	0.0942		0.642	0.1792	0.3479	0.2288	0.352		0.3268	0.0974	0.1285	0.1953	0.4057	0.1428	0.3336
EPB41	1411	ES	16:18:00	15	19.1	0	0.88	1	0.2751	0.6831	0	0.7107	0	0	0	0.7157	0.4863	0.4716	0.3624	0	0.1577	0.0762			0.0514	0.0984		0.2262	0.8811	0.0638	0.4341	0.1303	0.8283	0.6323	0.1076	0.1922	0.6459	0.8733	0.6608	0.2537	0.4457	0	0.36	0.2594	0.5902	0.4927	0.7586	0.137	0.5635
EPB41	1412	ES	18	15	19.1	0	0.9382	1	0.2355	0.8692	0.274	0.9057	0.2654	0.3533	0.2256	0.7997	0.7823	0.6576	0.3728	0.2692	0.2502	0.4932	0.7658	0.6532	0.2194	0.2767	0.7093	0.4609		0.3639	0.7329	0.5336	0.8772	0.9026	0.5433	0.4291	0.519	0.972	0.7839	0.5315	0.5935	0.19	0.5585	0.7694	0.9098	0.8087	0.8224	0.4936	0.7283
EPB41	1414	ES	7	6	8	0	0.9836	0.3049	0.0348	1	1	0.976	1	1	1	1	0.9319	0.9629	1	0.9333	0.9525	1	1	0.9504	0.9727	1	0.9492	0.9801	0.9617	1	1	0.9688	0.9359	1	0.9377	0.9692	0.9647	0.9751	0.9554	0.9636	0.9793	1	1	0.9777	0.9767	0.9261	0.9623	1	0.9426
EPB41	1415	ES	5	4.2	6	0	0.8255	0.1158	0.013	0	0	0	0	0	0		0	0	0	0	0				0	0		0.0197	0	0	0.055	0	0.0418	0	0	0.0337	0	0	0	0	0.0197	0		0	0.0104	0	0	0	0
SRSF4	1421	ES	9	8	10	1	0.7891	0.0646	0.0123	0.9662	0.9673	0.963	0.9774	0.9713	0.9344		0.9723	0.9722	0.9733	0.9607	0.935	0.9551	0.9488	0.9775			0.9572		0.9711	0.9614	0.9745	0.9409	0.973		0.96	0.9728	0.9597	0.9714	0.9695		0.9776	0.9556	0.9468	0.9727	0.9699	0.9726	0.9793	0.9504	0.9707
SRSF4	1422	ES	08:09:00	7	10	0	1	0.011	0.0011	1	1	1	1	1	1	1	1	1	1	1	1	0.9943	1	1	0.9971	1	1	1	1	1	1	1	0.9959	1	1	1	1	1	1	1	1	1	0.992	1	1	1	1	1	1
SRSF4	1424	ES	6	5	7	0	1	0.4538	0.0611	0.1261	0.071	0.0717	0.0661	0.0541	0.1141	0.0417	0.0421	0.0531	0.0349	0.0732	0.0659	0.1204	0.0651	0.0295	0.1085	0.1142	0.2403	0.0638	0.1728	0.1258	0.0823	0.1644	0.1233	0.0447	0.0471	0.0916	0.1352	0.0592	0.1417	0.1222	0.1161	0.0871	0.0706	0.1419	0.0832	0.052	0.0342	0.1179	0.1012
SRSF4	1425	ES	02:03:04	1	5	0	1	0.7343	0.1159	0.298	0.3898	0.2791	0.3155	0.2871	0.4966	0.1875	0.2001	0.25	0.235	0.2285	0.2532	0.2477	0.2117	0.1296	0.2743	0.2688	0.5943	0.3924	0.4497	0.2582	0.3563	0.3867	0.1916	0.1985	0.3763	0.2813	0.3862	0.1222	0.2942	0.3208	0.3182	0.3928	0.2756	0.5917	0.2359	0.1627	0.2628	0.3135	0.3345
MECR	1426	AA	2.1	1	2.2	0	1	0.539	0.091	0.366	0.3617	0.4011	0.2543	0.2563	0.3582	0.1508	0.4423	0.3031	0.1825	0.1995	0.4763	0.2012	0.2365	0.2543	0.3172	0.2294	0.389	0.2904	0.3481	0.5019	0.3932	0.4615	0.2986	0.3421	0.3847	0.4501	0.3804	0.3195	0.3531	0.35	0.229	0.1952	0.1896	0.5295	0.3673	0.3087	0.2415	0.2769	0.4857
PTPRU	1427	AA	31.1	30	31.2	0	0.9564	0.1178	0.0135	1	0.9752	0.9852	0.9908	1	0.9906		1	1	1	1	0.9889	0.9574		0.9954	0.9856	0.9897	0.9919	1	1	0.989	1	0.9645	1	1	1	1	1	0.9926	1	1	1	1		1	0.9922	1	1	1	1
PTPRU	1428	AD	23.2	23.1	24	0	0.9109	1	0.1044	0.6135	0.7199	0.4757	0.6634	0.6173	0.6792		0.6086	0.6878	0.5595	0.5474	0.7362	0.6202		0.5928	0.7257	0.682	0.6558	0.7496	0.6363	0.6161	0.54	0.784	0.784	0.5645	0.4757	0.6553	0.7313	0.5803	0.7438	0.6066	0.6202	0.6135		0.5958	0.6122	0.5595		0.6097	0.6019
PTPRU	1430	ES	21	19	22	0	0.8418	0.0524	0.0042	0	0	0.0076	0.0139	0	0		0		0		0	0		0	0	0	0	0	0	0	0	0	0	0	0	0	0	0	0	0	0	0		0	0		0	0
PTPRU	1431	ES	20	19	22	0	0.8418	0.0767	0.004	0	0	0	0	0	0		0		0		0	0		0	0	0	0	0	0	0	0	0	0	0	0	0	0	0	0	0	0	0		0	0		0	0
PTPRU	1432	ES	15	14	16	0	0.8455	0.1706	0.0136	0	0	0.0089	0	0	0		0	0			0	0		0	0	0	0.0119	0.0251	0	0	0	0	0	0	0	0	0	0	0	0.0378	0	0		0	0	0		0
SDC3	1436	RI	2.2	2.1	2.3	0	0.9873	0.5272	0.0823	0.0573	0.1146	0.0629	0.041	0.0945	0.0742	0.1173	0.1949	0.1333	0.0627	0.0509	0.0512	0.0616	0.0739	0.0477	0.0539	0.0913	0.0767	0.0446	0.0679	0.0896	0.089	0.1684	0.1246	0.2085	0.153	0.0851	0.1231	0.0773	0.1083	0.0726	0.0666	0.0856	0.1459	0.1047	0.0602	0.0801	0.0428	0.0632	0.1023
PUM1	1443	AD	18.2	18.1	19	0	0.9964	0.4667	0.0675	0.566	0.5085	0.554	0.6199	0.5841	0.6025	0.4914	0.4713	0.6043	0.4993	0.4835	0.4299	0.4306	0.5193	0.503	0.4503	0.5755	0.4835	0.5727	0.4533	0.4671	0.5073	0.5592	0.4558	0.3979	0.5144	0.5406	0.4598	0.4474	0.596	0.576	0.4835	0.6781	0.4598	0.5631	0.4002	0.4257	0.526	0.479	0.5867
PUM1	1444	ES	15	14.2	16	1	0.7964	0.1576	0.0261	0.9425	0.8848	0.862	0.8835	0.9442	0.9271	0.8666	0.9398	0.9568	0.9512	0.9296	0.9261	0.9537	0.9357		0.9611	0.9426	0.9316		0.9612	0.9287	0.8663	0.945	0.9408	0.9363	0.9345	0.9485	0.946		0.9291	0.9482	0.9555			0.9231	0.9415	0.889	0.9518		0.9597
PUM1	1445	AA	14.1	13	14.2	0	0.9982	0.4037	0.0561	0.8608	0.7702	0.7509	0.8293	0.8482	0.8963	0.8175	0.8225	0.8331	0.8064	0.7734	0.771	0.8108	0.864	0.8941	0.8215	0.9389	0.8017	0.7465	0.8471	0.7529	0.8628	0.7914	0.8977	0.8569	0.8077	0.7573	0.8998	0.8021	0.7476	0.9226	0.8284	0.8274	0.9096	0.8313	0.9061	0.8562	0.8307	0.848	0.8719
PUM1	1446	ES	13	12	14.1	0	1	0.0428	0.0068	1	1	1	1	1	1	1	1	1	1	1	1	1	1	1	0.9868	1	1	1	1	1	1	1	1	1	0.9924	0.9648	1	1	1	1	1	0.9572	1	1	1	1	1	0.9927	0.982
PUM1	1447	AA	10.1	9	10.2	0	0.9673	0.7248	0.0998	0.4522	0.5154	0.3721	0.4085	0.4916	0.392	0.5919	0.4699	0.4161	0.3559	0.6091	0.4532	0.2117	0.3792	0.4916	0.2388	0.5371	0.3006	0.3066	0.5134	0.386	0.5144	0.6311	0.2985	0.6171	0.4507	0.3142	0.3006	0.4362	0.5101	0.4119	0.5656	0.4532	0.4916	0.4991	0.4691	0.4488	0.5473	0.4507	0.3589
PUM1	1448	ES	06:07:08	5	9	0	1	0.0448	0.0042	1	1	1	1	1	1	1	1	0.9938	1	1	0.9883	1	1	1	1	1	1	1	1	1	1	1	1	1	0.9955	1	1	1	1	1	1	1	1	0.991	1	1	1	1	1
PUM1	1449	ES	5:6:7:8	4	9	0	1	0.1336	0.0186	0.9759	0.9568	0.9764	0.9833	0.976	0.9877	0.9589	0.9776	0.9815	1	0.9852	1	1	0.9774	1	0.9909	0.9894	0.9554	0.9798	0.923	0.9451	1	0.9777	0.9753	0.9906	0.9867	0.9839	1	0.9786	1	0.9809	0.9729	0.9843	0.9263	0.9868	0.9529	0.9916	1	0.9772	0.9592
PUM1	1450	ES	07:08:00	4	9	0	0.8691	0.785	0.1799	0.6844	0.5502	0.7912	0.5402	0.7602	0.8999	0.3943	0.8468	0.7013		0.8118	1		0.7308	1	0.8758	0.8856	0.6646	0.5572	0.4507	0.6991	1	0.4016	0.7493	0.8036	0.8214	0.8764	1	0.7618	1	0.7609	0.5923	0.733	0.5423	0.8155	0.6169	0.9011	1	0.7214	0.4468
PUM1	1452	ES	05:06:00	4	7	0	1	0.2435	0.0296	0.956	0.9588	0.925	0.9821	0.9353	0.9052	0.9761	0.899	0.9642	1	0.9453	0.9633	1	0.9491	0.9783	0.9439	0.9274	0.9288	0.9774	0.9401	0.8989	0.9893	0.9872	0.9413	0.9676	0.9457	0.9035	0.9219	0.9382	0.9361	0.9469	0.9649	0.9639	0.9106	0.9474	0.9343	0.9383	0.9688	0.9495	0.9699
PUM1	1453	ES	3	2.2	4	0	0.9818	0.2565	0.0323	0.0127	0.0146	0.0734	0.044	0.0179	0.0834	0	0.064	0.0087	0.0496	0	0.0304	0.0341	0	0.023	0.015	0.0426	0.0143	0.0293	0.0274	0.0129	0.0168	0.0387	0	0.0518	0	0.0179	0.0502	0.0321	0	0.0387	0.0614	0.051	0.059	0.0355	0.025	0.044	0.0262	0.0215	0.0321
PUM1	1455	AD	2.2	2.1	4	0	0.9982	0.07	0.0099	0.9935	0.985	1	1	1	1	0.9767	0.984	0.9829	1	1	1	1	0.9847	1	1	1	0.9893	1	0.9689	1	1	0.9848	1	0.9711	1	0.9798	1	1	1	1	1	1	1	0.9943	0.9961	1	1	1	1
PUM1	1456	AD	1.2	1.1	2.1	0	0.9945	0.264	0.0225	0.9721	0.9815	1	1	1	0.9776	1	1	0.9549	0.9851	0.9724	0.9568	0.9684	1	0.9212	0.985	0.9779	0.9864	1	0.9774	1	1	0.9776	0.9749	0.9771	0.99	1	1	0.9529	0.9583	0.9921	0.9627	0.9496	1	1	0.988	1	1	0.9795	1
SNRNP40	1457	AP	7.1			0	1	0.1238	0.0178	0.0195	0.0243	0.0285	0.0631	0.0048	0.0463	0.0277	0	0.0129	0.0164	0.0151	0.0175	0.0227	0.0159	0.0039	0.0177	0.0201	0.0127	0.0611	0.0375	0.0404	0.0222	0.047	0.0216	0.0129	0.042	0.0322	0.0353	0.0029	0.055	0.0245	0.0078	0.0051	0.0129	0.0609	0.0093	0.0102	0.0055	0.0299	0.0283
SNRNP40	1458	AP	1			0	1	0.1238	0.0178	0.9805	0.9757	0.9715	0.9369	0.9952	0.9537	0.9723	1	0.9871	0.9836	0.9849	0.9825	0.9773	0.9841	0.9961	0.9823	0.9799	0.9873	0.9389	0.9625	0.9596	0.9778	0.953	0.9784	0.9871	0.958	0.9678	0.9647	0.9971	0.945	0.9755	0.9922	0.9949	0.9871	0.9391	0.9907	0.9898	0.9945	0.9701	0.9717
SNRNP40	1459	ES	10	9	11	0	1	0.2816	0.0405	0.132	0.2278	0.1765	0.1923	0.1209	0.153	0.1467	0.1761	0.121	0.1384	0.1667	0.1934	0.1472	0.1455	0.0993	0.1499	0.1368	0.1762	0.1769	0.238	0.1591	0.1579	0.1765	0.1486	0.141	0.1627	0.1314	0.2035	0.1142	0.125	0.155	0.1834	0.151	0.0861	0.2074	0.1085	0.1086	0.1801	0.199	0.1306
ZCCHC17	1460	AD	7.2	7.1	8	0	1	0.175	0.01	0.019	0	0.021	0.0085	0.0254	0	0	0.0095	0.0065	0.0094	0.0069	0.0158	0	0	0	0	0	0.0092	0	0	0	0	0.0057	0.0114	0.02	0	0	0	0	0.0095	0	0.0088	0.0109	0	0	0.0048	0.0089	0.02	0.0149	0.0064
ZCCHC17	1461	ES	3	2	4	0	1	0.3668	0.0571	0.0626	0.3277	0.1171	0.1648	0.1474	0.313	0.1222	0.112	0.1474	0.071	0.0849	0.2708	0.0691	0.115	0.1222	0.1493	0.1002	0.1222	0.2485	0.1799	0.1659	0.1023	0.1459	0.0554	0.1441	0.1315	0.1643	0.1643	0.1222	0.1153	0.0816	0.0955	0.1293	0.1304	0.1029	0.0563	0.0444	0.1413	0.084	0.0684
ZCCHC17	1463	ES	02:03:00	1.1	4	0	0.9491	0.7851	0.1526	0.4128	0.8572	0.6404	0.6186	0.8556	0.9209	0.833	0.5944	0.5809	0.4395	0.6492	0.8595	1	0.643	0.892	0.861	0.8637	0.8711	0.8228	1	0.8239	0.5584	0.9284		0.8965	0.8656	1	0.8738	0.8329	0.6018	0.7243	0.7359	0.8983	0.8694	0.7067	0.5715	0.3905	1	0.7489	0.7605
ZCCHC17	1464	ES	1.2:2	1.1	4	0	0.9327	0.945	0.1677	0.576		0.5517	0.5207	0.7725	0.794	0.699	0.435	0.3971	0.6781	0.3729	0.652	1	0.7199		0.7767	0.8237			1	0.7925	0.6706	0.9455	0.719	0.6901	0.7331	1	0.7593	0.8038	0.5829	0.7507	0.719	0.651	0.8729	0.8653	0.7545	0.4258	1	0.862	0.7153
ZCCHC17	1465	ES	2	1.1	4	0	1	0.1569	0.0232	0.9477	0.9467	0.9494	0.9224	0.9774	0.9728	0.974	0.9367	0.8927	0.9373	0.957	0.9472	1	0.9438	0.9863	0.9798	0.9856	0.9824	0.9448	1	0.9778	0.9465	0.9894	0.9631	0.9809	0.9849	1	0.9779	0.9787	0.9403	0.9764	0.9763	0.9843	0.9851	0.9729	0.9593	0.933	1	0.9786	0.9835
ZCCHC17	1466	AD	1.2	1.1	2	0	1	0.3004	0.0427	0.0817	0.0404	0.064	0.096	0.0817	0.1063	0.0684	0.0543	0.0828	0.1504	0.0292	0.1149	0.0906	0.1366	0.0092	0.0808	0.0817	0.0291	0.016	0.0598	0.0865	0.1102	0.1814	0.1149	0.0545	0.0485	0.1456	0.0785	0.0965	0.1028	0.0821	0.0666	0.035	0.1102	0.1712	0.1351	0.0609	0.1714	0.1315	0.0504
FABP3	1467	ES	3	2	4	0	0.9491	0.5609	0.0478		0.0048	0	0.0283	0.011	0.0323	0	0.0343		0.0644	0.0228	0.0152	0.0381	0	0.0626	0.0211	0.018	0.047	0	0.0461	0.0199		0.0097	0.102	0.029	0.0719	0.0178	0.0122	0	0.0491	0.0192	0.0338	0.0108	0.0218	0.0609	0.1957	0	0.0573	0.0626	0.0328
SERINC2	1468	AP	1			0	0.9945	0.1492	0.0072	0	0	0	0	0	0	0	0	0	0.0054	0	0	0	0	0	0	0	0	0	0	0	0	0	0	0	0.0018	0	0	0	0	0	0	0	0	0	0	0.0011	0.0033	0.0013	0
SERINC2	1469	AP	3			0	0.9945	0.3208	0.0412	0.9501	0.9557	0.9297	1	0.9592	0.9545	0.9581	0.9321	0.8709	0.9674	0.9299	0.9908	0.975	0.9485	0.9757	0.9739	0.9404	0.9519	0.9932	0.944	0.905	0.925	0.9611	0.9235	0.9483	0.8108	0.9726	0.9137	0.953	0.8665	0.9556	0.9755	0.9706	1	0.8931	0.9459	0.8789	0.9742	0.9294	0.9664
SERINC2	1470	AP	2.1			0	0.9945	0.0537	0.0048	0	0	0	0	0	0	0	0	0	0	0	0	0	0	0	0	0	0	0	0	0	0	0.0281	0	0.0044	0	0	0	0	0	0	0	0	0	0.019	0	0	0	0	0
SERINC2	1471	AP	4			0	0.9945	0.3208	0.0406	0.0499	0.0443	0.0703	0	0.0408	0.0455	0.0419	0.0679	0.1291	0.0272	0.0701	0.0092	0.025	0.0515	0.0243	0.0261	0.0596	0.0481	0.0068	0.056	0.095	0.075	0.0108	0.0765	0.0473	0.1874	0.0274	0.0863	0.047	0.1335	0.0444	0.0245	0.0294	0	0.0879	0.0541	0.1201	0.0224	0.0693	0.0336
TINAGL1	1473	AT	4			0	1	0.0688	0.0088	0.0164	0.0152	0.0184	0.0223	0.0065	0.0175	0.0017	0.0023	0.0214	0.0124	0.0068	0.0209	0.0105	0.0101	0.0082	0.0191	0.0229	0.0213	0.0052	0.0088	0.0074	0.0064	0.0211	0.0105	0.0041	0.0061	0.0058	0.016	0.0112	0.016	0.0071	0.0322	0.014	0.0038	0.0259	0.0094	0.01	0.0046	0.0201	0.0067
TINAGL1	1474	AT	12			0	1	0.0688	0.0088	0.9836	0.9848	0.9816	0.9777	0.9935	0.9825	0.9983	0.9977	0.9786	0.9876	0.9932	0.9791	0.9895	0.9899	0.9918	0.9809	0.9771	0.9787	0.9948	0.9912	0.9926	0.9936	0.9789	0.9895	0.9959	0.9939	0.9941	0.984	0.9888	0.984	0.9929	0.9678	0.986	0.9962	0.9741	0.9906	0.99	0.9954	0.9799	0.9933
TINAGL1	1476	RI	5.2	5.1	5.3	0	0.9945	0.4151	0.0447	0.0634	0.0755	0.0572	0.1036	0.046	0.0534	0.0293	0.0755	0.079	0.0233	0.0268	0.0812	0.0737	0.0452	0.0268	0.0861	0.0733	0.0905	0.0254	0.0304	0.0603	0.032	0.0948	0.0825	0.0376	0.0581	0.0447	0.0564	0.0776	0.0512	0.0122	0.0584	0.064	0.0266	0.1014	0.0757	0.1047	0.0491	0.0602	0.0785
TINAGL1	1477	AA	5.1:5.2	3	5.3	0	0.8255	0.3937	0.0388	1	1	1	1	0.9706	1		1	1	1	0.9804	1	1	1	0.9718	1	1	1		1	1	1	0.7259	1		1	1		0.9465	1	0.9103	1	1		0.9868	1	1	1	0.9654	1
TINAGL1	1478	ES	5.1	3	5.3	0	1	0.0836	0.0046	1	1	1	1	0.9989	1	1	1	1	1	0.9997	1	1	1	0.9994	1	1	1	1	1	1	1	0.9714	1	1	1	1	1	0.9963	1	0.9991	1	1	1	0.9989	1	1	1	0.9984	1
TINAGL1	1479	ES	3	2	5.1	0	1	0.0728	0.0066	1	1	1	0.9967	0.9989	0.9947	1	1	0.9739	0.9938	0.9982	0.9935	1	0.994	0.9971	0.9864	0.9953	0.9742	1	1	1	0.9967	1	1	0.9498	1	0.998	1	1	1	0.9991	0.9931	0.9882	1	0.9979	0.9983	0.9895	0.9953	0.9922	1
PEF1	1487	AT	3			0	1	0.0285	0.0049	0.0095	0.0048	0.0088	0.0113	0.008	0.0105	0.0044	0.0017	0.0041	0.0096	0.0061	0.0061	0.0102	0.0064	0.0083	0.0095	0.0131	0.0211	0.012	0.0134	0.0118	0.008	0.0111	0.0076	0.0126	0.0242	0.0156	0.0164	0.0006	0.0105	0.0091	0.0074	0.0105	0.0039	0.0209	0.0035	0.0053	0.0065	0.0103	0.0083
PEF1	1488	AT	6			0	1	0.0285	0.0049	0.9905	0.9952	0.9912	0.9887	0.992	0.9895	0.9956	0.9983	0.9959	0.9904	0.9939	0.9939	0.9898	0.9936	0.9917	0.9905	0.9869	0.9789	0.988	0.9866	0.9882	0.992	0.9889	0.9924	0.9874	0.9758	0.9844	0.9836	0.9994	0.9895	0.9909	0.9926	0.9895	0.9961	0.9791	0.9965	0.9947	0.9935	0.9897	0.9917
COL16A1	1490	AT	45.2			0	1	0.0621	0.0087	0.0098	0	0.0063	0.0075	0.0013	0.0096	0	0.0036	0.0033	0.0129	0.0045	0	0.0011	0	0.0016	0	0.0049	0.002	0	0.005	0.0093	0	0.0155	0.0022	0	0	0.0007	0.0021	0.0115	0.0108	0.0095	0.0028	0.0051	0.003	0.0029	0.0031	0.0057	0	0	0.0027
COL16A1	1491	AT	75			0	1	0.0621	0.0087	0.9902	1	0.9937	0.9925	0.9987	0.9904	1	0.9964	0.9967	0.9871	0.9955	1	0.9989	1	0.9984	1	0.9951	0.998	1	0.995	0.9907	1	0.9845	0.9978	1	1	0.9993	0.9979	0.9885	0.9892	0.9905	0.9972	0.9949	0.997	0.9971	0.9969	0.9943	1	1	0.9973
COL16A1	1492	ME	47|48	46	49	0	0.9691	0.0752	0.0059	1	1	1	1	1	1	1	1	1	1	0.9975	1	1	1	0.9967	1	1	1	1	1	1	1	1	1		1	0.9963	0.9882	1	0.9945	1	1	1	1	1	0.9989	1	1	1	1
COL16A1	1493	ES	44	43	45.1	0	0.9691	1	0.2238	0.1714	0.1837	0.5476	0.107	0.7033	0.2699	0.6832	0.835	0.4045	0.6821	0.4667	0.1199	0.7227	0.8191	0.3008	0.1832	0.3069	0.2917	0.7699	0.5063	0.429	0.7901	0.538	0.5298		0.5557	0.5574	0.7242	0.5983	0.1928	0.7714	0.2327	0.3014	0.2124	0.3003	0.5109	0.6222	0.6304	0.8072	0.4848
BAI2	1499	ES	33	32.2	34	0	0.8673	0.5744	0.1069	0.6181	1	0.951		0.9524			0.8821	0.8778	1	0.889	1	0.8138		1	0.8148	0.901	0.9704	0.7747	0.8827	0.925	1	0.9331	1		0.8585	0.9595	0.9562	0.8697	0.8544	0.9763	0.9189	1	0.8292	0.9171	0.8976	0.8072	0.8644	0.8835	0.6455
PTP4A2	1518	ES	7	6	8	0	1	0.0763	0.0082	0.9843	0.9846	0.9826	0.9924	0.9896	0.9838	0.9881	0.9888	0.9749	0.9845	0.9902	0.9943	0.9866	0.9808	0.9898	0.9835	0.9824	0.9927	0.979	0.9878	0.9896	0.9873	0.9872	0.9774	0.975	0.9746	0.994	0.975	0.9805	0.9911	0.985	0.9646	0.9837	0.9638	0.9759	0.9707	0.9809	0.9707	0.9834	0.9789
PTP4A2	1523	ES	06:07:00	3	8	0	1	0.0274	0.0043	0.9915	0.9986	0.998	0.9957	0.9924	1	0.9928	0.9951	0.9961	0.9954	0.9953	0.9904	0.9978	0.9935	0.9869	0.994	0.9906	0.9969	0.996	0.9874	0.993	0.9916	0.9934	0.995	0.9917	1	0.9946	0.994	0.9966	0.9941	0.9958	0.9954	0.9865	0.9961	0.9942	0.9936	0.9935	0.9902	0.9981	0.9928
PTP4A2	1527	ES	6	3	8	0	0.9782	0.6713	0.1094	0.7414	0.9422	0.9292	0.7219	0.6865	1	0.7249	0.7699	0.915	0.8457	0.767	0.4969	0.9038	0.8338	0.5363	0.8126	0.7584	0.7836	0.8969	0.5957	0.7082	0.6968	0.7584	0.8828	0.8171	1	0.6393	0.8707	0.9042	0.7063	0.8473	0.9255	0.6407	0.9333	0.8802	0.8796	0.8213	0.8246	0.9341	0.8138
PTP4A2	1530	ES	6	3	7	0	1	0.0119	0.0018	1	0.9881	1	0.9977	0.9984	0.9951	1	1	1	0.9976	1	1	1	1	1	0.9936	0.9975	1	0.9957	1	0.9982	1	0.9946	1	1	1	0.9971	1	0.9987	0.9979	1	0.9975	0.996	1	1	0.999	1	1	0.998	0.9961
PTP4A2	1531	ES	04:05:00	3	6	0	1	0.0074	0.001	0.0006	0	0	0	0.0029	0.0014	0.0013	0	0	0.0015	0.0007	0	0.0014	0.0018	0	0.0004	0	0.0039	0	0	0.002	0.0014	0.0011	0.0008	0.0017	0.0024	0.0027	0	0.0007	0	0	0.0034	0	0	0	0.0005	0	0	0	0.0025
PTP4A2	1532	ES	5	3	6	0	1	0.015	0.0018	0.0009	0.0065	0.0017	0.0076	0	0.002	0	0	0	0	0	0	0.0021	0	0.0083	0.0006	0	0.0028	0	0	0	0	0	0.0012	0	0.0037	0.0051	0.0056	0.0011	0	0	0.0027	0	0	0	0.0015	0	0.0106	0	0
PTP4A2	1535	ES	03:04:05	2	6	0	0.9855	0.0821	0.0107	0.0097	0	0	0	0.0205	0.0235	0.0205	0	0	0.0119	0.0094	0	0.0154	0.0171	0	0.0082	0	0.0821	0	0	0.0198	0.0192	0.0124	0.0086	0.0147	0.0324	0.0325	0	0.0076	0	0	0.0167	0	0	0	0.0049	0	0	0	0.0186
PTP4A2	1536	ES	03:05:00	2	6	0	0.9873	0.2878	0.036	0.0121	0.2574	0.0665	0.2012	0	0.0293	0	0	0	0	0	0	0.0193	0	0.1445	0.0102	0	0.1337	0	0	0	0	0	0.0108	0	0.0963	0.1164	0.0536	0.0095	0	0	0.0279	0	0	0	0.0293	0	0.1355	0	0
PTP4A2	1537	ES	3	2	6	0	1	0.5439	0.0276	0.9659	0.9806	0.9717	0.9751	0.9269	0.9672	0.9611	0.9403	0.957	0.9371	0.958	0.9722	0.9524	0.9417	0.9586	0.9702	0.9612	0.9784	0.936	0.9657	0.9455	0.9599	0.9551	0.9485	0.9368	0.9636	0.955	0.9219	0.9469	0.922	0.9454	0.9102	0.9607	0.9466	0.9381	0.9437	0.9155	0.9327	0.9515	0.9284
KHDRBS1	1542	ES	3	2	4	0	1	0.0776	0.013	0.9907	0.9472	0.9699	0.9759	0.957	0.9641	0.9662	0.9744	0.9643	0.9756	0.9664	0.966	0.975	0.9685	0.9642	0.958	0.9724	0.9804	0.9855	0.9826	0.978	0.962	0.938	0.9611	0.9876	0.9825	0.974	0.9812	0.9645	0.9614	0.9695	0.963	0.9769	0.9482	0.982	0.9767	0.9797	0.9798	0.9759	0.9735
TMEM39B	1543	AT	9.2			0	1	0.2672	0.0392	0.1403	0.2723	0.1306	0.2197	0.0915	0.1962	0.0977	0.1381	0.1279	0.0995	0.1258	0.1518	0.1124	0.1442	0.1127	0.1501	0.1548	0.1697	0.1847	0.1887	0.173	0.1196	0.15	0.1233	0.1366	0.2156	0.1541	0.1556	0.0745	0.1676	0.1576	0.1565	0.1532	0.0862	0.1959	0.1252	0.1436	0.1253	0.2202	0.124
TMEM39B	1545	AT	10			0	1	0.2672	0.0392	0.8597	0.7277	0.8694	0.7803	0.9085	0.8038	0.9023	0.8619	0.8721	0.9005	0.8742	0.8482	0.8876	0.8558	0.8873	0.8499	0.8452	0.8303	0.8153	0.8113	0.827	0.8804	0.85	0.8767	0.8634	0.7844	0.8459	0.8444	0.9255	0.8324	0.8424	0.8435	0.8468	0.9138	0.8041	0.8748	0.8564	0.8747	0.7798	0.876
TMEM39B	1546	ES	6	5	7.2	0	1	0.2735	0.0309	0.9666	1	0.9879	0.8857	0.9301	0.9477	1	0.9182	0.964	1	1	0.9692	1	0.9692	0.9422	0.9658	1	1	1	0.9718	0.9794	1	0.9666	1	1	0.9519	0.7601	0.9751	1	0.9666	1	0.9829	1	0.9403	0.9849	0.9836	0.9072	1	0.9739	0.9738
TMEM39B	1549	ES	05:06:00	3	7.2	0	1	0.3172	0.0555	1	1	0.9856	0.9145	0.9199	0.9712	1	0.7996	0.8354	0.7798	0.9064	0.9681	0.799	0.9669	0.8742	0.9625	0.9682	1	0.9018	0.9682	0.9529	0.9449	0.8483	0.9616	0.9403	0.9646	0.8342	0.9188	0.9484	0.8693	0.9608	0.962	0.9333	0.8544	0.9341	0.9714	0.8541	0.9443	0.9454	0.9247
TMEM39B	1552	ES	4	3	5	0	0.8055	0.3446	0.0484	0.0219	0.0685	0.0332	0.0381		0		0	0	0.1464	0	0	0.079	0		0.0278	0.0856	0.0332	0.0685		0.0933	0	0.0355	0	0	0			0.0169		0	0.0381		0	0.0514	0.021		0	0	0.0604
KPNA6	1553	AP	1			0	0.9709	0.2521	0.0214	1	1	0.9858	1	1	1	0.9862	0.9822	0.964	1	0.985	1	1	1	1	0.9803	1	1	0.9671	0.9816	1	0.9776	1	0.9862	1	1	1	1	0.9487	1	1	1	1	0.9827	0.9907	0.986	0.9792	1	1	1
KPNA6	1554	AP	2			0	0.9709	0.2521	0.02	0	0	0.0142	0	0	0	0.0138	0.0178	0.0095	0	0.015	0	0	0	0	0.0197	0	0	0	0.0184	0	0.0224	0	0.0138	0	0	0	0	0	0	0	0	0	0.0173	0.0093	0.014	0.0208	0	0	0
KPNA6	1555	AP	3			0	0.9709	0.1006	0.0088	0	0	0	0	0	0	0	0	0.0265	0	0	0	0	0	0	0	0	0	0.0329	0	0	0	0	0	0	0	0	0	0.0513	0	0	0	0	0	0	0	0	0	0	0
KPNA6	1556	AA	9.1	8	9.2	0	0.9782	0.0695	0.0047	1	1	1	1	1	1	1	1	1	1	1	1	1	1	1	1	1	1	1	1	1	1	1	1	1	1	1	1	1	1	1	1	1	1	1	1	1	1	1	1
KPNA6	1557	AD	5.2	5.1	6	0	0.9764	0.1411	0.0248	0.99	0.9614	0.9774	0.8589	1	1	1	0.9326	1	1	1	1	1	1	0.9658	1	0.9557	1	0.9786	1	1	1	0.9338	1	1	0.9331	1	1	0.8985	1	0.9721	0.97	1	1	0.9473	0.9845	0.9765	1	1	1
TXLNA	1558	AP	1			0	0.9964	0.6826	0.1018	0.6579	0.5204	0.73	0.7189	0.628	0.6428	0.6983	0.5768	0.7056	0.6896	0.6531	0.8174	0.6846	0.8246	0.643	0.7169	0.7552	0.6138	0.6789	0.6031	0.4754	0.61	0.6138	0.6695	0.5326	0.6001	0.5032	0.5587	0.6194	0.6418	0.2134	0.6713	0.6993	0.4281	0.6154	0.6574	0.6464	0.7664	0.6541	0.6846
TXLNA	1559	AP	2.1			0	0.9964	0.6826	0.1018	0.3421	0.4796	0.27	0.2811	0.372	0.3572	0.3017	0.4232	0.2944	0.3104	0.3469	0.1826	0.3154	0.1754	0.357	0.2831	0.2448	0.3862	0.3211	0.3969	0.5246	0.39	0.3862	0.3305	0.4674	0.3999	0.4968	0.4413	0.3805	0.3582	0.7866	0.3287	0.3007	0.572	0.3846	0.3426	0.3536	0.2336	0.3459	0.3154
CCDC28B	1560	AT	3			0	1	0.3191	0.0537	0.0566	0.1486	0.045	0.0809	0.0153	0.1804	0.0493	0.0513	0.0166	0.0516	0.0329	0.0472	0.0211	0.1284	0.0201	0.1457	0.1759	0.0715	0.0854	0.0972	0.0721	0.0519	0.0339	0.079	0.2107	0.1338	0.0804	0.1339	0.0506	0.0914	0.0443	0.1342	0.0862	0.0239	0.0571	0.0341	0.1566	0.0979	0.1354	0.0981
CCDC28B	1561	AT	6.3			0	1	0.3191	0.0537	0.9434	0.8514	0.955	0.9191	0.9847	0.8196	0.9507	0.9487	0.9834	0.9484	0.9671	0.9528	0.9789	0.8716	0.98	0.8543	0.8241	0.9285	0.9146	0.9028	0.9279	0.9481	0.9661	0.921	0.7893	0.8662	0.9196	0.8661	0.9494	0.9086	0.9557	0.8658	0.9138	0.9761	0.9429	0.9659	0.8434	0.9021	0.8646	0.9019
CCDC28B	1562	RI	6.2	6.1	6.3	0	0.9945	0.7943	0.1206	0.1445	0.4492	0.0703	0.5648	0.0506	0.4357	0.1125	0.0761	0.0892	0.1483	0.3229	0.2305	0.126	0.494	0.0516	0.351	0.3952	0.3207	0.1795	0.3155	0.2251	0.1697	0.1195	0.3144	0.255	0.5603	0.2428	0.2987	0.0815	0.3011	0.1273	0.2762	0.1378	0.1622	0.139	0.1142	0.3359	0.1043	0.2854	0.2731
CCDC28B	1563	AA	5.1	4	5.2	0	0.9927	0.0816	0.0079	0.9814	1	1	1	1	1	1	1	1	1	1	1	1	1	1	1	1	1	1	1	1	1	1	1	1	1	1	1	1	1	1	1	1	0.9814	1	1	1	1	1	1
IQCC	1564	AD	1.2	1.1	2	0	0.9073	1	0.2029	0.429	0.4246	0.4225	0.763	0.1827	0.6525	0.1102	0.1183	0.493	0.4459	0.4843	0.2511	1	0.309	0.2635	0.493	0.7772	0.4171	0.6822	0.315	0.5524	0.7469	0.5729	0.5961	0.3195	0.4459	0.8551	0.385	0.4246	0.3195	0.2565	0.6709	0.287	0.3917	0.5816	0.4518	0.5886	0.3764	0.3892	0.9376
TMEM234	1567	AT	5.9			0	0.9964	0.7012	0.1161	0.2881	0.5781	0.382	0.2455	0.1963	0.3447	0.15	0.2243	0.2458	0.2427	0.2764	0.4619	0.2418	0.2178	0.1903	0.4626	0.4823	0.3352	0.2268	0.2929	0.3959	0.2359	0.2123	0.1953	0.0484	0.4641	0.3842	0.416	0.1998	0.4017	0.1715	0.2229	0.4654	0.1449	0.3354	0.2464	0.4725	0.1255	0.3948	0.2849
TMEM234	1568	AT	7			0	0.9964	0.7012	0.1161	0.7119	0.4219	0.618	0.7545	0.8037	0.6553	0.85	0.7757	0.7542	0.7573	0.7236	0.5381	0.7582	0.7822	0.8097	0.5374	0.5177	0.6648	0.7732	0.7071	0.6041	0.7641	0.7877	0.8047	0.9516	0.5359	0.6158	0.584	0.8002	0.5983	0.8285	0.7771	0.5346	0.8551	0.6646	0.7536	0.5275	0.8745	0.6052	0.7151
TMEM234	1569	RI	6.2	6.1	6.3	0	0.9782	0.7258	0.1518	0.7444	0.8517	0.8601	0.7136	0.5027	0.6777	0.7478	0.7478	0.9149	1	0.8869	0.6832	0.8792	1	0.8601	0.8237	0.848	0.6546	0.5741	0.6026	0.9183	0.8156	0.8552	0.878	0.6402	0.7082	0.9429	0.7698	0.8717	0.8838	0.7882	0.7726	0.8017	0.8017	0.8622	0.7417	0.8337	0.7011	0.6777	0.8644
TMEM234	1570	RI	5.7	5.6	5.8	0	1	0.6042	0.0877	0.9363	0.9205	0.6185	0.7317	0.8832	0.9087	0.8408	0.8696	0.7901	0.9578	0.8224	0.645	0.7614	0.8419	0.7354	0.7118	0.8132	0.761	0.7307	0.7299	0.8245	0.9149	0.9078	0.8475	0.9629	0.8696	0.9087	0.8014	0.7851	0.8652	0.5443	0.8691	0.8892	0.9758	0.8687	0.9063	0.95	0.8128	0.8843	0.9296
TMEM234	1571	RI	5.5	5.4	5.6	0	1	0.462	0.0607	0.9308	0.9297	0.8424	0.8144	0.9754	0.9124	0.8755	0.8845	0.8276	0.9339	0.8136	0.8461	0.9391	0.8745	0.8588	0.8361	0.7459	0.862	0.9134	0.8235	0.8574	0.9349	0.8638	0.8805	0.9763	0.8688	0.9132	0.8579	0.8987	0.8955	0.667	0.8978	0.8862	0.9404	0.9491	0.8584	0.9393	0.9134	0.9249	0.897
TMEM234	1572	RI	5.2	5.1	5.3	0	0.8364	0.6209	0.1088	1	0.7985	1	1	0.8488		1	0.9345	0.9345	0.7603	0.7848	0.909	1		0.8134	0.8595		1	0.8473	1	1	0.8395	0.7923	1	1	1	0.8388	0.8409	0.8409	0.8226	0.9017	1	0.8134	1	0.921	0.823	1	1	1	0.9544
TMEM234	1573	RI	5.2:5.3	5.1	5.4	0	0.9964	0.68	0.0904	0.1677	0.1403	0.259	0.1257	0.225	0.1119	0.1807	0.2477	0.2255	0.1157	0.1031	0.2464	0.1349	0.0993	0.1129	0.1207	0.1598	0.2542	0.1553	0.1902	0.1694	0.1026	0.294	0.2257	0.1682	0.2345	0.1314	0.2146	0.1518	0.1849	0.1958	0.2161	0.1259	0.2223	0.2595	0.2024	0.2656	0.2051	0.2093	0.3729
TMEM234	1574	AA	5.3	5.1	5.4	0	0.9873	0.1586	0.0332	0	0.0462	0	0	0.0531	0	0	0.0253	0.0214	0.0417	0.0304	0.0341	0	0	0.029	0.0253	0	0	0.0312	0	0	0.0243	0.1083	0	0	0	0.0336	0.0566	0.0338	0.0468	0.0275	0	0.0352	0	0.033	0.0506	0	0	0	0.0304
TMEM234	1575	ES	4	3	5.1	0	0.9945	0.7776	0.1077	0.1764	0.3079	0.1987	0.2498	0.2516	0.2379	0.1948	0.2469	0.1927	0.2039	0.2404	0.2826	0.1293	0.3331	0.2595	0.3589	0.3807	0.3748	0.3079	0.212	0.2024	0.1906	0.2723	0.1135	0.1179	0.3711	0.263	0.4106	0.1918	0.1792	0.5751	0.3438	0.1658	0.2257	0.2084	0.1727	0.264	0.2333	0.2718	0.3582
TMEM234	1576	ES	02:03:04	1	5.1	0	0.9782	0.4679	0.0879	1	0.9044	1	1	1	1	0.7138	0.9493	0.9258	1	1	1	0.8409	1	1	1	1	1	1	1	1	1	1	1	1	1	1	1	0.8252	1	1	0.9066	1	1	1	0.8865	1	1	0.9162	1
TMEM234	1577	ES	02:03:00	1	5.1	0	1	0.1221	0.0178	1	0.9669	1	1	1	1	0.9363	0.9884	0.9876	1	1	1	0.9777	1	1	1	1	1	1	1	1	1	1	1	1	1	1	1	0.9752	1	1	0.9686	1	1	1	0.9837	1	1	0.9762	1
LCK	1579	AP	2			0	0.8418	0.951	0.218	0	0	0.951	0	0.0485	0.0342	0.1638	0.3467	0.2359	0.045	0	0	0.1182	0	0	0	0	0	0.0336	0.0697	0.0672	0.1539	0.0872	0.0525		0	0.1082	0	0.0892	0.3785	0.1239	0.6272	0.0294	0	0	0.7242			0.0132	0
LCK	1581	AP	1			0	0.8418	0.951	0.218	1	1	0.049	1	0.9515	0.9658	0.8362	0.6533	0.7641	0.955	1	1	0.8818	1	1	1	1	1	0.9664	0.9303	0.9328	0.8461	0.9128	0.9475		1	0.8918	1	0.9108	0.6215	0.876	0.3728	0.9706	1	1	0.2758			0.9868	1
LCK	1582	AA	10.1	9	10.2	0	0.7982	0.3819	0.0681		0.1858	0.049	0	0.0168	0.1858	0.1982		0.099	0.099	0.1311	0.1238	0.1748	0.0848		0.0761	0.0781		0.1314		0		0.09	0.2155		0.1292	0.1415	0.1875	0.0366	0.1292		0.09	0.0924	0.0707	0.1748	0.0825		0.0582	0.1384	0.1024
LCK	1583	ES	8	7	9	0	0.9891	0.3783	0.0536	1	0.8862	0.959	0.9723	0.9845	1	1	1	0.9583	1	0.9841	0.8846	0.9761	1	1	1	0.9892	0.8711	0.9642	1	0.9767	1	0.8604	0.9643	1	1	1	0.9163	1	1	1	0.9657	0.9588	0.9733	0.9797	1	1	0.8296	0.9907	0.9401
LCK	1584	RI	4.2	4.1	4.3	0	0.8309	0.7089	0.1166		0.2514	0.1477	0.1144	0.1309	0.0775	0.2815	0.2514	0.183	0.3455	0.1797	0.1355	0.2408	0.1119		0.141	0.1567	0.4212	0.1846		0.2187	0.0403	0.3217	0.2271		0.2873	0.183	0.2377	0.2514	0.183		0.0978	0.0915	0.0576	0.3136	0.0884	0.2235	0.4018	0.1725	0.106
HDAC1	1585	AP	1			0	1	0.0315	0.0033	0.9987	1	1	1	1	1	0.9968	0.9974	1	0.991	0.9933	1	1	1	1	1	1	0.9956	1	1	0.9959	1	0.9971	0.9962	1	1	1	1	0.9978	0.9939	0.9983	0.9982	0.9867	1	0.992	0.9987	1	0.9967	1	1
HDAC1	1586	AP	2			0	1	0.0315	0.0033	0.0013	0	0	0	0	0	0.0032	0.0026	0	0.009	0.0067	0	0	0	0	0	0	0.0044	0	0	0.0041	0	0.0029	0.0038	0	0	0	0	0.0022	0.0061	0.0017	0.0018	0.0133	0	0.008	0.0013	0	0.0033	0	0
BSDC1	1589	AT	10.2			0	1	0.0106	0.0009	0	0	0	0	0	0	0	0	0	0	0	0	0	0	0	0	0	0	0	0	0	0	0	0	0	0	0	0	0	0	0	0	0	0	0	0	0	0	0	0
BSDC1	1590	AT	11.3			0	1	0.0106	0.0009	1	1	1	1	1	1	1	1	1	1	1	1	1	1	1	1	1	1	1	1	1	1	1	1	1	1	1	1	1	1	1	1	1	1	1	1	1	1	1	1
BSDC1	1591	RI	11.2	11.1	11.3	0	1	0.3923	0.0632	0.0781	0.0669	0.2219	0.1031	0.0628	0.0798	0.0955	0.0478	0.1268	0.0736	0.0948	0.1075	0.1097	0.1483	0.0603	0.1063	0.1568	0.1484	0.1538	0.1424	0.1904	0.1477	0.2096	0.1616	0.2121	0.1464	0.1439	0.1516	0.1131	0.1569	0.0958	0.1935	0.1157	0.1156	0.1586	0.1339	0.069	0.1362	0.1171	0.2686
BSDC1	1592	ES	10.1	9	11.1	0	1	0.0856	0.0143	0.0468	0.025	0.0511	0.0166	0.0056	0.0096	0.0026	0.0425	0.0109	0.0066	0.0165	0.0096	0.0221	0.0384	0.0191	0.0188	0.024	0.0281	0.0067	0.0319	0.0382	0.0252	0.0046	0.0354	0	0.0156	0.0113	0.0179	0.0289	0.0249	0.0262	0.0249	0.0221	0.0154	0.0408	0.0195	0.0047	0.0258	0.0129	0.0545
BSDC1	1593	ES	6.2:7:8.1	6.1	8.2	0	1	0.0308	0.0039	0.9974	0.9887	1	1	0.9935	0.9946	1	0.9954	1	1	1	0.9932	0.9844	1	0.9956	1	1	1	0.9936	1	0.9948	1	1	1	1	0.9972	0.9948	0.9931	0.9904	0.9945	1	1	1	1	1	1	0.9955	1	0.9951	1
BSDC1	1594	ES	4.1:4.2:4.3:5	3	6.1	0	1	0.0585	0.0043	1	1	1	1	1	1	1	1	1	1	1	1	1	1	1	1	1	1	1	1	1	1	1	1	1	1	1	1	1	1	1	1	1	1	1	1	1	1	1	1
BSDC1	1595	ES	4.2:4.3:5	3	6.1	0	1	0.0132	0.0009	1	1	1	1	1	1	1	1	1	1	1	1	1	1	1	1	1	1	1	1	1	1	1	1	1	1	1	1	1	1	1	1	1	1	1	1	1	1	1	1
BSDC1	1598	AA	4.1:4.2	3	4.3	0	0.9927	0.4398	0.0671	0.9669	0.8043	0.9608	0.7666	0.9393	0.864	1	0.9184	0.9414	0.9548	1	0.8516	0.9235	0.9264	0.9116	1	0.9611	0.9447	0.9634	0.9024	0.8273	1	1	0.9567	0.889	0.8748	0.8054	0.8321	0.8981	0.952	1	0.9503	0.851	1	0.8616	0.8545	0.9057	0.919	0.8446	1
BSDC1	1599	AA	4.2	3	4.3	0	1	0.1025	0.0162	0.9915	0.9566	0.9884	0.9643	0.9894	0.9745	1	0.9799	0.9843	0.9799	1	0.9718	0.9867	0.9801	0.9808	1	0.9924	0.9885	0.9888	0.9759	0.9546	1	1	0.9836	0.9679	0.9597	0.9618	0.947	0.9842	0.9902	1	0.9864	0.9802	1	0.975	0.972	0.9725	0.9851	0.9655	1
BSDC1	1600	ES	4.1:4.2:4.3	3	5	0	0.9982	0.2199	0.0332	1	0.9294	0.9432	1	1	1	1	1	1	0.981	0.9413	0.9528	0.8407	0.9391	0.9748	0.9203	1	1	0.9714	0.9637	0.9699	1	0.9634	1	1	0.9862	0.9556	1	0.916	1	0.9657	0.9788	1	1	0.9734	0.9704	0.9794	1	1	0.9538
BSDC1	1601	ES	4.2:4.3	3	5	0	1	0.0348	0.0064	1	0.9866	0.9839	1	1	1	1	1	1	0.992	0.9908	0.992	0.9715	0.9843	0.995	0.9911	1	1	0.9917	0.992	0.9934	1	0.9915	1	1	0.9961	0.9928	1	0.9877	1	0.9939	0.9945	1	1	0.9958	0.995	0.9945	1	1	0.9912
BSDC1	1603	AA	4.1	3	4.2	0	1	0.3903	0.059	0.206	0.1652	0.2343	0.117	0.1555	0.1506	0.1792	0.1961	0.2192	0.3138	0.1419	0.1513	0.1518	0.2169	0.1783	0.0995	0.163	0.1743	0.2404	0.1976	0.1996	0.2158	0.1983	0.2798	0.2196	0.233	0.1496	0.2291	0.1275	0.1765	0.1555	0.2176	0.1109	0.1366	0.142	0.1512	0.2212	0.1532	0.1727	0.1673
BSDC1	1605	ES	3:4.1:4.2:4.3	2	5	0	0.9982	0.1963	0.0131	1	1	1	1	1	1	1	1	1	1	1	1	1	1	1	1	1	1	0.9688	1	1	1	0.959	1	1	1	1	1	1	1	1	1	1	1	1	1	1	1	1	1
BSDC1	1606	ES	3:4.2:4.3	2	5	0	1	0.0237	0.0022	1	1	1	1	1	1	1	1	1	1	1	1	1	1	1	1	1	1	0.992	1	1	1	0.9914	1	1	1	1	1	1	1	1	1	1	1	1	1	1	1	1	1
ZBTB8A	1609	AA	5.1	4	5.2	0	0.9927	0.5501	0.1091	0.7598	0.8307	0.9005	0.9273	0.8729	0.7284	0.6883	0.7393	0.8614	0.5454	0.5668	0.9336	0.8614	0.7104	0.6777	0.8096	0.8307	0.9016	0.6496	0.9175	0.935	0.6206	0.8548	0.4499	0.9128	0.5887	0.797	0.5338	0.696	0.8035	0.8367	0.845	0.7533	0.878	0.8275	0.6977	0.6126	0.5563	0.8396	0.7622
ZBTB8OS	1610	AT	8			0	1	0.4487	0.0745	0.1334	0.1434	0.3165	0.2749	0.2022	0.2745	0.205	0.1128	0.1508	0.2241	0.0827	0.2316	0.105	0.1056	0.1813	0.1274	0.1798	0.1203	0.2162	0.1839	0.2041	0.0984	0.1393	0.1106	0.1219	0.1203	0.107	0.0816	0.2046	0.1433	0.3474	0.2658	0.1481	0.1107	0.2244	0.3381	0.1177	0.2208	0.2124	0.1709
ZBTB8OS	1611	AT	7			0	1	0.4487	0.0745	0.8666	0.8566	0.6835	0.7251	0.7978	0.7255	0.795	0.8872	0.8492	0.7759	0.9173	0.7684	0.895	0.8944	0.8187	0.8726	0.8202	0.8797	0.7838	0.8161	0.7959	0.9016	0.8607	0.8894	0.8781	0.8797	0.893	0.9184	0.7954	0.8567	0.6526	0.7342	0.8519	0.8893	0.7756	0.6619	0.8823	0.7792	0.7876	0.8291
ZBTB8OS	1612	ES	5	4	6	0	1	0.3416	0.052	0.9261	0.8299	0.8634	0.9011	0.8662	0.8729	0.839	0.8973	0.8079	0.8047	0.8058	0.8458	0.8159	0.8391	0.9163	0.7936	0.8157	0.8505	0.857	0.8895	0.8789	0.9617	0.8766	0.8728	0.8843	0.9001	0.8144	0.8508	0.785	0.8609	0.8022	0.824	0.8095	0.732	0.8317	0.8185	0.8016	0.9251	0.9075	0.8563
RBBP4	1615	AP	1			0	1	0.0311	0.0022	1	1	1	1	1	1	1	1	0.9981	1	1	1	1	1	1	0.9952	1	1	1	1	1	1	1	1	1	1	1	1	1	1	1	1	1	1	0.9955	1	1	1	1	1
RBBP4	1616	AP	2			0	1	0.0311	0.0022	0	0	0	0	0	0	0	0	0.0019	0	0	0	0	0	0	0.0048	0	0	0	0	0	0	0	0	0	0	0	0	0	0	0	0	0	0	0.0045	0	0	0	0	0
RBBP4	1622	AA	14.1	13	14.2	0	1	0.0132	0.0021	1	1	1	1	0.9955	0.9964	0.9947	0.9977	0.9994	1	1	0.9943	1	0.9969	1	1	1	1	0.9984	1	1	1	0.9968	0.994	1	0.9984	0.9979	1	0.9981	0.9985	0.9978	0.9973	1	0.999	1	0.9969	1	0.9973	1	0.9963
RBBP4	1623	ES	5	4	6	0	1	0.4597	0.0607	0.0252	0.1612	0.0629	0.1229	0.088	0	0	0	0.0221	0	0	0.1691	0.1886	0	0.0785	0.0762	0	0.105	0.1189	0	0	0.0599	0.0383	0.1664	0	0	0	0.1428	0.0581	0.0702	0.0745	0.1266	0	0.0795	0	0.0498	0.0429	0.1759	0.1102	0.0949
RBBP4	1625	ES	4	3.2	6	0	1	0.0068	0.0006	1	1	1	1	0.9963	1	1	1	1	1	1	1	1	1	1	1	0.9959	1	1	1	1	1	1	1	1	1	1	1	1	1	1	1	1	1	1	1	1	1	1	1
RBBP4	1627	ES	04:06:00	3.2	7	0	1	0.0358	0.006	0.9897	1	0.9886	0.9882	0.9869	0.9956	0.9866	0.9848	0.9871	0.9932	0.9928	0.9844	0.9924	0.989	0.9924	0.9877	1	0.9955	0.9871	0.9883	0.9941	0.9858	0.9895	0.9864	0.9852	0.9916	0.9708	0.9864	0.9826	0.9905	0.9857	0.9796	0.988	0.9902	0.9911	0.9864	0.9911	1	0.9968	0.9936
RBBP4	1629	AA	3.1	1	3.2	0	1	0.0959	0.0137	0.9876	1	0.9897	1	1	1	0.9653	0.9803	0.9864	0.9681	0.9827	0.941	0.9644	0.9592	1	0.9918	1	0.9786	0.9555	0.9648	0.9789	0.9904	0.9836	0.9775	0.9826	0.973	0.9889	0.973	0.9799	0.9857	0.9892	0.9662	0.9815	0.9866	0.9804	0.9852	0.9683	1	0.99	0.9742
KIAA1522	1631	AP	2			0	0.9891	0.8821	0.1559	0.7999	0.5877	0.53	0.3859	0.6046	0.3835	0.6755	0.6717	0.7435	0.5184	0.8611	0.6616	0.5851	0.6161	0.2574	0.578	0.5328	0.6739	0.6311	0.672	0.6651	0.7891	0.698	0.6749	0.6759	0.6671	0.5383	0.6365	0.4791	0.6311	0.6408	0.5889	0.7738	0.7789	0.8436	0.7283	0.5768	0.5506	0.4416	0.6878
KIAA1522	1632	AP	1			0	0.9891	0.8821	0.1566	0.1967	0.4123	0.47	0.6141	0.3954	0.6165	0.3245	0.3158	0.2519	0.4816	0.1338	0.3384	0.4149	0.3839	0.7161	0.4102	0.4672	0.3151	0.3689	0.3142	0.3256	0.2085	0.302	0.3132	0.3119	0.3282	0.4425	0.34	0.5174	0.3689	0.3529	0.3946	0.2262	0.2211	0.1564	0.2568	0.4108	0.4254	0.5418	0.2921
KIAA1522	1633	AP	3			0	0.9891	0.0838	0.0113	0.0035	0	0	0	0	0	0	0.0125	0.0046	0	0.0052	0	0	0	0.0265	0.0118	0	0.011	0	0.0138	0.0093	0.0024	0	0.0119	0.0122	0.0048	0.0192	0.0235	0.0035	0	0.0063	0.0164	0	0	0	0.0149	0.0125	0.024	0.0166	0.0202
KIAA1522	1634	ES	07:08:00	6	9	0	1	0.1008	0.0113	0.9985	1	0.9889	1	1	0.9908	0.9907	0.9922	0.9944	0.9918	0.9982	1	0.9945	1	1	0.9945	1	1	0.9886	0.9968	0.9964	1	0.9967	1	1	1	0.9925	1	0.9983	1	0.9949	0.9972	1	0.964	0.9973	0.9973	0.995	1	0.9977	0.9873
S100PBP	1635	AT	9			0	1	0.6665	0.101	0.5126	0.3889	0.4409	0.5224	0.6194	0.466	0.4607	0.3889	0.4553	0.4472	0.5515	0.5551	0.5696	0.5133	0.4576	0.5151	0.4584	0.4935	0.4459	0.3939	0.4314	0.406	0.4628	0.5198	0.4451	0.5072	0.5219	0.4669	0.4395	0.5097	0.4781	0.4519	0.5177	0.5852	0.4972	0.581	0.5499	0.4805	0.4246	0.444
S100PBP	1636	AT	7			0	1	0.6665	0.101	0.4874	0.6111	0.5591	0.4776	0.3806	0.534	0.5393	0.6111	0.5447	0.5528	0.4485	0.4449	0.4304	0.4867	0.5424	0.4849	0.5416	0.5065	0.5541	0.6061	0.5686	0.594	0.5372	0.4802	0.5549	0.4928	0.4781	0.5331	0.5605	0.4903	0.5219	0.5481	0.4823	0.4148	0.5028	0.419	0.4501	0.5195	0.5754	0.556
S100PBP	1637	AA	4.1	3	4.2	0	0.9964	0.8612	0.0958	0.7696	0.6171	0.4462	0.5752	0.7154	0.7946	0.7838	0.5919	0.7074	0.7355	0.6286	0.6967	0.6074	0.7074	0.6929	0.6592	0.7074	0.1388	0.7538	0.7303	0.8212	0.5801	0.7326	0.392	0.5919	0.6592	0.8012	0.6833	0.7719	0.5991	0.6661	0.5473	0.7822	0.7437	0.7505	0.6902	0.6503	0.5991	0.6128	0.6929
S100PBP	1638	AD	1.2	1.1	2	0	0.9309	0.4027	0.0839	0.8363	1	1	0.8812	1	0.8447	0.8165	1	0.8558	0.9038	0.7982	1	1	0.899	0.8165	0.8697	0.5973	0.7627	0.8812	1	0.7479	1	0.8654	0.8654	1	0.9223	1	1	0.7758	1	0.9468	0.9495	1	1	0.9438	1	0.9326	0.8078	1	0.8078
FNDC5	1641	AT	6.2			0	0.9964	0.7114	0.1372	0.0734	0.1365	0.1422	0.172	0	0.2724	0	0.1075	0.5618	0.314	0.293	0.2391	0.3337	0.182	0.1907	0.2296	0.2503	0	0.3599	0.1126	0.0802	0.1223	0.1722	0.3712	0.267	0.0756	0.0361	0	0.1638	0.231	0.1292	0.2583	0.308	0.2108	0.2525	0.178	0.2108	0.1335	0	0.1242
FNDC5	1642	AT	7			0	0.9964	0.7114	0.1372	0.9266	0.8635	0.8578	0.828	1	0.7276	1	0.8925	0.4382	0.686	0.707	0.7609	0.6663	0.818	0.8093	0.7704	0.7497	1	0.6401	0.8874	0.9198	0.8777	0.8278	0.6288	0.733	0.9244	0.9639	1	0.8362	0.769	0.8708	0.7417	0.692	0.7892	0.7475	0.822	0.7892	0.8665	1	0.8758
TMEM54	1644	ES	00:03:04.100000	2	4.2	0	1	0.0406	0.0035	0.9964	1	0.9952	1	0.9956	1	0.9939	0.9948	1	1	0.9985	1	0.9931	0.998	1	0.9977	1	0.9985	0.9982	1	0.9979	0.999	0.9983	0.9981	0.9968	0.994	0.9986	0.9973	0.9978	1	0.9987	0.9965	1	0.9983	0.9921	1	0.9984	0.9967	0.9961	0.9989
TMEM54	1645	ES	3	2	4.2	1	0.7618	0.4398	0.0724	0.8534		0.8665		0.8722		0.7776	0.8442			0.9461		0.8424	0.873				0.9076	0.9309		0.8705	0.975	0.9513	0.9396	0.9054	0.7838	0.9362	0.9314	0.9263		0.9617	0.918		0.9671	0.7724		0.8989	0.9264	0.9195	0.9429
RNF19B	1646	AA	9.1	8	9.2	0	1	0.3474	0.056	0.1954	0.2955	0.1068	0.194	0.2235	0.2824	0.1672	0.2889	0.11	0.1933	0.1181	0.2322	0.1665	0.2069	0.2183	0.3076	0.2381	0.2951	0.1513	0.2403	0.2548	0.256	0.2983	0.2147	0.1753	0.2004	0.2983	0.1622	0.2797	0.2418	0.1582	0.2322	0.2609	0.2165	0.2821	0.2887	0.1799	0.312	0.2196	0.232
RNF19B	1647	AA	3.1	2	3.2	0	1	0.4829	0.048	0.205	0.2135	0.1621	0.2864	0.2388	0.2271	0.2181	0.1864	0.2616	0.2378	0.2499	0.1947	0.2158	0.2395	0.1983	0.1566	0.2969	0.2217	0.2293	0.2438	0.2463	0.2235	0.2661	0.1535	0.3465	0.1586	0.2087	0.3296	0.2471	0.258	0.1872	0.185	0.1901	0.2015	0.2366	0.1889	0.2066	0.1691	0.2661	0.1571
AK2	1649	AT	6			0	1	0.1595	0.0175	0.0143	0.012	0.0308	0.004	0.0102	0.0046	0.0322	0.0614	0.0142	0.0188	0.0097	0.0062	0.0123	0.0126	0.0015	0.0052	0.0029	0.0177	0.0091	0.0143	0.0295	0.1599	0.0774	0.0026	0.003	0.0138	0.0173	0.0106	0.017	0.0089	0.0698	0.0081	0.0023	0.011	0.0194	0.0279	0.0217	0.0059	0.0087	0.039
AK2	1650	AT	8.2			0	1	0.5244	0.0997	0.7069	0.4466	0.5912	0.4046	0.5283	0.3951	0.6994	0.6465	0.5616	0.6048	0.6422	0.5382	0.5904	0.6049	0.6242	0.4587	0.4632	0.7289	0.6082	0.6857	0.5668	0.5812	0.4841	0.4812	0.5878	0.6779	0.5894	0.6032	0.6224	0.5921	0.6357	0.4241	0.5051	0.7096	0.5683	0.5578	0.5965	0.7242	0.6199	0.6941
AK2	1651	AT	10			0	1	0.5118	0.102	0.2788	0.5414	0.3781	0.5914	0.4614	0.6003	0.2685	0.2921	0.4242	0.3764	0.3481	0.4556	0.3974	0.3824	0.3742	0.536	0.5339	0.2534	0.3827	0.3	0.4037	0.2589	0.4385	0.5162	0.4092	0.3083	0.3933	0.3862	0.3606	0.399	0.2945	0.5678	0.4926	0.2794	0.4124	0.4143	0.3818	0.2699	0.3714	0.267
AK2	1652	ES	9	8.1	10	0	1	0.5005	0.051	0.0993	0.098	0.052	0.0451	0.0171	0.0552	0.0874	0.0454	0.0417	0.0411	0.117	0.0655	0.153	0.0937	0.1001	0.0903	0.0943	0.0524	0.144	0.2431	0.1595	0.0447	0.0698	0.0992	0.1643	0.2538	0.0929	0.1901	0.0986	0.1446	0.048	0.0645	0.0287	0.0672	0.1254	0.0859	0.0573	0.0478	0.0959	0.2061
AK2	1653	ES	5	4	7	0	1	0.1237	0.0176	0.9885	0.993	0.9927	0.9888	0.966	0.9785	0.9891	0.9699	0.9803	0.9956	0.985	0.9887	0.9406	0.9925	0.9907	0.9816	0.9789	0.9906	0.9844	0.9881	0.9844	0.9876	0.9643	0.9705	0.9716	0.9286	0.9582	0.9889	0.9703	0.9671	0.9864	0.9744	0.9781	0.9824	0.9644	0.9361	0.9579	0.9973	0.9728	0.9731
AK2	1654	ES	02:03:00	1	4	0	1	0.3214	0.0567	0.9318	0.9418	1	0.9613	0.9391	0.9533	0.9614	0.9437	0.8225	1	0.9714	0.9553	0.9431	1	0.9736	0.9475	0.9757	0.9276	0.8018	0.9126	1	0.906	0.9184	0.8779	0.9737	0.9444	0.9732	0.9458	0.904	0.8046	0.9087	0.9258	1	0.938	0.9673	0.8792	0.9341	1	0.8832	0.9265
AK2	1655	ES	3	1	4	0	1	0.0183	0.0034	0.9929	0.9848	1	0.9916	0.9971	0.9902	0.9986	0.9946	0.9963	1	0.9981	0.9905	0.9966	1	0.9983	0.993	0.9969	0.9929	0.9837	0.9882	1	0.995	0.9945	0.9923	0.9975	0.9955	0.9972	0.994	0.9942	0.9908	0.9953	0.9958	1	0.9943	0.9956	0.9908	0.9961	1	0.9937	0.9964
AK2	1656	ES	2	1	3	0	1	0.4775	0.04	0.106	0.2443	0.1146	0.2058	0.0546	0.1923	0.041	0.1023	0.0222	0.1018	0.0731	0.2025	0.0669	0.0769	0.0691	0.1328	0.1352	0.1038	0.0764	0.1367	0.14	0.0594	0.0715	0.0633	0.1019	0.0859	0.1118	0.115	0.0633	0.0462	0.0521	0.0611	0.1088	0.0924	0.1384	0.077	0.0627	0.0671	0.0573	0.0508
ADC	1659	AT	13			0	0.9964	0.6084	0.1049	0.8262	0.82	0.9099	0.7736	0.7843	1	0.8262	0.7728	0.9382	0.86	0.8971	0.9545	0.9125	0.7871	0.8874	0.9503	1	0.7384	0.9152	0.8174	0.857	0.7507	0.8867	0.7882	1	0.9309	0.9472	0.9173	0.9553	1	0.9021	0.6577	0.9247	0.858	0.8309	0.65	0.9423	1	0.6554	0.7039
ADC	1660	AT	11			0	0.9964	0.6084	0.1049	0.1738	0.18	0.0901	0.2264	0.2157	0	0.1738	0.2272	0.0618	0.14	0.1029	0.0455	0.0875	0.2129	0.1125	0.0497	0	0.2616	0.0848	0.1826	0.143	0.2493	0.1133	0.2118	0	0.0691	0.0528	0.0827	0.0447	0	0.0979	0.3423	0.0753	0.142	0.1691	0.35	0.0577	0	0.3446	0.2961
ADC	1662	ES	06:07:08	5	9	0	0.9891	0.3211	0.0262	1	1	1	1	1	1	1	1	1	1	1	1	1	1	0.9642	0.9665	1	1	1	1	1	1	1	1	1	1	1	1	1	1	1	1	1	1	1	1	0.9456	1	1	1
TRIM62	1665	AP	1			0	0.9764	0.4095	0.0433	0.9799	1	1	1	0.9424	1	0.9303	1	1	1	1	1	1	1	1	1	0.9341	0.9608	0.7772	0.9502	1	1	1	0.9316	1	0.9656	0.9572	1	1	0.9214	1	1	1	1	1	0.9774	1	1	1	1
TRIM62	1666	AP	2			0	0.9764	0.4095	0.0433	0.0201	0	0	0	0.0576	0	0.0697	0	0	0	0	0	0	0	0	0	0.0659	0.0392	0.2228	0.0498	0	0	0	0.0684	0	0.0344	0.0428	0	0	0.0786	0	0	0	0	0	0.0226	0	0	0	0
PHC2	1670	AP	10			0	0.9909	0.5057	0.0871	0.8119	0.9294	0.8779	0.8992	0.9234	0.9166	0.803	0.7286	0.9052	0.8752	0.9156	0.8944	0.9359	0.8962	0.7779	0.8866	0.8696	0.9293	0.9758	0.9406	0.844	0.803	0.7295	0.7032	0.8636	0.7861	0.9085	0.8418	0.8391	0.789	0.7509	0.52	0.7932	0.9152	0.8505	0.8467	0.7542	0.7421	0.8617	0.7057
PHC2	1671	AP	1			0	0.9909	0.5057	0.0871	0.1881	0.0706	0.1221	0.1008	0.0766	0.0834	0.197	0.2714	0.0948	0.1248	0.0844	0.1056	0.0641	0.1038	0.2221	0.1134	0.1304	0.0707	0.0242	0.0594	0.156	0.197	0.2705	0.2968	0.1364	0.2139	0.0915	0.1582	0.1609	0.211	0.2491	0.48	0.2068	0.0848	0.1495	0.1533	0.2458	0.2579	0.1383	0.2943
PHC2	1674	AT	16			0	1	0.0717	0.0083	0.0114	0.0204	0.0193	0.014	0.0148	0.0161	0.0104	0.0047	0.019	0.0141	0.0101	0.0086	0.0166	0.0027	0.0081	0.0183	0.0176	0.0127	0.0176	0.0271	0.024	0.0113	0.0263	0.0182	0.0273	0.0219	0.0202	0.0198	0.0146	0.0209	0.0129	0.0193	0.0159	0	0.0172	0.0049	0.0021	0.0085	0.0136	0.0241
PHC2	1675	AT	17			0	1	0.0717	0.0083	0.9886	0.9796	0.9807	0.986	0.9852	0.9839	0.9896	0.9953	0.981	0.9859	0.9899	0.9914	0.9834	0.9973	0.9919	0.9817	0.9824	0.9873	0.9824	0.9729	0.976	0.9887	0.9737	0.9818	0.9727	0.9781	0.9798	0.9802	0.9854	0.9791	0.9871	0.9807	0.9841	1	0.9828	0.9951	0.9979	0.9915	0.9864	0.9759
ZSCAN20	1678	AT	6.2			0	1	0.6976	0.1236	0.4464	0.6505	0.4168	0.502	0.4286	0.6251	0.6727	0.415	0.3588	0.4295	0.3544	0.4459	0.3871	0.4013	0.4654	0.4822	0.5056	0.49	0.5287	0.4557	0.4896	0.3737	0.3551	0.5137	0.5784	0.5373	0.5031	0.647	0.3844	0.4459	0.3062	0.4431	0.5325	0.4566	0.4155	0.2954	0.4873	0.5298	0.4977	0.3762
ZSCAN20	1679	AT	8			0	1	0.6976	0.1236	0.5536	0.3495	0.5832	0.498	0.5714	0.3749	0.3273	0.585	0.6412	0.5705	0.6456	0.5541	0.6129	0.5987	0.5346	0.5178	0.4944	0.51	0.4713	0.5443	0.5104	0.6263	0.6449	0.4863	0.4216	0.4627	0.4969	0.353	0.6156	0.5541	0.6938	0.5569	0.4675	0.5434	0.5845	0.7046	0.5127	0.4702	0.5023	0.6238
CSMD2	1687	AT	50			0	1	0.7938	0.1791	0.6432	0.8398	0.3494	0.9401	0.4787	0.8329	0.6966	0.5912	0.3923	0.5592	0.6272	0.8357	0.2999	0.5629	0.6267	0.78	0.7766	0.7775	0.4764	0.6146	0.6167	0.5808	0.7178	0.6085	0.8219	0.7515	0.3677	0.6453	0.4413	0.6157	0.3737	0.4086	0.8877	0.5203	0.7085	0.5258	0.7468	0.8486	0.5433	0.7521
CSMD2	1688	AT	51			0	1	0.3392	0.0693	0.0815	0.0543	0.0562	0	0.0976	0	0.231	0	0.0416	0.0877	0.1327	0	0.1476	0.157	0.0702	0	0	0.0397	0.0672	0.0422	0.1078	0.1701	0.0622	0.0622	0	0.0262	0.2044	0.0795	0.1589	0.0657	0.1407	0.1251	0	0.1191	0.113	0.1699	0	0	0.0448	0.0469
CSMD2	1689	AT	78			0	1	0.6855	0.1125	0.1971	0.106	0.2846	0.0599	0.3145	0.0779	0.0725	0.2388	0.4377	0.1762	0.2107	0.1643	0.3705	0.2519	0.2626	0.22	0.1824	0.1828	0.2491	0.2825	0.2534	0.2491	0.2199	0.1951	0.0497	0.1279	0.3719	0.218	0.3769	0.3187	0.2323	0.2545	0.1123	0.0864	0.1786	0.2717	0.2099	0.1514	0.283	0.1504
CSMD2	1690	AT	17.2			0	1	0.5576	0.089	0.0782	0	0.3099	0	0.1092	0.0893	0	0.17	0.1283	0.1768	0.0294	0	0.1821	0.0283	0.0404	0	0.0409	0	0.2073	0.0607	0.0222	0	0	0.1342	0.1284	0.0943	0.056	0.0572	0.0229	0	0.2533	0.2118	0	0.2742	0	0.0326	0.0433	0	0.1289	0.0506
SMIM12	1697	AP	1.1			0	1	0.1705	0.0272	0.9482	0.916	0.9826	0.9487	0.9696	0.9306	0.9698	0.963	0.9396	0.9313	0.977	0.9431	0.948	0.972	0.9711	0.9552	0.9279	0.9617	0.9935	0.9766	0.9298	0.9534	0.9365	0.9516	0.9597	0.8882	0.8974	0.9321	0.9495	0.9764	0.9682	0.932	0.9474	0.9957	0.9492	0.9388	0.984	0.9788	0.9594	0.9704
SMIM12	1698	AP	2.1			0	1	0.1705	0.0272	0.0518	0.084	0.0174	0.0513	0.0304	0.0694	0.0302	0.037	0.0604	0.0687	0.023	0.0569	0.052	0.028	0.0289	0.0448	0.0721	0.0383	0.0065	0.0234	0.0702	0.0466	0.0635	0.0484	0.0403	0.1118	0.1026	0.0679	0.0505	0.0236	0.0318	0.068	0.0526	0.0043	0.0508	0.0612	0.016	0.0212	0.0406	0.0296
SMIM12	1699	AT	7			0	1	0.1336	0.02	0.0511	0.0432	0.0745	0.0481	0.0234	0.0514	0.0322	0.0417	0.0368	0.0552	0.0413	0.0409	0.0348	0.0415	0.0317	0.0427	0.0498	0.0425	0.0565	0.0853	0.0746	0.0416	0.0414	0.0655	0.0559	0.06	0.0442	0.0855	0.034	0.0541	0.0415	0.0608	0.0324	0.0228	0.0724	0.0528	0.0443	0.0755	0.0444	0.0549
SMIM12	1700	AT	4.2			0	1	0.1336	0.02	0.9489	0.9568	0.9255	0.9519	0.9766	0.9486	0.9678	0.9583	0.9632	0.9448	0.9587	0.9591	0.9652	0.9585	0.9683	0.9573	0.9502	0.9575	0.9435	0.9147	0.9254	0.9584	0.9586	0.9345	0.9441	0.94	0.9558	0.9145	0.966	0.9459	0.9585	0.9392	0.9676	0.9772	0.9276	0.9472	0.9557	0.9245	0.9556	0.9451
SMIM12	1701	AD	1.3	1.2	4.1	0	0.9964	0.4878	0.1041	0.5815	0.9314	1	0.7354	1	1	0.8682	0.8475	0.9434	0.6937	0.7424	0.6494	1	1	1	0.8143	0.6674	0.9314	0.9106	0.7458	1	0.7458	1	0.8717	0.8995	0.9142	0.8317	0.8544	1	1	0.7522	0.9633	0.8742	0.7875	0.8892	0.703	0.8929	1	0.9106	0.9314
SMIM12	1702	AD	1.2:1.3	1.1	4.1	0	1	0.2443	0.0392	0.0721	0.2188	0.1591	0.1169	0.223	0.1013	0.2188	0.1476	0.1459	0.1003	0.0936	0.1012	0.1285	0.1425	0.0785	0.1366	0.1818	0.1429	0.1352	0.113	0.0962	0.1076	0.1547	0.1268	0.149	0.1683	0.1779	0.131	0.2807	0.0886	0.1147	0.1872	0.1172	0.1048	0.0904	0.0788	0.0666	0.0853	0.105	0.1344
SMIM12	1703	AD	1.2	1.1	4.1	0	1	0.1221	0.018	0.0515	0.0186	0	0.0442	0	0	0.0421	0.0285	0.01	0.04	0.033	0.0582	0	0	0	0.0403	0.0977	0.0117	0.0175	0.0455	0	0.044	0	0.0178	0.0163	0.0167	0.0454	0.0329	0	0	0.0457	0.0091	0.0208	0.0386	0.0191	0.0338	0.009	0	0.0118	0.0136
GJB3	1704	AP	1			0	0.9273	1	0.179	0.7189	1	1	0.7251	0.7458		0.4648	0.5226	0.5644	0.6378	0.6114		0.8324	0.5296	0.6311	0.5528	1	0.4541	0.5187	0.7026	0.8194	0.774	0.37	0.699	0.486	0.529	0.787	0.6654	0.4395	0.5493	0.5898	0.5467	0.7251	0.4972	0.7807	0.7685	0.6351	0.4554	0.8108	0.5168
GJB3	1705	AP	2			0	0.9273	1	0.179	0.2811	0	0	0.2749	0.2542		0.5352	0.4774	0.4356	0.3622	0.3886		0.1676	0.4704	0.3689	0.4472	0	0.5459	0.4813	0.2974	0.1806	0.226	0.63	0.301	0.514	0.471	0.213	0.3346	0.5605	0.4507	0.4102	0.4533	0.2749	0.5028	0.2193	0.2315	0.3649	0.5446	0.1892	0.4832
ZMYM6	1708	AP	1			0	0.9745	0.7684	0.1308	0.5475	0.7881	0.5699	0.489	0.5925	0.4722	0.6265	0.6761	0.6291	0.5229	0.3429	0.3325	0.4946	0.4103	0.4103	0.4506	0.4209	0.4016	0.5925	0.5516	0.4589	0.4773	0.4946	0.2069	0.5561	0.7147	0.5059	0.4589	0.6867	0.4391	0.5336	0.6588	0.4606	0.5781	0.5295	0.4085	0.3362	0.6379	0.7014	0.4195
ZMYM6	1709	AP	2			0	0.9745	0.7684	0.1308	0.4525	0.2119	0.4301	0.511	0.4075	0.5278	0.3735	0.3239	0.3709	0.4771	0.6571	0.6675	0.5054	0.5897	0.5897	0.5494	0.5791	0.5984	0.4075	0.4484	0.5411	0.5227	0.5054	0.7931	0.4439	0.2853	0.4941	0.5411	0.3133	0.5609	0.4664	0.3412	0.5394	0.422	0.4705	0.5915	0.6638	0.3621	0.2986	0.5805
ZMYM6	1710	AT	18			0	1	0.3146	0.0475	0.27	0.299	0.2443	0.3429	0.3424	0.3303	0.2927	0.2975	0.3549	0.2979	0.3639	0.3405	0.3812	0.345	0.3719	0.3433	0.3557	0.416	0.2904	0.295	0.3837	0.3043	0.4072	0.3559	0.3982	0.3516	0.3812	0.2785	0.3057	0.3522	0.354	0.2516	0.2961	0.3365	0.34	0.3174	0.2808	0.2482	0.318	0.4385
ZMYM6	1711	AT	6.2			0	1	0.3277	0.0486	0.2786	0.1657	0.3613	0.1165	0.0826	0.0914	0.1623	0.1905	0.0669	0.1873	0.0815	0.1075	0.1162	0.1444	0.0576	0.1159	0.0862	0.1111	0.1636	0.2032	0.1535	0.1389	0.1172	0.0888	0.0623	0.1018	0.121	0.1272	0.1578	0.0472	0.1507	0.1966	0.1164	0.0993	0.0991	0.1565	0.1465	0.196	0.1027	0.0977
ZMYM6	1712	AT	20			0	1	0.3344	0.0482	0.4513	0.5353	0.3944	0.5406	0.575	0.5783	0.545	0.512	0.5782	0.5149	0.5546	0.5519	0.5026	0.5106	0.5705	0.5408	0.5581	0.473	0.5459	0.5018	0.4628	0.5569	0.4756	0.5553	0.5396	0.5466	0.4978	0.5944	0.5365	0.6006	0.4953	0.5518	0.5875	0.5641	0.5609	0.5261	0.5727	0.5558	0.5794	0.4638
ZMYM4	1716	ES	10:11:00	9	12	0	0.9982	0.0339	0.0015	1	1	1	1	1	1	1	1	1	1	1	1	1	1	1	1	1	1	1	1	1	1	1	0.9661	1	1	1	1	1	1	1	1	1	1	1	1	1	1	1	1
KIAA0319L	1717	AP	12			0	0.9927	0.411	0.0438	0	0	0.0279	0.0218	0	0	0	0.0503	0.0645	0.02	0.0327	0.04	0.029	0.0332	0.0124	0	0	0.0572	0.0413	0.0139	0.0174	0.042	0.0197	0.0488	0.0517	0.0621	0.0241	0.0263	0	0.071	0	0	0	0.0974	0.0381	0	0.0454	0.0199	0.0609	0.0182
KIAA0319L	1718	AP	2.1			0	0.9927	0.6843	0.0815	0.8318	0.8907	0.8434	0.8619	0.7811	0.9406	0.7122	0.7378	0.7683	0.8534	0.8639	0.8367	0.7174	0.8133	0.7892	0.8154	0.8681	0.8177	0.8249	0.8173	0.8307	0.8273	0.8461	0.8406	0.6969	0.7655	0.7945	0.6797	0.7929	0.722	0.7724	0.7937	0.9075	0.6424	0.8371	0.8327	0.8074	0.7869	0.7437	0.7698
KIAA0319L	1719	AP	1			0	0.9927	0.4423	0.0672	0.1682	0.1093	0.1287	0.1164	0.2189	0.0594	0.2878	0.2119	0.1672	0.1265	0.1034	0.1232	0.2536	0.1535	0.1984	0.1846	0.1319	0.1251	0.1338	0.1688	0.1519	0.1307	0.1342	0.1106	0.2514	0.1724	0.1814	0.294	0.2071	0.207	0.2276	0.2063	0.0925	0.2602	0.1248	0.1673	0.1471	0.1932	0.1954	0.212
KIAA0319L	1723	AA	10.1	9	10.2	0	0.98	0.1299	0.0125	1	1	0.9751	0.9853	1	1	1	1	1	0.9877	0.9813	1	1	1	1	0.9859	0.9842	0.9869	1	1	1	1	1	0.9768	1	1	1	1	1	1	1	0.9849	1	0.9132	1	1	0.9817	1	1	0.9763
KIAA0319L	1724	ES	7	6	8	0	0.9982	0.0835	0.0095	1	1	1	1	1	1	1	1	1	1	1	0.9896	1	1	1	1	0.9745	1	1	1	1	0.9939	1	1	0.987	1	0.9881	1	1	1	1	1	1	0.9623	1	1	1	0.9849	1	0.9846
KIAA0319L	1725	ES	4	3	5	0	1	0.3784	0.0269	0.9876	0.9306	0.9757	0.9285	0.9699	1	1	0.9469	0.9803	0.9927	0.9874	0.9874	0.9425	1	0.9773	0.9598	0.9604	0.9784	0.946	1	0.9266	0.9938	0.9828	0.9711	0.9847	0.9787	0.9647	1	1	0.9509	0.981	0.9653	0.9875	0.9539	0.9698	0.9865	1	0.9715	0.9755	1
KIAA0319L	1726	AD	2.2	2.1	3	0	0.8382	0.1666	0.0262	0.0104	0	0.0303	0		0	0	0	0	0	0.0158	0.0299		0.0184	0.0184	0	0	0.0561	0	0.0361	0.0347	0	0	0	0	0.0239	0.0484	0.0818	0	0	0.0635	0.0184	0		0.0328	0.026	0.0077	0.0088	0	0.0218
NCDN	1727	AD	1.2:1.3	1.1	2	0	0.9909	0.2191	0.0163	1	1	1	1	1	1	1	1	1	1	1	1	1	1	1	1	1	1	1	1	1	1	1	1	1	1	1	1	1	1	1	1	1	1	1	1	1	1	1	1
NCDN	1728	ES	1.3	1.1	2	0	0.9455	0.1577	0.0142	1	1	1	1	1	1	1	1	1	1	1	1	1	1	1	1	1	1	1	1	1	1	1	1	1	1	1	1	1	1	1	1	1		1	1	1	1	1	1
NCDN	1729	RI	1.2	1.1	1.3	0	0.9891	0.8738	0.1325	0.4325	0.6091	0.254	0.5946	0.7435	0.7055	0.4454	0.4713	0.55	0.3662	0.386	0.4551	0.5607	0.3656	0.5316	0.6358	0.5946	0.7583	0.6236	0.5144	0.6776	0.3827	0.4539	0.7376	0.4886	0.4944	0.6835	0.4698	0.3611	0.5554	0.4013	0.5369	0.5735	0.6751	0.4912	0.3438	0.4148	0.5168	0.616	0.4632
CLSPN	1730	AT	25			0	1	0.7943	0.1526	0.5098	0.1472	0.5899	0.1072	0.603	0.1203	0.5831	0.5697	0.5546	0.594	0.3853	0.3429	0.5076	0.516	0.177	0.1001	0.2696	0.2085	0.6013	0.3465	0.346	0.5049	0.495	0.5013	0.4079	0.539	0.2849	0.4526	0.6834	0.5162	0.6091	0.5601	0.2624	0.5885	0.4838	0.6411	0.6226	0.5139	0.4403	0.5986
CLSPN	1731	AT	26			0	1	0.7943	0.1526	0.4902	0.8528	0.4101	0.8928	0.397	0.8798	0.4169	0.4303	0.4454	0.406	0.6147	0.6571	0.4924	0.484	0.823	0.8999	0.7304	0.7915	0.3987	0.6535	0.654	0.4951	0.505	0.4987	0.5921	0.4609	0.7151	0.5474	0.3166	0.4838	0.3909	0.4399	0.7376	0.4115	0.5162	0.3589	0.3774	0.4861	0.5597	0.4014
CLSPN	1732	AA	11.1	10	11.2	0	0.8855	0.2862	0.0412	1		0.94		0.94		0.9344	1	1	1	1		0.8038	1				1	1	1	1	1	0.9625	0.9387	1	1	0.7808	1	1	1	1	1		1	1	0.9687	1	0.94	1	1
CLSPN	1733	ES	9	8	10	0	0.9036	0.2359	0.027	1		1		1		1	0.9378	1	1	1		1	1			1		1	1	1	1	1	1	1	1	1	1	0.9303	1	1	0.9326		1	1	1	1	1	1	1
AGO1	1734	AP	1			0	0.8655	0.9603	0.2814	0	0	0.1898	0	0	0	0.8011	0.161	0	0.0839	0.1886	0	0.2622	0.638	0	0	0	0	0.2308	0.5535	0.2814	0.1285	0.9392	0.3767	0	0	0	0	0.8119	0.4228	0	0.1649	0	0.2011	0	0.0292	0	0.2872	0	0.7513
AGO1	1735	AP	2			0	0.8655	0.9603	0.2814	1	1	0.8102	1	1	1	0.1989	0.839	1	0.9161	0.8114	1	0.7378	0.362	1	1	1	1	0.7692	0.4465	0.7186	0.8715	0.0608	0.6233	1	1	1	1	0.1881	0.5772	1	0.8351	1	0.7989	1	0.9708	1	0.7128	1	0.2487
AGO3	1739	AT	7.2			0	1	0.3208	0.0507	0.0802	0.0851	0.0874	0.0366	0.1397	0.0407	0.1143	0.0508	0.0714	0.101	0.0559	0.0681	0.0188	0.1412	0.0409	0.0669	0.0919	0.089	0.1834	0.0293	0.0991	0.2337	0.2139	0.0696	0.1466	0.1189	0.0637	0.1336	0.0931	0.0741	0.1426	0.1783	0.106	0.0735	0.0761	0.0357	0.1241	0.1462	0.0764	0.178
AGO3	1740	AT	8			0	1	0.6299	0.1098	0.1795	0.2232	0.1335	0.1537	0.2932	0.2438	0.3198	0.2133	0.1405	0.2357	0.0452	0.1633	0.0198	0.36	0.189	0.193	0.1102	0.2492	0.1118	0.205	0.1559	0.2803	0.284	0.4284	0.4242	0.1871	0.1337	0.255	0.3909	0.0598	0.4336	0.2459	0.2523	0.4411	0.2106	0.1179	0.2027	0.1625	0.3208	0.4058
AGO3	1741	AT	22			0	1	0.7096	0.1234	0.7403	0.6917	0.7791	0.8096	0.5671	0.7155	0.5659	0.7359	0.7881	0.6633	0.8989	0.7687	0.9614	0.4987	0.7701	0.7401	0.7978	0.6617	0.7048	0.7656	0.745	0.4861	0.5021	0.5021	0.4291	0.694	0.8026	0.6114	0.5159	0.8661	0.4238	0.5758	0.6417	0.4853	0.7133	0.8464	0.6732	0.6913	0.6028	0.4163
AGO3	1742	ES	6	5	9	0	0.9673	0.251	0.0219	1	1	1	1	1	1	1	1	1	1	1	1	1	1	1	1	1		1	1	1	1	1	1	1	1	1		1	1	1	1		1	1	1	1	1	1	1
AGO3	1743	ES	4	3	5	0	0.9818	0.2405	0.029	1	1	1	1	1	1	1	1	1	1	1	0.8707	1	1	1	1	1	1	0.9309	1	1	1	0.9452	1	1	1	1	1	1	1	1	0.9619	1	1	1	1	1	1	1	0.9676
COL8A2	1749	AD	3.2	3.1	4	0	0.8582	0.2436	0.0333	1	1	1	0.9549	1	1	1	1	0.976	1	1	1	1	1	1	0.9563	1	1	1	0.9636	1	1	1	1	1	1	0.9808	1	1	0.9257	0.9364	1	1		1	1	1	1	1	1
TRAPPC3	1752	ES	4	3	5	0	1	0.146	0.0178	0.0187	0.0308	0.0334	0.0284	0.011	0	0.0118	0.0191	0.0154	0.013	0.0287	0.0208	0.0306	0.0131	0.0161	0.018	0.0365	0.0328	0.0211	0.0325	0.0523	0.0365	0.0474	0.0419	0.0205	0.0465	0.0413	0.0293	0.0055	0.0453	0.0274	0.0243	0.0115	0.0214	0.0394	0.015	0.033	0.0358	0.0118	0.035
TRAPPC3	1753	AD	1.3	1.2	2	0	1	0.2203	0.0323	0.9349	0.9427	1	1	0.9299	0.9524	1	1	0.9654	1	0.9505	1	0.9645	0.9676	1	0.964	1	1	1	1	0.9748	0.9243	1	0.8958	1	1	1	1	0.958	1	1	0.9387	1	1	1	0.9754	0.8687	0.9467	0.938	1
TRAPPC3	1754	AD	1.2:1.3	1.1	2	0	1	0.368	0.0586	0.1394	0.1569	0.2503	0.1561	0.3145	0.1898	0.2347	0.2063	0.14	0.1779	0.0907	0.1001	0.2442	0.2918	0.2002	0.1277	0.1033	0.199	0.1652	0.2213	0.314	0.1566	0.1708	0.2003	0.1706	0.1689	0.2336	0.1818	0.1662	0.2223	0.1498	0.1666	0.167	0.1626	0.1401	0.1698	0.1586	0.169	0.2035	0.0915
TRAPPC3	1755	AD	1.2	1.1	2	0	1	0.0683	0.0087	0.0155	0.0139	0	0	0.0366	0.013	0	0	0.0065	0	0.005	0	0.0145	0.0146	0	0.0062	0	0	0	0	0.0132	0.0194	0	0.0412	0	0	0	0	0.0109	0	0	0.0191	0	0	0	0.0058	0.0366	0.0124	0.0175	0
MAP7D1	1756	AP	9			0	0.9927	0.7697	0.1347	0.116	0.0681	0.1501	0.0726	0.0607	0.2587	0.0346	0	0.1877	0.1127	0.1586	0.1192	0.0391	0.1209	0.0911	0.2242	0.1944	0.0552	0.0628	0.2236	0.1139	0.0739	0.3235	0.2935	0.1077	0.3693	0.1533	0.198	0.3491	0.3239	0.0677	0.0692	0.1093	0.2223	0.1373	0.0532	0.0688	0.1236	0.2676	0.2152
MAP7D1	1757	AP	1			0	0.9927	0.7697	0.1347	0.884	0.9319	0.8499	0.9274	0.9393	0.7413	0.9654	1	0.8123	0.8873	0.8414	0.8808	0.9609	0.8791	0.9089	0.7758	0.8056	0.9448	0.9372	0.7764	0.8861	0.9261	0.6765	0.7065	0.8923	0.6307	0.8467	0.802	0.6509	0.6761	0.9323	0.9308	0.8907	0.7777	0.8627	0.9468	0.9312	0.8764	0.7324	0.7848
MAP7D1	1758	AA	15.1	14	15.2	0	1	0.1706	0.0241	0.129	0.1075	0.0838	0.1084	0.1114	0.1725	0.0941	0.0682	0.084	0.1325	0.1115	0.1045	0.1071	0.0808	0.0664	0.088	0.0894	0.1013	0.0835	0.1144	0.0968	0.0976	0.1189	0.0715	0.1361	0.0839	0.0624	0.0805	0.1172	0.0802	0.0779	0.0809	0.1348	0.0837	0.1048	0.083	0.117	0.0699	0.0873	0.0757
MAP7D1	1759	AA	11.1	10	11.2	0	0.9982	0.2355	0.0337	0.864	0.9262	0.8701	0.9272	0.9517	0.9346	0.8813	0.934	0.9063	0.9374	0.9185	0.9617	0.9195	0.8881	0.9341	0.9268	0.8893	0.9708	0.8783	0.9311	0.9225	0.958	0.9503	0.9392	0.9135	0.9232	0.9284	0.9627	0.901	0.9764	0.9051	0.941	0.9602	0.9589	0.9596	0.9665	0.9293	0.9323	0.9467	0.9238
MAP7D1	1760	RI	7.2	7.1	7.3	0	0.9891	0.6773	0.1319	0.6959	0.8035	0.366	0.5825	0.5852	0.8271	0.4761	0.55	0.5032	0.5074	0.5893	0.6212	0.6752	0.5893	0.6218	0.7879	0.6095	0.4959	0.6085	0.4177	0.5478	0.6725	0.9009	0.7132	0.8271	0.8196	0.5893	0.5103	0.8614	0.8442	0.5868	0.6375	0.5712	0.4746	0.626	0.6038	0.6801	0.7648	0.5295	0.7152
MAP7D1	1761	ES	6	5	7.1	0	1	0.4121	0.0664	0.7183	0.5698	0.5733	0.7573	0.8093	0.8263	0.7225	0.7777	0.7545	0.7785	0.7086	0.8288	0.8193	0.7011	0.8725	0.7215	0.7092	0.6566	0.713	0.8264	0.7903	0.816	0.7186	0.8129	0.7206	0.7303	0.7474	0.7669	0.7592	0.8337	0.7635	0.7466	0.7519	0.8205	0.668	0.8247	0.6808	0.7746	0.7612	0.8149
THRAP3	1762	ES	2	1	3	0	0.9745	0.3812	0.0464	0.0462	0.0909	0.0293	0.0467	0.0385	0.0513	0.0458	0.0994	0.0476	0.0566	0.0293	0.009	0.0237	0.0323	0.0415	0.0064	0.0741	0.1019	0.0597	0.0175	0.026	0.0602	0.0357	0.0741	0.0171	0.0379	0.0571	0.1071	0.1317	0.0123	0.0694	0.0258	0.0426	0.058	0.0805	0.0449	0.0102	0.0446	0.0964	0.0551
SH3D21	1765	AT	16.2			0	0.9927	0.8626	0.1633	0.5345	0.3408	0.3576	0.4111	0.5144	0.2004	0.5013	0.136	0.4615	0.5084	0.3062	0.4947	0.5561	0.4615	0.4232	0.2932	0.3042	0.4949	0.3095	0.3361	0.4631	0.3133	0.3725	0.1824	0.482	0.2101	0.5429	0.2297	0.1295	0.3719	0.5044	0.2975	0.4043	0.1863	0.3708	0.5296	0.3003	0.3304	0.2368	0.2335
SH3D21	1766	AT	19			0	0.9927	0.8626	0.1633	0.4655	0.6592	0.6424	0.5889	0.4856	0.7996	0.4987	0.864	0.5385	0.4916	0.6938	0.5053	0.4439	0.5385	0.5768	0.7068	0.6958	0.5051	0.6905	0.6639	0.5369	0.6867	0.6275	0.8176	0.518	0.7899	0.4571	0.7703	0.8705	0.6281	0.4956	0.7025	0.5957	0.8137	0.6292	0.4704	0.6997	0.6696	0.7632	0.7665
SH3D21	1767	ES	12:13:00	11	14	0	0.9855	0.5014	0.0622	0.9659	1	1	0.9491	0.9744	0.9491	0.9677	0.9248	1	0.9535	0.9646	1	0.9389	0.4986	1	1	1	0.9897	1	1	0.9315	1	0.9518	0.7828	1	0.9105	1	0.963	0.9295	0.8525	0.9672	0.9688	1	1	0.8985	0.9456	0.8803	0.8829	0.9283	1
SH3D21	1768	ES	07:08:00	6	9	0	0.9436	0.5268	0.0883	0.9207	1	1	1	0.9115	0.7712	0.8928	1	1	1	0.821	1	1	0.7972	1	1	1	1	1	0.9476	0.8895	0.8642	1	0.8822	0.8489	0.9446	1	0.8749	0.9763	1	1	0.9472	1	1	0.8171	0.8921	0.9157	0.7728	0.944	0.9451
SH3D21	1769	ES	5	4.2	6	0	0.9255	0.2748	0.0344	1	1	1	1	1	1	1	0.9033	1	1	1	1	1	1	1	1	1	1	1	1	1	1	1	1	1	0.9485	1	1	1	1	0.9667	0.9462	1	1	0.9451	1	1	1	1	1
STK40	1772	RI	11.2	11.1	11.3	0	1	0.2767	0.0354	0.0169	0.0338	0.0222	0.0313	0.0101	0.0991	0.0832	0.0181	0.0365	0.026	0.0389	0.0138	0.0764	0.0366	0.0364	0.0666	0.064	0.0404	0.028	0.0919	0.0661	0.0263	0.0919	0.0667	0.0469	0.0581	0.0887	0.0613	0.0292	0.0655	0.0364	0.0724	0.0493	0.0167	0.0696	0.0261	0.021	0.0222	0.0767	0.1339
STK40	1773	AA	4.1	3	4.2	0	0.9909	0.268	0.029	0.0165	0.0106	0	0.0397	0	0.0252	0	0.0089	0.0436	0	0	0.0214	0.0344	0.0214	0.0351	0.0291	0.0906	0.0351	0.0348	0	0.0566	0.0626	0.0403	0.0764	0.0168	0.0245	0.0575	0	0.0326	0	0.0156	0.0405	0.0272	0	0.0312	0.0277	0.016	0	0.043	0.015
STK40	1774	ES	2	1	3	0	0.9982	0.6975	0.1257	0.561	0.4271	0.5646	0.2675	0.5104	0.4312	0.5027	0.6133	0.5199	0.4782	0.2888	0.5492	0.4482	0.5786	0.5805	0.418	0.4823	0.5836	0.5101	0.7465	0.4545	0.7759	0.5827	0.5782	0.6272	0.572	0.4845	0.7452	0.5105	0.5225	0.4285	0.4367	0.4214	0.6286	0.4854	0.5575	0.5426	0.5432	0.56	0.5232
OSCP1	1775	AP	1			0	0.9873	0.15	0.014	1	0.9889	1	1	1	0.982	1	1	1	1	1	1	1	1	1	0.9971	1	1	1	1	1	1	1	1	1	1	1	1	1	1	1	1	1	1	1	1	1	1	0.9742	1
OSCP1	1776	AP	3			0	0.9873	0.15	0.014	0	0.0111	0	0	0	0.018	0	0	0	0	0	0	0	0	0	0.0029	0	0	0	0	0	0	0	0	0	0	0	0	0	0	0	0	0	0	0	0	0	0	0.0258	0
OSCP1	1777	AT	7			0	0.9945	0.8751	0.1569	0.2855	0.1579	0.4031	0.2142	0.3422	0.15	0.4586	0.7447	0.1923	0.2355	0.2639	0.1714	0.3338	0.2609	0.1724	0.2127	0.2288	0.2863	0.3462	0.2388	0.1375	0.6877	0.2709	0.364	0.2874	0.277	0.2302	0.1784	0.3392	0.2702	0	0.2339	0.3047	0.4571	0.1863	0.1192	0.15	0.3574	0.4339	0.3326
OSCP1	1778	AT	13.2			0	0.9945	0.8751	0.1569	0.7145	0.8421	0.5969	0.7858	0.6578	0.85	0.5414	0.2553	0.8077	0.7645	0.7361	0.8286	0.6662	0.7391	0.8276	0.7873	0.7712	0.7137	0.6538	0.7612	0.8625	0.3123	0.7291	0.636	0.7126	0.723	0.7698	0.8216	0.6608	0.7298	1	0.7661	0.6953	0.5429	0.8137	0.8808	0.85	0.6426	0.5661	0.6674
OSCP1	1779	ES	11.2:12:13.1	11.1	13.2	0	0.9964	0.0592	0.0029	1	1	1	1	1	1	1	1	1	1	1	1	1	1	1	1	1	1	1	1	1	1	1	1	1	1	1	1	1	1	1	1	1	1	1	1	1	1	1	1
OSCP1	1780	ES	2	1	4	0	0.8291	0.2317	0.0308	0	0	0	0.0609		0		0	0	0	0	0.0083	0.1991	0.0853	0	0.013	0	0			0	0	0		0.0963	0	0	0	0	0		0	0	0	0	0	0.0963	0	0	0
CSF3R	1786	RI	17.3	17.2	17.4	0	1	0.2651	0.0146	1	0.9961	1	0.9873	1	0.9957	1	1	1	1	0.9949	0.9921	0.9952	0.9467	1	0.995	0.9915	0.9825	0.9894	1	0.9944	1	0.9929	0.9864	1	1	0.9956	1	0.9712	0.9895	0.9327	0.9968	0.9879	0.9882	0.9887	1	1	0.9774	0.9932	1
CSF3R	1787	AA	17.1	16	17.2	0	0.8673	0.3779	0.0574	0.1189	0.1167	0.1295	0.1344	0.0824	0.1004	0.1037	0.0547	0.1152	0.0315	0.066	0.1201	0.1524	0.0943	0.0577	0.1085	0.1247	0.0649	0.1064	0.0711	0.0553	0	0.1077	0.1438		0.0943	0.1536	0.0742	0.2066	0.1504	0	0.0949	0.0895	0.1724	0.1023	0.1037	0.0692	0.0799	0.1169	0.1575
CSF3R	1788	ES	15	14	16	0	0.9818	0.0825	0.0036	1	1	1	1	1	1	1	1	1	1	1	1	1	1	1	1	1	1	1	1	1	1	1	1	1	1	0.997	1	1	1	1	0.9964	1	1	1	1	1	1	1	1
MEAF6	1792	AP	2.1			0	1	0.025	0.003	0.0011	0.0013	0.0046	0	0	0.0009	0.0072	0.0018	0.0085	0	0	0.0021	0.006	0.0107	0.0031	0.0015	0.0049	0	0.0022	0	0.0109	0.002	0.0031	0.002	0.001	0.0074	0	0.0035	0.0044	0.0069	0.0032	0.0026	0.0077	0.0034	0.0103	0.0027	0.0019	0.0028	0.009	0.0044
MEAF6	1793	AP	1			0	1	0.025	0.003	0.9989	0.9987	0.9954	1	1	0.9991	0.9928	0.9982	0.9915	1	1	0.9979	0.994	0.9893	0.9969	0.9985	0.9951	1	0.9978	1	0.9891	0.998	0.9969	0.998	0.999	0.9926	1	0.9965	0.9956	0.9931	0.9968	0.9974	0.9923	0.9966	0.9897	0.9973	0.998	0.9972	0.991	0.9956
MEAF6	1794	AT	8.2			0	1	0.0443	0.0034	0	0	0	0	0	0	0	0	0	0	0	0.0114	0	0	0	0	0	0	0	0	0	0	0	0	0	0	0	0.0098	0.0076	0.01	0	0.0121	0	0	0	0	0	0	0.0199	0.0087
MEAF6	1795	AT	9.2			0	1	0.0443	0.0034	1	1	1	1	1	1	1	1	1	1	1	0.9886	1	1	1	1	1	1	1	1	1	1	1	1	1	1	1	0.9902	0.9924	0.99	1	0.988	1	1	1	1	1	1	0.9801	0.9913
MEAF6	1799	ES	7:8.1:9.1	5	9.2	1	0.9345	0.3554	0.0673	0.8448	0.7969	0.8652	0.7837	0.9435	0.8339	0.6723	0.7058	0.7179	0.8926	0.7848	0.7741	0.6435		0.8164	0.7269	0.8022	0.8967	0.8463	0.7809	0.9281	0.8517	0.9034	0.7567	0.9189	0.9239	0.7527	0.8477	0.7674	0.7243	0.8676	0.8688	0.9167	0.8638	0.87	0.8574	0.8179			0.726
MEAF6	1801	ES	8.1:9.1	5	9.2	0	1	0.0854	0.0147	0.9595	0.9402	0.9861	0.9402	0.9799	0.9707	0.9767	0.9905	0.9773	0.99	0.9631	0.9565	0.9629	0.9945	0.9725	0.9412	0.9643	0.9918	0.9677	0.9625	0.9927	0.9828	0.9903	0.9597	0.9842	0.9819	0.9659	0.9853	0.9795	0.9702	0.9751	0.9751	0.9828	0.9822	0.9885	0.9691	0.9888	0.9949	0.9937	0.9645
MEAF6	1802	ES	6	5	7	1	0.8255	0.8853	0.056	0.0108	0		0.0221	0.0328	0.0474	0.0963		0.0765	0.0328	0.0301	0		0	0.0301	0	0.0279	0	0.1357	0	0	0.1298	0.0259	0	0.042	0	0	0.0259	0	0.0923	0	0	0	0.0378	0.0398	0.0259		0		0.1244
MEAF6	1803	ES	06:07:00	5	8.1	0	1	0.4994	0.0229	0.0024	0	0.0052	0.0055	0.0117	0.0074	0.0053	0	0.0049	0.0029	0.0045	0	0	0	0.0039	0	0.0043	0	0.0296	0	0	0.0153	0.0024	0	0.0078	0	0	0.0023	0	0.0087	0	0	0	0.0048	0.0033	0.0053	0	0	0	0.0134
MEAF6	1804	ES	7	5	8.1	1	0.9782	0.2986	0.0462	0.1918	0.2091	0.0875	0.1985	0.2688	0.1371	0.0479	0.0241	0.0584	0.0805	0.1279	0.143	0.0686	0.1009	0.1171	0.149	0.1398	0.0692	0.1622	0.1275	0.0903	0.0972	0.0871	0.1221	0.1616	0.1908	0.101	0.0802	0.069	0.0801	0.1509	0.154	0.1673	0.1083	0.0766	0.1706	0.051	0.1292	0.1483	0.0922
MEAF6	1805	ES	6	5	8.1	0	1	0.9483	0.0407	0.0017	0	0.0021	0.0048	0	0	0.0044	0	0	0.002	0.0035	0.0113	0	0.0144	0.0025	0.0063	0.0026	0	0	0	0	0	0.0019	0.0063	0	0	0	0.0019	0	0.008	0.0053	0	0	0.0046	0.0025	0	0	0	0.0163	0.0046
DNALI1	1806	ES	3	2	4	0	0.8927	0.6084	0.0659	1	0.9507	1	0.9723	0.8869	0.9804	1	1	1	1	0.7865	0.9499	0.9598	1	1	0.9789	0.9904	1	1	1	0.9446	1	0.9562	1		1	0.9585	1	1	1	1	1	1	0.7543	1	1	1	1	0.8268	1
C1orf109	1814	AP	3.1			0	0.9909	0.4717	0.0887	0.7049	0.9483	0.9405	0.6471	0.8274	0.6471	0.7444	0.7857	0.8293	0.7371	0.7947	0.8544	0.8105	0.8909	0.837	0.618	0.6311	0.7755	0.8302	0.8286	0.8257	0.8826	0.7073	0.6929	0.8705	0.9045	0.9362	0.9126	0.7755	0.7073	0.8512	0.6735	0.618	0.8497	0.7418	0.7877	0.8745	0.7674	0.7624	0.8652
C1orf109	1815	AP	1			0	0.9909	0.4717	0.0887	0.2951	0.0517	0.0595	0.3529	0.1726	0.3529	0.2556	0.2143	0.1707	0.2629	0.2053	0.1456	0.1895	0.1091	0.163	0.382	0.3689	0.2245	0.1698	0.1714	0.1743	0.1174	0.2927	0.3071	0.1295	0.0955	0.0638	0.0874	0.2245	0.2927	0.1488	0.3265	0.382	0.1503	0.2582	0.2123	0.1255	0.2326	0.2376	0.1348
C1orf109	1816	AA	6.1	5	6.2	0	0.9745	0.2864	0.0487	0	0.0715	0.1438	0	0	0	0.0392	0.0233	0.025	0	0	0	0.1119	0.0648	0.025	0.0593	0	0.0335	0	0.1273	0.0392	0.0691	0.0194	0.0648	0.1402	0.0762	0.0335	0.0754	0.061	0.0281	0.0319	0.0901	0.0593	0.0963	0.0488	0	0.0212	0.0392	0.0546	0.0472
C1orf109	1817	AD	4.3	4.2	5	0	0.9945	0.1171	0.02	1	0.9728	0.9647	1	1	1	1	1	0.9848	1	1	1	1	0.9795	1	0.9577	1	1	1	0.9666	1	0.9512	1	1	1	0.9531	0.9617	0.9692	0.9834	1	1	0.9837	1	1	0.9402	1	0.9669	1	1	1
C1orf109	1818	AA	4.1	3.3	4.2	1	0.8509	0.6595	0.1163	0.2438		0.2339	0	0.0808		0.2165	0.2249	0.1872	0.0692			0.2249	0.3672	0.2529	0.293		0.1824	0.097	0.3128	0.2872	0.2567	0.401	0.1214	0.1824	0.296	0.1214	0.2293	0.0746	0.2293	0.1555	0.2789	0.1214	0	0.1691	0.3259	0.2438	0.2438		0.1691
C1orf109	1819	ES	3.3:4.1	3.2	4.2	0	0.9	0.6109	0.1282	0.8862	1	0.9385			0.6069	0.7952	0.7508	1	0.5857	0.9253	0.8166	1	0.8766	0.763	0.7912	0.5015	0.7031	0.6332	1	0.8434	0.7386	0.827	0.7765	0.8618	0.7309		0.9389	0.5904	0.8691	0.8366	0.7633			0.7073	0.8702	1	0.7136	0.8727	0.8557
CDCA8	1821	RI	1.2	1.1	1.3	0	0.96	0.755	0.0964	0.8242		0.6392		0.7362		0.8054	0.6775	0.7527	0.7772	0.6598	1	0.7332	0.7532	0.6969	0.8106	0.8106	0.6733	0.8822	0.7483	0.7866	0.6743	0.8608	0.8771	0.8756	0.8033	0.8106	0.6948	0.7083	0.8332	0.7219	0.7527		0.6754	0.8642	0.6608	0.7117	0.7772	0.8027	0.7702
EPHA10	1825	AT	21			0	0.9945	0.3275	0.0577	0	0	0.175	0	0.1205	0	0	0	0	0	0	0.1544	0	0	0	0	0	0.0647	0	0.1705	0.1509	0.0667	0	0	0	0	0	0	0	0	0.2186	0	0	0	0	0	0	0	0.1621	0
EPHA10	1826	AT	3.2			0	0.9945	0.3275	0.0577	1	1	0.825	1	0.8795	1	1	1	1	1	1	0.8456	1	1	1	1	1	0.9353	1	0.8295	0.8491	0.9333	1	1	1	1	1	1	1	1	0.7814	1	1	1	1	1	1	1	0.8379	1
EPHA10	1828	RI	19.3	19.2	19.4	0	0.9	0.0358	0.0026	1	1	1	1	1	1	1	1	1	1	1	1	1	1	1	1	1	1	1	1	1	1	1	1		1	1	1	1	1	1	1	1		1	1	1	1	1	1
EPHA10	1829	RI	19.2:19.3	19.1	19.4	0	0.9	0.226	0.0107	1	1	1	1	1	1	1	1	1	1	1	1	1	1	1	1	1	1	1	1	1	1	1	1		1	1	1	1	1	1	1	1		1	1	1	1	1	1
MANEAL	1833	AP	1			0	0.9727	0.3753	0.027	1	1	1	1	1	1	1	1	1	1	1	1	1	1	1	1	0.9412	1	1	1	1	1	1	1	0.9284	1	1	1	1	1	1	1	1	1	0.965	1	1	1	1	1
MANEAL	1834	AP	2.1			0	0.9727	0.3753	0.027	0	0	0	0	0	0	0	0	0	0	0	0	0	0	0	0	0.0588	0	0	0	0	0	0	0	0.0716	0	0	0	0	0	0	0	0	0	0.035	0	0	0	0	0
MANEAL	1835	AA	4.1	3	4.2	0	0.9527	0.7904	0.119	0.6413	0.5625	0.8378	0.7714	0.8148	1	0.8383	0.7776	0.8916	0.7581	0.6805	0.5636		0.8246	0.9322	0.8069	0.7627	0.6845	0.826	0.7805	0.5011	0.6795	0.7431	0.8906	0.6721	0.7016	0.7834	0.5574	0.6283	0.8593	0.7581	0.8383	0.755	1	0.9181	0.3913	0.8526	0.8472	0.8089	0.7192
MANEAL	1836	ES	3	2.3	4.1	0	0.8145	0.3695	0.0661	0.9682	1	0.9024		1	1		0.9694	0.9248	1	0.7887	0.8696		1	1	0.8612	1	1	0.9555	1		0.9294		0.878	1		0.8193	0.9552	0.8864	0.8235	1	1	0.9251		1			1	1	1
C1orf122	1841	RI	1.2:1.3	1.1	1.4	0	0.9818	0.1486	0.0176	0.0182	0.1163	0	0.0082	0.025	0.0154	0	0	0.0403	0.0124	0.0329	0	0.0038	0	0.0112	0.0146	0.0387	0	0.0144	0	0.0202	0.0081	0.0127	0.0143	0.0148	0.0211	0.013	0.0095	0.003	0.0368	0.0443	0.0024	0	0.0068	0.0247	0.0033	0.0206	0	0	0.035
C1orf122	1842	AD	1.2	1.1	1.4	0	0.9818	0.1578	0.0242	0.0184	0	0	0.0116	0	0.0216	0.0609	0.0077	0	0.0174	0.0202	0.1533	0.0054	0	0.0095	0.1279	0.0538	0.0515	0.0068	0.0569	0.0203	0.0069	0.0349	0.02	0.0125	0.0231	0.0302	0.0326	0.0042	0	0.0813	0.0034	0	0.0096	0.0345	0.0229	0.0289	0	0.0339	0
INPP5B	1848	AT	7.3			0	1	0.2618	0.034	0.1051	0.0949	0.1252	0.08	0.0674	0.0954	0.0928	0.1291	0.1319	0.1357	0.1113	0.1013	0.1087	0.1168	0.0966	0.0835	0.0887	0.1322	0.1006	0.1679	0.1204	0.1566	0.1148	0.1245	0.1634	0.1726	0.1076	0.1346	0.1066	0.1251	0.1454	0.1496	0.0954	0.0647	0.169	0.126	0.1629	0.1524	0.1513	0.1201
INPP5B	1849	AT	24			0	1	0.2618	0.034	0.8949	0.9051	0.8748	0.92	0.9326	0.9046	0.9072	0.8709	0.8681	0.8643	0.8887	0.8987	0.8913	0.8832	0.9034	0.9165	0.9113	0.8678	0.8994	0.8321	0.8796	0.8434	0.8852	0.8755	0.8366	0.8274	0.8924	0.8654	0.8934	0.8749	0.8546	0.8504	0.9046	0.9353	0.831	0.874	0.8371	0.8476	0.8487	0.8799
INPP5B	1850	AA	16.1	15	16.2	0	0.9255	0.7056	0.1057	0.1224	0.1175	0.1704	0.1721	0.0666	0.1585	0.1462	0.3134	0.2305	0.1024	0.0967	0.243	0.05	0.2551	0.3887	0.112	0.1636	0.2551	0.0697	0.0967	0.3101	0.1965	0.2402	0.4612	0.3633	0.2085	0.1804	0.3134	0	0.1462	0.174	0.1024	0.2746	0.2246	0.2813	0.2551	0.1321	0.1462	0.2997	0.1557
INPP5B	1851	ES	13	12	14	0	0.9909	0.1558	0.0137	1	0.967	1	1	1	1	1	1	1	0.9178	1	1	1	1	1	0.987	1	1	1	1	1	1	1	1	1	0.9604	1	1	1	1	1	0.9882	1	1	0.9348	1	1	1	0.9522	1
INPP5B	1852	AD	7.2	7.1	8	0	0.8582	0.8738	0.228	1	0.2296	0.5048	0.4306	0.4913	0.5015	1	0.763	0.7469	0.5886	0.5603	0.5176		0.7285	0.6525	0.3971	0.6391	0.6032	0.4533	0.5176	0.6168		1	0.8111		0.5886	0.3764	1	0.4843	0.7285	0.7217	0.6742	0.4132	0.5376	0.547	0.556	1	0.7071	0.2945	0.6414
SF3A3	1853	ES	03:04:00	2	5	0	1	0.0697	0.0109	0.991	1	0.9894	0.9817	0.9945	1	0.9938	0.9888	0.9807	0.9753	0.9664	0.989	0.9822	0.9883	0.9844	0.9793	0.9838	0.979	0.9927	1	1	0.9856	0.9916	0.9789	0.9861	0.9819	0.9543	0.9951	0.9815	1	0.9844	0.9858	1	1	0.9901	0.9876	0.9824	0.9845	0.9888	0.9949
UTP11L	1854	ES	6	5	7	0	1	0.0448	0.0044	0.996	1	1	0.9908	1	1	1	1	1	0.9935	1	1	1	1	1	0.995	0.9926	0.9931	0.994	0.9939	0.992	0.9956	1	1	1	0.9956	0.995	1	0.9967	1	0.9963	0.9959	1	0.9911	1	0.9959	1	0.9939	0.9939	0.9944
GJA9	1857	AT	2.3			0	0.8745	0.4285	0.0916	0.0552	0.2203	0.3371				0.0407	0.2532	0.1691		0.0264	0.0328	0.0883	0.0581	0.0171	0	0.2835	0.1749	0.1128	0.2371	0.1623	0.1328	0.145	0.0954	0.0635	0.3195	0.1967	0.2892		0.0819	0.2049	0.1098			0.3553	0.1918	0.0607	0.0635	0.2203	0.0781
GJA9	1858	AT	7			0	0.8745	0.4285	0.0916	0.9448	0.7797	0.6629				0.9593	0.7468	0.8309		0.9736	0.9672	0.9117	0.9419	0.9829	1	0.7165	0.8251	0.8872	0.7629	0.8377	0.8672	0.855	0.9046	0.9365	0.6805	0.8033	0.7108		0.9181	0.7951	0.8902			0.6447	0.8082	0.9393	0.9365	0.7797	0.9219
RHBDL2	1859	AP	1			0	0.9982	0.9592	0.1934	0.8872	0.1176	0.6858	0.6141	0.7957	0.433	0.7064	0.7603	0.8286	0.6457	0.8875	0.6058	0.8209	0.8704	0.9047	0.617	0.6233	0.6723	0.5486	0.8585	0.6322	0.8556	0.5432	0.9032	0.6672	0.616	0.8456	0.6453	0.8659	0.8597	0.8677	0.5693	0.3424	0.6457	0.733	0.8902	0.8808	0.7717	0.7764	0.7242
RHBDL2	1860	AP	3			0	0.9982	0.9592	0.19	0.1128	0.8824	0.3142	0.3859	0.2043	0.567	0.2936	0.2397	0.1714	0.3543	0.1125	0.3942	0.1791	0.1296	0.0953	0.383	0.3767	0.3277	0.415	0.1415	0.3678	0.1359	0.4568	0.0968	0.3328	0.384	0.1544	0.3547	0.1341	0.1403	0.1323	0.4307	0.6576	0.3543	0.267	0.1098	0.1192	0.2283	0.2236	0.2758
RHBDL2	1861	AP	2			0	0.9982	0.4809	0.0277	0	0	0	0	0	0	0	0	0	0	0	0	0	0	0	0	0	0	0.0364	0	0	0.0085	0	0	0	0	0	0	0	0	0	0	0	0	0	0	0	0	0	0
RHBDL2	1862	AT	5.2			0	1	0.32	0.0333	0	0.1613	0	0	0	0	0.0232	0	0	0	0	0	0.0184	0	0	0.0443	0.0678	0	0	0.0313	0	0.0087	0.0424	0.0047	0	0	0	0	0.0149	0.0074	0.0497	0.1975	0	0	0.0214	0.0296	0.0219	0.0321	0	0.028
RHBDL2	1863	AT	10			0	1	0.32	0.0333	1	0.8387	1	1	1	1	0.9768	1	1	1	1	1	0.9816	1	1	0.9557	0.9322	1	1	0.9687	1	0.9913	0.9576	0.9953	1	1	1	1	0.9851	0.9926	0.9503	0.8025	1	1	0.9786	0.9704	0.9781	0.9679	1	0.972
AKIRIN1	1864	ES	3	2	4	0	1	0.1195	0.0105	0.9756	0.9857	0.9862	0.9927	0.9862	0.9881	0.9878	1	0.9881	0.9744	0.9923	0.9793	0.9819	1	1	0.9961	1	1	0.985	0.9765	0.9935	1	0.9937	1	0.9925	0.9957	1	0.9846	0.9747	0.988	0.9869	0.9886	0.9811	0.9804	0.9944	0.984	0.9905	1	1	0.9949
AKIRIN1	1866	ES	2	1	3	0	1	0.0207	0.0027	1	1	1	1	1	0.9911	1	1	0.9944	0.9909	1	1	1	1	0.9883	1	1	1	1	1	0.9918	1	1	1	0.9902	1	1	1	1	0.9913	1	1	0.9904	1	1	1	1	1	1	1
NDUFS5	1869	AD	1.2	1.1	2	0	1	0.6013	0.171	0.5608	0.5501	0.5048	0.5235	0.513	0.5198	0.5437	0.1498	0.0131	0.534	0.5524	0.5174	0.5524	0.5691	0.2983	0.2136	0.218	0.5169	0.2615	0.6048	0.254	0.5696	0.2935	0.2732	0.5344	0.5488	0.5385	0.5198	0.5516	0.5381	0.5685	0.5297	0.5204	0.5477	0.2558	0.5157	0.1836	0.5345	0.5411	0.2582
MACF1	1877	AT	109			0	1	0.0272	0.0021	0.9974	0.999	0.9949	0.9996	0.9991	0.9993	1	0.9955	0.9986	0.9983	0.9994	1	0.9992	0.9976	0.9994	0.9994	0.9993	0.9988	0.9996	0.9979	0.9987	0.9886	0.9978	0.9987	0.9985	0.9986	0.9957	0.9968	0.9961	1	0.9986	0.9997	0.9963	0.9985	0.9977	0.9978	0.9995	0.9995	0.9984	0.9998
MACF1	1879	AT	4			0	1	0.0272	0.0019	0	0.001	0.0051	0	0.0009	0.0003	0	0.0029	0	0.0009	0.0006	0	0.0008	0.0014	0.0006	0.0005	0.0001	0.0012	0.0004	0.0021	0.0013	0.0099	0.0013	0.0013	0.0009	0.0008	0.0011	0.001	0.0022	0	0.0014	0.0003	0.0013	0.0015	0.0014	0.0022	0.0005	0.0005	0	0.0002
MACF1	1880	AT	12.2			0	1	0.0095	0.0008	0.0026	0	0	0.0004	0	0.0004	0	0.0015	0.0014	0.0008	0	0	0	0.001	0	0.0001	0.0005	0	0	0	0	0.0015	0.0009	0	0.0006	0.0006	0.0032	0.0022	0.0016	0	0	0	0.0024	0	0.001	0	0	0	0.0016	0
MACF1	1881	ES	107	106	108	0	1	0.7871	0.1445	0.7293	0.297	0.6208	0.2966	0.2908	0.3736	0.6428	0.7187	0.2221	0.5504	0.282	0.2937	0.4841	0.6197	0.4888	0.2854	0.2899	0.7683	0.4555	0.392	0.3137	0.7283	0.571	0.5923	0.7327	0.6688	0.5215	0.6987	0.7034	0.5893	0.5864	0.6252	0.3953	0.5285	0.4792	0.3626	0.4436	0.6906	0.4505	0.5443
MACF1	1882	ES	105	104	106	0	1	0.0235	0.0027	0	0.0009	0	0.0008	0	0	0	0	0	0	0	0.0018	0.003	0	0.003	0	0	0	0.0032	0	0.006	0	0	0.0046	0	0	0	0	0	0	0	0	0.0094	0	0.0027	0	0	0	0	0.0027
MACF1	1883	ES	103	102	104	0	1	0.7691	0.1138	0.8763	0.586	0.7906	0.6965	0.4064	0.7718	0.8059	0.7948	0.3758	0.7395	0.6017	0.6263	0.6206	0.5699	0.753	0.6786	0.6643	0.898	0.4895	0.6875	0.5077	0.6802	0.6043	0.7204	0.8942	0.7768	0.742	0.8165	0.6939	0.7244	0.5767	0.7573	0.6163	0.7077	0.6295	0.5631	0.6085	0.8451	0.5873	0.6324
MACF1	1885	ES	77	76.1	79	0	0.9673	0.306	0.0442	0.9853	0.848	1	0.694	0.907	0.912	1	1	1	1	0.9634	0.8836	0.9543	1	1	0.9225	0.8928	1	0.9496	0.9196	0.9433	0.9718	0.9402	1	1	0.984	0.9461	1	0.9657	0.981	1	0.986	0.924	1	0.9889	1	1	1	0.9509	1
MACF1	1886	ES	69	68	70	0	0.9982	0.0978	0.0058	1	1	1	0.9969	1	1	1	1	1	1	1	0.9935	1	1	1	1	1	1	1	1	1	1	1	1	1	1	0.9874	1	1	1	1	1	1	1	1	1	1	1	1	1
MACF1	1887	ES	59	58	60	0	0.8855	0.6156	0.1315	1	0.6002	0.9598	0.4868	0.6024	0.5507	1	0.9668	1	0.9625	0.8535	0.42	1	0.9333	1	0.5276	0.5382	0.9479	0.7717	1	0.7953	1	0.5292	0.9058	1	0.9317	0.8535	0.9266	0.8651	0.9506	0.8807	0.8643	0.6794		0.7663	0.8771	0.9261	1	0.7744	1
MACF1	1888	ES	43.2:44:45:46:47	42	48	0	0.9255	1	0.2798	0.025	0.9541	0.0999	0.9117	0.6062	0.8111	0.0239	0	0.21	0.0661	0.5707	0.8604	0.2233	0.151	0.0923	0.8373	0.8842	0.0198	0.5032	0.0699	0.4599	0.1326	0.4912	0.1534	0.0192	0.1304	0.3617	0.0603	0.1882	0.3431	0.1023	0.2983	0.762	0.0371	0.5747	0.2154	0.0299	0.003	0.4141	0.3272
MACF1	1889	ES	29	28	30	0	0.8673	0.4723	0.0309	1	1	1	1	1	1	1	1	1	1	0.9409	0.9636	1	1	1	0.956	1	1	1	1	1	1	1	1	1	1	1	1	1	1	1	0.9775	1		1	1	0.9472	1	1	1
PABPC4	1893	ES	11	10.2	12	0	1	0.2944	0.0415	0.9627	0.8443	0.9637	0.9163	0.962	0.8891	0.8883	0.9022	0.872	0.9025	0.9512	0.9193	0.937	0.911	0.9347	0.9031	0.9539	0.9487	0.9098	0.9759	0.952	0.9459	0.8603	0.868	0.8598	0.9248	0.9336	0.9615	0.9313	0.8984	0.9612	0.9571	0.9085	0.8901	0.9638	0.9742	0.9391	0.9189	0.9473	0.9212
PABPC4	1894	ES	10.2:11	10.1	12	0	1	0.1559	0.0189	0.9763	0.9256	0.9756	0.9617	0.9819	0.9672	0.9695	0.9774	0.9669	0.9874	0.9818	0.9767	0.9872	0.9398	0.9793	0.9507	0.9515	0.9817	0.9847	0.9859	0.9715	0.9959	0.9781	0.9254	0.9805	0.975	0.9841	0.984	0.986	0.9668	0.9928	0.9861	0.9849	0.9332	0.9868	0.9956	0.9912	0.9764	0.9829	0.9797
PABPC4	1895	ES	11	10.1	12	0	1	0.551	0.0463	0.9337	0.8759	0.9584	0.9198	0.9672	0.9434	0.9137	0.9642	0.9282	0.9609	0.9471	0.9209	0.9758	0.9336	0.9468	0.8815	0.8727	0.9456	0.9692	0.9685	0.9451	0.9924	0.9435	0.8216	0.8904	0.9295	0.9597	0.9469	0.9754	0.9195	0.9846	0.9634	0.9723	0.8217	0.9657	0.9912	0.9581	0.9424	0.9546	0.9506
PABPC4	1896	AD	10.2	10.1	12	0	0.9927	0.5247	0.0833	0.6564	0.7301	0.6539	0.7387	0.7154	0.8093	0.8257	0.8457	0.8349	0.9085	0.7652	0.8244	0.8561	0.6467	0.7928	0.7104	0.5227	0.782	0.8828	0.6693	0.6726	0.9439	0.8942	0.6924	0.9089	0.7918	0.8388	0.7374	0.8602	0.7966	0.8645	0.7857	0.887	0.6749	0.7727	0.8718	0.9018	0.8098	0.7928	0.8285
PABPC4	1897	AD	10.2	10.1	11	0	1	0.3305	0.0537	0.7573	0.6545	0.6572	0.7039	0.6624	0.6553	0.7619	0.6367	0.7064	0.7763	0.7628	0.7927	0.6714	0.541	0.7378	0.7365	0.7502	0.7699	0.6868	0.7141	0.6787	0.6681	0.7408	0.7416	0.8705	0.7627	0.7358	0.7854	0.6554	0.7288	0.6905	0.7447	0.6655	0.7643	0.7415	0.6837	0.8421	0.7319	0.7505	0.7266
HEYL	1898	AP	1			0	0.8364	0.8362	0.1713	0.1638	0.7988	0.6839	0.8243	0.9028	0.7449	1	0.6771	0.7056	1	0.7219	0.5702	0.7294		0.7712	0.6493	0.8037	0.8274	0.7672	0.7056	0.618	1	0.692	1	0.7056	0.692	0.5345		0.5873	0.4182	0.7914	0.7497	0.775		0.6872	0.5873		0.4282	0.7957	0.7294
HEYL	1899	AP	2			0	0.8364	0.8362	0.1713	0.8362	0.2012	0.3161	0.1757	0.0972	0.2551	0	0.3229	0.2944	0	0.2781	0.4298	0.2706		0.2288	0.3507	0.1963	0.1726	0.2328	0.2944	0.382	0	0.308	0	0.2944	0.308	0.4655		0.4127	0.5818	0.2086	0.2503	0.225		0.3128	0.4127		0.5718	0.2043	0.2706
PPIE	1900	AT	9.2			0	1	0.0308	0.0047	0.001	0.0026	0.014	0.0092	0.0062	0.0064	0	0.0093	0.008	0.0018	0.0061	0.0058	0.0037	0	0.0022	0.007	0.0049	0.0094	0.0089	0.0054	0.0086	0.001	0.0104	0.0136	0.0067	0.0144	0.0121	0.0123	0.0075	0.0063	0.0078	0.0077	0.002	0.0019	0.0137	0.0024	0.0038	0.0053	0.0099	0.0177
PPIE	1901	AT	10			0	1	0.3369	0.0621	0.9172	0.7591	0.7883	0.7151	0.914	0.7069	0.9067	0.9127	0.892	0.8749	0.7156	0.8054	0.8253	0.9256	0.8406	0.6817	0.7059	0.9025	0.8281	0.8176	0.799	0.9475	0.8536	0.7156	0.8109	0.8552	0.7841	0.8655	0.8963	0.817	0.944	0.867	0.817	0.9288	0.813	0.8312	0.8204	0.8827	0.8998	0.8729
PPIE	1902	AT	12			0	1	0.3316	0.0609	0.0818	0.2383	0.1977	0.2757	0.0798	0.2867	0.0933	0.078	0.0999	0.1233	0.2783	0.1889	0.171	0.0744	0.1573	0.3113	0.2892	0.0881	0.163	0.177	0.1923	0.0515	0.1361	0.2708	0.1824	0.1304	0.2037	0.1222	0.0962	0.1767	0.0482	0.1253	0.181	0.0693	0.1733	0.1664	0.1758	0.112	0.0904	0.1094
PPIE	1903	ES	11	9.1	12	0	1	0.8031	0.1262	0.5489	0.6928	0.7978	0.6811	0.631	0.6636	0.58	0.575	0.7668	0.6971	0.6702	0.58	0.5768	0.5421	0.7548	0.5972	0.6566	0.7156	0.5484	0.6521	0.4853	0.7516	0.7594	0.7933	0.545	0.8155	0.6846	0.6055	0.5315	0.6971	0.3517	0.6779	0.7803	0.575	0.7342	0.6789	0.283	0.6709	0.7594	0.691
PPIE	1904	AD	7.2	7.1	8	0	1	0.5657	0.1014	0.0498	0.1669	0.4232	0.3004	0.0965	0.1877	0.2305	0.1025	0.0348	0.2654	0.2553	0.208	0.2881	0.0491	0.094	0.1466	0.1466	0.2742	0.0797	0.0515	0.0716	0.0505	0.1834	0.3525	0.0548	0.0887	0.4007	0.3946	0.1234	0.2726	0.0414	0.2959	0.218	0.1675	0.1007	0.1282	0.0346	0.0577	0.3155	0.2553
PPIE	1905	ES	7.1:7.2	6	8	0	1	0.9154	0.1791	1	0.8944	0.9566	0.9536	0.9084	1	1	1	0.4941	0.943	1	0.8732	1	0.7552	0.7715	0.8968	1	0.9612	1	0.647	0.8424	1	0.8871	1	0.7287	0.8394	1	0.9649	0.9053	0.9664	0.8448	1	0.9132	0.9163	0.6939	0.8498	0.7821	1	0.9532	0.9719
PPIE	1906	ES	7.1	6	8	0	1	0.0369	0.0067	1	0.99	0.9878	0.9905	0.9955	1	1	1	0.9848	0.9899	1	0.9841	1	0.9939	0.9864	0.9911	1	0.9936	1	0.9875	0.9947	1	0.9852	1	0.9907	0.9914	1	0.989	0.9934	0.9936	0.9965	1	0.9911	0.9935	0.9815	0.99	0.9955	1	0.9923	0.9958
PPIE	1907	AD	4.2	4.1	5	0	1	0.0885	0.0136	0.0289	0.0058	0.0249	0.0343	0.0029	0.0043	0	0.0138	0.0118	0.0282	0.0157	0.0162	0.0148	0.0041	0.0295	0.0245	0.0214	0.0623	0.0152	0.0148	0.0186	0.0346	0.0122	0.0233	0.0256	0.0646	0.0252	0.0393	0.0168	0.0355	0.0235	0.0224	0.0176	0.0188	0.0331	0.023	0.022	0.0346	0.0325	0.0185
PPIE	1909	ES	00:04:01.100000	2	6	0	1	0.0169	0.002	1	1	1	0.9924	1	1	1	1	1	1	1	1	1	1	1	1	1	1	1	1	1	1	1	1	1	1	0.9923	1	1	1	1	1	1	1	1	1	1	1	1	1
PPIE	1910	AD	1.2	1.1	2	0	1	0.4023	0.0598	0.7458	0.7361	0.8552	0.7746	0.7954	0.8442	0.8302	0.8452	0.8598	0.7557	0.7976	0.8754	0.792	0.8345	0.8642	0.7495	0.7541	0.7642	0.8832	0.7857	0.8325	0.82	0.8526	0.7037	0.7354	0.8367	0.7833	0.7831	0.7371	0.8391	0.8604	0.8243	0.8233	0.9313	0.7378	0.7598	0.8431	0.7807	0.8307	0.8585
BMP8B	1911	AT	6.2			0	1	0.6401	0.1344	0.1325	0.2073	0.0942	0.1897	0.1522	0.1305	0.0779	0.1593	0.3053	0.1818	0.2889	0.2983	0.1943	0.1495	0.2608	0.3511	0.5088	0.1902	0.0674	0.2295	0.2283	0.0387	0.2689	0.369	0.2495	0.2922	0.4127	0.2247	0.3693	0.3283	0.2004	0.1516	0.3506	0.5068	0.4503	0.5052	0.3764	0.0789	0.1181	0.2236
BMP8B	1912	AT	8			0	1	0.6401	0.1344	0.8675	0.7927	0.9058	0.8103	0.8478	0.8695	0.9221	0.8407	0.6947	0.8182	0.7111	0.7017	0.8057	0.8505	0.7392	0.6489	0.4912	0.8098	0.9326	0.7705	0.7717	0.9613	0.7311	0.631	0.7505	0.7078	0.5873	0.7753	0.6307	0.6717	0.7997	0.8484	0.6494	0.4932	0.5497	0.4948	0.6236	0.9211	0.8819	0.7764
TRIT1	1913	AT	12			0	1	0.0991	0.0146	0.9747	0.9903	0.9791	0.9847	0.9968	1	0.9961	0.9823	0.984	0.9907	0.988	0.9852	0.9826	0.9712	0.9852	0.9861	0.995	0.9688	0.9659	0.9764	0.9577	0.9951	0.9858	0.9836	0.987	0.9642	0.9721	0.9592	0.9867	0.9872	0.9691	0.9788	0.9883	0.9759	0.9009	0.9805	0.9662	0.9742	0.9324	0.9882
TRIT1	1914	AT	5			0	1	0.0991	0.0146	0.0253	0.0097	0.0209	0.0153	0.0032	0	0.0039	0.0177	0.016	0.0093	0.012	0.0148	0.0174	0.0288	0.0148	0.0139	0.005	0.0312	0.0341	0.0236	0.0423	0.0049	0.0142	0.0164	0.013	0.0358	0.0279	0.0408	0.0133	0.0128	0.0309	0.0212	0.0117	0.0241	0.0991	0.0195	0.0338	0.0258	0.0676	0.0118
TRIT1	1916	ES	10	9	11	0	1	0.0277	0.0027	1	1	0.9891	1	1	1	1	1	1	1	1	1	1	1	1	1	1	1	1	1	1	1	1	1	0.9876	1	1	1	1	1	1	1	1	1	1	1	1	1	1	1
TRIT1	1918	ES	9	8	10	0	1	0.0631	0.0086	0.9954	0.9788	1	1	0.9873	0.9705	0.9892	1	1	1	1	1	1	1	0.984	1	1	1	0.9905	1	0.9772	1	0.993	0.9815	1	0.9952	1	0.9617	0.9839	1	1	1	1	0.9895	1	1	1	1	1	0.9944
TRIT1	1920	ES	8	7.2	9	0	1	0.1563	0.0147	0.9796	1	0.9865	1	1	1	0.9895	0.9859	1	1	0.9868	1	0.9785	0.9855	1	1	1	1	1	1	1	1	1	1	0.9928	1	0.9787	0.978	1	0.987	1	1	1	0.9872	0.9858	1	0.9785	0.9311	1	0.9882
TRIT1	1921	AA	7.1	6.2	7.2	0	0.9927	0.1337	0.0225	0.9568	0.914	1	1	0.964	1	0.9818	1	0.9869	0.9815	1	1	1	1	1	1	1	0.9506	0.9817	1	1	0.9774	1	1	1	0.9862	1	1	1	1	0.982	0.9483	1	0.932	1	1	0.9555	0.9831	1	0.9705
TRIT1	1922	AD	6.2	6.1	7.1	0	0.9945	0.5111	0.0785	0.8762	0.7833	0.8229	0.8844	0.7992	0.9256	0.8114	0.8811	0.8684	0.9113	0.8271	0.7857	0.8115	0.8026	0.8361	0.9281	0.8777	0.6311	0.8916	0.8959	0.7416	0.7592	0.7973	0.7416	0.7968	0.6998	0.9451	0.7829	0.8777	0.8959	0.8957	0.9106	0.8026	0.7325	0.6887	0.8885	0.8512	0.7622	0.7994	0.8955
TRIT1	1923	ES	4	3.1	6.1	0	1	0.2643	0.0494	0.9331	0.9454	0.938	0.8943	0.9182	0.9147	0.948	0.8473	0.9428	0.88	0.8983	0.8857	1	0.8765	0.9391	0.9088	0.8426	0.9324	0.869	0.9329	0.9582	0.9554	0.9482	1	0.8827	0.9008	0.9303	0.893	0.9613	0.9342	0.9415	0.9202	0.8544	0.9133	0.8903	0.9095	0.8805	0.8788	0.903	0.9895
TRIT1	1924	ES	2:3.1:4:6.1:6.2	1	7.1	0	1	0.1631	0.0242	0.9771	1	1	1	0.9714	0.9586	0.9827	1	0.956	1	0.9728	1	1	1	1	0.9767	0.9126	0.9215	0.9688	1	1	0.9797	1	1	0.9844	0.9787	0.963	0.9857	0.9645	1	0.9618	1	1	0.9691	1	0.9665	1	0.9391	0.9712	1
TRIT1	1926	ES	2:3.1:6.1:6.2	1	7.1	0	0.9145	0.6667	0.1273	0.8276	1	1	1	0.8081	0.7494	0.8559	1	0.6531	1	0.8742	1		1	1	0.8851	0.7778	0.5561	0.8865	1	1	0.8129	1		0.931	0.882	0.7938	0.9321	0.7628	1	0.7424	1	1	0.8415	1	0.8221	1	0.7554	0.839	1
TRIT1	1928	ES	2:3.1:4:6.1	1	7.1	0	0.9836	0.7668	0.1266	0.8709	1	1	1	0.9127	0.684	0.9367	1	0.7978	1	0.8953	1	1	1	1	0.7838	0.6158	0.9035	0.818	1	1	0.9463	1	1	0.9484	0.9549	0.6472	0.9541	0.8426	1	0.7711	1	1	0.9219	1	0.8211	1	0.8548	0.9093	1
TRIT1	1932	ES	2:3.1:4:6.1:6.2:7.1:7.2:8:9	1	10	0	1	0.1274	0.0153	0.9932	1	0.9641	1	0.9763	1	1	0.9397	0.9731	1	0.9559	1	1	1	1	1	1	1	0.9856	1	1	1	1	0.9675	0.9872	0.9909	1	0.987	1	1	0.9887	0.971	1	0.9758	1	0.9864	1	1	1	1
TRIT1	1934	ES	2:3.1:6.1:6.2:7.1:7.2:8:9	1	10	0	0.9473	0.5619	0.0923	0.9448	1	0.7769	1	0.8423	1	1	0.86	0.767	1	0.8156	1		1	1	1	1	1	0.9465	1	1	1	1		0.9455	0.9488	1	0.9406	1	1	0.9121	0.8037	1	0.8789	1	0.9242	1	1	1	1
TRIT1	1936	ES	2:3.1:4:6.1:7.1:7.2:8:9	1	10	0	0.9836	0.5332	0.0743	0.9585	1	0.8731	1	0.927	1	1	0.697	0.8682	1	0.8386	1	1	1	1	1	1	1	0.9086	1	1	1	1	0.909	0.9575	0.9806	1	0.9582	1	1	0.9217	0.7859	1	0.9381	1	0.9202	1	1	1	1
TRIT1	1971	ES	00:02:03.100000	1	4	0	1	0.1669	0.0209	1	1	1	0.9612	0.9452	1	1	1	0.9879	1	0.894	1	1	1	1	1	0.86	1	1	0.9727	1	1	0.9729	1	0.9839	1	1	1	1	1	1	1	1	1	1	0.9815	1	0.9838	0.9732	1
TRIT1	1972	ES	00:03:01.100000	1	6.1	0	1	0.1721	0.0286	0.9604	0.967	0.9655	0.9314	1	0.9557	0.9851	1	0.9591	0.9267	0.9478	0.9707	0.9419	1	1	0.9769	0.9574	1	0.9718	0.9411	0.9777	1	1	0.9693	0.973	0.9919	1	0.9522	0.9671	0.9808	0.9765	1	0.9632	1	0.9613	0.9837	0.9709	0.9743	0.975	0.9898
TRIT1	1974	ES	00:02:03.100000	1	6.1	0	0.8982	0.8017	0.1395	0.7274	0.7328	0.7748	0.7125	1	0.7261	0.8705	1	0.6635	0.7422	0.769	0.8473		1	1	0.8837	0.8805	1	0.8954	0.6642	0.755	1	1		0.8815	0.9504	1	0.7931	0.7711	0.8613	0.8244	1	0.8382	1	0.8372	0.9033	0.8768	0.8792	0.8533
MYCL	1975	AT	2			0	1	0.5534	0.0792	0.7574	0.7796	0.8223	0.9201	0.9263	0.9692	0.9315	0.6878	0.8719	0.8471	0.9703	0.9178	0.9193	0.963	0.9636	0.9327	0.9517	0.9457	0.8395	0.9477	0.9505	0.7744	0.8774	0.878	0.9389	0.9021	0.9249	0.8461	0.9437	0.9181	0.9471	0.8925	0.9272	0.841	0.8965	0.8979	0.8862	0.9008	0.8203	0.8664
MYCL	1976	AT	1.4			0	1	0.5534	0.0792	0.2426	0.2204	0.1777	0.0799	0.0737	0.0308	0.0685	0.3122	0.1281	0.1529	0.0297	0.0822	0.0807	0.037	0.0364	0.0673	0.0483	0.0543	0.1605	0.0523	0.0495	0.2256	0.1226	0.122	0.0611	0.0979	0.0751	0.1539	0.0563	0.0819	0.0529	0.1075	0.0728	0.159	0.1035	0.1021	0.1138	0.0992	0.1797	0.1336
MYCL	1977	RI	1.2	1.1	1.3	0	0.8891	0.8321	0.167	0.5322		0.6856	0.3487	0.6913		0.5768	0.609	0.6491	0.6644	0.6894	1	1	0.4576	0.6856	0.6233	0.4576	0.2944	0.5199	0.4725	0.5108	0.3514	0.7791	0.5388	0.5948	0.7286	0.7872	0.5489	0.778	0.7872	0.6329	0.6003	0.3687	0.7168	1	0.6417	0.3046	0.7155	0.5522	0.5569
MFSD2A	1978	AA	3.1	2	3.2	0	0.92	0.2573	0.0226	0	0.0056	0.0104	0.0229	0	0.0133	0.0335	0	0	0	0	0.0189	0	0.0292	0.0415	0.0042	0.0116	0.026	0.0281	0	0.0118		0.0134	0	0	0.0281	0.0104	0.0392	0.0152	0.0901	0	0.015	0.0184	0.0241	0.0415	0	0	0.0084	0	0
MFSD2A	1980	ES	00:02:03.200000	1	4	0	0.9964	0.1154	0.009	1	1	0.9933	1	1	0.9976	1	1	1	1	1	1	1	1	1	0.9972	1	1	0.9907	0.9848	0.9906	1	0.9948	1	1	0.9893	1	1	1	1	1	1	1	0.9835	1	1	0.9885	1	0.9745	1
CAP1	1981	AA	3.1	2.2	3.2	0	1	0.1511	0.0194	0.9178	0.9304	0.9234	0.8974	0.911	0.9033	0.9044	0.8976	0.9295	0.9365	0.9223	0.9118	0.9116	0.9271	0.9116	0.9055	0.8972	0.9289	0.8927	0.9117	0.9037	0.9314	0.9152	0.873	0.8969	0.911	0.9094	0.9283	0.9452	0.9285	0.8943	0.9044	0.9237	0.9177	0.8978	0.9235	0.9297	0.8679	0.9149	0.9239
CAP1	1982	AA	2.1	1.2	2.2	0	1	0.3084	0.0353	0.3223	0.2559	0.2222	0.2646	0.2714	0.2631	0.3165	0.2604	0.2975	0.298	0.2087	0.2838	0.2157	0.3017	0.2346	0.2884	0.2885	0.2516	0.3095	0.2586	0.2826	0.2598	0.2781	0.23	0.2293	0.246	0.247	0.2529	0.2754	0.3153	0.2153	0.2125	0.2084	0.2401	0.2666	0.2579	0.2661	0.3125	0.2229	0.2615
CAP1	1983	AD	1.2	1.1	2.1	0	0.9982	0.4819	0.0606	0.7138	0.7027	0.6821	0.7024	0.7327	0.6956	0.7858	0.666	0.7219	0.6673	0.6068	0.7623	0.7713	0.7606	0.6775	0.6906	0.7651	0.7421	0.7306	0.6778	0.6482	0.7708	0.7944	0.7181	0.6411	0.7938	0.7308	0.6237	0.6403	0.786	0.7298	0.7335	0.6956	0.7321	0.6809	0.7131	0.8322	0.7336	0.6944	0.5692
CAP1	1984	ES	1.2:2.1	1.1	2.2	0	1	0.4458	0.0638	0.447	0.5005	0.5817	0.4902	0.5099	0.494	0.5687	0.4447	0.6398	0.5314	0.4569	0.524	0.4696	0.5315	0.431	0.5101	0.5386	0.526	0.5187	0.4329	0.5678	0.5733	0.5362	0.3824	0.6516	0.4984	0.4912	0.4916	0.4682	0.641	0.4669	0.4379	0.449	0.5491	0.4928	0.4678	0.4811	0.5576	0.4801	0.4199
CAP1	1985	AA	2.1	1.1	2.2	0	0.9964	0.4292	0.0578	0.2438	0.2965	0.392	0.2883	0.274	0.2982	0.2633	0.2854	0.4049	0.3599	0.3515	0.2545	0.2069	0.2621	0.2639	0.3169	0.2627	0.2772	0.2832	0.2652	0.4149	0.2843	0.2293	0.1947	0.5101	0.2042	0.2612	0.3672	0.3296	0.3259	0.2438	0.2197	0.2618	0.3071	0.3116	0.2602	0.1568	0.3128	0.2878	0.3526
CAP1	1986	AD	1.2	1.1	2.2	0	1	0.4342	0.0436	0.6283	0.7434	0.8288	0.7266	0.7353	0.7311	0.739	0.6935	0.8066	0.7265	0.7603	0.7342	0.762	0.7231	0.7108	0.7186	0.7412	0.7665	0.7051	0.6852	0.7683	0.792	0.749	0.6733	0.8621	0.7517	0.7453	0.7397	0.6972	0.7941	0.7604	0.7417	0.7548	0.7931	0.7266	0.7154	0.7177	0.7339	0.762	0.6703
PPT1	1987	AP	1			0	1	0.0369	0.0035	0.9937	1	1	1	1	1	1	1	1	1	1	1	1	1	1	1	1	0.9882	1	1	1	1	0.9885	1	1	1	1	1	1	1	1	1	1	1	1	1	1	1	1	1
PPT1	1988	AP	6			0	1	0.0369	0.0035	0.0063	0	0	0	0	0	0	0	0	0	0	0	0	0	0	0	0	0.0118	0	0	0	0	0.0115	0	0	0	0	0	0	0	0	0	0	0	0	0	0	0	0	0
PPT1	1991	RI	10.2	10.1	10.3	0	1	0.0064	0.0005	1	1	1	1	1	1	1	0.9987	1	1	1	1	1	1	1	1	1	1	1	1	1	1	1	1	1	0.999	1	1	1	1	1	1	1	1	1	1	1	1	1	1
PPT1	1992	ES	9	8	10.1	1	0.8382	0.0459	0.0092		0.9703	0.9755	0.9677	0.975	0.9613	0.9723	0.9639		0.9809	0.9539	0.9721	0.9577	0.96		0.9795	0.9549	0.9706	0.9708	0.9785	0.963		0.9733	0.9786		0.9654	0.964	0.9705	0.9562	0.9703	0.9809	0.9696	0.9654	0.961	0.9749	0.9801		0.9676		0.9671
PPT1	1993	AA	5.1	4	5.2	0	1	0.0129	0.0015	0	0	0.0022	0.0016	0	0	0	0	0.0074	0.0016	0.0016	0	0	0.0042	0	0.0018	0	0	0.0018	0.0026	0	0	0	0	0	0.0009	0	0.001	0	0	0.0012	0	0	0	0.0046	0.0013	0	0	0.0042	0
PPT1	1995	ES	02:03:04	1	5.2	0	1	0.0068	0.001	1	1	1	1	0.9964	1	1	1	1	1	1	1	1	1	1	0.9989	1	0.9966	1	0.9966	1	1	0.9967	1	1	1	1	1	1	1	1	1	1	1	1	1	1	1	0.9973	1
SMAP2	1996	AP	3			0	1	0.0622	0.0084	0	0.0102	0	0	0.0132	0.0197	0	0	0.0169	0	0.0103	0.0113	0	0	0	0	0	0.0234	0.0078	0	0	0	0	0	0	0	0	0	0	0.0201	0	0	0.0186	0	0	0	0	0	0	0
SMAP2	1997	AP	1			0	1	0.3042	0.0386	1	0.9703	0.9849	0.9092	0.9743	0.9335	0.8862	0.9766	0.9669	1	0.9456	0.9457	1	1	0.9639	0.9459	0.9422	0.9766	0.9773	0.8644	1	1	0.8866	0.8834	1	0.9543	1	0.9841	1	0.9417	0.9842	0.9865	0.9284	0.9279	1	0.9712	0.91	0.9479	0.9701	0.9839
SMAP2	1998	AP	2			0	1	0.3042	0.0379	0	0.0195	0.0151	0.0908	0.0125	0.0468	0.1138	0.0234	0.0161	0	0.0441	0.043	0	0	0.0361	0.0541	0.0578	0	0.0149	0.1356	0	0	0.1134	0.1166	0	0.0457	0	0.0159	0	0.0382	0.0158	0.0135	0.0531	0.0721	0	0.0288	0.09	0.0521	0.0299	0.0161
ZFP69	2001	AA	2.1	1	2.2	0	0.9818	0.6298	0.1063	0.9427	1	0.9435	0.9114	0.9165	1	1	0.9251	0.7977	0.8797	1	0.8829	1	0.8991	1	1	1	1	0.8991	1	0.9114	1	1	0.8916	1	1	0.8128	0.8511	1	0.9224	0.7921	0.8968	1	0.8341	1	0.5333	1	1	1	0.9132
EXO5	2002	RI	1.4	1.3	1.5	0	0.76	1	0.1625	0.22		0.4037	0.3449	0.1529				0.3299	0.4482	0.2438			0.3757	0	0.5129	0.1192	0.2789	0.2401			0.4362	0.3513	0.5752	0.1621	0.4293	0.311	0.4125			0.1308	0.3403		0.7596	0.3963	0.3872	0.2653	0.1621	0.4037	0.3757
EXO5	2003	RI	1.2	1.1	1.3	0	0.9564	0.7694	0.1803	0.8274	0.5711	1	0.6663	0.769	0.7056	0.8099	0.6508	0.9281	0.835	1	1	1	1		1	0.7616	0.7824	0.6805	1	1	1	1	1	1	1	1	0.917	0.5451	1	1	0.5158	0.727	0.8274	1	0.6663	0.8596	0.8233	0.7167	1
EXO5	2006	AD	1.2:1.3	1.1	1.5	0	0.9727	0.6547	0.0922	1	0.7074	0.91	1	1	1	1	1	0.9262	1	0.8769	1	0.7765	1	1	1	1	1	1	1	1	1	1	1	1	1	1	1	1	1	1	1		1	0.909	1	0.8507	1	0.722	1
ZNF684	2008	AT	5.2			0	1	0.6299	0.1131	0.4178	0.5	0.3426	0.4367	0.2687	0.4096	0.3241	0.458	0.3969	0.491	0.3984	0.4308	0.4686	0.4179	0.3238	0.3937	0.3918	0.4353	0.4526	0.3553	0.4496	0.3719	0.3534	0.3585	0.5121	0.5775	0.3522	0.5421	0.507	0.3453	0.386	0.4329	0.2544	0.2884	0.4597	0.3886	0.4227	0.4805	0.4423	0.4329
ZNF684	2009	AT	6			0	1	0.6299	0.1131	0.5822	0.5	0.6574	0.5633	0.7313	0.5904	0.6759	0.542	0.6031	0.509	0.6016	0.5692	0.5314	0.5821	0.6762	0.6063	0.6082	0.5647	0.5474	0.6447	0.5504	0.6281	0.6466	0.6415	0.4879	0.4225	0.6478	0.4579	0.493	0.6547	0.614	0.5671	0.7456	0.7116	0.5403	0.6114	0.5773	0.5195	0.5577	0.5671
NFYC	2012	AP	10			0	1	0.1073	0.0129	0.0104	0.0122	0.0105	0.0021	0.0258	0.0251	0.0237	0.014	0.0171	0.0063	0.0154	0.019	0.0184	0.0085	0.0265	0.008	0.013	0.0898	0.0185	0.0231	0.0185	0.0135	0.0174	0.0304	0.038	0.0377	0.0175	0.0276	0.018	0.0263	0.0061	0.0082	0.0159	0.0184	0.013	0.0085	0.0058	0.0059	0.0133	0.0401
NFYC	2013	AP	1			0	1	0.2662	0.0494	0.8323	0.8916	0.9446	0.8369	0.9426	0.8636	0.9181	0.9712	0.926	0.9476	0.8911	0.8685	0.9551	0.9353	0.9473	0.8934	0.811	0.8525	0.9367	0.8728	0.814	0.8976	0.8904	0.8308	0.7641	0.9095	0.9275	0.8924	0.9645	0.8235	0.877	0.9357	0.846	0.9118	0.8956	0.9166	0.8982	0.9244	0.9342	0.8626
NFYC	2014	AP	2			0	1	0.0604	0.0065	0.0048	0	0.0093	0.0043	0	0.0058	0	0	0.0029	0	0.0071	0.0056	0.0048	0.0117	0.0065	0.0024	0.0034	0.0114	0.0255	0.004	0.0109	0.004	0.0072	0.0224	0.0044	0	0.0136	0.0057	0.014	0	0.023	0.017	0.0165	0	0.0067	0.0066	0.0282	0.0081	0	0.0039
NFYC	2015	AP	4			0	1	0.2425	0.0454	0.1526	0.0962	0.0356	0.1567	0.0316	0.1056	0.0582	0.0148	0.054	0.0461	0.0864	0.1069	0.0218	0.0446	0.0197	0.0962	0.1726	0.0463	0.0194	0.1001	0.1566	0.085	0.0851	0.1164	0.1935	0.0528	0.0414	0.0742	0.0036	0.1502	0.094	0.039	0.1216	0.0698	0.0847	0.0684	0.0677	0.0616	0.0525	0.0934
NFYC	2017	AA	20.1:20.2	19	20.3	0	1	0.3015	0.0442	0.9432	0.9806	0.9252	0.9615	0.9802	1	0.8862	0.7695	0.947	0.9471	0.9132	0.9049	0.9776	1	0.9012	0.9591	0.9634	0.9455	0.967	0.9003	0.8928	0.9482	0.9106	0.9057	0.9575	0.9265	0.9425	0.9414	0.8831	0.8529	0.9355	0.9038	0.9746	0.9086	0.9649	0.9231	0.9591	0.9302	0.9628	0.9157
NFYC	2018	AA	20.2	19	20.3	0	1	0.1583	0.0236	0.9825	0.9828	0.9785	0.9581	0.9828	1	0.8896	0.9075	0.9682	0.9635	0.9522	0.9386	0.9885	1	0.9565	0.973	0.9751	0.9644	0.9782	0.9393	0.9423	0.9621	0.9446	0.9427	0.9536	0.9457	0.949	0.9634	0.9559	0.8922	0.9603	0.9253	0.9822	0.9631	0.9768	0.9715	0.9687	0.9752	0.9765	0.9375
NFYC	2019	AA	20.1	19	20.2	0	1	0.4607	0.0698	0.2238	0.4628	0.2096	0.5152	0.4584	0.4754	0.485	0.249	0.3634	0.3976	0.3398	0.3778	0.3308	0.4006	0.2876	0.3883	0.3956	0.3845	0.388	0.3624	0.332	0.4124	0.3679	0.3628	0.5167	0.4138	0.4615	0.3732	0.2536	0.4058	0.3688	0.425	0.4045	0.2705	0.3892	0.2555	0.425	0.2481	0.3774	0.4139
NFYC	2020	ES	18	17	19	0	1	0.2942	0.0436	0.0883	0.1059	0.1265	0.1613	0.158	0.0697	0.1193	0.2064	0.0871	0.1398	0.0787	0.1425	0.1151	0.1224	0.0534	0.0897	0.0679	0.1652	0.1022	0.0946	0.1046	0.1947	0.2341	0.0845	0.1131	0.3256	0.2064	0.1861	0.0845	0.126	0.1434	0.1144	0.0613	0.2031	0.1224	0.0507	0.0473	0.1564	0.1247	0.177
NFYC	2021	AA	16.1	15	16.2	0	1	0.0292	0.0043	1	1	0.993	0.9944	1	1	1	0.9924	0.9965	0.9947	1	1	1	1	0.9899	0.9937	1	0.9922	1	1	0.9961	0.9961	0.9967	1	1	1	0.9942	1	0.9952	1	0.9959	1	0.9803	1	1	1	1	1	1	1
NFYC	2022	ES	13	12	14	0	1	0.0228	0.0038	1	1	1	0.993	1	1	1	1	0.9957	1	1	1	0.993	0.9852	1	1	1	1	1	1	1	1	1	1	1	1	1	0.9862	1	1	0.9954	1	1	1	1	1	1	1	1	0.9932
NFYC	2023	ES	6	1	11	0	1	0.2525	0.0402	0	0	0	0.0511	0.1603	0	0.0334	0.0293	0.0237	0	0.049	0.0318	0	0.0841	0.0464	0.0307	0.0543	0	0.1235	0	0.0982	0.0952	0.1354	0.0451	0.1157	0.071	0.038	0.0426	0.103	0.03	0.0389	0.0432	0	0.0402	0.042	0.0372	0	0.0997	0.1336	0
CTPS1	2025	AP	2			0	1	0.2275	0.0245	0	0	0	0	0	0	0	0	0	0	0	0	0.0642	0	0	0	0.125	0	0	0	0	0	0	0.0967	0.0973	0	0.0564	0	0	0.0433	0	0	0	0	0	0	0	0	0	0
CTPS1	2026	AP	1			0	1	0.2696	0.0442	1	1	1	1	1	1	0.9567	1	0.98	1	0.9578	1	0.9358	1	0.8981	1	0.875	1	1	0.951	0.9544	1	1	0.842	0.9027	0.9841	0.9078	1	1	0.9018	1	0.9787	1	0.9209	0.9691	1	0.9666	1	1	0.9426
CTPS1	2027	AP	3.1			0	1	0.2076	0.0359	0	0	0	0	0	0	0.0433	0	0.02	0	0.0422	0	0	0	0.1019	0	0	0	0	0.049	0.0456	0	0	0.0613	0	0.0159	0.0358	0	0	0.0549	0	0.0213	0	0.0791	0.0309	0	0.0334	0	0	0.0574
CTPS1	2028	AT	9.2			0	1	0.0566	0.0095	0.0279	0.027	0.0115	0.0126	0.006	0.0146	0.011	0.0258	0.0034	0.019	0.0119	0.0174	0.0119	0.0085	0.003	0.0195	0.0169	0.0337	0.0163	0	0.0236	0.0137	0.0144	0.0168	0.0039	0.0122	0.0454	0.0122	0.0162	0.0146	0.0074	0.0245	0.0181	0.0152	0.02	0.0174	0.0246	0.0106	0.0176	0.0189
CTPS1	2029	AT	20			0	1	0.0566	0.0095	0.9721	0.973	0.9885	0.9874	0.994	0.9854	0.989	0.9742	0.9966	0.981	0.9881	0.9826	0.9881	0.9915	0.997	0.9805	0.9831	0.9663	0.9837	1	0.9764	0.9863	0.9856	0.9832	0.9961	0.9878	0.9546	0.9878	0.9838	0.9854	0.9926	0.9755	0.9819	0.9848	0.98	0.9826	0.9754	0.9894	0.9824	0.9811
CTPS1	2030	ES	3.2:4:5:6	1	7	0	1	0.0212	0.0011	1	1	1	1	1	1	1	1	1	1	1	1	1	1	1	1	1	1	1	1	1	1	1	1	1	1	1	1	1	1	1	1	1	1	1	1	1	1	1	1
SCMH1	2041	AP	1			0	0.9327	0.7748	0.1224	0.9173	0.972	0.9737	0.9615	0.978	0.9204	0.9615	0.9105	0.8666	0.8063	0.7923	0.8285	1	0.9749	0.8961	0.8818	0.909	0.6614	0.9024	0.8732	0.9083	0.8375	0.9475	0.786	0.951	0.8328	0.8063	0.836	0.8332	0.5607	0.8736	0.876	1	0.2733	0.4867	0.8807	0.7597	0.7995	0.7614	0.5726
SCMH1	2042	AP	4.1			0	0.9327	0.2998	0.0474	0	0	0	0	0	0	0	0	0.0475	0	0	0.0649	0	0	0.0393	0.0358	0	0.0605	0	0.0638	0	0	0	0.1078	0	0.0338	0	0.0262	0	0.1025	0.0319	0	0	0.2998	0.1186	0.0201	0.0521	0.0675	0.1139	0.1178
SCMH1	2046	AP	3			0	0.9327	0.5976	0.1048	0.0827	0.028	0.0263	0.0385	0.022	0.0796	0.0385	0.0895	0.0859	0.1937	0.2077	0.1066	0	0.0251	0.0646	0.0824	0.091	0.2781	0.0976	0.0629	0.0917	0.1625	0.0525	0.1062	0.049	0.1334	0.1937	0.1378	0.1668	0.3368	0.0945	0.124	0	0.4269	0.3947	0.0992	0.1882	0.133	0.1247	0.3096
SCMH1	2047	ES	17	16	18	0	0.9982	0.7333	0.102	0.5473	0.72	0.6928	0.7742	0.595	0.7974	0.6038	0.4936	0.5012	0.7822	0.5149	0.6557	0.5962	0.4444	0.6277	0.6617	0.5977	0.6693	0.7237	0.5281	0.5658	0.6847	0.8148	0.7879	0.7083	0.5867	0.6702	0.6177	0.5882	0.5455	0.3429	0.5679	0.7407	0.595	0.5763	0.5499	0.4592	0.5673	0.5625	0.565
SCMH1	2048	ES	10:11:00	9	12	0	1	0.1809	0.0171	1	1	0.9636	1	0.9665	1	0.953	1	1	0.9774	1	0.9793	1	1	0.9775	1	1	0.985	1	1	1	1	1	1	1	1	1	1	1	1	0.9773	1	1	1	0.9824	1	0.9816	1	1	0.9777
SCMH1	2049	ES	07:08:00	6	9	0	0.9909	0.5058	0.088	0.8448	0.9664	0.9312	1	0.6755	0.9587	1	1	0.9106	1	0.9047	0.9141	1	0.8989	0.8491	0.9305	0.8373	0.8965	1	0.9106	0.9507	0.9321	0.9486	1	0.8618	0.824	0.9211	0.9699	0.8427	0.8761	0.8762	0.9303	1	0.8449	0.8781	0.9069	0.8481	0.9274	0.871	0.8243
SCMH1	2051	ES	7	6	8	0	0.98	0.6714	0.1073	0.8696	0.7614	0.8763	0.8101	0.6557	0.8511	1	0.9283	0.9369	1	0.8108	0.6263	1	0.7835	0.8355	0.7496	0.5828	0.625	0.8205	0.6769	0.8452	0.9263	0.8355	0.917	1	0.8452	0.5511	0.8772	0.8205	0.8205	0.8421	0.8489	0.5435	1	0.9594	0.8662	0.9369	1	1	0.7529
SCMH1	2053	ES	06:07:08	5	9	0	0.9909	0.8269	0.1211	1	0.8607	0.9096	0.8421	0.5598	0.9128	0.5628	0.8644	0.7695	0.7845	0.7073	0.6207	0.9135	0.5704	0.93	0.8783	0.9132	0.8003	0.7537	0.7423	0.9371	0.9305	0.6872	0.8458	0.7668	0.6767	1	0.8243	0.8139	0.8385	0.948	0.8035	0.7073	1	0.8615	0.8468	0.8318	0.6976	0.6901	0.7466
SCMH1	2054	ES	06:08:00	5	9	0	0.8309	1	0.2065	1	0.7317	0.8052	0.6698	0.4897	0.8222		0.5368	0.3925		0.5225	0.5405		0.4641	0.8179	0.8317	0.9471	0.8342	0.4906	0.7543	0.9052	0.6294	0.4057	0.5667		0.4218	1	0.4813	0.7526	0.7981	0.8908	0.5151	0.8278		0.3256	0.5817	0.3386			0.6087
SCMH1	2055	ES	8	5	9	0	0.76	0.8502	0.1665		0.7808	0.6812	0.736	0.632	0.8649			0.6195	0.6131	0.5815	0.5352		0.5288	0.8877	0.6927	0.8944	0.5802	0.6271	0.5323	0.83		0.3737	0.6709		0.5307		0.545	0.8254			0.5418	0.7149	1	0.7159	0.6422	0.608	0.3636	0.5792	0.3823
SCMH1	2057	ES	06:07:00	5	8	0	0.9855	0.7031	0.1423	0.8694	0.6562	0.8464	0.6697	0.4444	0.6681	0.8077	0.9196	0.7332	0.7253	0.6415	0.6324	0.902	0.5951	0.6373	0.7925	0.5773	0.7766	0.6746	0.7291	0.7756	0.8651	0.8003	0.7638	0.8551	0.661	0.7384	0.8123	0.5041	0.8077	0.8598	0.8161	0.4957	0.5595	0.7204	0.7647	0.7736	0.8337	0.7541	0.8441
SCMH1	2058	ES	6	5	8	0	0.8055	1	0.201	0.7248	0.4515	0.6868	0.4316	0.3721	0.4593			0.3331		0.4445	0.5424		0.4788	0.3679	0.7154	0.6933	0.8068	0.3874	0.7379	0.6834		0.5483	0.4255		0.4	0.7652	0.455	0.4088	0.7477	0.7344	0.5234	0.6587		0.1646	0.4457	0.2569			0.7355
FOXJ3	2063	AP	5.1			0	0.9945	0	0	0	0	0	0	0	0	0	0	0	0	0	0	0	0	0	0	0	0	0	0	0	0	0	0	0	0	0	0	0	0	0	0	0	0	0	0	0	0	0	0
FOXJ3	2064	AP	2			0	0.9945	0.9146	0.1873	0.7367	0.4221	0.466	0.2391	0.7924	0.4757	0.2005	0.2983	0.4642	0.4236	0.3254	0.3077	0.6247	0.525	0.6095	0.5477	0.5696	0.6285	0.5966	0.4872	0.5229	0.4459	0.1483	0.3194	0.3353	0.2734	0.5642	0.6151	0.2392	0.2421	0.6928	0.7275	0.4631	0.3069	0.3697	0.7403	0.6412	0.4503	0.6456	0.251
FOXJ3	2065	AP	14.1			0	0.9945	0.7547	0.1317	0.1411	0.1518	0.2803	0.1974	0.1628	0.099	0.2087	0.2897	0.2129	0.1257	0.4049	0.239	0.1983	0.1657	0.1429	0.2026	0.1634	0.2312	0.1759	0.2661	0.2478	0.1856	0.512	0.3384	0.2532	0.4677	0.3454	0.2665	0.2323	0.3526	0.1985	0.1832	0.2811	0.2063	0.4488	0.1494	0.1384	0.2733	0.2015	0.3588
FOXJ3	2066	AP	3			0	0.9945	0.0628	0.0053	0	0	0	0	0	0	0	0	0	0	0	0	0	0	0	0	0	0	0	0	0	0	0	0	0	0	0	0	0	0	0	0	0	0	0	0	0	0	0	0
FOXJ3	2067	AP	1			0	0.9945	0.9241	0.168	0.1223	0.426	0.2537	0.5635	0.0449	0.4254	0.5908	0.412	0.3229	0.4507	0.2696	0.4532	0.177	0.3093	0.2477	0.2497	0.267	0.1403	0.2275	0.2467	0.2292	0.3686	0.3398	0.3422	0.4115	0.2589	0.0903	0.1185	0.5285	0.4052	0.1087	0.0893	0.2558	0.4868	0.1815	0.1103	0.2204	0.2764	0.1528	0.3902
FOXJ3	2068	RI	14.3	14.2	14.4	0	0.9964	0.3493	0.0338	0.0597	0.0197	0.0181	0.0042	0	0.025	0.0166	0.027	0.0091	0.0533	0.0141	0.0165	0.0379	0.0308	0.0181	0.0402	0.0213	0.0835	0.0765	0.0123	0.0741	0.0835	0.0265	0.0523	0.0308	0.0604	0.0808	0.0308	0.0289	0.0562	0.0447	0.0176	0.0289	0.02	0.0426	0.0163	0.0159	0.0191	0.0497	0.1329
FOXJ3	2069	ES	10	9	11	0	0.9945	0.6109	0.0824	0.957	0.8014	0.8065	0.8036	0.9106	0.8224	0.8853	0.9205	0.7026	0.809	0.7403	0.6363	0.9488	0.8285	0.6984	0.8046	0.7955	0.8408	0.8892	0.803	0.7777	0.8873	0.8084	0.8224	0.8599	0.7968	0.6377	0.7563	0.7299	0.7467	0.8038	0.7391	0.6657	0.8576	0.8038	0.7477	0.7661	0.8203	0.8203	0.9427
PPCS	2071	AP	1			0	1	0.1254	0.018	0.0021	0.0567	0.0183	0.0479	0.0075	0.0477	0.0286	0.0218	0.0333	0.0348	0.034	0.0227	0.0137	0.0398	0.0196	0.0389	0.0287	0.0098	0.0079	0.0463	0.0121	0.0167	0.0522	0.0089	0.0604	0.0168	0.0265	0.0075	0	0.0162	0.0198	0.0419	0.0315	0.0358	0.0472	0.0257	0.005	0.0856	0.0185	0.0345
PPCS	2072	AP	2.1			0	1	0.1254	0.018	0.9979	0.9433	0.9817	0.9521	0.9925	0.9523	0.9714	0.9782	0.9667	0.9652	0.966	0.9773	0.9863	0.9602	0.9804	0.9611	0.9713	0.9902	0.9921	0.9537	0.9879	0.9833	0.9478	0.9911	0.9396	0.9832	0.9735	0.9925	1	0.9838	0.9802	0.9581	0.9685	0.9642	0.9528	0.9743	0.9951	0.9144	0.9815	0.9655
PPCS	2073	AT	4			0	1	0.1037	0.017	0.9574	0.9534	0.9454	0.9794	0.9452	0.9857	0.9393	0.9631	0.946	0.9447	0.9495	0.9657	0.9332	0.9726	0.9706	0.9763	0.957	0.9727	0.9535	0.9423	0.9453	0.9687	0.9424	0.9678	0.9205	0.9561	0.9631	0.9472	0.9701	0.9465	0.9667	0.958	0.979	0.9499	0.9251	0.9463	0.9302	0.9258	0.9482	0.9385
PPCS	2074	AT	3.2			0	1	0.1037	0.017	0.0426	0.0466	0.0546	0.0206	0.0548	0.0143	0.0607	0.0369	0.054	0.0553	0.0505	0.0343	0.0668	0.0274	0.0294	0.0237	0.043	0.0273	0.0465	0.0577	0.0547	0.0313	0.0576	0.0322	0.0795	0.0439	0.0369	0.0528	0.0299	0.0535	0.0333	0.042	0.021	0.0501	0.0749	0.0537	0.0698	0.0742	0.0518	0.0615
PPCS	2075	AD	2.2	2.1	3.1	0	1	0.5262	0.0936	0.703	0.5615	0.7614	0.4705	0.8523	0.5208	0.7736	0.8397	0.7655	0.8252	0.717	0.4832	0.8562	0.7731	0.7626	0.676	0.6209	0.6513	0.7841	0.7712	0.7099	0.7985	0.7798	0.7472	0.7616	0.6894	0.7693	0.8386	0.6074	0.755	0.8457	0.8118	0.5528	0.8155	0.7243	0.8441	0.8806	0.796	0.7533	0.8355
PPIH	2095	AP	3.1			0	1	0.0255	0.0035	0.0017	0.0038	0.0085	0.0106	0.0041	0.0079	0	0.0011	0.0055	0.0024	0.0013	0.0025	0.0019	0	0.0051	0.0014	0.0043	0.0075	0.0064	0	0.0064	0.0068	0.007	0.0035	0.0056	0.0048	0	0.0041	0	0.0033	0.0013	0.0048	0.0106	0	0.0063	0.0036	0.0008	0	0	0.0033
PPIH	2096	AP	1			0	1	0.2439	0.0313	0.9434	0.9718	0.9483	0.9671	0.9332	0.9255	0.9515	0.9526	0.9504	0.9555	0.9636	0.9657	0.9779	0.9757	0.9771	0.9807	0.9911	0.9637	0.9346	0.9734	0.9029	0.8788	0.9543	0.9402	0.9434	0.917	0.9492	0.9899	0.9855	0.879	0.9933	0.9856	0.9719	0.9733	0.9513	0.9784	0.913	0.9525	0.9708	0.9688
PPIH	2097	AP	2.1			0	1	0.2398	0.0305	0.0549	0.0244	0.0432	0.0223	0.0628	0.0666	0.0485	0.0464	0.0441	0.0421	0.0352	0.0318	0.0202	0.0243	0.0179	0.0179	0.0046	0.0288	0.0589	0.0266	0.0908	0.1145	0.0387	0.0562	0.051	0.0781	0.0508	0.0061	0.0145	0.1176	0.0054	0.0096	0.0176	0.0267	0.0424	0.0179	0.0862	0.0475	0.0292	0.0279
PPIH	2100	AT	10			0	1	0.1284	0.0215	0.9502	0.993	0.9351	0.9507	0.9824	0.9711	0.9786	0.9763	0.9811	0.9782	0.9804	0.9792	0.9646	0.9677	0.9786	0.965	0.9618	0.9422	0.9135	0.9302	0.9337	0.9622	0.9662	0.9519	0.9411	0.9328	0.9599	0.9404	0.9795	0.9528	0.8957	0.9314	0.9497	0.9926	0.9031	0.9736	0.9907	0.966	0.9501	0.9759
PPIH	2101	AT	9.2			0	1	0.1284	0.0215	0.0498	0.007	0.0649	0.0493	0.0176	0.0289	0.0214	0.0237	0.0189	0.0218	0.0196	0.0208	0.0354	0.0323	0.0214	0.035	0.0382	0.0578	0.0865	0.0698	0.0663	0.0378	0.0338	0.0481	0.0589	0.0672	0.0401	0.0596	0.0205	0.0472	0.1043	0.0686	0.0503	0.0074	0.0969	0.0264	0.0093	0.034	0.0499	0.0241
PPIH	2103	AD	3.3	3.2	4	0	1	0.204	0.0283	0.0515	0.0372	0.056	0.036	0.0565	0.0424	0.0337	0.0776	0.0067	0.0791	0.0481	0.058	0.0496	0.0591	0.044	0.0193	0.0221	0.0996	0.0738	0.0646	0.0747	0.0596	0.0342	0.0163	0.0908	0.1226	0.0289	0.102	0.0171	0.0789	0.086	0.0451	0.0417	0.0476	0.0454	0.0441	0.0458	0.0815	0.0687	0.0272
LEPRE1	2106	RI	14.3	14.2	14.4	0	0.9945	0.9717	0.1543	0.4741	0.4339	0.4542	0.4934	0.2886	0.3286	0.4245	0.4139	0.4418	0.1796	0.442	0.5508	0.3208	0.1045	0.2273	0.419	0.3754	0.5313	0.2797	0.5517	0.3511	0.3917	0.4534	0.464	0.5075	0.8536	0.3341	0.7812	0.272	0.5452	0.3021	0.3851	0.3511	0.5024	0.4796	0.2923	0.2951	0.3783	0.431	0.5888
LEPRE1	2107	RI	14.2:14.3	14.1	14.4	0	1	0.6048	0.0699	0.2539	0.0895	0.1424	0.1413	0.084	0.1249	0.1534	0.1069	0.1429	0.0492	0.1065	0.1719	0.0785	0.0423	0.0726	0.1583	0.158	0.132	0.0757	0.2002	0.1103	0.1198	0.1844	0.105	0.1407	0.2182	0.1102	0.2176	0.0949	0.2757	0.0746	0.1681	0.1346	0.187	0.1567	0.1028	0.1105	0.0926	0.1546	0.2748
LEPRE1	2108	AD	14.2	14.1	14.4	0	0.9982	0.5324	0.0675	0.2819	0.1413	0.2109	0.1754	0.2135	0.2905	0.2586	0.1881	0.2169	0.295	0.1596	0.1822	0.1911	0.2897	0.2594	0.3207	0.3504	0.1645	0.197	0.2299	0.2229	0.2256	0.2619	0.1395	0.2214	0.0867	0.237	0.1684	0.2732	0.3031	0.2392	0.2993	0.2427	0.2229	0.2511	0.2798	0.3085	0.2245	0.2074	0.2574
C1orf50	2109	AT	5			0	0.9982	0.2647	0.0424	0.049	0.0432	0.0534	0	0	0.0604	0	0.0171	0.0467	0.0346	0.0318	0	0	0	0	0.0254	0.0905	0.0386	0.0303	0.0845	0.2066	0.1076	0.0535	0.1279	0.063	0.0993	0.0386	0.0287	0.0181	0	0.1162	0.1641	0	0.018	0.1127	0.0191	0.204	0	0.0458	0
C1orf50	2110	AT	4.3			0	0.9982	0.4477	0.0589	0.9146	0.9568	0.8672	1	1	0.9396	0.971	0.9829	0.8607	0.8623	0.9682	1	1	1	0.9436	0.9746	0.8759	0.9614	0.8796	0.9155	0.7934	0.8924	0.8509	0.796	0.937	0.7898	0.9614	0.9713	0.9279	1	0.8838	0.7816	1	0.982	0.8314	0.9524	0.7581	1	0.8861	0.8973
C1orf50	2111	AT	8			0	0.9982	0.2286	0.0305	0.0364	0	0.0794	0	0	0	0.029	0	0.0926	0.1031	0	0	0	0	0.0564	0	0.0337	0	0.0901	0	0	0	0.0955	0.0761	0	0.1108	0	0	0.054	0	0	0.0543	0	0	0.0559	0.0285	0.0379	0	0.0681	0.1027
C1orf50	2112	AA	2.1	1.3	2.2	0	0.9691	0.2968	0.0573	0.1263	0.1732	0.1226	0.1732	0.1932	0	0.1436	0.1436	0.075	0.1117	0.1486	0.0852	0	0	0	0	0	0	0.0263	0	0.0679	0	0.2608	0.0708	0.0565	0	0.0228	0.1158	0.0445	0.1732	0.0773	0.0513	0.0324	0.0708	0.1732	0.0312	0.0852	0.0811	0.0565	0.0976
C1orf50	2115	ES	1.2:1.3:2.2	1.1	3	0	0.8782	0.6584	0.1097	0.9239	0.8123	1	1	1	1	1	1	0.8294	0.858	1	1	1	1	1	0.869	1	1	0.9083	1	1	1	0.812	1	1	1	1	1	0.8452	1	0.8056	1	1	0.9168	1	0.9478	0.9146	1	0.8462	1
C1orf50	2116	ES	1.3:2.2	1.1	3	0	0.9945	0.1359	0.0217	0.9656	0.9493	1	1	1	1	1	1	0.98	0.9639	1	1	1	1	1	0.94	1	1	0.9562	1	1	1	0.9733	1	1	1	1	1	0.9672	1	0.9714	1	1	0.9716	1	0.9636	0.968	1	0.9606	1
C1orf50	2117	RI	1.2	1.1	1.3	0	0.8764	0.7193	0.1188	0.4017	0.2217	0.3545	0.2217	0.2494		0.2993	0.4845	0.1345	0.2625	0.2993	0.176	0.2993	0.2217	0.2217	0.3681	0.2217	0.3629	0.4278	0.1511	0.4901	0.1626	0.1411		0.2547	0.204	0.3326	0.2166		0.2993	0.1381	0.2993	0.3197	0.3197	0.1547	0.5092	0.343	0.1178	0.2217	0.1459
CCDC23	2118	AP	2			0	1	0.1133	0.0223	0.0282	0.0562	0.0305	0.038	0	0.0145	0.0106	0.0128	0.087	0.0146	0.0677	0.0122	0.0121	0.03	0.0549	0.0487	0.0356	0.0734	0.0505	0.0571	0.0469	0.035	0.0161	0.0164	0.0124	0.0425	0.0398	0	0	0.0381	0	0.0083	0.0088	0.0101	0.0743	0.0764	0.0093	0	0.071	0.0063
CCDC23	2119	AP	1			0	1	0.1133	0.0223	0.9718	0.9438	0.9695	0.962	1	0.9855	0.9894	0.9872	0.913	0.9854	0.9323	0.9878	0.9879	0.97	0.9451	0.9513	0.9644	0.9266	0.9495	0.9429	0.9531	0.965	0.9839	0.9836	0.9876	0.9575	0.9602	1	1	0.9619	1	0.9917	0.9912	0.9899	0.9257	0.9236	0.9907	1	0.929	0.9937
CCDC23	2120	RI	4.2	4.1	4.3	0	1	0.0484	0.006	1	0.9911	0.994	1	1	1	0.9929	1	0.9888	0.9878	1	0.9767	0.9678	0.9864	1	1	1	1	1	1	0.9867	0.9935	1	1	0.99	0.9828	0.9937	0.9923	0.9833	1	1	0.9741	0.9932	0.9854	0.9863	0.9897	1	0.9897	0.9516	0.9957
ERMAP	2121	AP	2.1			0	0.9927	0.2398	0.0444	0.0297	0	0	0.0254	0	0	0	0	0	0.0647	0	0	0	0	0	0.0502	0.0764	0.0465	0.0346	0.1453	0	0	0.0548	0	0.0709	0	0	0	0	0.0391	0	0.0387	0	0	0.0258	0.0858	0	0.0478	0	0.1283
ERMAP	2122	AP	3.1			0	0.9927	0.7791	0.1223	0.1718	0.1414	0.1603	0.095	0.1337	0.0274	0.0769	0.1206	0.2714	0.3139	0.2446	0.1401	0.0795	0.1706	0.1018	0.1781	0.214	0.2085	0.1679	0.1719	0.2469	0.1831	0.3481	0.22	0.384	0.2891	0.2196	0.161	0.1743	0.4092	0.084	0.2169	0.1488	0.3771	0.2796	0.1443	0.2446	0.125	0.2453	0.4194
ERMAP	2123	AP	1			0	0.9927	0.7791	0.1354	0.7985	0.8586	0.8397	0.8796	0.8663	0.9726	0.9231	0.8794	0.7286	0.6214	0.7554	0.8599	0.9205	0.8294	0.8982	0.7717	0.7097	0.745	0.7975	0.6828	0.7531	0.8169	0.5971	0.78	0.5451	0.7109	0.7804	0.839	0.8257	0.5516	0.916	0.7443	0.8512	0.6229	0.6946	0.7699	0.7554	0.8272	0.7547	0.4523
ERMAP	2124	RI	3.3	3.2	3.4	0	0.9327	1	0.1408	0.274	0.0985	0.2671	0.0706	0.064	0.1633	0.3894	0.0436	0.3297	0.1827	0.1648	0.1676	0.1068	0.199	0.3534	0.1341	0.1073	0.144	0.2003	0.1202	0.1665	0.3534	0.1606	0.1351	0.1753	0.1613	0.2767	0.3235	0.0679	0.2418	0.1073	0.3936	0.1459	0.1753	0.2052	0.1817	0.1202	0.2546	0.1541	0.3534
ZNF691	2127	ES	3	2.3	4	0	0.8564	0.7807	0.1253	0.0782		0.1691	0.3372				0.1194	0.4116	0.1269	0.3114	0.2977		0.179	0.0535	0.2303	0.3954	0.0535	0.2338	0.2028	0.3114	0.1537	0.1537		0.2028	0.2028	0.2445	0.2642		0.179	0.0923	0.379	0.145	0.2028	0.1578	0.0833		0	0.2203	0.195
ZNF691	2128	RI	2.2	2.1	2.3	0	0.7564	0.9487	0.2152			0.3064				0.5631	0.6236	0.802		0.7542		0.5631		1	0.5956	0.7864		0.5031	0.5031	0.58	0.7341	0.5249	0.802	0.8467	0.8944		0.441	0.2691	0.8549	0.3152	0.5631	0.5249	0.2275	0.5383	0.457	0.7205	0.2275	0.4531	0.7384
ZNF691	2131	AD	2.2:2.3	2.1	4	0	0.9418	0.8956	0.1907	0.635		1	0.8808	0.6779	0.4929	1	0.6886	0.9457	1	0.8074	0.6562	1	1	0.7169	0.8803	0.5564	0.484	0.7583	0.8649	0.7674	0.9141	0.7304	0.6014	0.8186	0.7854	1	0.5372	1	0.6748	0.462	0.788	0.601	0.4846	0.8047	0.8007	0.2853	0.7119	0.6219	0.9337
ZNF691	2132	ES	2.3	2.1	4	0	0.88	1	0.1829	0.8757		1		0.8325	0.6952	1	0.6535	0.8262	1	0.6249	0.7366	1	1		0.8811	0.2966	0.4813	0.7369	0.8868	0.7239	0.8398	0.7792	0.309	0.5076	0.3545	1	0.6503	1	0.3113	0.724	0.7745	0.6465	0.7925	0.8204	0.8665	0.162	0.9144	0.7247	0.8635
ZNF691	2135	ES	2.1:2.2:2.3	1	4	0	0.9582	1	0.1999	0.0723		0.4613	0.4884	0.1426	1	0.501	0.3761	0.6059	0.1094	0.4855	0.4963	0.7716		0.432	0.5013	0.4376	0.3041	0.2593	0.493	0.4626	0.6129	0.4959	0.7197	0.8891	0.6328	0.5256	0.4368	0.4537	0.6001	0.3438	0.5069	0.3276	0.2442	0.3697	0.3504	0.1814	0.149	0.3483	1
ZNF691	2136	ES	2.1:2.3	1	4	0	0.9364	1	0.1893	0.5292		0.8171		0.497	1	0.7968	0.3982	0.4293	0.4451	0.3439	0.6557	0.8511	0.9018	0	0.5607	0.2778	0.2887	0.4013	0.6877	0.449	0.8026	0.6387	0.5021	0.7161	0.2874	0.5934	0.574	0.7664	0.317	0.6851	0.7228	0.4271	0.4677	0.4919	0.5378	0.1136	0.6283	0.6874	1
ZNF691	2137	ES	2.1	1	4	0	0.8745	1	0.1895	0.3002			0.2943	0.2449			0.3655	0.1567	0	0.2729	0.5138			0.2943	0.2502	0.5002	0.3405	0.182		0.2383	0.5816	0.4421	0.7239	0.7618	0.4635		0.4838		0.5748	0.6046	0.502	0.3491	0.2443	0.2144	0.2172	0.4164	0.1989	0.5691
SLC2A1	2138	AT	7			0	1	0.0928	0.0101	0.0064	0.0199	0.0014	0	0.0239	0.0699	0.0045	0.01	0.0194	0.0015	0.0087	0.0066	0.025	0.0028	0.0041	0.0139	0.0116	0.008	0.0035	0.0015	0.0079	0.0052	0.0299	0.0059	0.0042	0.0139	0.0125	0.0113	0.0056	0.0061	0.0028	0.0087	0.0219	0.0068	0.0101	0.0048	0.0044	0.0033	0.0086	0.0273
SLC2A1	2139	AT	4.3			0	1	0.0869	0.007	0.0069	0.0125	0.0109	0	0.0075	0.022	0.0026	0.0123	0.0153	0.0004	0.0042	0	0.0291	0.0017	0.0041	0.0029	0.0146	0.0081	0.0031	0.0016	0.005	0.0047	0.0127	0.0034	0.0042	0.0095	0.0106	0.0087	0.0036	0.007	0.0027	0.0077	0	0.0034	0.0046	0.0045	0.0028	0.0029	0.0045	0.019
SLC2A1	2140	AT	11			0	1	0.1797	0.0162	0.9866	0.9676	0.9877	1	0.9685	0.9081	0.9929	0.9777	0.9653	0.998	0.9871	0.9934	0.9459	0.9955	0.9919	0.9832	0.9738	0.984	0.9934	0.9969	0.9871	0.9901	0.9574	0.9908	0.9916	0.9766	0.9769	0.98	0.9908	0.987	0.9946	0.9836	0.9781	0.9898	0.9853	0.9907	0.9927	0.9938	0.9868	0.9537
FAM183A	2141	AP	1			0	0.9273	1	0.2826	0.7877	0.0051	0.9051	0.0311	0.3097	0	0.5668	0.7866	0.5122		0.5049	0.017	0.8668	0.5837	0.6804	0.0166	0.0266	0.1416	0.5287	0.3097	0.3848	0.6777	0.3292	0.6682	0.5181	0.0925	0.4569	0.1472	0.8898	0.3408	0.6777	0.2566	0.0234	0.9234	0.5471	0.8138	0.6129	0.2518	0.073	0.4545
FAM183A	2142	AP	2.1			0	0.9273	1	0.2826	0.2123	0.9949	0.0949	0.9689	0.6903	1	0.4332	0.2134	0.4878		0.4951	0.983	0.1332	0.4163	0.3196	0.9834	0.9734	0.8584	0.4713	0.6903	0.6152	0.3223	0.6708	0.3318	0.4819	0.9075	0.5431	0.8528	0.1102	0.6592	0.3223	0.7434	0.9766	0.0766	0.4529	0.1862	0.3871	0.7482	0.927	0.5455
EBNA1BP2	2145	AP	2.1			0	1	0.2784	0.0375	0.9576	0.9126	0.972	0.9783	0.9775	0.938	0.9929	0.9946	0.9644	0.9969	0.955	0.7693	0.9938	0.9985	0.9967	0.8134	0.8255	0.9801	0.9884	0.9831	0.9496	0.984	0.9913	0.998	0.9921	0.9477	0.9142	0.9858	0.9752	0.9661	0.9772	0.9776	0.9264	0.991	0.9196	0.9247	0.9963	0.9741	0.9733	0.9839
EBNA1BP2	2146	AP	1			0	1	0.2784	0.0375	0.0424	0.0874	0.028	0.0217	0.0225	0.062	0.0071	0.0054	0.0356	0.0031	0.045	0.2307	0.0062	0.0015	0.0033	0.1866	0.1745	0.0199	0.0116	0.0169	0.0504	0.016	0.0087	0.002	0.0079	0.0523	0.0858	0.0141	0.0248	0.0339	0.0228	0.0224	0.0736	0.009	0.0804	0.0753	0.0037	0.0259	0.0267	0.0161
C1orf210	2154	AD	1.2	1.1	2	0	0.9473	0.3533	0.0581	0.9221	1	1	1	1	0.9488		0.9415	1	1	1	0.9662	1	0.8428	1	0.9811	0.9694	0.969	0.9306	1	0.9444	0.886	1	0.9346	1	0.9755	1	1	0.9457	1	0.9482	0.9234	0.9457	1	0.9283	0.9283	1	0.9429	1	1
TIE1	2158	AT	8			0	1	0.1535	0.018	0.0465	0	0.1036	0.0269	0	0.0113	0	0.0219	0	0.0148	0.0091	0.0519	0.0098	0	0	0.0119	0.0297	0.0318	0	0.0835	0.0145	0	0.0236	0	0	0	0.0129	0.0311	0.0654	0.0321	0.0238	0	0.0237	0	0.0144	0.0298	0	0	0.0341	0.0153
TIE1	2159	AT	24			0	1	0.1535	0.018	0.9535	1	0.8964	0.9731	1	0.9887	1	0.9781	1	0.9852	0.9909	0.9481	0.9902	1	1	0.9881	0.9703	0.9682	1	0.9165	0.9855	1	0.9764	1	1	1	0.9871	0.9689	0.9346	0.9679	0.9762	1	0.9763	1	0.9856	0.9702	1	1	0.9659	0.9847
TIE1	2160	ES	07:09:00	6	10	0	0.9727	0.1579	0.0118	1	1	0.9676	0.9962	1	1	1	1	1	1	1	0.9934	1	1	1	1	1	1	1	1	1	1	1	1	1	1	1	1	1	1	1	1	1	1	1	1	1	1	1	1
TIE1	2162	ES	7	6	9	0	0.9309	0.5967	0.0869	0.7395	0.9325	0.78	0.8854	0.865	0.9043	0.7644	0.9012	0.7087	0.8061	0.8278	0.9326	0.8818	0.8665	0.7526	0.8799	0.8604	0.8213	0.8902	0.9561	0.8487	1	0.8242	0.8169	1	0.8319	0.9152	0.8169	1	0.8824	0.7849	0.8978	0.8836	1	0.8423	0.8439	0.7566	0.725	0.825	0.7834
CDC20	2165	AP	2.1			0	0.9255	0.5495	0.0529	0.1159		0.0629		0.1111		0.1647	0.1328	0.0954	0.0704	0.0571		0.1252	0.1135	0.0917			0.2513	0.1145	0.0973	0.0725	0.1391	0.0917	0.0946	0.0937	0.1187	0.1559	0.1274	0.1518	0.1187	0.1292	0.1793		0.1374	0.2339	0.0947	0.1531	0.09	0.2077	0.1051
CDC20	2166	AP	1			0	0.9255	0.5495	0.0529	0.8841		0.9371		0.8889		0.8353	0.8672	0.9046	0.9296	0.9429		0.8748	0.8865	0.9083			0.7487	0.8855	0.9027	0.9275	0.8609	0.9083	0.9054	0.9063	0.8813	0.8441	0.8726	0.8482	0.8813	0.8708	0.8207		0.8626	0.7661	0.9053	0.8469	0.91	0.7923	0.8949
ELOVL1	2167	ES	4	3	5	0	1	0.0335	0.0035	0.9976	0.9816	1	0.9955	1	0.9973	0.9971	1	0.9967	1	1	0.997	1	0.9966	0.9981	0.9967	1	1	1	0.9971	0.9971	0.9957	0.9944	0.9936	0.9982	1	1	0.9914	0.9897	0.9968	0.9975	1	1	0.9959	1	1	1	1	0.9973	0.9985
MED8	2170	RI	7.2	7.1	7.3	0	1	0.144	0.0194	0.9501	0.9578	0.9849	0.9903	0.9711	0.9619	0.9812	0.971	0.991	1	0.9755	0.9432	0.9838	0.9555	0.9778	0.9486	0.959	0.9649	0.9679	0.9478	0.9705	0.9797	0.9934	0.9625	1	0.9768	0.9755	0.9654	0.9935	0.9892	0.9787	0.9671	0.9803	0.9866	0.9794	0.9578	1	0.9887	0.9754	0.9627
MED8	2171	AA	3.1	2.2	3.2	0	1	0.0434	0.0085	0.9841	1	0.993	1	0.9819	0.9608	1	1	0.9883	1	1	1	1	1	0.9908	1	1	1	1	0.9889	1	0.9873	0.9919	1	1	1	0.9915	1	0.9828	1	0.9828	0.9838	0.9872	0.9888	0.967	1	0.9852	1	1	1
MED8	2172	AA	2.1	1	2.2	0	1	0.3209	0.0381	0.0643	0.0657	0.0451	0.0739	0.0237	0.06	0.0924	0.1381	0.1023	0.0756	0.0688	0.0814	0.1387	0.0301	0.1072	0.0896	0.1148	0.06	0.0724	0.1096	0.0668	0.0718	0.1325	0.0541	0.1106	0.1543	0.152	0.1587	0.0948	0.0533	0.1085	0.1074	0.0405	0.033	0.084	0.087	0.0937	0.0863	0.0867	0.0745
SZT2	2175	AT	7			0	1	0.3002	0.0499	0.0877	0.1345	0.1429	0.1095	0.12	0.1217	0.1468	0.3503	0.0936	0.1561	0.08	0.1456	0.1433	0.1429	0.1134	0.0976	0.101	0.1744	0.1664	0.1711	0.1371	0.1572	0.1823	0.1584	0.1373	0.1356	0.1131	0.1693	0.2371	0.0943	0.3342	0.1998	0.1299	0.0923	0.1223	0.1299	0.1184	0.1826	0.2	0.1185
SZT2	2176	AT	5			0	1	0.4589	0.0466	0.154	0.1515	0.1406	0.1273	0.1031	0.1357	0.1358	0.1168	0.1363	0.0905	0.0896	0.13	0.141	0.1203	0.0487	0.0803	0.08	0.1132	0.1416	0.1547	0.1164	0.1573	0.1291	0.1289	0.0984	0.126	0.101	0.0981	0.1395	0.11	0.1534	0.1418	0.1674	0.0872	0.1525	0.1247	0.0959	0.1122	0.1448	0.1055
SZT2	2177	AT	74			0	1	0.6585	0.0757	0.7583	0.714	0.7165	0.7633	0.7769	0.7426	0.7173	0.5329	0.7701	0.7535	0.8304	0.7244	0.7157	0.7368	0.8379	0.8221	0.819	0.7123	0.692	0.6743	0.7464	0.6855	0.6886	0.7127	0.7643	0.7385	0.7859	0.7326	0.6234	0.7957	0.5124	0.6585	0.7027	0.8205	0.7252	0.7454	0.7857	0.7052	0.6551	0.776
HYI	2181	AT	8.3			0	1	0.3842	0.0594	0.0517	0.0546	0.06	0.0535	0.1075	0.0715	0.2519	0.2695	0.1841	0.2394	0.069	0.0464	0.1366	0.2182	0.1142	0.0625	0.0734	0.0716	0.0857	0.0825	0.1071	0.1559	0.1295	0.1193	0.2628	0.2457	0.102	0.1345	0.069	0.1692	0.0989	0.216	0.0286	0.0421	0.0807	0.0923	0.1989	0.1366	0.1345	0.1951
HYI	2182	AT	9			0	1	0.3842	0.0594	0.9483	0.9454	0.94	0.9465	0.8925	0.9285	0.7481	0.7305	0.8159	0.7606	0.931	0.9536	0.8634	0.7818	0.8858	0.9375	0.9266	0.9284	0.9143	0.9175	0.8929	0.8441	0.8705	0.8807	0.7372	0.7543	0.898	0.8655	0.931	0.8308	0.9011	0.784	0.9714	0.9579	0.9193	0.9077	0.8011	0.8634	0.8655	0.8049
HYI	2183	AD	8.2	8.1	9	0	0.9927	0.8905	0.0825	0.2406	0.3928	0.237	0.308	0.3311	0.2995	0.4727	0.2954	0.2966	0.3991	0.2965	0.3581	0.2256	0.1424	0.2801	0.3251	0.3392	0.2192	0.2315	0.2992	0.2111	0.3174	0.2684	0.3435	0.2782	0.4359	0.3278	0.2489	0.3872	0.2912	0.4298	0.2389	0.2859	0.2933	0.3343	0.2657	0.341	0.3174	0.2986	0.2876
HYI	2184	ES	3	2.1	4	1	0.8655	0.6774	0.1021	0.7851	0.752	0.8043	0.7307	0.8148	0.8121		0.7584	0.865		0.7608	0.747	0.5627	0.7942	0.7904	0.8902	0.8245	0.6951	0.6617	0.7974	0.9068	0.8742	0.9342	0.7832	0.9081	0.9078	0.6927	0.8245		0.913	0.8544	0.7998	0.678	0.7803	0.8021	0.7832		0.7535	0.7685	0.8224
HYI	2185	AD	2.2	2.1	4	1	0.8655	0.4111	0.0487	0.8675	0.905	0.8927	0.9294	0.8952	0.9396		0.8155	0.8488		0.8748	0.911	0.7928	0.8844	0.8974	0.9542	0.9318	0.8938	0.8629	0.8717	0.9608	0.8938	0.9516	0.8921	0.9107	0.8869	0.851	0.8783		0.9299	0.923	0.8352	0.9109	0.8877	0.8924	0.8844		0.796	0.8212	0.8756
PTPRF	2186	AP	1			0	0.9891	0	0	1	1	1	1	1	1	1	1	1	1	1	1	1	1	1	1	1	1	1	1	1	1	1	1	1	1	1	1	1	1	1	1	1	1	1	1	1	1	1	1
PTPRF	2188	AP	3.1			0	0.9891	0	0	0	0	0	0	0	0	0	0	0	0	0	0	0	0	0	0	0	0	0	0	0	0	0	0	0	0	0	0	0	0	0	0	0	0	0	0	0	0	0	0
PTPRF	2189	ES	23	22	24	0	1	0.1227	0.0114	0.0183	0.0267	0.0144	0.0173	0.0042	0.0139	0.0263	0.0139	0.0013	0.0322	0.009	0.0138	0.0055	0.0023	0.0081	0.0115	0.031	0.0212	0.0039	0.0103	0.0027	0.0052	0.0085	0.0141	0.0319	0.0107	0.013	0.0173	0.0069	0.0092	0.0154	0.0147	0.0139	0.0113	0.0113	0.0052	0.0027	0.004	0.0048	0.0139
PTPRF	2190	ES	14	13	15	0	1	0.9059	0.1537	0.2761	0.1841	0.3858	0.1991	0.1606	0.2631	0.6461	0.4499	0.0487	0.3759	0.067	0.1958	0.2292	0.5248	0.502	0.2255	0.1889	0.3033	0.4249	0.1741	0.0913	0.3773	0.3289	0.3856	0.631	0.3529	0.289	0.3412	0.311	0.5492	0.1333	0.323	0.1695	0.5106	0.1734	0.1357	0.079	0.2411	0.4361	0.4882
PTPRF	2191	ES	12	11	13	0	0.9982	0.2601	0.0164	0.9934	1	0.9978	0.9955	0.9901	0.9933	0.9963	0.9914	0.9992	1	1	0.9932	0.9887	1	1	0.9902	1	0.9991	0.995	0.9978	1	0.9931	1	0.9896	1	1	0.9854	0.9986	0.9569	0.9971	0.9986	0.9903	0.9909	0.9845	0.9963	0.9965	1	1	1	0.9754
ST3GAL3	2192	AP	1			0	0.8527	1	0.186	0.2073	0		0.0856		0.0817	0.4707		0.4157	0.1774	0.0817				0.1127		0.1392	0.1952	0.5113	0.0817	0.162	0.5873	0.3078	0.4001	0.5309	0.5052	0	0.4344	0.337	0.5829	0.1127	0.2287	0	0.1819	0.1177	0.0664	0.3078	0.1819		0.3722
ST3GAL3	2194	AP	2			0	0.8527	1	0.186	0.7927	1		0.9144		0.9183	0.5293		0.5843	0.8226	0.9183				0.8873		0.8608	0.8048	0.4887	0.9183	0.838	0.4127	0.6922	0.5999	0.4691	0.4948	1	0.5656	0.663	0.4171	0.8873	0.7713	1	0.8181	0.8823	0.9336	0.6922	0.8181		0.6278
ST3GAL3	2195	AT	21			0	1	0.1374	0.0191	0.9609	0.9815	0.9604	0.9858	0.9576	1	0.9928	0.9826	0.968	0.9787	0.9827	0.9697	0.9742	0.9662	0.9911	0.9675	0.9847	0.9869	0.952	0.9601	0.9746	0.9613	0.9708	0.959	0.9751	0.9466	0.986	0.9652	0.9887	0.9522	0.991	0.9602	0.9597	0.9815	0.9389	0.9518	0.975	0.9779	0.9629	0.9557
ST3GAL3	2197	AT	18			0	1	0.1374	0.0191	0.0391	0.0185	0.0396	0.0142	0.0424	0	0.0072	0.0174	0.032	0.0213	0.0173	0.0303	0.0258	0.0338	0.0089	0.0325	0.0153	0.0131	0.048	0.0399	0.0254	0.0387	0.0292	0.041	0.0249	0.0534	0.014	0.0348	0.0113	0.0478	0.009	0.0398	0.0403	0.0185	0.0611	0.0482	0.025	0.0221	0.0371	0.0443
ST3GAL3	2198	AA	19.1	16.2	19.2	0	0.9945	0.0487	0.0058	1	1	1	1	1	1	0.9639	1	1	1	1	1	0.9842	1	1	1	1	1	1	1	1	1	1	1	1	1	1	1	0.9856	1	1	0.9748	0.9734	1	1	1	1	1	1	1
ST3GAL3	2199	ES	19.1:19.2:20	16.2	21	0	1	0.3262	0.0228	0.9812	1	1	0.9853	1	0.983	1	0.9517	0.9713	0.989	0.9624	0.9554	0.9885	1	1	1	0.9601	0.9545	0.9829	1	0.988	1	0.9783	0.9873	0.9887	0.9947	0.9841	1	1	0.9752	1	0.9811	1	0.978	0.9752	0.9817	0.9674	1	1	0.9648
ST3GAL3	2201	ES	16.1:16.2:19.1:19.2:20	15.1	21	0	0.8873	0.6689	0.0859	1	1	1	1		1	1	0.9369	0.646	0.9464	1	1	0.9071	1	1	1	1	1	1		1	1	1	1	1	1	1	1	1	0.8311	1	1	1		1	1		1	1
ST3GAL3	2202	ES	16.2:19.1:19.2:20	15.1	21	0	1	0.6342	0.0284	1	1	1	1	1	1	1	0.9836	0.9677	0.9937	1	1	0.9858	1	1	1	1	1	1	1	1	1	1	1	1	1	1	1	1	0.9295	1	1	1	0.9758	1	1	1	1	1	1
ST3GAL3	2210	ES	16.2	15.1	19.1	0	0.9945	0.0837	0.0086	1	1	1	1	1	1	1	1	1	1	1	1	1	1	1	1	1	1	1	1	1	1	1	0.953	1	0.9919	1	1	1	1	1	1	1	0.9614	1	0.9745	1	1	1	1
ST3GAL3	2211	AA	16.1	15.1	16.2	0	0.9673	0.4783	0.0618	0.084	0.084	0.1038	0.098	0	0.1325	0.0534	0.2105	0.0625	0.1056	0.0902	0.1401	0.1312	0.1598	0.0466	0.0717	0.0683	0.1209	0.0515	0.0309	0.1117	0.0873	0.0891	0.2391	0.1312	0.0948	0.1421	0.1231	0.105	0.2895	0.2136	0.0653	0.1774	0	0.0909	0.1317	0.0391	0.1964	0.1549	0
ST3GAL3	2212	ES	14:15.1:16.1:16.2:19.1:19.2:20	13	21	0	0.8	0.8082	0.1139	0.7434	0.7134	1	1		1	0.65	0.9021	1	1	1	1	1	1		1		1			0.8679	1	1	1	1	0.9314	1	1	1	0.6924	1	0.7012	1		0.8206	0.8444	1	0.8937	1
ST3GAL3	2213	ES	14:15.1:16.2:19.1:19.2:20	13	21	0	0.9982	0.0957	0.0118	0.9789	0.9579	1	1	1	1	0.9653	0.9851	1	1	1	1	1	1	0.9753	1	0.9785	1	0.9832	1	0.9866	1	1	1	1	0.9942	1	1	1	0.9043	1	0.9795	1	1	0.9746	0.98	1	0.9804	1	0.9641
ST3GAL3	2223	ES	14:15.1:16.2	13	19.1	0	0.9982	0.1247	0.0096	1	0.9534	1	1	1	1	1	1	1	1	1	1	1	1	1	0.9845	1	1	1	1	1	1	1	1	1	1	1	1	1	1	1	0.9757	1	1	1	1	1	1	1	1
ST3GAL3	2229	ES	13:14:15.1:16.1:16.2:19.1:19.2:20	9	21	0	0.7764	0.4108	0.0242	1	1		1		1	1	1	1	1	1	1	1	1		1		1			1	1	1	1	1	1	1	1	1	1	1	1	1		1	1	1	1	1
ST3GAL3	2231	ES	12:13:14:15.1:16.2:19.1:19.2:20	9	21	0	0.7545	0.4056	0.0246		1	1			1		1	1	1	1	1	1	1		1	1	1		1	1	1	1	1	1	1	1	1	1		1	1			1	1	1	1		1
ST3GAL3	2232	ES	10:13:14:15.1:16.2:19.1:19.2:20	9	21	0	0.9818	0.2466	0.014	1	1	1	1	1	1	1	1		1	1	1	1	1	1	1	1	1	1	1	1	1	1	1	1	1	1	1	1	1	1	1	1	1	1	1	1	1	1	1
ST3GAL3	2233	ES	13:14:15.1:16.2:19.1:19.2:20	9	21	0	0.9964	0.053	0.0025	1	1	1	1	1	1	1	1	1	1	1	1	1	1	1	1	1	1	1	1	1	1	1	1	1	1	1	1	1	1	1	1	1	1	1	1	1	1	1	1
ST3GAL3	2271	ES	11:12:00	9	13	0	0.9727	0.2586	0.033	0.052	0	0	0.0039		0	0	0.0613	0.0991	0.0254	0.0118	0.0137	0.0429	0.0371	0	0.0164	0	0.0231	0.0213	0	0.0158	0.0801	0.0137	0	0.0342	0.0668	0.0552	0.038	0.0575	0.0974	0.0115	0.0233	0.0479	0.0323	0.0511	0.0182	0.0807	0.0283	0.0105	0.0188
ST3GAL3	2272	ES	12	9	13	0	0.9709	0.5447	0.0938	0	0.1329	0.1148	0.007		0.153	0	0.1451	0.1235	0.0957	0.089	0.0462	0.2124	0.2263	0	0.0764	0.1224	0.0404	0	0.1892	0.0334	0.2301	0.0462	0.0958	0.1237	0.2161	0.0717	0.0954	0.3929	0	0.0943	0.0369	0	0	0.1536	0.0691	0.0513	0.1328	0.0264	0.0477
ST3GAL3	2273	ES	10	9	13	0	0.9855	0.6502	0.1128	0.2029	0.1088	0.0719	0.1228	0.2873	0.1166	0.1007	0.2654	0.0325	0.2834	0.1215	0.1384	0.4106	0.3654	0.1239	0.0569	0.075	0.2607	0.1244	0.1342	0.0592	0.4792	0.1384	0.2405	0.1247	0.3751	0.2134	0.2304	0.3093	0.2235	0.2299	0.1388	0.1355	0.1365	0.2167	0.2156	0.1281	0.1697	0.1438	0.2012
ST3GAL3	2291	ES	09:10:00	6	13	0	0.7727	0.5517	0.0724	1	1		1	1	1		1		0.9557		1	1	1	0.7027	0.7021	1	1	1			1		1	1	0.9731	0.8474	1	1	1	1	1	1		1	1		1	1	1
ST3GAL3	2294	ES	7.1:7.2:9	6	13	0	0.7618	0.7059	0.071	1	1	0.7209	1		1		1	1	0.7631	1		1			0.8622	1		1	1	1	1	1	1	1	0.7973		1	1	1	1	1	1	1	1	1	1	1	1
ST3GAL3	2296	ES	9	6	13	0	0.9964	0.1552	0.0127	1	1	0.9557	1	1	1	1	1	1	0.9885	1	1	1	1	0.9627	0.9797	1	1	1	1	1	1	1	1	1	0.989	0.9749	1	1	1	1	1	1	1	1	1	1	1	1	1
ST3GAL3	2297	ES	7.1:7.2:8	6	9	0	0.9382	0.2683	0.0279	0.0038	0.0049	0	0.0035	0.0312	0	0		0	0.003	0.0527	0.0412	0		0.0292	0	0.0049	0.03	0.0042	0	0.0034	0		0	0.0042	0	0	0.1014	0.0102	0	0.0039	0.0062	0	0	0	0.0061	0.0075	0.0075	0	0.2683
ST3GAL3	2298	ES	7.2:8	6	9	0	0.9291	0.1262	0.0091	0.0051	0.0066	0	0.0047	0	0	0		0	0.0041	0	0	0		0	0	0.0066	0	0.0056	0	0.0046	0		0	0.0056	0	0	0	0.0137	0	0.0052	0.0084	0	0	0	0.0082	0.01	0.01	0	0
ST3GAL3	2299	ES	7.1:7.2	6	9	0	0.9727	0.5136	0.0836	0.1686	0.1091	0.1398	0.1575	0.0479	0.2318	0.0809	0.1744	0.2852	0.054	0.2318	0.0479	0.2406		0.0229	0.1411	0.0968	0.0523	0.0836	0.2197	0.1218	0.2424	0.4681	0.4131	0.1985	0.0591	0.0439	0.1079	0.1611	0.1704	0.0783	0.1353	0.1497	0.105	0.1636	0.0624	0.1234	0.1744	0.1497	0
ST3GAL3	2300	ES	7.2	6	9	0	0.9255	0.148	0.0109	0	0	0	0	0	0	0		0	0	0	0	0		0	0	0	0	0	0	0	0		0	0	0	0	0	0	0	0	0	0	0	0	0	0	0	0	0
ST3GAL3	2302	ES	5.1:5.2	4	6	0	0.9	0.2941	0.0419	0.0303	0.0423	0.0123	0	0	0.0316	0.0725		0.1795	0.0293	0.0222	0.0204	0.0083	0.0303	0.0244	0.0303	0	0.0303	0.0361	0	0.068		0		0	0.0427	0.0943	0.1652	0.1	0.0095	0.1111	0.0229	0	0.0123	0.0769	0.04	0.0145	0.0649	0.0123	0.0345
ST3GAL3	2303	ES	5.1	4	6	0	0.8945	0.3967	0.0367	0.0306	0	0.0125	0	0	0	0.0732	0.1122	0	0.0296	0.0225	0.0206	0.0084	0.0306	0.0247	0.0306	0	0	0.0247	0	0		0.1031	0.0349	0.0808	0.0432	0.0953	0	0.101	0.0096	0.1122	0.0232	0	0.0125	0	0.0404	0.0147	0.0656	0.0125	0.0349
ST3GAL3	2424	ES	4:6:9:10	3.1	13	0	0.7691	0.4047	0.0357	1	1		1	1	1		1		1		1	1	1	1	1	1	1	0.6808		1	1		1	1	1	1	1	1	1	1	1	1		1	1	0.5954	1	0.6915	1
ST3GAL3	2464	ES	04:06:09	3.1	13	0	0.9927	0.1183	0.0068	1	1	1	1	1	1	1	1	1	1	1	1	1	1	1	1	1	1	0.9691	1	1	1	1	1	1	1	1	1	1	1	1	1	1	1	1	1	0.9438	1	0.9485	1
ST3GAL3	2480	ES	4	3.1	6	0	0.98	0.4225	0.0686	0.8453	0.8477	0.872	0.9671	0.7757	0.9651	0.6808	0.8534	0.8306	0.8964	0.9074	0.9433	1	1	0.9504	0.9127	1	0.9467	0.8902	0.5775	0.9489	1	0.8715	0.8004	0.8427	0.9713	0.8938	0.9107	0.8587	0.9392	0.9573	0.9663	0.9495	0.923	0.9389	0.8719	0.9431	1	1	0.8246
ST3GAL3	2482	AD	3.2	3.1	4	0	0.9145	0.4237	0.078	0.0787	0.1656	0.1529	0.0709	0.0864	0.1169	0.0397		0.0248	0.0503	0.0126	0.1691	0.0621		0.0216	0.0794	0.0593	0.1911	0.0993		0.0722		0.2093	0.0523	0.1553	0.3156	0.0484	0.1024	0.1419	0.0685	0.0709	0.1282	0.0523	0.0422	0.1119	0.1129	0.1807	0.2209	0.2312	0.1242
ARTN	2483	AP	4.1			0	0.9509	0.9253	0.1208	0.3717		0.4206		0.1396	0.1057	0.3031	0.4657	0.3596	0.4437	0.4289	0.4537	0.3856	0.1721	0.771	0.4551	0.1381	0.493	0.3291	0.34	0.2277	0.3802	0.3956	0.3787	0.3968	0.4414	0.3812	0.3976	0.4979	0.5079	0.4054	0.241		0.3548	0.3046	0.3639	0.4085	0.3298	0.4799	0.5535
ARTN	2485	AP	3.1			0	0.9509	0.6608	0.0999	0.2126		0.2463		0.207	0.4703	0.2409	0.2614	0.4858	0.159	0.2386	0	0.2692	0.2809	0.0817	0.3165	0.3074	0.1266	0.2905	0.1746	0.3665	0.2847	0.3884	0.2586	0.341	0.3581	0.2468	0.291	0.1645	0.2713	0.198	0.3139		0.3221	0.3389	0.2507	0.2045	0.2961	0.2153	0.2219
ARTN	2486	AP	1			0	0.9509	0.9768	0.133	0.4157		0.3331		0.6534	0.424	0.4561	0.2729	0.1546	0.3973	0.3325	0.5463	0.3452	0.5469	0.1473	0.2283	0.5544	0.3804	0.3804	0.4854	0.4058	0.3351	0.216	0.3627	0.2622	0.2004	0.372	0.3114	0.3376	0.2208	0.3966	0.4451		0.3232	0.3565	0.3854	0.387	0.3741	0.3048	0.2246
ARTN	2489	AA	3.2	2	3.3	0	0.7982	0.5916	0.0983	0.7288		0.6832		0.5898		0.732	0.7654		0.7861	0.6937		0.7737	0.573			0.6681		0.5509	0.5799	0.6837	0.5881	0.8364	0.6621	0.7154	0.7687	0.7568	0.7285	0.8547	0.7515	0.7343	0.5898		0.6801		0.7686	0.7166	0.8191	0.7172	0.7043
ARTN	2490	ES	2	1	3.2	0	0.8455	0.2632	0.0289	0.9855		1		1		1	1		1	1		1	1	1		1		0.9603	1	0.9372	0.9706	1	1	0.9855	0.9895	1	0.9882	0.9828	0.9536	1	1		0.952	1	1	0.9751	0.9901	0.9775	1
IPO13	2491	AP	16.1			0	1	0.6016	0.0818	0.0713	0.0998	0.0298	0.1063	0.0692	0.0561	0.155	0.0235	0.1109	0.0794	0.1122	0.1151	0.0731	0.059	0.063	0.1039	0.151	0.1015	0.0537	0.1545	0.1502	0.0411	0.1123	0.17	0.2412	0.1591	0.1127	0.144	0.095	0.1512	0.0451	0.0701	0.0545	0.1684	0.1439	0.0751	0.0543	0.0651	0.0712	0.2521
IPO13	2492	AP	1			0	1	0.6016	0.0818	0.9287	0.9002	0.9702	0.8937	0.9308	0.9439	0.845	0.9765	0.8891	0.9206	0.8878	0.8849	0.9269	0.941	0.937	0.8961	0.849	0.8985	0.9463	0.8455	0.8498	0.9589	0.8877	0.83	0.7588	0.8409	0.8873	0.856	0.905	0.8488	0.9549	0.9299	0.9455	0.8316	0.8561	0.9249	0.9457	0.9349	0.9288	0.7479
DPH2	2496	ES	4	3.2	5	0	1	0.1019	0.0099	0.9841	1	0.994	1	1	1	0.9915	0.9935	0.9926	0.982	1	1	1	1	0.9894	0.9842	1	1	1	1	1	0.9747	1	1	1	1	1	1	1	1	0.9835	0.9855	1	1	1	1	1	0.982	1	0.9822
DPH2	2497	ES	3.1:3.2	2.1	4	0	0.9636	0.7034	0.1141	0.8362	0.8409	1	1	0.896		0.9263	1	0.9161	1	1		1	0.8803	1	1	1	0.6098	1	1	1	0.9496	0.6956	0.7638	0.8769	0.9648	0.8864	0.863	0.9363	0.9206	0.7584	0.8352	1	0.9323	0.8937	0.928	0.7169	1	0.8731	0.9585
DPH2	2498	ES	2.2:3.2	2.1	4	0	0.8873	0.8743	0.1611	0.8106	0.8155	1	1	0.8812		0.8373	1	0.9376		1	1	1	0.7983	1	1	1	0.6971	1	1	1	0.9042	0.5856	0.6043	0.8849	0.9195	0.8323	0.808	0.8241	0.8509	0.8417	0.7861	1	0.9134	0.8915	0.8656	0.7375	1	0.8107	0.9086
DPH2	2499	ES	3.2	2.1	4	0	1	0.4613	0.029	0.9614	0.9707	1	1	0.9822	1	0.9876	1	0.9887	1	1	1	1	0.9797	1	1	1	0.9013	1	1	1	0.9902	0.903	0.9521	0.9757	0.9893	0.958	0.9759	0.9915	0.9786	0.9776	0.9695	1	0.9614	0.9706	0.9764	0.9406	1	0.9714	0.9881
DPH2	2500	AA	3.1	2.1	3.2	0	0.9945	0.809	0.0887	0.1785	0.1427	0.1606	0.0902	0.1405	0.032	0.144	0.1757	0.1187	0.1558	0.0879	0.0358	0.1409	0.1409	0.1697	0.1063	0.1532	0.1502	0.0713	0.1294	0.1735	0.1654	0.2054	0.1514	0.1599	0.2372	0.2612	0.1427	0.1188	0.2117	0.0706	0.1443	0.1654	0.3729	0.2128	0.247	0.1468	0.1921	0.1787	0.2329
DPH2	2501	AD	2.2	2.1	3.2	0	0.9945	0.5203	0.0777	0.1589	0.1251	0.1097	0.0757	0.1268	0	0.0669	0.1504	0.1624	0.0371	0.0623	0.1635	0.0781	0.0846	0.0652	0.1182	0.1626	0.2099	0.0545	0.1045	0.1212	0.0939	0.1417	0.082	0.1766	0.1182	0.1866	0.1041	0.0428	0.1204	0.1174	0.1124	0.1064	0.3227	0.2151	0.1449	0.1666	0.1005	0.1241	0.1211
DPH2	2502	AD	1.3	1.2	2.1	0	0.9945	0.0363	0.0032	1	1	1	1	1	1	1	1	1	1	1	1	1	1	1	1	1	1	1	1	1	0.9878	1	1	1	1	1	1	0.9879	1	1	1	1	1	1	1	1	1	1	1
DPH2	2503	AD	1.2:1.3	1.1	2.1	0	1	0.2284	0.0375	0.8891	0.9423	0.9614	0.7716	0.9125	0.9686	0.9781	0.9414	0.9434	0.9017	0.9676	0.891	0.9547	0.9423	0.9561	0.9416	0.8566	0.9803	0.9215	0.9196	0.9215	0.9471	0.9041	0.8449	0.954	0.9454	0.9237	0.9277	0.9508	0.9069	0.9536	0.956	0.8769	0.9227	0.881	0.9218	0.9488	0.8016	0.9194	0.925
ATP6V0B	2505	AP	1.1			0	1	0.1601	0.0273	0.9792	1	0.9833	0.9268	0.9808	0.9443	0.9635	0.9878	0.9224	0.9927	0.9624	0.9332	0.9709	0.966	0.9787	0.9653	0.9586	0.9846	0.9743	0.9416	0.9686	0.9842	0.9529	0.9126	0.9895	0.9486	0.9938	0.9511	0.9793	0.9176	0.9688	0.9753	0.993	0.9827	0.9463	0.9643	0.9639	1	0.9368	0.9677
ATP6V0B	2506	AP	3.1			0	1	0.1601	0.0273	0.0208	0	0.0167	0.0732	0.0192	0.0557	0.0366	0.0122	0.0776	0.0073	0.0376	0.0668	0.0291	0.034	0.0213	0.0347	0.0414	0.0154	0.0257	0.0584	0.0314	0.0158	0.0471	0.0874	0.0105	0.0514	0.0062	0.0489	0.0207	0.0824	0.0312	0.0247	0.007	0.0173	0.0537	0.0357	0.0361	0	0.0632	0.0323
ATP6V0B	2509	RI	7.2	7.1	7.3	0	1	0.1776	0.0269	0.0605	0.0254	0.0651	0.0491	0.0252	0.0277	0.0356	0.026	0.0846	0.029	0.0472	0.054	0.039	0.0275	0.0225	0.0429	0.05	0.0377	0.0391	0.0402	0.0905	0.0452	0.0542	0.0668	0.0648	0.0571	0.0512	0.0427	0.0212	0.0684	0.0265	0.0658	0.0176	0.0143	0.0913	0.0592	0.052	0.0557	0.0553	0.0808
ATP6V0B	2510	ES	2.1:2.2	1.1	3.2	0	1	0.7489	0.1305	0.2197	0.1922	0.4692	0.2796	0.2361	0.2839	0.2761	0.2357	0.5072	0.2561	0.4642	0.4143	0.2119	0.2386	0.2772	0.3761	0.2613	0.2356	0.375	0.3453	0.4204	0.2585	0.1895	0.1919	0.5646	0.3858	0.3288	0.4012	0.1501	0.3346	0.2392	0.181	0.2087	0.1869	0.3379	0.3929	0.3268	0.361	0.2603	0.224
ATP6V0B	2511	ES	2.2	1.1	3.2	0	1	0.203	0.024	0.9111	0.8884	0.9564	0.9437	0.9626	0.9449	0.9554	0.9396	0.9557	0.9142	0.9646	0.957	0.9142	0.9558	0.9669	0.9611	0.949	0.9522	0.9625	0.9662	0.9573	0.9408	0.9317	0.9073	0.9665	0.9447	0.9533	0.9612	0.8668	0.9324	0.9562	0.8933	0.94	0.9291	0.9443	0.9591	0.9417	0.9686	0.9619	0.9086
ATP6V0B	2512	AD	1.2	1.1	3.2	0	0.9927	0.4248	0.0683	0.0438	0.0162	0.0574	0.0532	0.1743	0.0221	0.0397	0.0795	0.256	0.0678	0.0671	0	0	0.058	0.279	0.0748	0.0414	0.0834	0.1102	0	0	0.0688	0.0619	0.0275	0.0544	0.0733	0.0766	0	0	0.1435	0	0.0688	0.0324	0.0299	0	0	0	0.2723	0.1124	0.1336
ATP6V0B	2513	AA	2.1	1.1	2.2	0	1	0.1145	0.0159	0.0292	0.0325	0.0448	0.0256	0.0134	0.0257	0.0191	0.0216	0.052	0.0346	0.0333	0.0338	0.0277	0.0164	0.0141	0.0271	0.0211	0.0175	0.0259	0.0205	0.0356	0.0247	0.0191	0.027	0.0484	0.0404	0.0263	0.0288	0.03	0.0413	0.0154	0.0288	0.018	0.019	0.0323	0.0294	0.0316	0.0209	0.0154	0.0303
B4GALT2	2514	AP	2.1			0	0.9109	1	0.2388	0.0798	0.2065	0.611	0.7475	0.53		0.4481	0.7719	0.9384	0.6006			0.2836	0.4106	0.3395	0.3258	0.2528	0.1971	0.4501	0.5875	0.1447	0.2424	0.88	0.6874	0.5953	0.8664	0.2888	0.405	0.7654	0.7096	0.4441	0.585	0.3258	0.7205	0.5666	0.3098	0.3809	0.6828	0.5654	0.8024
B4GALT2	2515	AP	1			0	0.9109	1	0.2388	0.9202	0.7935	0.389	0.2525	0.47		0.5519	0.2281	0.0616	0.3994			0.7164	0.5894	0.6605	0.6742	0.7472	0.8029	0.5499	0.4125	0.8553	0.7576	0.12	0.3126	0.4047	0.1336	0.7112	0.595	0.2346	0.2904	0.5559	0.415	0.6742	0.2795	0.4334	0.6902	0.6191	0.3172	0.4346	0.1976
B4GALT2	2516	AA	4.1	3	4.2	0	0.9982	0.0176	0.0013	1	1	1	1	1	1	1	1	1	0.9933	1	1	1	1	1	1	1	1	1	1	1	1	0.9956	1	1	1	1	1	1	1	1	1	1	1	1	0.9954	1	1	1	1
B4GALT2	2517	AD	2.2	2.1	3	0	0.9782	0.7365	0.1242	1	1	0.7592	1	1		1	0.9012	0.8787	1	1		0.8787	0.7182	0.6552	1	1	0.5729	1	0.8446	1	1	0.9293	1	0.9194	1	0.5253	1	0.7497	1	0.7455	0.8493		0.8919	1	0.8631	1	0.801	0.801	0.9227
CCDC24	2518	AP	2			0	0.8745	0.8126	0.1328	0.3252	0.4577	0.4211	0.3252	0.5612	0.537	0.3912	0.3289	0.3331	0.4166	0.245	0.6941		0.3129	0.3139	0.6295	0.5449	0.4832		0.3985	0.4439	0.4675	0.2712	0.2788	0.2142	0.2539	0.2885	0.2891	0.2084	0.4901	0.5428	0.3179	0.335	0.3587	0.3139	0.3393	0.3319	0.335		0.322
CCDC24	2519	AP	3.1			0	0.8745	0.8536	0.1552	0.5086	0.2148	0.5174	0.5086	0.4388	0.28	0.4589	0.6431	0.521	0.2792	0.6779	0.2596		0.3671	0.4365	0.2121	0.2622	0.4619		0.4533	0.4493	0.5027	0.6363	0.4361	0.2931	0.2269	0.351	0.2512	0.5431	0.4509	0.4043	0.2487	0.4367	0.6413	0.4365	0.5307	0.6229	0.5716		0.5037
CCDC24	2520	AP	1			0	0.8745	0.9694	0.1516	0.1662	0.3275	0.0615	0.1662	0	0.183	0.15	0.028	0.1459	0.3042	0.0771	0.0463		0.3199	0.2496	0.1584	0.1928	0.0549		0.1482	0.1068	0.0299	0.0924	0.2851	0.4927	0.5192	0.3605	0.4597	0.2485	0.0589	0.0529	0.4334	0.2283	0	0.2496	0.1301	0.0452	0.0934		0.1743
CCDC24	2523	AA	8.1	7.3	8.2	0	0.9727	0.2864	0.0528	0.9799	0.9503	0.8791	0.9565	1	1	1	0.9248	0.933	0.9054	0.9081	0.9348	0.8644	0.9674	0.9725	0.8959	0.9074	0.9132	0.9348	0.8516	0.9702	0.9398	0.8627	0.8557	0.9327	0.9565	0.8516	0.8516	0.932	0.9565	0.9107	0.9132	0.9565	0.7928	0.9583	0.9368	0.9228	0.9273	1	0.9081
CCDC24	2524	RI	7.2	7.1	7.3	0	0.9873	0.3478	0.0523	0.0967	0.0432	0.1332	0	0.0792	0	0.1096	0.1459	0.0928	0.0925	0.0534	0.0517	0.0758	0.0514	0.093	0.0571	0.0486	0.0661	0.1597	0.049	0.0955	0.0734	0.2371	0.1014	0.1208	0.1775	0.0553	0.0986	0.0686	0.1351	0.0312	0.3478	0.0335	0.1487	0.2422	0.0722	0.1732	0.0911	0.1219	0.1724
CCDC24	2525	RI	6.3	6.2	6.4	0	1	0.7442	0.115	0.3179	0.3565	0.3705	0.2502	0.2434	0.3002	0.2955	0.2889	0.3324	0.3151	0.251	0.161	0.4838	0.2248	0.2348	0.2133	0.2552	0.2197	0.5694	0.4802	0.4791	0.3098	0.3614	0.3218	0.3176	0.4822	0.3886	0.4071	0.2351	0.4288	0.2904	0.5002	0.2173	0.2835	0.5267	0.3421	0.2109	0.2457	0.3417	0.4392
CCDC24	2526	AA	6.1	5	6.2	0	0.8745	0.7206	0.1203	0.3259	0.2602	0.381	0.4916	0.3495	0.6074	0.1621	0.3259	0.2872	0.5828	0.4916	0.2353	0.3767	0.1495	0.0606	0.2816	0.3559	0.2545		0.2711	0.4251	0.2249	0.1214	0.2438	0.3259	0.2789	0.1621	0.6394	0.2249	0.4129	0.2165		0.392	0.3259	0.3767	0.4129	0.3259	0.4037	0.6592	0.293
CCDC24	2527	ES	4.1:4.2:5:6.1	3.2	6.2	0	0.8964	0.7315	0.161	0.6442	0.7354	0.8494	0.8514	1	1		0.5962	0.951	0.8984	0.8126	1	0.6702	0.5703		1	0.9287	1		0.8518	1	1	0.6418	0.7727	0.9336	1	1	0.9144	0.3855	0.9325	0.7787	0.6777	1	0.896	1	0.918	0.8336	0.8551	1	1
CCDC24	2528	ES	4.2:5:6.1	3.2	6.2	0	0.8418	0.8278	0.2017	0.4387	0.8542	0.6969	0.8989	1	1		0.5916	0.9414	0.8867	0.7311	1	0.6587		1	1	0.91	1		0.8308	1	1	0.434	0.7469	0.7293	1	1	0.7017	0.6303	0.9048	0.8617	0.6507	1	0.7113	1	0.8805	0.504	0.8608	1	1
CCDC24	2530	ES	4.1:4.2:5	3.2	6.2	0	0.9891	0.5479	0.0923	0.7847	0.885	0.8992	0.8523	1	1	1	0.7483	0.9791	0.8604	0.8136	1	0.766	0.8802	1	1	0.9582	1	1	0.9377	1	1	0.9266	0.9113	0.9659	1	1	0.8544	0.6779	0.9503	0.9254	0.927	1	0.9455	1	0.9394	0.9098	0.8946	1	1
CCDC24	2531	ES	4.2:5	3.2	6.2	0	0.9691	0.7987	0.1429	0.6117	0.942	0.7846	0.8996	1	1	1	0.7449	0.9749	0.8452	0.7326	1	0.7569	0.6904	1	1	0.9469	1	1	0.9279	1	1	0.844	0.8992	0.8445	1	1	0.5639	0.8514	0.9294	0.9565	0.9185	1	0.8324	1	0.9108	0.672	0.899	1	1
CCDC24	2532	AA	4.1	3.2	4.2	0	0.9382	0.7506	0.1565	0.7293	0.3501	0.7268	0.4225	0.6148	0.5187	0.5828	0.5379	0.5828	0.5599	0.6423	0.4098	0.5449	0.7955	0.3866	0.5071	0.5848	0.6621	0.4892	0.5739	0.6336	0.6586	0.7293	0.5664	0.8599	0.6368	0.6804	0.8435	0.293	0.6202	0.3897	0.5739	0.4324	0.7996	0.8273	0.6336	0.8482	0.5187	0.6918	0.8164
SLC6A9	2533	AP	1			0	0.9455	0.3836	0.0394	0.954	0.9854	0.941	0.9501	0.8854	1		0.9779	0.9514	0.9823	0.9189	1	1	1	0.989	0.9718	1	1	0.927	0.8955	0.9611	0.9779	0.9574	1	0.9135	0.9861	1	0.9448	0.9825	0.8981	0.9212	0.9554	1	1	0.8511	0.9897	1	0.9626	0.9322	0.9514
SLC6A9	2534	AP	3			0	0.9455	0.3836	0.0296	0.0237	0.0146	0	0	0	0		0	0	0	0	0	0	0	0.011	0.011	0	0	0	0.1045	0	0.0221	0.0426	0	0	0.0139	0	0.0216	0.0175	0.0671	0.0386	0.0446	0	0	0.0836	0.0103	0	0.0146	0.0446	0
SLC6A9	2535	AP	4			0	0.9455	0.1953	0.026	0.0222	0	0.059	0.0499	0.1146	0		0.0221	0.0486	0.0177	0.0811	0	0	0	0	0.0172	0	0	0.073	0	0.0389	0	0	0	0.0865	0	0	0.0337	0	0.0349	0.0402	0	0	0	0.0652	0	0	0.0228	0.0232	0.0486
SLC6A9	2536	AT	16			0	1	0.267	0.0432	0.9078	0.8578	0.829	0.8792	0.913	0.8736	0.8407	0.891	0.8823	0.9214	0.832	0.8521	0.9342	0.9173	0.897	0.8073	0.826	0.8543	0.8867	0.8517	0.8272	0.8946	0.94	0.901	0.9169	0.9312	0.9013	0.9103	0.8809	0.8719	0.8385	0.8579	0.8216	0.903	0.8976	0.8719	0.8333	0.8885	0.8954	0.9051
SLC6A9	2538	AT	17			0	1	0.267	0.0432	0.0922	0.1422	0.171	0.1208	0.087	0.1264	0.1593	0.109	0.1177	0.0786	0.168	0.1479	0.0658	0.0827	0.103	0.1927	0.174	0.1457	0.1133	0.1483	0.1728	0.1054	0.06	0.099	0.0831	0.0688	0.0987	0.0897	0.1191	0.1281	0.1615	0.1421	0.1784	0.097	0.1024	0.1281	0.1667	0.1115	0.1046	0.0949
SLC6A9	2539	RI	14.3	14.2	14.4	0	0.9818	0.1111	0.0178	0.0276	0.0323	0	0.0566	0	0.0189	0	0	0.0189	0	0	0.0435	0.0154	0.0233	0.013	0.0222	0.0133	0.0286	0	0.027	0.027	0.0213	0.0833	0.0495	0.0551	0.0187	0	0.0318	0	0.0141	0	0.037	0	0.0345	0.0233	0.0248	0	0	0.012	0.0345
SLC6A9	2540	AA	14.1	13	14.2	0	0.98	0.1729	0.0256	0.9667	1	0.9348	1	1	1	0.8701	0.9803	1	1	1	1	0.8777	1	0.9782	0.962	1	1	1	0.9652	1	1	0.9613	0.9478	0.9751	0.9755	0.9387	0.955	1	0.9702	0.9768	1	1	1	0.9327	0.9658	1	1	1	1
SLC6A9	2542	ES	06:07:00	2	8	0	0.9891	0.2559	0.0272	0.9706	1	0.9059	1	0.8328	0.9625	1	1	1	0.9828	1	1	1	1	1	1	1	1	0.9573	1	1	1	1	1	0.985	0.9843	1	1	1	0.9618	0.9454	0.9814	1	1	0.9737	0.9781	1	0.9769	0.9799	1
SLC6A9	2544	ES	6	2	7	0	0.9891	0.2582	0.0303	1	0.9372	1	1	1	1	1	1	1	1	1	1	1	1	0.9822	1	1	1	1	0.9465	1	0.9779	1	1	1	0.9912	1	0.9898	0.9749	1	0.9885	1	1	1	0.9709	1	1	1	1	1
DMAP1	2545	RI	1.2:1.3	1.1	1.4	0	0.9964	0.699	0.1124	0.6347	0.8361	0.301	0.8003	0.9119	0.6185	0.9348	0.7498	0.8476	0.7515	0.804	0.5685	0.8765	0.7794	0.7602	0.6736	0.6307	0.5021	0.8328	0.8338	0.7196	0.7801	0.9206	1	0.7348	0.9395	0.7778	0.8571	0.602	0.8658	0.6651	0.7373	0.741	0.8203	0.8191	0.8253	0.9149	0.7391	0.8317	0.8924
DMAP1	2546	AA	1.3	1.1	1.4	0	0.9945	0.3462	0.0643	0.8001	0.9395	0.7164	0.8896	0.9294	0.8308	0.9654	0.8583	0.9383	0.902	0.9183	0.7825	0.9382	0.9179	0.8067	0.8899	0.8363	0.8499	0.9143	0.91	0.8426	0.8701	0.9494	1	0.6639	0.9379	0.8851	0.933	0.7905	0.8921	0.831	0.8309	0.8851	0.8274	0.8709	0.9038	0.9399	0.8502	0.8659	0.963
DMAP1	2547	RI	1.2	1.1	1.3	0	0.9964	0.5668	0.1034	0.3037	0.2533	0.1378	0.3255	0.4477	0.2465	0.3436	0.3436	0.2878	0.2398	0.274	0.27	0.3162	0.2302	0.447	0.2114	0.2751	0.1505	0.3313	0.3403	0.3324	0.3401	0.3917	0.4768	0.5864	0.5206	0.3262	0.2984	0.3075	0.4389	0.2951	0.3673	0.2518	0.51	0.4097	0.3377	0.4121	0.3348	0.4389	0.2356
ERI3	2548	AP	1			0	1	0.1896	0.024	0.9845	1	0.9846	1	0.9702	0.9757	0.9661	0.9865	0.9791	1	0.9788	0.9809	0.9846	0.9791	0.976	0.9682	1	0.9687	1	0.9385	0.9671	0.9707	0.9722	0.977	0.9438	0.9536	0.9904	0.9946	0.9757	0.9472	0.9924	0.966	0.9763	0.9866	1	0.9742	0.9934	1	0.9484	0.9862
ERI3	2549	AP	2.1			0	1	0	0	0	0	0	0	0	0	0	0	0	0	0	0	0	0	0	0	0	0	0	0	0	0	0	0	0	0	0	0	0	0	0	0	0	0	0	0	0	0	0	0
ERI3	2550	AP	4			0	1	0.1896	0.024	0.0155	0	0.0154	0	0.0298	0.0243	0.0339	0.0135	0.0209	0	0.0212	0.0191	0.0154	0.0209	0.024	0.0318	0	0.0313	0	0.0615	0.0329	0.0293	0.0278	0.023	0.0562	0.0464	0.0096	0.0054	0.0243	0.0528	0.0076	0.034	0.0237	0.0134	0	0.0258	0.0066	0	0.0516	0.0138
ERI3	2551	ES	9	8	10	1	0.8455	0.097	0.0156	0.9597	0.971	0.9627	0.968	0.9696	0.9743		0.9576	0.9635	0.9716	0.9593	0.9724	0.9563	0.9745	0.9722	0.9762	0.9663	0.97		0.9706	0.9399	0.9694	0.9597	0.9594	0.9403	0.9588	0.9637		0.9785	0.9301		0.9696		0.9617	0.9433	0.9685		0.9771
ERI3	2552	ES	3	2.2	5	0	1	0.2571	0.0211	0.9743	0.9745	0.9822	0.9914	0.9693	0.9622	0.9636	1	0.98	0.9775	0.9487	0.9729	0.9483	0.9777	0.9685	0.9469	0.9429	0.9803	0.9824	0.9849	0.9443	1	0.9669	0.9563	0.9795	0.9861	0.9469	0.9728	0.8843	0.9792	0.9849	0.9761	0.9904	0.9515	0.9488	0.9701	0.9874	0.9831	0.9809	0.9602
RNF220	2553	AP	3			0	0.9982	0.4638	0.066	0	0.0521	0	0	0	0.0279	0	0	0	0.055	0	0.0477	0	0	0	0.0098	0	0	0	0.0157	0.0147	0	0	0	0.0158	0.2011	0	0.0174	0	0.0766	0.0093	0	0.0178	0	0.0751	0	0.2942	0	0.0295	0.0158
RNF220	2554	AP	1.1			0	0.9982	0.7464	0.0795	0	0	0.0456	0	0	0.0319	0.0091	0.0584	0	0.0525	0	0.0091	0	0	0	0.0038	0.0174	0.0055	0.0443	0.0659	0.0561	0.1393	0	0.0094	0.0181	0.2048	0.0257	0.0664	0.015	0.0994	0.0782	0	0.0136	0	0.0057	0	0.2127	0.0478	0.0282	0.012
RNF220	2555	AP	7			0	0.9982	0.7535	0.12	1	0.9479	0.9544	1	1	0.9402	0.9909	0.9416	1	0.8924	1	0.9432	1	1	1	0.9864	0.9826	0.9945	0.9557	0.9184	0.9292	0.8607	1	0.9906	0.9661	0.594	0.9743	0.9163	0.985	0.824	0.9125	1	0.9686	1	0.9192	1	0.4932	0.9522	0.9423	0.9722
RNF220	2557	AT	10.2			0	1	0.2484	0.0378	0.2055	0.2072	0.0862	0.1292	0.1399	0.1673	0.121	0.085	0.0711	0.0991	0.0691	0.1403	0.0835	0.057	0.0656	0.1302	0.1437	0.1102	0.098	0.1163	0.1455	0.0883	0.1107	0.1035	0.0786	0.0929	0.1473	0.0826	0.1298	0.1579	0.0862	0.1653	0.151	0.1246	0.0839	0.0778	0.0979	0.0826	0.1231	0.153
RNF220	2558	AT	17			0	1	0.2484	0.0378	0.7945	0.7928	0.9138	0.8708	0.8601	0.8327	0.879	0.915	0.9289	0.9009	0.9309	0.8597	0.9165	0.943	0.9344	0.8698	0.8563	0.8898	0.902	0.8837	0.8545	0.9117	0.8893	0.8965	0.9214	0.9071	0.8527	0.9174	0.8702	0.8421	0.9138	0.8347	0.849	0.8754	0.9161	0.9222	0.9021	0.9174	0.8769	0.847
RNF220	2559	AD	9.2	9.1	10.1	0	1	0.6082	0.0782	0.4784	0.605	0.4021	0.4726	0.5936	0.547	0.5628	0.3043	0.4386	0.5657	0.4742	0.5494	0.3393	0.443	0.5747	0.4859	0.5178	0.426	0.4164	0.3997	0.4674	0.5146	0.3564	0.6447	0.7394	0.5607	0.5178	0.5087	0.4226	0.5643	0.5108	0.6473	0.499	0.6645	0.4277	0.3319	0.5303	0.511	0.436	0.4978
TMEM53	2561	AT	5			0	1	0.5253	0.0862	0.6669	0.4112	0.4898	0.3244	0.4409	0.4225	0.4004	0.3563	0.3803	0.3874	0.3351	0.3148	0.4087	0.4603	0.3289	0.3257	0.3371	0.5416	0.434	0.3818	0.4827	0.3262	0.4659	0.6113	0.5702	0.4356	0.4847	0.3919	0.5159	0.5357	0.4511	0.4667	0.3189	0.4132	0.5342	0.4916	0.5212	0.3478	0.378	0.5177
TMEM53	2562	AT	3.3			0	1	0.5253	0.0862	0.3331	0.5888	0.5102	0.6756	0.5591	0.5775	0.5996	0.6437	0.6197	0.6126	0.6649	0.6852	0.5913	0.5397	0.6711	0.6743	0.6629	0.4584	0.566	0.6182	0.5173	0.6738	0.5341	0.3887	0.4298	0.5644	0.5153	0.6081	0.4841	0.4643	0.5489	0.5333	0.6811	0.5868	0.4658	0.5084	0.4788	0.6522	0.622	0.4823
TMEM53	2563	AA	3.1	2	3.2	0	0.9982	0.4995	0.0862	0.6899	0.7137	0.9596	0.8215	0.7838	0.7078	0.6445	0.9663	0.8718	0.9207	0.8753	0.8343	1	0.8878	0.8676	0.7954	0.9351	0.8447	0.8122	0.9326	0.9679	0.781	0.6594	0.7579	0.6526	0.8835	0.7932	0.712	0.8399	0.8194	0.8122	0.8188	0.8724	0.9468	0.8206	0.7685	0.7141	0.8718	0.8973	0.8137
TMEM53	2568	ES	2	1	4	0	0.8764	0.665	0.1043	0.8943	1	0.9213	1	0.8616	0.8394	1			0.6962	0.8898	0.8863			1	0.948	0.9508	0.7188	1	1	0.7349	1	1	1	1	0.7263	0.8569	1	1	0.8689	0.9491	0.9323	0.849	1	1	0.8131	0.9156	1	0.8678	0.8821
KIF2C	2573	AP	3.1			0	0.9455	0.1511	0.0116	0		0.0093		0		0	0	0	0	0		0	0	0			0	0	0	0	0	0	0.0173	0	0	0.054	0	0	0	0	0		0	0.0158	0	0	0	0	0
KIF2C	2574	AP	1			0	0.9455	0.1511	0.0116	1		0.9907		1		1	1	1	1	1		1	1	1			1	1	1	1	1	1	0.9827	1	1	0.946	1	1	1	1	1		1	0.9842	1	1	1	1	1
KIF2C	2575	ES	7	6	8	0	0.9618	0.3504	0.0384	0.9588		0.9167	0.7449	1		1	0.9515	0.9835	0.9359	0.9806		0.9438	0.889	1			1	0.9819	0.9735	1	0.9847	0.9675	1	0.9327	0.9828	1	1	0.9485	1	0.9411	0.9787		1	0.877	0.9479	0.9444	0.9649	0.9816	0.9934
RPS8	2577	AD	3.2	3.1	4	0	1	0.0173	0.0022	0.9933	0.9943	0.9929	0.9926	0.9969	0.9938	0.994	0.9958	0.9902	0.9942	0.9937	0.9966	0.9933	0.9917	0.9934	0.9945	0.994	0.995	0.9972	0.9969	0.9932	0.996	0.993	0.9922	0.9962	0.9928	0.9918	0.9954	0.9925	0.9944	0.9924	0.9955	0.9951	0.9947	0.9936	0.9928	0.9912	0.9919	0.9919	0.9912
PLK3	2578	ES	13	12	14	1	0.9018	0.4966	0.0736	0.8677	0.784	0.7708	0.848	0.9012	0.7907	0.8399	0.8614	0.8148	0.918	0.9221	0.8945	0.885		0.9317	0.8133	0.8659	0.8982	0.7743		0.895	0.879	0.7438	0.8478		0.8703	0.916	0.8506	0.8023	0.8083	0.8778	0.8723	0.7419	0.8977	0.7755	0.8508	0.8215	0.7499	0.8971	0.841
BTBD19	2581	AT	7.2			0	0.9273	0.5678	0.0456	0	0.0694	0	0	0.1314	0	0	0.2532	0	0	0	0	0	0	0	0	0.0764	0	0	0	0.0751	0.1737	0	0	0	0.1655	0	0.1112	0	0	0	0	0	0	0	0	0	0.5678	0	0
BTBD19	2582	AT	9			0	0.9273	0.5678	0.0456	1	0.9306	1	1	0.8686	1	1	0.7468	1	1	1	1	1	1	1	1	0.9236	1	1	1	0.9249	0.8263	1	1	1	0.8345	1	0.8888	1	1	1	1	1	1	1	1	1	0.4322	1	1
PTCH2	2586	AT	22.2			0	0.9709	0.8196	0.0789	0.9602	0.792	0.9664	1	0.7312	0.7174	0.9195	0.9467	0.9602	1	0.8436	0.9654	0.8988	0.9152	0.792	0.8354	0.8877	1	0.954	0.8283	0.8839	1	0.9449	0.9292	0.9876	0.9729	0.9322	0.9038	1	0.9744	0.9049	0.9602	0.9317	0.9211	0.9858	0.9836	1	0.9763	1	0.9258
PTCH2	2587	AT	23			0	0.9709	0.8196	0.0789	0.0398	0.208	0.0336	0	0.2688	0.2826	0.0805	0.0533	0.0398	0	0.1564	0.0346	0.1012	0.0848	0.208	0.1646	0.1123	0	0.046	0.1717	0.1161	0	0.0551	0.0708	0.0124	0.0271	0.0678	0.0962	0	0.0256	0.0951	0.0398	0.0683	0.0789	0.0142	0.0164	0	0.0237	0	0.0742
EIF2B3	2588	AT	10.2			0	1	0.3603	0.0602	0.0945	0.0826	0.1891	0.1511	0.393	0.1366	0.1205	0.1385	0.2532	0.2691	0.1525	0.1242	0.1437	0.1675	0.0785	0.0861	0.0512	0.2056	0.2169	0.1488	0.1638	0.1328	0.1062	0.2624	0.0944	0.1522	0.2347	0.3144	0.1452	0.1232	0.1066	0.109	0.1216	0.1814	0.0983	0.0619	0.166	0.2293	0.1378	0.131
EIF2B3	2589	AT	12			0	1	0.3603	0.0602	0.9055	0.9174	0.8109	0.8489	0.607	0.8634	0.8795	0.8615	0.7468	0.7309	0.8475	0.8758	0.8563	0.8325	0.9215	0.9139	0.9488	0.7944	0.7831	0.8512	0.8362	0.8672	0.8938	0.7376	0.9056	0.8478	0.7653	0.6856	0.8548	0.8768	0.8934	0.891	0.8784	0.8186	0.9017	0.9381	0.834	0.7707	0.8622	0.869
HECTD3	2592	RI	8.2	8.1	8.3	0	0.9945	0.3028	0.0484	0.0778	0.0564	0.0642	0.0321	0.0859	0.0913	0.0704	0.0473	0.0804	0.0512	0.0754	0.0389	0.012	0.0476	0.0188	0.0753	0.1159	0.0951	0.1141	0.0652	0.0943	0.0185	0.1044	0.0999	0.0624	0.0993	0.1499	0.0499	0	0.111	0.04	0.0772	0.0185	0.1978	0.0736	0.0325	0.0283	0.0949	0.0797	0.0679
MUTYH	2593	AP	3			0	1	0.5562	0.1165	0.1475	0.0537	0.2292	0.0337	0.1156	0.0721	0.2078	0.2195	0.2053	0.4083	0.2251	0.0592	0.156	0.3053	0.3918	0.0255	0.0724	0.1168	0.2151	0.2807	0.2702	0.2778	0.197	0.4631	0.2717	0.1256	0.1066	0.253	0.4589	0.1793	0.1933	0.2058	0.0835	0.2189	0.2501	0.3008	0.345	0.1724	0.2497	0.2902
MUTYH	2594	AP	2			0	1	0.4594	0.0685	0.454	0.1389	0.2531	0.2034	0.2989	0.1243	0.2538	0.2366	0.188	0.1354	0.2426	0.2807	0.3698	0.3027	0.2111	0.1981	0.2184	0.2518	0.3178	0.1694	0.2329	0.2155	0.1091	0.1569	0.1317	0.2166	0.2451	0.2272	0.1978	0.1545	0.2188	0.2281	0.324	0.2358	0.1677	0.2004	0.3346	0.3269	0.1937	0.2428
MUTYH	2595	AP	1.1			0	1	0.678	0.1201	0.3985	0.8074	0.5177	0.7629	0.5856	0.8036	0.5383	0.5439	0.6067	0.4563	0.5323	0.6601	0.4743	0.392	0.3971	0.7764	0.7092	0.6314	0.4671	0.55	0.4969	0.5067	0.6939	0.38	0.5966	0.6578	0.6483	0.5199	0.3433	0.6662	0.5879	0.5661	0.5925	0.5453	0.5821	0.4988	0.3205	0.5008	0.5567	0.4671
MUTYH	2600	ES	11:12:13:14:15	10	16	0	0.9982	0.15	0.0153	0.9771	0.9468	1	0.9642	1	1	1	0.9846	1	1	1	0.9776	1	0.9758	1	1	1	1	1	0.9761	1	1	0.9907	0.9626	0.9751	1	1	0.9818	1	0.9859	1	1	1	1	1	1	0.9493	1	1	1
MUTYH	2601	ES	08:09:00	7	10	0	1	0.174	0.019	0.9444	1	0.9897	0.9768	1	1	1	1	1	1	0.9799	1	0.955	1	1	1	1	0.9679	0.9563	1	1	1	1	0.9631	0.9501	0.9787	1	0.9743	1	0.9768	0.9786	1	1	0.9788	1	1	1	0.9483	1	1
MUTYH	2603	ES	8	7	9	0	1	0.1093	0.0179	0.9811	1	1	1	1	1	1	0.9802	1	1	1	1	0.9512	1	1	1	1	1	0.9309	0.9697	1	0.9828	1	0.9663	0.9501	1	1	0.974	1	1	0.9787	0.9785	1	0.9789	1	1	1	0.9485	1	1
MUTYH	2607	ES	6.2:6.3:6.4:6.5	5	7	0	0.7764	0.7134	0.1138	0.9211	0.768	1		1		1	1	1	1	0.8517	1	0.6838	0.8924	1	1	1		1	0.8742		1	0.8156	0.8103				1	1	1	1	1	1		0.8091	1		1		0.9067
MUTYH	2608	ES	6.3:6.4:6.5	5	7	0	0.8455	0.4349	0.0896	0.9243	0.8851	1	1	1		1	1	1	1	0.8533	1	0.7601	0.823	1	1	1			0.8679	1	1	0.946	0.5651	1	1	1	1	1	1		1	1	0.8608	0.9213	1	0.8487	1	1	0.9587
MUTYH	2609	ES	6.4:6.5	5	7	0	0.9982	0.3116	0.0316	0.9651	0.9413	1	1	1	1	1	1	1	1	0.9659	1	0.6884	0.9764	1	1	1	1	1	0.9229	1	1	0.9646	0.89	1	1	1	1	1	1	1	1	1	0.9682	0.9504	1	0.9512	1	1	0.9832
MUTYH	2612	ES	6.2:6.3:6.4:6.5:7:8:9:10:11:12:13:14:15:16:17:18	5	19	0	0.8927	0.6603	0.0959	1	1	0.9495		1		1	1	1	1	1	1	1	1	0.7834	1	1		0.9056	1	1	1	0.8753	1		1	1	1	1	1	1	1	1		1	1		1	1	1
MUTYH	2613	ES	6.3:6.4:6.5:7:8:9:10:11:12:13:14:15:16:17:18	5	19	0	0.9491	0.6102	0.0766	1	1	0.9482	1	1	1	1	1	1	1	1	1	1	1	0.9377	1	1	1	0.7433	1	1	1	0.966	1	1	1	1	1	1	1	1	1	1	0.8286	1	1	1	1	1	1
MUTYH	2614	ES	6.4:6.5:7:8:9:10:11:12:13:14:15:16:17:18	5	19	0	1	0.1239	0.0184	1	1	0.9901	1	1	1	1	1	1	1	1	1	1	1	0.9711	1	1	1	0.9575	1	1	1	0.9779	1	1	1	1	1	1	1	1	1	1	0.9598	1	1	1	1	1	1
MUTYH	2615	ES	6.5:7:8:9:10:11:12:13:14:15:16:17:18	5	19	0	0.8727	0.6893	0.1091	1	1	0.9176	1	1	1	1	1	1		1	1	1	1	0.6661	1	1	1	0.8993	1	1	1	0.809	1	1	1	1	1	1	1	1	1		0.8951	1	1		1	1	1
MUTYH	2650	ES	6.2:6.3:6.4:6.5:7:8:9	5	10	0	0.8418	0.6881	0.1337	0.9119	0.5257	1		1		1	1	0.9018	1	0.8646	1	0.6952	1	1	1	1		1	1		1	0.4919	1		1	1	1	0.7779	1	1	1	1		1	0.4966		1		1
MUTYH	2651	ES	6.3:6.4:6.5:7:8:9	5	10	0	0.9309	0.6214	0.114	0.916	0.72	1	1	1	0.6071	1	1	0.9182	1	0.867	1	0.773	1	1	1	1	1	1	1	1	1	0.794	1	1	1	1	1	0.933	1		1	1	1	1	0.8316	0.4961	1	0.7955	1
MUTYH	2652	ES	6.4:6.5:7:8:9	5	10	0	1	0.2959	0.0363	0.9611	0.8424	1	1	1	0.8782	1	1	0.9775	1	0.9695	1	0.7041	1	1	1	1	1	1	1	1	1	0.8571	1	1	1	1	1	0.9541	1	1	1	1	1	1	0.9169	0.7737	1	0.9634	1
MUTYH	2671	AA	6.4	5	6.5	0	0.9855	0.4847	0.0873	0.8103	0.9264	0.9103	0.8579	0.9034	0.8998	0.879	0.9359	0.8565	1	0.9485	0.7072		0.9399	0.9501	0.9217	0.7919	0.8101	0.7484	0.9082	0.6904	0.9003	0.9204	0.7821	0.8543	0.8729	0.6988	0.905	0.7852	0.6987	0.8232	0.8462	1	0.7713	0.7186	0.8487	1	0.8951	0.8066	0.8765
MUTYH	2672	AA	6.1:6.2:6.3	5	6.4	0	0.9091	0.4638	0.0859	0.1215	0	0.0668	0.1947		0.311	0.0421	0.056	0	0	0.1179			0.0637	0.1719	0.0809	0.0996	0.2529	0.2082		0.3912	0.0877	0.228	0	0.078	0.1873	0.1583	0	0.142	0.1558	0	0.0921		0.0966	0.1734	0.0432	0.2131	0.0426	0.0495	0.1373
MUTYH	2673	AA	6.2:6.3	5	6.4	0	0.9327	0.5378	0.102	0.3183	0.1791	0.1668	0	0.3265	0	0.1633	0.2085	0.1829	0.3349	0.1803	0.2936		0.1846	0.1042	0.1641	0.1966		0.3079	0.384	0.1053	0.0982	0.1436	0.3529	0	0.0602	0.1681	0.3217	0.1567	0.1655	0.2113	0.1011	0.3419	0	0.1919	0.0884	0	0.2522	0.053	0.1527
MUTYH	2674	AA	6.3	5	6.4	0	0.9255	0.5923	0.0945	0.3086	0.3259	0.1555	0.1214	0.3259	0.1769	0.1769	0.2529	0.2066	0.2711	0.1717	0.293		0.1021	0.311	0.1621	0.2789		0.1142	0.3559	0.3495	0.2872	0.392	0.1388	0.2973	0.2438	0.4622	0.2517	0.4037	0.3053	0.0484	0.112	0.2165	0.1691	0.381	0.311	0.2249	0.2214	0.1295	0.2858
TOE1	2677	ES	4	3	5	0	1	0.1668	0.023	0.9724	1	1	0.97	1	1	0.9252	0.9563	1	1	1	1	1	0.9324	1	1	1	1	0.9744	1	1	1	0.9302	1	1	1	1	0.9811	0.9764	1	0.9672	1	1	1	0.9781	1	0.9656	0.9604	1	1
TOE1	2678	ES	2	1	3	0	1	0.1273	0.0147	0.9734	1	1	1	1	1	1	1	1	1	1	1	0.9519	1	0.9283	0.9799	1	1	1	1	1	1	1	1	1	1	1	1	1	1	1	1	1	1	0.9749	1	0.9653	1	1	1
TESK2	2681	AT	5			0	1	0.2897	0.0439	0.0547	0.0451	0.0262	0	0.0857	0.0305	0.047	0	0.0421	0.0191	0.0446	0	0	0.0249	0.0427	0.018	0	0.0127	0.0536	0.0315	0	0.0467	0.0504	0.0245	0.0128	0.0377	0	0.0506	0.0361	0.0181	0.0926	0.1206	0.054	0.1494	0.0806	0.0146	0.0354	0.0258	0.0334	0.0945
TESK2	2682	AT	13			0	1	0.2897	0.0439	0.9453	0.9549	0.9738	1	0.9143	0.9695	0.953	1	0.9579	0.9809	0.9554	1	1	0.9751	0.9573	0.982	1	0.9873	0.9464	0.9685	1	0.9533	0.9496	0.9755	0.9872	0.9623	1	0.9494	0.9639	0.9819	0.9074	0.8794	0.946	0.8506	0.9194	0.9854	0.9646	0.9742	0.9666	0.9055
TESK2	2683	ES	11	10	12	0	0.9818	0.2212	0.0213	1	1	1	1	1	1	1	1	1	1	1	1	1	1	1	0.9558	1	1	1	0.9358	0.9351	1	0.9818	1	1	1	1	0.9876	1	0.9397	1	1	1	1	1	1	1	1	1	1
TESK2	2684	ES	2	1	3	0	0.9982	0.2308	0.0296	0.9606	1	0.9569	1	0.9353	1	0.9716	1	0.948	0.9529	1	1	0.8916	1	1	0.9274	1	1	1	1	1	1	1	1	1	1	0.9333	0.9863	1	1	1	1	1	1	1	0.9726	1	1	0.9474	0.9503
CCDC163P	2685	AT	6			0	1	0.1557	0.0274	0.968	1	0.9792	1	1	0.9583	0.9776	0.9643	0.9895	0.9677	0.9837	0.9077	1	1	0.9225	0.9893	0.9819	1	0.9382	0.9067	0.9767	1	0.968	0.9767	0.9891	0.9785	0.9839	0.9808	0.9779	0.9511	0.9341	0.9678	0.9667	1	0.9637	0.9864	1	1	0.9176	0.9485
CCDC163P	2686	AT	4.2			0	1	0.1557	0.0274	0.032	0	0.0208	0	0	0.0417	0.0224	0.0357	0.0105	0.0323	0.0163	0.0923	0	0	0.0775	0.0107	0.0181	0	0.0618	0.0933	0.0233	0	0.032	0.0233	0.0109	0.0215	0.0161	0.0192	0.0221	0.0489	0.0659	0.0322	0.0333	0	0.0363	0.0136	0	0	0.0824	0.0515
CCDC163P	2688	ES	5.1:5.2	4.1	6	0	0.7982	0.7105	0.1577	0.6471		0.8943	0.8975	0.5878		1		0.9155	0.6471	0.449		0.7857		0.8618	0.868	1	1		0.8445	0.9579	0.2895	0.449	0.55	0.9393	0.5207	0.7228			0.8155	0.7404	0.8202		0.8953	0.9685	0.8645	0.8693			1
PRDX1	2693	ES	2.2:3:4.1	2.1	4.2	0	1	0.0131	0.0021	0.993	0.9915	0.9926	0.9908	0.9899	0.9901	0.9917	0.9917	0.9909	0.9912	0.9908	0.99	0.9928	0.993	0.9957	0.9903	0.9903	0.9957	0.9895	0.9941	0.9949	0.9937	0.9948	0.9955	0.9936	0.9931	0.9928	0.9924	0.993	0.9922	0.9932	0.9904	0.989	0.9913	0.9917	0.9892	0.9904	0.9924	0.9906	0.9961
PRDX1	2694	AD	1.2	1.1	2.1	0	1	0.0285	0.0047	0.0108	0.0092	0.0161	0.0054	0.0173	0.0042	0.0096	0.0258	0.0094	0.0144	0.0079	0.0064	0.011	0.0139	0.0112	0.0082	0.006	0.0122	0.0082	0.0104	0.0157	0.0087	0.0102	0.0095	0.009	0.0087	0.011	0.011	0.0144	0.0109	0.0184	0.0095	0.005	0.0136	0.0166	0.0162	0.0237	0.0107	0.0142	0.0121
AKR1A1	2695	AT	5.2			0	1	0.2458	0.0458	0.1188	0.0442	0.1424	0.0494	0.0686	0.0327	0.0742	0.1379	0.1028	0.0949	0.0691	0.0517	0.1166	0.0788	0.0774	0.0587	0.0671	0.1404	0.1022	0.1458	0.1024	0.1118	0.1145	0.1329	0.0854	0.1195	0.1003	0.1546	0.1168	0.1227	0.0982	0.0891	0.0476	0.0896	0.1756	0.1213	0.1295	0.1286	0.0861	0.1112
AKR1A1	2696	AT	10			0	1	0.2458	0.0458	0.8812	0.9558	0.8576	0.9506	0.9314	0.9673	0.9258	0.8621	0.8972	0.9051	0.9309	0.9483	0.8834	0.9212	0.9226	0.9413	0.9329	0.8596	0.8978	0.8542	0.8976	0.8882	0.8855	0.8671	0.9146	0.8805	0.8997	0.8454	0.8832	0.8773	0.9018	0.9109	0.9524	0.9104	0.8244	0.8787	0.8705	0.8714	0.9139	0.8888
AKR1A1	2697	ES	7	6	8	1	0.9745	0.2884	0.0488	0.8818	0.9467	0.8871	0.9505	0.9289	0.9462	0.9458	0.8734	0.9179	0.9607	0.9234		0.8824	0.8996	0.952	0.9553	0.9538	0.8757	0.9418	0.918	0.8835	0.8794	0.8534	0.9046	0.9565	0.8837	0.8917	0.8973	0.8073	0.9203	0.9024	0.9437		0.8944	0.8537	0.9104	0.8441	0.9123	0.902	0.9151
AKR1A1	2698	ES	2	1	3	0	1	0.5041	0.068	0.3071	0.3272	0.3842	0.4185	0.3924	0.416	0.3614	0.3616	0.313	0.3169	0.4169	0.3928	0.4607	0.3946	0.2645	0.4762	0.4929	0.3783	0.3627	0.5961	0.3731	0.3575	0.457	0.3527	0.4933	0.3802	0.4189	0.3702	0.5066	0.4362	0.3724	0.4411	0.458	0.4072	0.4953	0.4365	0.4078	0.381	0.3624	0.516
NASP	2706	ES	9	8	10	0	1	0.851	0.1648	0.6964	0.4444	0.7842	0.4485	0.4965	0.4081	0.2851	0.7484	0.5538	0.2869	0.4256	0.3524	0.6655	0.475	0.4	0.3181	0.3346	0.6799	0.6062	0.3315	0.3141	0.5197	0.3468	0.6023	0.4605	0.5314	0.5164	0.7105	0.582	0.2433	0.8095	0.7233	0.4388	0.1432	0.9198	0.6906	0.2846	0.6069	0.5566	0.3315
NASP	2708	ES	7.2	6	8	0	1	0.008	0.0009	1	1	0.9981	1	1	0.9928	1	1	1	1	1	0.993	1	1	1	1	1	1	1	1	1	1	1	1	1	0.998	1	1	1	1	1	1	1	1	1	1	1	1	1	1
NASP	2709	AA	7.1	6	7.2	0	1	0.0163	0.0026	0.0073	0.012	0	0	0	0	0	0	0.0017	0	0	0	0	0.004	0	0	0.0073	0	0	0	0	0	0.0025	0	0	0	0	0.0094	0	0	0	0.0033	0	0	0.003	0	0.0083	0	0.0049	0
NASP	2717	ES	00:06:07.200000	3	8	0	0.9964	0.5088	0.0397	1	1	1	1	0.9722	1	0.9186	1	0.9616	0.9484	0.9614	1	0.9448	1	1	0.9476	1	1	1	1	1	1	0.9693	1	0.9333	0.9728	1	1	1	1	0.9762	0.9647	1	0.8975	0.9701	0.9692	0.9577	1	1	1
NASP	2719	ES	00:06:07.200000	3	8	0	1	0.0386	0.003	1	1	1	1	0.9962	1	0.9936	1	0.9968	0.9946	0.9971	1	0.9947	1	1	0.9953	1	1	1	1	1	1	0.9954	1	0.9961	0.998	1	1	1	1	0.9973	0.9971	1	0.9911	0.9972	0.9958	0.9976	1	1	1
NASP	2729	ES	5:6:7.2:8:9	3	10	0	0.9964	0.6486	0.0968	1	1	0.9671	1	0.9294	1	0.8632	1	0.921	1	1	0.8157	1	1	1	1	1	1	1	1	0.8436	1	1	0.9249	0.8217	1	0.8986	1	1	1	1	1	1	0.406	1	1	1	1	1	1
NASP	2731	ES	6:7.2:8:9	3	10	0	1	0.1617	0.0138	1	1	0.9976	1	0.9902	1	0.989	1	0.9934	1	1	0.972	1	1	1	1	1	1	1	1	0.9775	1	1	0.9931	0.9887	1	0.9851	1	1	1	1	1	1	0.8995	1	1	1	1	1	1
NASP	2742	ES	5:6:7.2:8	3	10	0	0.9945	0.3418	0.0423	1	1	0.9439	1	0.9629	1	0.9694	1	0.9495	1	1	0.9329	1	1	1	1	1	1	1	1	0.9624	1	1	0.9477	0.9218	1	0.9391	1	1	1	1	1	1	0.8999	1	1	1	1	1	1
NASP	2744	ES	00:07:02.200000	3	10	0	1	0.0515	0.0043	1	1	0.9957	1	0.995	1	0.9978	1	0.9959	1	1	0.9908	1	1	1	1	1	1	1	1	0.9951	1	1	0.9953	0.9955	1	0.9912	1	1	1	1	1	1	0.9915	1	1	1	1	1	1
NASP	2751	ES	04:05:00	3	6	0	1	0.0832	0.0082	0	0	0.0058	0	0.0176	0	0.0032	0.0065	0	0.0182	0.005	0	0.0239	0	0	0.0141	0	0.0453	0.0222	0.0118	0	0.006	0.0046	0.0061	0.021	0	0.0147	0	0	0.0096	0.0105	0	0.0058	0.0075	0.0239	0	0	0	0	0.0034
NASP	2752	ES	5	3	6	0	1	0.3304	0.0421	0.0981	0.1995	0.0814	0.1517	0.1356	0.1043	0.0802	0.0639	0.0878	0.1077	0.0803	0.1351	0.1023	0.1251	0.0746	0.0928	0.0707	0.0616	0.1626	0.2406	0.1338	0.0711	0.149	0.0926	0.0632	0.0798	0.1378	0.0653	0.1332	0.0627	0.1147	0.0876	0.1441	0.0873	0.0997	0.1385	0.062	0.1054	0.1116	0.1065
NASP	2753	ES	4	3	6	0	1	0.0951	0.0118	0.0431	0.0299	0.0335	0.0367	0	0.0412	0.0026	0.0053	0.0078	0.0128	0.0035	0.0361	0.015	0.008	0.0085	0.0136	0.0066	0.0601	0.0135	0.0106	0.0168	0.0045	0.0033	0.0179	0.0177	0.0222	0.0138	0.0409	0.0161	0.0075	0.0164	0.0105	0.0048	0.0057	0.0365	0.0102	0.0086	0.0177	0.0349	0.0059
NASP	2754	ES	2	1	3	0	1	0.747	0.096	0.3643	0.4815	0.3172	0.4481	0.4241	0.3697	0.4158	0.4503	0.3162	0.4888	0.4466	0.5315	0.4716	0.3428	0.3458	0.5301	0.4538	0.5178	0.366	0.4976	0.4587	0.4277	0.3157	0.3955	0.4004	0.3697	0.4937	0.4294	0.2928	0.4288	0.3122	0.4107	0.4816	0.4011	0.4287	0.2816	0.3966	0.3857	0.4923	0.3649
GPBP1L1	2769	ES	2	1	3	0	0.9982	0.4492	0.0753	0.8503	0.7988	0.665	0.94	0.8411	0.8444	0.6961	0.6859	0.6091	0.8189	0.812	0.8959	0.8137	0.7456	0.8194	0.8119	0.8422	0.7922	0.86	0.8017	0.7486	0.7988	0.797	0.7679	0.8811	0.8562	0.7564	0.8562	0.8297	0.7624	0.8448	0.8717	0.8652	0.8171	0.7679	0.6895	0.8792	0.8161	0.8636	0.8871
IPP	2771	AT	9.2			0	1	0.4575	0.0531	0.9208	0.8133	0.8866	0.8312	0.8974	0.9145	0.8873	0.8687	0.957	0.9402	0.8947	0.8516	0.9129	0.9281	0.9031	0.7747	0.8085	0.8814	0.9445	0.9385	0.8659	0.8529	0.8846	0.8915	0.8788	0.9188	0.8474	0.9426	0.71	0.9006	0.8827	0.883	0.8771	0.9535	0.9419	0.9184	0.897	0.91	0.9853	0.8828
IPP	2772	AT	10			0	1	0.4575	0.0531	0.0792	0.1867	0.1134	0.1688	0.1026	0.0855	0.1127	0.1313	0.043	0.0598	0.1053	0.1484	0.0871	0.0719	0.0969	0.2253	0.1915	0.1186	0.0555	0.0615	0.1341	0.1471	0.1154	0.1085	0.1212	0.0812	0.1526	0.0574	0.29	0.0994	0.1173	0.117	0.1229	0.0465	0.0581	0.0816	0.103	0.09	0.0147	0.1172
MAST2	2773	AA	29.1	28	29.2	0	1	0.0073	0.0004	1	1	1	1	1	1	1	1	1	1	1	1	1	1	1	1	1	1	1	1	1	1	1	1	1	1	1	1	1	1	1	1	1	1	1	1	1	1	1	1
MAST2	2774	RI	25.2	25.1	25.3	0	0.9964	0	0	1	1	1	1	1	1	1	1	1	1	1	1	1	1	1	1	1	1	1	1	1	1	1	1	1	1	1	1	1	1	1	1	1	1	1	1	1	1	1	1
MAST2	2775	ES	10	9	11	0	0.9964	0.1645	0.0177	0.9937	0.9172	1	1	0.9652	1	1	1	1	0.9775	1	1	1	1	1	1	1	1	0.9917	1	1	1	0.9878	1	1	1	1	0.9901	1	1	1	1	1	0.9069	1	0.99	1	1	1	1
PIK3R3	2776	AP	2.1			0	1	0.5221	0.0436	0.0222	0.0165	0.0495	0.0222	0.0181	0.0275	0.2545	0.0413	0.0187	0.0111	0.022	0.0247	0.0386	0.0203	0.1953	0.0335	0.0089	0.0317	0.0478	0.0278	0.0541	0.0272	0.0727	0.0293	0.0179	0.0184	0.0553	0.0367	0.0356	0.0815	0.135	0.0576	0.0181	0.0403	0.0264	0.0576	0.0254	0.1234	0.1038	0.0345
PIK3R3	2777	AP	3.1			0	1	0.5221	0.0451	0.9778	0.9835	0.9505	0.9706	0.9819	0.9725	0.7455	0.9587	0.9813	0.9889	0.978	0.9753	0.9614	0.9797	0.8047	0.9665	0.9911	0.9683	0.9522	0.9722	0.9459	0.9728	0.9273	0.9707	0.9821	0.9816	0.9447	0.9633	0.9644	0.9185	0.865	0.9424	0.9819	0.9597	0.9736	0.9424	0.9747	0.8766	0.8962	0.9655
PIK3R3	2778	AP	1			0	1	0.1652	0.0083	0	0	0	0.0072	0	0	0	0	0	0	0	0	0	0	0	0	0	0	0	0	0	0	0	0	0	0	0	0	0	0	0	0	0	0	0	0	0	0	0	0
PIK3R3	2779	ES	10	9	11	0	0.9927	0.2735	0.0231	0.9653	0.9794	1	1	1	1	1	1	0.9551	1	1	1	1	1	1	1	1	1	1	0.823	0.9628	0.9624	1	1	1	0.984	1	1	0.9576	0.9888	0.9316	1	1	1	1	1	1	0.971	1	1
POMGNT1	2781	AP	2			0	1	0.8592	0.1455	0.7263	0.9246	0.7709	0.9192	0.8997	0.7989	0.5874	0.9098	0.96	0.7377	0.8137	0.815	0.8074	0.8599	0.9024	0.537	0.7178	0.8185	0.8458	0.8245	0.7707	0.9569	0.6096	0.623	0.4736	0.8849	0.8825	0.8093	0.8739	0.5914	0.9006	0.6399	0.7224	0.7695	0.8062	0.7712	0.6499	0.5871	0.9442	0.5256
POMGNT1	2782	AP	4			0	1	0.3212	0.0183	0	0.0121	0.0076	0	0	0.0191	0.0083	0.021	0.0151	0	0	0	0	0.0147	0.0049	0.0586	0.0202	0.0178	0	0	0.0088	0	0	0	0.0707	0.0349	0	0	0.0094	0.0197	0	0	0.0096	0	0	0	0	0	0.01	0.0108
POMGNT1	2783	AP	1			0	1	0.8592	0.1424	0.2737	0.0634	0.2215	0.0808	0.1003	0.182	0.4044	0.0692	0.0249	0.2623	0.1863	0.185	0.1926	0.1254	0.0927	0.4044	0.262	0.1637	0.1542	0.1755	0.2205	0.0431	0.3904	0.377	0.4557	0.0802	0.1175	0.1907	0.1168	0.3889	0.0994	0.3601	0.268	0.2305	0.1938	0.2288	0.3501	0.4129	0.0458	0.4636
POMGNT1	2784	RI	22.2	22.1	22.3	0	1	0.3001	0.0417	0.9631	0.995	0.6999	0.9861	0.9604	0.9878	0.9663	0.7951	0.9763	0.9908	0.9465	0.9938	0.9757	0.8561	0.9786	0.9924	0.9938	0.9933	0.9674	0.9299	0.9413	0.9732	0.9043	0.9891	0.9728	0.9779	0.9852	0.934	0.7665	0.9853	0.9268	0.9798	0.9876	0.9921	0.9908	0.9663	0.9864	0.9818	0.9411	0.9816
POMGNT1	2785	AD	21.2	21.1	22.1	0	1	0.0553	0.004	1	1	1	1	1	1	1	0.9949	1	1	1	1	1	1	1	0.995	1	1	1	1	1	1	1	1	1	1	1	1	1	1	0.982	0.9951	1	0.996	1	1	1	0.9962	1	0.9969
POMGNT1	2786	RI	12.4	12.3	12.5	0	1	0.4891	0.0644	0.0971	0.0346	0.0809	0.0895	0.0423	0.0304	0.0622	0.1152	0.092	0.0333	0.1048	0.0633	0.0967	0.0251	0.0573	0.0661	0.0533	0.1483	0.1036	0.0508	0.1679	0.1475	0.0989	0.145	0.1335	0.2004	0.1201	0.1384	0.0448	0.1504	0.0949	0.0505	0.0592	0.2791	0.1402	0.0856	0.0876	0.098	0.0869	0.1626
POMGNT1	2787	RI	12.2	12.1	12.3	0	1	0.5091	0.0728	0.0711	0.0324	0.2004	0.0796	0.0423	0.0174	0.066	0.054	0.1128	0.0544	0.1194	0.0776	0.0731	0.0508	0.0942	0.0553	0.0489	0.1761	0.1048	0.084	0.221	0.1636	0.1316	0.1311	0.1858	0.2309	0.1629	0.2065	0.0494	0.1173	0.1024	0.0921	0.043	0.3304	0.152	0.0968	0.0757	0.0941	0.1016	0.1847
POMGNT1	2788	ES	9	8	10	0	1	0.0636	0.0065	0.9954	0.9822	0.9909	1	1	1	1	0.9848	0.9956	1	0.996	1	1	0.9745	0.995	0.9944	1	0.9886	1	0.9912	1	1	0.9917	1	0.9844	0.9902	1	0.9924	0.9954	1	0.9934	1	1	0.9826	0.9949	0.996	1	1	1	0.995
RAD54L	2789	RI	1.2	1.1	1.3	0	0.9509	0.0337	0.0015	1		1		1		1	1	1	1	1	1	1	1	1	1		1	1	1	1	1	1	1	1	1	1	1	1	1	1	1	1	1	1	1	1	1	1	1
NSUN4	2791	AP	2.1			0	1	0.1001	0.0101	0	0.0333	0	0	0	0	0.0563	0	0	0	0	0	0	0	0	0	0	0	0	0	0.041	0	0	0	0	0.0233	0	0	0	0	0	0	0	0	0	0	0	0	0	0
NSUN4	2792	AP	1			0	1	0.1001	0.0101	1	0.9667	1	1	1	1	0.9437	1	1	1	1	1	1	1	1	1	1	1	1	1	0.959	1	1	1	1	0.9767	1	1	1	1	1	1	1	1	1	1	1	1	1	1
NSUN4	2793	ES	4	3	5	0	1	0.2566	0.0376	0.9907	0.8968	0.9725	0.9755	0.979	0.9281	0.9374	0.9182	0.9781	0.9595	0.9107	1	0.9723	0.9148	0.9755	0.8936	0.957	1	0.8528	0.9811	0.9416	0.9536	0.977	0.9751	0.9574	0.8481	0.9777	0.9272	0.9479	0.9362	0.9583	0.9182	0.9359	0.9202	0.8804	0.9567	0.9135	0.9511	0.9493	0.951
NSUN4	2794	ES	2.2	1	3	0	0.9764	0.8218	0.1374	0.2453	0.133	0.5009	0.7465	0.2507	0.5009	0.3783	0.4824	0.3679	0.5112	0.422	0.5444	0.1755	0.187	0.178	0.4009	0.2292	0.3216	0.3719	0.1433	0.3274	0.1824	0.1266	0.1824	0.5084	0.4053	0.1584	0.2894	0.1698	0.0734	0.0582	0.3713	0.5209	0.1374	0.2796	0.1888	0.055	0.2456	0.187	0.1003
MKNK1	2798	AP	2.1			0	0.9909	0.6409	0.1122	0.5947	0.3942	0.5613	0.5539	0.6299	0.5167	0.4414	0.6221	0.5273	0.5076	0.4232	0.4778	0.6385	0.6604	0.7652	0.6574	0.5102	0.4414	0.504	0.6503	0.623	0.5649	0.6613	0.4245	0.5388	0.5252	0.7086	0.5855	0.5916	0.6023	0.5273	0.5161	0.3145	0.6589	0.4541	0.4658	0.5933	0.5847	0.6823	0.7662
MKNK1	2800	AP	1			0	0.9909	0.6409	0.1122	0.4053	0.6058	0.4387	0.4461	0.3701	0.4833	0.5586	0.3779	0.4727	0.4924	0.5768	0.5222	0.3615	0.3396	0.2348	0.3426	0.4898	0.5586	0.496	0.3497	0.377	0.4351	0.3387	0.5755	0.4612	0.4748	0.2914	0.4145	0.4084	0.3977	0.4727	0.4839	0.6855	0.3411	0.5459	0.5342	0.4067	0.4153	0.3177	0.2338
MKNK1	2802	AT	9.2			0	1	0.1263	0.023	0.0994	0.0445	0.0564	0.0544	0.0727	0.0477	0.0508	0.0747	0.0826	0.0713	0.0656	0.0561	0.071	0.1138	0.0746	0.0586	0.0962	0.0831	0.091	0.0739	0.1114	0.0575	0.0723	0.0894	0.0542	0.0765	0.0914	0.074	0.0827	0.0779	0.0904	0.0941	0.0731	0.0574	0.0942	0.0787	0.0324	0.0674	0.0772	0.0733
MKNK1	2804	AT	7.2			0	1	0.2304	0.0326	0.0185	0.0099	0.0215	0.0123	0.0808	0.0209	0.0999	0.1005	0.0243	0.0487	0.0099	0.0413	0.0111	0.0284	0.04	0.012	0.0105	0.017	0.0392	0.0209	0.0233	0.0184	0.0488	0.0098	0.0077	0.035	0.0245	0.0435	0.0663	0.0327	0.0284	0.0439	0.0436	0.1563	0.0071	0.0297	0.0553	0.039	0.0695	0.0536
MKNK1	2806	AT	17			0	1	0.2524	0.0384	0.8821	0.9456	0.9221	0.9334	0.8466	0.9314	0.8492	0.8249	0.8931	0.88	0.9246	0.9026	0.9179	0.8578	0.8854	0.9294	0.8933	0.8999	0.8698	0.9052	0.8653	0.9241	0.8789	0.9007	0.9381	0.8885	0.8841	0.8825	0.851	0.8893	0.8811	0.862	0.8833	0.7864	0.8987	0.8916	0.9123	0.8935	0.8534	0.8731
MKNK1	2807	ES	16	15.2	17	0	1	0.5379	0.0923	0.5333	0.7222	0.7273	0.7912	0.7373	0.7949	0.8537	0.4796	0.7973	0.7305	0.6292	0.8152	0.6327	0.7097	0.6849	0.8168	0.8387	0.7486	0.771	0.8256	0.6695	0.6333	0.7248	0.6667	0.7358	0.6005	0.7356	0.6617	0.7143	0.7595	0.6506	0.7516	0.8448	0.6429	0.8085	0.7273	0.4601	0.7792	0.7732	0.7907
MKNK1	2808	AA	15.1	14	15.2	0	0.9982	0.2802	0.0368	0.0295	0.0502	0.0485	0.0538	0.0482	0.0646	0.0433	0.0429	0.0305	0.0509	0.0335	0.0502	0.059	0.0149	0.0759	0.062	0.0637	0.0619	0.0169	0.1227	0.0689	0.0477	0.0815	0.1097	0.1905	0.0961	0.0944	0.058	0.0648	0.0477	0.0568	0.0329	0.0731	0.063	0.0609	0.0287	0.027	0.0651	0.084	0.0939
MKNK1	2809	ES	11	10	12	0	1	0.5838	0.0593	0.2002	0.1967	0.1594	0.0817	0.0406	0.1117	0.1146	0.0944	0.1925	0.1182	0.1189	0.143	0.1143	0.1326	0.073	0.1249	0.1125	0.2125	0.0833	0.1725	0.1637	0.0925	0.143	0.0878	0.15	0.1697	0.0989	0.1153	0.18	0.143	0.1117	0.1196	0.0883	0.1221	0.1751	0.224	0.0958	0.0766	0.1071	0.1272
MKNK1	2810	ES	9.1	8	10	0	0.9982	0.2667	0.0288	0.9748	1	0.9838	0.9602	1	0.9879	0.9523	0.9506	0.9321	0.9656	0.968	0.9663	0.9519	1	0.9799	0.9823	0.9692	0.9758	0.9504	0.9751	0.8544	0.9707	1	0.973	1	0.9422	0.9664	0.9878	0.9695	0.986	1	0.9902	0.9539	0.9218	0.9631	0.9668	0.994	0.9805	0.9837	1
MKNK1	2812	ES	7.1	5	8	0	1	0.1251	0.0197	0.9907	0.9758	1	0.9906	0.9414	0.9807	1	0.9921	0.9842	0.9894	0.9625	0.9741	1	0.9312	0.9879	0.9785	0.9864	1	0.8796	1	0.9257	0.9883	1	0.9638	0.9741	1	0.9816	0.9803	0.9916	0.9895	1	0.9936	0.9599	0.9439	0.9864	1	0.9682	0.9512	0.9796	0.9697
MKNK1	2813	ES	6	5	7.1	0	1	0.087	0.0116	0.0064	0.0076	0.0085	0.0116	0.0217	0.0379	0.0406	0.0105	0.0083	0	0.0094	0.0198	0.0319	0	0	0.0064	0.0045	0.0235	0.0151	0	0	0	0.0061	0.0241	0.0086	0.0092	0.0462	0.003	0.0124	0.007	0.0203	0.0227	0.0471	0.0162	0.0207	0	0.0105	0.0123	0.0197	0.041
MKNK1	2814	ES	4	3	5	0	1	0.5103	0.0858	0.2075	0.3034	0.3495	0.2608	0.1344	0.2568	0.1737	0.3064	0.3318	0.1802	0.215	0.2162	0.1968	0.2304	0.1815	0.248	0.2775	0.1747	0.2204	0.2974	0.4369	0.3473	0.2714	0.2991	0.2808	0.2795	0.1679	0.2258	0.2759	0.245	0.1133	0.1926	0.3177	0.046	0.2826	0.2286	0.1121	0.2579	0.1256	0.2123
MKNK1	2815	AD	2.2	2.1	3	0	0.9927	0.7393	0.1097	0.5899	0.6165	0.5555	0.6857	0.5129	0.5647	0.8186	0.5822	0.4037	0.6286	0.5371	0.6123	0.4973	0.7762	0.3925	0.646	0.6074	0.4413	0.724	0.3367	0.5265	0.7946	0.7174	0.7032	0.5752	0.49	0.6024	0.6029	0.6617	0.4916	0.5621	0.6638	0.7437	0.8024	0.557	0.4838	0.5983	0.6016	0.7009	0.5492
MOB3C	2816	AP	1			0	1	0.8484	0.1389	0.7464	0.817	0.794	0.8527	0.8724	0.8304	0.6519	0.7232	0.6798	0.7662	0.8098	0.6746	0.674	0.7446	0.8646	0.7175	0.7585	0.6547	0.6869	0.7442	0.7532	0.7375	0.5955	0.6249	0.759	0.5207	0.6698	0.6384	0.7906	0.6792	0.7732	0.7544	0.8047	0.8338	0.6042	0.8563	0.7084	0.7643	0.6405	0.6133
MOB3C	2817	AP	2.1			0	1	0.8484	0.1389	0.2536	0.183	0.206	0.1473	0.1276	0.1696	0.3481	0.2768	0.3202	0.2338	0.1902	0.3254	0.326	0.2554	0.1354	0.2825	0.2415	0.3453	0.3131	0.2558	0.2468	0.2625	0.4045	0.3751	0.241	0.4793	0.3302	0.3616	0.2094	0.3208	0.2268	0.2456	0.1953	0.1662	0.3958	0.1437	0.2916	0.2357	0.3595	0.3867
MOB3C	2818	RI	2.2	2.1	2.3	0	0.9945	0.3963	0.0438	1	1	1	1	1	1	1	1	1	1	1	1	1	0.7775	1	1	1	1	1	1	1	1	1	0.9042	1	0.9785	0.8959	0.9336	1	1	1	1	1	1	1	1	1	1	1	1
ATPAF1	2819	AP	1			0	1	0.1426	0.021	0.9901	1	0.9823	1	1	1	1	1	1	1	1	1	0.961	1	1	1	1	0.9784	0.9857	1	1	1	0.9487	0.9497	1	0.9876	0.8593	1	1	1	1	0.9841	1	1	1	1	1	0.9855	1	0.9859
ATPAF1	2820	AP	2			0	1	0.1426	0.021	0.0099	0	0.0177	0	0	0	0	0	0	0	0	0	0.039	0	0	0	0	0.0216	0.0143	0	0	0	0.0513	0.0503	0	0.0124	0.1407	0	0	0	0	0.0159	0	0	0	0	0	0.0145	0	0.0141
ATPAF1	2821	ES	09:10:00	8	11	0	1	0.1754	0.0274	0.9734	0.9284	0.975	0.8689	0.9544	0.9809	0.9509	0.9534	0.9665	0.9232	0.9042	0.9487	0.9262	0.9625	0.9447	0.9217	0.8971	0.9708	0.9206	0.9324	0.9339	0.9363	0.9624	0.9372	0.9587	0.9333	0.9476	0.9631	0.9869	0.949	0.9962	0.9523	0.9317	0.9654	0.9592	0.9743	0.9431	0.9709	0.9264	0.9617
ATPAF1	2822	ES	4	3	5	0	0.9764	0.3296	0.0432	0.1218		0.0985	0.1973	0.2694	0.0895	0	0.0428	0.0562	0	0.0394	0.0895	0.1285	0.0167	0	0	0.0656	0.0492	0.0518		0.1408	0.0518	0.0339	0.0703	0.0895	0.0451	0.1285	0.0475	0.0781	0.1643	0.0507	0.0281	0.0281	0	0.0687	0.0317	0	0.0121	0.0557	0.0118
EFCAB14	2823	AT	13			0	1	0.3227	0.0592	0.2193	0.0889	0.2177	0.0952	0.1156	0.108	0.2583	0.2088	0.1969	0.1792	0.1043	0.1171	0.1417	0.2404	0.1313	0.127	0.1441	0.1681	0.2294	0.0845	0.0705	0.1609	0.2151	0.1516	0.1341	0.2264	0.0953	0.2379	0.2482	0.1051	0.3184	0.2906	0.174	0.2998	0.2184	0.1883	0.2453	0.1839	0.2388	0.2274
EFCAB14	2824	AT	11			0	1	0.3227	0.0592	0.7807	0.9111	0.7823	0.9048	0.8844	0.892	0.7417	0.7912	0.8031	0.8208	0.8957	0.8829	0.8583	0.7596	0.8687	0.873	0.8559	0.8319	0.7706	0.9155	0.9295	0.8391	0.7849	0.8484	0.8659	0.7736	0.9047	0.7621	0.7518	0.8949	0.6816	0.7094	0.826	0.7002	0.7816	0.8117	0.7547	0.8161	0.7612	0.7726
EFCAB14	2825	ES	7	6	8	0	1	0.6691	0.1196	0.7342	0.7542	0.7038	0.5495	0.4835	0.5288	0.7643	0.7627	0.8638	0.4155	0.7217	0.6394	0.7107	0.6335	0.629	0.6476	0.5658	0.8493	0.5792	0.6688	0.6491	0.685	0.7202	0.6996	0.4913	0.7455	0.6176	0.5058	0.7503	0.5785	0.8914	0.5553	0.6046	0.6482	0.833	0.7893	0.5102	0.5691	0.6848	0.8065
CYP4B1	2829	AP	1			0	0.7855	0.209	0.024	1	0.998	1	0.9972		0.9983	1	1	0.9733	1	0.9902	0.9951		1	1	0.9986	0.998	0.9893	1	0.9838	0.9871	0.9493	0.9952	0.9941	0.9413	0.9894	0.9887	1	1	1		0.9941	0.9974		1	1		1	1	0.9847
CYP4B1	2830	AP	3.1			0	0.7855	0.209	0.024	0	0.002	0	0.0028		0.0017	0	0	0.0267	0	0.0098	0.0049		0	0	0.0014	0.002	0.0107	0	0.0162	0.0129	0.0507	0.0048	0.0059	0.0587	0.0106	0.0113	0	0	0		0.0059	0.0026		0	0		0	0	0.0153
CYP4B1	2831	AT	9.2			0	0.9418	0.1856	0.0204	0	0	0	0.0064	0	0.0019	0	0	0.0039	0	0.0061	0.0052	0	0	0	0.003	0.0028	0.0196	0.009	0.0309	0.0074	0.0247	0.0014	0.002	0.0073	0	0.0173	0	0.0392	0.0094	0	0.009	0.0047	0	0.0517	0.1709	0	0	0.0095	0.0024
CYP4B1	2832	AT	13			0	0.9418	0.1856	0.0204	1	1	1	0.9936	1	0.9981	1	1	0.9961	1	0.9939	0.9948	1	1	1	0.997	0.9972	0.9804	0.991	0.9691	0.9926	0.9753	0.9986	0.998	0.9927	1	0.9827	1	0.9608	0.9906	1	0.991	0.9953	1	0.9484	0.8291	1	1	0.9905	0.9976
CYP4B1	2842	ES	00:02:03.200000	1	5	0	0.7782	0.0598	0.0035	1	0.9991	1	1		1	1	1	1	1	0.9942	0.9995		1	1	0.9993	0.999	0.9903	1	1	1	1	1	1	1	1	1	1	1	1		0.997	0.9991		0.9805		1	1	1	1
CYP4X1	2888	AP	1			0	0.84	0.9222	0.1607	0	0	0	0.1029	0	0.052	0	0.564	0.0073	0.2816	0.0059	0	0	0	0.0945	0.0066	0.0073	0	0	0	0	0	0	0.0028	0	0	0.0166	0.3927	0	0.0613	0	0.0336	0.0436	0	0	0	0	0.1834	0	0
CYP4X1	2889	AP	2			0	0.84	0.9222	0.1607	1	1	1	0.8971	1	0.948	1	0.436	0.9927	0.7184	0.9941	1	1	1	0.9055	0.9934	0.9927	1	1	1	1	1	1	0.9972	1	1	0.9834	0.6073	1	0.9387	1	0.9664	0.9564	1	1	1	1	0.8166	1	1
PDZK1IP1	2893	AP	2.1			0	0.8982	0.0247	0.0016	1	1	1	1	1	1	1	1	1	1	1	1	1	1	1	1	1	1	1	1	1	0.9992	1	1			0.9995	1	1	1	1	1	1		1	1	1	1	1	1
PDZK1IP1	2894	AP	1			0	0.8982	0.0247	0.0016	0	0	0	0	0	0	0	0	0	0	0	0	0	0	0	0	0	0	0	0	0	0.0008	0	0			0.0005	0	0	0	0	0	0		0	0	0	0	0	0
STIL	2903	AA	16.2	15	16.3	0	0.8236	0.8156	0.1453	0.5489		0.8228		0.6845		0.7183		0.9325	0.2802	0.8756		0.7255	0.2438					0.5059		0.4198	0.6053	0.5903	0.6405	0.5625	0.8776	0.7564	0.7299	0.8546	0.6542	0.6862	0.5895		0.7192	0.7633	0.6509	0.4184	0.6459	0.4685	0.7137
CMPK1	2905	AT	7			0	1	0.0057	0.0007	0.9997	0.9997	0.9969	0.9997	0.9991	0.998	0.9995	0.9991	1	0.9986	0.9992	1	0.9996	0.9988	0.9996	1	0.9989	1	1	0.9994	1	0.9992	0.9991	1	0.999	0.9995	0.9998	0.9995	0.9997	0.999	0.9985	0.9987	0.9992	1	1	0.9965	0.9996	1	0.9985	1
CMPK1	2906	AT	2			0	1	0.0057	0.0007	0.0003	0.0003	0.0031	0.0003	0.0009	0.002	0.0005	0.0009	0	0.0014	0.0008	0	0.0004	0.0012	0.0004	0	0.0011	0	0	0.0006	0	0.0008	0.0009	0	0.001	0.0005	0.0002	0.0005	0.0003	0.001	0.0015	0.0013	0.0008	0	0	0.0035	0.0004	0	0.0015	0
CMPK1	2907	ES	5	4	6	0	1	0.0265	0.0053	0.9918	0.9976	0.9897	0.9943	1	0.9975	0.9973	0.9977	0.9958	0.9946	0.9953	1	1	0.9965	0.9922	0.9915	0.9884	0.9935	0.99	0.9915	0.9858	0.9911	1	0.9906	0.9937	1	0.9925	0.9902	0.9948	0.9925	0.9949	0.9982	1	0.9782	0.9972	0.9886	0.9974	1	1	0.9972
CMPK1	2908	ES	3	1	4	0	1	0.0224	0.0033	0.9947	0.9936	1	0.9949	0.9889	1	1	0.9964	0.9969	1	0.9965	0.9963	1	1	1	0.9977	1	0.9921	1	1	1	1	0.9917	0.994	0.9949	0.9981	0.9913	0.9978	0.9973	1	0.997	0.9974	1	1	0.9963	0.9968	1	1	1	1
FAF1	2936	AP	9			0	0.8782	0.3866	0.0302	0.0155	0	0	0	0		0	0	0.1313	0	0		0	0.0419	0	0	0	0	0		0.0571	0	0.0419	0	0	0.0443	0	0	0.0443	0	0	0	0	0.0346	0	0	0.0283	0	0	0
FAF1	2937	AP	7.1			0	0.8782	0.4501	0.0432	0.2745	0	0.0201	0	0.0518		0	0	0.091	0	0.0459		0	0	0	0.0359	0.1331	0	0		0	0.0275	0	0	0	0	0.0793	0.0294	0	0.1296	0	0	0.0592	0	0	0	0	0	0	0.136
FAF1	2938	AP	1.1			0	0.8782	0.4501	0.0519	0.71	1	0.9799	1	0.9482		1	1	0.7778	1	0.9541		1	0.9581	1	0.9641	0.8669	1	1		0.9429	0.9725	0.9581	1	1	0.9557	0.9207	0.9706	0.9557	0.8704	1	1	0.9408	0.9654	1	1	0.9717	1	1	0.864
FAF1	2939	ES	20	19	21	0	1	0.0326	0.0051	0.0126	0.0082	0.0017	0.0158	0	0	0	0.0044	0	0.0056	0.0013	0	0.0058	0.0086	0	0	0.0067	0.0051	0.0151	0	0	0.0056	0.0125	0	0	0.0063	0.011	0.0063	0.0068	0.0153	0.0053	0.0031	0.0064	0	0.0188	0.0174	0.0102	0.0114	0.0154	0.0018
FAF1	2940	RI	1.2	1.1	1.3	0	0.9855	0.3784	0.0496	0.9299	1	1	1	1	1	0.8719	1	0.9015	0.9215	0.9169	1	1	1	1	1	0.9015	1	1	1	1	0.8615	0.9269	1	0.92	1	1	0.9528	0.9293	1	0.9485	1	0.92	0.9326	0.9243	1	1	1	1	0.9469
CDKN2C	2941	AP	1			0	0.96	0.2411	0.0408	0	0	0	0	0	0	0	0	0	0	0	0	0	0	0	0	0	0.1414	0.0957	0	0	0	0	0	0	0	0	0	0	0	0.1896	0	0	0	0	0.1291	0	0	0	0
CDKN2C	2942	AP	3.1			0	0.96	0.2411	0.0408	1	1	1	1	1	1	1	1	1	1	1	1	1	1	1	1	1	0.8586	0.9043	1	1	1	1	1	1	1	1	1	1	1	0.8104	1	1	1	1	0.8709	1	1	1	1
TTC39A	2950	AT	15.5			0	1	0.6089	0.0928	0.2412	0.1715	0.2353	0.0935	0.2862	0.0906	0.148	0.1162	0.1633	0.1316	0.2382	0.0754	0.2291	0.0884	0.1726	0.085	0.1053	0.3297	0.3477	0.2339	0.2052	0.0995	0.1462	0.1798	0.1545	0.1517	0.125	0.2031	0.1065	0.2616	0.2064	0.1796	0.0878	0.1658	0.3437	0.2113	0.1827	0.1373	0.2021	0.2327
TTC39A	2951	AT	21			0	1	0.6483	0.0983	0.7479	0.8223	0.7233	0.9008	0.7138	0.9023	0.8113	0.8336	0.8195	0.8548	0.7489	0.9227	0.7571	0.8949	0.7986	0.9098	0.8866	0.6278	0.6409	0.7612	0.7852	0.8808	0.8136	0.8063	0.84	0.8288	0.8663	0.7707	0.7652	0.7059	0.7609	0.8071	0.9033	0.8148	0.6563	0.7596	0.8042	0.8456	0.7915	0.7248
TTC39A	2952	AT	16.2			0	1	0.1534	0.0189	0.0108	0.0062	0.0414	0.0057	0	0.0071	0.0407	0.0503	0.0172	0.0136	0.0129	0.0019	0.0138	0.0167	0.0287	0.0051	0.0081	0.0424	0.0115	0.0048	0.0095	0.0197	0.0402	0.0139	0.0054	0.0195	0.0086	0.0261	0.1283	0.0325	0.0327	0.0133	0.0089	0.0194	0	0.0291	0.0131	0.017	0.0065	0.0425
TTC39A	2953	AD	15.4	15.3	16.1	0	0.8218	1	0.0795	0	0.0147	0.0751	0.0104		0.0075	0.0044	0.0435	0.0315	0		0.0059	0.0664	0		0.0037	0.0073		0.0168	0.0356	0	0.0173	0.0394		0.0181	0	0.0082	0.0208	0	0.2607	0.0117	0	0		0.0307		0.0143	0	0
[truncated: 44,496 more rows]
[truncated: 285 more columns]
