# Supplementary material for: Survival-associated alternative splicing signatures in non-small cell lung cancer
Source: Aging (Albany NY). 2020 Apr 13;12(7):5878–93. doi: 10.18632/aging.102983 (PMC7185095; doi:10.18632/aging.102983)
Supplement: Supplementary Table 3 [file aging-12-102983-s005..xlsx]

## Sheet: DEAS_MALE_LUAD
symbol	splice_type	as_id	exons	from_exon	to_exon	novel_splice	pct_with_values	psi_range	std_psi	logFC	AveExpr	t	P.Value	adj.P.Val	B
HES4	AD	4	1.2:1.3	1.1	2	0	0.9738	0.6938	0.084	0.153609	0.87208	3.89202	0.000805204	0.0169197	-2.00476
UBE2J2	ES	48	6.1	5	7	0	0.9983	0.2947	0.0429	0.0468833	0.0441375	4.58456	0.000123703	0.00435211	-0.221032
DVL1	AD	141	11.2	11.1	12	0	0.9878	0.8944	0.1676	0.191227	0.412176	5.27481	2.86869e-05	0.00151133	1.33782
CCNL2	AT	155	12	NA	NA	0	1	0.7208	0.0939	-0.0891917	0.6388	-4.46555	0.00016707	0.00546998	-0.521108
CCNL2	AT	157	6.3	NA	NA	0	1	0.7208	0.0939	0.0891917	0.3612	4.46555	0.00016707	0.00546998	-0.521108
CCNL2	ES	161	6.1:6.2	5	7.2	0	0.9354	0.7118	0.1407	-0.181294	0.190873	-3.54341	0.00257266	0.0391268	-2.92477
ANKRD65	RI	170	1.2	1.1	1.3	0	0.897	0.8799	0.1664	0.218587	0.418652	4.46841	0.000410482	0.0104011	-1.01634
SLC35E2B	ES	207	2	1	3	0	0.9895	0.8519	0.1621	0.137433	0.508058	3.51786	0.00179351	0.0301467	-2.86546
NADK	AP	227	2	NA	NA	0	0.9983	0.3594	0.0484	0.031725	0.0238167	3.93057	0.000642772	0.0142206	-1.85833
MORN1	AT	252	8	NA	NA	0	0.9616	1	0.2113	0.290415	0.302361	4.30255	0.000360372	0.00953531	-1.11495
MORN1	AT	253	17	NA	NA	0	0.9616	1	0.2296	-0.33192	0.512014	-6.18572	5.26313e-06	0.000422763	3.17522
MEGF6	AP	311	1	NA	NA	0	0.8726	0.953	0.2376	-0.316579	0.365958	-5.0369	7.76877e-05	0.00318342	0.488225
MEGF6	AP	312	6	NA	NA	0	0.8726	0.953	0.2376	0.316579	0.634044	5.0369	7.76877e-05	0.00318342	0.488225
MEGF6	ES	315	31	30	32	0	0.9616	0.8824	0.1676	-0.211386	0.790872	-7.2139	3.49148e-07	4.91694e-05	5.832
KCNAB2	AP	360	2	NA	NA	0	0.9791	1	0.1326	0.0478043	0.105945	3.54829	0.00174651	0.0296974	-2.80478
KCNAB2	AP	361	3	NA	NA	0	0.9791	1	0.1543	-0.13943	0.837277	-3.44572	0.00223917	0.0354642	-3.04748
ICMT	ES	385	03:04:00	2	5	0	0.9983	0.6149	0.1091	0.135121	0.80791	4.7499	8.14984e-05	0.0032732	0.196558
ICMT	ES	386	4	2	5	0	1	0.2862	0.0351	0.034725	0.941296	4.63125	0.000109948	0.00399243	-0.103177
ACOT7	AP	390	4	NA	NA	0	0.9948	0.7777	0.175	-0.306792	0.346604	-8.96344	4.58645e-09	1.91453e-06	10.1544
ACOT7	AP	391	2	NA	NA	0	0.9948	0.9549	0.2152	0.288021	0.22176	6.73614	6.24546e-07	7.93101e-05	5.12617
CAMTA1	AT	501	26	NA	NA	0	1	0.3061	0.0436	-0.0401208	0.0782812	-4.39214	0.000201098	0.00632034	-0.705908
PARK7	AD	528	1.2	1.1	3	0	1	0.6019	0.0913	-0.0862083	0.609658	-4.6753	9.83784e-05	0.00371992	0.00806042
RERE	AP	543	14	NA	NA	0	0.9791	0.8056	0.1448	-0.187329	0.328235	-5.06336	3.70264e-05	0.00183619	0.988682
RERE	AP	544	1	NA	NA	0	0.9791	1	0.1588	0.162233	0.370517	3.93409	0.000637122	0.0141383	-1.84962
TMEM201	AT	564	11	NA	NA	0	1	0.6964	0.119	0.163654	0.506948	8.76554	6.91133e-09	2.64061e-06	9.73365
TMEM201	AT	565	6.2	NA	NA	0	1	0.6964	0.119	-0.163654	0.493052	-8.76554	6.91133e-09	2.64061e-06	9.73365
CLSTN1	ES	575	11	10	12	0	0.9983	0.9011	0.1633	-0.204242	0.346608	-6.64045	7.82541e-07	9.19416e-05	4.89636
CLSTN1	ES	576	3	2	4	0	0.9773	0.7799	0.1224	-0.2131	0.27417	-7.73775	8.47534e-08	1.66445e-05	7.22314
CTNNBIP1	AP	577	1	NA	NA	0	0.9948	1	0.1948	-0.280338	0.640565	-4.4072	0.000193595	0.00613279	-0.668024
CTNNBIP1	AP	580	4	NA	NA	0	0.9948	0.6562	0.1276	0.153279	0.0801521	4.9746	4.62769e-05	0.00214938	0.764452
FBXO44	ES	657	5.2:6	5.1	7	0	0.9913	0.7504	0.1131	-0.100746	0.737902	-3.29065	0.00312593	0.0445616	-3.40537
PRDM2	AT	721	11	NA	NA	0	1	0.4276	0.0809	0.113267	0.749988	4.75364	8.07343e-05	0.00325142	0.205996
PRDM2	AT	722	13	NA	NA	0	1	0.4276	0.0809	-0.113267	0.250013	-4.75364	8.07343e-05	0.00325142	0.205996
PLEKHM2	ES	767	7	6	8	0	0.9965	0.75	0.119	-0.0934917	0.808267	-4.99257	4.42325e-05	0.00208977	0.809861
FBLIM1	AP	769	3	NA	NA	0	0.9389	1	0.2919	-0.245371	0.55158	-3.62628	0.00215309	0.0345373	-2.74764
SZRD1	ES	806	3	1	4.1	0	0.9913	0.6358	0.09	-0.0948087	0.444338	-4.81517	7.69729e-05	0.0031667	0.296095
SZRD1	ES	808	00:03:04.100000	1	4.2	0	0.993	0.6972	0.0982	-0.121143	0.481081	-4.16411	0.000385074	0.00998193	-1.31312
SZRD1	ES	811	3	1	4.2	0	0.9895	0.7603	0.0865	-0.0953182	0.307457	-3.35882	0.00288643	0.0423452	-3.25901
ATP13A2	ES	841	22	21	23	0	0.9965	0.1214	0.0144	0.0199667	0.984533	4.69384	9.38801e-05	0.00362788	0.054909
PADI4	AT	851	17	NA	NA	0	0.993	0.903	0.1974	-0.398863	0.36736	-8.8637	5.63575e-09	2.21093e-06	9.94297
PADI4	AT	852	4	NA	NA	0	0.993	0.903	0.1974	0.398863	0.63264	8.8637	5.63575e-09	2.21093e-06	9.94297
ARHGEF10L	ES	862	18	17	19	0	0.9442	0.9133	0.1708	0.2074	0.601952	4.57473	0.000192212	0.00611545	-0.483112
UBR4	AP	872	74.1	NA	NA	0	1	0.8793	0.1152	-0.0879875	0.337169	-3.42679	0.00224304	0.0354642	-3.08333
CAPZB	ES	906	11	10	12	0	1	0.1389	0.0171	-0.0321417	0.0345708	-5.56598	1.05687e-05	0.000712222	2.25337
TMCO4	AP	913	2	NA	NA	0	0.9791	0.9631	0.1345	0.145529	0.44186	3.49142	0.00191409	0.0317124	-2.92891
TMCO4	AP	914	1	NA	NA	0	0.9791	0.9631	0.1345	-0.145529	0.55814	-3.49142	0.00191409	0.0317124	-2.92891
RAP1GAP	AA	984	26.2	25.2	26.3	0	0.9668	0.4663	0.0525	-0.0363636	0.880593	-3.39404	0.00265544	0.0399533	-3.1777
RAP1GAP	ES	992	22.1	21	22.4	0	0.9476	0.3838	0.0593	-0.102424	0.104069	-6.2879	3.36749e-06	0.000297708	3.57151
EPHB2	RI	1026	17.2	17.1	17.3	0	0.9983	0.9802	0.1789	-0.189454	0.294581	-4.05853	0.000466199	0.0113484	-1.54092
KDM1A	ES	1032	3	2	4	0	0.9948	0.7708	0.0956	-0.114263	0.713356	-3.76126	0.000981289	0.0196428	-2.27495
IFNLR1	ES	1096	7.1	6	8.1	0	0.815	0.7134	0.087	0.125376	0.90076	3.79936	0.00148437	0.0264263	-2.37627
NIPAL3	AT	1109	14	NA	NA	0	1	0.8008	0.1296	0.112546	0.188627	5.20842	2.5741e-05	0.00140498	1.35472
NIPAL3	AT	1111	15	NA	NA	0	1	0.7972	0.1319	-0.128854	0.797452	-5.52839	1.16004e-05	0.000767619	2.1592
MTFR1L	ME	1211	5|6	4.2	7.2	0	0.9756	0.6905	0.1264	-0.118339	0.706517	-3.7234	0.00113956	0.0219991	-2.38594
AUNIP	AT	1219	3.2	NA	NA	0	1	0.4829	0.0643	-0.0698917	0.522692	-3.95418	0.000605843	0.0136861	-1.79993
AUNIP	AT	1220	4	NA	NA	0	1	0.4829	0.0643	0.0698917	0.477308	3.95418	0.000605843	0.0136861	-1.79993
PPP1R8	AD	1347	1.2:1.3	1.1	2	0	0.9913	0.7962	0.0848	0.0838409	0.142472	3.37261	0.00279373	0.0414698	-3.2272
SMPDL3B	AT	1360	7.2	NA	NA	0	1	0.5541	0.0948	0.136308	0.22675	5.07825	3.56684e-05	0.001787	1.02628
SMPDL3B	AT	1361	8	NA	NA	0	1	0.5541	0.0948	-0.136308	0.77325	-5.07825	3.56684e-05	0.001787	1.02628
RCC1	AP	1386	1	NA	NA	0	1	0.8375	0.1532	-0.168825	0.743862	-4.8368	6.54654e-05	0.00277915	0.416174
RCC1	AP	1387	5	NA	NA	0	1	0.8375	0.1532	0.168829	0.25614	4.83685	6.54556e-05	0.00277915	0.416323
RCC1	ES	1388	7	6	8	0	0.9913	0.9716	0.1241	-0.191426	0.33973	-6.00575	4.28886e-06	0.000359635	3.21578
EPB41	ES	1411	16:18:00	15	19.1	0	0.8691	1	0.2651	0.34816	0.220985	6.44754	1.24426e-05	0.000810026	2.66807
EPB41	ES	1412	18	15	19.1	0	0.9284	1	0.2294	0.244362	0.434038	4.9436	7.20087e-05	0.00300467	0.45691
COL16A1	ES	1493	44	43	45.1	0	0.9302	1	0.2144	0.470839	0.442829	8.64809	9.41202e-08	1.79802e-05	7.47277
TXLNA	AP	1558	1	NA	NA	0	0.9878	0.9349	0.1156	-0.115513	0.64691	-4.34995	0.000223695	0.00676155	-0.811961
TXLNA	AP	1559	2.1	NA	NA	0	0.9878	0.9349	0.1156	0.115508	0.353087	4.34985	0.000223754	0.00676155	-0.812222
TMEM234	RI	1569	6.2	6.1	6.3	0	0.9721	0.8047	0.165	-0.140214	0.786428	-3.56925	0.00174952	0.0297026	-2.76951
BSDC1	AA	1598	4.1:4.2	3	4.3	0	0.9529	0.4105	0.0804	0.105958	0.885337	3.95207	0.000609044	0.0137302	-1.80513
BSDC1	AA	1603	4.1	3	4.2	0	0.9983	0.5229	0.0623	0.0434917	0.158842	4.20731	0.000320565	0.00890891	-1.16966
AK2	AT	1650	8.2	NA	NA	0	1	0.6258	0.1051	0.109396	0.501285	4.70418	9.14616e-05	0.00355947	0.0810391
AK2	AT	1651	10	NA	NA	0	1	0.5702	0.104	-0.140754	0.478273	-7.54927	9.62804e-08	1.81561e-05	7.03531
CSMD2	AT	1687	50	NA	NA	0	1	0.8237	0.1802	-0.172912	0.657702	-3.8354	0.000815581	0.0171132	-2.09303
CSMD2	AT	1688	51	NA	NA	0	1	0.3348	0.0678	0.079275	0.0575792	3.81056	0.000867776	0.0179055	-2.15408
CSMD2	AT	1690	17.2	NA	NA	0	1	0.4167	0.075	0.0645417	0.0464292	3.95666	0.000602084	0.0136292	-1.79378
CLSPN	AT	1730	25	NA	NA	0	1	0.8402	0.1877	0.321767	0.340196	6.35143	1.55686e-06	0.000160576	4.19612
CLSPN	AT	1731	26	NA	NA	0	1	0.8402	0.1877	-0.321767	0.659804	-6.35143	1.55686e-06	0.000160576	4.19612
OSCP1	AT	1777	7	NA	NA	0	0.9965	0.7396	0.131	0.104908	0.319567	4.01504	0.000520028	0.0122778	-1.64901
OSCP1	AT	1778	13.2	NA	NA	0	0.9965	0.7396	0.131	-0.104908	0.680433	-4.01504	0.000520028	0.0122778	-1.64901
MACF1	ES	1881	107	106	108	0	1	0.7636	0.1437	0.179033	0.47595	4.96266	4.76868e-05	0.0021986	0.734295
MACF1	ES	1883	103	102	104	0	1	0.7097	0.1041	0.0678625	0.67929	3.32176	0.00289841	0.0424643	-3.33218
MACF1	ES	1885	77	76.1	79	0	0.9511	0.3288	0.0501	0.115565	0.913702	8.1037	3.88901e-08	9.99272e-06	8.02195
MACF1	ES	1887	59	58	60	0	0.8831	0.6518	0.1388	0.252495	0.710928	6.29837	2.64788e-06	0.000247012	3.7599
MACF1	ES	1888	43.2:44:45:46:47	42	48	0	0.9372	1	0.2714	-0.43939	0.55596	-8.06246	8.30413e-08	1.64354e-05	7.37153
PABPC4	ES	1893	11	10.2	12	0	1	0.3486	0.0426	0.0363792	0.91046	3.52109	0.00177933	0.0299427	-2.85771
PABPC4	ES	1894	10.2:11	10.1	12	0	1	0.1563	0.0177	0.0222375	0.969848	4.13768	0.000382024	0.0099263	-1.34367
PPIE	AT	1901	10	NA	NA	0	1	0.4618	0.0743	0.0538708	0.785069	3.49175	0.00191253	0.0317104	-2.92811
PPIE	AT	1902	12	NA	NA	0	1	0.4652	0.0725	-0.0541042	0.209952	-3.46884	0.00202331	0.0331345	-2.98298
NFYC	AA	2019	20.1	19	20.2	0	1	0.5249	0.0764	-0.0631917	0.361479	-4.05177	0.000474188	0.011454	-1.55773
PPCS	AD	2075	2.2	2.1	3.1	0	1	0.6833	0.1053	0.106079	0.655944	4.68064	9.70603e-05	0.00369233	0.0215612
CCDC23	AP	2118	2	NA	NA	0	0.9965	0.2664	0.0366	0.0414667	0.0478958	3.2232	0.00368021	0.0499166	-3.56316
CCDC23	AP	2119	1	NA	NA	0	0.9965	0.2664	0.0366	-0.0414667	0.952104	-3.2232	0.00368021	0.0499166	-3.56316
FAM183A	AP	2141	1	NA	NA	0	0.7993	1	0.2789	0.45755	0.254956	4.64359	0.000407842	0.0103883	-0.858989
FAM183A	AP	2142	2.1	NA	NA	0	0.7993	1	0.2789	-0.45755	0.745044	-4.64359	0.000407842	0.0103883	-0.858989
TMEM125	AA	2153	2.1	1	2.2	0	0.9651	0.9357	0.1332	0.140757	0.262098	4.3212	0.000312569	0.00875313	-1.01977
MED8	RI	2170	7.2	7.1	7.3	0	1	0.1262	0.0213	0.0187375	0.966765	3.5224	0.00177357	0.0298726	-2.85455
SZT2	AT	2175	7	NA	NA	0	1	0.4878	0.0641	0.0532167	0.178663	3.24576	0.00348502	0.048	-3.51053
B4GALT2	AP	2514	2.1	NA	NA	0	0.836	1	0.231	0.335562	0.425558	7.50631	8.89266e-05	0.00349174	1.57589
B4GALT2	AP	2515	1	NA	NA	0	0.836	1	0.231	-0.335562	0.574442	-7.50631	8.89266e-05	0.00349174	1.57589
CCDC24	AP	2519	3.1	NA	NA	0	0.8621	0.7718	0.1482	0.177479	0.397031	4.19765	0.000947698	0.019136	-1.72404
CCDC24	AP	2520	1	NA	NA	0	0.8621	0.6325	0.1213	-0.125529	0.157219	-3.72012	0.00238671	0.0370425	-2.66345
CCDC24	RI	2524	7.2	7.1	7.3	0	0.9756	1	0.0732	0.04107	0.065975	3.89311	0.000930581	0.0188624	-2.06246
MUTYH	AP	2593	3	NA	NA	0	0.9843	0.6637	0.1222	0.129823	0.170348	5.00192	5.50532e-05	0.0024409	0.67909
MUTYH	AP	2595	1.1	NA	NA	0	0.9843	0.7847	0.1203	-0.157223	0.644085	-4.77471	9.50875e-05	0.00365206	0.128493
AKR1A1	ES	2697	7	6	8	1	0.925	0.3586	0.0528	-0.0644706	0.916323	-4.90166	0.000143561	0.00487843	-0.012591
NSUN4	ES	2793	4	3	5	0	0.9983	0.2452	0.0424	0.0506167	0.943175	3.99654	0.000544753	0.0127316	-1.69493
MKNK1	AP	2798	2.1	NA	NA	0	0.9686	0.7446	0.1133	0.0960955	0.590474	3.37368	0.00278667	0.0413931	-3.22474
MKNK1	AP	2800	1	NA	NA	0	0.9686	0.7446	0.1133	-0.0960955	0.409526	-3.37368	0.00278667	0.0413931	-3.22474
EFCAB14	AT	2823	13	NA	NA	0	1	0.3194	0.0518	0.0476083	0.136479	3.44502	0.00214506	0.0344833	-3.03987
EFCAB14	AT	2824	11	NA	NA	0	1	0.3194	0.0518	-0.0476042	0.863519	-3.44475	0.00214648	0.0344833	-3.04052
OSBPL9	ES	2979	6.1	5	7	0	0.993	0.5426	0.0883	0.129679	0.807244	5.95808	4.03103e-06	0.000344583	3.2297
SCP2	ES	3045	12	11	13	0	1	0.8004	0.1682	0.220525	0.481158	6.86769	4.58881e-07	6.16585e-05	5.44044
HSPB11	AT	3099	7	NA	NA	0	1	0.4204	0.0662	-0.0682667	0.216663	-4.11235	0.000407173	0.0103835	-1.40686
SSBP3	ES	3144	7	6	8	0	0.9965	0.9003	0.154	0.225921	0.162906	7.6988	6.89102e-08	1.4989e-05	7.37744
DHCR24	AP	3178	2	NA	NA	0	1	0.3466	0.0163	0.00769167	0.00501667	3.25998	0.00336717	0.0469374	-3.47728
DHCR24	AP	3179	1	NA	NA	0	1	0.3466	0.0163	-0.00769167	0.994983	-3.25998	0.00336717	0.0469374	-3.47728
INADL	AT	3237	40.2	NA	NA	0	1	0.5058	0.0799	0.115775	0.104492	8.91404	5.07831e-09	2.06603e-06	10.0498
INADL	AT	3239	47.3	NA	NA	0	1	0.5707	0.1002	-0.138446	0.831152	-7.70626	6.77753e-08	1.48774e-05	7.39443
ROR1	AT	3274	8.2	NA	NA	0	1	0.6576	0.091	0.0839042	0.0834521	3.45784	0.00207864	0.0337264	-3.00925
ROR1	AT	3275	10	NA	NA	0	1	0.6576	0.091	-0.0839042	0.916548	-3.45784	0.00207864	0.0337264	-3.00925
LEPR	AT	3295	22	NA	NA	0	1	0.8043	0.172	-0.343292	0.388396	-10.3815	2.81088e-10	1.99201e-07	13.0223
LEPR	AT	3297	21	NA	NA	0	1	0.8164	0.1764	0.353454	0.59819	10.738	1.44779e-10	1.29823e-07	13.7043
LEPR	AT	3298	23	NA	NA	0	1	0.0244	0.0049	-0.00964583	0.0118104	-8.89277	5.30655e-09	2.13907e-06	10.0047
WDR78	AT	3330	18	NA	NA	0	0.986	0.9431	0.1647	-0.183748	0.794628	-4.68418	0.000106359	0.00390409	-0.0284645
WLS	AT	3361	13	NA	NA	0	1	0.5169	0.081	0.0603875	0.716885	3.52746	0.00175159	0.0297112	-2.84238
WLS	AT	3362	14	NA	NA	0	1	0.5115	0.0797	-0.0699333	0.256867	-4.56812	0.000128946	0.00446465	-0.262518
SRSF11	AA	3379	15.1	14	15.2	0	1	0.4912	0.051	-0.0482917	0.6304	-3.70892	0.00111782	0.0217129	-2.40285
PTGER3	AT	3415	4	NA	NA	0	1	0.6781	0.1374	-0.177204	0.291344	-4.88133	5.85179e-05	0.00255837	0.528746
FPGT	AD	3453	2.2	2.1	4	0	0.9442	0.7035	0.0849	-0.101939	0.150523	-3.76905	0.00101904	0.0201869	-2.27595
CRYZ	ES	3467	8	7	9	0	1	1	0.0968	-0.0656375	0.946973	-4.59574	0.000120261	0.00427069	-0.192825
USP33	AT	3530	22.2	NA	NA	0	1	0.1801	0.0259	0.0201833	0.0329458	3.69304	0.00116279	0.0223005	-2.44154
USP33	AT	3531	25	NA	NA	0	1	0.1801	0.0259	-0.0201875	0.967056	-3.69446	0.00115871	0.0222807	-2.4381
USP33	ES	3534	2	1	3	0	1	0.5438	0.092	0.119967	0.783821	5.7258	7.12282e-06	0.000546139	2.65269
NEXN	ES	3541	3	2	4	0	0.7871	0.825	0.1497	-0.122033	0.397893	-3.34099	0.00315613	0.0448638	-3.30827
PRKACB	AP	3585	2	NA	NA	0	0.9808	0.9828	0.2095	-0.16523	0.659487	-3.73275	0.00111378	0.0216536	-2.36344
ODF2L	ES	3675	15	14	17	0	1	0.8938	0.1843	-0.1436	0.8094	-4.97924	4.57397e-05	0.00213799	0.776185
2020-09-15	ES	3687	5	4	6	0	1	0.2848	0.0304	-0.025825	0.951929	-3.73827	0.00103909	0.0205009	-2.33117
2020-09-15	ES	3688	3	2	4	0	1	0.0379	0.0048	-0.00515	0.0093125	-3.23619	0.00356653	0.0489033	-3.53286
HS2ST1	AT	3691	8	NA	NA	0	1	0.3883	0.0567	0.0571833	0.860142	5.30059	2.04452e-05	0.001182	1.58694
HS2ST1	AT	3692	6.2	NA	NA	0	1	0.3888	0.0559	-0.0503667	0.118646	-4.65436	0.000103717	0.00386756	-0.0448192
LMO4	AP	3694	1	NA	NA	0	0.9965	0.6916	0.0967	0.0850696	0.7989	3.84705	0.000841496	0.0175231	-2.08727
LMO4	AP	3695	2	NA	NA	0	0.9965	0.6916	0.0967	-0.0850696	0.2011	-3.84705	0.000841496	0.0175231	-2.08727
ZNF644	AP	3731	2	NA	NA	0	0.9372	0.8033	0.1441	0.192181	0.183871	3.97017	0.000718447	0.0153611	-1.84989
ZNF644	AP	3732	1	NA	NA	0	0.9372	0.8033	0.1441	-0.192181	0.816129	-3.97017	0.000718447	0.0153611	-1.84989
TGFBR3	AP	3739	3	NA	NA	0	0.9965	0.7985	0.1894	-0.238704	0.40184	-5.56331	1.23687e-05	0.000807516	2.14094
TGFBR3	AP	3741	4.1	NA	NA	0	0.9965	0.7667	0.1382	0.144252	0.421591	4.20146	0.000351099	0.00941111	-1.2213
TGFBR3	AP	3742	1	NA	NA	0	0.9965	0.7001	0.0999	0.0944391	0.176574	4.44337	0.000192953	0.00611685	-0.624614
TGFBR3	ES	3746	5	4.2	6	0	1	0.6003	0.1352	0.181363	0.725185	5.33392	1.88137e-05	0.00111256	1.67084
RWDD3	ES	3828	2	1	3.1	0	0.9407	1	0.1715	0.134974	0.551202	3.79929	0.00124889	0.0234805	-2.30801
SLC35A3	ES	3863	08:09:00	7	10.1	0	1	0.1158	0.0188	-0.0154583	0.982912	-4.26404	0.000277839	0.00796328	-1.02757
CLCC1	ES	3983	2	1	3.1	0	0.9703	0.8606	0.1369	0.153129	0.505073	4.21156	0.00031715	0.00883075	-1.15902
AHCYL1	AP	4088	2.1	NA	NA	0	0.9983	0.6818	0.1302	0.103642	0.119058	3.42761	0.00223856	0.0354642	-3.08138
AHCYL1	AP	4089	1	NA	NA	0	0.9983	0.6818	0.1302	-0.103642	0.880942	-3.42761	0.00223856	0.0354642	-3.08138
ST7L	AT	4205	18	NA	NA	0	1	0.651	0.1112	-0.110558	0.818813	-4.09697	0.000423243	0.0105963	-1.44521
ST7L	AT	4207	16.2	NA	NA	0	1	0.651	0.1112	0.110558	0.181188	4.09697	0.000423243	0.0105963	-1.44521
CSDE1	ES	4333	6	5	7	0	1	0.4322	0.0472	0.0499625	0.163631	8.70545	7.83575e-09	2.89317e-06	9.60488
SLC22A15	AT	4354	12	NA	NA	0	1	0.4195	0.071	-0.0587875	0.91844	-3.36707	0.00259556	0.0393526	-3.22516
SLC22A15	AT	4355	6.3	NA	NA	0	1	0.4195	0.071	0.0587875	0.0815604	3.36707	0.00259556	0.0393526	-3.22516
GDAP2	AT	4377	14	NA	NA	0	1	0.5208	0.0997	-0.100117	0.6875	-5.38944	1.63833e-05	0.000990163	1.81044
GDAP2	AT	4378	13.2	NA	NA	0	1	0.5208	0.0997	0.100117	0.3125	5.38944	1.63833e-05	0.000990163	1.81044
PDE4DIP	AP	4407	3	NA	NA	0	1	0.8482	0.1693	-0.172792	0.765875	-4.61981	0.00011317	0.00408023	-0.132071
RNF115	ES	7297	3	2	4	0	0.9913	0.4969	0.0586	-0.0824958	0.124794	-3.77481	0.000948702	0.0191475	-2.24176
NBPF11	ES	7345	5	4	8.1	0	0.7801	1	0.1667	0.1679	0.64694	3.71741	0.00271048	0.0405216	-2.71663
NBPF12	ES	7361	6	5	7	0	0.9389	0.747	0.1442	0.136961	0.640652	3.65384	0.00187049	0.0311782	-2.66014
FMO5	AP	7365	1	NA	NA	0	0.9354	0.513	0.0685	0.04875	0.033725	3.66654	0.0015717	0.0274715	-2.58206
FMO5	AP	7366	2.1	NA	NA	0	0.9354	0.513	0.0685	-0.04875	0.966275	-3.66654	0.0015717	0.0274715	-2.58206
FMO5	AT	7367	11	NA	NA	0	1	0.8137	0.1145	0.1347	0.0994083	5.03959	3.9304e-05	0.00191669	0.928638
FMO5	AT	7368	10	NA	NA	0	1	0.7163	0.099	-0.133058	0.374158	-7.50575	1.06183e-07	1.97689e-05	6.9352
MTMR11	AP	7412	1	NA	NA	0	0.9878	0.8807	0.2077	-0.226513	0.805732	-4.72827	9.53851e-05	0.00365391	0.0807673
MTMR11	AP	7413	2.1	NA	NA	0	0.9878	0.8807	0.2077	0.226513	0.194268	4.72827	9.53851e-05	0.00365391	0.0807673
APH1A	AA	7446	2.1	1	2.2	0	1	0.0657	0.0087	-0.00805417	0.98469	-3.29596	0.0030859	0.04418	-3.39289
ENSA	AP	7490	1	NA	NA	0	1	0.1697	0.0267	-0.0308083	0.962504	-5.37506	1.69803e-05	0.00101923	1.77431
ENSA	AP	7491	2	NA	NA	0	1	0.1697	0.0267	0.0308083	0.0374958	5.37506	1.69803e-05	0.00101923	1.77431
ARNT	ES	7513	7	6	8	0	0.9825	0.5625	0.0982	-0.103833	0.833408	-3.78503	0.000924843	0.0187879	-2.21672
CERS2	AT	7527	12	NA	NA	0	1	0.1556	0.0209	0.0169125	0.0414438	5.15937	2.91042e-05	0.00152417	1.23101
CERS2	AT	7528	11	NA	NA	0	1	0.1556	0.0209	-0.0169125	0.958556	-5.15937	2.91042e-05	0.00152417	1.23101
SCNM1	AP	7563	1	NA	NA	0	1	0.4273	0.0769	-0.116929	0.150477	-5.64764	8.63653e-06	0.000623029	2.45762
SCNM1	AP	7564	2.1	NA	NA	0	1	0.4273	0.0769	0.116933	0.849525	5.64797	8.62967e-06	0.000623029	2.45842
PIP5K1A	ES	7580	3	2.2	4	0	0.986	0.4505	0.0767	-0.0933792	0.187831	-4.10167	0.000418264	0.0105243	-1.43349
PIP5K1A	AA	7583	2.1	1.1	2.2	0	0.9668	0.7267	0.0969	-0.092225	0.355137	-4.84487	6.41476e-05	0.00274442	0.436574
PI4KB	ES	7591	5	4	6	0	0.9895	0.5996	0.1067	-0.136583	0.407208	-7.01449	3.26166e-07	4.64568e-05	5.78873
PI4KB	ES	7592	3	2	4	0	0.9895	0.954	0.1414	0.1258	0.4205	4.56841	0.00012885	0.00446465	-0.261774
PI4KB	ES	7599	02:03:00	1	4	0	0.9913	0.8403	0.1514	0.202333	0.488304	5.21914	2.50598e-05	0.00138725	1.38175
TUFT1	ES	7640	3	1	4	0	0.9564	0.8825	0.1654	-0.207861	0.746634	-3.73822	0.00109897	0.0214702	-2.35027
SNX27	AA	7646	12.1	11	12.2	0	0.9913	0.9171	0.1479	0.146487	0.479348	4.28253	0.000265182	0.00766552	-0.981222
S100A4	AP	7711	2	NA	NA	0	1	0.8452	0.0866	-0.0691208	0.948331	-3.80894	0.000871283	0.0179095	-2.15805
S100A4	AP	7713	4	NA	NA	0	1	0.8452	0.0865	0.0692	0.0515042	3.81597	0.00085614	0.0177272	-2.1408
S100A4	ES	7714	3	2	5	0	1	0.1317	0.0197	0.0192125	0.0343813	3.66433	0.00124871	0.0234805	-2.51143
S100A2	AP	7717	2	NA	NA	0	0.9895	0.7195	0.1253	-0.164195	0.186261	-3.52273	0.00195514	0.0322225	-2.87844
S100A2	AP	7720	3	NA	NA	0	0.9895	0.832	0.1466	0.200282	0.707998	3.76224	0.00110106	0.0214919	-2.31396
S100A13	AP	7733	4	NA	NA	0	0.9965	0.4792	0.0824	-0.123533	0.185875	-8.84387	5.87224e-09	2.28331e-06	9.90079
JTB	RI	7777	1.2	1.1	1.3	0	1	0.0842	0.0148	0.0163083	0.973608	4.1701	0.000352078	0.00941303	-1.26272
C1orf43	ES	7800	4	3	5	0	1	0.5768	0.0474	-0.0345833	0.912488	-3.61514	0.00141058	0.0255896	-2.63079
C1orf43	ES	7808	2	1	3	0	1	0.5729	0.0776	-0.0594292	0.746798	-3.89624	0.00070048	0.0151003	-1.94314
ADAR	AP	7837	2	NA	NA	0	0.9703	0.6678	0.1144	-0.107512	0.482485	-4.50755	0.000150257	0.00502817	-0.415269
ADAR	AP	7838	1	NA	NA	0	0.9703	0.6678	0.1144	0.107512	0.517515	4.50755	0.000150257	0.00502817	-0.415269
KCNN3	AP	7840	1	NA	NA	0	0.9773	1	0.3102	-0.35415	0.659667	-4.78803	9.20829e-05	0.00357731	0.160796
KCNN3	AP	7841	3	NA	NA	0	0.9773	0.9815	0.3177	0.371186	0.314187	5.05006	4.90535e-05	0.00224746	0.795546
SHC1	AP	7854	1	NA	NA	0	1	0.978	0.193	-0.143458	0.577254	-3.60054	0.00146247	0.0261898	-2.66613
SHC1	AP	7855	2.1	NA	NA	0	1	0.978	0.193	0.143458	0.422746	3.60054	0.00146247	0.0261898	-2.66613
ADAM15	ES	7897	21.1:21.2	20	22.1	0	0.9808	0.9526	0.1683	-0.192836	0.648083	-4.54562	0.000165396	0.00543136	-0.427437
ADAM15	ES	7898	21.2	20	22.1	0	0.9808	1	0.1569	-0.185467	0.656964	-4.20488	0.000411829	0.0104054	-1.2955
ADAM15	ES	7905	22.1	20	23	0	0.9913	0.8382	0.1676	0.214355	0.22853	8.51368	2.37995e-08	6.83465e-06	8.59003
SLC50A1	ES	7942	5	4	6	0	1	0.2197	0.0281	-0.0210833	0.969592	-3.4426	0.00215785	0.0345717	-3.04566
SLC50A1	ES	7944	4	3	5	0	1	0.4518	0.0562	0.0437	0.835246	3.83356	0.000819338	0.0171726	-2.09755
TRIM46	AT	7951	11	NA	NA	0	1	0.6566	0.1127	-0.161442	0.531933	-5.14384	3.02591e-05	0.00156231	1.19183
TRIM46	AT	7953	13	NA	NA	0	1	0.6924	0.1233	0.171854	0.284094	5.57179	1.04178e-05	0.000707476	2.26792
MUC1	AA	8017	3.3	2.2	3.4	0	0.7627	0.7404	0.1025	-0.11192	0.915721	-4.37767	0.000572869	0.013213	-1.28557
MUC1	ES	8018	2.3:3.1	2.2	3.2	0	1	0.235	0.0189	0.021175	0.980225	4.33449	0.000232595	0.00694475	-0.850793
MUC1	ES	8019	2.3:3.1:3.2	2.2	3.3	0	1	0.3486	0.031	0.0448958	0.965715	5.76127	6.52767e-06	0.000507633	2.74106
MTX1	ES	8038	4	3	5	0	1	0.1968	0.0301	-0.0254458	0.97014	-3.6446	0.00131132	0.024269	-2.55936
SCAMP3	ES	8052	2	1	3	0	1	0.447	0.0535	-0.0595292	0.898177	-4.3469	0.000225427	0.00677648	-0.819638
RUSC1	AP	8077	1	NA	NA	0	0.9913	0.8122	0.173	-0.204042	0.395575	-3.75143	0.00100561	0.0199805	-2.299
RUSC1	AP	8078	3.1	NA	NA	0	0.9913	0.8122	0.173	0.204042	0.604425	3.75143	0.00100561	0.0199805	-2.299
RUSC1	RI	8080	3.3	3.2	3.4	0	0.986	0.8206	0.1189	-0.177477	0.587587	-4.19647	0.000385408	0.00998221	-1.27303
YY1AP1	AA	8104	12.1	11	12.2	0	1	0.5523	0.0923	0.130263	0.572948	7.74587	6.20622e-08	1.42026e-05	7.48454
DAP3	AD	8123	2.3	2.2	3	0	1	0.5003	0.0807	-0.067175	0.447779	-3.40975	0.0023386	0.0365151	-3.1239
RAB25	ES	8171	2	1	3	1	0.9389	0.2597	0.0471	-0.0584524	0.910893	-4.27112	0.000351969	0.00941303	-1.13854
RRNAD1	ES	8311	5	4	6	0	1	0.4943	0.0821	0.095925	0.806471	4.9366	5.09175e-05	0.0023064	0.668441
ARHGEF11	ES	8338	39	38	40	1	0.9895	0.8836	0.1916	-0.239274	0.606623	-6.111	3.34368e-06	0.000296797	3.46894
DCAF8	ES	8443	8.1:8.2	7.3	9	1	0.9476	0.5088	0.0976	-0.0960348	0.728202	-3.54791	0.00174815	0.0297026	-2.8057
PEX19	ES	8457	3	1	4	0	1	0.2409	0.032	0.0528333	0.933954	6.40047	1.38438e-06	0.000146218	4.31557
F11R	AP	8516	1	NA	NA	0	0.9965	1	0.1315	-0.0785087	0.622747	-3.64059	0.00139508	0.0254028	-2.58466
F11R	AP	8517	4.1	NA	NA	0	0.9965	1	0.1315	0.0785087	0.377253	3.64059	0.00139508	0.0254028	-2.58466
TSTD1	ES	8526	2.2:2.3	1	3.1	0	0.9738	1	0.2088	-0.295724	0.527287	-5.67252	1.33635e-05	0.000854679	2.16533
TSTD1	ES	8527	2.3	1	3.1	0	0.9965	0.4892	0.0627	-0.0714773	0.93943	-4.64233	0.000130898	0.00452509	-0.192738
PVRL4	ES	8552	8	7	9	0	0.9773	0.7495	0.13	-0.194578	0.722019	-6.25057	2.40817e-06	0.000230022	3.80296
PPOX	AT	8567	14	NA	NA	0	1	0.637	0.1009	0.0877083	0.193337	3.65659	0.00127291	0.0237659	-2.53024
PPOX	AT	8568	13	NA	NA	0	1	0.637	0.1009	-0.0877042	0.806665	-3.65635	0.00127365	0.0237659	-2.53081
SDHC	ES	8663	3	2	5	0	1	0.1248	0.0152	-0.0212625	0.96619	-4.47597	0.000162732	0.00535989	-0.494861
FCGR3A	AP	8672	4.1	NA	NA	0	0.9267	0.3904	0.0528	0.0605091	0.0878261	5.69388	1.06726e-05	0.000718119	2.34052
FCGR3A	AP	8674	1	NA	NA	0	0.9267	0.8367	0.0859	-0.0889409	0.816854	-4.80802	8.77522e-05	0.0034642	0.209272
UAP1	ES	8750	9.1:9.2	8	10	0	1	0.4842	0.0786	0.0931083	0.812512	3.72681	0.00106916	0.0209862	-2.35918
UAP1	ES	8751	9.2	8	10	0	0.9965	0.8653	0.1513	0.215713	0.518827	5.58847	9.99675e-06	0.00069175	2.30965
PBX1	AT	8785	14	NA	NA	0	1	0.1432	0.0167	-0.0132417	0.0328833	-3.62109	0.00138995	0.0253408	-2.61637
MGST3	ES	8802	3	1.2	5	0	1	0.0725	0.013	-0.00706667	0.0182833	-3.46811	0.00202689	0.0331686	-2.9847
TMCO1	AP	8805	4.1	NA	NA	0	1	0.2472	0.0215	-0.0185333	0.98255	-3.37604	0.00253939	0.038755	-3.20392
TMCO1	AP	8806	1	NA	NA	0	1	0.2472	0.0215	0.0185333	0.01745	3.37604	0.00253939	0.038755	-3.20392
POGK	ES	8824	4	3	5	0	0.993	0.2029	0.0174	0.0191042	0.985506	3.65438	0.00127989	0.0238304	-2.5356
POGK	ES	8825	04:05:00	3	6.1	0	0.9983	0.3567	0.0384	0.0293167	0.949471	3.43923	0.00217572	0.0347625	-3.05368
RCSD1	ES	8870	3	2	4	0	0.9354	0.5028	0.1005	0.14765	0.830557	6.15166	3.69951e-06	0.000323556	3.41881
MPZL1	ES	8871	5	4	6	0	1	0.2599	0.0419	0.0630417	0.90955	5.19476	2.6636e-05	0.0014369	1.32028
PRRC2C	ES	8988	34	33	35	0	1	1	0.1138	0.107058	0.169479	4.82191	6.79676e-05	0.0028715	0.378551
KIAA0040	AP	9045	1	NA	NA	0	0.9686	0.5531	0.1083	-0.196921	0.233431	-8.29724	1.86168e-08	5.61917e-06	8.71763
KIAA0040	AP	9046	2	NA	NA	0	0.9686	0.5531	0.1083	0.196921	0.766569	8.29724	1.86168e-08	5.61917e-06	8.71763
SEC16B	AT	9070	16.2	NA	NA	0	0.9965	0.22	0.0235	0.0329917	0.0273333	3.31636	0.00293675	0.0428938	-3.34492
SEC16B	AT	9071	28	NA	NA	0	0.9965	0.22	0.0235	-0.0329917	0.972667	-3.31636	0.00293675	0.0428938	-3.34492
TOR1AIP1	ES	9126	9	8	10	0	0.993	0.1419	0.017	-0.0217833	0.0221792	-3.82405	0.00083903	0.0174966	-2.12093
QSOX1	RI	9130	12.2	12.1	12.3	0	1	0.4949	0.0841	-0.0775083	0.838496	-5.50008	1.24441e-05	0.000810026	2.08824
MR1	ES	9138	4	3.2	5	0	1	0.7015	0.1055	0.084875	0.503033	3.72671	0.00106942	0.0209862	-2.35941
GLUL	AD	9148	1.3:1.4	1.2	2	0	0.993	0.9844	0.2524	0.296654	0.406531	5.28102	2.1469e-05	0.00123147	1.53766
GLUL	AD	9152	1.2	1.1	2	0	1	0.1363	0.0218	-0.0261458	0.0390146	-5.73694	6.93024e-06	0.000532344	2.68045
ARPC5	AT	9190	5	NA	NA	0	1	0.0307	0.0035	-0.00264583	0.00496042	-3.39685	0.00241356	0.0373667	-3.15456
ARPC5	AT	9191	4	NA	NA	0	1	0.0307	0.0035	0.00264583	0.99504	3.39685	0.00241356	0.0373667	-3.15456
HMCN1	ES	9219	104	103	105	0	0.9686	0.9089	0.1301	0.121383	0.522166	5.20523	2.95307e-05	0.00154283	1.2609
UCHL5	AT	9239	14	NA	NA	0	1	0.4751	0.0718	0.0844917	0.192263	4.93768	5.07794e-05	0.002303	0.671168
UCHL5	AT	9240	15	NA	NA	0	1	0.5339	0.0811	-0.125554	0.776073	-4.91773	5.33946e-05	0.0023877	0.620732
CFH	AT	9275	23	NA	NA	0	1	0.5757	0.0982	0.132342	0.697133	8.9617	4.60287e-09	1.91453e-06	10.1507
CFH	AT	9276	10	NA	NA	0	1	0.5757	0.0982	-0.132342	0.302867	-8.9617	4.60287e-09	1.91453e-06	10.1507
TMEM9	AP	9351	3.1	NA	NA	0	0.993	0.2394	0.0284	0.0180045	0.0337087	3.51821	0.00197633	0.0325313	-2.889
PPP1R12B	AP	9411	1	NA	NA	0	0.8726	1	0.2714	-0.298367	0.689195	-4.51489	0.000437257	0.0108728	-1.00954
PPP1R12B	AP	9412	14	NA	NA	0	0.8726	1	0.2714	0.298367	0.310805	4.51489	0.000437257	0.0108728	-1.00954
KDM5B	ES	9420	6	5	7	0	1	0.84	0.171	-0.183279	0.489744	-4.50852	0.000149888	0.00502733	-0.412819
FAM72A	AP	9575	1	NA	NA	0	1	0.9028	0.2216	-0.528412	0.463927	-12.9533	3.20944e-12	8.42337e-09	17.6214
FAM72A	AP	9576	3.1	NA	NA	0	1	0.9028	0.2216	0.528417	0.536075	12.9532	3.20975e-12	8.42337e-09	17.6213
FAM72A	AT	9577	2	NA	NA	0	1	0.7376	0.1777	-0.406667	0.367546	-13.1364	2.39518e-12	8.09534e-09	17.9223
FAM72A	AT	9578	6	NA	NA	0	1	0.8002	0.1949	0.443329	0.55954	14.1216	5.2256e-13	2.62205e-09	19.4875
CTSE	AA	9582	5.1	4	5.2	0	0.8918	0.1246	0.015	-0.0188955	0.0225804	-4.13194	0.000450634	0.0110862	-1.42871
PFKFB2	AP	9612	2	NA	NA	0	0.9686	0.8301	0.1284	-0.0954435	0.642806	-3.38532	0.00259024	0.0392995	-3.18936
PFKFB2	AP	9613	1	NA	NA	0	0.9686	0.89	0.1362	0.135713	0.302583	4.88488	6.48226e-05	0.00276254	0.468766
PFKFB2	AT	9616	18	NA	NA	0	1	0.5791	0.0951	-0.0851208	0.342565	-3.63914	0.00132919	0.0244769	-2.57262
PFKFB2	AT	9617	17	NA	NA	0	1	0.5791	0.0951	0.0851208	0.657435	3.63914	0.00132919	0.0244769	-2.57262
CD55	AT	9631	15	NA	NA	0	1	0.4328	0.0636	-0.0602708	0.889165	-5.97654	3.85357e-06	0.000334263	3.27537
CD55	AT	9632	10.2	NA	NA	0	1	0.4328	0.0636	0.0602667	0.110833	5.97617	3.85706e-06	0.000334263	3.27446
LAMB3	AP	9671	3.1	NA	NA	0	0.9948	1	0.0829	0.0821417	0.0516792	3.94588	0.000618575	0.0138597	-1.82046
LAMB3	AP	9672	1	NA	NA	0	0.9948	1	0.0846	-0.0905417	0.942967	-3.52478	0.0017632	0.02978	-2.84883
NEK2	AT	9717	8	NA	NA	0	1	0.7704	0.169	0.31465	0.594658	9.42167	1.80967e-09	8.93406e-07	11.109
NEK2	AT	9718	7.2	NA	NA	0	1	0.7704	0.169	-0.31465	0.405342	-9.42167	1.80967e-09	8.93406e-07	11.109
NSL1	AT	9742	7	NA	NA	0	1	0.2701	0.0395	0.0319625	0.93471	5.5265	1.16549e-05	0.000768911	2.15446
NSL1	AT	9743	8	NA	NA	0	1	0.2701	0.0395	-0.0319625	0.0652896	-5.5265	1.16549e-05	0.000768911	2.15446
GPATCH2	AT	9838	11	NA	NA	0	1	0.7773	0.1328	-0.0989958	0.348198	-3.23006	0.00361977	0.0493318	-3.54717
GPATCH2	AT	9839	6	NA	NA	0	1	0.7773	0.1328	0.0989958	0.651802	3.23006	0.00361977	0.0493318	-3.54717
TAF1A	AT	9883	13	NA	NA	0	1	0.7286	0.1225	-0.1445	0.624938	-6.05784	3.16187e-06	0.00028588	3.47616
TAF1A	AT	9884	8	NA	NA	0	1	0.4401	0.0865	0.0942292	0.154777	5.86082	5.11286e-06	0.0004122	2.98861
CAPN8	AT	9920	22	NA	NA	0	0.9895	0.7309	0.1032	-0.131687	0.769802	-3.78982	0.000968441	0.0194387	-2.2258
CAPN8	AT	9921	11	NA	NA	0	0.9895	0.7309	0.1032	0.131687	0.230198	3.78982	0.000968441	0.0194387	-2.2258
CNIH4	ES	9958	4	3	5.1	0	1	0.0927	0.0151	-0.0152292	0.968915	-3.60485	0.00144696	0.0260027	-2.65571
DNAH14	ES	9984	6	5	7	0	0.9825	0.3754	0.0483	-0.0321565	0.972857	-3.2653	0.00345411	0.0477104	-3.46881
ENAH	ES	9989	13	12	14	0	1	1	0.1875	0.3273	0.545721	9.22112	2.70963e-09	1.21486e-06	10.6946
GUK1	AP	10180	1	NA	NA	0	1	0.0615	0.0116	-0.0236125	0.0266937	-6.69058	6.95241e-07	8.48541e-05	5.01688
GUK1	ES	10185	11.1:11.2	9.2	12	0	1	0.1152	0.0193	-0.0123875	0.965369	-3.22814	0.00363658	0.04953	-3.55164
TTC13	ME	10258	9|10	8	11	0	0.9424	1	0.2474	0.18789	0.715102	4.82022	0.0001094	0.00397994	0.0857276
ARV1	AT	10261	6	NA	NA	0	1	0.2443	0.0382	0.0257542	0.0581229	3.25258	0.00342797	0.0474623	-3.49458
ARV1	AT	10262	7	NA	NA	0	1	0.2443	0.0382	-0.0257542	0.941877	-3.25258	0.00342797	0.0474623	-3.49458
C1orf131	AA	10273	3.1	2	3.2	0	0.9843	0.6741	0.0915	-0.106255	0.753052	-3.62004	0.00154927	0.0272421	-2.65018
NTPCR	AT	10316	5	NA	NA	0	1	0.4385	0.0732	0.0956667	0.112479	7.97552	3.74013e-08	9.74038e-06	8.00295
NTPCR	AT	10317	6	NA	NA	0	1	0.4385	0.0732	-0.0956625	0.887519	-7.97457	3.74797e-08	9.74038e-06	8.0008
NTPCR	ES	10319	2	1	3	1	0.808	0.7382	0.0999	0.08221	0.872539	4.33394	0.000335128	0.00915725	-1.0421
IRF2BP2	AD	10338	1.2	1.1	2	0	1	0.4626	0.0709	-0.0752292	0.532419	-4.55603	0.000132944	0.0045814	-0.29302
B3GALNT2	ES	10354	4	3	5	0	0.9825	0.3494	0.0627	-0.0448917	0.961229	-3.34516	0.00273802	0.0408638	-3.277
LGALS8	ES	10382	11	10.1	12	0	1	0.9472	0.1674	0.128204	0.479277	4.61296	0.000115144	0.00412871	-0.149356
SDCCAG8	ES	10458	6	5	7	0	1	0.3761	0.0663	-0.0412167	0.917404	-3.74406	0.00102425	0.0202535	-2.31704
COX20	ES	10475	3	1	4	1	0.9965	0.5245	0.0783	0.0677913	0.816691	4.75445	8.94134e-05	0.00350582	0.14565
HNRNPU	AD	10476	1.2	1.1	2	0	0.993	0.5304	0.0786	-0.0468957	0.330379	-3.34273	0.00286954	0.0422244	-3.28893
ZNF670	AT	10507	4	NA	NA	0	1	0.6863	0.1371	-0.118154	0.920815	-3.90788	0.000680354	0.0147872	-1.91439
ZNF670	AT	10509	11	NA	NA	0	1	0.5705	0.1165	0.0962667	0.0682417	4.12701	0.000392424	0.0101306	-1.3703
ZMYND11	AT	10584	17.2	NA	NA	0	1	0.1092	0.0122	0.0119208	0.0181104	3.50864	0.0018347	0.030698	-2.8876
ZMYND11	AT	10585	18	NA	NA	0	1	0.1092	0.0122	-0.0119167	0.981888	-3.50618	0.00184582	0.0308607	-2.8935
IDI1	ES	10610	2	1	3	1	0.9634	0.3512	0.0662	0.0550435	0.856496	4.24708	0.000313634	0.00877411	-1.10903
IL15RA	ES	10679	4	3	5	0	0.9913	0.6098	0.0849	0.0699375	0.718035	3.23214	0.00360158	0.0492058	-3.5423
ITIH5	AT	10715	16.2	NA	NA	0	1	0.7661	0.1575	-0.230408	0.562992	-7.2006	2.12418e-07	3.3816e-05	6.22658
ITIH5	AT	10716	13	NA	NA	0	1	0.7661	0.1575	0.230408	0.437008	7.2006	2.12418e-07	3.3816e-05	6.22658
ATP5C1	ES	10726	9	8.1	10	0	1	0.4211	0.0635	0.105654	0.871448	7.38846	1.38413e-07	2.37876e-05	6.66421
CELF2	RI	10739	16.2	16.1	16.3	0	1	0.9426	0.1766	-0.139154	0.442965	-4.54875	0.000135411	0.00465548	-0.311392
CELF2	AD	10744	12.2	12.1	14.2	0	0.8499	0.8603	0.1265	0.134836	0.351304	4.11672	0.000467564	0.0113753	-1.46541
CAMK1D	AT	10772	11	NA	NA	0	1	0.5997	0.0988	-0.0933167	0.719667	-3.60757	0.00143727	0.0259267	-2.64913
CAMK1D	AT	10773	10.2	NA	NA	0	1	0.5997	0.0988	0.0933167	0.280333	3.60757	0.00143727	0.0259267	-2.64913
SEPHS1	ES	10796	2	1	3	0	1	0.0831	0.0149	0.0197875	0.983131	3.86404	0.000759254	0.0160841	-2.02255
HSPA14	AT	10830	15	NA	NA	0	1	0.845	0.1073	-0.0790167	0.482692	-4.32211	0.00023998	0.0071245	-0.881898
HSPA14	AT	10831	4	NA	NA	0	1	0.845	0.1073	0.0790167	0.517308	4.32211	0.00023998	0.0071245	-0.881898
DCLRE1C	ES	10839	8	7	9	0	0.8307	0.7105	0.1207	0.125006	0.850044	3.36919	0.00349952	0.0481258	-3.2799
RPP38	AD	10862	1.2	1.1	2	0	0.9825	1	0.1525	0.171968	0.40732	3.89044	0.00080829	0.0169764	-2.00855
RPP38	ES	10863	1.2:2	1.1	3.1	0	0.993	1	0.1553	0.165368	0.412161	3.98528	0.000642726	0.0142206	-1.78146
VIM	AP	10927	1	NA	NA	0	0.8866	0.8697	0.1719	-0.222833	0.283725	-4.32772	0.000307775	0.0086686	-1.0043
VIM	AP	10928	3.1	NA	NA	0	0.8866	0.8697	0.1719	0.222833	0.716275	4.32772	0.000307775	0.0086686	-1.0043
KIAA1217	AP	10995	3	NA	NA	0	0.986	0.7047	0.1126	-0.181079	0.175277	-6.70098	6.78411e-07	8.35198e-05	5.04185
KIAA1217	RI	11000	25.2	25.1	25.3	0	1	0.9444	0.1882	0.293846	0.39671	5.6548	8.48537e-06	0.000619973	2.47549
KIAA1217	ES	11001	24	23	25.1	0	1	0.2727	0.0189	0.0231833	0.983812	5.2624	2.24911e-05	0.00127511	1.49076
KIAA1217	ES	11002	23:24:00	22	25.1	0	1	0.5133	0.0954	0.126183	0.840958	3.93881	0.000629635	0.0140431	-1.83795
KIAA1217	ES	11009	12	11	13	0	0.9843	0.9212	0.2089	-0.266437	0.682519	-6.13747	2.60668e-06	0.000243685	3.67224
ABI1	ES	11034	11.1:11.2	9	12	0	0.9948	0.661	0.0828	-0.0663217	0.947928	-4.76423	8.72818e-05	0.00345184	0.169871
ABI1	ES	11035	11.2	9	12	0	0.9756	0.6829	0.1393	-0.111061	0.906889	-4.6127	0.000126914	0.00442918	-0.205544
ABI1	ES	11039	12	9	13	0	0.9302	0.8862	0.152	0.111795	0.101018	3.67765	0.00143446	0.0259125	-2.53451
ABI1	ES	11041	11.1:11.2	9	13	0	0.9983	0.6627	0.1128	-0.0780292	0.765594	-3.32983	0.0028421	0.0418907	-3.31317
ABI1	ES	11048	5	4	7	0	0.9965	0.8859	0.1555	-0.227229	0.411798	-6.67542	7.20534e-07	8.72144e-05	4.98047
YME1L1	AA	11061	3.1:3.2	2	3.3	0	1	0.7966	0.078	0.0528	0.0555	4.07685	0.000445215	0.0109898	-1.49533
ARMC4	ES	11085	24	23	25	0	0.9913	0.7506	0.1592	0.149974	0.826272	3.61046	0.0015014	0.0266755	-2.65669
WAC	AP	11099	1	NA	NA	0	1	0.6922	0.0869	-0.105188	0.319173	-4.09133	0.000429291	0.0107179	-1.45926
SVIL	ES	11114	16	15	17	0	0.9302	0.4435	0.0742	-0.173548	0.135732	-8.09055	3.99816e-08	1.02134e-05	7.99356
ARHGAP12	ES	11153	08:09:00	7	10	0	0.9843	0.6027	0.0973	-0.0789043	0.909347	-3.58083	0.00161369	0.0279914	-2.72736
PARD3	AT	11207	23	NA	NA	0	1	0.7588	0.1426	0.0900417	0.363862	3.32266	0.00289212	0.0424145	-3.33008
PARD3	AT	11208	28	NA	NA	0	1	0.6561	0.1335	-0.170017	0.465942	-5.90702	4.56633e-06	0.00037432	3.10323
PARD3	AT	11209	17	NA	NA	0	1	0.6654	0.0815	0.0799875	0.170202	3.4925	0.00190902	0.0316642	-2.92632
PARD3	ES	11211	20	19.3	21	0	1	0.6602	0.1044	0.245371	0.82704	10.0957	4.83612e-10	3.12484e-07	12.4646
PARD3	AD	11213	19.2:19.3	19.1	20	0	1	0.6732	0.0938	0.0871292	0.817265	3.45906	0.00207242	0.0336877	-3.00633
PARD3	ES	11216	13	12	14	0	0.9983	0.7973	0.1301	-0.169617	0.605738	-5.44363	1.43169e-05	0.000894815	1.94659
CREM	AT	11237	16.2	NA	NA	0	1	0.7672	0.1284	-0.142258	0.660417	-4.10892	0.000410712	0.0104011	-1.41544
CREM	AT	11238	10.2	NA	NA	0	1	0.7808	0.1275	0.120542	0.320321	3.57123	0.00157233	0.0274715	-2.73695
HNRNPF	AP	11324	4	NA	NA	0	1	0.2852	0.0444	-0.0610125	0.130069	-4.51233	0.000148457	0.00500222	-0.403239
HNRNPF	AP	11326	5.1	NA	NA	0	1	0.5132	0.0819	0.0802083	0.189054	5.58474	1.00893e-05	0.000694835	2.30032
CXCL12	AT	11344	4	NA	NA	0	1	0.2512	0.0431	-0.0682125	0.0759104	-5.04643	3.86342e-05	0.00189216	0.945924
2020-03-08	ES	11362	7	6	8	0	0.9808	0.9696	0.1591	0.173788	0.202881	4.76255	7.89408e-05	0.00321157	0.228507
ZFAND4	AT	11366	9.2	NA	NA	0	1	0.68	0.1056	0.0956542	0.161806	4.41761	0.00018857	0.00603014	-0.641816
ZFAND4	AT	11367	13	NA	NA	0	1	0.7399	0.1116	-0.120892	0.696375	-5.57998	1.02088e-05	0.000700215	2.28841
SYT15	AT	11433	8.4	NA	NA	0	1	0.6403	0.1104	-0.130746	0.719706	-4.59853	0.000119415	0.00424504	-0.185774
SYT15	AT	11435	9	NA	NA	0	1	0.6403	0.1104	0.130746	0.280294	4.59853	0.000119415	0.00424504	-0.185774
VSTM4	AT	11498	9	NA	NA	0	1	0.6109	0.1005	-0.0960833	0.851075	-3.43107	0.00221969	0.0353109	-3.07315
VSTM4	AT	11499	3	NA	NA	0	1	0.6109	0.1005	0.0960833	0.148925	3.43107	0.00221969	0.0353109	-3.07315
NCOA4	AP	11537	3	NA	NA	0	0.9965	0.5881	0.1038	-0.0948458	0.31131	-3.54346	0.00168385	0.0289457	-2.80388
FAM21A	ES	11559	28	27	29	0	1	0.2342	0.0309	0.0267292	0.960935	3.58997	0.0015012	0.0266755	-2.6917
FAM21A	ES	11561	1 day, 3:28:00	26	29	0	1	0.1751	0.0171	0.0159542	0.980523	3.22311	0.00368099	0.0499166	-3.56336
PRKG1	AP	11579	2	NA	NA	0	0.9372	0.9463	0.157	0.167582	0.215861	4.57312	0.000154748	0.00516275	-0.360713
PRKG1	AP	11580	1	NA	NA	0	0.9372	0.9463	0.1572	-0.181995	0.777246	-5.37326	2.27076e-05	0.00128573	1.5745
ZWINT	ES	11812	5.2:6.1	5.1	6.2	0	0.9948	0.2454	0.0429	-0.0638522	0.956272	-5.81214	6.80108e-06	0.000524256	2.74743
ANK3	AP	11842	1	NA	NA	0	0.9634	1	0.2732	-0.343227	0.760487	-5.28802	2.77999e-05	0.00148361	1.36961
ANK3	AP	11845	28	NA	NA	0	0.9634	1	0.2665	0.259818	0.188539	4.91087	6.85082e-05	0.00289156	0.458603
ANK3	AT	11846	50	NA	NA	0	1	0.5874	0.0783	-0.0924708	0.937756	-3.50356	0.00185778	0.0310183	-2.8998
ANK3	AT	11847	29.2	NA	NA	0	1	0.5874	0.0783	0.0924708	0.0622438	3.50356	0.00185778	0.0310183	-2.8998
RTKN2	AT	11869	13.2	NA	NA	0	1	0.6651	0.1087	-0.0953	0.558312	-3.73714	0.00104204	0.0205499	-2.33395
HNRNPH3	ES	11933	3	2	4.1	1	0.9372	0.3412	0.0352	0.0275833	0.930713	3.58015	0.00153807	0.0271405	-2.71542
CCAR1	AD	11960	1.2	1.1	2	0	0.9668	0.4835	0.0779	0.0921636	0.132309	4.62563	0.00013629	0.00468202	-0.233264
CDH23	AT	12058	15.2	NA	NA	0	1	0.8715	0.1815	0.187304	0.375315	4.66058	0.000102102	0.00382125	-0.0291142
CDH23	AT	12060	72	NA	NA	0	1	0.8072	0.1475	-0.229946	0.320498	-6.59877	8.63626e-07	9.83057e-05	4.79592
PSAP	AA	12067	8.1	7	8.2	0	1	0.6154	0.0676	0.0312708	0.0537979	3.74805	0.00101412	0.0201167	-2.30728
DNAJB12	RI	12090	9.3	9.2	9.4	0	1	0.6126	0.1055	-0.0833292	0.456244	-4.93414	5.12342e-05	0.00231836	0.662213
P4HA1	ME	12122	10|11	9	12.1	0	1	0.4767	0.0829	-0.06675	0.451612	-3.46962	0.0020194	0.0330829	-2.9811
MRPS16	AT	12135	5	NA	NA	0	1	0.2971	0.0465	0.035575	0.134892	3.58398	0.00152358	0.0269497	-2.70616
MRPS16	AT	12136	3.2	NA	NA	0	1	0.2971	0.0465	-0.035575	0.865108	-3.58398	0.00152358	0.0269497	-2.70616
PPP3CB	AT	12153	17	NA	NA	0	1	0.5556	0.1114	-0.183938	0.702227	-8.69527	8.00455e-09	2.90664e-06	9.58301
PPP3CB	AT	12154	15.2	NA	NA	0	1	0.5556	0.1114	0.183938	0.297773	8.69527	8.00455e-09	2.90664e-06	9.58301
USP54	ES	12166	19	18	20	0	0.9808	0.4149	0.066	0.0932	0.899767	4.94107	5.03489e-05	0.00229009	0.679721
CAMK2G	ES	12249	13	12	14	0	0.9878	0.2412	0.0378	-0.0310087	0.0561957	-3.29225	0.00323861	0.0457402	-3.40637
ADK	ES	12259	8	7	9	0	1	0.1446	0.019	-0.0167458	0.980356	-3.51435	0.0018091	0.0303739	-2.8739
RPS24	ES	12295	5.1:5.2	4	6	0	1	0.9815	0.2163	-0.178296	0.736315	-3.78249	0.000930711	0.0188624	-2.22294
RPS24	ES	12296	5.2	4	6	0	1	0.7852	0.1592	-0.182867	0.783775	-5.1645	2.87329e-05	0.00151193	1.24395
ZMIZ1	ES	12300	24	23	25	0	0.9948	0.5937	0.0898	0.0979875	0.694419	4.36891	0.000213244	0.00658376	-0.764322
NUTM2E	RI	12332	6.2	6.1	6.3	0	0.9616	0.9054	0.1821	0.146357	0.635618	3.67753	0.00143487	0.0259125	-2.53479
FAM213A	AA	12365	3.2	2	3.3	0	0.9948	0.5904	0.0821	-0.0993136	0.699761	-6.2277	3.10974e-06	0.000283476	3.59589
CCSER2	AT	12407	3.2	NA	NA	0	1	0.3085	0.0432	0.0476417	0.0417167	4.10078	0.000419207	0.0105312	-1.43572
CCSER2	AT	12408	12	NA	NA	0	1	0.3085	0.0432	-0.0476417	0.958283	-4.10078	0.000419207	0.0105312	-1.43572
CCSER2	ES	12409	11	10	12	0	0.9895	0.7807	0.125	-0.182432	0.287565	-6.91306	6.71342e-07	8.30913e-05	5.16238
ADIRF	ES	12443	2	1	3	1	0.8534	0.4271	0.0603	-0.0827059	0.933168	-4.4519	0.000368501	0.0097186	-0.971855
PAPSS2	ES	12457	9	8	10	0	0.9546	0.6283	0.1316	-0.136575	0.212354	-4.99313	4.41701e-05	0.00208907	0.811281
PANK1	AP	12493	1	NA	NA	0	0.8778	0.9445	0.2446	0.308188	0.537633	4.79121	0.000213375	0.00658376	-0.348621
PANK1	AP	12494	2	NA	NA	0	0.8778	0.9445	0.2446	-0.308188	0.462367	-4.79121	0.000213375	0.00658376	-0.348621
HHEX	AP	12536	2.1	NA	NA	0	1	0.8294	0.1343	-0.122787	0.229656	-4.59351	0.000120938	0.00427841	-0.198443
HHEX	AP	12537	1	NA	NA	0	1	0.8294	0.1343	0.122787	0.770344	4.59351	0.000120938	0.00427841	-0.198443
EXOC6	AP	12540	3	NA	NA	0	0.9668	0.7427	0.1673	0.383158	0.708083	10.2917	3.3296e-10	2.21661e-07	12.8482
EXOC6	AP	12541	1	NA	NA	0	0.9668	0.7427	0.1673	-0.383158	0.291917	-10.2917	3.3296e-10	2.21661e-07	12.8482
PLCE1	AT	12578	34	NA	NA	0	1	0.4426	0.0777	-0.0951042	0.416865	-5.57973	1.02152e-05	0.000700215	2.28778
PLCE1	AT	12579	33.2	NA	NA	0	1	0.4426	0.0777	0.0951042	0.583135	5.57973	1.02152e-05	0.000700215	2.28778
ENTPD1	AP	12652	2	NA	NA	0	0.9738	0.8493	0.118	-0.0831565	0.14603	-3.40028	0.00249861	0.038386	-3.1543
ENTPD1	AP	12653	3	NA	NA	0	0.9738	0.9904	0.1489	0.0992435	0.76256	4.33834	0.000250233	0.00735433	-0.884042
ZDHHC16	ES	12704	9	8.2	10	0	0.9983	0.5247	0.0675	-0.0818304	0.893413	-8.42713	1.98283e-08	5.88658e-06	8.71331
MMS19	ES	12716	23	22	24	0	1	0.1582	0.0231	0.0199333	0.973604	4.4468	0.000175172	0.00567604	-0.568338
R3HCC1L	ES	12753	7	6	8	0	0.9738	0.2381	0.0428	-0.0412542	0.0550521	-3.54755	0.00166697	0.0287116	-2.79404
HPS1	AT	12760	10.2	NA	NA	0	1	0.6199	0.102	0.148433	0.216242	7.14962	2.38792e-07	3.69439e-05	6.10705
HPS1	AT	12761	20	NA	NA	0	1	0.6199	0.102	-0.148433	0.783758	-7.14962	2.38792e-07	3.69439e-05	6.10705
CUTC	ES	12778	7	6	8	0	0.9913	0.6155	0.1004	-0.0746955	0.865474	-3.64314	0.00146584	0.0262026	-2.59577
POLL	ES	12889	03:04:00	1.5	5.1	0	0.993	0.413	0.0651	-0.0775182	0.936409	-3.78072	0.00105313	0.0207407	-2.27005
LDB1	AP	12934	2	NA	NA	0	1	0.8124	0.164	0.332567	0.314671	11.3925	4.44956e-11	5.43069e-08	14.9175
LDB1	AP	12935	1	NA	NA	0	1	0.8124	0.164	-0.332567	0.685329	-11.3925	4.44956e-11	5.43069e-08	14.9175
PPRC1	ES	12938	08:09:00	7	10	0	1	0.2495	0.0397	0.0731292	0.938294	7.65089	7.66801e-08	1.60437e-05	7.26813
NT5C2	ES	12992	5	4	6	0	0.9878	0.7026	0.0893	-0.0954333	0.210592	-3.98531	0.000560332	0.0130057	-1.72279
SH3PXD2A	AP	13023	9	NA	NA	0	0.829	0.9132	0.185	-0.2439	0.288755	-3.95614	0.0013274	0.024471	-2.13995
SH3PXD2A	AT	13024	18	NA	NA	0	1	0.1537	0.0211	-0.0334417	0.0456	-5.43978	1.44547e-05	0.000900865	1.93692
SH3PXD2A	AT	13025	17	NA	NA	0	1	0.1537	0.0211	0.0334417	0.9544	5.43978	1.44547e-05	0.000900865	1.93692
SLK	ES	13030	13	12	14	0	1	1	0.1598	0.187871	0.64989	5.56611	1.05655e-05	0.000712222	2.25368
SFR1	AP	13035	2	NA	NA	0	0.9634	0.9602	0.2016	0.240829	0.417761	5.25411	3.49323e-05	0.00176015	1.1891
SFR1	AP	13037	1	NA	NA	0	0.9634	0.9742	0.1826	-0.290395	0.461595	-6.9279	8.44156e-07	9.65899e-05	4.98836
WDR96	AT	13039	11.2	NA	NA	0	0.8604	1	0.1409	0.130895	0.109172	4.05738	0.00069647	0.0150524	-1.72536
WDR96	AT	13040	38	NA	NA	0	0.8604	1	0.2047	-0.230868	0.819181	-4.1915	0.000514303	0.0121688	-1.42154
ADD3	ES	13077	15	14	16	0	0.9913	0.8932	0.1987	0.283596	0.544244	8.08896	2.91995e-08	8.12005e-06	8.25648
MXI1	AP	13079	3	NA	NA	0	0.993	0.9842	0.2133	-0.344546	0.678473	-7.64632	7.74668e-08	1.61314e-05	7.25769
MXI1	AP	13080	1	NA	NA	0	0.993	1	0.2038	0.304325	0.266521	7.58302	8.92567e-08	1.72765e-05	7.11278
TCF7L2	ES	13141	17	14	19	0	0.9372	0.5953	0.1198	0.14878	0.752566	4.19375	0.000463629	0.0112983	-1.36737
TCF7L2	ES	13156	4	3	5	0	0.9773	0.8771	0.1428	0.157142	0.567042	4.69423	9.37888e-05	0.00362755	0.0558826
C10orf118	AT	13185	3.2	NA	NA	0	1	0.4486	0.0648	0.061475	0.0828	3.98811	0.000556398	0.0129526	-1.71583
C10orf118	AT	13186	17	NA	NA	0	1	0.4486	0.0648	-0.0614708	0.917198	-3.98799	0.000556567	0.0129526	-1.71613
ABLIM1	AA	13208	18.1	17	18.2	0	0.8988	0.8082	0.141	-0.315076	0.264809	-11.7694	1.31169e-10	1.2355e-07	14.0267
ABLIM1	ES	13209	16	15	17	0	0.9354	0.6908	0.1215	-0.231461	0.281132	-8.77311	9.7947e-09	3.49886e-06	9.43765
ABLIM1	ES	13211	12	10	13	0	0.9703	0.2725	0.0456	-0.0314417	0.978358	-4.31673	0.00024326	0.00719271	-0.895405
FGFR2	AT	13296	26	NA	NA	0	1	0.867	0.1488	0.166233	0.237375	5.1701	2.83327e-05	0.00150348	1.25807
FGFR2	AT	13298	27	NA	NA	0	1	0.3508	0.0543	-0.0617833	0.144842	-4.95214	4.89659e-05	0.00224727	0.7077
FGFR2	AT	13300	28.2	NA	NA	0	1	0.7365	0.1248	-0.112258	0.612592	-3.80876	0.000871683	0.0179095	-2.1585
NSMCE4A	AP	13328	1	NA	NA	0	1	0.7681	0.1126	-0.106179	0.771335	-3.30486	0.00301999	0.0436602	-3.37199
NSMCE4A	AP	13329	2	NA	NA	0	1	0.7681	0.1126	0.106175	0.228662	3.30474	0.00302086	0.0436602	-3.37227
TACC2	AA	13342	15.1	13	15.2	0	0.9913	0.5799	0.0858	-0.0795167	0.947742	-3.68057	0.00119938	0.0228329	-2.47193
TACC2	ES	13343	14	13	15.1	0	0.9843	0.6538	0.0914	0.110096	0.0667277	4.76756	8.65669e-05	0.00342664	0.178128
PLEKHA1	ES	13355	15.1	14	16	0	0.986	0.8604	0.1733	-0.32433	0.351028	-11.6382	5.03233e-11	5.6695e-08	14.8612
BUB3	AA	13390	8.1	7	8.2	0	1	0.7331	0.1031	0.149342	0.657583	5.69025	7.77486e-06	0.000580972	2.564
CHST15	AP	13395	1	NA	NA	0	0.9546	0.6803	0.1234	0.136533	0.733818	3.37998	0.0028823	0.0422988	-3.21966
CHST15	AP	13396	2	NA	NA	0	0.9546	0.6803	0.1234	-0.136533	0.266182	-3.37998	0.0028823	0.0422988	-3.21966
CHST15	AT	13397	9	NA	NA	0	1	0.262	0.0345	-0.0211375	0.94471	-3.35296	0.00268645	0.0402035	-3.25856
CHST15	AT	13398	7.2	NA	NA	0	1	0.262	0.0345	0.0211375	0.0552896	3.35296	0.00268645	0.0402035	-3.25856
CTBP2	AP	13411	1	NA	NA	0	0.9983	0.7118	0.1346	0.14985	0.258763	5.05493	3.78187e-05	0.00186496	0.967384
CTBP2	AP	13412	3	NA	NA	0	0.9983	0.691	0.1254	-0.173583	0.300758	-7.78226	5.72492e-08	1.35237e-05	7.56715
UROS	AT	13430	7	NA	NA	0	1	0.3089	0.0343	0.0453708	0.0380771	3.88388	0.000722485	0.01544	-1.97363
PTPRE	AP	13457	6	NA	NA	0	0.9023	1	0.2271	-0.201542	0.501025	-3.27999	0.00320781	0.0454807	-3.43039
RIC8A	AA	13590	2.2	1	2.3	0	0.9948	0.3894	0.0481	-0.0640875	0.0908438	-5.21772	2.51492e-05	0.00138725	1.37816
SIGIRR	AP	13650	2	NA	NA	0	0.9948	0.9514	0.1956	-0.202021	0.536348	-4.17269	0.000349783	0.00939987	-1.25623
SIGIRR	AP	13651	1.1	NA	NA	0	0.9948	0.9514	0.1956	0.202021	0.463652	4.17269	0.000349783	0.00939987	-1.25623
RNH1	AP	13662	2	NA	NA	0	1	0.5054	0.0816	0.0934042	0.247927	4.93844	5.06828e-05	0.0023029	0.673082
RNH1	AP	13664	1	NA	NA	0	1	0.5417	0.0857	-0.101083	0.735625	-4.52025	0.000145515	0.00492197	-0.383256
RNH1	AA	13679	4.2	1	4.3	0	1	0.7376	0.1128	0.113808	0.551492	5.4319	1.47404e-05	0.000917372	1.91714
RASSF7	AP	13686	2	NA	NA	0	0.9825	0.7803	0.0654	0.0464429	0.929233	4.7847	0.000104556	0.0038767	0.0805025
RASSF7	AP	13688	1	NA	NA	0	0.9825	0.6072	0.0502	-0.0275286	0.0238156	-3.41057	0.0026839	0.0402035	-3.14994
RASSF7	RI	13690	6.2:6.3:6.4	6.1	6.5	0	0.993	0.5888	0.0965	0.177082	0.765028	8.56	2.17167e-08	6.31914e-06	8.68423
RASSF7	AA	13691	6.3:6.4	6.1	6.5	0	0.9721	1	0.1413	0.155848	0.505153	3.90743	0.000833558	0.017399	-1.99746
RASSF7	AD	13692	6.2:6.3	6.1	6.5	0	0.9843	0.7189	0.1091	0.142348	0.690464	4.9461	5.57542e-05	0.002467	0.620362
RASSF7	RI	13694	6.2	6.1	6.3	0	0.993	0.4626	0.0835	0.0719708	0.802794	3.46641	0.00203541	0.033209	-2.98879
IRF7	ES	13712	00:04:05.100000	3.2	5.3	0	0.9913	0.1355	0.0229	0.0317818	0.971024	3.74434	0.00114952	0.0221718	-2.35644
IRF7	ES	13715	4	3.2	5.1	0	0.9983	0.5404	0.0861	0.17145	0.802542	7.29026	1.73047e-07	2.891e-05	6.43599
IRF7	RI	13720	2.4	2.3	2.5	0	0.993	0.7739	0.1281	-0.104426	0.390921	-4.03693	0.000527198	0.0124091	-1.62487
PIDD	AP	13764	1	NA	NA	0	0.9389	0.9773	0.2253	0.286178	0.250959	3.50228	0.00261205	0.0395056	-2.99121
PIDD	AP	13765	2.1	NA	NA	0	0.9389	0.9773	0.2253	-0.286183	0.749044	-3.50249	0.00261088	0.0395056	-2.99077
EFCAB4A	ES	13776	8	7	9	0	0.9895	0.5684	0.0973	-0.0961565	0.947502	-4.02607	0.000541521	0.0126628	-1.65144
CHID1	AP	13803	1	NA	NA	0	0.9983	0.6211	0.1033	-0.106467	0.20115	-3.98907	0.000555065	0.012945	-1.71346
CHID1	AP	13804	3.1	NA	NA	0	0.9983	0.7773	0.1312	0.114642	0.628212	3.28123	0.00319816	0.0453586	-3.42748
CHID1	AP	13805	5.1	NA	NA	0	0.9983	0.348	0.0592	0.045925	0.070425	3.37776	0.00252876	0.038727	-3.19985
CHID1	ES	13810	12	11	13	0	1	0.2834	0.0386	-0.0547833	0.930429	-4.61187	0.000115461	0.00413459	-0.15211
SLC22A18	AP	13935	2	NA	NA	0	0.9878	0.9299	0.2085	-0.200039	0.736723	-4.2127	0.000341473	0.00928722	-1.19365
SLC22A18	AP	13936	3	NA	NA	0	0.9878	0.7053	0.1405	0.182052	0.117532	5.52015	1.37286e-05	0.000866678	2.03529
OSBPL5	AP	13950	1.1	NA	NA	0	0.904	1	0.2556	-0.272753	0.679917	-3.84297	0.00113136	0.0219179	-2.20966
PGAP2	ME	14007	7|8	6	10	0	0.7749	1	0.237	-0.207338	0.785813	-4.59887	0.000314716	0.00877411	-0.745599
PGAP2	ES	14010	7	6	10	0	0.925	1	0.1565	-0.23994	0.410305	-4.08681	0.000594015	0.0135206	-1.61513
TRIM34	AP	14067	1	NA	NA	0	0.9913	0.9121	0.1643	0.129996	0.307094	3.27203	0.00327033	0.0459886	-3.44906
TRIM34	AP	14068	2	NA	NA	0	0.9913	0.9121	0.1643	-0.129996	0.692906	-3.27203	0.00327033	0.0459886	-3.44906
FAM160A2	AD	14081	8.2	8.1	9.1	0	0.9756	0.8816	0.1233	0.124438	0.247382	3.35853	0.00302995	0.0436602	-3.26845
SMPD1	AA	14098	6.1	5	6.2	0	1	0.3054	0.044	-0.0382833	0.0907833	-4.19603	0.00032981	0.00907244	-1.19788
ILK	AD	14166	5.4:5.5	5.3	6	0	0.9721	0.5197	0.0673	0.0781136	0.935611	3.6523	0.00143397	0.0259125	-2.57416
ILK	ES	14173	3	1.4	4	0	1	0.1334	0.0213	0.0255792	0.958902	3.41589	0.00230369	0.0361112	-3.10928
ILK	AA	14177	1.3	1.1	1.4	0	0.9983	0.7896	0.0824	0.0945	0.364508	3.83423	0.000817981	0.0171553	-2.09592
ZNF215	AT	14188	8	NA	NA	0	1	0.8274	0.1698	-0.125067	0.68695	-3.41348	0.00231734	0.036248	-3.11502
ZNF215	AT	14189	7.2	NA	NA	0	1	0.8274	0.1698	0.125067	0.31305	3.41348	0.00231734	0.036248	-3.11502
PPFIBP2	AP	14200	8	NA	NA	0	0.9564	0.9272	0.2397	-0.263377	0.401741	-5.32528	2.54445e-05	0.00139923	1.45924
AKIP1	ES	14279	2	1.3	3	0	0.9983	0.5891	0.0827	0.0975522	0.692268	3.2503	0.00358002	0.049018	-3.50349
TMEM9B	ES	14289	3	2	4	0	1	0.2866	0.0377	-0.0257542	0.953915	-4.05456	0.000470872	0.0113864	-1.55079
TMEM41B	AT	14308	3.2	NA	NA	0	1	0.2153	0.0178	0.0151458	0.0151188	3.60678	0.00144006	0.0259267	-2.65103
TMEM41B	AT	14310	7.3	NA	NA	0	1	0.2153	0.0178	-0.0151458	0.984881	-3.60678	0.00144006	0.0259267	-2.65103
AMPD3	AP	14345	3	NA	NA	0	0.9093	0.7618	0.1357	0.110058	0.129069	3.66123	0.00170634	0.0292089	-2.61785
CYP2R1	AP	14478	1	NA	NA	0	1	0.5742	0.093	-0.0913958	0.213515	-3.56115	0.00161194	0.0279832	-2.76126
QSER1	AP	14864	1	NA	NA	0	0.9791	0.57	0.1109	0.109209	0.166676	3.33784	0.0030333	0.0436602	-3.30734
QSER1	AP	14865	2	NA	NA	0	0.9791	0.57	0.1109	-0.109209	0.833324	-3.33784	0.0030333	0.0436602	-3.30734
CAPRIN1	AP	14940	2.1	NA	NA	0	0.9825	0.8757	0.147	0.114839	0.2669	3.3957	0.00252634	0.0387038	-3.16505
CAPRIN1	AP	14941	1	NA	NA	0	0.9825	0.9314	0.1678	-0.151117	0.705857	-3.5507	0.00173631	0.0295582	-2.79905
PDHX	AP	14971	2	NA	NA	0	0.9983	0.6164	0.0687	0.0873174	0.741619	6.40035	1.69754e-06	0.000172654	4.15918
PDHX	AP	14972	1	NA	NA	0	0.9983	0.6164	0.0687	-0.0873174	0.258381	-6.40035	1.69754e-06	0.000172654	4.15918
CD44	ES	15056	7:8:9.1:9.2:10:11:12.1:13	5	14	0	0.9511	1	0.2314	-0.23069	0.77305	-3.47715	0.00243096	0.0375569	-3.01192
CD44	ES	15104	6:7:8:9.1:9.2	5	10	1	0.904	0.8532	0.1842	-0.169316	0.231895	-3.72411	0.00148032	0.0263838	-2.47693
CD44	ES	15105	7:8:9.1:9.2	5	10	1	0.9389	0.9108	0.2025	-0.227768	0.486821	-4.94039	9.61397e-05	0.00367119	0.271759
CD44	ES	15108	00:08:09.200000	5	10	1	0.9267	0.8475	0.193	-0.158642	0.415851	-4.14786	0.000567598	0.0131466	-1.52043
CD44	ES	15112	7:8:9.1:9.2:10:11	5	12.1	0	0.9703	0.9425	0.2152	-0.308248	0.364264	-6.96066	4.70166e-07	6.27907e-05	5.46949
CD44	ES	15115	7:8:9.2:10:11	5	12.1	0	0.9686	0.9336	0.1979	-0.224717	0.299485	-6.63259	9.92314e-07	0.000110942	4.70669
DGKZ	AP	15540	3	NA	NA	0	0.9703	0.9272	0.2009	0.381195	0.425826	8.8139	1.32121e-08	4.30011e-06	9.19553
DGKZ	AP	15541	2	NA	NA	0	0.9703	0.9547	0.1839	-0.353564	0.466261	-8.63842	1.861e-08	5.61917e-06	8.84305
MDK	AP	15566	2.1	NA	NA	0	0.9948	0.4519	0.0805	0.172705	0.814193	11.3145	1.50924e-10	1.30137e-07	13.8036
MDK	AP	15567	1.1	NA	NA	0	0.9948	0.4519	0.0805	-0.1727	0.185804	-11.314	1.51053e-10	1.30137e-07	13.8027
MDK	RI	15571	2.2:2.3	2.1	2.4	0	0.9895	0.1655	0.0201	0.0200682	0.0279935	3.44399	0.00235848	0.0367471	-3.06193
C11orf49	ES	15635	3	1	7	0	0.9948	0.403	0.0546	-0.0595913	0.9065	-4.52108	0.000159196	0.00527111	-0.432387
NR1H3	AP	15692	1	NA	NA	0	0.9651	1	0.211	0.286321	0.39064	5.82072	1.42684e-05	0.000893058	2.2173
NR1H3	AP	15694	2	NA	NA	0	0.9651	0.7482	0.1398	-0.170316	0.194605	-4.05343	0.000702712	0.0151278	-1.73429
NR1H3	RI	15699	8.2	8.1	8.3	0	0.9983	0.4088	0.0581	0.0445542	0.134069	3.62976	0.00136044	0.0249166	-2.59537
SLC39A13	RI	15739	6.1	6.9	6.11	0	0.993	0.3488	0.064	-0.0506652	0.178713	-4.47043	0.000180453	0.00582139	-0.557694
CELF1	AA	15763	18.1:18.2	17	18.3	0	1	0.7014	0.1477	-0.204417	0.804971	-5.51105	1.21099e-05	0.000792973	2.11575
PTPMT1	RI	15770	1.2	1.1	1.3	0	0.9965	0.362	0.0638	0.0694273	0.1602	4.22542	0.000359296	0.00951581	-1.20311
TMX2	ES	15920	3.2:3.3	2	4	0	0.9983	0.8683	0.158	-0.114863	0.461985	-3.5797	0.00153978	0.0271487	-2.7165
TMX2	AA	15923	3.2	2	3.3	0	1	0.3276	0.0483	-0.03175	0.109329	-3.80976	0.000869499	0.0179095	-2.15603
CTNND1	ES	15933	00:21:22.100000	20	22.2	0	0.9948	0.9175	0.1571	0.226561	0.724121	6.53948	1.22966e-06	0.000132749	4.48791
CTNND1	ES	15935	21	20	22.1	0	1	0.899	0.2043	0.225346	0.204315	5.46415	1.36051e-05	0.000861603	1.99811
CTNND1	ES	15979	3:4.1:4.2:4.3:5	2.1	6	0	0.9703	1	0.1715	-0.11583	0.852487	-3.66504	0.0013143	0.0243046	-2.52613
CTNND1	ES	15980	4.1:4.2:4.3:5	2.1	6	0	0.8726	1	0.2155	-0.298025	0.611011	-5.75069	1.35345e-05	0.000860603	2.20957
CTNND1	ES	15982	3:4.2:4.3:5	2.1	6	0	0.7696	1	0.2525	-0.247483	0.558293	-3.98157	0.000907685	0.0184809	-1.93859
CTNND1	ES	15998	2.2:2.3:3:4.1:4.2:4.3	2.1	5	0	0.9756	0.4667	0.0773	-0.0635125	0.0879562	-3.90805	0.000680063	0.0147872	-1.91397
CTNND1	ES	15999	3:4.1:4.2:4.3	2.1	5	0	0.9825	0.8896	0.1709	-0.212604	0.419756	-7.43116	1.25653e-07	2.27199e-05	6.76307
CTNND1	ES	16000	4.1:4.2:4.3	2.1	5	0	0.9721	0.5374	0.0965	-0.134579	0.160715	-5.49597	1.25716e-05	0.000816009	2.07793
CTNND1	ES	16002	3:4.2:4.3	2.1	5	0	0.9721	0.6964	0.0882	-0.112138	0.128927	-4.87231	5.98621e-05	0.0025987	0.505952
CTNND1	AD	16006	2.2:2.3	2.1	5	0	0.9791	0.6653	0.0917	-0.0702917	0.30375	-3.45693	0.00208333	0.03379	-3.01145
CTNND1	AD	16007	2.2	2.1	5	0	0.9686	0.2845	0.0446	-0.0289	0.0555574	-3.32626	0.00298522	0.0433745	-3.32731
FAM111A	AP	16022	4.1	NA	NA	0	0.9843	0.9696	0.1756	0.189327	0.406265	3.84554	0.000900807	0.0184006	-2.11574
FAM111A	AP	16023	1.1	NA	NA	0	0.9843	0.9696	0.1756	-0.189327	0.593735	-3.84554	0.000900807	0.0184006	-2.11574
SLC15A3	ES	16132	5	4	6	0	0.9983	0.5559	0.0684	-0.0547792	0.814019	-3.55216	0.00164811	0.028476	-2.78293
CYB561A3	AA	16164	6.6	6.4	6.7	0	1	0.8914	0.1552	-0.158846	0.757456	-5.30198	2.03743e-05	0.00117946	1.59044
CPSF7	AD	16198	7.2	7.1	8	0	0.9913	0.6456	0.0922	0.0899958	0.431844	4.29714	0.000255585	0.0074916	-0.944568
SDHAF2	ES	16233	00:03:04.100000	1	6	0	1	0.9657	0.1418	0.160483	0.337067	4.64663	0.00010576	0.0038886	-0.0643332
PPP1R32	AP	16238	1	NA	NA	0	0.9005	0.98	0.2575	-0.34945	0.35669	-4.84174	0.000192792	0.00611633	-0.244832
FADS1	AP	16298	9.1	NA	NA	0	1	0.7457	0.1403	-0.151138	0.546519	-4.79349	7.30153e-05	0.00303802	0.306717
INCENP	ES	16337	11	10	12	0	0.8569	1	0.1801	-0.218722	0.52875	-6.08435	0.000218258	0.00666352	0.404831
EEF1G	AP	16350	2	NA	NA	0	0.993	0.8273	0.133	0.137914	0.6422	3.75199	0.00112854	0.0218729	-2.33828
EEF1G	AP	16351	1	NA	NA	0	0.993	0.8273	0.133	-0.137914	0.3578	-3.75199	0.00112854	0.0218729	-2.33828
ROM1	AP	16366	2	NA	NA	0	0.9843	0.9387	0.2024	0.187264	0.691524	3.30422	0.00328388	0.0461275	-3.38455
ROM1	AP	16367	1	NA	NA	0	0.9843	0.9387	0.2024	-0.187264	0.308476	-3.30422	0.00328388	0.0461275	-3.38455
GANAB	ES	16378	6	5.1	7	0	1	0.732	0.0888	0.0591667	0.277008	3.5891	0.00150445	0.0267188	-2.69381
BSCL2	ES	16407	10	9	11	0	1	0.0813	0.0114	-0.00815417	0.992019	-3.64061	0.00132436	0.024429	-2.56905
SLC3A2	AP	16462	1	NA	NA	0	1	0.6913	0.0971	0.157262	0.100469	10.7912	1.31305e-10	1.2355e-07	13.8048
SLC3A2	AP	16464	5.1	NA	NA	0	1	0.7434	0.1117	-0.1776	0.862862	-10.6436	1.72351e-10	1.40237e-07	13.5251
SLC3A2	ES	16473	3	1	5.2	0	0.8063	0.836	0.119	-0.196267	0.893675	-10.7723	0.00307645	0.0441022	-0.661048
MARK2	AP	16536	1	NA	NA	0	0.9948	0.8204	0.1364	-0.1942	0.722292	-5.32772	1.91068e-05	0.00112385	1.65524
MARK2	AP	16537	2	NA	NA	0	0.9948	0.8204	0.1373	0.209792	0.263692	5.67234	8.12596e-06	0.000600065	2.51929
MARK2	ES	16544	16.1:16.2	15.2	17	0	0.9983	0.7911	0.1315	0.109133	0.606933	3.82535	0.000836324	0.0174484	-2.11775
VEGFB	AA	16601	6.1	5	6.2	0	1	0.3532	0.0563	0.0558417	0.791879	3.6557	0.00127573	0.0237814	-2.53241
PLCB3	AT	16608	31.2	NA	NA	0	1	0.2224	0.0409	0.0428625	0.877527	4.05504	0.000470311	0.0113864	-1.54961
PLCB3	AT	16609	32	NA	NA	0	1	0.2224	0.0409	-0.0428625	0.122473	-4.05504	0.000470311	0.0113864	-1.54961
GPR137	ES	16623	9	8	10.1	0	0.9948	0.2181	0.0361	-0.0396318	0.960641	-4.19633	0.000385539	0.00998221	-1.27337
PRDX5	ES	16636	3	2	4	0	1	0.0948	0.011	-0.0108	0.968671	-3.68566	0.00118432	0.0226246	-2.45954
PRDX5	ES	16639	02:03:00	1	4	0	1	0.1101	0.0131	-0.0131458	0.969206	-4.83499	6.57632e-05	0.00278909	0.411621
PRDX5	ES	16640	3	1	4	1	0.993	0.568	0.0914	-0.0970304	0.584791	-5.63482	1.04092e-05	0.000707476	2.31571
DPF2	ES	16815	7	6	8	0	0.9965	0.2073	0.0349	-0.0301708	0.0666646	-3.54554	0.00167528	0.0288095	-2.7989
SCYL1	AA	16860	14.1	13	14.2	0	1	0.3719	0.0532	0.058575	0.728329	4.36156	0.000217233	0.006651	-0.782776
LTBP3	ES	16865	25	24	26	0	0.9808	0.7612	0.1541	-0.210132	0.586309	-5.72654	9.88802e-06	0.000686351	2.4181
RNASEH2C	RI	16916	1.2	1.1	1.3	0	0.9843	0.5345	0.0811	0.114864	0.153959	6.76839	9.23237e-07	0.000103747	4.83636
BANF1	AD	16983	1.2	1.1	3	0	1	0.327	0.03	-0.0314583	0.9099	-3.5484	0.0016635	0.0286743	-2.79201
YIF1A	ES	17008	7	6	8.2	0	1	0.1995	0.0375	-0.0390583	0.966008	-4.88134	5.85173e-05	0.00255837	0.528757
PELI3	AT	17033	7.2	NA	NA	0	1	0.6547	0.0919	0.129312	0.123085	4.16513	0.000356508	0.00947751	-1.27512
PELI3	AT	17034	8	NA	NA	0	1	0.6547	0.0919	-0.129304	0.87691	-4.16495	0.000356675	0.00947751	-1.27558
RBM4	ES	17096	4.1	3.2	5	0	1	0.6209	0.0849	0.0645917	0.695321	3.42706	0.00224155	0.0354642	-3.08268
RBM4B	AT	17107	2.3	NA	NA	0	1	0.5519	0.0731	0.054975	0.141937	5.17686	2.78569e-05	0.00148361	1.27513
RBM4B	AT	17108	5	NA	NA	0	1	0.5519	0.0731	-0.054975	0.858062	-5.17686	2.78569e-05	0.00148361	1.27513
KDM2A	AD	17153	18.2	18.1	19	0	1	0.1155	0.0153	0.011475	0.985425	3.5674	0.00158728	0.027664	-2.74619
PPP1CA	ES	17183	2.1:2.2	1	3	0	0.9878	1	0.1773	-0.136309	0.483213	-3.38896	0.00256768	0.0390782	-3.18085
SUV420H1	AP	17290	2	NA	NA	0	0.9668	0.5132	0.0852	0.0787348	0.160313	3.618	0.00147407	0.026316	-2.63868
SUV420H1	AP	17292	1	NA	NA	0	0.9668	0.5132	0.0852	-0.0787348	0.839687	-3.618	0.00147407	0.026316	-2.63868
CTTN	ES	17404	11	10	13	0	1	0.4395	0.0701	0.051275	0.812058	3.27011	0.00328559	0.0461368	-3.45356
IL18BP	RI	17483	1.5:1.6:1.7	1.4	1.8	0	0.9529	0.9232	0.205	0.275619	0.637747	3.53605	0.00200114	0.0328082	-2.8622
NUMA1	AP	17513	1	NA	NA	0	0.9424	0.8079	0.1479	-0.160518	0.707	-3.61908	0.00155284	0.0272697	-2.65244
NUMA1	AP	17514	2	NA	NA	0	0.9424	0.8079	0.1479	0.160509	0.292996	3.61883	0.00155375	0.0272739	-2.65301
NUMA1	ES	17515	18	17	19	0	1	0.7545	0.1227	-0.115292	0.657504	-4.13887	0.000380886	0.00990259	-1.34071
ARAP1	ES	17642	16	15	17	0	0.9983	0.3548	0.0499	-0.0352833	0.951667	-4.09899	0.000421096	0.0105567	-1.44017
ATG16L2	AT	17649	17	NA	NA	0	1	0.6543	0.087	-0.089525	0.703033	-4.36524	0.000215226	0.00660838	-0.773533
ATG16L2	AT	17650	18	NA	NA	0	1	0.6543	0.087	0.089525	0.296967	4.36524	0.000215226	0.00660838	-0.773533
RAB6A	ES	17708	6	4	7	0	1	0.0422	0.0054	0.00435833	0.997587	3.39972	0.00239665	0.0371705	-3.14773
RAB6A	ES	17709	5	4	7	0	1	0.0209	0.0032	0.00314167	0.9983	3.23612	0.00356719	0.0489033	-3.53304
PAAF1	ES	17744	4.2	3.2	5	0	0.9093	0.7351	0.0958	-0.265514	0.149114	-6.45545	1.72308e-05	0.00102865	2.42663
DNAJB13	AP	17748	5.1	NA	NA	0	0.911	0.8627	0.1795	0.147454	0.315254	3.66206	0.00300728	0.0435941	-2.82222
XRRA1	AA	17786	18.1:18.2	17	18.3	0	0.9878	0.7588	0.164	0.25344	0.709158	5.27669	3.88322e-05	0.00189651	1.13585
RPS3	AT	17836	8	NA	NA	0	1	0.3065	0.0426	-0.0419208	0.0969854	-4.09374	0.000426694	0.0106705	-1.45325
SERPINH1	ES	17871	2.2	1	3	0	0.9895	0.3864	0.0416	-0.0967591	0.0816957	-7.53388	1.765e-07	2.91543e-05	6.53153
UVRAG	AP	17878	10	NA	NA	0	1	0.9064	0.2026	0.364675	0.489446	8.47213	1.28148e-08	4.26559e-06	9.10044
UVRAG	AP	17880	1	NA	NA	0	1	0.8584	0.174	-0.307983	0.411646	-6.63784	7.87381e-07	9.20104e-05	4.89007
LRRC32	AP	17897	1	NA	NA	0	0.9511	1	0.1553	-0.305822	0.790421	-6.3089	2.10094e-06	0.000204229	3.94195
LRRC32	AP	17898	2	NA	NA	0	0.9511	1	0.1553	0.305822	0.209579	6.3089	2.10094e-06	0.000204229	3.94195
PAK1	AP	17950	2	NA	NA	0	0.9965	0.9258	0.1939	-0.194521	0.577798	-4.01969	0.000513987	0.0121688	-1.63746
PAK1	AP	17951	1	NA	NA	0	0.9965	0.9258	0.1939	0.194517	0.422204	4.01959	0.00051412	0.0121688	-1.63771
ANKRD42	AT	18050	6.2	NA	NA	0	1	0.6353	0.1245	0.134475	0.603771	5.21815	2.51219e-05	0.00138725	1.37925
ANKRD42	AT	18051	13.2	NA	NA	0	1	0.6485	0.1088	-0.133538	0.255631	-6.72667	6.38607e-07	8.0862e-05	5.10347
CCDC90B	AD	18085	1.3	1.2	2	0	0.9983	0.9611	0.1058	0.102508	0.427154	3.35967	0.00264283	0.0397946	-3.24267
TMEM126A	ES	18130	2.1:2.2	1	3.2	0	1	0.2585	0.0458	0.0621042	0.907306	4.29394	0.000257656	0.00752985	-0.952593
CREBZF	RI	18136	2.6	2.5	2.7	0	1	0.1619	0.0221	0.0229875	0.974127	3.39833	0.00240484	0.0372843	-3.15104
CREBZF	RI	18140	2.2	2.1	2.3	0	1	0.5945	0.0932	0.0677958	0.795723	3.37409	0.00255149	0.0389262	-3.20853
SYTL2	ES	18148	13	12.2	14	0	0.9825	0.8587	0.1815	0.168243	0.643351	4.22135	0.00033425	0.00914464	-1.17238
SYTL2	AD	18156	8.3	8.2	9	0	0.9913	0.9574	0.1973	0.258125	0.341696	5.67925	7.98859e-06	0.00059593	2.53655
PICALM	ES	18169	20	18	21	0	0.9895	0.4867	0.0776	-0.0780458	0.918094	-4.0802	0.00044148	0.0109468	-1.48699
PICALM	ES	18172	14.1:14.2	13	15	0	1	0.6804	0.1397	0.138083	0.386621	4.17954	0.0003438	0.00931108	-1.23911
CHORDC1	RI	18267	9.3	9.2	9.4	0	0.9424	0.9275	0.1896	0.190775	0.728816	3.7096	0.00142291	0.0257708	-2.48371
CHORDC1	ES	18269	9.2	8.3	9.4	0	0.9808	0.7841	0.0961	-0.0684318	0.0786326	-3.95154	0.000697362	0.0150579	-1.86235
FAT3	AT	18278	28	NA	NA	0	0.9965	0.9253	0.2417	-0.346483	0.616481	-5.57621	1.19893e-05	0.00078742	2.1725
FAT3	AT	18279	3	NA	NA	0	0.9965	0.9253	0.2417	0.346483	0.383519	5.57621	1.19893e-05	0.00078742	2.1725
SLC36A4	AT	18284	8	NA	NA	0	1	0.333	0.0699	-0.0633875	0.116715	-3.6427	0.00131751	0.0243231	-2.56398
SLC36A4	AT	18285	13	NA	NA	0	1	0.333	0.0699	0.0633875	0.883285	3.6427	0.00131751	0.0243231	-2.56398
SMCO4	AP	18299	1	NA	NA	0	0.9913	0.9154	0.2328	0.369091	0.458913	6.40396	2.08476e-06	0.000203556	4.00394
SMCO4	AP	18300	2	NA	NA	0	0.9913	0.9154	0.2328	-0.369091	0.541087	-6.40396	2.08476e-06	0.000203556	4.00394
TAF1D	AA	18320	8.1	7	8.2	0	1	0.7598	0.1175	0.140604	0.295481	4.98212	4.54094e-05	0.00212708	0.783469
C11orf54	ES	18326	2	1	3.1	0	0.9791	0.7191	0.094	0.0787348	0.0949617	3.38794	0.00257399	0.0391335	-3.18323
CEP57	ES	18392	10.3	10.1	11	0	0.9878	0.4666	0.0629	0.0532292	0.945823	3.61671	0.0014051	0.0255324	-2.62698
JRKL	RI	18412	1.2	1.1	1.3	0	0.993	0.8288	0.1534	-0.128904	0.741906	-3.36026	0.00263903	0.039751	-3.24128
C11orf88	RI	18667	6.2	6.1	6.3	0	0.9965	0.9913	0.3922	0.459258	0.417625	5.62323	9.1733e-06	0.000645924	2.39661
PPP2R1B	AT	18672	16	NA	NA	0	1	0.4267	0.0737	0.0743208	0.773502	4.59245	0.000121263	0.00428299	-0.201119
PPP2R1B	AT	18674	18	NA	NA	0	1	0.4267	0.0737	-0.0743208	0.226498	-4.59245	0.000121263	0.00428299	-0.201119
ALG9	AP	18682	1	NA	NA	0	0.9878	1	0.1465	-0.176012	0.431248	-4.97774	4.59132e-05	0.00213927	0.77238
ALG9	AP	18683	6	NA	NA	0	0.9878	1	0.1465	0.176012	0.568752	4.97774	4.59132e-05	0.00213927	0.77238
C11orf1	AP	18686	1	NA	NA	0	1	0.5783	0.0929	-0.127317	0.200154	-4.50907	0.00014968	0.0050257	-0.411432
C11orf1	AP	18688	2	NA	NA	0	1	0.5551	0.0907	0.104421	0.775465	4.03732	0.000491729	0.0117808	-1.59367
C11orf1	ES	18689	5	4	6	0	1	0.2189	0.0369	-0.035025	0.952225	-3.80461	0.000880752	0.018075	-2.16868
CRYAB	AP	18693	5.1	NA	NA	0	0.9983	0.6062	0.0956	-0.123142	0.159537	-4.88855	5.74646e-05	0.00252522	0.546979
DIXDC1	AP	18707	8	NA	NA	0	0.8743	0.9563	0.2232	-0.322125	0.527893	-7.24327	5.86421e-07	7.64575e-05	5.42816
DIXDC1	AP	18708	3	NA	NA	0	0.8743	1	0.2285	0.30484	0.413339	6.43422	3.10131e-06	0.000283296	3.71714
DIXDC1	AT	18709	7.2	NA	NA	0	1	0.5965	0.0959	0.0887	0.0809417	4.3191	0.000241811	0.00715951	-0.889461
DIXDC1	AT	18710	24	NA	NA	0	1	0.5965	0.0959	-0.0887	0.919058	-4.3191	0.000241811	0.00715951	-0.889461
TIMM8B	ES	18730	2	1	3	0	1	0.7121	0.0919	0.143071	0.267977	5.0231	4.09662e-05	0.00198017	0.886985
PTS	ES	18764	4	3	5	0	1	0.568	0.1094	0.261867	0.776479	12.9373	3.29282e-12	8.42337e-09	17.595
RNF214	AD	18906	3.2	3.1	4	0	1	0.3567	0.0548	0.041625	0.941096	3.40827	0.00234708	0.036609	-3.12741
TMEM25	ES	19014	5	4	6	0	0.993	0.5988	0.1132	-0.116409	0.792613	-3.57908	0.0016206	0.028078	-2.73154
IFT46	ES	19025	4	3	5	0	0.9948	0.5954	0.0937	-0.0860583	0.291854	-5.11118	3.28406e-05	0.00167202	1.1094
PHLDB1	ES	19041	16	14	17	0	0.9721	0.1801	0.0262	-0.048175	0.0398364	-5.79339	1.23238e-05	0.000805776	2.30524
C2CD2L	AA	19120	14.1	13	14.2	0	0.9686	0.2136	0.0315	-0.0200952	0.0168467	-3.37553	0.00291237	0.0426403	-3.2298
C11orf63	AT	19191	10	NA	NA	0	1	0.8773	0.1422	-0.129621	0.673848	-4.09891	0.000421182	0.0105567	-1.44037
C11orf63	AT	19192	4	NA	NA	0	1	0.8773	0.1422	0.129621	0.326152	4.09891	0.000421182	0.0105567	-1.44037
TBRG1	ES	19225	4	3	6	0	0.9948	0.6922	0.1217	-0.11193	0.562598	-3.40055	0.00249697	0.0383743	-3.15367
FEZ1	AT	19294	3.2	NA	NA	0	1	0.8353	0.0882	0.134992	0.136796	3.61287	0.00141852	0.0257019	-2.63629
FEZ1	AT	19295	11	NA	NA	0	1	0.8353	0.0882	-0.134992	0.863204	-3.61287	0.00141852	0.0257019	-2.63629
CHEK1	AP	19307	1	NA	NA	0	1	0.8786	0.1845	-0.278317	0.785233	-5.64854	8.61743e-06	0.000623029	2.45986
CHEK1	AP	19309	2.1	NA	NA	0	1	0.8786	0.1845	0.278317	0.214767	5.64854	8.61743e-06	0.000623029	2.45986
CHEK1	AT	19311	13.3	NA	NA	0	1	0.7421	0.1401	0.227667	0.446904	5.46809	1.34727e-05	0.00085806	2.00799
CHEK1	AT	19312	14	NA	NA	0	1	0.7421	0.1401	-0.227667	0.553096	-5.46809	1.34727e-05	0.00085806	2.00799
PUS3	ES	19366	2	1	3	1	0.7888	0.5725	0.0911	0.112485	0.769597	5.49508	0.000114715	0.00412571	0.549342
APLP2	ES	19479	9	8	10	0	1	0.6357	0.1247	-0.167038	0.750448	-7.0901	2.73867e-07	4.06526e-05	5.96712
SNX19	AT	19506	13	NA	NA	0	1	0.0772	0.0115	-0.0103583	0.989046	-3.36396	0.00261537	0.0395056	-3.23254
SNX19	AT	19507	8	NA	NA	0	1	0.0772	0.0115	0.0103583	0.0109542	3.36396	0.00261537	0.0395056	-3.23254
SNX19	AD	19515	1.2:1.3:1.4	1.1	2	0	1	0.3476	0.0586	0.0590542	0.913165	4.96292	4.76563e-05	0.0021986	0.734937
NTM	AP	19519	3.1	NA	NA	0	0.9686	1	0.3404	0.602962	0.420968	7.81915	1.34574e-07	2.36516e-05	6.87471
NTM	AP	19520	1	NA	NA	0	0.9686	1	0.3395	-0.596924	0.56703	-7.8772	1.19848e-07	2.18501e-05	6.99395
CCDC77	AP	19598	1	NA	NA	0	0.8325	0.8131	0.173	-0.207137	0.706612	-3.92594	0.000937693	0.0189689	-2.02252
CCDC77	AP	19599	2	NA	NA	0	0.8325	0.8131	0.173	0.207137	0.293388	3.92594	0.000937693	0.0189689	-2.02252
NINJ2	RI	19608	4.2	4.1	4.3	0	0.993	0.4735	0.0497	0.09275	0.0728375	4.52757	0.00014285	0.00485801	-0.364801
WNK1	ES	19616	14	13.2	15	0	0.9407	1	0.1939	0.222926	0.263888	5.09051	6.90425e-05	0.00291131	0.608164
WNK1	ES	19617	14:15:00	13.2	16	0	0.9878	1	0.1865	0.233538	0.165465	7.5518	9.57349e-08	1.81432e-05	7.04112
WNK1	ES	19618	15	13.2	16	0	0.9738	1	0.1437	0.133091	0.358462	5.76773	7.56382e-06	0.000571126	2.63955
WNK1	ES	19632	11.2	9	12	0	0.9145	0.7504	0.1191	0.108271	0.0836467	3.47969	0.00228362	0.0359405	-2.99178
CACNA2D4	AT	19675	39.2	NA	NA	0	1	0.7886	0.1405	0.149133	0.329663	4.20529	0.000322206	0.00893828	-1.17473
CACNA2D4	AT	19676	40	NA	NA	0	1	0.7886	0.1404	-0.152854	0.667277	-4.34705	0.000225339	0.00677648	-0.819249
LTBR	ES	19852	00:08:09.100000	7	10	0	0.9965	0.8977	0.1846	-0.154713	0.669519	-3.31173	0.00297001	0.0432536	-3.35583
LTBR	ES	19853	9.1	7	10	0	1	0.1862	0.0231	-0.0212042	0.976502	-4.10648	0.000413234	0.0104349	-1.4215
GAPDH	AP	19874	2.1	NA	NA	0	1	0.1666	0.0305	-0.0572042	0.0758937	-7.43202	1.25408e-07	2.27199e-05	6.76507
ZNF384	ES	19923	8	7	9	0	0.9983	0.8184	0.1033	-0.0870783	0.464996	-3.24081	0.00366194	0.0497262	-3.52539
ZNF384	AD	19927	1.2	1.1	2.2	0	0.9476	0.7848	0.1576	-0.202345	0.423541	-5.77435	1.28493e-05	0.000827818	2.2626
LRRC23	ES	20004	7.1:8:9	6	10	0	1	0.3061	0.0433	-0.0382833	0.974425	-3.35472	0.00267496	0.0400922	-3.2544
LRRC23	ES	20006	7.1	6	10	0	0.8988	0.5617	0.0862	-0.0942944	0.932815	-4.10118	0.000697408	0.0150579	-1.67422
LRRC23	AD	20009	3.2:3.3	3.1	4	0	0.9005	0.7918	0.1547	-0.176822	0.198081	-3.71786	0.00162414	0.0281222	-2.51969
PTPN6	AP	20022	1	NA	NA	0	0.9965	0.9569	0.1991	0.272525	0.299117	5.77067	6.3785e-06	0.000497795	2.76447
PTPN6	AP	20023	2	NA	NA	0	0.9965	0.9569	0.1991	-0.272525	0.700883	-5.77067	6.3785e-06	0.000497795	2.76447
C1S	AA	20070	6.1	5	6.2	0	1	0.4574	0.0459	-0.040425	0.814129	-5.99984	3.64095e-06	0.000319952	3.33296
C1RL	AA	20074	5.1	4.2	5.2	0	0.9965	0.6617	0.0817	0.0661958	0.120177	3.30485	0.00302004	0.0436602	-3.372
PEX5	AA	20088	11.1	10	11.2	0	0.9965	0.2414	0.0405	-0.0512583	0.938158	-3.88292	0.000724222	0.015462	-1.976
PEX5	ES	20089	9	8	10	0	0.9965	0.6934	0.1141	-0.07565	0.642312	-3.46793	0.0020278	0.033171	-2.98514
PHC1	AD	20213	9.2	9.1	10	0	1	0.315	0.0418	-0.0315167	0.973912	-3.34497	0.00273929	0.0408688	-3.27745
CLEC2D	ES	20253	7.1:7.3:7.4:7.5	6.1	8	0	0.9023	0.6395	0.1176	-0.0776769	0.953103	-3.64134	0.00312676	0.0445616	-2.86177
CLEC12A	ES	20289	3	2.2	4	0	0.7522	0.2824	0.0349	0.0161941	0.991878	3.43982	0.00321343	0.0455017	-3.14542
APOLD1	AT	20516	4	NA	NA	0	1	0.7742	0.1302	-0.175854	0.283769	-5.3309	1.89562e-05	0.00111799	1.66322
APOLD1	AT	20517	17	NA	NA	0	1	0.7742	0.1302	0.175854	0.716231	5.3309	1.89562e-05	0.00111799	1.66322
ARHGDIB	AP	20564	1	NA	NA	0	1	0.5295	0.0438	-0.0278375	0.983956	-3.25875	0.0033772	0.0470176	-3.48015
ARHGDIB	AP	20565	3	NA	NA	0	1	0.5295	0.0438	0.0278417	0.0160417	3.25813	0.00338229	0.0470736	-3.48161
DERA	ES	20598	4.1:4.2	3	5	0	1	0.3207	0.0414	-0.0397625	0.971985	-4.11738	0.000402057	0.0103033	-1.39433
LMO3	AP	20608	2	NA	NA	0	0.9564	0.4987	0.0468	0.037687	0.0415872	3.7331	0.00111282	0.0216445	-2.36259
SLCO1A2	AP	20676	3.1	NA	NA	0	0.9895	0.3581	0.0445	-0.0778042	0.0389021	-4.36221	0.000216878	0.00664517	-0.781147
SLCO1A2	AP	20677	1	NA	NA	0	0.9895	0.3581	0.0445	0.0778042	0.961098	4.36221	0.000216878	0.00664517	-0.781147
ABCC9	AT	20715	43	NA	NA	0	1	0.2335	0.0278	0.0292167	0.962712	4.54023	0.000138354	0.00474181	-0.332865
ABCC9	AT	20716	7.2	NA	NA	0	1	0.2335	0.0269	-0.0262958	0.0332396	-4.24666	0.000290294	0.00826633	-1.07115
C2CD5	ES	20733	26:27.1:27.2	25	28	0	0.9965	0.8616	0.1373	-0.116021	0.419369	-3.82927	0.00082816	0.0172945	-2.10809
LYRM5	AT	20809	4	NA	NA	0	1	0.5107	0.0758	0.0829458	0.251423	4.17871	0.00034452	0.0093154	-1.24119
LYRM5	AT	20810	3.4	NA	NA	0	1	0.5107	0.0758	-0.0829458	0.748577	-4.17871	0.00034452	0.0093154	-1.24119
LYRM5	AD	20817	1.2	1.1	3.1	0	0.9808	0.4373	0.0632	0.0584545	0.0993609	4.4669	0.00020012	0.00630314	-0.618382
RASSF8	AT	20838	9	NA	NA	0	1	0.7075	0.0974	0.0665542	0.0821438	4.14833	0.00037192	0.00975606	-1.31709
RASSF8	AT	20839	8	NA	NA	0	1	0.7075	0.0974	-0.0665542	0.917856	-4.14833	0.00037192	0.00975606	-1.31709
FGFR1OP2	ES	20856	5.1	4	6	0	0.9913	0.8684	0.163	-0.2414	0.504088	-7.59892	8.61313e-08	1.67453e-05	7.14924
PPFIBP1	ES	20890	20	19	21	0	0.904	0.8582	0.1732	0.2335	0.483791	7.27915	3.03465e-07	4.40055e-05	5.97573
PPFIBP1	ES	20893	11	10	12	0	0.8028	0.6541	0.1313	-0.154537	0.300179	-4.13393	0.000585757	0.0133838	-1.55199
KLHL42	ES	20900	3	2	4	0	0.9843	0.9513	0.1687	0.144264	0.324385	3.60172	0.00161875	0.0280571	-2.69327
FAM60A	AP	20982	1	NA	NA	0	0.9965	0.7539	0.1576	0.31615	0.482433	10.3062	3.23941e-10	2.21661e-07	12.8765
FAM60A	AP	20983	2	NA	NA	0	0.9965	0.7539	0.1576	-0.31615	0.517567	-10.3062	3.23941e-10	2.21661e-07	12.8765
BICD1	AT	21019	10	NA	NA	0	1	0.9801	0.2088	-0.235237	0.675823	-5.67243	8.12405e-06	0.000600065	2.51953
BICD1	AT	21020	1.5	NA	NA	0	1	0.9801	0.2088	0.235237	0.324177	5.67243	8.12405e-06	0.000600065	2.51953
FGD4	AP	21029	4	NA	NA	0	0.8307	0.8444	0.2031	-0.181377	0.286607	-4.50715	0.000181537	0.00584779	-0.520768
SLC2A13	AT	21085	10	NA	NA	0	1	0.7199	0.0962	-0.0687833	0.920867	-5.2852	2.12462e-05	0.00122188	1.54818
SLC2A13	AT	21086	4.2	NA	NA	0	1	0.7199	0.0962	0.0687833	0.0791333	5.2852	2.12462e-05	0.00122188	1.54818
PPHLN1	AT	21214	19	NA	NA	0	1	0.3368	0.0681	-0.0862042	0.153573	-4.90738	5.48035e-05	0.00243228	0.594579
RAPGEF3	AT	21351	18.2	NA	NA	0	1	0.754	0.0989	0.0907458	0.593256	3.34453	0.00274217	0.0408842	-3.27847
RAPGEF3	AT	21352	30	NA	NA	0	1	0.754	0.0989	-0.0907458	0.406744	-3.34453	0.00274217	0.0408842	-3.27847
SLC48A1	RI	21362	7.2	7.1	7.3	0	1	0.1063	0.0146	0.0186833	0.982525	5.64637	8.66382e-06	0.000623029	2.45443
TMEM106C	AD	21391	5.2	5.1	6	0	1	0.6602	0.0945	0.156188	0.547519	8.45271	1.33548e-08	4.31457e-06	9.05813
TMEM106C	AD	21404	1.2	1.1	2.1	0	0.9913	0.4445	0.0599	0.0448773	0.145896	3.5634	0.00177418	0.0298726	-2.78324
PFKM	AD	21421	16.2:16.3	16.1	17	0	0.9791	1	0.2478	0.300296	0.412104	4.19376	0.000357848	0.0094889	-1.24023
ASB8	AA	21443	2.1	1	2.2	0	0.9878	0.4393	0.0679	-0.0707522	0.811253	-3.6757	0.00128052	0.0238304	-2.50056
KANSL2	ES	21458	3	2	4	0	1	0.3935	0.0593	0.0774167	0.881	4.04706	0.000479835	0.0115586	-1.56945
CACNB3	AP	21468	1	NA	NA	0	0.9791	0.6906	0.1142	-0.196786	0.192551	-6.35451	2.9087e-06	0.00026793	3.72127
CACNB3	AP	21470	3	NA	NA	0	0.9791	0.8125	0.1413	0.134257	0.343849	3.38788	0.00282974	0.0418339	-3.20167
DDX23	RI	21483	9.2	9.1	9.3	0	0.9983	0.1309	0.016	-0.0162458	0.0154771	-3.89231	0.000707401	0.0151729	-1.95283
DDX23	ES	21484	07:08:00	6	9.1	0	1	0.0268	0.0033	0.0057125	0.996906	3.57974	0.00153964	0.0271487	-2.71641
FKBP11	AT	21495	8	NA	NA	0	1	0.6037	0.0937	0.0956375	0.699148	3.60657	0.00144083	0.0259267	-2.65155
FKBP11	AT	21496	7.2	NA	NA	0	1	0.5568	0.0897	-0.0999542	0.294248	-4.17208	0.000350325	0.00940419	-1.25776
PRKAG1	ES	21508	00:03:04.100000	2	4.2	0	0.8586	0.6896	0.1563	0.168967	0.828771	4.06298	0.00107136	0.0210149	-1.92275
PRKAG1	ES	21509	3	2	4.2	0	1	0.2	0.0159	0.0139583	0.985825	3.45035	0.00211721	0.0342007	-3.02715
PRKAG1	AD	21510	1.2	1.1	2	0	0.9983	0.7544	0.119	0.066087	0.0441936	5.0223	4.62316e-05	0.00214938	0.808928
TROAP	AT	21551	10.2	NA	NA	0	0.9983	0.9001	0.1847	-0.270421	0.449356	-4.72688	8.63725e-05	0.00342512	0.138371
TROAP	AT	21552	2.8	NA	NA	0	0.9983	0.9189	0.1706	0.174629	0.32589	4.8697	6.02583e-05	0.0025987	0.499332
CERS5	AA	21680	6.1	1	6.2	0	1	0.1996	0.0338	-0.0309083	0.967975	-4.24826	0.000289119	0.00824891	-1.06712
CERS5	ES	21682	6.2	1	8	0	0.9721	0.4325	0.048	0.0459091	0.0347174	4.64143	0.000131185	0.00453145	-0.194937
LIMA1	AP	21688	4.1	NA	NA	0	1	0.9376	0.1735	0.115842	0.316096	3.65769	0.00126944	0.0237448	-2.52757
METTL7A	RI	21718	3.3	3.2	3.4	0	1	0.0435	0.005	0.00315417	0.997935	3.24966	0.00345231	0.0477005	-3.50141
SLC11A2	AT	21729	23.3	NA	NA	0	1	0.6913	0.1042	-0.0684125	0.274677	-4.39285	0.000200736	0.00631347	-0.704113
SLC11A2	AT	21730	22.2	NA	NA	0	1	0.6913	0.1042	0.0684125	0.725323	4.39285	0.000200736	0.00631347	-0.704113
LETMD1	ES	21780	00:02:03.200000	1.2	7	0	0.9005	0.8597	0.172	0.22312	0.751894	3.54095	0.00307043	0.0440446	-2.98463
DAZAP2	AT	21810	7	NA	NA	0	1	0.1188	0.0133	0.0108208	0.0113229	4.1015	0.000418451	0.0105243	-1.43393
DAZAP2	AT	21811	5	NA	NA	0	1	0.1195	0.0156	-0.0130125	0.97291	-3.98119	0.000566146	0.0131199	-1.73299
GALNT6	AP	21846	3	NA	NA	0	0.8743	0.3056	0.0402	0.0517667	0.952283	5.78146	1.92419e-05	0.00112727	1.97716
GALNT6	AP	21847	1	NA	NA	0	0.8743	0.3056	0.0402	-0.0517667	0.0477171	-5.78146	1.92419e-05	0.00112727	1.97716
ACVRL1	AP	21870	1	NA	NA	0	0.9127	0.986	0.1722	0.154182	0.455839	3.65066	0.00143963	0.0259267	-2.57803
ACVRL1	AP	21871	2.1	NA	NA	0	0.9127	0.986	0.1722	-0.154182	0.544161	-3.65066	0.00143963	0.0259267	-2.57803
TENC1	AP	21925	3	NA	NA	0	0.9913	0.938	0.1678	-0.160971	0.59649	-4.5787	0.000125546	0.00439192	-0.235817
RARG	AP	21979	1	NA	NA	0	0.9773	0.8165	0.1446	-0.158714	0.763398	-4.7329	0.000105179	0.00388316	0.027051
RARG	AP	21980	4	NA	NA	0	0.9773	0.8165	0.1446	0.158714	0.236602	4.7329	0.000105179	0.00388316	0.027051
PRR13	AA	22033	4.1	3	4.2	0	1	0.281	0.0405	-0.0324917	0.970717	-4.14612	0.000373996	0.0098033	-1.32261
PRR13	AA	22038	4.1:4.2	3	4.3	0	1	0.3302	0.0356	-0.0353125	0.963885	-5.38299	1.66485e-05	0.00100481	1.79423
PCBP2	ES	22052	15	14.1	16.1	0	1	0.4576	0.0823	0.0414875	0.737273	3.43563	0.00219502	0.0349691	-3.06228
PCBP2	ES	22055	12:13:00	11.2	14.1	0	1	0.0899	0.0121	-0.011575	0.957313	-4.22204	0.00030888	0.00867816	-1.13279
PCBP2	ES	22058	12	11.2	13	0	1	0.3066	0.0342	-0.0452583	0.765667	-4.50972	0.000149437	0.0050257	-0.409806
PCBP2	AA	22059	11.1	10	11.2	0	1	0.3885	0.0442	-0.0407125	0.445373	-4.37154	0.000211832	0.0065706	-0.757707
MAP3K12	AP	22061	1	NA	NA	0	0.9686	1	0.1833	-0.205923	0.350098	-4.06286	0.000532714	0.0125076	-1.59509
MAP3K12	AP	22063	3.1	NA	NA	0	0.9686	1	0.2091	0.253264	0.522522	4.75655	9.93469e-05	0.00374366	0.0844157
TARBP2	ES	22072	8	7.2	9.1	0	0.9983	0.5217	0.0708	-0.110363	0.886127	-4.34575	0.000226081	0.0067852	-0.82252
ATF7	AT	22093	14	NA	NA	0	1	0.2776	0.0423	-0.038175	0.0527208	-4.79917	7.19773e-05	0.00300467	0.321072
BLOC1S1	AP	22229	1	NA	NA	0	1	0.2804	0.0374	-0.0458792	0.968185	-4.21498	0.000314427	0.00877411	-1.15046
BLOC1S1	AP	22230	2	NA	NA	0	1	0.2804	0.0374	0.0458792	0.0318146	4.21498	0.000314427	0.00877411	-1.15046
MMP19	ES	22271	6.6	6.4	6.8	0	0.9791	0.3345	0.0433	0.0609652	0.953677	3.4482	0.00222579	0.0353824	-3.04164
SUOX	AP	22333	5.1	NA	NA	0	0.9983	1	0.1864	0.192042	0.236412	3.96054	0.000596244	0.0135389	-1.78416
SUOX	AP	22334	1	NA	NA	0	0.9983	1	0.1864	-0.192042	0.763587	-3.96054	0.000596244	0.0135389	-1.78416
SUOX	ES	22340	3	2	5.2	0	1	0.6346	0.1149	0.152312	0.687381	4.20074	0.000325917	0.0090053	-1.1861
MYL6	AA	22381	3.1	2.1	3.2	0	0.9895	0.2474	0.0423	-0.0303435	0.973372	-3.64671	0.00137443	0.0250996	-2.57003
SMARCC2	AD	22391	28.2:28.3	28.1	29	0	1	0.6316	0.1187	0.271883	0.777233	10.774	1.35525e-10	1.24056e-07	13.7722
SMARCC2	ES	22392	28.3	28.1	29	0	0.8866	1	0.227	0.187273	0.214241	3.94871	0.00134738	0.0247083	-2.15508
SMARCC2	ES	22393	18	17	19	0	1	0.542	0.1001	-0.20525	0.338687	-9.88624	7.24381e-10	4.54683e-07	12.0495
NABP2	RI	22408	1.3	1.2	1.4	0	0.9983	0.5447	0.1015	0.128246	0.807915	4.06118	0.000463104	0.0112918	-1.53433
NABP2	AD	22410	1.2	1.1	1.4	0	0.9668	0.4112	0.0683	-0.0697714	0.119369	-3.41402	0.00266238	0.0399931	-3.14206
NACA	AD	22502	1.2	1.1	2.2	0	1	0.2078	0.0243	0.029975	0.048925	3.58853	0.00150654	0.0267345	-2.69517
ARHGAP9	AP	22583	7	NA	NA	0	0.9494	1	0.1425	-0.145162	0.328931	-3.32846	0.00324933	0.0458328	-3.33666
ARHGAP9	AP	22584	1	NA	NA	0	0.9494	0.8464	0.1207	0.141695	0.116236	4.34949	0.000292304	0.00830606	-0.952666
DCTN2	ES	22641	7	2	8	1	0.9721	0.7597	0.0846	0.0777	0.0451311	5.2344	3.65651e-05	0.00182154	1.14278
DTX3	AD	22661	1.2:1.3	1.1	1.5	0	0.9948	0.9417	0.1948	0.190492	0.547162	3.46643	0.00203528	0.033209	-2.98873
ARHGEF25	AP	22664	1	NA	NA	0	0.9354	0.732	0.1718	-0.259929	0.316589	-6.29732	3.2984e-06	0.00029337	3.59271
ARHGEF25	AP	22665	3	NA	NA	0	0.9354	0.732	0.1718	0.259933	0.683413	6.29755	3.29671e-06	0.00029337	3.59323
USP15	ES	22830	8	6	9	0	0.9895	0.6047	0.0952	-0.100096	0.827523	-3.85396	0.00077862	0.0164239	-2.04736
C12orf66	AT	22857	4	NA	NA	0	1	0.5815	0.1035	-0.157058	0.517625	-8.32591	1.75066e-08	5.45535e-06	8.78064
C12orf66	AT	22858	3.2	NA	NA	0	1	0.5815	0.1035	0.157058	0.482375	8.32591	1.75066e-08	5.45535e-06	8.78064
HMGA2	AT	22881	9.3	NA	NA	0	0.9913	0.9994	0.2692	-0.367313	0.41606	-4.09476	0.000457054	0.0111678	-1.48329
TMBIM4	AD	22897	2.3	2.2	4.1	0	0.801	0.902	0.2422	0.19036	0.672316	4.74805	0.000871876	0.0179095	-1.22955
RAB3IP	AP	23342	2	NA	NA	0	1	0.3463	0.0792	-0.160479	0.164048	-8.5116	1.17857e-08	4.02435e-06	9.18627
RAB3IP	AP	23343	5.1	NA	NA	0	1	0.9765	0.1793	0.279504	0.549056	5.40838	1.56289e-05	0.000960628	1.85804
PTPRB	ES	23389	9	8	10	0	0.9459	0.3849	0.0382	0.00914783	0.994564	3.54708	0.00175165	0.0297112	-2.80766
GLIPR1L2	AT	23458	6.2	NA	NA	0	1	0.3213	0.0631	0.09455	0.883475	7.38788	1.38596e-07	2.37876e-05	6.66286
GLIPR1L2	AT	23461	8	NA	NA	0	1	0.3213	0.0631	-0.09455	0.116525	-7.38788	1.38596e-07	2.37876e-05	6.66286
NAP1L1	AP	23467	1	NA	NA	0	1	0.6648	0.0797	-0.116271	0.787265	-4.19515	0.000330546	0.00907721	-1.2001
NAP1L1	AP	23468	7.1	NA	NA	0	1	0.6648	0.0797	0.116271	0.212735	4.19515	0.000330546	0.00907721	-1.2001
OSBPL8	ES	23501	6	5	7.1	0	0.7958	1	0.1839	0.193694	0.303937	4.52714	0.000314341	0.00877411	-0.810533
TSPAN19	ES	23575	5	4	6	0	0.8447	1	0.2482	0.211587	0.729663	4.32052	0.000641434	0.0142196	-1.4009
DUSP6	ES	23618	2.2	1	3	0	1	0.1769	0.0231	0.0461125	0.96106	6.62978	8.0254e-07	9.33143e-05	4.87065
GALNT4	AP	23640	3.1	NA	NA	0	0.9948	0.6972	0.0734	0.0421917	0.900487	4.31385	0.000245032	0.00723536	-0.902624
GALNT4	AP	23641	1	NA	NA	0	0.9948	0.6972	0.0734	-0.0421917	0.0995125	-4.31385	0.000245032	0.00723536	-0.902624
SOCS2	AP	23705	1	NA	NA	0	0.9599	1	0.1951	-0.142917	0.587825	-3.2856	0.00316445	0.0449675	-3.41722
SNRPF	AT	23809	7	NA	NA	0	1	0.1291	0.0085	-0.0155083	0.0085625	-5.10046	3.37358e-05	0.00170967	1.08233
SNRPF	AT	23810	4	NA	NA	0	1	0.1534	0.0197	0.029125	0.970063	3.45146	0.00211146	0.0342007	-3.0245
TMPO	AT	23844	10	NA	NA	0	1	0.401	0.062	-0.0994833	0.775887	-7.11511	2.5853e-07	3.90354e-05	6.02596
TMPO	AT	23845	4	NA	NA	0	1	0.4081	0.0601	0.0871208	0.208402	7.8269	5.1865e-08	1.25211e-05	7.66824
DRAM1	ES	24013	5	3	6	1	0.8028	0.5634	0.1202	-0.139447	0.290505	-4.32262	0.000382573	0.00993469	-1.12427
PARPBP	AT	24028	4.3	NA	NA	0	1	0.3878	0.0622	0.0695917	0.0744625	4.21463	0.000314704	0.00877411	-1.15134
PARPBP	AT	24029	14	NA	NA	0	1	0.402	0.0749	-0.100288	0.904035	-5.41393	1.54143e-05	0.000953909	1.872
IGF1	AT	24050	5.2	NA	NA	0	1	0.8967	0.1475	-0.146029	0.419273	-3.57718	0.00154942	0.0272421	-2.7226
IGF1	AT	24051	6	NA	NA	0	1	0.8967	0.1475	0.146029	0.580727	3.57718	0.00154942	0.0272421	-2.7226
NFYB	AP	24093	2	NA	NA	0	1	0.6721	0.1125	-0.132104	0.378244	-5.00657	4.27035e-05	0.00204168	0.845225
NFYB	AP	24094	1	NA	NA	0	1	0.6721	0.1125	0.132104	0.621756	5.00657	4.27035e-05	0.00204168	0.845225
TXNRD1	ES	24103	10	6.2	11	0	0.9965	0.0641	0.0051	-0.00559583	0.996519	-3.77048	0.000959008	0.0192846	-2.25238
ISCU	ES	24244	2	1	3	0	1	0.4804	0.079	0.0616875	0.0989104	3.65293	0.00128453	0.0238847	-2.53914
SSH1	ES	24258	12	11	13	0	0.8883	0.8036	0.1143	0.100847	0.803337	3.75467	0.0013815	0.0252182	-2.40832
UNG	AP	24277	1	NA	NA	0	0.9878	0.8493	0.1922	0.324164	0.232702	10.258	9.13084e-10	5.43106e-07	11.9478
UNG	AP	24278	2.1	NA	NA	0	0.9878	0.8493	0.1922	-0.324164	0.767298	-10.258	9.13084e-10	5.43106e-07	11.9478
GIT2	ES	24370	19	18.2	20	0	0.993	0.7463	0.1215	-0.101513	0.861785	-3.23392	0.00358617	0.0490532	-3.53816
ATP2A2	RI	24418	21.2:21.3	21.1	21.4	0	1	0.1583	0.0235	0.0633375	0.958015	9.36538	2.02572e-09	9.7809e-07	10.9932
VPS29	ES	24446	3.1	1	5	0	0.9965	0.7862	0.1463	0.180791	0.311355	5.63601	1.03792e-05	0.000707043	2.31863
RPL6	AD	24584	1.2	1.1	2	0	1	0.6051	0.0867	0.100858	0.122229	8.26423	1.99859e-08	5.89355e-06	8.64491
TBX5	AP	24649	1	NA	NA	0	0.9232	0.8562	0.1045	-0.0899174	0.241813	-3.24948	0.00358705	0.0490532	-3.50539
TBX5	AP	24650	2	NA	NA	0	0.9232	0.8562	0.1045	0.0899174	0.758187	3.24948	0.00358705	0.0490532	-3.50539
RPLP0	ES	24730	5.2:5.3	4.2	6.2	0	1	0.1392	0.0168	-0.00885417	0.981506	-3.37905	0.00252082	0.0386597	-3.19679
RPLP0	AD	24737	1.5	1.4	2	0	1	0.0629	0.0066	-0.00535833	0.0233875	-3.47829	0.00197684	0.0325313	-2.96035
PXN	AP	24744	3	NA	NA	0	0.9983	0.9796	0.1099	0.0770417	0.264583	3.40301	0.00237746	0.0369954	-3.13991
PLA2G1B	ES	24755	3	2.2	4	0	0.7801	0.3086	0.0438	0.027	0.971668	3.641	0.00278563	0.0413931	-2.81961
RNF10	AA	24771	10.1	9	10.2	0	1	0.6754	0.0408	-0.02495	0.147937	-3.23102	0.00361134	0.049278	-3.54492
ANAPC5	AA	24862	9.1	8.3	9.2	0	1	0.4984	0.0745	0.134908	0.709196	6.55851	9.5009e-07	0.000106492	4.69875
RNF34	AT	24866	7.2	NA	NA	0	1	0.3246	0.0553	0.0640167	0.683754	6.15556	2.49503e-06	0.000235776	3.7167
RNF34	AT	24867	8	NA	NA	0	1	0.3246	0.0553	-0.0640167	0.316246	-6.15556	2.49503e-06	0.000235776	3.7167
KDM2B	RI	24879	26.2:26.3	26.1	26.4	0	0.9948	0.7514	0.0946	-0.0632083	0.896779	-3.5649	0.00159709	0.0277583	-2.75222
TMEM120B	RI	24893	12.2	12.1	12.3	0	1	0.3734	0.0445	0.0304333	0.981992	3.50349	0.00185808	0.0310183	-2.89995
MLXIP	AT	24925	9.5	NA	NA	0	1	0.365	0.051	0.0512292	0.0627396	3.39686	0.00241349	0.0373667	-3.15453
MLXIP	AT	24926	17	NA	NA	0	1	0.365	0.051	-0.0512292	0.93726	-3.39686	0.00241349	0.0373667	-3.15453
CLIP1	ES	24955	09:10:00	8	11.1	0	0.9599	0.5388	0.0585	-0.054087	0.0831191	-3.32005	0.00303	0.0436602	-3.34177
RSRC2	AA	24966	9.1	8	9.2	0	1	0.4237	0.0657	-0.0960333	0.535637	-5.51138	1.21001e-05	0.000792973	2.11657
HCAR1	AT	24981	2	NA	NA	0	0.9668	0.9264	0.1871	0.18955	0.65429	3.37081	0.0034871	0.048	-3.2764
HCAR1	AT	24982	6	NA	NA	0	0.9668	0.9264	0.1871	-0.18955	0.34571	-3.37081	0.0034871	0.048	-3.2764
ABCB9	AP	24995	2	NA	NA	0	1	0.4958	0.0766	0.134008	0.183037	9.43898	1.74812e-09	8.82862e-07	11.1446
OGFOD2	AP	25005	1	NA	NA	0	0.9895	0.9575	0.1168	0.193009	0.260264	6.02033	4.1432e-06	0.000350085	3.2509
OGFOD2	AP	25006	2	NA	NA	0	0.9895	0.9575	0.1168	-0.193009	0.739736	-6.02033	4.1432e-06	0.000350085	3.2509
ARL6IP4	AD	25037	1.2:1.3	1.1	2.1	0	0.8499	1	0.2904	-0.5013	0.673082	-6.82841	6.54822e-06	0.000508332	3.33657
ARL6IP4	AD	25038	1.2	1.1	2.1	0	0.9703	0.8907	0.1794	-0.193743	0.892604	-5.22568	3.73121e-05	0.00184204	1.12228
PITPNM2	ES	25044	21	20	22	0	0.836	0.9086	0.2035	-0.188862	0.745244	-3.95457	0.000745503	0.0158547	-1.88662
CDK2AP1	AP	25065	1	NA	NA	0	1	0.4842	0.0466	0.0416708	0.0581604	3.3302	0.00283953	0.0418668	-3.31229
SETD8	ES	25072	2	1	3	0	0.9791	0.5056	0.0924	-0.0970619	0.9242	-4.28709	0.000338896	0.00923722	-1.10069
NCOR2	AD	25143	46.2	46.1	47	0	1	0.5762	0.1221	0.219125	0.70885	7.98199	3.68752e-08	9.74038e-06	8.01746
NCOR2	ES	25144	46.1:46.2	45	47	1	0.9773	0.4825	0.1	0.144182	0.735585	6.91494	6.68575e-07	8.29827e-05	5.1666
SCARB1	AD	25158	13.2	13.1	14	0	0.993	0.1246	0.0247	-0.0233522	0.981362	-3.25114	0.00357286	0.0489658	-3.50155
EP400NL	AT	25241	6.2	NA	NA	0	1	0.8298	0.1593	0.145183	0.284863	4.2045	0.000322843	0.00893828	-1.17669
EP400NL	AT	25242	13	NA	NA	0	1	0.8654	0.161	-0.16545	0.633633	-5.56897	1.04908e-05	0.000710238	2.26086
ANKLE2	AT	25297	10	NA	NA	0	1	0.2069	0.0316	0.0204167	0.0342583	3.89589	0.000701093	0.0151003	-1.944
ANKLE2	AT	25298	13	NA	NA	0	1	0.2069	0.0316	-0.0204167	0.965742	-3.89589	0.000701093	0.0151003	-1.944
PSPC1	AT	25402	9	NA	NA	0	1	0.7321	0.1137	0.0720792	0.477331	3.78299	0.000929546	0.0188561	-2.22171
PSPC1	AT	25404	12	NA	NA	0	1	0.4461	0.075	-0.0707583	0.266233	-4.69912	9.26381e-05	0.00358936	0.0682423
NUPL1	AT	25496	19	NA	NA	0	1	0.3331	0.053	-0.0896375	0.851248	-5.7169	7.28066e-06	0.000553456	2.63049
NUPL1	AT	25497	16.2	NA	NA	0	1	0.3331	0.053	0.0896375	0.148752	5.7169	7.28066e-06	0.000553456	2.63049
RPL21	AD	25529	1.2	1.1	2	0	1	0.0406	0.0044	0.00330417	0.00439792	4.12876	0.000390705	0.0100981	-1.36595
FLT1	AT	25556	16	NA	NA	0	1	0.7715	0.1303	0.112654	0.252235	3.6588	0.00126594	0.0236895	-2.52486
FLT1	AT	25558	35	NA	NA	0	1	0.7715	0.1309	-0.118458	0.743996	-3.56995	0.0015773	0.0275335	-2.74003
HMGB1	AP	25565	3	NA	NA	0	1	0.015	0.0028	-0.00460417	0.00432708	-4.9885	4.46879e-05	0.0021045	0.799567
RFC3	AT	25610	9	NA	NA	0	1	0.31	0.0386	0.0350667	0.943754	4.42527	0.00018496	0.00592139	-0.622548
RFC3	AT	25611	10	NA	NA	0	1	0.31	0.0386	-0.0350667	0.0562458	-4.42527	0.00018496	0.00592139	-0.622548
SPG20	AP	25638	4	NA	NA	0	0.9616	0.9578	0.1653	-0.16915	0.6355	-5.30575	2.66528e-05	0.0014369	1.41227
SPG20	AP	25639	2	NA	NA	0	0.9616	0.9662	0.1717	0.176673	0.311115	5.53031	1.56683e-05	0.000960628	1.95068
SUPT20H	ES	25661	26	25	27	0	1	0.765	0.1213	0.166713	0.437156	5.2721	2.19525e-05	0.00125266	1.5152
POSTN	ES	25671	21	20	22	0	1	0.7342	0.1081	-0.2245	0.445037	-8.19041	2.3434e-08	6.77398e-06	8.48182
POSTN	ES	25672	17:18:19	16	20	0	0.9284	1	0.2284	-0.342435	0.631193	-5.78437	2.40647e-05	0.00135039	1.81869
POSTN	ES	25673	18:19:00	16	20	0	1	0.2456	0.0258	-0.0271083	0.957075	-3.37239	0.00256214	0.0390237	-3.21258
POSTN	ES	25674	19	16	20	0	0.9965	0.2309	0.0362	-0.0494522	0.927228	-4.83319	7.36277e-05	0.0030606	0.340737
POSTN	ES	25675	17:18:00	16	19	0	0.9843	0.7578	0.0949	-0.138562	0.174798	-4.18271	0.00043407	0.0108058	-1.34801
POSTN	ES	25677	17	16	18	0	0.986	0.4592	0.0583	-0.093181	0.107133	-4.43309	0.00023979	0.0071245	-0.754214
VWA8	AT	25741	26.2	NA	NA	0	1	0.5819	0.0882	0.066975	0.148908	3.96168	0.000594551	0.0135206	-1.78135
VWA8	AT	25742	45	NA	NA	0	1	0.5819	0.0882	-0.066975	0.851092	-3.96168	0.000594551	0.0135206	-1.78135
TSC22D1	AP	25782	1.1	NA	NA	0	1	0.5063	0.0515	0.0696542	0.0561313	6.12327	2.6979e-06	0.000249558	3.6373
TSC22D1	AP	25783	2	NA	NA	0	1	0.5063	0.0515	-0.0696583	0.943867	-6.12394	2.69349e-06	0.000249558	3.63896
FNDC3A	AP	25870	1	NA	NA	0	0.9948	0.9818	0.1401	-0.119133	0.396121	-3.46336	0.00205066	0.0334206	-2.99606
CAB39L	AP	25883	1	NA	NA	0	0.9145	1	0.2471	0.303235	0.410168	4.7205	9.72315e-05	0.00369564	0.0615306
CAB39L	AP	25885	4.1	NA	NA	0	0.9145	1	0.2454	-0.30823	0.587387	-4.86961	6.7307e-05	0.00284907	0.430952
EBPL	ES	25912	4.1:4.2	1	6	1	0.9215	0.6524	0.1307	-0.104906	0.732224	-3.89971	0.00119667	0.0228011	-2.16038
TRIM13	AD	25922	1.2	1.1	1.4	0	0.9703	1	0.1529	0.139482	0.520498	4.07649	0.000515416	0.0121886	-1.56229
DHRS12	ES	25953	3	2	4	0	0.9965	0.8562	0.1553	-0.119733	0.675338	-3.46312	0.0020519	0.0334283	-2.99664
NEK5	AT	25981	25	NA	NA	0	0.9983	0.6486	0.1343	-0.246317	0.242308	-7.01469	3.26016e-07	4.64568e-05	5.7892
NEK5	AT	25982	22.2	NA	NA	0	0.9983	0.6486	0.1343	0.246312	0.757694	7.01458	3.26097e-07	4.64568e-05	5.78895
LMO7	AP	26060	1	NA	NA	0	0.8866	1	0.2218	0.26121	0.155161	4.25395	0.000403285	0.0103033	-1.22773
LMO7	AP	26061	5.1	NA	NA	0	0.8866	1	0.2218	-0.26121	0.844839	-4.25395	0.000403285	0.0103033	-1.22773
LMO7	AA	26065	19.1	18	19.2	0	0.9983	0.8043	0.1508	-0.177154	0.663202	-6.10566	2.81549e-06	0.000259889	3.59397
LMO7	ES	26066	10:11:12	9	13	0	0.9773	1	0.1515	-0.123565	0.186309	-3.85549	0.000824236	0.017229	-2.06683
LMO7	ES	26067	12	9	13	0	0.986	0.9659	0.2594	-0.364387	0.767698	-8.33261	1.72569e-08	5.4549e-06	8.79537
LMO7	ES	26068	10:11:00	9	12	0	0.9913	1	0.1027	0.0816542	0.0592146	3.71942	0.001089	0.0213039	-2.37722
SCEL	ES	26087	6	5	7	0	0.9023	0.9469	0.2667	0.753295	0.527291	15.3255	5.24821e-12	1.09808e-08	17.5273
ABCC4	AT	26108	23	NA	NA	0	1	0.4008	0.0608	0.0491917	0.0736583	4.27122	0.000272856	0.00785117	-1.00958
ABCC4	AT	26110	34	NA	NA	0	1	0.4008	0.0608	-0.0491917	0.926342	-4.27122	0.000272856	0.00785117	-1.00958
MBNL2	ES	26140	9	8	10	1	0.8656	0.6485	0.1499	0.195818	0.151602	4.41051	0.000402249	0.0103033	-1.0607
MBNL2	ES	26141	09:10:00	8	11	0	0.918	1	0.2375	0.260052	0.167564	5.51443	1.392e-05	0.000876239	2.02128
MBNL2	ES	26142	10	8	11	1	0.9581	0.6814	0.1389	0.153812	0.561802	5.24515	2.34817e-05	0.00132444	1.44731
MBNL2	ES	26144	7	6.3	8	0	0.9668	0.9217	0.1707	0.202237	0.224527	6.34669	1.57464e-06	0.000161651	4.18457
FARP1	AP	26162	1	NA	NA	0	0.9546	0.7041	0.1295	-0.141086	0.263335	-4.74763	0.000101506	0.00380221	0.0627892
FARP1	AP	26163	2	NA	NA	0	0.9546	0.7041	0.1295	0.141091	0.736667	4.74783	0.000101459	0.00380221	0.0632602
DOCK9	AP	26171	1	NA	NA	0	0.897	1	0.2222	0.239545	0.506337	4.22884	0.000356327	0.00947751	-1.19484
DOCK9	AP	26172	3	NA	NA	0	0.897	1	0.2135	-0.302291	0.462067	-7.64032	1.41097e-07	2.41226e-05	6.76126
DOCK9	AT	26173	35.2	NA	NA	0	1	0.1423	0.0204	0.0219292	0.0187313	3.66292	0.00125306	0.0235287	-2.51485
ITGBL1	AT	26207	12.2	NA	NA	0	1	0.6749	0.0817	0.125883	0.740592	7.86253	4.79424e-08	1.17681e-05	7.74874
ITGBL1	AT	26208	13	NA	NA	0	1	0.6749	0.0817	-0.125883	0.259408	-7.86253	4.79424e-08	1.17681e-05	7.74874
ARGLU1	AP	26231	2	NA	NA	0	1	0.5227	0.0875	-0.103446	0.146785	-3.68776	0.00117815	0.022536	-2.45441
ARGLU1	AP	26232	1	NA	NA	0	1	0.5227	0.0875	0.103446	0.853215	3.68776	0.00117815	0.022536	-2.45441
CARKD	RI	26256	7.2	7.1	7.3	0	0.9825	0.8211	0.1282	0.153973	0.277657	3.82362	0.000949697	0.0191588	-2.16797
ANKRD10	AT	26270	6.2	NA	NA	0	1	0.7087	0.1177	0.0726	0.27385	3.96644	0.000587489	0.0134094	-1.76955
ANKRD10	AT	26271	8	NA	NA	0	1	0.7087	0.1177	-0.0726	0.72615	-3.96644	0.000587489	0.0134094	-1.76955
MCF2L	AP	26314	1	NA	NA	0	0.9668	0.772	0.1503	0.141425	0.097075	3.36304	0.00262126	0.0395511	-3.23472
MCF2L	AP	26317	8	NA	NA	0	0.9668	1	0.2228	-0.297979	0.513781	-5.65631	8.45383e-06	0.000619973	2.47926
MCF2L	AP	26318	10	NA	NA	0	0.9668	0.8216	0.154	0.139825	0.128183	3.793	0.00090663	0.0184766	-2.19716
GRTP1	AT	26372	8	NA	NA	0	1	0.686	0.0952	0.0634	0.757637	3.25329	0.00342214	0.0474478	-3.49293
GRTP1	AT	26373	7.2	NA	NA	0	1	0.686	0.0952	-0.0634	0.242363	-3.25329	0.00342214	0.0474478	-3.49293
DCUN1D2	ES	26378	5	4	6	0	0.9773	0.6562	0.1483	0.12347	0.784128	3.66744	0.00130661	0.0242338	-2.52036
TMCO3	ES	26380	11	10	12	1	0.9284	0.3426	0.0444	-0.0502722	0.901138	-4.94132	0.000112027	0.00404458	0.175995
TFDP1	AD	26387	13.3	13.2	14	0	0.9983	0.4479	0.0586	-0.0592042	0.801065	-3.6004	0.00146298	0.0261898	-2.66648
TFDP1	ES	26393	7	6	8	0	1	0.2455	0.0354	0.057725	0.910604	6.62361	8.1433e-07	9.39109e-05	4.85579
RNASE1	ES	26468	2.2:2.3:3.1	1	3.2	0	0.9983	0.6009	0.0952	0.100183	0.558436	4.49868	0.000168268	0.00548876	-0.487811
RNASE1	ES	26469	2.3:3.1	1	3.2	0	1	0.643	0.1041	0.122496	0.568323	4.95188	4.89983e-05	0.00224727	0.707036
METTL17	RI	26475	10.2	10.1	10.3	0	0.9965	0.7167	0.1254	-0.148791	0.494732	-4.69575	0.000103361	0.0038608	0.000204839
NDRG2	AP	26484	2	NA	NA	0	0.9634	0.3596	0.0758	-0.0786238	0.16268	-6.20693	4.02669e-06	0.000344583	3.38879
NDRG2	ES	26512	4.5	4.1	5.2	0	0.9319	1	0.1235	0.204926	0.671577	8.51613	7.66569e-08	1.60437e-05	7.60215
ZNF219	AP	26526	2	NA	NA	0	0.8202	1	0.2052	-0.268636	0.517053	-5.55726	7.82099e-05	0.00319851	0.849975
ZNF219	AP	26527	1	NA	NA	0	0.8202	0.744	0.131	0.179743	0.107121	4.07124	0.00120801	0.0229376	-1.97181
HNRNPC	ES	26552	2.4:2.5:2.6	1	3.2	0	1	0.7013	0.1323	-0.0995	0.329204	-3.40665	0.00235641	0.0367279	-3.13127
HNRNPC	ES	26556	2.2:2.3:2.4	1	3.2	0	1	0.7929	0.1351	-0.176917	0.401275	-8.02337	3.3686e-08	9.07441e-06	8.11009
HNRNPC	ES	26558	2.4	1	3.2	0	1	0.5494	0.0713	-0.0680583	0.802946	-3.27344	0.00325916	0.0459198	-3.44575
HNRNPC	AA	26559	2.2:2.3	1	2.4	0	1	0.3677	0.0588	-0.0497583	0.156467	-3.80679	0.000875984	0.0179855	-2.16334
SUPT16H	AT	26571	2	NA	NA	0	1	0.1702	0.0225	0.0206417	0.0258333	3.44339	0.00215364	0.0345373	-3.04376
SUPT16H	AT	26572	28	NA	NA	0	1	0.1702	0.0225	-0.0206417	0.974167	-3.44339	0.00215364	0.0345373	-3.04376
SALL2	RI	26605	3.2:3.3:3.4	3.1	3.5	0	0.9983	0.2215	0.0249	0.0183833	0.990808	3.71176	0.00110994	0.0216259	-2.39592
RBM23	ES	26652	6	5	7	0	0.9983	0.4563	0.0885	0.064	0.905529	4.01971	0.000513971	0.0121688	-1.63743
RBM23	ES	26653	4	3	5	0	0.9965	0.6374	0.0916	-0.0832375	0.50719	-4.04864	0.000477936	0.0115256	-1.56552
PRMT5	ES	26671	2	1.1	3	0	0.9983	0.0986	0.0124	0.0136708	0.99036	3.91284	0.000671955	0.014655	-1.90214
PRMT5	AD	26673	1.2	1.1	2	0	0.9878	0.6041	0.0743	-0.0730136	0.210163	-3.45749	0.00228395	0.0359405	-3.03055
HAUS4	AD	26678	1.3	1.2	2	0	0.9983	0.6727	0.087	0.0773	0.341915	3.31954	0.0030337	0.0436602	-3.34295
ACIN1	AP	26701	1	NA	NA	0	1	0.6905	0.0997	-0.154487	0.572535	-5.06628	3.67564e-05	0.00182692	0.996047
ACIN1	AP	26702	9.1	NA	NA	0	1	0.6905	0.0997	0.154487	0.427465	5.06628	3.67564e-05	0.00182692	0.996047
ACIN1	ES	26708	4	3	5	0	0.9965	0.7591	0.124	-0.155804	0.727844	-6.40502	1.36943e-06	0.000144988	4.32662
DHRS4L2	AP	26795	2	NA	NA	0	0.9913	0.7268	0.1305	-0.0956091	0.80427	-3.33481	0.00305506	0.0438814	-3.3143
DHRS4L2	AP	26796	1	NA	NA	0	0.9913	0.7268	0.1305	0.0956091	0.19573	3.33481	0.00305506	0.0438814	-3.3143
NEDD8	AD	26911	3.2	3.1	4	0	1	0.1145	0.0116	0.00790833	0.0214708	4.18289	0.000340912	0.00928643	-1.23074
TINF2	RI	26931	6.6	6.5	6.7	0	1	0.2446	0.0324	-0.0262583	0.954838	-4.67876	9.75211e-05	0.00370185	0.0168211
TINF2	ES	26936	2:3:4:5	1	6.1	0	1	0.0873	0.0086	0.00875	0.990029	3.59721	0.00147458	0.026316	-2.6742
NFATC4	AP	26983	4.1	NA	NA	0	0.9616	1	0.1808	-0.219368	0.611021	-3.75038	0.00139498	0.0254028	-2.41796
NFATC4	RI	26991	12.3	12.2	12.4	0	1	0.895	0.1407	0.144237	0.547881	3.4907	0.00191749	0.0317389	-2.93064
G2E3	ES	27058	3	1	4	0	0.808	0.4943	0.0777	-0.0802813	0.937514	-4.54544	0.00035082	0.00941046	-0.856343
AKAP6	AT	27135	10.2	NA	NA	0	0.9983	0.691	0.1113	0.155421	0.161569	4.16424	0.000357308	0.00948032	-1.27734
AKAP6	AT	27136	14	NA	NA	0	0.9983	0.691	0.1113	-0.155421	0.838431	-4.16424	0.000357308	0.00948032	-1.27734
NFKBIA	AA	27236	5.1	4	5.2	0	1	0.0384	0.0046	0.00518333	0.989888	3.43565	0.0021949	0.0349691	-3.06222
SFTA3	ES	27255	5	4.2	6	0	0.9721	0.5822	0.0695	-0.0675478	0.871449	-3.54699	0.00175205	0.0297112	-2.80788
SFTA3	ES	27258	3:4.1:4.2:4.3	2	5	1	0.8883	0.8651	0.1335	0.0479895	0.12914	3.42631	0.00289687	0.0424559	-3.14047
SFTA3	ES	27259	4.1:4.2:4.3	2	5	1	0.8831	0.7651	0.1194	0.0876737	0.164416	3.71153	0.00152304	0.0269497	-2.50516
SFTA3	ES	27261	4.2:4.3	2	5	1	0.8883	0.8412	0.1547	0.153437	0.272498	4.93714	9.68328e-05	0.00368686	0.264467
SFTA3	ES	27269	4.2:4.3:5	2	6	1	0.925	0.6183	0.101	0.0708333	0.183329	3.4219	0.00261391	0.0395056	-3.12409
SFTA3	ES	27278	4.2	2	6	1	0.9319	0.7833	0.1363	0.138986	0.373502	4.64666	0.000144738	0.00490702	-0.247062
SFTA3	ES	27280	00:03:04.100000	2	4.2	0	0.9511	0.8765	0.1427	-0.0708773	0.30532	-3.72484	0.00120472	0.0229048	-2.40267
SFTA3	AA	27281	4.1	2	4.2	1	0.9354	0.5164	0.0527	-0.0478333	0.335304	-3.84912	0.000956879	0.0192506	-2.13426
NKX2-1	AP	27286	1	NA	NA	0	0.9651	0.3842	0.0592	-0.0422261	0.225228	-3.6532	0.00135281	0.0247976	-2.55447
NKX2-1	ES	27289	3.2	2	3.4	0	0.8621	1	0.2162	-0.253926	0.479988	-4.30072	0.000401936	0.0103033	-1.17392
MIPOL1	AT	27299	17	NA	NA	0	1	0.7526	0.1345	0.110254	0.743373	3.98446	0.000561525	0.0130197	-1.72489
MIPOL1	AT	27300	20	NA	NA	0	1	0.7339	0.1316	-0.107867	0.250758	-3.90193	0.000690574	0.0149544	-1.92909
ATP5S	AT	27466	7.2	NA	NA	0	1	0.4438	0.0669	0.0512792	0.826252	3.27539	0.00324376	0.0457836	-3.44117
ATP5S	AT	27467	5.2	NA	NA	0	1	0.4438	0.0657	-0.0523875	0.16714	-3.25768	0.00338593	0.0471092	-3.48265
CNIH1	ES	27582	5	3	6.1	0	1	0.0935	0.0158	0.0118833	0.970712	3.24361	0.00350317	0.0481308	-3.51555
CNIH1	ES	27583	4	3	5	0	1	0.0347	0.0051	0.00697083	0.00427292	3.48049	0.00196623	0.032393	-2.9551
SAMD4A	ES	27598	13	12	14	0	0.9232	0.8316	0.097	0.095015	0.129548	4.17416	0.000485155	0.0116549	-1.41278
KTN1	ES	27634	42	41	43	0	1	0.5412	0.0918	-0.0662167	0.511233	-3.41901	0.0022862	0.0359445	-3.10186
KTN1	ES	27638	26	25	27	0	1	0.0642	0.0068	0.00757917	0.992102	3.97937	0.000568738	0.0131661	-1.73751
L3HYPDH	AP	27738	2	NA	NA	0	0.9965	1	0.1384	0.155171	0.142835	3.38732	0.00247041	0.0380458	-3.17717
L3HYPDH	AP	27739	1	NA	NA	0	0.9965	1	0.1384	-0.155171	0.857165	-3.38732	0.00247041	0.0380458	-3.17717
SYNE2	ES	27846	118	117.2	119.2	0	0.9791	0.9554	0.1891	-0.247891	0.527566	-4.68693	0.000105638	0.00388738	-0.0216472
CHURC1	ES	27912	3.2	2	4	0	1	0.5535	0.0531	-0.0389167	0.922158	-4.28762	0.000261798	0.00760773	-0.968451
RAD51B	AT	28107	13	NA	NA	0	1	0.733	0.1303	-0.128258	0.404921	-4.17989	0.000343501	0.00931108	-1.23825
SRSF5	AD	28163	2.2	2.1	4	0	1	0.3058	0.0423	0.0445833	0.7037	3.30399	0.00302638	0.0436602	-3.37404
COX16	ES	28178	3	1	4	1	1	0.1459	0.0285	-0.0297333	0.945325	-5.16702	2.85516e-05	0.00150664	1.25032
NUMB	ES	28288	13	12	14	0	1	0.9293	0.2221	0.489967	0.384254	13.0089	2.93559e-12	8.42337e-09	17.7131
NUMB	ES	28293	11	10	12	0	1	0.1177	0.0219	0.0373625	0.954269	5.74525	6.78996e-06	0.000524256	2.70115
COQ6	AP	28338	2	NA	NA	0	0.9948	0.455	0.0719	0.0620182	0.832426	4.01961	0.000591506	0.0134801	-1.69906
COQ6	AP	28340	1	NA	NA	0	0.9948	0.3882	0.069	-0.0546636	0.146874	-4.08006	0.000510975	0.0121161	-1.55369
FLVCR2	AT	28510	14	NA	NA	0	1	0.377	0.0481	0.0632042	0.0804479	3.97803	0.000570654	0.0131955	-1.74083
FLVCR2	AT	28511	13	NA	NA	0	1	0.377	0.0481	-0.0632083	0.919554	-3.9776	0.000571275	0.0131955	-1.7419
TTLL5	ES	28526	17	16	18	0	0.925	0.9466	0.1594	-0.156695	0.509715	-3.79352	0.00102117	0.0202177	-2.23963
GPR68	AP	28871	2	NA	NA	0	0.8761	0.8676	0.1683	0.158178	0.843928	5.00312	9.81501e-05	0.00371449	0.310673
GPR68	AP	28872	1	NA	NA	0	0.8761	0.8676	0.1683	-0.158178	0.156073	-5.00312	9.81501e-05	0.00371449	0.310673
CCDC88C	AT	28876	5	NA	NA	0	1	0.6122	0.0808	0.0449125	0.112381	4.26412	0.000277785	0.00796328	-1.02738
CCDC88C	AT	28877	33	NA	NA	0	1	0.6122	0.0808	-0.0449125	0.887619	-4.26412	0.000277785	0.00796328	-1.02738
TC2N	ES	28885	10	9	11	0	1	0.2167	0.028	-0.0326333	0.955533	-3.36215	0.00262693	0.0396231	-3.23682
FBLN5	ME	28892	6|7	5	8	0	1	1	0.0883	-0.149462	0.128106	-5.96644	3.94972e-06	0.00034028	3.25037
FBLN5	ES	28893	7	5	8	0	1	1	0.1959	0.196729	0.32746	3.9187	0.00066218	0.0145239	-1.88768
SERPINA1	ES	29117	2.1:2.2:2.4	1.1	2.5	0	0.8883	0.9889	0.161	0.115261	0.262081	3.68563	0.00124983	0.023488	-2.47673
SERPINA1	ES	29125	2.1:2.2	1.1	2.4	0	0.9127	1	0.1517	0.1355	0.235625	3.8688	0.000750266	0.0159329	-2.01081
AK7	AT	29200	18	NA	NA	0	0.993	0.9488	0.217	-0.25603	0.623868	-5.47081	1.54708e-05	0.000954711	1.91435
AK7	AT	29201	2.2	NA	NA	0	0.993	0.9488	0.217	0.25603	0.376132	5.47081	1.54708e-05	0.000954711	1.91435
PAPOLA	ES	29205	19	18	20	0	1	0.4696	0.0409	-0.0354708	0.968773	-3.2649	0.00332726	0.0464991	-3.46575
PAPOLA	ES	29206	19:20:00	18	21	1	0.9599	0.2911	0.041	-0.048485	0.924845	-3.68189	0.00151695	0.0268866	-2.54701
PAPOLA	ES	29207	20	18	21	1	0.9162	0.8235	0.1536	0.156029	0.270451	3.60621	0.00298181	0.0433393	-2.88826
PAPOLA	RI	29208	9.2	9.1	9.3	0	1	0.8024	0.131	-0.128746	0.35789	-3.43833	0.00218053	0.0348129	-3.05583
EVL	AP	29239	1	NA	NA	0	0.9965	0.9548	0.1403	0.1173	0.118283	4.48826	0.00015776	0.00523936	-0.463904
EVL	AP	29241	3	NA	NA	0	0.9965	0.9548	0.1519	-0.134375	0.83815	-4.3714	0.000211906	0.0065706	-0.758052
PPP2R5C	AP	29313	1	NA	NA	0	1	0.7586	0.1265	-0.125042	0.447071	-3.63543	0.00134144	0.0246709	-2.5816
PPP2R5C	AP	29314	5	NA	NA	0	1	0.7586	0.1265	0.125042	0.552933	3.63528	0.00134197	0.0246709	-2.58199
PPP2R5C	AT	29317	20.2	NA	NA	0	1	0.595	0.1013	0.106192	0.248237	6.66878	7.31906e-07	8.78647e-05	4.96451
PPP2R5C	AT	29319	3	NA	NA	0	1	0.4582	0.0756	-0.0641083	0.282137	-4.17101	0.000351273	0.00941111	-1.26044
WDR20	AT	29340	7.3	NA	NA	0	1	0.5721	0.0851	0.101508	0.543879	5.51818	1.18978e-05	0.000783756	2.13361
MARK3	ES	29447	17	16	18	0	0.9267	1	0.1994	-0.206135	0.766355	-3.81124	0.00112482	0.0218297	-2.25076
MARK3	ES	29448	17:18:00	16	19	0	1	0.7452	0.14	-0.285183	0.323979	-7.40389	1.33654e-07	2.35843e-05	6.69997
MARK3	ES	29450	17	16	19	0	1	0.7339	0.0982	-0.111733	0.188638	-4.56925	0.00012858	0.00445901	-0.259679
APOPT1	ES	29464	2	1	5	1	0.7574	0.6688	0.135	0.126767	0.534148	4.47485	0.000821823	0.0171949	-1.39981
KLC1	AT	29467	19	NA	NA	0	1	0.8017	0.1339	-0.240275	0.618537	-7.10859	2.62442e-07	3.93556e-05	6.01063
KLC1	AT	29468	14.3	NA	NA	0	1	0.8633	0.1185	0.201558	0.212508	5.00532	4.28376e-05	0.00204587	0.842072
KLC1	AD	29478	13.3	13.2	14.1	0	0.9825	0.5075	0.0911	-0.0983333	0.792116	-4.22018	0.000397155	0.0102287	-1.25926
KLC1	AA	29491	13.1	12	13.2	0	1	0.4029	0.0512	0.0599042	0.0694396	4.92311	5.26762e-05	0.00236414	0.634335
XRCC3	AP	29493	3.1	NA	NA	0	0.9459	0.9208	0.2288	-0.25749	0.610198	-4.21008	0.000446416	0.0110071	-1.3295
XRCC3	AP	29494	1.1	NA	NA	0	0.9459	0.9208	0.2288	0.25749	0.389802	4.21008	0.000446416	0.0110071	-1.3295
C14orf2	ES	29533	03:05:00	2	7.1	1	0.8482	0.9226	0.1731	0.194486	0.443047	5.5607	7.77415e-05	0.00318342	0.856218
C14orf2	ES	29536	3	2	5	0	1	0.1313	0.0098	0.0117875	0.0132563	3.36169	0.00262991	0.0396408	-3.23792
INF2	AT	29545	5.2	NA	NA	0	1	0.7365	0.1021	0.124917	0.121433	3.7221	0.00108176	0.0211905	-2.37068
INF2	AT	29546	23	NA	NA	0	1	0.7365	0.1021	-0.124921	0.878569	-3.72221	0.00108147	0.0211905	-2.37042
MTA1	ES	29647	4	3	5	0	0.993	0.6205	0.1183	-0.168387	0.827819	-5.60607	9.57081e-06	0.000668557	2.35369
CRIP1	AT	29652	5	NA	NA	0	1	0.4609	0.0667	-0.0516208	0.948031	-4.83955	6.50122e-05	0.00276525	0.423142
CRIP1	AT	29653	8	NA	NA	0	1	0.4609	0.0667	0.0516208	0.0519688	4.83955	6.50122e-05	0.00276525	0.423142
C14orf80	ES	29661	9	8	10	0	0.9756	0.9332	0.1371	-0.153705	0.411504	-4.0625	0.000533177	0.0125076	-1.59596
NIPA1	AP	29687	3	NA	NA	0	1	0.629	0.1286	0.139629	0.247594	3.90895	0.000678546	0.014774	-1.91176
NIPA1	AP	29688	2	NA	NA	0	1	0.7181	0.1291	-0.127896	0.678623	-4.03214	0.000498167	0.0118938	-1.60654
FAN1	AT	29777	16	NA	NA	0	1	0.5716	0.0866	-0.0939833	0.834621	-4.47172	0.000164486	0.00540552	-0.505559
FAN1	AT	29778	5.2	NA	NA	0	1	0.5716	0.0866	0.0939833	0.165379	4.47172	0.000164486	0.00540552	-0.505559
MTMR10	ES	29794	7	6	9	0	0.9005	0.4657	0.0848	-0.0591545	0.934248	-3.43931	0.00238486	0.0370399	-3.0728
EMC4	AD	29847	2.3	2.2	3.1	0	0.9965	0.1117	0.0195	-0.0208083	0.0444583	-3.45344	0.00210119	0.0340673	-3.01976
MEIS2	AP	29905	1	NA	NA	0	0.9948	1	0.1373	0.182471	0.241335	6.46705	1.18094e-06	0.000128119	4.4773
MEIS2	AP	29907	4.1	NA	NA	0	0.9948	0.545	0.0944	-0.102279	0.142727	-4.78236	7.5094e-05	0.00310686	0.278576
PLCB2	AT	29963	8	NA	NA	0	1	0.2243	0.0275	0.0392167	0.0339833	3.53103	0.00173628	0.0295582	-2.83381
PLCB2	AT	29964	31	NA	NA	0	1	0.2243	0.0275	-0.0392167	0.966017	-3.53103	0.00173628	0.0295582	-2.83381
GCHFR	AP	30030	2	NA	NA	0	0.9983	0.2478	0.0193	0.014325	0.0178	3.26217	0.00334932	0.0467479	-3.47214
PLA2G4F	ES	30127	3.3:4:5.1	3.2	5.2	0	0.8709	0.2401	0.0393	0.0223864	0.985537	4.39117	0.000240425	0.00713288	-0.801989
GANC	AT	30140	15	NA	NA	0	1	0.2866	0.0424	-0.0495708	0.113994	-4.69475	9.36644e-05	0.00362593	0.0572114
GANC	AT	30141	29	NA	NA	0	1	0.5883	0.1104	0.109875	0.386433	4.7942	7.28845e-05	0.00303545	0.308515
CAPN3	AP	30147	18	NA	NA	0	0.9843	0.6208	0.1127	-0.105821	0.265294	-4.21028	0.000318178	0.00885376	-1.16224
CAPN3	AP	30149	1	NA	NA	0	0.9843	0.973	0.1276	0.140296	0.38896	4.27814	0.000268132	0.00773042	-0.992217
ZNF106	AP	30162	1	NA	NA	0	0.8168	0.7788	0.139	0.197833	0.751787	6.96538	7.7976e-07	9.19416e-05	5.06975
ZNF106	AP	30163	4.1	NA	NA	0	0.8168	0.7788	0.139	-0.197833	0.248213	-6.96538	7.7976e-07	9.19416e-05	5.06975
CCNDBP1	ES	30220	10.1	9	10.3	0	1	0.5623	0.0731	-0.058425	0.146179	-4.16332	0.000358138	0.00949086	-1.27964
CCNDBP1	ES	30222	3	2	4	0	1	0.1456	0.0154	0.019425	0.97985	5.61391	9.38715e-06	0.000657819	2.37329
PPIP5K1	ES	30268	28	27	29	0	0.8953	0.8956	0.1807	0.19212	0.549632	4.63462	0.00034599	0.00933465	-0.76985
EIF3J	ES	30342	6	5	7	0	1	0.0648	0.0077	0.0081375	0.992581	3.28971	0.00313312	0.0446089	-3.40759
BLOC1S6	AT	30430	9	NA	NA	0	1	0.774	0.1429	-0.163858	0.312408	-5.48907	1.27889e-05	0.000825139	2.06062
BLOC1S6	AT	30431	4.2	NA	NA	0	1	0.774	0.1429	0.163858	0.687592	5.48907	1.27889e-05	0.000825139	2.06062
BLOC1S6	ES	30456	3	1	7.1	0	0.9825	0.5468	0.0817	0.0713917	0.8603	3.91484	0.000668608	0.0146229	-1.89721
DUT	AP	30484	2.1	NA	NA	0	0.9895	0.8612	0.1565	-0.234017	0.761255	-7.08706	3.5389e-07	4.96781e-05	5.75992
DUT	AP	30485	3.1	NA	NA	0	0.9895	0.8612	0.1556	0.233157	0.229877	7.19276	2.79504e-07	4.13496e-05	6.00126
GALK2	AP	30516	1	NA	NA	0	0.9948	0.7507	0.136	-0.207542	0.727929	-6.77408	5.7129e-07	7.47063e-05	5.21702
GALK2	AP	30518	3.1	NA	NA	0	0.9948	0.678	0.1247	0.1665	0.245721	7.05991	2.93639e-07	4.28634e-05	5.89596
GABPB1	AT	30572	10	NA	NA	0	1	0.4653	0.0753	-0.04825	0.82475	-3.99957	0.00054063	0.0126531	-1.68742
GABPB1	AT	30573	9.2	NA	NA	0	1	0.4653	0.0753	0.0482458	0.175252	3.99943	0.000540818	0.0126531	-1.68776
TRPM7	AA	30600	29.1	28	29.2	0	0.9476	0.7128	0.1107	-0.0864619	0.706851	-3.33134	0.00322767	0.0456738	-3.33014
GNB5	AT	30638	13	NA	NA	0	1	0.1579	0.0224	-0.0199917	0.981287	-4.05618	0.000468959	0.0113809	-1.54676
GNB5	AT	30640	5.2	NA	NA	0	1	0.1579	0.0224	0.0199917	0.0187125	4.05618	0.000468959	0.0113809	-1.54676
MYO5A	ES	30660	35	34	36	0	0.9005	0.8293	0.1788	-0.190757	0.489449	-6.19088	4.17234e-06	0.000351575	3.35249
CCPG1	AP	30722	1	NA	NA	0	0.9913	0.7571	0.0942	-0.106442	0.782417	-4.35088	0.000223169	0.00675317	-0.809617
CCPG1	AP	30723	2	NA	NA	0	0.9913	0.7571	0.0942	0.106446	0.217581	4.35104	0.000223079	0.00675317	-0.809215
CCPG1	RI	30726	9.4	9.3	9.5	0	1	0.6039	0.1059	0.131921	0.619977	6.03398	3.35069e-06	0.000296819	3.41728
DYX1C1	AT	30735	11	NA	NA	0	1	0.629	0.1221	-0.0841667	0.318858	-3.36114	0.00263339	0.0396797	-3.2392
RFX7	AT	30750	9.2	NA	NA	0	1	0.3367	0.0564	0.0409292	0.928369	3.37634	0.00253756	0.038754	-3.20322
RFX7	AT	30752	11	NA	NA	0	1	0.3367	0.0564	-0.0409292	0.0716312	-3.37634	0.00253756	0.038754	-3.20322
ZNF280D	AT	30770	13.2	NA	NA	0	1	0.5413	0.0703	0.0510583	0.156963	3.87308	0.000742271	0.0157937	-2.00026
TCF12	ES	30789	18	17	19	0	0.9668	0.7598	0.1456	0.174191	0.155319	4.07239	0.000483014	0.0116098	-1.53809
GCOM1	AT	30798	14.2	NA	NA	0	0.9564	0.7002	0.1412	-0.156792	0.769162	-5.16036	2.90321e-05	0.00152403	1.23351
GCOM1	AT	30799	20	NA	NA	0	0.9564	0.6463	0.1243	0.138625	0.20175	5.53161	1.15082e-05	0.000762667	2.16727
SLTM	ES	30918	5	4.2	6	0	1	0.1334	0.0201	-0.0180333	0.984517	-3.79757	0.00089636	0.0183353	-2.18596
NARG2	AT	30959	16	NA	NA	0	1	0.607	0.0809	-0.123738	0.849344	-4.04624	0.000480832	0.0115694	-1.5715
NARG2	AT	30962	9.2	NA	NA	0	1	0.607	0.0809	0.123738	0.150656	4.04624	0.000480832	0.0115694	-1.5715
NARG2	AA	30965	4.1	3	4.2	0	0.9983	0.7381	0.1203	0.0831792	0.625348	3.36617	0.0026013	0.0394183	-3.2273
TPM1	AD	30987	12.2	12.1	13.1	0	0.8202	0.8777	0.1727	0.226	0.752392	4.81814	0.000242407	0.00717231	-0.404813
FBXL22	AT	31065	3	NA	NA	0	0.9948	0.7116	0.1599	-0.162738	0.846627	-4.76563	7.83298e-05	0.00319851	0.236294
FBXL22	AT	31066	2	NA	NA	0	0.9948	0.7116	0.1599	0.162742	0.153375	4.76545	7.83645e-05	0.00319851	0.23585
FAM96A	ES	31084	4	3	5.1	0	1	0.4208	0.0663	-0.06495	0.809671	-4.51112	0.00014891	0.00501364	-0.40628
KIAA0101	ES	31115	3	2	5	0	0.9948	0.3275	0.0499	0.0613136	0.897841	3.56063	0.00178594	0.0300424	-2.78972
ANKDD1A	AT	31137	8.2	NA	NA	0	1	0.5583	0.0938	0.137075	0.270942	7.22627	2.00288e-07	3.25935e-05	6.28664
ANKDD1A	AT	31138	16	NA	NA	0	1	0.5583	0.0938	-0.137075	0.729058	-7.22627	2.00288e-07	3.25935e-05	6.28664
SNAPC5	ES	31277	1.2:2.1	1.1	3.1	0	0.9494	1	0.1955	0.236119	0.3257	3.98189	0.00111918	0.0217298	-2.0331
SMAD3	AP	31299	3	NA	NA	0	0.9983	0.4329	0.0732	0.0747375	0.0576729	3.42139	0.00227293	0.035795	-3.0962
IQCH	AT	31311	24	NA	NA	0	0.986	0.8784	0.1779	-0.1457	0.764151	-3.39786	0.00251321	0.0385698	-3.15998
IQCH	AT	31314	13.2	NA	NA	0	0.986	0.8453	0.1567	0.123	0.17386	4.18952	0.000361621	0.00956012	-1.25066
LARP6	AT	31442	4	NA	NA	0	1	0.8725	0.1669	-0.169862	0.640023	-4.75405	8.06501e-05	0.00325142	0.207041
LARP6	AT	31443	2	NA	NA	0	1	0.8725	0.1669	0.169862	0.359977	4.75405	8.06501e-05	0.00325142	0.207041
PKM	AP	31506	1	NA	NA	0	1	0.0734	0.0043	-0.00462083	0.00504375	-4.45443	0.000171831	0.00558838	-0.549133
NEO1	ES	31597	27	26	28	0	0.9965	0.4028	0.0592	0.118858	0.903054	5.47896	1.31138e-05	0.00084332	2.03527
ISLR	AP	31676	2	NA	NA	0	0.9825	0.8407	0.1935	0.399577	0.333746	9.98056	1.49581e-09	8.11392e-07	11.4391
ISLR	AP	31677	1	NA	NA	0	0.9825	0.8407	0.1935	-0.399573	0.666257	-9.98077	1.49524e-09	8.11392e-07	11.4395
STRA6	AD	31688	18.2	18.1	19	0	0.9983	0.9393	0.2777	-0.389562	0.716752	-5.14605	3.00922e-05	0.00156231	1.1974
UBL7	AD	31719	1.3:1.4	1.2	3	0	0.9913	0.9918	0.103	0.113896	0.200644	3.99429	0.000547835	0.01279	-1.70051
MPI	AT	31774	5.2	NA	NA	0	1	0.2584	0.0432	0.0610458	0.0761771	6.74903	6.05903e-07	7.76156e-05	5.15706
MPI	AT	31775	8	NA	NA	0	1	0.4202	0.0695	-0.0983208	0.82759	-4.35732	0.000219572	0.00668577	-0.79344
SCAMP5	ES	31823	7	6	8.2	0	0.836	0.957	0.1925	-0.317069	0.56512	-4.40719	0.000759581	0.0160841	-1.41323
PPCDC	ES	31835	2	1	3.2	1	0.7644	0.3839	0.0772	0.0653222	0.797179	4.13105	0.00280629	0.0415861	-2.32977
COMMD4	AP	31840	1	NA	NA	0	0.9913	0.1552	0.0258	-0.0208	0.973483	-3.31079	0.00323336	0.0457211	-3.36948
COMMD4	AP	31841	2	NA	NA	0	0.9913	0.1552	0.0258	0.0208	0.0265174	3.31079	0.00323336	0.0457211	-3.36948
COMMD4	ES	31852	4	3	5.2	0	0.9983	0.2079	0.0207	-0.0298375	0.972665	-3.74495	0.00102198	0.0202177	-2.31486
SNUPN	AD	31884	1.2	1.1	4	0	0.9878	1	0.1492	0.123332	0.237674	3.53834	0.00188363	0.0313022	-2.84194
WDR61	AA	32085	2.1	1	2.2	0	0.9965	0.3607	0.0353	0.0560261	0.0554319	3.54175	0.00177449	0.0298726	-2.82033
MORF4L1	ES	32130	6	5	7	0	1	0.1427	0.0143	0.0138458	0.0355938	3.59971	0.00146548	0.0262026	-2.66815
TMED3	ES	32155	3	2	4	0	1	0.2684	0.0251	0.0320167	0.0278792	3.49836	0.00188168	0.0312816	-2.91226
MTHFS	AD	32161	1.2	1.1	2.1	0	0.9983	0.7298	0.0971	-0.0698958	0.413719	-3.31535	0.00294393	0.0429593	-3.34728
ZFAND6	AA	32171	7.1	6	7.2	0	1	0.1486	0.0127	-0.0142167	0.9878	-4.69974	9.24938e-05	0.00358693	0.0698034
SH3GL3	ES	32281	02:03:04	1	5	0	0.9948	0.8352	0.1779	0.411683	0.765729	10.6834	1.60124e-10	1.35298e-07	13.6008
SEC11A	ES	32313	06:08:00	5	9	0	0.8307	1	0.1706	-0.1316	0.845548	-3.74527	0.00152881	0.0270236	-2.45946
SEC11A	ES	32316	6	5	8	0	1	0.0668	0.0108	-0.0256667	0.0227792	-7.90628	4.35388e-08	1.09943e-05	7.84737
SEC11A	ES	32319	05:06:00	4	8	1	0.9634	0.8634	0.1774	-0.320784	0.485119	-6.64811	2.58692e-06	0.000242354	3.97014
AKAP13	ES	32356	12	11	14	1	0.8464	0.9303	0.1585	-0.144773	0.634583	-4.50921	0.000180634	0.00582297	-0.515772
MFGE8	ES	32404	8	7	9.1	0	1	0.2414	0.0324	-0.0286042	0.96239	-3.92597	0.00065022	0.0143421	-1.8697
PEX11A	ES	32438	2	1	3.1	0	0.9616	0.6071	0.1125	0.155235	0.78463	5.19715	3.01199e-05	0.00156231	1.24096
PRC1	ES	32529	14	13.2	15	0	0.801	0.8441	0.1583	-0.1533	0.494162	-6.3548	0.00190577	0.0316343	-0.98419
MCTP2	AA	32589	12.1	11.2	12.2	0	0.9529	0.676	0.1243	0.213792	0.790238	5.26616	2.22808e-05	0.00126483	1.50023
SNRPA1	ES	32758	6	5	7	0	1	0.285	0.0452	0.0735208	0.913323	5.37513	1.69775e-05	0.00101923	1.77448
NPRL3	ES	32804	5	4	6	0	0.9983	0.5401	0.09	-0.103	0.846192	-5.95075	4.10379e-06	0.000348766	3.21155
PIGQ	AT	32901	6.4	NA	NA	0	1	0.3783	0.0515	0.0559792	0.0559687	3.45047	0.0021166	0.0342007	-3.02687
PIGQ	AT	32902	14	NA	NA	0	1	0.3783	0.0515	-0.0559792	0.944031	-3.45047	0.0021166	0.0342007	-3.02687
C16orf13	ES	32916	03:04:00	2	5	0	0.9983	0.5369	0.0486	-0.03115	0.952812	-3.75382	0.000999633	0.0199373	-2.29315
C16orf13	ES	32917	3	2	5	0	0.9843	0.5545	0.085	-0.101333	0.861811	-5.29692	3.16369e-05	0.00162201	1.28959
C16orf13	ES	32919	02:03:04	1	5	0	0.9983	0.6814	0.1016	-0.117275	0.925562	-4.70696	9.08225e-05	0.00354087	0.0880598
C16orf13	ES	32921	02:03:00	1	5	0	0.9895	0.8006	0.15	-0.224714	0.854428	-5.32189	2.56506e-05	0.00140346	1.45107
C16orf13	ES	32924	2	1	3	0	0.9965	0.6196	0.1096	-0.165308	0.885808	-5.9072	4.56438e-06	0.00037432	3.10366
FAM195A	ES	32927	3	2	4	0	0.9878	0.8768	0.1383	-0.171291	0.627567	-5.48241	1.75415e-05	0.00104154	1.83614
MSLN	RI	33001	1.2	1.1	1.3	0	0.836	0.7939	0.1578	0.209679	0.651632	5.33912	0.00011485	0.00412571	0.450991
UNKL	AP	33077	17.1	NA	NA	0	0.7888	0.8957	0.2182	0.2794	0.206032	4.76572	0.00115291	0.0221983	-1.38261
UNKL	AP	33078	1	NA	NA	0	0.7888	0.8957	0.2182	-0.2794	0.793968	-4.76572	0.00115291	0.0221983	-1.38261
HN1L	ES	33123	3.1	1.2	4	0	0.9983	0.5733	0.0883	0.0869957	0.133715	3.85779	0.000819588	0.0171726	-2.06124
HAGH	ES	33146	6	5	7	0	0.9983	0.3071	0.0281	-0.0216917	0.973258	-4.05488	0.000470493	0.0113864	-1.54999
SLC9A3R2	AP	33186	3	NA	NA	0	0.9895	0.9062	0.1752	-0.221904	0.56319	-5.9305	4.31172e-06	0.000360152	3.16142
SLC9A3R2	AP	33187	1	NA	NA	0	0.9895	0.9137	0.1715	0.233846	0.387373	5.78501	6.1577e-06	0.000484002	2.80017
TSC2	ES	33192	33	32	34	0	0.9895	0.4567	0.0611	-0.051913	0.136585	-3.39395	0.00253699	0.038754	-3.16914
TSC2	ES	33193	27	26	28.1	0	0.9948	0.8063	0.1557	0.123567	0.249238	3.82376	0.00083965	0.0175012	-2.12166
TSC2	ES	33198	5	4	6	0	0.9895	0.2631	0.0225	-0.0252833	0.985521	-3.40247	0.00238059	0.0370128	-3.14119
MLST8	AP	33211	2	NA	NA	0	0.9756	0.7499	0.1491	0.142977	0.412998	3.9732	0.000661779	0.0145239	-1.81043
MLST8	AP	33212	1	NA	NA	0	0.9756	0.7499	0.1491	-0.142973	0.587004	-3.97304	0.000662035	0.0145239	-1.81082
TCEB2	AP	33298	1	NA	NA	0	0.9948	0.3425	0.0275	-0.0203478	0.9661	-4.25244	0.000309503	0.00868387	-1.09583
TCEB2	AP	33299	2.1	NA	NA	0	0.9948	0.3425	0.0275	0.0203478	0.0339	4.25244	0.000309503	0.00868387	-1.09583
PKMYT1	AA	33330	9.1:9.2	8	9.3	0	0.986	0.8126	0.1236	-0.166877	0.70523	-4.22871	0.000356439	0.00947751	-1.19515
TNFRSF12A	ES	33347	3.1:3.2	2.1	4	0	0.8796	1	0.2159	-0.268907	0.683616	-4.53837	0.000496635	0.0118722	-1.06162
HCFC1R1	ES	33354	2	1.5	3.2	0	0.9913	0.4407	0.0573	-0.0702045	0.904933	-4.90154	7.00615e-05	0.00294862	0.436008
IL32	AA	33419	1.4:1.5:1.6:1.7	1.1	1.8	0	0.9546	0.3434	0.0619	0.0375857	0.0342333	4.78621	0.000104185	0.00387374	0.0840864
IL32	ES	33422	1.4:1.5:1.6	1.1	1.8	0	0.9546	0.1062	0.0135	0.00879524	0.00634444	3.6984	0.00136602	0.024998	-2.48628
IL32	ES	33425	1.4:1.5	1.1	1.8	0	0.9546	0.1458	0.0234	0.0162857	0.0127067	3.47304	0.00231943	0.0362674	-3.00703
IL32	AA	33428	1.4:1.5:1.6:1.7:1.8	1.1	1.9	0	0.986	0.1928	0.0262	0.0132417	0.01285	4.22253	0.000308501	0.00867792	-1.13157
IL32	ES	33438	1.4:1.5:1.6	1.1	1.9	0	0.986	0.1293	0.0215	0.0146917	0.0116417	3.40261	0.0023798	0.0370128	-3.14087
IL32	ES	33441	1.4:1.5	1.1	1.9	0	0.986	0.4799	0.093	0.0539208	0.0514479	3.89339	0.000705497	0.0151654	-1.95017
MEFV	ES	33476	6	5	7	0	0.9738	0.6788	0.1386	0.159827	0.756567	3.98441	0.000644079	0.0142401	-1.78355
DNASE1	AT	33604	11	NA	NA	0	0.9913	0.828	0.1468	0.231832	0.48438	6.48111	1.75212e-06	0.000176571	4.18145
DNASE1	AT	33607	13	NA	NA	0	0.9913	0.7985	0.1391	-0.172786	0.449741	-4.10625	0.000479576	0.0115586	-1.49064
CDIP1	AP	33755	2	NA	NA	0	0.9878	0.5266	0.0973	-0.0957217	0.17084	-5.14485	3.42311e-05	0.00172879	1.11186
GLYR1	ES	33864	9	8	10	0	1	0.2622	0.0395	-0.0302917	0.952367	-3.96826	0.000584811	0.0133773	-1.76503
UBN1	ES	33870	18	17	19	0	0.993	0.2689	0.0358	0.0422708	0.95589	3.25888	0.0033761	0.0470171	-3.47984
CLEC16A	AT	34003	22.2	NA	NA	0	1	0.3873	0.0573	0.0389083	0.0630458	3.31136	0.00297268	0.0432782	-3.3567
CLEC16A	AT	34004	25	NA	NA	0	1	0.3873	0.0573	-0.0389042	0.936956	-3.31091	0.00297592	0.043311	-3.35775
LITAF	AP	34014	3	NA	NA	0	0.9965	0.2907	0.0304	-0.029287	0.0670468	-3.62638	0.00144429	0.0259759	-2.61867
SHISA9	AT	34062	2	NA	NA	0	1	0.502	0.0429	-0.0174083	0.0456208	-4.14461	0.000375419	0.00981854	-1.32638
SHISA9	AT	34063	6	NA	NA	0	1	0.502	0.0429	0.0174083	0.954379	4.14461	0.000375419	0.00981854	-1.32638
NPIPA2	AT	34108	8.2	NA	NA	0	0.9948	0.5924	0.0846	0.0604583	0.129171	3.97074	0.000581193	0.0133415	-1.75891
NPIPA2	AT	34109	9	NA	NA	0	0.9948	0.5924	0.0846	-0.0604583	0.870829	-3.97074	0.000581193	0.0133415	-1.75891
PDXDC1	ES	34124	7.1:7.2	6.2	8	0	1	0.1488	0.0263	-0.01855	0.951417	-3.57385	0.00156219	0.0273573	-2.73062
RRN3	ES	34141	5	4	6	0	0.9983	0.3358	0.0608	-0.0670875	0.95061	-4.43896	0.000178676	0.00577255	-0.588088
NPIPA5	AD	34149	8.2:8.3	8.1	9	0	1	0.8904	0.1539	0.173363	0.447777	4.19127	0.000333789	0.00913772	-1.20979
NPIPA5	ES	34150	8.3	8.1	9	0	1	0.9522	0.1578	0.157938	0.483748	5.46802	1.34749e-05	0.00085806	2.00782
MYH11	ES	34188	42	41	43	0	0.9546	0.7349	0.157	-0.257462	0.341502	-8.09227	7.83149e-08	1.62108e-05	7.43186
NPIPA8	ES	34239	22	20	23	1	0.9983	0.7932	0.1263	0.111829	0.56459	3.91321	0.000671342	0.014655	-1.90124
NPIPA8	ES	34240	21	20	23	1	0.9983	0.7968	0.1359	0.110808	0.3822	4.36257	0.000216685	0.00664517	-0.78026
RPS15A	AD	34266	1.2	1.1	2.2	0	1	0.4715	0.0408	0.038675	0.114317	5.37194	1.7113e-05	0.00102303	1.76646
SMG1	AT	34274	14.2	NA	NA	0	1	0.8326	0.1218	0.0889458	0.321598	3.34155	0.00276216	0.0410846	-3.28551
SMG1	AT	34275	64	NA	NA	0	1	0.8326	0.1218	-0.08895	0.6784	-3.3417	0.00276112	0.041083	-3.28515
TMC5	AP	34304	1.1	NA	NA	0	0.9878	1	0.2442	-0.213743	0.478662	-3.84313	0.000849651	0.0176177	-2.09679
TMC5	AP	34305	2	NA	NA	0	0.9878	1	0.2431	0.185496	0.495532	3.84348	0.00084892	0.0176109	-2.09594
ERI2	AP	34390	3	NA	NA	0	0.9058	0.9655	0.1716	0.175633	0.41385	3.54372	0.0023843	0.0370399	-2.90092
ERI2	AP	34391	1	NA	NA	0	0.9058	0.9655	0.1716	-0.175633	0.58615	-3.54372	0.0023843	0.0370399	-2.90092
C16orf52	AT	35531	4.2	NA	NA	0	1	0.6928	0.0628	0.0754333	0.152171	4.48647	0.000158475	0.00525514	-0.468413
C16orf52	AT	35532	5.3	NA	NA	0	1	0.7461	0.092	-0.0887625	0.653448	-5.11047	3.28987e-05	0.00167304	1.10762
GTF3C1	AD	35695	34.2	34.1	35	0	0.993	0.7432	0.1108	-0.0818217	0.744323	-3.2732	0.0033895	0.047144	-3.45052
CLN3	AP	35707	1	NA	NA	0	0.9424	0.9237	0.156	-0.143745	0.853973	-4.50669	0.000224846	0.00677648	-0.641021
CLN3	AP	35708	3.1	NA	NA	0	0.9424	0.9237	0.156	0.143745	0.146027	4.50669	0.000224846	0.00677648	-0.641021
CLN3	ES	35725	09:10:00	8	11	0	1	0.3067	0.0168	-0.0113083	0.992663	-3.4877	0.00193169	0.0319438	-2.93783
CCDC101	ES	35755	5	4	6	0	1	0.9643	0.1061	0.137167	0.224775	3.50057	0.00187148	0.0311827	-2.90696
SULT1A2	RI	35811	1.2:1.3	1.1	1.4	0	0.986	0.9982	0.3313	0.264917	0.480746	3.71271	0.00110732	0.0215991	-2.39359
EIF3C	AP	35825	1	NA	NA	0	0.9983	0.6947	0.1029	0.098287	0.125779	3.66581	0.00131182	0.024269	-2.52427
EIF3C	AP	35827	2.1	NA	NA	0	0.9983	0.6947	0.1029	-0.098287	0.874221	-3.66581	0.00131182	0.024269	-2.52427
EIF3C	RI	35830	2.2:2.3	2.1	2.4	0	0.9948	0.0609	0.0075	0.00573182	0.00783043	3.93096	0.000732931	0.0156176	-1.91165
ATXN2L	RI	35838	22.3:22.4:22.5:22.6	22.2	22.7	0	1	0.3293	0.0513	0.049575	0.893813	3.30582	0.0030129	0.0436412	-3.36971
SH2B1	AD	35871	9.2	9.1	10	0	0.9913	0.5409	0.0885	0.0940174	0.237198	3.62755	0.00144015	0.0259267	-2.61585
RABEP2	AP	35888	2.1	NA	NA	0	0.986	0.8027	0.1789	0.200482	0.204109	3.97393	0.000660607	0.0145227	-1.80868
RABEP2	AP	35889	1	NA	NA	0	0.986	0.8027	0.1789	-0.200482	0.795891	-3.97393	0.000660607	0.0145227	-1.80868
MAZ	AT	35940	7.4	NA	NA	0	1	0.6145	0.0784	0.0408167	0.945658	3.95867	0.000599047	0.0135815	-1.78879
MAZ	AT	35941	5.2	NA	NA	0	1	0.6145	0.0784	-0.0408167	0.0543417	-3.95867	0.000599047	0.0135815	-1.78879
SEZ6L2	ES	35977	15	14	16	0	0.9948	0.5939	0.0942	-0.120226	0.774153	-3.76242	0.00103571	0.0204527	-2.29193
INO80E	ES	36015	6.1:6.2:6.3	5	11	0	0.9843	0.7814	0.1597	-0.141618	0.732287	-3.35386	0.00292055	0.0427459	-3.27046
INO80E	AA	36018	6.1	5	6.2	0	0.9948	0.7219	0.1157	-0.117318	0.280272	-4.90388	6.96682e-05	0.00293488	0.441681
MAPK3	ES	36088	6.1	5	7.1	0	1	0.2987	0.0348	-0.0347417	0.974308	-4.37907	0.000207841	0.00648127	-0.738762
ZNF785	AT	36161	3.2	NA	NA	0	1	0.4701	0.0496	-0.0336333	0.495117	-3.23152	0.00360697	0.0492337	-3.54375
ZNF785	AT	36162	4	NA	NA	0	1	0.4701	0.0496	0.0336333	0.504883	3.23152	0.00360697	0.0492337	-3.54375
ZNF843	AT	36252	3	NA	NA	0	1	0.4621	0.082	-0.0645833	0.896304	-3.65921	0.00126465	0.0236754	-2.52386
ZNF843	AT	36253	2.2	NA	NA	0	1	0.4621	0.082	0.0645833	0.103696	3.65921	0.00126465	0.0236754	-2.52386
PHKB	ES	36324	2	1	3	0	0.9843	0.4934	0.0852	0.140542	0.852204	5.57547	1.03236e-05	0.000706435	2.27711
SIAH1	AP	36338	7	NA	NA	0	1	0.6484	0.1006	0.108154	0.177223	3.35757	0.00265642	0.0399533	-3.24765
SIAH1	AT	36342	8.3	NA	NA	0	1	0.2353	0.0407	0.032775	0.919492	3.36393	0.00261553	0.0395056	-3.2326
SIAH1	AT	36343	9	NA	NA	0	1	0.2353	0.0407	-0.032775	0.0805083	-3.36393	0.00261553	0.0395056	-3.2326
BRD7	AA	36379	14.1	13	14.2	0	1	0.4591	0.0566	-0.06225	0.328454	-3.44367	0.00215219	0.0345373	-3.0431
RPGRIP1L	AT	36421	28	NA	NA	0	1	0.5498	0.0939	-0.0888375	0.328635	-3.84248	0.00080128	0.0168533	-2.07561
RPGRIP1L	AT	36422	3.2	NA	NA	0	1	0.4959	0.092	0.125404	0.181385	5.82384	5.59791e-06	0.000443173	2.89674
FTO	AP	36426	7.1	NA	NA	0	0.9738	0.8738	0.1785	-0.262408	0.192671	-4.57162	0.000127812	0.00444289	-0.253692
FTO	AP	36427	1	NA	NA	0	0.9738	0.8738	0.1814	0.246708	0.795679	3.80903	0.000871096	0.0179095	-2.15783
HERPUD1	ES	36506	3.2	2.2	4	0	0.9668	0.6165	0.0886	0.150143	0.874024	4.12456	0.000498248	0.0118938	-1.48558
NLRC5	AT	36514	51	NA	NA	0	1	0.148	0.0162	-0.0168583	0.987258	-3.33304	0.00281999	0.0417187	-3.3056
NLRC5	AT	36515	25	NA	NA	0	1	0.148	0.0162	0.0168583	0.0127417	3.33304	0.00281999	0.0417187	-3.3056
GPR56	AP	36573	3.1	NA	NA	0	1	0.7889	0.1213	-0.281058	0.198533	-7.93487	4.08881e-08	1.03846e-05	7.91168
GPR56	AP	36576	1	NA	NA	0	1	0.7812	0.1652	0.260417	0.217417	6.62479	8.12059e-07	9.38954e-05	4.85864
GPR56	AA	36580	16.1	15	16.2	0	0.9965	0.7847	0.0811	-0.0913417	0.374154	-3.58126	0.00153387	0.0270772	-2.71274
KIFC3	ES	36608	28	27	29	0	0.9843	0.4608	0.053	-0.0470864	0.961817	-4.2057	0.000376881	0.00984506	-1.25074
GINS3	ES	36636	3	1	4	0	0.9337	0.5592	0.1193	0.161942	0.786783	4.9934	8.55118e-05	0.00340329	0.390723
CNOT1	AD	36673	19.2	19.1	20	0	0.9634	0.5841	0.0766	0.0711958	0.76056	3.33517	0.00280537	0.0415861	-3.30056
CDH11	ES	36699	3	2	4	0	0.9913	0.1343	0.0165	-0.0147304	0.988936	-3.44976	0.00221742	0.0353004	-3.03797
BEAN1	AT	36708	6.3	NA	NA	0	1	0.6511	0.1073	-0.17955	0.197783	-4.60265	0.000118179	0.00421473	-0.17537
BEAN1	AT	36710	5.3	NA	NA	0	1	0.7865	0.1385	0.189683	0.759279	3.93109	0.000641942	0.0142206	-1.85706
CKLF-CMTM1	AT	36738	6	NA	NA	0	0.9756	1	0.1868	-0.217865	0.294883	-4.14505	0.00040365	0.0103054	-1.35993
RRAD	AA	36899	2.1	1	2.2	0	0.7679	0.4757	0.0615	-0.0675143	0.107539	-3.82388	0.0019499	0.0321813	-2.45872
KIAA0895L	ES	36959	2.1:2.2	1	3.1	0	0.9145	0.8382	0.1602	-0.213472	0.728646	-3.72598	0.00159528	0.0277557	-2.50184
LRRC29	AP	36979	1	NA	NA	0	0.9564	0.8619	0.1976	-0.28043	0.386264	-3.73339	0.00134677	0.0247083	-2.42926
LRRC29	AP	36981	2	NA	NA	0	0.9564	1	0.1934	0.262395	0.464077	4.31212	0.000352482	0.00941303	-1.09275
LRRC36	AT	37014	15	NA	NA	0	1	0.9618	0.1824	-0.228254	0.675402	-5.03209	4.00511e-05	0.00194664	0.909701
LRRC36	AT	37015	10.2	NA	NA	0	1	0.9618	0.1824	0.22825	0.324596	5.03209	4.00509e-05	0.00194664	0.909706
NUTF2	AP	37145	2.1	NA	NA	0	0.9983	0.6413	0.0981	-0.163679	0.317544	-6.66177	7.44114e-07	8.88448e-05	4.94765
NUTF2	AP	37146	1	NA	NA	0	0.9983	0.6413	0.0981	0.163675	0.682454	6.66178	7.44109e-07	8.88448e-05	4.94766
SLC7A6	RI	37208	13.2	13.1	13.3	0	1	0.4843	0.0977	-0.0665125	0.906765	-3.68063	0.0011992	0.0228329	-2.47178
HAS3	AT	37253	6	NA	NA	0	1	0.58	0.0786	-0.056875	0.502287	-3.44979	0.00212009	0.0342221	-3.02848
HAS3	AT	37254	7	NA	NA	0	1	0.58	0.0786	0.056875	0.497713	3.44979	0.00212009	0.0342221	-3.02848
CHTF8	AA	37272	4.1:4.2	3	4.3	0	0.9808	0.7304	0.1193	-0.114322	0.203691	-4.2355	0.000322747	0.00893828	-1.13753
CHTF8	ES	37273	4.1	3	4.3	0	1	0.6494	0.0763	-0.0821167	0.824517	-4.44149	0.000177537	0.00573997	-0.58171
PDPR	AP	37327	3.1	NA	NA	0	1	0.5854	0.0988	-0.0867792	0.783044	-3.74713	0.00101645	0.0201537	-2.30953
MARVELD3	AT	37465	5	NA	NA	0	1	0.5703	0.0789	-0.0665625	0.601677	-4.18176	0.000341886	0.00928991	-1.23357
MARVELD3	AT	37467	4	NA	NA	0	1	0.4915	0.0756	0.0598417	0.390154	3.95837	0.000599504	0.0135848	-1.78954
GLG1	RI	37565	27.2	27.1	27.3	0	1	0.4606	0.0785	-0.0463667	0.924708	-3.38357	0.00249313	0.0383287	-3.18607
MAF	RI	37687	1.2	1.1	1.3	0	1	0.6032	0.0807	0.0875667	0.757017	4.1575	0.000363428	0.00959634	-1.29419
CMC2	AP	37703	1	NA	NA	0	1	0.4857	0.0704	0.057325	0.131029	3.45218	0.00210774	0.0341608	-3.02279
CMC2	ES	37737	4.4	2	5	0	0.9913	0.523	0.0549	-0.0457636	0.0579609	-3.45676	0.0022879	0.0359445	-3.03224
CENPN	AT	37739	12	NA	NA	0	1	0.7686	0.1411	-0.143338	0.583069	-5.49592	1.25731e-05	0.000816009	2.07781
CENPN	AT	37740	8	NA	NA	0	1	0.7734	0.1437	0.140579	0.40534	4.89604	5.63904e-05	0.00248634	0.565921
PKD1L2	AT	37758	18	NA	NA	0	0.9476	0.9499	0.2438	-0.300086	0.376285	-4.13551	0.000446759	0.0110094	-1.42012
KIAA0513	AT	37877	9.2	NA	NA	0	1	0.5865	0.1046	0.138429	0.178794	6.52447	1.03008e-06	0.000113841	4.61643
KIAA0513	AT	37878	14	NA	NA	0	1	0.5865	0.1046	-0.138433	0.821204	-6.52402	1.0312e-06	0.000113841	4.61534
EMC8	ES	37897	4	3	5	0	0.9983	0.3546	0.0586	0.0855	0.862704	4.5506	0.000134779	0.00463737	-0.306716
ZC3H18	ES	38002	4	3	5	0	0.9825	0.853	0.122	0.154913	0.346969	5.70135	7.56509e-06	0.000571126	2.59169
VPS9D1	AP	38130	2.1	NA	NA	0	0.9948	0.9841	0.1985	0.26943	0.428026	4.6734	0.00010923	0.00397956	-0.055172
VPS9D1	AP	38131	1	NA	NA	0	0.9948	0.9841	0.1985	-0.26943	0.571974	-4.6734	0.00010923	0.00397956	-0.055172
FANCA	AT	38142	10.4	NA	NA	0	1	0.545	0.0918	0.0936125	0.215035	3.53512	0.00171884	0.0293519	-2.82396
FANCA	AT	38143	43	NA	NA	0	1	0.545	0.0918	-0.0936125	0.784965	-3.53512	0.00171884	0.0293519	-2.82396
TUBB3	AP	38165	3	NA	NA	0	1	0.2625	0.0389	0.0374917	0.0397167	3.65464	0.00127908	0.0238304	-2.53498
TUBB3	AP	38166	5.1	NA	NA	0	1	0.797	0.1206	-0.172383	0.223738	-3.66886	0.00123474	0.0232792	-2.50041
TUBB3	AP	38167	4	NA	NA	0	1	0.956	0.2284	0.435108	0.425304	7.85527	4.87166e-08	1.18917e-05	7.73234
TUBB3	AP	38168	1	NA	NA	0	1	0.6957	0.1456	-0.3002	0.311233	-9.76657	9.14695e-10	5.43106e-07	11.8098
TUBB3	ES	38175	6.1:6.2	5.4	7.1	0	0.9459	0.997	0.1846	-0.413125	0.268978	-4.42481	0.000895325	0.0183227	-1.48874
DEF8	AT	38180	7.2	NA	NA	0	1	0.7792	0.1456	0.174254	0.398498	7.07262	2.85145e-07	4.19153e-05	5.92593
DEF8	AT	38182	14	NA	NA	0	1	0.7792	0.1456	-0.17425	0.601504	-7.07248	2.85236e-07	4.19153e-05	5.9256
DEF8	ES	38194	2.1	1	4	1	0.9756	0.7171	0.144	-0.200327	0.598352	-6.46492	1.81709e-06	0.00018218	4.14427
DBNDD1	AP	38196	3.1	NA	NA	0	1	0.6322	0.1404	-0.200004	0.805898	-6.22287	2.12071e-06	0.000205695	3.88187
DBNDD1	AP	38197	2	NA	NA	0	1	0.6092	0.1212	0.167679	0.137515	6.25138	1.97988e-06	0.000195928	3.95171
ABR	AP	38287	20	NA	NA	0	0.986	0.2463	0.0305	-0.0587333	0.0368333	-5.61136	9.44639e-06	0.000660916	2.36693
YWHAE	ES	38295	2:3:4:5:6	1	7	0	0.9983	0.4093	0.0651	-0.06565	0.921454	-4.58095	0.000124835	0.00437401	-0.230139
YWHAE	ES	38297	02:03:06	1	7	0	0.9354	0.9634	0.1194	-0.170024	0.288716	-3.84956	0.000955896	0.0192485	-2.13324
YWHAE	ES	38301	2	1	3	0	1	0.191	0.0312	-0.0574708	0.0882521	-7.42487	1.27454e-07	2.29512e-05	6.74852
MYO1C	AP	38307	1	NA	NA	0	0.9791	0.7361	0.1747	-0.147838	0.32516	-4.24962	0.00028813	0.00822603	-1.06371
TRPV3	AT	38442	20.2	NA	NA	0	1	0.915	0.1799	0.168492	0.202883	4.3723	0.000211423	0.00656965	-0.755779
TRPV3	AT	38443	19.2	NA	NA	0	1	0.915	0.1799	-0.168492	0.797117	-4.3723	0.000211423	0.00656965	-0.755779
P2RX5	AT	38486	13	NA	NA	0	0.9895	0.9535	0.1524	-0.253135	0.303857	-4.0647	0.000492276	0.0117808	-1.55693
P2RX5	AT	38487	12	NA	NA	0	0.9895	0.9535	0.1524	0.253135	0.696143	4.0647	0.000492276	0.0117808	-1.55693
ITGAE	ES	38490	28	27	29	1	0.9895	0.8541	0.1878	-0.250783	0.623529	-6.47461	1.15986e-06	0.000126504	4.49563
CYB5D2	AD	38523	1.2	1.1	2	0	0.8429	1	0.2233	0.246067	0.640517	4.92189	0.000116791	0.00417202	0.133603
MINK1	ES	38598	19	18	20	0	0.993	0.2737	0.0478	0.0866455	0.915807	9.36544	4.61878e-09	1.91453e-06	10.2776
RNF167	ES	38607	07:08:00	6	9	0	1	0.0757	0.0126	-0.00944583	0.985073	-3.55061	0.00165444	0.028568	-2.78668
CAMTA2	AP	38627	2	NA	NA	0	0.9511	0.6955	0.0964	0.107467	0.128802	3.45049	0.00244505	0.0377479	-3.05871
CAMTA2	AP	38629	1	NA	NA	0	0.9511	0.6955	0.0964	-0.107467	0.871198	-3.45049	0.00244505	0.0377479	-3.05871
SLC52A1	AP	38647	1	NA	NA	0	1	0.7575	0.124	-0.118583	0.420954	-3.5789	0.00154283	0.0271808	-2.71844
SLC52A1	AP	38648	2	NA	NA	0	1	0.7575	0.124	0.118583	0.579046	3.5789	0.00154283	0.0271808	-2.71844
SCIMP	AT	38666	5	NA	NA	0	1	0.6685	0.1281	0.0964542	0.253781	3.31024	0.00298071	0.0433393	-3.35931
SCIMP	AT	38667	6	NA	NA	0	1	0.6685	0.1281	-0.0964542	0.746219	-3.31024	0.00298071	0.0433393	-3.35931
RPAIN	ES	38691	00:05:06.100000	3	7	0	0.993	0.8407	0.1624	0.180314	0.407087	3.88018	0.000889093	0.0182376	-2.06143
GABARAP	AD	38867	1.2:1.3:1.4:1.5	1.1	2.1	0	1	0.7949	0.1698	0.202967	0.575729	3.97909	0.000569146	0.0131686	-1.73821
EIF5A	AP	38906	1	NA	NA	0	1	0.1919	0.0303	-0.0521917	0.0645792	-6.66985	7.3006e-07	8.78647e-05	4.96708
EIF5A	AP	38907	2	NA	NA	0	1	0.4686	0.0698	-0.063775	0.775171	-3.54842	0.00166342	0.0286743	-2.79196
EIF5A	AP	38908	3	NA	NA	0	1	0.4844	0.0737	0.108567	0.152213	6.26311	1.92477e-06	0.000190905	3.98041
GPS2	RI	38915	1.2	1.1	1.3	0	0.9197	0.4952	0.0628	0.06732	0.0688591	5.47297	2.50245e-05	0.00138725	1.58291
TMEM256-PLSCR3	ES	38937	8	7	9.1	0	0.9948	0.5901	0.0957	-0.0677875	0.881765	-3.69356	0.00116129	0.0222872	-2.44028
CHRNB1	AP	38958	11.1	NA	NA	0	0.9721	0.7711	0.1857	-0.317877	0.817452	-7.97109	7.10515e-08	1.51547e-05	7.46571
CHRNB1	AP	38959	3	NA	NA	0	0.9721	0.7578	0.1075	0.142977	0.0774261	6.0987	4.17685e-06	0.000351575	3.29512
CHRNB1	AP	38960	1	NA	NA	0	0.9721	0.6561	0.1401	0.174909	0.105126	4.83926	8.13908e-05	0.00327211	0.285028
TNFSF13	AP	38969	1	NA	NA	0	1	0.5923	0.1029	0.120217	0.144133	4.84136	6.47171e-05	0.00276072	0.427706
TNFSF13	AP	38970	2.1	NA	NA	0	1	0.5923	0.1029	-0.120217	0.855867	-4.84136	6.47171e-05	0.00276072	0.427706
CD68	AA	38994	2.1	1	2.2	0	1	0.144	0.0163	0.010425	0.957575	3.30439	0.00302341	0.0436602	-3.37309
MPDU1	AT	38996	1.2	NA	NA	0	1	0.0825	0.0124	-0.0142375	0.0312729	-3.93802	0.000630883	0.0140638	-1.83991
LSMD1	RI	39063	5.2	5.1	5.3	0	0.9913	0.5303	0.0772	-0.0684391	0.227245	-4.31576	0.000264617	0.0076542	-0.939759
CHD3	AP	39067	2	NA	NA	0	0.8551	1	0.1288	0.113489	0.0787293	3.41669	0.00296012	0.0431421	-3.16171
CHD3	AP	39068	1	NA	NA	0	0.8551	1	0.1288	-0.113489	0.921271	-3.41669	0.00296012	0.0431421	-3.16171
CNTROB	AD	39080	17.2	17.1	18.2	0	0.9773	0.4167	0.0825	0.0641	0.0747136	3.41045	0.00283277	0.0418514	-3.16208
RPL26	AD	39180	1.2:1.3	1.1	2.2	0	1	0.0421	0.0055	0.004325	0.00555833	3.75983	0.000984786	0.0197038	-2.27844
MYH10	ES	39199	6.1	5	7	0	0.829	0.8242	0.1765	0.1278	0.113498	4.30056	0.000299465	0.00847258	-1.0214
GAS7	AP	39260	1	NA	NA	0	0.8604	1	0.2087	0.284133	0.389911	5.21934	3.78649e-05	0.00186504	1.10738
GAS7	AP	39261	4	NA	NA	0	0.8604	0.9421	0.1807	-0.286695	0.414331	-8.37545	4.51452e-08	1.12512e-05	7.99913
PMP22	AP	39340	2	NA	NA	0	0.9965	0.8409	0.1344	0.159758	0.700854	6.28233	1.83779e-06	0.000183104	4.02742
PMP22	AP	39341	1	NA	NA	0	0.9965	0.8409	0.1344	-0.159758	0.299146	-6.28233	1.83779e-06	0.000183104	4.02742
TVP23C	AT	39354	9.2	NA	NA	0	1	0.4417	0.0692	-0.0533792	0.167206	-3.32225	0.00289499	0.0424424	-3.33104
MPRIP	AT	39454	25	NA	NA	0	1	0.6257	0.0776	-0.0605333	0.942921	-3.50091	0.00186995	0.0311782	-2.90616
MPRIP	AT	39456	2	NA	NA	0	1	0.6257	0.0776	0.0605333	0.0570792	3.50091	0.00186995	0.0311782	-2.90616
MPRIP	ES	39458	20	19	21	1	0.9564	0.3258	0.0404	0.0242174	0.900643	3.24527	0.00362322	0.0493634	-3.5151
FLCN	AT	39460	8.2	NA	NA	0	1	0.3289	0.0446	0.0368292	0.0908521	4.31005	0.000247394	0.00728749	-0.912168
FLCN	AT	39461	14	NA	NA	0	1	0.3289	0.0446	-0.0368292	0.909148	-4.31005	0.000247394	0.00728749	-0.912168
COPS3	AA	39470	6.1	5	6.2	0	1	0.2607	0.0327	-0.0312208	0.0857396	-3.51182	0.00182038	0.0304817	-2.87997
SREBF1	ES	39505	8	7	9	0	0.9878	0.489	0.0602	0.0423227	0.0403543	7.14514	4.0499e-07	5.54345e-05	5.67997
SREBF1	ES	39507	2	1	3.2	0	0.9791	0.8008	0.1575	-0.0886273	0.405557	-3.33235	0.00307286	0.0440651	-3.31995
ATPAF2	AT	39533	12	NA	NA	0	1	0.2073	0.0388	-0.0495708	0.0658312	-4.10011	0.000419915	0.010543	-1.43739
TRIM16L	AP	39629	1.1	NA	NA	0	0.8656	0.9784	0.3012	-0.328521	0.679937	-3.75346	0.00223646	0.0354642	-2.59765
TRIM16L	AP	39631	6.1	NA	NA	0	0.8656	0.9784	0.3012	0.328521	0.320061	3.75346	0.00223646	0.0354642	-2.59765
B9D1	AT	39709	7	NA	NA	0	1	0.4053	0.0644	0.0846792	0.122031	4.19251	0.000332751	0.00912066	-1.20669
MAPK7	AD	39723	2.2	2.1	3	0	0.8325	0.7636	0.1631	-0.113144	0.63347	-3.50569	0.00302179	0.0436602	-3.02923
SLC47A1	ES	39739	16	15	17	0	0.7993	0.4803	0.1015	0.0899643	0.856384	3.68343	0.00256393	0.0390346	-2.73585
SPECC1	AT	39790	18	NA	NA	0	1	0.49	0.094	0.141863	0.407381	7.62192	8.18086e-08	1.64133e-05	7.20191
SPECC1	AT	39792	10	NA	NA	0	1	0.49	0.094	-0.141863	0.592619	-7.62192	8.18086e-08	1.64133e-05	7.20191
LGALS9	ES	39857	6	4	7	0	0.9878	0.4393	0.0697	-0.0576304	0.935623	-3.99497	0.000584683	0.0133773	-1.72739
IFT20	ES	39884	2.1:2.2	1	3	0	1	0.6261	0.1048	0.204504	0.61969	10.0624	5.1552e-10	3.28274e-07	12.399
RAB34	AP	39953	1	NA	NA	0	0.9913	0.6424	0.0853	-0.0981364	0.32972	-3.5671	0.00175856	0.029751	-2.77457
RAB34	AP	39954	2.1	NA	NA	0	0.9913	0.6424	0.0853	0.0981364	0.67028	3.5671	0.00175856	0.029751	-2.77457
FAM222B	AP	39979	4.1	NA	NA	0	0.9808	0.841	0.1311	0.124655	0.617652	4.67099	0.00012214	0.00431052	-0.123192
FAM222B	AP	39980	2.1	NA	NA	0	0.9808	0.841	0.13	-0.126627	0.381409	-4.82597	8.40366e-05	0.00335598	0.252821
MYO18A	ES	40038	41	40	42	0	0.993	0.825	0.1822	-0.356662	0.427115	-11.4299	4.16548e-11	5.43069e-08	14.9853
GOSR1	ES	40116	9	7.2	10.1	0	1	0.176	0.023	-0.0205208	0.97766	-4.26618	0.000276348	0.00793607	-1.02222
TMEM98	ES	40217	2	1	3	0	1	0.3644	0.0389	0.0541	0.903525	6.93771	3.89798e-07	5.36895e-05	5.60687
RFFL	ES	40233	11	10	12	0	0.993	0.3633	0.0554	-0.04695	0.961821	-4.21884	0.000311384	0.00872551	-1.14081
AP2B1	ES	40319	16	15	17	0	1	0.6388	0.1019	-0.185379	0.603931	-8.94664	4.74795e-09	1.94968e-06	10.1189
ACACA	AP	40505	2	NA	NA	0	1	0.8794	0.1557	-0.1537	0.712958	-4.61275	0.000115203	0.00412871	-0.149871
TADA2A	AP	40515	2	NA	NA	0	0.9424	1	0.1445	0.126595	0.230533	3.56065	0.00214108	0.0344532	-2.84241
TADA2A	AP	40516	1	NA	NA	0	0.9424	1	0.1445	-0.126595	0.769467	-3.56065	0.00214108	0.0344532	-2.84241
TADA2A	AT	40518	17.3	NA	NA	0	1	0.5639	0.0949	-0.0799208	0.921606	-3.93459	0.000636336	0.0141307	-1.8484
TADA2A	AT	40520	12.2	NA	NA	0	1	0.5639	0.0949	0.079925	0.0783958	3.93451	0.000636456	0.0141307	-1.84859
SYNRG	ES	40526	22	21	23	0	1	0.7209	0.1426	-0.139558	0.80005	-4.87412	5.95913e-05	0.0025924	0.510503
DDX52	ES	40542	3	2	5	0	0.9983	0.979	0.1223	-0.0881333	0.238108	-3.40574	0.00236167	0.0367838	-3.13344
PCGF2	ES	40590	3.2	2.2	5	1	0.8848	0.7549	0.1484	-0.204128	0.37371	-4.61611	0.000225986	0.0067852	-0.536877
FBXL20	AT	40641	16.2	NA	NA	0	1	0.5137	0.0932	0.103413	0.671665	4.78287	7.49971e-05	0.00310577	0.279871
FBXL20	AT	40642	17	NA	NA	0	1	0.5137	0.0932	-0.103413	0.328335	-4.78287	7.49971e-05	0.00310577	0.279871
PGAP3	ES	40670	4:5:6:7	3	8	0	1	0.2383	0.0256	-0.0199208	0.984865	-3.62273	0.00138433	0.0252592	-2.61241
ERBB2	AD	40685	8.2	8.1	9	0	0.9843	0.2256	0.0332	-0.0404542	0.0563688	-4.67063	9.95436e-05	0.00374786	-0.00372311
GRB7	AP	40691	1	NA	NA	0	0.9913	0.9677	0.1162	-0.103971	0.533602	-3.46242	0.00205542	0.0334733	-2.99831
MED24	ES	40831	7	6	8	0	0.9791	0.7488	0.1356	0.124963	0.22029	4.49261	0.000156034	0.00518989	-0.452927
MED24	ES	40834	4	3	5	0	0.9948	0.2362	0.02	-0.0139	0.991554	-3.47543	0.00199082	0.0327	-2.96721
MSL1	AT	40842	3.2	NA	NA	0	1	0.6673	0.1053	-0.102833	0.57935	-5.22648	2.46039e-05	0.00137363	1.40025
MSL1	AT	40843	9	NA	NA	0	1	0.6673	0.1053	0.102833	0.42065	5.22648	2.46039e-05	0.00137363	1.40025
RARA	AP	40858	5	NA	NA	0	0.9983	0.6065	0.1064	-0.108254	0.47281	-3.6871	0.00118009	0.0225537	-2.45603
RARA	AP	40859	1	NA	NA	0	0.9983	0.5099	0.0729	0.082325	0.0769167	5.21678	2.52082e-05	0.00138797	1.3758
NT5C3B	ES	40954	3	2	4	0	0.9965	0.6387	0.1007	-0.101457	0.241496	-3.86805	0.000799176	0.0168171	-2.03635
STAT5A	ES	41033	5	4	6	0	0.9651	0.3024	0.0545	-0.0450739	0.936447	-3.33089	0.00295222	0.043066	-3.31652
ATP6V0A1	ES	41044	22	21.2	23	1	0.7923	0.245	0.0372	0.0469824	0.91062	3.49181	0.00287412	0.0422494	-3.0348
COASY	RI	41068	1.2:1.3:1.4	1.1	1.5	0	1	0.5389	0.0791	0.127108	0.852579	7.72738	6.4665e-08	1.472e-05	7.4425
FAM134C	ES	41089	6	5	7	0	0.986	0.2694	0.0363	0.0321208	0.946277	3.33048	0.00283763	0.0418529	-3.31165
RPL27	AP	41172	3.1	NA	NA	0	1	0.3752	0.0247	0.00784167	0.00649583	5.20492	2.59675e-05	0.00140686	1.34589
IFI35	AD	41177	4.2	4.1	5	0	0.9895	0.5388	0.0679	0.0945773	0.523778	8.05703	5.95952e-08	1.37094e-05	7.64636
CD300LG	AT	41723	7	NA	NA	0	0.9983	0.1965	0.0196	-0.0167783	0.019017	-3.26896	0.00342407	0.0474595	-3.46035
CD300LG	AT	41724	2.2	NA	NA	0	0.9983	0.157	0.022	-0.0157696	0.0163617	-3.72508	0.00113489	0.0219695	-2.38191
CD300LG	AT	41725	8	NA	NA	0	0.9983	0.1609	0.0328	-0.0458478	0.0421298	-5.26477	2.55343e-05	0.00140241	1.40772
CD300LG	AT	41726	9	NA	NA	0	0.9983	0.2351	0.0528	0.0784087	0.922494	6.2074	2.66489e-06	0.000247547	3.69984
G6PC3	AD	41771	1.2	1.1	3	0	0.9948	0.3893	0.0514	0.0388391	0.116487	4.50007	0.00016769	0.00548212	-0.48437
TMUB2	ES	41789	4.7:4.8	4.5	5	0	0.8935	1	0.2206	-0.22148	0.7412	-3.53082	0.00313414	0.044609	-3.0052
TMUB2	ES	41790	4.8	4.5	5	0	0.904	1	0.2255	-0.233711	0.708757	-3.44949	0.00293373	0.0428816	-3.10599
TMUB2	RI	41792	4.6:4.7	4.5	4.8	0	0.9983	0.2722	0.0431	0.0375042	0.930256	3.40371	0.0023734	0.0369533	-3.13825
UBTF	AP	41830	5.1	NA	NA	0	0.9913	0.9038	0.106	0.131042	0.117371	3.52796	0.00174947	0.0297026	-2.8412
UBTF	ES	41833	11	10	12	0	1	0.6891	0.0768	0.0820042	0.469935	5.02757	4.05089e-05	0.00196637	0.898272
C17orf104	AT	41878	8	NA	NA	0	1	0.9786	0.2207	0.186217	0.441471	3.38831	0.00246442	0.0379803	-3.17482
C17orf104	AT	41879	6.2	NA	NA	0	1	0.9786	0.2207	-0.186217	0.558529	-3.38831	0.00246442	0.0379803	-3.17482
HIGD1B	AP	41896	1	NA	NA	0	0.911	0.8797	0.2627	-0.483529	0.534429	-9.02856	1.3187e-08	4.30011e-06	9.26757
HIGD1B	AP	41897	2.1	NA	NA	0	0.911	0.8797	0.2627	0.483524	0.465573	9.02811	1.31979e-08	4.30011e-06	9.26672
ACBD4	AT	41941	12	NA	NA	0	1	0.7453	0.122	-0.147904	0.548706	-3.91309	0.000671545	0.014655	-1.90153
ACBD4	AT	41942	11	NA	NA	0	1	0.7453	0.1219	0.1479	0.451296	3.91291	0.00067185	0.014655	-1.90198
PLEKHM1	ES	41977	4.1	3	5	0	1	0.2944	0.0399	0.0360875	0.944477	3.89709	0.000698987	0.0150771	-1.94103
KANSL1	AP	42010	1	NA	NA	0	0.9773	0.7074	0.1246	0.136496	0.651923	4.24758	0.000289616	0.00825235	-1.06882
KANSL1	AP	42011	2	NA	NA	0	0.9773	0.6065	0.1131	-0.112825	0.277842	-3.71676	0.00109624	0.0214264	-2.38373
GOSR2	AT	42040	5.2	NA	NA	0	1	0.1901	0.0297	0.0287458	0.0749771	3.94392	0.000621621	0.0139138	-1.82531
GOSR2	AT	42043	4.2	NA	NA	0	1	0.1606	0.0219	0.0155792	0.0357604	3.29138	0.00312045	0.044544	-3.40367
GOSR2	ES	42045	5.1	4.1	6.1	0	1	0.254	0.0318	0.0394958	0.94246	4.2938	0.000257747	0.00752985	-0.952944
PNPO	ES	42134	4	3	5	0	1	0.3812	0.0494	-0.0490458	0.96666	-4.51496	0.000147471	0.00497283	-0.39659
NFE2L1	AP	42157	1	NA	NA	0	0.9965	0.7241	0.1411	0.113508	0.56165	3.46833	0.00202582	0.0331633	-2.98419
NFE2L1	AP	42158	2	NA	NA	0	0.9965	0.7278	0.1399	-0.125638	0.430527	-3.9389	0.00062949	0.0140431	-1.83772
ATP5G1	AD	42240	1.2	1.1	2	0	0.9948	0.3523	0.049	0.0450391	0.0384447	4.24573	0.000314682	0.00877411	-1.11235
SPATA20	ES	42427	5	4.2	6	0	0.9773	1	0.1014	0.0554522	0.0997174	3.27653	0.00336265	0.0469146	-3.44281
SPAG9	ES	42494	30	29	31	0	0.9983	0.8393	0.1562	-0.274721	0.414923	-9.51911	1.4901e-09	8.11392e-07	11.3086
NME1-NME2	AP	42506	1	NA	NA	0	0.9983	0.5214	0.0717	0.0878958	0.236223	5.06188	3.71644e-05	0.00183888	0.984942
NME1-NME2	AP	42507	8.1	NA	NA	0	0.9983	0.6971	0.0749	-0.133971	0.723956	-5.08951	3.4675e-05	0.0017492	1.0547
NME1-NME2	ES	42513	2	1	3	0	0.9913	0.4735	0.0341	0.0290364	0.0483826	3.27916	0.00348369	0.048	-3.44195
HLF	AP	42576	1	NA	NA	0	0.8325	0.535	0.1031	0.0985105	0.894084	5.01065	8.23182e-05	0.0033031	0.429392
HLF	AP	42579	4.1	NA	NA	0	0.8325	0.4625	0.0738	-0.0586684	0.0608465	-3.72129	0.00148981	0.0265124	-2.48327
DGKE	AT	42595	2.2	NA	NA	0	1	0.3956	0.0674	0.05835	0.121996	3.67272	0.00122296	0.0231215	-2.49101
DGKE	AT	42596	12	NA	NA	0	1	0.3956	0.0674	-0.05835	0.878004	-3.67272	0.00122296	0.0231215	-2.49101
MSI2	AT	42616	16	NA	NA	0	1	0.4458	0.0662	0.0382542	0.0919604	3.95471	0.000605024	0.0136817	-1.79859
MSI2	AT	42617	20	NA	NA	0	1	0.4486	0.0705	-0.0550958	0.896627	-4.10821	0.000411438	0.0104049	-1.41718
PTRH2	RI	42791	2.3	2.2	2.4	0	0.9668	0.9873	0.1678	-0.244643	0.35742	-3.50788	0.00213774	0.0344532	-2.92703
BCAS3	AP	42864	1	NA	NA	0	0.9948	0.7316	0.1585	-0.326796	0.342056	-7.76561	5.94018e-08	1.37094e-05	7.52937
BCAS3	AP	42865	12.1	NA	NA	0	0.9948	0.7316	0.1585	0.326796	0.657944	7.76561	5.94018e-08	1.37094e-05	7.52937
BRIP1	AT	42892	19.2	NA	NA	0	1	0.4543	0.0797	-0.122162	0.246865	-5.72249	7.18126e-06	0.000547796	2.64441
BRIP1	AT	42893	20	NA	NA	0	1	0.4543	0.0797	0.122162	0.753135	5.72249	7.18126e-06	0.000547796	2.64441
CYB561	AP	42921	2	NA	NA	0	0.993	0.6734	0.1006	0.105538	0.186194	5.85895	5.13636e-06	0.000413336	2.98396
CYB561	AP	42925	1	NA	NA	0	0.993	0.9343	0.1221	-0.1633	0.723575	-3.51043	0.00182664	0.0305748	-2.88331
CYB561	AA	42929	10.1	9	10.2	0	1	0.2089	0.0261	-0.0173708	0.984402	-3.79967	0.000891675	0.018265	-2.1808
STRADA	RI	42963	12.3:12.4	12.2	12.5	0	0.993	0.7054	0.1344	0.160483	0.721467	3.24192	0.00351751	0.048306	-3.51949
DDX42	ES	42993	2	1.3	3	0	0.9825	0.6641	0.1056	0.0960125	0.254269	4.34493	0.000226547	0.00679455	-0.82457
CEP112	AP	43096	2	NA	NA	0	0.8848	0.9476	0.1717	-0.220771	0.531107	-3.72785	0.00127435	0.0237659	-2.4177
BPTF	ES	43117	05:06:00	4	7	0	0.8813	1	0.209	-0.2146	0.601678	-3.53959	0.00187801	0.0312323	-2.839
AMZ2	ES	43129	06:07:00	5	8	0	1	0.2519	0.0424	0.0695875	0.878969	7.21266	2.06629e-07	3.35013e-05	6.25481
PRKAR1A	AP	43141	1	NA	NA	0	1	0.7472	0.1354	-0.205475	0.341037	-6.7567	5.95084e-07	7.67694e-05	5.17542
ABCA9	AT	43157	39	NA	NA	0	1	0.5063	0.0888	-0.094475	0.847163	-3.57525	0.0015568	0.0272739	-2.72725
ABCA9	AT	43158	6.2	NA	NA	0	1	0.5063	0.0888	0.094475	0.152837	3.57525	0.0015568	0.0272739	-2.72725
RPL38	RI	43231	1.3	1.2	1.4	0	1	0.0339	0.0049	0.004125	0.00740417	4.18781	0.000336709	0.00919474	-1.21843
RPL38	RI	43232	1.2:1.3	1.1	1.4	0	0.9983	0.1768	0.0281	0.0312522	0.0467	4.19972	0.000352614	0.00941303	-1.22558
SLC16A5	AP	43347	2	NA	NA	0	0.9773	0.6984	0.1273	-0.118504	0.333527	-3.51218	0.0018188	0.0304817	-2.87912
NT5C	AD	43362	3.3	3.2	4.1	0	0.9965	0.749	0.1124	0.111425	0.239225	3.451	0.00211384	0.0342007	-3.0256
SUMO2	AP	43379	1	NA	NA	0	1	0.087	0.0104	-0.00824167	0.982933	-3.55436	0.00163918	0.028333	-2.77763
SUMO2	AP	43380	2	NA	NA	0	1	0.087	0.0104	0.00824167	0.0170667	3.55436	0.00163918	0.028333	-2.77763
MIF4GD	ES	43417	5	4	6.1	0	1	0.2912	0.0349	-0.0259042	0.97609	-3.68039	0.0011999	0.0228329	-2.47235
GRB2	AP	43438	3.1	NA	NA	0	0.993	0.7433	0.1024	0.10345	0.140767	3.35738	0.00265767	0.0399533	-3.24811
GRB2	AP	43439	1	NA	NA	0	0.993	1	0.1216	-0.161862	0.825702	-3.46671	0.00203388	0.0332087	-2.98806
CASKIN2	AP	43450	1	NA	NA	0	0.904	0.7925	0.076	0.130922	0.894305	8.03068	2.70011e-07	4.02161e-05	6.38025
CASKIN2	AP	43451	3	NA	NA	0	0.904	0.7925	0.076	-0.130922	0.105695	-8.03068	2.70011e-07	4.02161e-05	6.38025
LLGL2	ES	43463	26	25	27	0	0.9895	0.6139	0.0692	-0.066913	0.796219	-4.08497	0.000468239	0.0113809	-1.50728
SMIM5	AP	43470	1	NA	NA	0	1	0.8929	0.1387	-0.194746	0.588202	-6.05598	3.1762e-06	0.00028588	3.47157
SMIM5	AP	43471	2.1	NA	NA	0	1	0.8929	0.1387	0.194746	0.411798	6.05598	3.1762e-06	0.00028588	3.47157
SAP30BP	ES	43478	12	11	13	0	1	0.3956	0.058	-0.0476042	0.0908188	-3.55054	0.00165473	0.028568	-2.78685
SAP30BP	ES	43482	4	3	6	0	1	0.1204	0.0193	-0.0141542	0.982881	-4.36005	0.000218066	0.00666299	-0.786586
ITGB4	ES	43489	35	34	36	0	0.986	0.8912	0.163	-0.369795	0.312222	-7.91377	7.99376e-08	1.63363e-05	7.34466
GALK1	AT	43493	8	NA	NA	0	0.9965	0.8941	0.1519	0.1953	0.192477	4.91446	6.02685e-05	0.0025987	0.542029
GALK1	AT	43494	7.2	NA	NA	0	0.9965	0.8941	0.1519	-0.1953	0.807523	-4.91446	6.02685e-05	0.0025987	0.542029
UNK	ES	43510	3	2	4	0	0.9983	0.1927	0.0386	0.0432333	0.95	4.23582	0.000298333	0.00845141	-1.09828
EXOC7	ES	43572	8.2	6	9	0	0.9983	0.8883	0.1616	0.128822	0.276651	3.92745	0.000690525	0.0149544	-1.892
2020-09-09	AP	43715	8	NA	NA	0	1	0.5376	0.0821	-0.128496	0.141381	-6.96934	3.62169e-07	5.05174e-05	5.68189
2020-09-09	AP	43726	3.1	NA	NA	0	1	0.7474	0.1505	0.149058	0.104725	5.66335	8.30825e-06	0.00061147	2.49684
SYNGR2	RI	43774	4.2	4.1	4.3	0	1	0.1832	0.0198	0.0103333	0.0200292	3.66832	0.0012364	0.0232855	-2.50173
SYNGR2	ES	43776	4.1	3.2	4.3	0	1	0.2004	0.0317	-0.0343625	0.944781	-6.74099	6.17465e-07	7.86383e-05	5.13779
AFMID	ES	43794	9:10:11.1:11.2	8	12	1	0.9058	0.8567	0.1973	-0.242459	0.378277	-4.69615	0.000220343	0.00669996	-0.449304
AFMID	ES	43795	00:10:11.100000	8	12	1	0.9267	0.9324	0.2021	-0.342688	0.522483	-6.30541	8.78583e-06	0.000627779	2.85762
AFMID	ES	43800	7	6	8	1	0.9389	0.836	0.1477	-0.177647	0.654105	-3.44005	0.00321182	0.0454999	-3.14492
AFMID	ES	43801	7:8:9:10:11.1:11.2	6	12	0	0.993	0.7348	0.1302	-0.093387	0.156055	-3.37926	0.00262829	0.0396299	-3.20355
AFMID	ES	43804	7:8:9:10:11.1	6	12	0	0.9965	0.8634	0.1781	-0.174279	0.27501	-4.16075	0.000360466	0.00953531	-1.28607
AFMID	ES	43807	7:8:9:10	6	12	0	0.9825	0.7036	0.0711	-0.0582174	0.0715596	-3.34767	0.00283569	0.0418529	-3.2774
AFMID	ES	43811	8	6	12	1	0.897	0.9601	0.1456	0.191329	0.234953	4.39693	0.000648456	0.0143103	-1.33551
CANT1	ES	43978	2	1	3.1	0	0.9878	1	0.1633	0.137917	0.170471	3.5844	0.00152202	0.0269497	-2.70516
CCDC40	AT	44018	12	NA	NA	0	1	0.5635	0.0918	0.108158	0.131779	3.88193	0.00072601	0.0154852	-1.97843
CARD14	AT	44026	17.2	NA	NA	0	0.9965	0.8199	0.1798	-0.139282	0.288887	-3.3242	0.0031326	0.0446089	-3.33869
CARD14	AT	44027	23	NA	NA	0	0.9965	0.8199	0.1798	0.139282	0.711113	3.3242	0.0031326	0.0446089	-3.33869
ENDOV	AT	44054	13	NA	NA	0	1	0.7911	0.1549	-0.134542	0.4648	-3.54573	0.00167448	0.0288071	-2.79843
ENDOV	RI	44059	12.2	12.1	12.3	0	0.9808	0.6	0.1147	0.142129	0.716711	4.54266	0.000185035	0.00592139	-0.494022
ENDOV	ES	44066	5	2.4	6.2	0	0.9546	0.8512	0.1781	-0.17381	0.447747	-4.13484	0.000486245	0.0116747	-1.46126
BAIAP2	AT	44092	16.3	NA	NA	0	1	0.4569	0.0518	-0.0393083	0.172437	-3.25979	0.00336872	0.0469441	-3.47772
BAIAP2	AD	44094	17.2	17.1	18.1	0	0.9843	0.3632	0.0477	0.0622652	0.852547	4.06168	0.000495956	0.0118624	-1.56432
AATK	RI	44105	12.4	12.3	12.5	0	0.904	0.3803	0.0618	0.0447	0.949739	3.81682	0.00111039	0.0216259	-2.23794
ENTHD2	ES	44111	8	7	9	0	0.986	0.4629	0.0724	-0.0643455	0.940322	-3.5257	0.00194134	0.0320913	-2.8715
C17orf70	AD	44129	2.2	2.1	3	0	0.9825	0.7634	0.1248	0.121023	0.463007	4.13045	0.000452273	0.011112	-1.43233
ARHGDIA	RI	44192	7.2:7.3	7.1	7.4	0	1	0.1139	0.0105	0.0143708	0.979548	4.33029	0.000235075	0.00700252	-0.861347
ANAPC11	AP	44202	4	NA	NA	0	0.9983	0.1233	0.0127	0.00895417	0.0121312	4.65412	0.000103779	0.00386756	-0.0454206
ANAPC11	ES	44209	05:06:00	3.3	7.2	0	0.9808	0.2991	0.0474	0.0453238	0.0564778	4.07873	0.000555451	0.0129472	-1.59389
ANAPC11	ES	44215	3.3:5:6	3.2	7.2	0	0.9791	0.3644	0.0571	0.0567095	0.0692889	4.48159	0.000213783	0.00658414	-0.639041
ANAPC11	ES	44216	3.3:3.4:6	3.2	7.2	0	0.9895	0.7589	0.0996	0.0984818	0.432943	4.2443	0.000343224	0.00931108	-1.15748
ANAPC11	ES	44221	3.3:5	3.2	6	0	0.986	0.2098	0.0371	0.0373952	0.0475956	3.52971	0.00203114	0.0331887	-2.87682
STRA13	AD	44264	3.2	3.1	4.1	0	0.9895	0.8911	0.0884	0.0848818	0.109102	5.90539	6.52262e-06	0.000507633	2.84121
STRA13	ES	44266	3.1	2	4.1	0	0.986	0.7808	0.1531	-0.265091	0.669191	-9.89407	1.7479e-09	8.82862e-07	11.2786
GPS1	ES	44284	1.3:1.4:1.5:1.6	1.1	2.3	0	0.9913	0.4071	0.0449	0.0299	0.0533468	3.3514	0.00281043	0.0416294	-3.2687
GPS1	ES	44286	1.5:1.6	1.1	2.3	0	0.9895	0.3234	0.0494	0.0352043	0.0752979	3.94536	0.000660723	0.0145227	-1.84838
C17orf62	ES	44346	5.2	4.3	6	0	0.9983	0.1875	0.0265	-0.0317783	0.965511	-3.77551	0.00100301	0.0199611	-2.26034
NARF	AP	44391	1	NA	NA	0	0.9983	0.3852	0.0704	-0.147683	0.163783	-8.11939	2.73314e-08	7.698e-06	8.32421
NARF	AP	44392	2	NA	NA	0	0.9983	0.3852	0.0704	0.147687	0.836215	8.12045	2.72681e-08	7.698e-06	8.32658
NARF	ES	44399	8	7	9	0	0.993	0.5715	0.0743	-0.0555182	0.0729957	-5.29577	2.7292e-05	0.00146238	1.38827
C18orf56	AT	44455	3	NA	NA	0	0.911	0.869	0.1904	-0.3121	0.352433	-4.73152	0.000346294	0.00933465	-0.690477
C18orf56	AT	44456	2	NA	NA	0	0.911	0.869	0.1904	0.312093	0.647569	4.73164	0.000346221	0.00933465	-0.690259
MYL12A	ES	44491	1.2:2	1.1	4	0	1	0.9875	0.1723	0.161725	0.352933	4.55418	0.000133567	0.00459928	-0.297696
TGIF1	AP	44498	4.1	NA	NA	0	1	0.5494	0.0997	-0.121292	0.287137	-4.57046	0.000128187	0.00445238	-0.256613
PTPRM	AP	44566	1	NA	NA	0	0.9442	0.9444	0.2577	-0.264971	0.806644	-4.65369	0.000103892	0.00386848	-0.0465066
PTPRM	AP	44567	7	NA	NA	0	0.9442	0.9444	0.2519	0.234675	0.170442	4.61909	0.000113376	0.00408322	-0.133888
ANKRD12	ES	44597	6	4	7	0	0.7574	1	0.1815	-0.262839	0.535559	-5.32824	4.92727e-05	0.00225132	1.01399
PPP4R1	AA	44612	4.1	2	4.2	0	0.9721	0.9536	0.116	0.137283	0.478711	4.97303	5.21809e-05	0.0023491	0.68703
PTPN2	ES	44724	07:08:00	6	9.1	0	0.7679	0.8327	0.1949	-0.129812	0.885027	-3.42205	0.00333824	0.0466185	-3.18315
RNMT	ES	44755	2.2	1	3.2	0	0.9476	0.9129	0.1265	0.134868	0.791035	3.70588	0.00126088	0.023625	-2.44756
ZNF519	AT	44757	4	NA	NA	0	1	0.7134	0.1344	0.0840417	0.205517	3.31612	0.00293846	0.0428938	-3.34548
RBBP8	AP	44784	1	NA	NA	0	0.9878	0.7959	0.126	-0.155438	0.82851	-5.56078	1.07057e-05	0.000719245	2.24035
RBBP8	AP	44787	2.1	NA	NA	0	0.9878	0.4975	0.0921	0.123858	0.118717	6.61462	8.31825e-07	9.54275e-05	4.83414
ANKRD29	AT	44841	11	NA	NA	0	0.9983	0.8374	0.1359	-0.102958	0.673063	-4.75983	7.94839e-05	0.00322174	0.221637
ANKRD29	AT	44842	3.2	NA	NA	0	0.9983	0.8374	0.1359	0.102962	0.326935	4.75994	7.94619e-05	0.00322174	0.221914
LAMA3	AP	44844	1	NA	NA	0	0.8133	1	0.3898	-0.598705	0.679689	-7.37079	2.49465e-07	3.81916e-05	6.17663
LAMA3	AP	44845	40	NA	NA	0	0.8133	1	0.3898	0.598705	0.320311	7.37079	2.49465e-07	3.81916e-05	6.17663
TTC39C	AT	44853	4	NA	NA	0	1	0.6671	0.1135	-0.0858708	0.500165	-3.25358	0.0034197	0.0474439	-3.49224
TTC39C	AT	44854	18	NA	NA	0	1	0.6671	0.1135	0.085875	0.499837	3.25392	0.00341692	0.0474203	-3.49146
SS18	AP	44905	2	NA	NA	0	0.993	0.624	0.0982	-0.111217	0.883813	-4.69293	9.40974e-05	0.00362986	0.0525942
SS18	AP	44906	1	NA	NA	0	0.993	0.624	0.0982	0.111221	0.11619	4.69304	9.4071e-05	0.00362986	0.0528751
DTNA	AT	45094	18	NA	NA	0	1	0.8171	0.1427	0.120867	0.2283	4.76521	7.84116e-05	0.00319851	0.235248
DTNA	AT	45097	32.2	NA	NA	0	1	0.8587	0.1472	-0.144642	0.682396	-4.94178	5.02586e-05	0.00228836	0.681523
DTNA	ES	45099	00:31:32.100000	30	32.2	0	0.993	0.7992	0.1713	0.184842	0.839862	3.7279	0.00106626	0.020943	-2.35651
MAPRE2	AP	45133	1	NA	NA	0	0.993	0.402	0.0838	0.0803292	0.0598354	4.35155	0.000222796	0.00675317	-0.807952
MAPRE2	AP	45135	4.1	NA	NA	0	0.993	0.6074	0.1144	-0.127071	0.91231	-5.06243	3.71136e-05	0.00183844	0.986317
ZNF396	AT	45167	5	NA	NA	0	1	0.3591	0.0638	-0.0642958	0.26466	-4.70831	9.05144e-05	0.00353828	0.0914626
TPGS2	AT	45263	11	NA	NA	0	1	0.5476	0.081	-0.0789792	0.321806	-5.84235	5.3496e-06	0.000426717	2.94273
TPGS2	AT	45264	10	NA	NA	0	1	0.5648	0.0845	0.0718792	0.549452	3.87883	0.000731676	0.0155984	-1.98609
KIAA1328	AT	45281	19	NA	NA	0	1	0.0919	0.0106	-0.0125875	0.0120479	-5.4033	1.58277e-05	0.000963209	1.84528
KIAA1328	AT	45284	12	NA	NA	0	1	0.6598	0.105	0.167471	0.753527	8.51742	1.16412e-08	4.02435e-06	9.19892
KIAA1328	AT	45285	18.2	NA	NA	0	1	0.4243	0.0579	-0.0792292	0.137406	-6.74985	6.04742e-07	7.76156e-05	5.15901
KIAA1328	AT	45286	17.3	NA	NA	0	1	0.0805	0.011	-0.00944167	0.0109625	-3.6088	0.0014329	0.0259125	-2.64615
KIAA1328	AT	45287	6.2	NA	NA	0	1	0.3696	0.0486	-0.0662125	0.0860646	-6.74704	6.0874e-07	7.77523e-05	5.15229
PIK3C3	AT	45316	21.3	NA	NA	0	1	0.559	0.0984	0.122317	0.244592	6.072	3.05501e-06	0.000280232	3.51106
PIK3C3	AT	45317	25	NA	NA	0	1	0.6965	0.1085	-0.157854	0.73516	-4.61018	0.000115953	0.00414882	-0.15636
C18orf25	ES	45391	3	2	4	0	0.9825	0.9773	0.1109	0.0768591	0.246502	3.26544	0.00359802	0.0491873	-3.47331
RNF165	AT	45394	8	NA	NA	0	0.9878	0.8969	0.2254	-0.208804	0.824853	-3.43425	0.00230206	0.0361089	-3.07449
RNF165	AT	45395	1.5	NA	NA	0	0.9878	0.8969	0.2254	0.208804	0.175147	3.43425	0.00230206	0.0361089	-3.07449
IER3IP1	AT	45442	3.2	NA	NA	0	1	0.1842	0.0293	0.0275458	0.91344	3.93524	0.000635288	0.014119	-1.84677
IER3IP1	AT	45443	6	NA	NA	0	1	0.1842	0.0293	-0.0275458	0.0865604	-3.93524	0.000635288	0.014119	-1.84677
RPL17	AP	45479	1	NA	NA	0	1	0.5874	0.0717	-0.0403958	0.827031	-3.96811	0.000585032	0.0133773	-1.76541
RPL17	AP	45481	2	NA	NA	0	1	0.5805	0.0717	0.0376958	0.171185	3.41169	0.00232755	0.0363813	-3.11929
MYO5B	ES	45496	30	29	31	0	0.9302	0.5346	0.0889	-0.123271	0.158262	-4.50569	0.000201939	0.00633319	-0.581825
MBD1	ES	45515	18.1	17	18.4	0	0.9948	0.9152	0.1161	0.0984417	0.669442	3.7944	0.00090347	0.0184464	-2.19373
MBD1	ES	45520	13.1:13.2	12	14	0	0.9878	0.5509	0.0926	-0.109378	0.830677	-4.65281	0.000114932	0.00412571	-0.106177
MBD1	ES	45521	13.2	12	14	0	0.801	0.8985	0.19	-0.28945	0.237879	-4.28031	0.0030084	0.043596	-2.24866
MBD2	AT	45575	8	NA	NA	0	1	0.2926	0.0378	-0.0350833	0.98	-3.33149	0.00283063	0.0418339	-3.30925
MBD2	AT	45576	3.2	NA	NA	0	1	0.2926	0.0378	0.0350833	0.02	3.33149	0.00283063	0.0418339	-3.30925
NEDD4L	ES	45672	4:8:9:10:11:12:13:14:15:16:17:18:19:20:21:22:23:24:26:27:28:29:30:31:32:33:34	1	35	0	0.9948	0.7074	0.0576	0.021525	0.985854	3.37023	0.00257568	0.0391345	-3.21769
SEC11C	ES	45685	5	4	6	0	1	0.1331	0.0159	0.0168917	0.967858	3.82945	0.000827805	0.0172945	-2.10767
SERPINB5	AT	45716	7	NA	NA	0	0.9948	0.9948	0.3363	0.402904	0.471883	5.53804	1.31475e-05	0.00084332	2.07909
SERPINB5	AT	45717	5.2	NA	NA	0	0.9948	0.9948	0.3363	-0.402904	0.528117	-5.53804	1.31475e-05	0.00084332	2.07909
CNDP2	AA	45816	2.2	1	2.3	0	0.9983	0.4948	0.0673	0.0424167	0.750567	3.73116	0.00105765	0.0208044	-2.34855
LINC00908	AT	45828	3	NA	NA	0	1	0.5074	0.0967	-0.136033	0.2468	-5.12073	3.20634e-05	0.00163741	1.13351
LINC00908	AT	45829	4	NA	NA	0	1	0.5701	0.1063	0.153596	0.734519	5.27651	2.17122e-05	0.00124218	1.5263
MBP	AP	45836	2	NA	NA	0	0.8935	0.8026	0.1515	0.162885	0.17252	3.88847	0.000940649	0.0190111	-2.07316
MBP	AP	45839	1	NA	NA	0	0.8935	0.8026	0.1515	-0.162885	0.82748	-3.88847	0.000940649	0.0190111	-2.07316
MBP	AT	45841	14.2	NA	NA	0	1	0.3523	0.0354	-0.0329875	0.0541312	-4.74378	8.27673e-05	0.00331507	0.181079
MBP	AT	45844	5.5	NA	NA	0	1	0.3523	0.0354	0.0329875	0.945869	4.74378	8.27673e-05	0.00331507	0.181079
ATP9B	AT	46230	5	NA	NA	0	1	0.6063	0.0964	0.11135	0.803108	5.95299	4.08139e-06	0.000347535	3.2171
ATP9B	AT	46232	31.3	NA	NA	0	1	0.6103	0.0966	-0.1123	0.196108	-5.90806	4.55475e-06	0.00037432	3.1058
PQLC1	ES	46259	06:09:00	5	10	0	0.9965	0.5696	0.0857	-0.0969261	0.794636	-4.35403	0.000240707	0.00713642	-0.845338
BSG	AP	46302	1	NA	NA	0	1	0.2297	0.0239	0.0244042	0.0188437	3.42239	0.00226738	0.035746	-3.09382
BSG	AP	46303	2	NA	NA	0	1	0.2297	0.0239	-0.0244	0.981158	-3.42201	0.00226947	0.0357661	-3.09472
PALM	ES	46315	8	7	9	0	0.9721	0.5396	0.0893	-0.0611217	0.950477	-3.80349	0.000936498	0.0189621	-2.19275
MED16	RI	46333	17.2	17.1	17.3	0	0.9948	0.1445	0.0224	0.0259565	0.977002	4.93376	5.74724e-05	0.00252522	0.589821
CNN2	ES	46363	5.2	4.2	6	0	1	0.1378	0.0233	-0.0177375	0.973469	-3.97713	0.000571941	0.0131985	-1.74305
HMHA1	AP	46370	1	NA	NA	0	1	0.5865	0.1175	-0.164625	0.198371	-5.99236	3.70788e-06	0.000323556	3.31448
ATP5D	RI	46401	4.2:4.3	4.1	4.4	0	0.9983	0.7773	0.1079	0.0979083	0.561733	4.02265	0.000510187	0.0121152	-1.63012
CIRBP	RI	46423	9.7	9.6	9.8	0	1	0.653	0.086	0.1207	0.801608	4.17938	0.000343936	0.00931108	-1.2395
CIRBP	AA	46437	8.2:8.3	7.5	8.4	0	0.9354	0.7522	0.1479	0.181945	0.731343	5.30784	3.62065e-05	0.00180944	1.20703
MUM1	ES	46457	5.1:5.2	4	6	0	0.9686	0.9097	0.1695	0.182519	0.255593	5.49802	1.99086e-05	0.00115554	1.75988
MUM1	ES	46458	5.1	4	6	0	0.9529	0.784	0.1467	0.146262	0.121627	4.90023	7.97107e-05	0.00322795	0.354271
MBD3	RI	46525	6.2	6.1	6.3	0	0.986	0.617	0.0668	0.0494455	0.0959022	3.40266	0.00260169	0.0394183	-3.15775
TCF3	AA	46538	19.3	19.1	19.4	0	1	0.7395	0.126	0.126096	0.73334	3.59209	0.00149335	0.0265539	-2.68657
TCF3	RI	46539	19.2	19.1	19.3	0	1	0.4529	0.0674	-0.0576667	0.793983	-3.43275	0.00221052	0.0352033	-3.06912
MKNK2	AA	46570	14.1	13.1	14.2	0	1	0.852	0.1306	-0.163887	0.837419	-6.12905	2.66036e-06	0.000247547	3.65153
TLE2	ES	46652	10.3:10.4:10.5:11	10.1	12	0	0.9581	0.454	0.0571	-0.0306667	0.97964	-3.28235	0.00361631	0.0493152	-3.44093
AES	AP	46658	2	NA	NA	0	1	0.5059	0.063	0.0596042	0.827794	3.81768	0.000852482	0.0176681	-2.13658
NFIC	AP	46675	1	NA	NA	0	0.9686	0.5927	0.0907	-0.117161	0.294138	-5.44937	1.62961e-05	0.000987976	1.86175
NFIC	AP	46676	2	NA	NA	0	0.9686	0.5927	0.0907	0.117161	0.705862	5.44937	1.62961e-05	0.000987976	1.86175
PIP5K1C	ES	46724	18	16	19	0	0.9581	0.8594	0.136	-0.179455	0.468864	-5.58226	1.96281e-05	0.00114603	1.83038
TJP3	AP	46725	1	NA	NA	0	0.9808	0.9247	0.194	-0.245804	0.522119	-5.21885	2.85638e-05	0.00150664	1.29451
TJP3	AP	46727	2	NA	NA	0	0.9808	0.897	0.19	0.233896	0.432838	4.97141	5.23899e-05	0.0023561	0.683005
KDM4B	ES	46833	13	10	14	0	0.9668	0.5473	0.1187	0.167004	0.74865	4.39275	0.000218707	0.00666405	-0.749714
PTPRS	ES	46839	28	27.2	29	0	0.9005	0.7213	0.1268	-0.172219	0.387571	-4.5288	0.000191197	0.00609197	-0.526932
RPL36	RI	46862	4.2:4.3:4.4	4.1	4.5	0	1	0.0726	0.0098	0.00733333	0.0196708	4.47645	0.000162534	0.00535739	-0.493646
CATSPERD	AT	46924	23	NA	NA	0	1	0.8268	0.2075	-0.21655	0.222371	-3.97013	0.000582083	0.0133415	-1.76042
CATSPERD	AT	46925	20	NA	NA	0	1	0.8268	0.2075	0.21655	0.777629	3.97013	0.000582083	0.0133415	-1.76042
CAPS	AD	46956	4.2	4.1	5	0	0.993	0.3324	0.0473	0.0379773	0.882493	3.93635	0.000723436	0.0154528	-1.89873
CLPP	AP	47023	2.1	NA	NA	0	0.9878	0.5275	0.0737	-0.0601273	0.123052	-3.60755	0.00159631	0.0277557	-2.67956
CLPP	AP	47024	1	NA	NA	0	0.9878	0.5275	0.0737	0.0601273	0.876948	3.60755	0.00159631	0.0277557	-2.67956
TRIP10	ES	47083	11.1:11.2	10	12.2	0	0.9948	0.5637	0.1029	-0.089775	0.259088	-4.18061	0.000342876	0.00931107	-1.23644
TRIP10	ES	47084	11.2	10	12.2	0	0.993	0.1203	0.0202	-0.0191391	0.0206766	-3.7275	0.00112817	0.0218729	-2.37607
INSR	ES	47099	11	10	12	0	0.8901	0.9079	0.1606	-0.205416	0.59194	-4.48407	0.000266022	0.00768474	-0.758284
PNPLA6	AA	47111	24.1	23	24.2	0	0.9878	0.7206	0.0901	-0.0826955	0.383633	-4.15159	0.000429683	0.0107208	-1.38133
STXBP2	AP	47122	1	NA	NA	0	0.9965	0.805	0.1804	0.415245	0.597685	9.4178	4.18858e-09	1.80429e-06	10.3783
STXBP2	AP	47123	17.1	NA	NA	0	0.9965	0.805	0.1804	-0.415245	0.402315	-9.4178	4.18858e-09	1.80429e-06	10.3783
KANK3	AT	47221	11	NA	NA	0	0.9581	1	0.1848	0.27121	0.365576	5.32444	2.9687e-05	0.00154548	1.35412
KANK3	AT	47222	12	NA	NA	0	0.9581	1	0.1848	-0.27121	0.634424	-5.32444	2.9687e-05	0.00154548	1.35412
HNRNPM	RI	47236	6.2	6.1	6.3	0	1	0.5609	0.0818	-0.067	0.662529	-3.56402	0.00160058	0.027808	-2.75435
ZNF558	AP	47261	1	NA	NA	0	0.9808	0.7988	0.1445	-0.139641	0.344	-3.48127	0.00215827	0.0345717	-2.9752
ZNF846	AT	47401	6.2	NA	NA	0	0.9983	0.7662	0.11	0.0749125	0.352094	3.6003	0.00146333	0.0261898	-2.66671
PPAN	AT	47460	12.2	NA	NA	0	1	0.6115	0.0981	0.0974375	0.735435	4.45026	0.000173649	0.00563499	-0.559629
PPAN	AT	47461	13	NA	NA	0	1	0.6115	0.0981	-0.0974375	0.264565	-4.45026	0.000173649	0.00563499	-0.559629
SLC44A2	AP	47558	1	NA	NA	0	0.9948	1	0.1806	-0.168271	0.593002	-5.20674	2.58493e-05	0.00140565	1.35049
SLC44A2	AP	47559	2	NA	NA	0	0.9948	1	0.1806	0.168271	0.406998	5.20674	2.58493e-05	0.00140565	1.35049
ILF3	AT	47569	17.4	NA	NA	0	1	0.7065	0.0749	0.0711167	0.503246	3.73105	0.00105795	0.0208044	-2.34883
ILF3	AT	47570	20	NA	NA	0	1	0.7065	0.0749	-0.0711167	0.496754	-3.73105	0.00105795	0.0208044	-2.34883
YIPF2	AD	47605	1.2	1.1	2	0	0.9895	0.4936	0.0746	0.0784818	0.750391	3.81791	0.000962855	0.0193531	-2.18156
SMARCA4	AA	47609	37.1	36.2	37.2	0	0.993	0.4628	0.0555	-0.0566042	0.692715	-3.84091	0.000804425	0.0169114	-2.07947
SMARCA4	AA	47610	36.1	34	36.2	0	0.9895	0.4949	0.0628	-0.0508273	0.314676	-3.86669	0.000855995	0.0177272	-2.06528
SMARCA4	ES	47612	32	31	33	0	0.9895	0.4848	0.0678	-0.0713522	0.221828	-5.35846	2.03231e-05	0.00117804	1.63839
KANK2	AD	47636	2.3	2.2	3	0	0.9756	0.6364	0.0941	0.0774048	0.773407	3.65252	0.00152195	0.0269497	-2.59288
DOCK6	ES	47644	23	22	24	0	0.9494	0.5782	0.108	-0.0766905	0.921509	-3.32572	0.0032701	0.0459886	-3.34288
EPOR	ES	47692	4.1:4.2	3	5	0	0.815	1	0.2313	-0.248331	0.384519	-3.90703	0.00190195	0.0315828	-2.35556
PRKCSH	AD	47711	2.3	2.2	3.2	0	0.9965	0.3363	0.0279	0.0307957	0.0905106	4.24296	0.000316852	0.00882805	-1.11919
ACP5	AA	47749	2.1	1	2.2	0	0.9476	0.8692	0.1193	0.113543	0.366702	3.90086	0.000846614	0.0175713	-2.01288
ACP5	ES	47751	2.2	1	3.2	0	0.9686	0.8856	0.1179	-0.06815	0.595683	-3.51683	0.00198287	0.0326061	-2.89224
ZNF625	AT	47781	4.2	NA	NA	0	0.993	0.9368	0.1867	0.188874	0.468862	3.97275	0.000617601	0.0138597	-1.78161
ZNF625	AT	47783	6	NA	NA	0	0.993	0.9368	0.1867	-0.188874	0.531138	-3.97275	0.000617601	0.0138597	-1.78161
TNPO2	AP	47846	1	NA	NA	0	0.9913	0.8776	0.1702	0.250225	0.338083	9.18234	2.93139e-09	1.301e-06	10.6138
TNPO2	AP	47847	4	NA	NA	0	0.9913	0.2484	0.0417	-0.0593917	0.0755833	-5.23635	2.40041e-05	0.00134871	1.42512
TNPO2	AP	47848	3	NA	NA	0	0.9913	0.812	0.1406	-0.144596	0.442498	-4.13266	0.000386885	0.0100112	-1.3562
RTBDN	AA	47875	9.1	8	9.2	0	0.9965	0.8668	0.2357	-0.216952	0.893832	-3.97395	0.000615777	0.0138394	-1.77868
C19orf53	AP	47934	1	NA	NA	0	1	0.2383	0.0336	-0.029625	0.973933	-4.64254	0.000106857	0.00391258	-0.0746597
C19orf53	AP	47935	3	NA	NA	0	1	0.2383	0.0336	0.029625	0.0260667	4.64254	0.000106857	0.00391258	-0.0746597
BRD4	AT	48066	15	NA	NA	0	1	0.4707	0.0674	-0.0445958	0.277777	-4.71714	8.85196e-05	0.0034851	0.113778
WIZ	ES	48090	9	8	10	0	0.9913	0.686	0.1307	-0.204941	0.756498	-7.48918	1.93987e-07	3.18038e-05	6.43461
SMIM7	RI	48187	7.3	7.2	7.4	0	1	0.3399	0.0405	-0.0247625	0.932298	-3.60509	0.00144611	0.0259979	-2.65513
SMIM7	RI	48188	7.2:7.3	7.1	7.4	0	1	0.1435	0.0212	-0.02435	0.959754	-3.38638	0.00247611	0.0381203	-3.17941
NWD1	AD	48207	7.2	7.1	8	0	0.9372	0.8487	0.2164	0.21482	0.803486	3.38646	0.00299268	0.0434324	-3.2159
CPAMD8	AT	48218	42	NA	NA	0	0.9825	0.7272	0.0822	-0.0646917	0.912088	-4.02228	0.000510659	0.0121152	-1.63103
CPAMD8	AT	48219	19.2	NA	NA	0	0.9825	0.7272	0.0822	0.0646917	0.0879125	4.02228	0.000510659	0.0121152	-1.63103
MYO9B	ES	48232	37	36	38.1	1	0.9756	0.8311	0.1595	0.191226	0.524536	5.26013	2.58251e-05	0.00140565	1.39629
USHBP1	AA	48246	7.1:7.2	6	7.3	0	0.993	0.786	0.1555	0.22647	0.745317	5.37279	1.96272e-05	0.00114603	1.67362
USHBP1	RI	48248	3.2	3.1	3.3	0	1	0.7864	0.1781	0.302608	0.667279	7.76864	5.90044e-08	1.37094e-05	7.53624
USHBP1	AA	48249	3.1:3.2	2	3.3	0	1	0.392	0.055	0.0694667	0.965267	3.98563	0.000559879	0.0130057	-1.72199
SLC27A1	ES	48313	6	5	7	0	0.9825	0.2903	0.0343	-0.0239957	0.979172	-3.84679	0.000842048	0.0175263	-2.08792
ARRDC2	AP	48387	2	NA	NA	0	0.9808	0.8496	0.1619	-0.173959	0.622952	-4.12816	0.000454782	0.011146	-1.43783
ARRDC2	AP	48388	1	NA	NA	0	0.9808	0.8496	0.1619	0.173959	0.377048	4.12816	0.000454782	0.011146	-1.43783
FKBP8	AP	48444	2	NA	NA	0	0.9878	0.3539	0.0487	-0.0676909	0.0867761	-6.84206	7.84699e-07	9.19416e-05	5.0027
FKBP8	AP	48445	1.1	NA	NA	0	0.9878	0.3539	0.0487	0.0676909	0.913224	6.84206	7.84699e-07	9.19416e-05	5.0027
FKBP8	AA	48446	6.1	5	6.2	0	1	0.6236	0.0464	-0.0345458	0.692944	-3.94795	0.000615378	0.0138375	-1.81534
C19orf60	ES	48490	3.1:3.2	2	4	0	0.9878	0.4491	0.0531	-0.0597455	0.955809	-4.97031	5.93908e-05	0.00258632	0.602586
C19orf60	ES	48491	3.2	2	4	0	0.9616	0.7962	0.1566	-0.150676	0.865778	-4.5293	0.000190969	0.00608911	-0.525733
COPE	ES	48514	8	7	9	0	1	0.0887	0.0116	-0.0094625	0.981565	-3.40748	0.00235161	0.0366661	-3.12929
COPE	ES	48519	04:05:00	3	6	0	0.9267	1	0.2491	-0.282647	0.626377	-4.5996	0.000205305	0.00643234	-0.496723
ARMC6	ES	48581	2.2	1.1	5	0	0.9738	0.8178	0.1097	0.10573	0.338064	3.85085	0.00102627	0.0202845	-2.15973
ARMC6	AD	48582	1.2	1.1	5	0	0.9616	0.5995	0.1216	0.190616	0.180633	7.45464	5.34671e-07	7.06086e-05	5.5949
MEF2BNB	AT	48602	6.2	NA	NA	0	1	0.4375	0.0704	-0.0898792	0.881998	-4.59984	0.000119021	0.00423789	-0.182469
MEF2BNB	AT	48603	4.2	NA	NA	0	1	0.4375	0.0704	0.0898792	0.118002	4.59984	0.000119021	0.00423789	-0.182469
NR2C2AP	ES	48614	3	2	4.1	0	0.9983	0.2909	0.0506	0.0586208	0.903081	3.42156	0.00227196	0.0357925	-3.09579
ZNF66	AT	48728	5	NA	NA	0	1	0.6443	0.0994	-0.0774167	0.0979458	-4.62628	0.000111335	0.00402954	-0.115723
ZNF66	AT	48730	7	NA	NA	0	1	0.7059	0.1105	0.0853958	0.869844	4.6722	9.91497e-05	0.00373943	0.000244748
ZNF85	AT	48734	6	NA	NA	0	1	0.8231	0.168	-0.126775	0.697075	-7.6036	8.52342e-08	1.66445e-05	7.15995
ZNF85	AT	48735	5	NA	NA	0	1	0.8231	0.168	0.126775	0.302925	7.6036	8.52342e-08	1.66445e-05	7.15995
ZNF738	AT	48763	4	NA	NA	0	1	0.7463	0.1153	-0.149271	0.418444	-7.66461	7.4368e-08	1.57095e-05	7.29945
ZNF493	AT	48769	6	NA	NA	0	1	0.6988	0.1376	-0.129371	0.472706	-4.37015	0.000212573	0.00657749	-0.761183
ZNF493	AT	48770	5.2	NA	NA	0	1	0.76	0.1516	0.149142	0.344983	4.87102	6.00583e-05	0.0025987	0.502669
ZNF724P	AT	48813	4	NA	NA	0	1	0.7027	0.1114	0.139658	0.232258	6.71419	6.57634e-07	8.20884e-05	5.07355
ZNF724P	AT	48814	3.2	NA	NA	0	1	0.7027	0.1114	-0.139658	0.767742	-6.71419	6.57634e-07	8.20884e-05	5.07355
FXYD3	RI	49039	10.3	10.2	10.4	0	0.9878	0.3244	0.0495	0.043	0.0731468	4.42574	0.000201555	0.00632567	-0.668179
FXYD1	AP	49052	4	NA	NA	0	0.9005	0.5946	0.0642	-0.0746905	0.0712444	-4.39867	0.000260151	0.00757488	-0.835921
LSR	ES	49085	04:05:00	3	6	0	0.9948	0.7128	0.1264	-0.194562	0.343448	-8.42466	1.41764e-08	4.5466e-06	8.99692
LSR	ES	49086	5	3	6	0	0.9983	0.9162	0.1425	-0.180529	0.566515	-6.49548	1.10363e-06	0.000121228	4.54622
LSR	ES	49088	03:04:05	2.2	6	0	0.9895	0.6527	0.0694	-0.0672043	0.931909	-3.68472	0.00125259	0.0235287	-2.4789
LSR	ES	49089	03:05:00	2.2	6	0	0.9965	0.1484	0.0212	-0.0168583	0.980662	-3.27942	0.00321227	0.0454999	-3.43173
DMKN	ES	49144	21	20.1	22	0	0.9476	1	0.1247	-0.15475	0.356598	-5.5824	1.38608e-05	0.000873767	2.07507
DMKN	ES	49151	18.3	18.1	18.5	0	0.9459	0.8807	0.1896	-0.158695	0.367943	-5.75497	9.25323e-06	0.00065051	2.48554
DMKN	ES	49176	08:09:11	7	12	0	0.9476	0.7786	0.1688	-0.125652	0.227727	-4.21955	0.000397752	0.0102381	-1.26076
DMKN	ES	49177	08:11:00	7	12	0	0.9476	0.6484	0.0966	-0.109881	0.134716	-5.0574	5.51906e-05	0.00244452	0.725841
DMKN	ES	49178	11	7	12	0	0.9424	0.5098	0.0733	-0.0884143	0.161171	-5.10186	4.97562e-05	0.00226783	0.830742
DMKN	ES	49198	7:8:9:11	6.4	12	0	0.9162	1	0.2524	-0.276655	0.400102	-7.47922	3.66819e-07	5.08431e-05	5.91114
DMKN	ES	49199	07:08:11	6.4	12	0	0.9058	0.8575	0.1845	-0.362439	0.303012	-8.96424	5.58873e-08	1.34185e-05	8.01347
DMKN	ES	49200	07:11:00	6.4	12	0	0.9075	1	0.1659	-0.294221	0.383074	-5.96795	1.04619e-05	0.000709378	2.53516
DMKN	ES	49203	07:08:00	6.4	12	0	0.8988	1	0.1455	-0.140544	0.254368	-3.39769	0.00328731	0.0461463	-3.21827
DMKN	ES	49204	7	6.4	12	0	0.9721	0.637	0.1048	-0.102386	0.762735	-4.06301	0.000532517	0.0125076	-1.59473
DMKN	RI	49205	6.3	6.2	6.4	0	0.9511	0.8453	0.1215	0.107567	0.476707	3.95889	0.000737915	0.0157162	-1.87645
DMKN	RI	49206	6.2:6.3	6.1	6.4	0	0.9546	0.8575	0.1188	0.103652	0.384833	4.47227	0.000218553	0.00666398	-0.661187
RBM42	ES	49227	00:05:06.100000	4	6.2	0	0.993	0.5007	0.0794	-0.0622273	0.741524	-3.44056	0.00237778	0.0369954	-3.06989
RBM42	ES	49232	3.2:4:5:6.1:6.2:6.3:7:8:9.1	3.1	9.2	0	0.9983	0.1573	0.0114	-0.00788696	0.99614	-3.55784	0.00170648	0.0292089	-2.78209
RBM42	ES	49233	3.2:4:6.1:6.2:6.3:7:8:9.1	3.1	9.2	0	0.8988	0.8521	0.1476	-0.128738	0.946895	-3.48577	0.00315027	0.044795	-3.0707
U2AF1L4	AA	49277	3.1	2.2	3.2	0	0.9756	0.9838	0.1529	0.147243	0.639764	3.63368	0.00159096	0.0277065	-2.63658
PSENEN	AA	49282	2.1	1	2.2	0	1	0.1593	0.0221	0.0229875	0.930798	3.97467	0.000575489	0.0132595	-1.74916
ZNF260	ES	49390	3	2.2	5	0	0.9965	0.9289	0.1925	-0.180792	0.567667	-5.019	4.139e-05	0.00199521	0.876636
ZNF568	AT	49433	7	NA	NA	0	1	0.6182	0.1108	-0.0711458	0.499335	-3.62833	0.00136527	0.0249946	-2.59884
ZFP30	AT	49558	7.3	NA	NA	0	1	0.6706	0.1475	0.158383	0.791587	3.80878	0.000871634	0.0179095	-2.15844
ZFP30	AT	49559	8	NA	NA	0	1	0.6706	0.1475	-0.158383	0.208413	-3.80878	0.000871634	0.0179095	-2.15844
PPP1R14A	AP	49593	2.1	NA	NA	0	0.9895	0.7295	0.0971	-0.0804227	0.174589	-3.70722	0.00125684	0.0235794	-2.4444
PPP1R14A	AP	49594	1	NA	NA	0	0.9895	0.7295	0.0971	0.0804273	0.825409	3.70739	0.00125633	0.0235794	-2.444
YIF1B	AP	49603	1.1	NA	NA	0	0.9895	0.9458	0.1491	-0.186862	0.65486	-3.54055	0.00169598	0.0291005	-2.81089
EIF3K	ES	49679	6	5	7.1	0	1	0.0613	0.0057	-0.007275	0.993008	-3.54574	0.00167444	0.0288071	-2.79841
EIF3K	AD	49686	1.2	1.1	2	1	0.9424	0.7181	0.1413	-0.160753	0.815009	-4.93357	9.76008e-05	0.00370185	0.256448
HNRNPL	AP	49697	2	NA	NA	0	0.9948	0.9891	0.1108	0.100321	0.231631	3.93723	0.000632139	0.0140702	-1.84187
HNRNPL	AP	49698	1	NA	NA	0	0.9948	0.9891	0.1108	-0.100317	0.768371	-3.93703	0.000632453	0.0140702	-1.84236
MRPS12	AD	49738	1.2	1.1	1.4	0	0.9895	0.5976	0.0841	0.132236	0.202867	5.48365	1.74901e-05	0.00103989	1.83911
PAK4	ES	49758	5.1:5.2	4	6	0	0.993	0.4888	0.0414	0.0692522	0.937366	5.5973	1.13944e-05	0.000757408	2.22406
DYRK1B	AA	49846	10.1:10.2	9	10.3	0	0.9686	0.7654	0.1245	0.0978095	0.312731	3.51037	0.00212534	0.0342817	-2.92132
LTBP4	ES	49933	1 day, 2:27:00	25	28	1	0.9546	0.4577	0.0763	-0.0912609	0.80836	-5.25706	2.60192e-05	0.00140792	1.38872
LTBP4	ES	49934	1 day, 1:26:27	24	28	1	0.9721	0.4837	0.082	-0.0706261	0.795849	-4.23539	0.000322835	0.00893828	-1.1378
LTBP4	ES	49935	1 day, 2:27:00	24	28	1	0.9389	0.621	0.1222	-0.138025	0.534205	-5.97867	8.2267e-06	0.000606484	2.7182
HNRNPUL1	AP	50028	1	NA	NA	0	0.9965	0.8993	0.1438	0.0895522	0.138483	3.45903	0.00216828	0.0346855	-3.01611
TMEM91	AA	50054	7.3:7.4:7.5:7.6	7.1	7.7	0	0.8517	1	0.2315	-0.164631	0.470487	-4.00537	0.00106591	0.020943	-1.98389
ATP5SL	ES	50073	6.1	5	7	0	0.993	0.6834	0.1506	-0.0985318	0.793996	-3.96264	0.000678888	0.0147741	-1.83574
ARHGEF1	AP	50098	1	NA	NA	0	0.9843	0.8499	0.1551	-0.132777	0.671648	-4.42235	0.000222925	0.00675317	-0.726397
ARHGEF1	AP	50099	2	NA	NA	0	0.9843	0.8499	0.1551	0.132777	0.328352	4.42235	0.000222925	0.00675317	-0.726397
ARHGEF1	ES	50100	29	28	30	0	1	0.4172	0.0548	0.0415125	0.897331	3.38615	0.00247747	0.0381278	-3.17995
PRR19	AP	50148	1	NA	NA	0	1	0.631	0.1111	0.112471	0.19696	4.05607	0.00046909	0.0113809	-1.54704
PRR19	AP	50149	2.1	NA	NA	0	1	0.631	0.1111	-0.112471	0.80304	-4.05607	0.00046909	0.0113809	-1.54704
TMEM145	AT	50151	16	NA	NA	0	1	0.8756	0.2153	0.224717	0.201225	3.5698	0.00157789	0.0275335	-2.7404
TMEM145	AT	50152	14	NA	NA	0	1	0.8756	0.2153	-0.224717	0.798775	-3.5698	0.00157789	0.0275335	-2.7404
MEGF8	ES	50158	30	29	31	1	0.8691	0.7624	0.1281	-0.0796167	0.195726	-3.44537	0.00296039	0.0431421	-3.11493
CEACAM1	ES	50162	9	8	10	0	0.9825	0.9115	0.1928	-0.404177	0.4416	-7.65466	1.36919e-07	2.37785e-05	6.79211
PLAUR	AT	50230	8	NA	NA	0	1	0.4093	0.0567	-0.0613208	0.854935	-5.19144	2.68585e-05	0.00144444	1.3119
PLAUR	AT	50231	9	NA	NA	0	1	0.4093	0.0567	0.0613208	0.145065	5.19144	2.68585e-05	0.00144444	1.3119
ZNF223	AT	50274	9.2	NA	NA	0	1	0.7613	0.109	-0.106713	0.467685	-4.10912	0.000410503	0.0104011	-1.41493
ZNF226	AA	50295	3.1:3.2	1	3.3	0	0.9948	1	0.119	0.141665	0.230357	3.51163	0.00190902	0.0316642	-2.89177
BCAM	AT	50346	15	NA	NA	0	0.9983	0.6701	0.1158	-0.144887	0.851166	-5.74131	8.05836e-06	0.000598598	2.57529
BCAM	AT	50347	13.2	NA	NA	0	0.9983	0.6701	0.1158	0.144887	0.148834	5.74131	8.05836e-06	0.000598598	2.57529
PVRL2	AT	50348	10	NA	NA	0	1	0.7081	0.1177	0.142538	0.424077	5.17155	2.82296e-05	0.00149982	1.26174
PVRL2	AT	50349	6	NA	NA	0	1	0.7081	0.1177	-0.142538	0.575923	-5.17155	2.82296e-05	0.00149982	1.26174
APOC1	AP	50356	1	NA	NA	0	0.9668	0.7453	0.1475	0.175259	0.682267	3.85008	0.000890992	0.0182595	-2.10491
APOC1	AP	50357	2.1	NA	NA	0	0.9668	0.7453	0.1475	-0.175259	0.317733	-3.85008	0.000890992	0.0182595	-2.10491
APOC2	RI	50375	4.4	4.3	4.5	0	0.9983	0.9984	0.2268	0.258767	0.167767	5.23754	2.39331e-05	0.00134644	1.42811
ERCC1	AP	50438	3.1	NA	NA	0	0.9983	0.9626	0.1299	0.168992	0.606083	6.53128	1.01356e-06	0.000112743	4.6329
ERCC1	AP	50439	2.1	NA	NA	0	0.9983	0.9679	0.1238	-0.152583	0.36605	-5.72513	7.13469e-06	0.000546139	2.651
ERCC1	AT	50441	11	NA	NA	0	1	0.6863	0.1051	-0.092625	0.640988	-4.64723	0.0001056	0.00388738	-0.0628212
ERCC1	AT	50442	10.2	NA	NA	0	1	0.6863	0.1051	0.0926208	0.359015	4.64719	0.00010561	0.00388738	-0.0629153
SNRPD2	ES	50513	4	1.3	5.1	0	1	0.1214	0.0069	0.00948333	0.0104292	3.41476	0.00231011	0.0361731	-3.11198
DMWD	ES	50528	4	3	5	0	0.9948	0.7203	0.1137	-0.145075	0.615521	-5.0272	4.05465e-05	0.00196637	0.89734
SLC1A5	AP	50595	3.1	NA	NA	0	1	0.3537	0.0322	0.0327333	0.0332875	3.53316	0.00172719	0.0294716	-2.82869
AP2S1	AP	50597	2	NA	NA	0	0.9983	0.529	0.057	0.0600292	0.0879063	3.83716	0.000812005	0.0170463	-2.0887
AP2S1	AP	50598	1.1	NA	NA	0	0.9983	0.529	0.0569	-0.05905	0.911604	-3.7618	0.000979977	0.0196383	-2.27363
BAX	RI	50836	6.2	6.1	6.3	0	1	0.6663	0.1005	0.08445	0.334454	3.66047	0.00126071	0.023625	-2.52081
NTF4	AT	50880	7	NA	NA	0	0.9634	0.7759	0.124	0.101513	0.118477	3.24745	0.00347078	0.0478654	-3.50657
NTF4	AT	50881	3.2	NA	NA	0	0.9634	0.7759	0.124	-0.101513	0.881523	-3.24745	0.00347078	0.0478654	-3.50657
SNRNP70	ES	50887	8.1:8.2	7	9	0	1	0.2316	0.0313	-0.0358875	0.0359771	-3.78131	0.00093345	0.0189091	-2.22583
SNRNP70	ES	50888	8.1	7	9	0	1	0.3354	0.0554	-0.0444125	0.0614604	-3.36791	0.00259027	0.0392995	-3.22318
TEAD2	ES	50921	6	5	7.1	0	0.9895	0.9175	0.1603	-0.203987	0.537615	-5.11401	3.26079e-05	0.00166209	1.11656
FCGRT	AP	50957	1	NA	NA	0	0.9983	0.6735	0.1366	-0.174692	0.473017	-5.89908	4.65582e-06	0.000379531	3.08355
FCGRT	AP	50958	2.1	NA	NA	0	0.9983	0.6735	0.1366	0.174692	0.526983	5.89908	4.65582e-06	0.000379531	3.08355
IRF3	ES	51012	1.2:1.3:1.4:2	1.1	3	0	1	0.7529	0.1004	-0.104487	0.945244	-4.0796	0.000442142	0.010957	-1.48847
IRF3	ES	51014	1.4:2	1.1	3	0	0.9895	0.5256	0.0358	-0.0209227	0.988185	-3.8601	0.000869705	0.0179095	-2.081
PTOV1	AP	51094	1	NA	NA	0	0.9895	0.7657	0.0973	-0.0609955	0.17088	-4.00117	0.000618485	0.0138597	-1.74332
PTOV1	AP	51095	2	NA	NA	0	0.9895	0.7657	0.0973	0.0609955	0.82912	4.00117	0.000618485	0.0138597	-1.74332
PNKP	AP	51101	2.1	NA	NA	0	0.9337	0.9528	0.1644	-0.15994	0.333866	-5.01119	7.07753e-05	0.0029657	0.526586
PNKP	AP	51102	1	NA	NA	0	0.9337	0.9528	0.1644	0.15994	0.666134	5.01119	7.07753e-05	0.0029657	0.526586
PNKP	AA	51107	3.1	2.2	3.2	0	0.993	0.87	0.1155	0.124654	0.190852	3.34329	0.00275049	0.0409803	-3.2814
IL4I1	AP	51118	5	NA	NA	0	0.9546	0.6799	0.0965	0.0876105	0.602072	3.36886	0.00329541	0.0461862	-3.26715
IL4I1	AP	51119	1	NA	NA	0	0.9546	0.6799	0.0965	-0.0876105	0.397928	-3.36886	0.00329541	0.0461862	-3.26715
NUP62	AA	51128	1.4	1.2	1.5	0	0.9372	0.7766	0.1468	0.143589	0.382762	3.85816	0.00119169	0.0227359	-2.21095
ATF5	AP	51133	2.1	NA	NA	0	0.9948	0.9717	0.1565	-0.1289	0.678252	-3.3009	0.00330967	0.0463424	-3.39216
ATF5	AP	51134	1	NA	NA	0	0.9948	0.9717	0.1565	0.1289	0.321748	3.3009	0.00330967	0.0463424	-3.39216
VRK3	AT	51145	17	NA	NA	0	1	0.7037	0.1015	-0.0951583	0.5634	-3.69354	0.00116136	0.0222872	-2.44034
MYH14	ES	51169	7	6.1	9	0	0.9651	0.9676	0.272	0.6384	0.464853	11.955	2.9745e-11	4.18721e-08	15.4026
JOSD2	ES	51205	4	3.2	5	0	0.9948	0.3478	0.0565	-0.0716875	0.912315	-6.52245	1.03504e-06	0.000113979	4.61155
KLK10	AP	51263	3	NA	NA	0	1	0.8125	0.1915	-0.204742	0.343533	-5.27593	2.17438e-05	0.00124236	1.52483
KLK10	AP	51264	5	NA	NA	0	1	0.8523	0.2179	0.2139	0.608062	4.87063	6.01166e-05	0.0025987	0.501694
FPR1	ES	51371	2	1	3	0	0.8447	0.4418	0.0637	-0.075319	0.118658	-6.01377	6.18836e-06	0.000485543	2.94998
ZNF577	AT	51377	6.2	NA	NA	0	1	0.9311	0.1629	0.173233	0.566579	4.53546	0.000140034	0.00478445	-0.344916
ZNF577	AT	51378	8	NA	NA	0	1	0.9311	0.1629	-0.173233	0.433421	-4.53546	0.000140034	0.00478445	-0.344916
ZNF677	AT	51704	5.2	NA	NA	0	1	0.2043	0.0419	-0.027875	0.09085	-3.75132	0.00100589	0.0199805	-2.29928
ZNF765	AT	51715	9	NA	NA	0	1	0.4347	0.0682	-0.0913375	0.0946354	-5.35292	1.79433e-05	0.00106396	1.71863
ZNF765	AT	51718	4	NA	NA	0	1	0.6244	0.1069	0.115142	0.824567	4.48368	0.000159595	0.00528034	-0.475443
ZNF331	ES	51729	10	9	11	0	0.8377	0.5542	0.0732	-0.073019	0.0902933	-4.57181	0.000172715	0.00561297	-0.424782
MYADM	AA	51744	3.3	2	3.4	0	0.9895	0.5138	0.0755	0.0501	0.131129	3.25206	0.00343231	0.0474988	-3.4958
VSTM1	ME	51760	3|4	2	5	0	0.9843	0.8892	0.1596	-0.0898043	0.165287	-3.36472	0.00272184	0.0406638	-3.23756
NDUFA3	AT	51774	5.2	NA	NA	0	1	0.2814	0.0498	0.0672125	0.135865	5.29427	2.07701e-05	0.00119921	1.57104
NDUFA3	AT	51776	4.4	NA	NA	0	1	0.5532	0.0866	-0.0967375	0.787527	-4.87367	5.96586e-05	0.00259276	0.509371
TSEN34	AP	51806	3.1	NA	NA	0	0.9808	0.7397	0.123	0.134986	0.626741	4.21133	0.000371778	0.00975606	-1.23715
TSEN34	AP	51807	1.1	NA	NA	0	0.9808	0.6948	0.1035	-0.09155	0.291546	-3.28915	0.00340265	0.0472677	-3.41909
LILRB4	ES	51930	13.1:13.2	12.2	14	0	0.993	0.8189	0.1362	0.0843652	0.810545	4.23394	0.000323998	0.00896463	-1.14138
LILRB4	ES	51931	13.2	12.2	14	0	0.9825	0.8524	0.1358	0.0744524	0.81124	3.64112	0.00156334	0.0273666	-2.61933
BRSK1	AP	52056	1	NA	NA	0	0.9546	0.562	0.0568	-0.0454056	0.972383	-3.40235	0.00325383	0.0458816	-3.20817
RPL28	AT	52095	4.4	NA	NA	0	1	0.7635	0.1403	-0.111221	0.510648	-3.90011	0.000693732	0.015008	-1.93359
RPL28	AT	52096	3	NA	NA	0	1	0.492	0.0928	0.0742625	0.22116	4.00825	0.000528969	0.0124354	-1.66587
ISOC2	AA	52104	4.1	3	4.2	0	0.9843	0.2834	0.0384	0.0394727	0.0840848	4.82569	8.40942e-05	0.00335598	0.252132
ISOC2	ES	52105	00:03:04.100000	2	4.2	0	0.9773	1	0.2153	-0.30317	0.463473	-7.54172	3.24358e-07	4.64568e-05	6.03784
ISOC2	ES	52106	3	2	4.2	0	0.9948	0.8187	0.1195	-0.197726	0.872917	-5.02903	4.54738e-05	0.00212783	0.825575
MZF1	AP	52484	1.1	NA	NA	0	0.9808	0.838	0.1284	-0.111674	0.641917	-3.30721	0.00312464	0.0445616	-3.37162
MZF1	AP	52485	2	NA	NA	0	0.9808	0.838	0.1284	0.111674	0.358083	3.30721	0.00312464	0.0445616	-3.37162
ITGB1BP1	AA	52617	8.1:8.2	7	8.3	0	1	0.9433	0.1799	-0.259813	0.442327	-7.39349	1.36844e-07	2.37785e-05	6.67586
ITGB1BP1	ES	52618	8.1	7	8.3	0	1	0.2895	0.0401	-0.0472458	0.939652	-4.11612	0.000403333	0.0103033	-1.39747
IAH1	AP	52628	2	NA	NA	0	0.9983	0.4615	0.055	-0.0787333	0.935558	-5.58578	1.00633e-05	0.000694134	2.30293
IAH1	AP	52629	1	NA	NA	0	0.9983	0.4615	0.055	0.0787333	0.0644417	5.58578	1.00633e-05	0.000694134	2.30293
HPCAL1	ES	52659	6	5	7	0	0.9948	0.7996	0.11	0.153525	0.2852	5.22433	2.47368e-05	0.00137755	1.39482
PQLC3	ES	52678	5	4	7	0	0.9965	0.2213	0.0337	0.025575	0.948758	3.51403	0.0018105	0.0303741	-2.87466
GREB1	AT	52703	12	NA	NA	0	1	0.5918	0.1004	-0.0991375	0.188681	-4.30895	0.000248082	0.00730089	-0.91493
PUM2	AD	52773	19.2	19.1	20	0	0.993	0.3984	0.0611	0.0466542	0.17734	3.29247	0.00311219	0.0444693	-3.4011
PUM2	ES	52774	16	15	17	0	1	0.5518	0.1007	0.152329	0.710352	9.51792	1.49363e-09	8.11392e-07	11.3061
TP53I3	ES	52810	4	3	5	0	1	0.2738	0.0462	0.040225	0.913267	4.06414	0.000459675	0.0112144	-1.52697
DNMT3A	AP	52853	2	NA	NA	0	0.7906	0.7836	0.1624	-0.2366	0.255433	-4.77732	0.00366634	0.0497658	-2.04081
DNMT3A	AP	52854	8	NA	NA	0	0.7906	1	0.1963	0.391683	0.629033	7.89707	0.00030242	0.00853419	0.751248
DNMT3A	AT	52856	27	NA	NA	0	1	0.6035	0.0868	0.163288	0.831519	7.4577	1.18336e-07	2.16644e-05	6.8244
DNMT3A	AT	52857	5.2	NA	NA	0	1	0.6035	0.0868	-0.163288	0.168481	-7.4577	1.18336e-07	2.16644e-05	6.8244
DTNB	ES	52862	21	20	22	0	0.9825	0.7103	0.1118	0.13474	0.475668	3.97718	0.00076586	0.0161836	-1.86857
GAREML	AP	52882	1	NA	NA	0	0.986	0.8599	0.2153	0.208387	0.147311	3.50277	0.00195045	0.0321813	-2.91275
GAREML	AP	52883	3	NA	NA	0	0.986	0.8599	0.2153	-0.208387	0.852689	-3.50277	0.00195045	0.0321813	-2.91275
CGREF1	AT	52933	9	NA	NA	0	0.9895	0.9228	0.1767	-0.283273	0.496957	-5.43344	1.96926e-05	0.00114603	1.71885
CGREF1	AT	52934	7.4	NA	NA	0	0.9895	0.9228	0.1767	0.283273	0.503043	5.43344	1.96926e-05	0.00114603	1.71885
PREB	ES	52944	6	5	7	0	1	0.1325	0.0201	0.0225917	0.960963	4.49649	0.000154514	0.00515886	-0.443158
SLC5A6	AP	52946	1	NA	NA	0	0.9459	0.9712	0.1726	-0.23924	0.504002	-4.81347	0.000111103	0.00402445	0.0701125
SLC5A6	AP	52948	2	NA	NA	0	0.9459	0.9712	0.1707	0.214305	0.48068	4.26639	0.000391837	0.0101214	-1.19888
KRTCAP3	AP	53011	2.1	NA	NA	0	0.9686	0.4276	0.0709	0.090835	0.0969	5.22997	4.31381e-05	0.0020513	1.02899
KRTCAP3	AP	53012	1	NA	NA	0	0.9686	0.4276	0.0709	-0.090835	0.9031	-5.22997	4.31381e-05	0.0020513	1.02899
MRPL33	ES	53046	3	2	4	0	1	0.5424	0.0877	0.0963042	0.688115	6.47406	1.16136e-06	0.000126504	4.49432
BRE	ES	53054	14	12	15	0	0.9983	0.4367	0.0803	-0.118217	0.251692	-6.70922	6.65367e-07	8.28184e-05	5.06164
PLB1	AT	53064	35	NA	NA	0	0.9983	0.8473	0.1404	0.150312	0.158406	3.64318	0.00131594	0.0243145	-2.56281
PLB1	AT	53065	60	NA	NA	0	0.9983	0.8473	0.1404	-0.150312	0.841594	-3.64318	0.00131594	0.0243145	-2.56281
CLIP4	AT	53087	19.2	NA	NA	0	1	0.5375	0.0892	-0.0824167	0.854271	-4.82382	6.76411e-05	0.00286046	0.383379
CLIP4	AT	53088	18.2	NA	NA	0	1	0.5353	0.0884	0.0749458	0.140998	4.80062	7.17149e-05	0.00300096	0.324734
LTBP1	ES	53183	26	25	27	0	1	0.3272	0.0526	0.072175	0.895217	3.76169	0.000980246	0.0196383	-2.2739
FEZ2	ES	53198	8	7	9	0	1	0.5119	0.071	0.0941708	0.153402	3.9615	0.000594822	0.0135206	-1.7818
HNRNPLL	AT	53259	6.3	NA	NA	0	1	0.6394	0.0814	0.09255	0.170571	4.53793	0.000139162	0.00476453	-0.338677
MTA3	AT	53366	22	NA	NA	0	1	0.7498	0.1588	-0.318442	0.450621	-10.4737	2.36414e-10	1.76061e-07	13.2002
MTA3	AT	53367	18.2	NA	NA	0	1	0.7498	0.1588	0.318442	0.549379	10.4737	2.36414e-10	1.76061e-07	13.2002
RHOQ	ES	53466	2	1	3	0	1	0.3231	0.0358	-0.02725	0.949913	-3.64196	0.00131992	0.0243573	-2.56577
TTC7A	AP	53482	3	NA	NA	0	0.9965	0.8842	0.1669	-0.186337	0.712623	-5.45362	1.39658e-05	0.00087661	1.97168
TTC7A	AP	53483	1	NA	NA	0	0.9965	0.8842	0.1669	0.186333	0.287379	5.4537	1.39632e-05	0.00087661	1.97186
ACYP2	AP	53565	7	NA	NA	0	1	0.9551	0.1088	-0.119325	0.713175	-3.30445	0.00302298	0.0436602	-3.37295
SPTBN1	AP	53576	1	NA	NA	0	0.986	0.8314	0.201	-0.556288	0.39059	-20.6547	1.27169e-16	2.79378e-12	28.0153
SPTBN1	AP	53577	3	NA	NA	0	0.986	0.8314	0.201	0.556288	0.60941	20.6547	1.27169e-16	2.79378e-12	28.0153
RTN4	ES	53592	6.1:6.2	5	8	0	0.9581	0.9961	0.1932	0.209813	0.213281	3.65615	0.00127428	0.0237659	-2.5313
RTN4	ES	53594	5	2.5	8	0	0.9983	0.2576	0.0398	-0.0430542	0.0983437	-5.93267	4.28897e-06	0.000359635	3.16678
RPS27A	RI	53606	2.2	2.1	2.3	0	1	0.4853	0.0451	0.038675	0.0625083	7.14615	2.40704e-07	3.71089e-05	6.09891
MTIF2	ES	53607	4	3	5	0	1	0.7504	0.133	-0.138137	0.567694	-5.03417	3.98428e-05	0.00194081	0.914945
EFEMP1	ES	53639	2.2	1	3	0	0.9721	0.7255	0.093	-0.0909955	0.419561	-7.22664	3.39706e-07	4.79936e-05	5.8601
VRK2	ES	53645	18	17	19	0	1	0.4222	0.0762	-0.0846833	0.270838	-4.47414	0.000163486	0.00538071	-0.499475
FANCL	AT	53651	9.2	NA	NA	0	1	0.6683	0.0783	-0.0885583	0.247108	-4.02623	0.000505624	0.0120387	-1.62123
FANCL	AT	53652	14	NA	NA	0	1	0.6683	0.0783	0.0885625	0.75289	4.02639	0.000505419	0.0120387	-1.62083
EHBP1	ES	53718	18	17	19	0	0.9948	0.8957	0.1766	0.345467	0.521458	10.5111	2.20482e-10	1.69957e-07	13.2719
WDPCP	AT	53727	23	NA	NA	0	1	0.23	0.0392	-0.0408	0.0775458	-3.60653	0.00144096	0.0259267	-2.65164
WDPCP	AT	53729	19	NA	NA	0	1	0.2478	0.0402	0.0398708	0.919248	3.53673	0.00171205	0.0292701	-2.8201
UGP2	ES	53757	8	6	9	0	1	0.2077	0.0235	-0.0221	0.0634333	-3.69418	0.00115951	0.0222864	-2.43878
AFTPH	ES	53773	8	7	9	0	1	0.5186	0.0823	0.109204	0.196002	5.378	1.68566e-05	0.00101597	1.78169
ANTXR1	AT	53844	13	NA	NA	0	1	0.4733	0.0696	0.0571042	0.0798229	5.58844	9.9973e-06	0.00069175	2.30959
ANTXR1	AT	53845	20	NA	NA	0	1	0.4682	0.0694	-0.0607792	0.917852	-6.48506	1.13135e-06	0.000123963	4.52097
TIA1	AT	53867	10.2	NA	NA	0	1	0.2671	0.0473	0.0342	0.120592	3.30549	0.00301531	0.0436412	-3.37049
TIA1	AT	53868	15	NA	NA	0	1	0.4083	0.0631	-0.0707375	0.839531	-4.15095	0.000369471	0.00973277	-1.31054
TIA1	AT	53869	9.2	NA	NA	0	1	0.2294	0.0309	0.0365417	0.0398708	4.1098	0.000409803	0.0104011	-1.41324
TEX261	ES	53912	3	2	4	0	1	0.2925	0.0376	-0.0262708	0.971056	-4.45921	0.000169769	0.00553361	-0.537092
DYSF	AP	53934	1	NA	NA	0	0.9407	0.9595	0.2235	0.273183	0.432455	5.71619	8.55912e-06	0.000621604	2.51413
DYSF	AP	53935	2	NA	NA	0	0.9407	0.9595	0.2235	-0.273183	0.567545	-5.71619	8.55912e-06	0.000621604	2.51413
DYSF	ES	53938	7	6	8	0	0.836	0.7117	0.1048	-0.05949	0.958884	-3.30811	0.00357917	0.049018	-3.39099
CCT7	ES	53961	2:3:4:5.1:5.2:6:7	1	8	0	0.9197	0.8224	0.2079	-0.214772	0.797732	-4.17718	0.000590025	0.0134603	-1.50613
BOLA3	ES	54017	3	2	4	0	1	0.5286	0.0748	0.0790208	0.785831	3.71142	0.00111087	0.0216259	-2.39674
C2orf81	AP	54050	1	NA	NA	0	0.993	0.8101	0.1709	-0.18295	0.639726	-4.50118	0.000184181	0.00591129	-0.535254
C2orf81	AP	54051	2.1	NA	NA	0	0.993	0.8101	0.1709	0.18295	0.360274	4.50118	0.000184181	0.00591129	-0.535254
HTRA2	ES	54103	7	6	8	0	1	0.196	0.0303	0.0254792	0.94254	4.13976	0.000380027	0.00989783	-1.33848
GCFC2	AT	54158	3.3	NA	NA	0	1	0.7042	0.1221	0.129904	0.289902	5.64494	8.69434e-06	0.000623888	2.45087
GCFC2	AT	54159	17	NA	NA	0	1	0.7042	0.1221	-0.1299	0.7101	-5.64449	8.70415e-06	0.000623888	2.44973
TRABD2A	AT	54188	5	NA	NA	0	0.9808	0.7997	0.134	0.180517	0.224011	4.43009	0.000199399	0.00628945	-0.657439
TRABD2A	AT	54189	8	NA	NA	0	0.9808	0.7997	0.134	-0.180517	0.775989	-4.43009	0.000199399	0.00628945	-0.657439
CAPG	AP	54271	1.1	NA	NA	0	0.9983	0.8954	0.1593	0.183804	0.499256	5.10954	3.29755e-05	0.00167307	1.10528
CAPG	AP	54272	2	NA	NA	0	0.9983	0.8954	0.1593	-0.183804	0.500744	-5.10954	3.29755e-05	0.00167307	1.10528
MAT2A	AT	54280	10	NA	NA	0	1	0.5262	0.0858	-0.104371	0.853435	-3.91135	0.000674478	0.0146968	-1.90583
MAT2A	AT	54281	9.2	NA	NA	0	1	0.5262	0.0858	0.104367	0.146567	3.91124	0.000674667	0.0146968	-1.90611
USP39	RI	54316	14.2	14.1	14.3	0	1	0.331	0.0481	-0.0515583	0.9407	-4.29212	0.000258846	0.0075469	-0.957174
USP39	AA	54320	5.1	4	5.2	0	1	0.3067	0.0363	-0.0334583	0.0660917	-4.10169	0.000418244	0.0105243	-1.43344
SFTPB	AA	54324	12.1	11	12.2	0	1	0.4568	0.0811	0.110654	0.72269	5.02214	4.10652e-05	0.00198277	0.884556
KANSL3	ES	54543	23.1:23.2:23.3	22	24	0	1	0.4888	0.0707	-0.0561708	0.895281	-4.1507	0.000369711	0.00973298	-1.31119
KANSL3	ES	54545	18	17	19.1	0	0.993	0.4141	0.0391	-0.034575	0.0684875	-3.47555	0.0019902	0.0327	-2.96691
KANSL3	ES	54547	6	5.2	7	0	0.986	0.4486	0.0759	0.0715708	0.892281	4.32332	0.000239249	0.00712203	-0.878861
KANSL3	AA	54567	5.1	3.2	5.2	0	0.9267	0.903	0.1505	0.17792	0.404468	4.57372	0.00019266	0.00611633	-0.485457
REV1	RI	54712	22.2	22.1	22.3	0	0.9983	0.6492	0.0872	0.103883	0.254375	4.08312	0.000438251	0.0108852	-1.47972
RNF149	AT	54740	9	NA	NA	0	1	0.3826	0.0665	-0.0539833	0.196837	-4.86826	6.04759e-05	0.00260254	0.495715
RNF149	AT	54741	7	NA	NA	0	1	0.3826	0.0665	0.0539875	0.80316	4.86886	6.0385e-05	0.00260117	0.497223
MAP4K4	AD	54753	30.2	30.1	31	0	1	0.4617	0.0683	-0.0596125	0.268294	-3.51729	0.00179602	0.0301773	-2.86682
MAP4K4	ES	54760	17:18:00	16.2	19	0	0.9651	1	0.0948	0.0725826	0.0435574	3.27145	0.00340377	0.0472677	-3.45459
MAP4K4	ES	54762	17	16.2	19	0	0.9913	0.8978	0.1359	0.240633	0.405133	7.02877	3.15563e-07	4.56093e-05	5.82246
ACOXL	AT	54941	21	NA	NA	0	0.9895	0.9434	0.1527	-0.198868	0.757998	-3.91976	0.000753029	0.0159761	-1.93844
ACOXL	AT	54942	11	NA	NA	0	0.9895	0.8345	0.1099	0.10965	0.125548	4.43084	0.000218387	0.00666352	-0.705816
BCL2L11	ES	54956	9	7	11	0	0.8796	0.8051	0.119	-0.149147	0.202344	-4.47389	0.000351759	0.00941303	-0.924689
IL1RN	AP	55028	3	NA	NA	0	0.925	1	0.2697	0.233881	0.124467	4.32707	0.000308251	0.00867644	-1.00585
IL1RN	AP	55030	6.1	NA	NA	0	0.925	1	0.2801	-0.295505	0.842229	-5.46556	2.14481e-05	0.00123147	1.68419
SLC35F5	AT	55067	16.3	NA	NA	0	1	0.408	0.0693	-0.0825917	0.879437	-4.26889	0.000274463	0.00788709	-1.01542
SLC35F5	AT	55068	7.2	NA	NA	0	1	0.408	0.0693	0.0825917	0.120563	4.26889	0.000274463	0.00788709	-1.01542
SLC35F5	AD	55071	1.2	1.1	2	0	0.9756	0.4377	0.07	0.06985	0.106683	3.79207	0.000908752	0.0184941	-2.19946
DBI	ES	55117	3.1:3.2	1.1	5	0	1	0.2311	0.0232	-0.0155083	0.0378625	-5.80947	5.79875e-06	0.000458248	2.86102
PCDP1	AT	55125	28	NA	NA	0	0.9075	1	0.2006	-0.166755	0.639261	-3.32991	0.00309066	0.0442336	-3.32557
EPB41L5	AT	55145	17	NA	NA	0	1	0.7869	0.0992	0.0738208	0.828706	5.55282	1.09189e-05	0.000731334	2.22041
EPB41L5	AT	55146	26	NA	NA	0	1	0.7869	0.0992	-0.0738208	0.171294	-5.55282	1.09189e-05	0.000731334	2.22041
CLASP1	ES	55172	29	28.1	31.1	0	0.911	0.88	0.1632	0.138755	0.34043	4.35016	0.000322788	0.00893828	-1.00445
BIN1	ES	55194	13:17:00	12	18	0	0.9913	0.5361	0.1052	0.154373	0.749643	4.52224	0.000175024	0.00567544	-0.484156
BIN1	ES	55200	13	12	17	0	0.9895	0.7812	0.1521	0.279605	0.516876	8.57986	2.08826e-08	6.11694e-06	8.72452
LIMS2	AP	55229	9	NA	NA	0	0.9023	0.4466	0.0859	-0.0561762	0.0714511	-3.72597	0.00128001	0.0238304	-2.42207
SMPD4	ES	55293	12	11	14	0	0.9878	0.9018	0.1341	-0.0968476	0.195124	-3.42713	0.00258214	0.0392032	-3.11212
ARHGEF4	AT	55355	14.3	NA	NA	0	1	0.8827	0.2206	-0.178767	0.560992	-3.4829	0.00195462	0.0322225	-2.94933
ARHGEF4	AT	55356	4.2	NA	NA	0	1	0.8827	0.2206	0.178767	0.439008	3.48284	0.00195487	0.0322225	-2.94946
CCNT2	AD	55408	7.2	7.1	8	0	0.9948	0.8791	0.1536	-0.176129	0.518619	-3.96411	0.000590935	0.0134741	-1.77532
CCNT2	ES	55413	6.1:6.2	5	7.1	0	0.9232	1	0.1613	-0.18834	0.221327	-3.86503	0.000993124	0.0198317	-2.12711
ORC4	AP	55522	1	NA	NA	0	0.9965	0.7266	0.1066	-0.0654217	0.440496	-3.34746	0.00283711	0.0418529	-3.27788
ORC4	AP	55523	2.1	NA	NA	0	0.9965	0.7266	0.1066	0.0654217	0.559504	3.34746	0.00283711	0.0418529	-3.27788
ORC4	AD	55534	2.2	2.1	4	0	0.9564	0.8862	0.0895	0.0696227	0.14967	4.02956	0.000577429	0.0132972	-1.67515
RIF1	ES	55572	31	30	32	0	0.9913	0.7345	0.1235	-0.132525	0.7761	-4.3472	0.000225256	0.00677648	-0.81888
PRPF40A	ES	55608	8	7	9	1	0.9599	0.6419	0.1087	-0.0946	0.839656	-3.59346	0.00174881	0.0297026	-2.72971
BAZ2B	ES	55698	10	9	11	0	0.9703	0.5204	0.1109	-0.0662375	0.864931	-3.29063	0.0031261	0.0445616	-3.40542
LY75	AT	55707	40	NA	NA	0	1	0.7129	0.1422	-0.0883417	0.647192	-3.37273	0.00256001	0.0390155	-3.21177
LY75	AT	55708	35	NA	NA	0	1	0.7129	0.1422	0.0883417	0.352808	3.37273	0.00256001	0.0390155	-3.21177
ITGB6	AD	55713	3.2	3.1	4	0	0.9948	0.2379	0.0278	0.0262333	0.960367	4.13465	0.000384957	0.00998193	-1.35125
COBLL1	ES	55789	8	7	9	0	0.8447	0.424	0.0783	-0.104862	0.138536	-4.76411	0.000109745	0.0039884	0.0316752
NOSTRIN	ES	55836	8	6	9	0	0.9616	0.1089	0.017	0.0193125	0.989735	3.67455	0.00121742	0.0230366	-2.48656
BBS5	AT	55863	17	NA	NA	0	1	0.3552	0.0417	-0.0544292	0.0577438	-4.50896	0.000149725	0.0050257	-0.411733
BBS5	AT	55864	12	NA	NA	0	1	0.3552	0.0417	0.0544292	0.942256	4.50896	0.000149725	0.0050257	-0.411733
KLHL23	AP	55877	1	NA	NA	0	0.9232	0.915	0.172	-0.21814	0.544289	-4.24516	0.000411573	0.0104049	-1.24812
KLHL23	AP	55878	4	NA	NA	0	0.9232	0.915	0.172	0.21814	0.455711	4.24516	0.000411573	0.0104049	-1.24812
DYNC1I2	AP	55938	1	NA	NA	0	1	0.7801	0.1088	0.14385	0.406804	6.02827	3.39755e-06	0.000299162	3.40318
DYNC1I2	AP	55939	2	NA	NA	0	1	0.7801	0.1088	-0.14385	0.593196	-6.02827	3.39755e-06	0.000299162	3.40318
PDK1	RI	55979	14.2	14.1	14.3	0	1	0.4214	0.0746	-0.0681	0.893254	-3.91818	0.00066304	0.01453	-1.88896
CHN1	ES	56052	7	6	8.2	0	0.9494	0.5504	0.0854	0.0312909	0.938135	3.29936	0.00332178	0.0464668	-3.39571
KIAA1715	ES	56102	4	3	5	0	0.7976	1	0.1713	0.254791	0.249445	3.77758	0.00325508	0.0458844	-2.72449
PLEKHA3	ES	56176	3	2	4	0	0.9791	0.6617	0.0874	-0.0871542	0.191219	-4.07022	0.000452696	0.011112	-1.51182
TTN	AT	56177	48	NA	NA	0	0.904	1	0.0638	0.0468895	0.0386	4.17136	0.000538243	0.0126063	-1.46718
TTN	AT	56178	364	NA	NA	0	0.904	1	0.0638	-0.0468895	0.9614	-4.17136	0.000538243	0.0126063	-1.46718
CCDC141	AT	56396	12.2	NA	NA	0	0.986	0.772	0.1675	0.166548	0.126264	5.06305	4.18306e-05	0.00200431	0.909714
CCDC141	AT	56398	24	NA	NA	0	0.986	0.8274	0.1732	-0.164848	0.688596	-3.53578	0.00180037	0.0302389	-2.83449
SSFA2	AP	56438	3	NA	NA	0	1	0.955	0.1335	0.112658	0.213167	3.51304	0.00181494	0.0304369	-2.87704
SSFA2	ES	56442	17	16	18	0	1	0.3615	0.0596	0.0822	0.854467	5.98738	3.75315e-06	0.000326546	3.30217
ORMDL1	AA	56538	2.2:2.3	1	2.4	0	0.9948	0.8542	0.1429	-0.0946227	0.21265	-3.92648	0.000740892	0.0157719	-1.92235
HIBCH	ES	56560	14	13	15	0	1	0.3195	0.054	-0.0440792	0.960494	-3.25437	0.00341315	0.0473829	-3.49039
GLS	AT	56589	20	NA	NA	0	1	0.6244	0.1289	-0.171667	0.381396	-7.01237	3.27771e-07	4.64568e-05	5.78372
GLS	AT	56590	16	NA	NA	0	1	0.6244	0.1289	0.171667	0.618604	7.01237	3.27771e-07	4.64568e-05	5.78372
MYO1B	ES	56607	23	22	24	0	0.9878	1	0.191	0.305787	0.425815	9.43697	2.64355e-09	1.19745e-06	10.7839
MYO1B	ES	56608	23:24:00	22	25	0	1	0.9304	0.1584	0.223483	0.201288	7.39463	1.36489e-07	2.37785e-05	6.67851
ANKRD44	AT	56670	27	NA	NA	0	0.9948	0.9062	0.1757	-0.149188	0.637469	-3.78501	0.000924897	0.0187879	-2.21678
ANKRD44	AT	56671	11.2	NA	NA	0	0.9948	0.9062	0.1664	0.115358	0.301887	3.37838	0.00252493	0.0386957	-3.19837
SPATS2L	ES	56737	10	9	11	0	1	0.596	0.0862	0.101442	0.524092	4.7504	8.13968e-05	0.00327211	0.197808
CLK1	ES	56755	5	4	6	0	1	0.5683	0.0672	0.122987	0.88336	4.53062	0.000141754	0.00483196	-0.357111
CFLAR	AP	56787	2	NA	NA	0	1	0.7681	0.1057	-0.0876833	0.424925	-3.8971	0.000698981	0.0150771	-1.94102
CFLAR	AT	56791	9	NA	NA	0	1	0.7353	0.1356	0.095525	0.265338	4.31144	0.000246529	0.00727467	-0.908683
CFLAR	AT	56794	17	NA	NA	0	1	0.4019	0.081	-0.10765	0.309812	-7.30867	1.65934e-07	2.78275e-05	6.47888
CFLAR	ES	56799	10	8.1	11	0	1	0.7737	0.1507	0.0969917	0.286467	3.86927	0.000749384	0.0159296	-2.00965
CFLAR	ES	56800	3.2	1	5.2	0	0.9983	0.117	0.0147	0.0148875	0.982794	4.32285	0.000239531	0.0071245	-0.880035
CASP10	ES	56809	07:08:00	5	9	0	0.9843	0.3627	0.0565	-0.0369583	0.961817	-3.88958	0.000712249	0.0152583	-1.95956
CASP8	AP	56812	1.1	NA	NA	0	1	0.9755	0.1715	0.178621	0.408835	4.06711	0.00045625	0.0111557	-1.51957
CASP8	ES	56827	9	8	10	0	0.9983	0.8663	0.1152	-0.133767	0.7502	-4.77721	7.60753e-05	0.00313859	0.265563
TMEM237	AP	56846	2	NA	NA	0	0.9599	1	0.1922	0.303685	0.4068	5.87299	1.03542e-05	0.000706435	2.48311
TMEM237	AP	56847	1	NA	NA	0	0.9599	1	0.1922	-0.303685	0.5932	-5.87299	1.03542e-05	0.000706435	2.48311
RAPH1	AT	57075	17	NA	NA	0	1	0.5136	0.0849	-0.0948042	0.76919	-4.28633	0.00026265	0.00762745	-0.971682
RAPH1	AT	57077	16	NA	NA	0	1	0.3044	0.0538	0.0700667	0.0965542	6.71512	6.56197e-07	8.20884e-05	5.07578
EEF1B2	RI	57142	1.2	1.1	1.3	0	0.9983	0.3668	0.0557	-0.0683375	0.895073	-3.9028	0.000689077	0.0149441	-1.92695
EEF1B2	RI	57143	1.2:1.3	1.1	1.4	0	1	0.4371	0.0635	-0.0626875	0.880027	-3.84989	0.000786586	0.016584	-2.05738
MAP2	ES	57225	13	12	14	0	0.8569	0.9217	0.184	0.168582	0.499465	3.62295	0.00216854	0.0346855	-2.75476
KANSL1L	AP	57258	2	NA	NA	0	0.8639	0.9426	0.17	0.221987	0.481929	3.69903	0.00222931	0.0353871	-2.66327
KANSL1L	AP	57259	1	NA	NA	0	0.8639	0.9426	0.17	-0.221987	0.518071	-3.69903	0.00222931	0.0353871	-2.66327
KANSL1L	ES	57262	10	9.1	11	0	0.9005	0.5747	0.0939	-0.0949864	0.936407	-4.43941	0.000213903	0.00658414	-0.685054
FN1	AA	57392	40.1	39	40.2	0	1	0.3077	0.0382	0.0813375	0.841244	7.7251	6.49934e-08	1.472e-05	7.43731
FN1	AA	57393	40.1:40.2:40.3	39	40.4	0	1	0.573	0.0963	0.199712	0.62634	11.6079	3.04954e-11	4.18721e-08	15.306
FN1	AA	57394	40.2:40.3	39	40.4	0	1	0.7279	0.0707	0.0568542	0.253844	3.56835	0.00158356	0.0276215	-2.7439
FN1	ES	57395	40.1:40.2	39	40.4	0	1	0.427	0.0822	0.18315	0.751829	14.0056	6.22429e-13	2.73483e-09	19.3077
FN1	ES	57396	40.2	39	40.4	0	1	0.7557	0.1096	0.108921	0.39444	3.61423	0.00141374	0.0256364	-2.63298
FN1	ES	57397	33	32	34	0	1	0.7842	0.102	0.0651625	0.520098	4.07797	0.000443962	0.0109802	-1.49254
FN1	ES	57398	25	24	26	0	1	0.9102	0.1146	0.214921	0.13759	11.3994	4.39557e-11	5.43069e-08	14.93
RPL37A	AT	57414	5	NA	NA	0	1	0.1777	0.0245	-0.0266625	0.97651	-4.64395	0.00010648	0.00390526	-0.0711181
RPL37A	AT	57415	8	NA	NA	0	1	0.1766	0.0239	0.0255958	0.0223563	4.63315	0.000109422	0.00397994	-0.0983819
TNS1	ES	57434	23	22	25	0	0.9337	0.1587	0.0291	-0.0280826	0.0287319	-4.7459	9.13207e-05	0.00355713	0.124465
CCDC108	AT	57577	12.2	NA	NA	0	0.7993	0.908	0.1915	-0.306386	0.272317	-5.23118	0.000139234	0.00476453	0.251352
CCDC108	AT	57579	34	NA	NA	0	0.7993	1	0.234	0.322936	0.659554	4.91054	0.000248929	0.0073209	-0.349843
FAM134A	AA	57615	4.1	3	4.2	0	0.9983	0.2772	0.027	0.0267792	0.940206	4.88266	5.83225e-05	0.00255491	0.532103
GMPPA	AD	57715	1.2:1.3	1.1	2.2	0	0.9983	1	0.1326	0.160652	0.424417	4.28194	0.00028772	0.00822042	-1.02316
AP1S3	AT	57757	8	NA	NA	0	1	0.514	0.0625	-0.0430875	0.150815	-4.00529	0.000532918	0.0125076	-1.67322
RHBDD1	ES	57793	02:03:00	1	4	0	0.9634	0.9583	0.1741	0.189213	0.36323	4.96374	5.33876e-05	0.0023877	0.664016
MFF	ES	57803	08:09:00	7	10	0	1	0.6777	0.1049	0.0784375	0.772415	4.33088	0.000234727	0.0069969	-0.859874
MFF	ES	57808	10	7	11	0	1	0.5945	0.0714	-0.0392708	0.136365	-3.94469	0.000620425	0.0138941	-1.82341
MFF	ES	57813	03:04:05	1	6	0	0.9983	1	0.2046	0.134683	0.382633	3.33668	0.00279513	0.0414767	-3.29702
MFF	ES	57816	03:04:00	1	5	0	0.9808	0.9772	0.2096	0.172413	0.353445	3.92012	0.000703089	0.0151285	-1.90982
TRIP12	AA	57848	19.1	18	19.2	0	0.9825	0.4225	0.0736	-0.0544542	0.887465	-3.2449	0.00349225	0.0480558	-3.51253
TRIP12	ES	57856	3	2	4.1	0	0.9738	0.7643	0.1162	0.109608	0.570621	3.91632	0.000666134	0.0145833	-1.89355
SP110	ES	57867	11.1:11.2	10	12	0	1	0.169	0.0269	0.0250958	0.955823	3.68196	0.00119523	0.0227932	-2.46853
SP140	AT	57869	4	NA	NA	0	0.9983	0.6284	0.0952	-0.128633	0.286325	-7.35182	1.50417e-07	2.54634e-05	6.57921
SP140L	AP	57884	3	NA	NA	0	0.9965	1	0.2207	0.345012	0.324331	6.05641	3.17293e-06	0.00028588	3.47262
SP140L	AP	57885	1	NA	NA	0	0.9965	1	0.2207	-0.345012	0.675669	-6.05641	3.17293e-06	0.00028588	3.47262
SP100	AT	57895	34	NA	NA	0	1	0.4628	0.0729	-0.0815583	0.205204	-5.04425	3.8847e-05	0.00189651	0.9404
SP100	AT	57897	29	NA	NA	0	1	0.5166	0.0415	0.0306792	0.14789	4.36753	0.000213987	0.00658414	-0.767784
PTMA	AA	57933	5.1	4	5.2	0	1	0.1032	0.0074	-0.00540833	0.0841042	-4.78042	7.54623e-05	0.00311916	0.273673
DIS3L2	RI	57984	24.2	24.1	24.3	0	0.9459	0.89	0.1827	0.167981	0.688516	3.4912	0.0022229	0.0353492	-2.96535
EIF4E2	AT	57999	9	NA	NA	0	1	0.5205	0.1058	-0.147321	0.337244	-7.77556	5.81063e-08	1.36528e-05	7.55194
EIF4E2	AT	58000	7	NA	NA	0	1	0.7395	0.1204	0.124508	0.601925	4.6563	0.00010321	0.00385943	-0.0399139
GIGYF2	ES	58026	2	1	3.2	0	0.9529	0.97	0.1483	0.130055	0.355461	3.39088	0.00267537	0.0400922	-3.18499
ATG16L1	ES	58038	8	7	10	0	0.993	0.9146	0.1669	-0.142158	0.629604	-3.57177	0.00157025	0.0274715	-2.73565
COL6A3	ES	58104	6	5	7	0	0.9825	0.964	0.1657	0.319096	0.347823	8.16951	3.38705e-08	9.07441e-06	8.16374
COL6A3	ES	58107	3	2	4	0	0.9023	0.979	0.1961	-0.215291	0.722891	-6.39227	1.72975e-06	0.000175119	4.14002
COL6A3	ES	58108	03:04:00	2	5	0	0.9791	1	0.1387	-0.224387	0.361119	-6.39459	1.72042e-06	0.000174577	4.14553
MLPH	ES	58113	14	13	15	0	0.9948	0.793	0.1136	0.080975	0.0924625	3.2842	0.00317523	0.045077	-3.42051
MLPH	ES	58115	10	9	11	0	0.9965	0.8697	0.0957	-0.0662792	0.253194	-4.05465	0.000470765	0.0113864	-1.55057
LRRFIP1	AP	58128	1	NA	NA	0	0.9703	0.8011	0.1551	0.126545	0.316409	3.48455	0.00214147	0.0344532	-2.96756
LRRFIP1	AP	58129	2	NA	NA	0	0.9703	0.8011	0.1551	-0.126545	0.683591	-3.48455	0.00214147	0.0344532	-2.96756
LRRFIP1	AT	58130	26	NA	NA	0	1	0.6624	0.093	-0.0852583	0.206725	-5.40717	1.5676e-05	0.000960628	1.855
LRRFIP1	AT	58131	21	NA	NA	0	1	0.6624	0.093	0.0852583	0.793275	5.40717	1.5676e-05	0.000960628	1.855
LRRFIP1	ES	58133	15	14	16	0	0.9913	0.4483	0.0485	-0.0409417	0.101571	-3.30315	0.00303256	0.0436602	-3.37601
RAMP1	AP	58148	1	NA	NA	0	0.9878	0.6341	0.1123	0.120681	0.0958733	4.09484	0.000534627	0.0125349	-1.55582
RAMP1	AP	58149	2	NA	NA	0	0.9878	0.6554	0.1143	-0.124138	0.894136	-4.32618	0.000308904	0.00867816	-1.00797
SCLY	AT	58198	13	NA	NA	0	1	0.9177	0.1214	-0.129062	0.826935	-3.25094	0.00344164	0.0475934	-3.49842
SCLY	AT	58199	9.2	NA	NA	0	1	0.9177	0.1214	0.129062	0.173065	3.25094	0.00344164	0.0475934	-3.49842
HDAC4	AT	58232	29	NA	NA	0	1	0.4977	0.0921	-0.0792083	0.920792	-3.55787	0.00162507	0.0281222	-2.76918
HDAC4	AT	58233	19.2	NA	NA	0	1	0.4977	0.0921	0.0792083	0.0792083	3.55787	0.00162507	0.0281222	-2.76918
CAPN10	AT	58267	15	NA	NA	0	1	0.6014	0.1043	0.110963	0.0873979	3.67086	0.00122862	0.0232086	-2.49554
CAPN10	AT	58269	13	NA	NA	0	1	0.6014	0.1043	-0.110963	0.912602	-3.67086	0.00122862	0.0232086	-2.49554
GPR35	AP	58298	6	NA	NA	0	0.8168	1	0.2758	-0.39947	0.4352	-4.27842	0.00176591	0.0297968	-1.97422
MTERFD2	ES	58318	2	1	3.1	0	1	0.5972	0.079	0.108071	0.79984	5.69785	7.6306e-06	0.000575083	2.58296
FARP2	AT	58380	18.2	NA	NA	0	1	0.8975	0.1555	0.169288	0.371948	4.71156	8.97749e-05	0.00351249	0.0996775
FARP2	AT	58381	28	NA	NA	0	1	0.8975	0.1555	-0.169288	0.628052	-4.71156	8.97749e-05	0.00351249	0.0996775
THAP4	AP	58391	1	NA	NA	0	0.9965	0.9514	0.2199	0.237948	0.449436	4.51341	0.000162243	0.00535184	-0.451351
THAP4	AP	58392	3	NA	NA	0	0.9965	0.9514	0.2199	-0.237952	0.550566	-4.51345	0.000162229	0.00535184	-0.451261
D2HGDH	RI	58415	7.2	7.1	7.3	0	0.9476	1	0.1157	0.0730304	0.91062	3.29177	0.00324229	0.0457775	-3.40747
D2HGDH	ES	58423	7.1:7.3	6	8	0	0.8639	1	0.2045	-0.244442	0.197306	-3.93023	0.00212233	0.0342456	-2.38061
C20orf96	AP	58435	2.1	NA	NA	0	0.9965	0.857	0.1715	0.184609	0.757902	3.42924	0.00233006	0.0363947	-3.08627
C20orf96	AP	58436	1	NA	NA	0	0.9965	0.857	0.1715	-0.184609	0.242098	-3.42924	0.00233006	0.0363947	-3.08627
C20orf96	AT	58437	9.2	NA	NA	0	0.9983	0.9526	0.1394	0.145025	0.197937	3.52941	0.0017432	0.0296527	-2.8377
C20orf96	AT	58438	11	NA	NA	0	0.9983	0.9526	0.1394	-0.145021	0.80206	-3.52956	0.00174257	0.0296527	-2.83734
RBCK1	AT	58450	3	NA	NA	0	1	0.6268	0.1171	0.167579	0.41791	10.4223	2.60327e-10	1.87513e-07	13.1012
RBCK1	AT	58451	13	NA	NA	0	1	0.6268	0.1171	-0.167579	0.58209	-10.4223	2.60327e-10	1.87513e-07	13.1012
CSNK2A1	ES	58461	02:03:00	1	4	0	0.9721	0.7619	0.1166	0.100562	0.850748	3.55994	0.00161677	0.0280339	-2.76418
PSMF1	AA	58475	8.1	7	8.2	0	1	0.3079	0.0516	0.109458	0.836396	7.97205	3.76864e-08	9.74038e-06	7.99517
SNRPB	AA	58542	8.1	7.1	8.2	0	1	0.3933	0.0625	-0.0688625	0.869702	-5.20935	2.56813e-05	0.00140346	1.35706
IDH3B	AA	58549	12.1	11	12.2	0	1	0.0629	0.0083	-0.0078875	0.991781	-3.37762	0.00252962	0.038727	-3.20018
PCED1A	AP	58556	1	NA	NA	0	0.9895	0.7738	0.1158	0.106855	0.167322	3.51413	0.00199567	0.032743	-2.89854
PCED1A	AP	58557	2	NA	NA	0	0.9895	0.7738	0.1158	-0.106859	0.83268	-3.51441	0.00199435	0.032743	-2.89789
PANK2	AD	58614	3.2	3.1	4	0	1	0.4527	0.0684	-0.0559042	0.739465	-3.88928	0.000712787	0.0152624	-1.96031
TMEM230	AD	58646	1.2:1.3	1.1	4	0	1	0.6923	0.0788	0.099375	0.204475	4.84199	6.46149e-05	0.00276072	0.429291
PLCB1	AT	58672	33	NA	NA	0	1	0.3585	0.0425	-0.0328708	0.977873	-3.92365	0.000654016	0.0143969	-1.87544
PLCB1	AT	58673	32.2	NA	NA	0	1	0.3585	0.0425	0.0328708	0.0221271	3.92365	0.000654016	0.0143969	-1.87544
MACROD2	AP	58714	6	NA	NA	0	0.9808	0.9282	0.2572	-0.281045	0.513074	-6.41996	2.01084e-06	0.000198099	4.04081
MACROD2	AP	58715	15	NA	NA	0	0.9808	0.9315	0.2372	0.257264	0.446507	6.44143	1.91582e-06	0.000190447	4.09023
KIF16B	AT	58720	27	NA	NA	0	1	0.7548	0.1336	-0.106208	0.828137	-5.01541	4.17652e-05	0.00200431	0.867561
KIF16B	AT	58721	23	NA	NA	0	1	0.7548	0.1336	0.106208	0.171863	5.01541	4.17652e-05	0.00200431	0.867561
RRBP1	ES	58743	2	1	3.1	0	0.9983	0.5479	0.0937	-0.106008	0.592867	-4.64578	0.000105987	0.0038937	-0.0664817
SNX5	AT	58744	13	NA	NA	0	1	0.3781	0.053	-0.0698583	0.941362	-4.68632	9.56797e-05	0.00365881	0.0359009
SNX5	AT	58745	1.7	NA	NA	0	1	0.3781	0.053	0.0698625	0.0586396	4.68652	9.563e-05	0.00365881	0.036421
SNX5	RI	58751	1.2	1.1	1.3	0	0.9808	0.8476	0.1852	-0.287782	0.691352	-6.22015	3.16371e-06	0.00028588	3.57833
APMAP	ES	58855	8	7	9	0	1	0.161	0.0205	0.0379583	0.957454	6.53533	1.00384e-06	0.000111946	4.64271
ABHD12	ES	58873	3	2	4	0	1	0.134	0.026	0.0259792	0.0289063	4.3468	0.000225482	0.00677648	-0.819879
FRG1B	ES	58883	04:05:00	3	6	1	0.8901	0.9562	0.2193	0.171195	0.427151	3.70218	0.0013539	0.0248072	-2.47748
FRG1B	ES	58884	5	3	6	1	0.911	0.576	0.0876	0.0632286	0.862798	5.50288	1.96878e-05	0.00114603	1.77121
HM13	ES	58893	00:11:12.100000	10	13	1	0.9599	0.8341	0.186	-0.192879	0.55984	-4.15272	0.000561397	0.0130197	-1.50941
RALY	ES	59017	5	4	6	0	1	0.2926	0.0469	0.0674458	0.816252	7.5073	1.05812e-07	1.97689e-05	6.93878
NCOA6	AP	59034	1	NA	NA	0	1	0.7958	0.1801	0.195892	0.329746	3.57702	0.00155003	0.0272421	-2.72299
NCOA6	AP	59035	2	NA	NA	0	1	0.7958	0.1801	-0.195892	0.670254	-3.57702	0.00155003	0.0272421	-2.72299
ACSS2	AP	59036	1.1	NA	NA	0	0.9389	0.9495	0.1671	-0.153557	0.192878	-3.61493	0.0016627	0.0286743	-2.68002
ACSS2	AP	59037	2.1	NA	NA	0	0.9389	0.9495	0.1671	0.153557	0.807122	3.61493	0.0016627	0.0286743	-2.68002
[truncated: 1,242 more rows]

## Sheet: DEAS_FEMALE_LUAD
symbol	splice_type	as_id	exons	from_exon	to_exon	novel_splice	pct_with_values	psi_range	std_psi	logFC	AveExpr	t	P.Value	adj.P.Val	B
C1orf159	RI	12	11.2	11.1	11.3	0	0.9529	0.8341	0.1524	0.183543	0.732271	3.44313	0.00225224	0.0228224	-3.21802
UBE2J2	ES	48	6.1	5	7	0	0.9983	0.2947	0.0429	0.046825	0.0401969	5.80968	1.96513e-06	8.65365e-05	3.48194
CPSF3L	AA	80	11.1	10	11.2	0	1	0.5464	0.0797	0.0429061	0.107547	3.12589	0.00371117	0.0331364	-3.96881
CPSF3L	AA	84	6.1	5.2	6.2	0	1	0.1931	0.0185	0.0118576	0.973653	2.93022	0.00614057	0.0480616	-4.44511
CPSF3L	AA	98	5.1	4	5.2	0	0.9983	0.5178	0.0708	0.0448156	0.0514923	5.27204	9.30566e-06	0.0003057	1.92484
DVL1	AD	141	11.2	11.1	12	0	0.9878	0.8944	0.1676	0.220847	0.414303	7.50501	1.63747e-08	1.72574e-06	8.31391
AURKAIP1	AD	151	1.2:1.3	1.1	1.5	0	0.9825	0.4694	0.0583	0.0307387	0.159298	3.60846	0.00108307	0.0131925	-2.74091
ANKRD65	RI	170	1.2	1.1	1.3	0	0.897	0.8799	0.1664	0.153286	0.418451	5.81541	3.16439e-06	0.000127938	3.14215
SSU72	AT	179	2.2	NA	NA	0	1	0.454	0.0488	-0.0369848	0.0906258	-4.53157	7.43701e-05	0.00163666	-0.167855
SSU72	AT	180	5	NA	NA	0	1	0.454	0.0488	0.0369848	0.909374	4.53157	7.43701e-05	0.00163666	-0.167855
MIB2	AP	184	3.1	NA	NA	0	0.9773	0.3526	0.0591	0.0557677	0.0534141	3.80657	0.000632346	0.00878052	-2.2179
CDK11B	AP	204	1	NA	NA	0	1	0.2228	0.0295	0.0213212	0.955558	2.92287	0.00625604	0.0486448	-4.46264
CDK11B	AP	205	2	NA	NA	0	1	0.2228	0.0295	-0.0213242	0.0444439	-2.92356	0.00624509	0.0486211	-4.46099
CDK11A	ES	221	2.4	2.2	3	0	0.9965	0.5093	0.0999	-0.0876879	0.265038	-4.18467	0.000201983	0.00355638	-1.1516
SLC35E2	AT	222	8	NA	NA	0	1	0.8176	0.1584	-0.0938636	0.535541	-3.53798	0.00123447	0.0145166	-2.91435
SLC35E2	AT	223	7	NA	NA	0	1	0.8176	0.1584	0.0938667	0.464461	3.53818	0.00123381	0.0145166	-2.91384
NADK	AP	227	2	NA	NA	0	0.9983	0.3594	0.0484	0.0339303	0.0315318	3.19511	0.00309582	0.0289232	-3.7963
GNB1	ES	231	2	1	3	1	0.9686	0.1534	0.0238	-0.0190933	0.938229	-3.72973	0.000809188	0.0105478	-2.4324
C1orf86	AT	246	7.2	NA	NA	0	1	0.6293	0.084	0.109642	0.577682	6.60686	1.72746e-07	1.16858e-05	5.89603
C1orf86	AT	247	10	NA	NA	0	1	0.6293	0.084	-0.109639	0.422317	-6.60668	1.72835e-07	1.16858e-05	5.89551
C1orf86	ES	248	6:7.1:8:9	5	10	0	0.9232	1	0.159	-0.140341	0.227874	-4.31224	0.000174214	0.00317033	-0.897508
C1orf86	ES	249	7.1:8:9	5	10	0	0.9337	1	0.1842	-0.14295	0.323356	-3.21065	0.00317947	0.0295104	-3.75396
MORN1	AT	252	8	NA	NA	0	0.9616	1	0.2113	0.196197	0.219453	5.51463	4.18278e-06	0.000159293	2.69436
MORN1	AT	253	17	NA	NA	0	0.9616	1	0.2296	-0.24667	0.593444	-6.03211	9.17376e-07	4.72648e-05	4.21534
FAM213B	AA	290	6.1	5	6.2	0	0.9773	0.6584	0.0854	-0.0624969	0.620957	-3.11462	0.0038968	0.0343475	-3.99377
MEGF6	AP	311	1	NA	NA	0	0.8726	0.953	0.2376	-0.1876	0.358432	-4.35452	0.000130682	0.00253982	-0.697891
MEGF6	AP	312	6	NA	NA	0	0.8726	0.953	0.2376	0.1876	0.641568	4.35452	0.000130682	0.00253982	-0.697891
MEGF6	ES	315	31	30	32	0	0.9616	0.8824	0.1676	-0.185997	0.761462	-5.90443	1.33278e-06	6.39443e-05	3.8403
WRAP73	RI	320	11.2	11.1	11.3	0	0.9965	0.8862	0.1205	0.0742879	0.332386	3.1258	0.00371198	0.0331364	-3.96902
KCNAB2	AP	360	2	NA	NA	0	0.9791	1	0.1326	0.119206	0.143669	2.92801	0.00627533	0.0487689	-4.44475
KCNAB2	AP	361	3	NA	NA	0	0.9791	1	0.1543	-0.142769	0.821355	-3.26685	0.0026196	0.0255552	-3.61501
KCNAB2	RI	367	22.2	22.1	22.3	0	0.993	1	0.1264	0.0479062	0.0902215	3.65283	0.000929576	0.0117293	-2.61692
RPL22	AP	378	1	NA	NA	0	1	0.0527	0.0057	0.00223333	0.00217727	3.97085	0.000370787	0.00578412	-1.7463
RPL22	AP	379	2	NA	NA	0	1	0.0527	0.0057	-0.00223333	0.997823	-3.96584	0.000376061	0.00583013	-1.7601
ICMT	ES	385	03:04:00	2	5	0	0.9983	0.6149	0.1091	0.0956424	0.785545	3.39487	0.00181938	0.0194592	-3.28774
ICMT	ES	387	3	2	4	0	0.9983	0.6145	0.082	0.0654121	0.230276	3.49406	0.00139133	0.0158904	-3.0297
ACOT7	AP	390	4	NA	NA	0	0.9948	0.7777	0.175	-0.253531	0.338492	-6.64982	1.77684e-07	1.19219e-05	5.90172
ACOT7	AP	391	2	NA	NA	0	0.9948	0.9549	0.2152	0.265975	0.229378	6.59329	2.08534e-07	1.35371e-05	5.74012
ACOT7	ES	395	12.1:12.2	11	13	0	0.986	0.0548	0.0079	-0.0111531	0.00739692	-4.21489	0.000194255	0.00344593	-1.08804
CAMTA1	AT	501	26	NA	NA	0	1	0.3061	0.0436	-0.0391788	0.0791439	-5.37353	6.33205e-06	0.000225329	2.27993
ERRFI1	RI	533	3.3	3.2	3.4	0	1	0.8891	0.179	0.0984212	0.251444	2.90952	0.00647118	0.0498852	-4.49445
TMEM201	AT	564	11	NA	NA	0	1	0.6964	0.119	0.126682	0.47145	6.51462	2.25486e-07	1.44667e-05	5.62743
TMEM201	AT	565	6.2	NA	NA	0	1	0.6964	0.119	-0.126682	0.52855	-6.51462	2.25486e-07	1.44667e-05	5.62743
CLSTN1	ES	575	11	10	12	0	0.9983	0.9011	0.1633	-0.20897	0.387545	-6.65601	1.49926e-07	1.04586e-05	6.03892
CLSTN1	ES	576	3	2	4	0	0.9773	0.7799	0.1224	-0.213052	0.27628	-7.92558	4.18535e-09	5.9144e-07	9.65931
CTNNBIP1	AP	577	1	NA	NA	0	0.9948	1	0.1948	-0.154958	0.617594	-4.4409	9.66934e-05	0.00200542	-0.426909
CTNNBIP1	AP	580	4	NA	NA	0	0.9948	0.6562	0.1276	0.0949273	0.0577758	4.16545	0.000213379	0.00371389	-1.20545
LZIC	AP	586	1	NA	NA	0	0.993	0.7311	0.1258	-0.157064	0.490677	-5.30596	7.72294e-06	0.000263685	2.08167
LZIC	AP	587	2	NA	NA	0	0.993	0.7311	0.1258	0.157064	0.509323	5.30596	7.72294e-06	0.000263685	2.08167
CASZ1	AT	621	16.2	NA	NA	0	1	0.9065	0.1391	0.0969091	0.392106	3.7623	0.000665253	0.0091108	-2.31571
CASZ1	AT	622	21	NA	NA	0	1	0.9065	0.1391	-0.0969061	0.607892	-3.76202	0.000665772	0.00911323	-2.31647
FBXO44	ES	660	3.1:3.2	2	4	0	0.9651	0.9654	0.1527	0.0891161	0.249072	3.58837	0.00114329	0.0137508	-2.79333
MAD2L2	ES	665	02:03:00	1	4	0	0.9878	0.9111	0.1814	-0.208716	0.875652	-5.17641	1.22745e-05	0.000385866	1.64847
AGTRAP	ES	677	00:03:04.200000	1	5	0	0.9372	0.4131	0.067	-0.0583667	0.954271	-4.1845	0.000233948	0.00402138	-1.21716
AGTRAP	ES	679	3	1	5	0	0.9965	0.0694	0.0074	-0.00490312	0.995249	-2.92718	0.00628845	0.0488536	-4.44672
CLCN6	AT	686	24	NA	NA	0	1	0.6565	0.0776	-0.0806697	0.712756	-4.14743	0.00022464	0.00388833	-1.25588
CLCN6	AT	687	23.2	NA	NA	0	1	0.0919	0.0143	0.00869697	0.0105818	3.0977	0.00399366	0.0349255	-4.03847
CLCN6	AT	688	6	NA	NA	0	1	0.6022	0.0741	0.0719848	0.276659	3.82437	0.000559527	0.0079838	-2.14744
PDPN	AP	710	1.1	NA	NA	0	0.9913	0.7067	0.0677	0.0181094	0.971722	2.92584	0.00630971	0.0489746	-4.4499
PDPN	AP	711	2	NA	NA	0	0.9913	0.6202	0.0354	-0.0251656	0.0176554	-5.15713	1.29793e-05	0.000403978	1.59278
PRDM2	AT	721	11	NA	NA	0	1	0.4276	0.0809	0.104373	0.750974	7.24791	2.7684e-08	2.62777e-06	7.74548
PRDM2	AT	722	13	NA	NA	0	1	0.4276	0.0809	-0.104373	0.249026	-7.24791	2.7684e-08	2.62777e-06	7.74548
PRDM2	ES	724	08:09:10	7	12	0	0.8255	1	0.3277	-0.238058	0.666407	-3.07737	0.00521984	0.0427125	-4.06478
TMEM51	AP	736	2	NA	NA	0	0.9791	0.8626	0.161	-0.113548	0.412468	-3.77754	0.00063762	0.00883664	-2.27449
TMEM51	AP	737	1	NA	NA	0	0.9791	0.8626	0.161	0.113548	0.587532	3.77754	0.00063762	0.00883664	-2.27449
FHAD1	AT	747	15.2	NA	NA	0	0.9948	0.8761	0.2194	0.203182	0.202112	4.84323	3.00037e-05	0.000792905	0.730887
FHAD1	AT	749	36	NA	NA	0	0.9948	0.8761	0.2226	-0.190961	0.777305	-4.17986	0.000204779	0.00359842	-1.16509
PLEKHM2	ES	767	7	6	8	0	0.9965	0.75	0.119	-0.108842	0.820127	-5.30907	7.65266e-06	0.000261931	2.0908
FBLIM1	AP	769	3	NA	NA	0	0.9389	1	0.2919	-0.242267	0.555776	-3.26861	0.00273789	0.0263928	-3.61074
FBLIM1	AP	771	1	NA	NA	0	0.9389	1	0.3021	0.216267	0.398033	2.93291	0.00642012	0.0496309	-4.42214
FBLIM1	AT	772	11	NA	NA	0	1	0.5112	0.0745	0.0487545	0.755053	3.07062	0.00428427	0.0368464	-4.10508
FBLIM1	AT	773	9.2	NA	NA	0	1	0.5112	0.0745	-0.0487606	0.244947	-3.07102	0.00427978	0.0368248	-4.10409
HSPB7	AP	785	1	NA	NA	0	0.8726	0.7447	0.1736	0.140693	0.108295	3.78867	0.000750541	0.00992168	-2.30412
HSPB7	AP	786	2.1	NA	NA	0	0.8726	0.7447	0.1736	-0.140693	0.891705	-3.78867	0.000750541	0.00992168	-2.30412
ATP13A2	ES	841	22	21	23	0	0.9965	0.1214	0.0144	0.0212656	0.978718	3.79568	0.000627854	0.00872946	-2.23573
PADI4	AT	851	17	NA	NA	0	0.993	0.903	0.1974	-0.261037	0.351632	-7.44935	1.90784e-08	1.95445e-06	8.15903
PADI4	AT	852	4	NA	NA	0	0.993	0.903	0.1974	0.261037	0.648368	7.44935	1.90784e-08	1.95445e-06	8.15903
ARHGEF10L	AP	855	1	NA	NA	0	0.8709	1	0.2225	0.218133	0.347497	4.71195	6.8148e-05	0.00153039	0.0987189
ARHGEF10L	AP	858	10	NA	NA	0	0.8709	1	0.2327	-0.226026	0.625246	-5.30434	1.40328e-05	0.000430667	1.68088
ARHGEF10L	ES	862	18	17	19	0	0.9442	0.9133	0.1708	0.1821	0.652964	5.20573	1.23094e-05	0.000386514	1.6758
UBR4	AP	872	74.1	NA	NA	0	1	0.8793	0.1152	-0.150806	0.344018	-5.4131	5.6369e-06	0.000204061	2.3961
CAPZB	ES	906	11	10	12	0	1	0.1389	0.0171	-0.0380818	0.0325621	-11.2366	9.39685e-13	5.98511e-10	18.2115
VWA5B1	AT	923	15	NA	NA	0	1	0.6866	0.0901	0.0705121	0.943795	4.66572	5.03631e-05	0.00119794	0.217552
VWA5B1	AT	924	24	NA	NA	0	1	0.4659	0.0624	-0.0456727	0.040997	-5.1065	1.38733e-05	0.000426666	1.4977
HP1BP3	AP	936	1	NA	NA	0	1	0.6947	0.1457	-0.0800152	0.337132	-2.98927	0.00528239	0.0430866	-4.30319
HP1BP3	AP	937	7.1	NA	NA	0	1	0.7743	0.1674	0.0924242	0.582361	3.11736	0.00379462	0.0336707	-3.98993
HP1BP3	AT	939	6	NA	NA	0	1	0.4489	0.0469	0.0310515	0.0441561	4.09739	0.000259052	0.00435199	-1.39556
HP1BP3	AT	940	15	NA	NA	0	1	0.4489	0.0469	-0.0310515	0.955844	-4.09739	0.000259052	0.00435199	-1.39556
ECE1	AP	961	1	NA	NA	0	0.9878	0.9514	0.1529	0.141825	0.4954	4.4664	9.4971e-05	0.00197492	-0.382989
ECE1	AP	962	3.1	NA	NA	0	0.9878	0.5902	0.0581	-0.0496281	0.129715	-3.83777	0.00055885	0.00798011	-2.12235
ECE1	AP	964	4.1	NA	NA	0	0.9878	0.7226	0.0876	-0.095225	0.166172	-4.65344	5.55565e-05	0.0013001	0.147322
RAP1GAP	AA	983	26.1:26.2	25.2	26.3	0	0.8935	0.7273	0.1074	-0.0957962	0.682136	-3.3062	0.00280007	0.0268392	-3.52573
RAP1GAP	AA	990	22.1:22.2:22.3	21	22.4	0	0.9634	0.4305	0.068	-0.02978	0.0547794	-3.77704	0.000712268	0.00954183	-2.3081
RAP1GAP	ES	992	22.1	21	22.4	0	0.9476	0.3838	0.0593	-0.0657833	0.0974317	-6.78207	1.71152e-07	1.1627e-05	6.01301
EPHB2	RI	1026	17.2	17.1	17.3	0	0.9983	0.9802	0.1789	-0.193167	0.271271	-6.94715	6.50467e-08	5.21656e-06	6.88187
C1orf213	RI	1055	1.3	1.2	1.4	0	1	0.7355	0.1344	0.146055	0.885303	3.87045	0.000491811	0.00719271	-2.02184
C1orf213	RI	1056	1.2:1.3	1.1	1.4	0	1	0.8277	0.1369	0.154912	0.834659	3.1056	0.00391251	0.0344514	-4.01898
ASAP3	AD	1066	21.2	21.1	22	0	0.8796	0.5382	0.085	0.0578115	0.111927	3.26014	0.00313986	0.0292538	-3.63621
HMGCL	AP	1078	1	NA	NA	0	0.9983	0.3715	0.0405	0.0138125	0.0129631	3.06478	0.00443083	0.0377669	-4.11572
HMGCL	AP	1079	3	NA	NA	0	0.9983	0.3715	0.0405	-0.0138156	0.987038	-3.06569	0.00442043	0.0377075	-4.11349
STPG1	ES	1106	4	3.2	5	0	0.9843	0.6765	0.1381	0.0556182	0.910585	3.28061	0.00246953	0.0243978	-3.58053
NIPAL3	AT	1109	14	NA	NA	0	1	0.8008	0.1296	0.145703	0.197318	8.8172	3.78975e-10	9.05174e-08	12.0986
NIPAL3	AT	1111	15	NA	NA	0	1	0.7972	0.1319	-0.152576	0.79407	-9.02653	2.18816e-10	5.72412e-08	12.6572
MTFR1L	AP	1197	3.1	NA	NA	0	1	0.2885	0.0531	0.0267848	0.0530682	3.53634	0.00124004	0.0145598	-2.9187
MTFR1L	AP	1198	1	NA	NA	0	1	0.865	0.158	-0.0971394	0.621606	-3.88784	0.000468392	0.00691232	-1.9743
MTFR1L	ES	1213	6	4.2	7.2	0	0.9965	0.7339	0.1107	0.0574594	0.100014	3.17671	0.003317	0.0305353	-3.84042
ZNF593	RI	1230	2.2	2.1	2.3	0	0.993	0.1295	0.0102	-0.00813125	0.00945692	-3.04581	0.00465175	0.039074	-4.16185
UBXN11	ES	1256	4:5:6:7:8:9	2	10	0	0.993	0.8254	0.1139	-0.0685935	0.925713	-3.91153	0.000474053	0.00697759	-1.93671
UBXN11	ES	1259	4:5:7:8:9	2	10	0	0.9913	0.6224	0.0847	-0.059475	0.937283	-4.02112	0.00033528	0.00534072	-1.62339
RPS6KA1	AP	1280	1	NA	NA	0	0.9983	0.9266	0.1957	0.161391	0.438838	4.39852	0.000109285	0.00221025	-0.547582
RPS6KA1	AP	1281	7	NA	NA	0	0.9983	0.8855	0.1796	-0.150936	0.416141	-4.83562	3.06781e-05	0.000807813	0.708829
SYTL1	AP	1320	1	NA	NA	0	0.9965	1	0.1257	-0.0798727	0.890855	-3.2428	0.0027299	0.0263331	-3.67631
SYTL1	AP	1321	2.1	NA	NA	0	0.9965	1	0.1257	0.0798727	0.109145	3.2428	0.0027299	0.0263331	-3.67631
AHDC1	ES	1331	00:03:04.100000	2	4.2	0	0.822	1	0.2284	0.181327	0.478362	3.45529	0.00364983	0.0327286	-3.32141
PPP1R8	AD	1347	1.2:1.3	1.1	2	0	0.9913	0.7962	0.0848	0.0444312	0.104152	3.17333	0.00334631	0.030683	-3.84881
SMPDL3B	AT	1360	7.2	NA	NA	0	1	0.5541	0.0948	0.0525636	0.184361	3.15323	0.00345532	0.031349	-3.9009
SMPDL3B	AT	1361	8	NA	NA	0	1	0.5541	0.0948	-0.0525636	0.815639	-3.15323	0.00345532	0.031349	-3.9009
RCC1	AP	1386	1	NA	NA	0	1	0.8375	0.1532	-0.163785	0.730708	-4.77926	3.61686e-05	0.000924149	0.545524
RCC1	AP	1387	5	NA	NA	0	1	0.8375	0.1532	0.163785	0.269292	4.77926	3.61686e-05	0.000924149	0.545524
RCC1	ES	1388	7	6	8	0	0.9913	0.9716	0.1241	-0.127481	0.360597	-4.13385	0.000244232	0.00417159	-1.31288
EPB41	ES	1410	16:17:18	15	19.1	0	0.7522	1	0.1907	-0.127818	0.213643	-3.16505	0.00455133	0.0384831	-3.86608
EPB41	ES	1411	16:18:00	15	19.1	0	0.8691	1	0.2651	0.348827	0.266124	5.43041	1.1347e-05	0.000361099	1.9336
EPB41	ES	1412	18	15	19.1	0	0.9284	1	0.2294	0.210928	0.418511	4.81502	4.36952e-05	0.0010675	0.474897
SERINC2	AP	1469	3	NA	NA	0	0.993	1	0.098	-0.0478188	0.939351	-3.03929	0.00473008	0.0396108	-4.17767
SERINC2	AP	1471	4	NA	NA	0	0.993	1	0.0902	0.0480469	0.0598969	3.06191	0.00446353	0.0379132	-4.12269
COL16A1	ES	1493	44	43	45.1	0	0.9302	1	0.2144	0.425914	0.420408	10.8279	1.90234e-11	7.74113e-09	15.3915
PTP4A2	ES	1532	5	3	6	0	1	0.0109	0.0019	-0.00203333	0.00192273	-3.16683	0.00333447	0.0306294	-3.86702
PTP4A2	ES	1536	03:05:00	2	6	0	0.9913	0.2897	0.0375	-0.043075	0.0364277	-3.84382	0.000549561	0.00787998	-2.10602
TXLNA	AP	1558	1	NA	NA	0	0.9878	0.9349	0.1156	-0.0743515	0.656009	-3.17458	0.00326739	0.0301503	-3.84768
TXLNA	AP	1559	2.1	NA	NA	0	0.9878	0.9349	0.1156	0.0743545	0.343989	3.17473	0.00326612	0.0301503	-3.84731
TMEM234	AT	1567	5.9	NA	NA	0	1	0.7103	0.1257	-0.17617	0.380776	-5.3597	6.59467e-06	0.000232602	2.23934
TMEM234	AT	1568	7	NA	NA	0	1	0.7103	0.1257	0.17617	0.619224	5.3597	6.59467e-06	0.000232602	2.23934
BSDC1	AA	1598	4.1:4.2	3	4.3	0	0.9529	0.4105	0.0804	0.0833667	0.879777	3.50336	0.00148093	0.0165735	-3.01892
BSDC1	AA	1599	4.2	3	4.3	0	1	0.183	0.0188	0.0125	0.980098	3.05275	0.0044868	0.0380521	-4.14884
RBBP4	AA	1629	3.1	1	3.2	0	0.9983	0.1124	0.015	-0.00954242	0.983095	-3.26371	0.00258278	0.0252745	-3.62339
S100PBP	AT	1635	9	NA	NA	0	1	0.5251	0.0794	0.0522545	0.518706	3.02149	0.00486329	0.0404555	-4.22509
S100PBP	AT	1636	7	NA	NA	0	1	0.5251	0.0794	-0.0522545	0.481294	-3.02149	0.00486329	0.0404555	-4.22509
RNF19B	AA	1647	3.1	2	3.2	0	1	0.392	0.0519	-0.0362424	0.214364	-3.11865	0.00378183	0.0336037	-3.98673
AK2	AT	1650	8.2	NA	NA	0	1	0.6258	0.1051	0.114436	0.522206	5.83724	1.6227e-06	7.47531e-05	3.64281
AK2	AT	1651	10	NA	NA	0	1	0.5702	0.104	-0.124764	0.466709	-6.86609	8.20106e-08	6.33428e-06	6.64781
AK2	ES	1654	02:03:00	1	4	0	1	0.8686	0.0665	-0.0264576	0.966735	-3.09909	0.00397928	0.0348648	-4.03505
ZSCAN20	AT	1678	6.2	NA	NA	0	1	0.6527	0.1169	-0.115224	0.424567	-5.30995	7.63292e-06	0.000261662	2.09337
ZSCAN20	AT	1679	8	NA	NA	0	1	0.6527	0.1169	0.115224	0.57543	5.30968	7.63885e-06	0.000261662	2.0926
CSMD2	AT	1687	50	NA	NA	0	1	0.8237	0.1802	-0.232145	0.664261	-7.42105	1.70017e-08	1.7867e-06	8.23889
CSMD2	AT	1688	51	NA	NA	0	1	0.3348	0.0678	0.0688303	0.0523818	4.84361	2.99703e-05	0.000792905	0.73199
CSMD2	AT	1689	78	NA	NA	0	1	0.6718	0.1218	0.107	0.220258	4.37648	0.000116456	0.00232005	-0.610194
CSMD2	AT	1690	17.2	NA	NA	0	1	0.4167	0.075	0.0563121	0.0630985	3.78773	0.000619773	0.00864692	-2.2469
CLSPN	AT	1730	25	NA	NA	0	1	0.8402	0.1877	0.288242	0.335076	7.23527	2.8691e-08	2.68279e-06	7.70934
CLSPN	AT	1731	26	NA	NA	0	1	0.8402	0.1877	-0.288242	0.664924	-7.23527	2.8691e-08	2.68279e-06	7.70934
AGO3	AT	1740	8	NA	NA	0	1	0.6582	0.1091	0.0825606	0.226117	4.07072	0.000279455	0.00459292	-1.4698
AGO3	AT	1741	22	NA	NA	0	1	0.6744	0.1208	-0.0884	0.643715	-3.91795	0.000430392	0.00646267	-1.8918
MAP7D1	AA	1758	15.1	14	15.2	0	1	0.2165	0.0262	-0.024097	0.0966606	-4.21478	0.000185314	0.00331738	-1.06705
STK40	AA	1773	4.1	3	4.2	0	0.9843	0.379	0.0304	0.0164688	0.0247446	4.07238	0.000290364	0.0047456	-1.48253
STK40	ES	1774	2	1	3	0	0.9948	0.8099	0.1276	0.102448	0.447682	4.51656	7.76777e-05	0.00169587	-0.210829
OSCP1	AT	1777	7	NA	NA	0	0.9965	0.7396	0.131	0.0915212	0.300476	3.75296	0.000682763	0.00926955	-2.34095
OSCP1	AT	1778	13.2	NA	NA	0	0.9965	0.7396	0.131	-0.0915212	0.699524	-3.75296	0.000682763	0.00926955	-2.34095
MEAF6	ES	1804	7	5	8.1	1	0.9895	0.4356	0.0597	-0.0349742	0.166991	-3.37298	0.00203025	0.0210537	-3.34757
RHBDL2	AP	1859	1	NA	NA	0	0.9983	0.9729	0.2076	0.245067	0.61973	6.34059	3.73402e-07	2.21163e-05	5.11934
RHBDL2	AP	1860	3	NA	NA	0	0.9983	0.9729	0.2007	-0.226121	0.365861	-6.02939	9.24686e-07	4.73638e-05	4.20737
MACF1	ES	1881	107	106	108	0	1	0.7636	0.1437	0.174379	0.472905	6.98678	5.80931e-08	4.78104e-06	6.9961
MACF1	ES	1885	77	76.1	79	0	0.9511	0.3288	0.0501	0.111052	0.922235	12.0596	1.44651e-13	1.21434e-10	20.1217
MACF1	ES	1887	59	58	60	0	0.8831	0.6518	0.1388	0.261508	0.749584	9.05311	1.83764e-09	3.04823e-07	10.8198
MACF1	ES	1888	43.2:44:45:46:47	42	48	0	0.9372	1	0.2714	-0.418059	0.559057	-7.32982	2.6521e-08	2.54486e-06	7.82531
PPIE	AT	1901	10	NA	NA	0	1	0.4618	0.0743	0.0833636	0.808406	4.73807	4.07891e-05	0.00101852	0.42636
PPIE	AT	1902	12	NA	NA	0	1	0.4652	0.0725	-0.0847545	0.186223	-4.86855	2.78619e-05	0.000746996	0.804395
BMP8B	AT	1911	6.2	NA	NA	0	1	0.8458	0.1374	-0.115945	0.227294	-4.70545	4.48581e-05	0.00108979	0.33216
BMP8B	AT	1912	8	NA	NA	0	1	0.8458	0.1374	0.115945	0.772706	4.70545	4.48581e-05	0.00108979	0.33216
NFYC	AP	2015	4	NA	NA	0	1	0.5092	0.0698	-0.0658212	0.0806773	-4.50107	8.12442e-05	0.00175715	-0.255148
NFYC	ES	2020	18	17	19	0	1	0.3128	0.0426	0.0233818	0.0889182	3.06859	0.00430683	0.0369609	-4.11006
CTPS1	AP	2025	2	NA	NA	0	0.986	0.6379	0.0436	-0.0440839	0.0285297	-3.08177	0.00432653	0.0370974	-4.07099
SCMH1	AP	2041	1	NA	NA	0	0.9232	1	0.1663	-0.190747	0.830927	-5.69479	3.42681e-06	0.000135903	2.98958
SCMH1	AP	2042	4.1	NA	NA	0	0.9232	0.4452	0.0572	0.06294	0.0343952	4.09027	0.000303267	0.00491264	-1.47236
SCMH1	AP	2046	3	NA	NA	0	0.9232	1	0.1402	0.12779	0.134671	4.41256	0.000124358	0.00243878	-0.593706
SCMH1	ES	2049	07:08:00	6	9	0	0.9878	0.4492	0.0849	-0.0804758	0.900026	-4.29942	0.000145376	0.00275745	-0.828516
SCMH1	ES	2053	06:07:08	5	9	0	0.9878	0.6652	0.1289	-0.094275	0.81832	-3.48956	0.00144758	0.0163082	-3.04521
PPCS	AD	2075	2.2	2.1	3.1	0	1	0.6833	0.1053	0.115318	0.647838	5.89623	1.36518e-06	6.53562e-05	3.81619
CCDC23	AP	2118	2	NA	NA	0	0.9965	0.2664	0.0366	0.0197438	0.0359508	3.42571	0.00171827	0.0186042	-3.21036
CCDC23	AP	2119	1	NA	NA	0	0.9965	0.2664	0.0366	-0.0197438	0.964049	-3.42571	0.00171827	0.0186042	-3.21036
EBNA1BP2	AP	2145	2.1	NA	NA	0	0.9948	0.4168	0.0498	0.0826969	0.92908	6.18276	6.72064e-07	3.62403e-05	4.56053
EBNA1BP2	AP	2146	1	NA	NA	0	0.9948	0.4168	0.0498	-0.0826969	0.07092	-6.18276	6.72064e-07	3.62403e-05	4.56053
TMEM125	AA	2153	2.1	1	2.2	0	0.9651	0.9357	0.1332	0.0935767	0.239035	3.25499	0.00283604	0.0270541	-3.64451
SZT2	AT	2175	7	NA	NA	0	1	0.4878	0.0641	0.0340273	0.166674	2.92683	0.00619355	0.0483213	-4.45319
HYI	AT	2181	8.3	NA	NA	0	0.9965	0.2686	0.0433	0.0254531	0.0503677	4.03402	0.000323377	0.00518299	-1.588
HYI	AT	2182	9	NA	NA	0	0.9965	0.2686	0.0433	-0.0254531	0.949632	-4.03402	0.000323377	0.00518299	-1.588
HYI	AD	2185	2.2	2.1	4	1	0.8953	0.3041	0.0465	-0.0455607	0.892967	-3.56188	0.00136019	0.0155986	-2.88356
ST3GAL3	ES	2273	10	9	13	0	0.9773	0.8389	0.1192	0.101927	0.143349	4.52298	9.14308e-05	0.0019235	-0.289307
B4GALT2	AP	2514	2.1	NA	NA	0	0.836	1	0.231	0.267771	0.403325	3.39718	0.00351872	0.031806	-3.39952
B4GALT2	AP	2515	1	NA	NA	0	0.836	1	0.231	-0.267771	0.596675	-3.39718	0.00351872	0.031806	-3.39952
B4GALT2	AD	2517	2.2	2.1	3	0	0.9093	0.6415	0.1412	-0.150016	0.926629	-4.07511	0.00066848	0.00913869	-1.84793
CCDC24	AP	2518	2	NA	NA	0	0.8621	0.8013	0.1328	-0.124538	0.468258	-3.37665	0.00290338	0.0275649	-3.39153
CCDC24	AA	2532	4.1	3.2	4.2	0	0.9058	0.8688	0.1618	0.186313	0.485115	4.1876	0.000363073	0.00569666	-1.41866
DMAP1	RI	2545	1.2:1.3	1.1	1.4	0	0.9843	0.6484	0.1204	0.0830687	0.778871	3.27403	0.00257054	0.0251828	-3.59692
DMAP1	RI	2547	1.2	1.1	1.3	0	0.9843	0.9181	0.1244	0.111925	0.360546	4.01369	0.000342337	0.00541918	-1.64377
EIF2B3	AT	2588	10.2	NA	NA	0	1	0.8353	0.085	0.0812667	0.147564	3.90955	0.000440676	0.00657752	-1.91483
EIF2B3	AT	2589	12	NA	NA	0	1	0.8353	0.085	-0.0812697	0.852435	-3.9098	0.000440374	0.00657752	-1.91416
MUTYH	AP	2593	3	NA	NA	0	0.9843	0.6637	0.1222	0.103978	0.148312	4.57124	7.03429e-05	0.00157005	-0.0862811
MUTYH	AP	2595	1.1	NA	NA	0	0.9843	0.7847	0.1203	-0.0943594	0.657317	-4.73385	4.40826e-05	0.0010763	0.376614
AKR1A1	AT	2695	5.2	NA	NA	0	1	0.4223	0.0466	0.0241242	0.0433409	4.03313	0.000310896	0.00501036	-1.57412
AKR1A1	AT	2696	10	NA	NA	0	1	0.4223	0.0466	-0.0241242	0.956659	-4.03313	0.000310896	0.00501036	-1.57412
AKR1A1	ES	2697	7	6	8	1	0.925	0.3586	0.0528	-0.050015	0.934806	-4.84263	0.0001038	0.00211489	-0.0237418
NASP	ES	2706	9	8	10	0	1	0.8366	0.1592	0.126436	0.409164	3.93325	0.000412245	0.00624951	-1.84977
NASP	ES	2754	2	1	3	0	1	0.7519	0.1138	-0.0747576	0.43967	-4.42765	0.00010047	0.00206522	-0.464683
IPP	AT	2771	9.2	NA	NA	0	1	0.4049	0.0509	0.0300485	0.849252	2.93736	0.00603018	0.0474596	-4.42803
IPP	AT	2772	10	NA	NA	0	1	0.4049	0.0509	-0.0300515	0.150747	-2.93763	0.00602609	0.0474444	-4.42739
MKNK1	AP	2798	2.1	NA	NA	0	0.9686	0.7446	0.1133	0.0984	0.608764	4.22374	0.000199171	0.00351533	-1.08624
MKNK1	AP	2800	1	NA	NA	0	0.9686	0.7446	0.1133	-0.0984	0.391236	-4.22374	0.000199171	0.00351533	-1.08624
MKNK1	AT	2804	7.2	NA	NA	0	1	0.1767	0.0277	0.0252242	0.0390273	3.34928	0.00205618	0.0212774	-3.40514
EFCAB14	AT	2823	13	NA	NA	0	1	0.3194	0.0518	0.0400303	0.129473	3.71964	0.000748923	0.00991078	-2.43073
EFCAB14	AT	2824	11	NA	NA	0	1	0.3194	0.0518	-0.0400303	0.870527	-3.71964	0.000748923	0.00991078	-2.43073
EFCAB14	ES	2825	7	6	8	0	1	0.7609	0.1196	0.102106	0.641226	4.63465	5.51288e-05	0.00129354	0.128082
OSBPL9	ES	2979	6.1	5	7	0	0.993	0.5426	0.0883	0.117688	0.787853	5.59593	3.29413e-06	0.000131849	2.93333
CC2D1B	AT	3001	24	NA	NA	0	1	0.3417	0.0506	0.0349303	0.0892045	3.58341	0.00109027	0.0132508	-2.79439
CC2D1B	AT	3002	25.3	NA	NA	0	1	0.3417	0.0506	-0.0349303	0.910795	-3.58341	0.00109027	0.0132508	-2.79439
ECHDC2	ES	3023	13	12	14	1	0.9058	0.2919	0.0484	-0.0313	0.92618	-3.38143	0.0025052	0.0247135	-3.35575
ECHDC2	ES	3033	5.1:6.1	2.1	6.2	0	0.9721	1	0.164	0.0848645	0.277717	2.95783	0.00592299	0.0468847	-4.36857
ECHDC2	ES	3037	5.1	2.1	6.2	0	0.9442	0.8555	0.105	0.07887	0.109632	3.70507	0.000864686	0.0111115	-2.49696
SCP2	ES	3045	12	11	13	0	1	0.8004	0.1682	0.193094	0.484768	6.72601	1.22571e-07	8.87436e-06	6.24217
YIPF1	ES	3074	12	11	13	0	1	0.6499	0.1003	-0.0825424	0.744277	-4.6916	4.67066e-05	0.00112846	0.292172
HSPB11	AT	3097	6	NA	NA	0	1	0.6636	0.0975	0.0630606	0.739397	3.10744	0.00389379	0.0343279	-4.01443
HSPB11	AT	3099	7	NA	NA	0	1	0.4204	0.0662	-0.0749303	0.216259	-4.98211	1.99813e-05	0.000575542	1.13469
CYB5RL	AT	3128	4.3	NA	NA	0	1	0.8746	0.1721	0.13597	0.197215	4.45774	9.20991e-05	0.00193201	-0.378897
CYB5RL	AT	3129	10	NA	NA	0	1	0.8746	0.1721	-0.13597	0.802785	-4.45774	9.20991e-05	0.00193201	-0.378897
MRPL37	AT	3137	8	NA	NA	0	1	0.2167	0.0287	-0.0303515	0.0406758	-4.11607	0.000245636	0.00419232	-1.34347
MRPL37	AT	3138	7	NA	NA	0	1	0.2167	0.0287	0.0303485	0.959326	4.11576	0.000245857	0.00419445	-1.34435
SSBP3	ES	3144	7	6	8	0	0.9965	0.9003	0.154	0.187091	0.139431	8.94747	3.55781e-10	8.73341e-08	12.2042
ACOT11	AT	3145	18	NA	NA	0	1	0.921	0.1637	-0.147912	0.36742	-4.17562	0.00020727	0.00362769	-1.17695
ACOT11	AT	3146	16	NA	NA	0	1	0.921	0.1637	0.147912	0.63258	4.17562	0.00020727	0.00362769	-1.17695
DHCR24	AP	3178	2	NA	NA	0	1	0.3466	0.0163	0.00447576	0.00333485	3.06971	0.0042944	0.0368974	-4.10732
DHCR24	AP	3179	1	NA	NA	0	1	0.3466	0.0163	-0.00447576	0.996665	-3.06971	0.0042944	0.0368974	-4.10732
INADL	AT	3237	40.2	NA	NA	0	1	0.5058	0.0799	0.0967152	0.0930636	6.17552	6.03626e-07	3.31602e-05	4.63605
INADL	AT	3239	47.3	NA	NA	0	1	0.5707	0.1002	-0.106376	0.840376	-5.7555	2.06219e-06	9.01783e-05	3.40248
ITGB3BP	ES	3267	2	1	3	0	0.9895	0.3742	0.0663	0.0640187	0.0727138	4.50721	8.4508e-05	0.00181169	-0.26768
ROR1	AT	3274	8.2	NA	NA	0	1	0.6576	0.091	0.0889758	0.0876939	5.7793	1.92315e-06	8.52e-05	3.47246
ROR1	AT	3275	10	NA	NA	0	1	0.6576	0.091	-0.0889758	0.912306	-5.7793	1.92315e-06	8.52e-05	3.47246
RAVER2	AT	3278	11.2	NA	NA	0	1	0.1482	0.0159	0.0111758	0.0111212	4.30424	0.000143378	0.00272542	-0.814901
RAVER2	AT	3279	12	NA	NA	0	1	0.1482	0.0159	-0.0111758	0.988879	-4.30424	0.000143378	0.00272542	-0.814901
LEPR	AT	3295	22	NA	NA	0	1	0.8043	0.172	-0.352509	0.416309	-12.8313	2.69242e-14	2.89589e-11	21.839
LEPR	AT	3297	21	NA	NA	0	1	0.8164	0.1764	0.360382	0.570045	12.9396	2.13812e-14	2.84746e-11	22.0745
LEPR	AT	3298	23	NA	NA	0	1	0.0244	0.0049	-0.00731818	0.0117045	-7.68175	8.21019e-09	9.85851e-07	8.97621
SGIP1	AP	3307	23.1	NA	NA	0	0.7784	1	0.2197	0.118676	0.261523	3.0466	0.0062175	0.0484738	-4.13114
WDR78	AT	3330	18	NA	NA	0	0.986	0.9431	0.1647	-0.0958424	0.866539	-3.25093	0.0026718	0.0258863	-3.65577
SERBP1	AA	3354	5.1	4.2	5.2	0	1	0.4534	0.0532	0.0285242	0.25715	3.14245	0.00355414	0.0320931	-3.92772
SERBP1	AA	3355	4.1	3	4.2	0	1	0.59	0.052	-0.0372182	0.58827	-4.55032	7.04339e-05	0.00157128	-0.114139
SRSF11	AP	3370	1	NA	NA	0	0.9965	0.5467	0.0912	-0.0769333	0.23643	-3.43019	0.00165415	0.0180703	-3.19626
SRSF11	AP	3373	3.1	NA	NA	0	0.9965	0.5467	0.0926	0.0750394	0.759689	3.23118	0.00281503	0.0269238	-3.70562
SRSF11	AA	3379	15.1	14	15.2	0	1	0.4912	0.051	-0.0348667	0.636618	-3.36721	0.00195971	0.0205061	-3.35906
HHLA3	ES	3406	2.1:2.2	1.1	3	0	0.9093	0.9096	0.1286	-0.088512	0.193	-3.32298	0.00278192	0.0267213	-3.4893
PTGER3	AT	3415	4	NA	NA	0	1	0.6781	0.1374	-0.153603	0.304386	-5.55386	3.72748e-06	0.000145484	2.80964
CRYZ	ES	3467	8	7	9	0	1	1	0.0968	-0.0465636	0.956039	-3.71881	0.000750651	0.00992168	-2.43297
ACADM	AT	3483	14	NA	NA	0	1	0.1622	0.0193	-0.0103424	0.986153	-2.99614	0.0051903	0.0425486	-4.28659
ACADM	AT	3486	13.2	NA	NA	0	1	0.1622	0.0193	0.0103455	0.0138485	2.99657	0.00518459	0.0425098	-4.28555
RABGGTB	ES	3514	05:06:00	4.1	7	0	1	0.6916	0.1231	0.102858	0.244638	4.25146	0.000166833	0.00305881	-0.963855
USP33	AT	3530	22.2	NA	NA	0	1	0.1801	0.0259	0.0199939	0.0304182	4.59094	6.25987e-05	0.00142691	0.00241103
USP33	AT	3531	25	NA	NA	0	1	0.1801	0.0259	-0.0199939	0.969582	-4.59094	6.25987e-05	0.00142691	0.00241103
USP33	AA	3533	15.1	14	15.2	0	0.986	0.6961	0.116	-0.0843697	0.714139	-3.17629	0.00325272	0.030038	-3.84339
USP33	ES	3534	2	1	3	0	1	0.5438	0.092	0.0803212	0.771736	3.76872	0.000653472	0.00898819	-2.29835
NEXN	ES	3541	3	2	4	0	0.7871	0.825	0.1497	-0.123084	0.338452	-3.37505	0.00244624	0.024257	-3.36474
FUBP1	AT	3542	23	NA	NA	0	1	0.2745	0.0493	-0.0349121	0.110598	-3.36723	0.00195963	0.0205061	-3.35902
FUBP1	AT	3543	21.2	NA	NA	0	1	0.2745	0.0493	0.0349121	0.889402	3.36723	0.00195963	0.0205061	-3.35902
LPHN2	ES	3564	29	27	31	1	0.8831	0.7003	0.1176	-0.0835806	0.520141	-3.43124	0.0017401	0.0187666	-3.19912
ODF2L	ES	3675	15	14	17	0	1	0.8938	0.1843	-0.102836	0.8455	-4.9837	1.98883e-05	0.000574277	1.13933
ODF2L	ES	3678	4	3.2	5	0	1	0.5567	0.0932	-0.0748152	0.866538	-3.15994	0.00339516	0.030963	-3.88419
2020-09-15	ES	3687	5	4	6	0	1	0.2848	0.0304	-0.0124848	0.960567	-2.95598	0.00575121	0.0458803	-4.38341
2020-09-15	ES	3688	3	2	4	0	1	0.0379	0.0048	-0.0051	0.00962273	-4.98934	1.95622e-05	0.000566351	1.15577
HS2ST1	AT	3691	8	NA	NA	0	1	0.3883	0.0567	0.0576364	0.851967	5.70661	2.38024e-06	0.000102655	3.25874
HS2ST1	AT	3692	6.2	NA	NA	0	1	0.3888	0.0559	-0.0499182	0.125202	-4.72339	4.25725e-05	0.0010504	0.38396
HS2ST1	AT	3693	10	NA	NA	0	1	0.1058	0.0147	-0.00772424	0.0228318	-2.9403	0.00598527	0.0472161	-4.42099
PKN2	AP	3696	1	NA	NA	0	0.9825	0.8149	0.1073	0.119442	0.886142	3.41426	0.00172682	0.0186646	-3.23758
PKN2	AP	3697	7	NA	NA	0	0.9825	0.8149	0.1073	-0.119442	0.113858	-3.41426	0.00172682	0.0186646	-3.23758
CCBL2	ES	3704	2	1	3	0	0.9965	0.8103	0.1143	-0.0916818	0.572474	-3.36796	0.00195579	0.0204959	-3.35713
ZNF644	AP	3731	2	NA	NA	0	0.9372	0.8033	0.1441	0.11545	0.155695	3.84585	0.000546487	0.0078564	-2.10055
ZNF644	AP	3732	1	NA	NA	0	0.9372	0.8033	0.1441	-0.11545	0.844305	-3.84585	0.000546487	0.0078564	-2.10055
TGFBR3	AP	3739	3	NA	NA	0	0.9965	0.7985	0.1894	-0.210918	0.403044	-5.14263	1.24775e-05	0.000391127	1.60332
TGFBR3	AP	3741	4.1	NA	NA	0	0.9965	0.7667	0.1382	0.113845	0.422592	3.72077	0.000746572	0.00989186	-2.42768
TGFBR3	AP	3742	1	NA	NA	0	0.9965	0.7001	0.0999	0.0970636	0.174368	5.8403	1.60824e-06	7.44945e-05	3.65179
TGFBR3	ES	3746	5	4.2	6	0	1	0.6003	0.1352	0.201227	0.762695	8.3036	1.49351e-09	2.62947e-07	10.7051
F3	ES	3816	5	4	6	0	1	0.21	0.0208	0.0141424	0.964514	3.53304	0.00125125	0.0146445	-2.92738
RWDD3	ES	3828	2	1	3.1	0	0.9407	1	0.1715	0.133763	0.518482	3.29949	0.00275615	0.0265281	-3.5391
AKNAD1	AT	3952	9.2	NA	NA	0	0.7679	0.9465	0.2526	0.2136	0.434953	3.9121	0.000966742	0.0121044	-2.21681
GSTM4	RI	4055	2.4	2.3	2.5	0	0.993	0.3066	0.0434	0.0209438	0.0286677	3.98947	0.000366349	0.00572919	-1.71009
GSTM4	RI	4056	2.2	2.1	2.3	0	0.986	1	0.0586	0.0124688	0.0142	3.48784	0.00145428	0.016371	-3.04966
AHCYL1	AP	4088	2.1	NA	NA	0	0.9983	0.6818	0.1302	0.120221	0.114659	5.53412	3.95001e-06	0.000152143	2.75163
AHCYL1	AP	4089	1	NA	NA	0	0.9983	0.6818	0.1302	-0.120221	0.885341	-5.53412	3.95001e-06	0.000152143	2.75163
KCNC4	AA	4098	4.1:4.2:4.3	3	4.4	0	0.9948	0.7683	0.1399	0.0951303	0.804041	3.54605	0.0012076	0.0142934	-2.89311
CHI3L2	AP	4145	3.1	NA	NA	0	0.8639	0.9384	0.2445	-0.227164	0.235821	-4.94769	4.43764e-05	0.00108107	0.602368
ADORA3	AT	4174	3	NA	NA	0	1	0.865	0.16	-0.159042	0.573615	-5.66138	2.71822e-06	0.000114535	3.12573
ADORA3	AT	4175	8	NA	NA	0	1	0.865	0.16	0.159042	0.426385	5.66138	2.71822e-06	0.000114535	3.12573
ST7L	AT	4205	18	NA	NA	0	1	0.651	0.1112	-0.0538	0.828324	-3.19025	0.00313566	0.0292272	-3.80848
ST7L	AT	4207	16.2	NA	NA	0	1	0.651	0.1112	0.0538	0.171676	3.19025	0.00313566	0.0292272	-3.80848
MOV10	AP	4221	1	NA	NA	0	0.9407	0.7022	0.138	-0.185496	0.743505	-5.34548	1.41544e-05	0.000432887	1.71098
MOV10	AP	4222	2.1	NA	NA	0	0.9407	0.7022	0.138	0.185496	0.256495	5.34548	1.41544e-05	0.000432887	1.71098
AP4B1	RI	4309	1.2	1.1	1.3	0	0.8098	0.9494	0.1872	0.119762	0.452	3.49586	0.00219762	0.0223982	-3.11876
CSDE1	ES	4333	6	5	7	0	1	0.4322	0.0472	0.0602909	0.169561	8.10091	2.58952e-09	4.00719e-07	10.1464
CSDE1	ES	4336	3	2	4	0	1	0.0803	0.0087	-0.00709697	0.0137061	-3.05025	0.00451597	0.0382551	-4.15498
CSDE1	ES	4338	02:03:00	1	4	0	0.8115	1	0.1933	-0.165219	0.308347	-3.03455	0.0054639	0.0441474	-4.16767
SLC22A15	AT	4354	12	NA	NA	0	1	0.4195	0.071	-0.0564848	0.90633	-3.16698	0.00333317	0.0306294	-3.86665
SLC22A15	AT	4355	6.3	NA	NA	0	1	0.4195	0.071	0.0564848	0.0936697	3.16698	0.00333317	0.0306294	-3.86665
ATP1A1	AP	4358	2	NA	NA	0	1	0.1211	0.0096	-0.0049	0.00968939	-3.19663	0.00308345	0.0288323	-3.79249
CD58	AT	4361	6	NA	NA	0	1	0.5775	0.0733	-0.0396606	0.842952	-3.30505	0.00231403	0.0232822	-3.51831
CD58	AT	4362	4.2	NA	NA	0	1	0.2397	0.0429	0.0265909	0.0903258	3.27322	0.00251844	0.0248162	-3.59929
PDE4DIP	AP	4407	3	NA	NA	0	1	0.8482	0.1693	-0.202706	0.774411	-6.61591	1.68297e-07	1.15396e-05	5.92235
PDE4DIP	AP	4408	13.1	NA	NA	0	1	0.8269	0.162	0.176133	0.189842	5.99661	1.01768e-06	5.14672e-05	4.11111
PDE4DIP	AT	4417	7	NA	NA	0	1	0.262	0.028	-0.0138091	0.0437985	-2.91983	0.00630441	0.048943	-4.46989
PDE4DIP	AD	4426	13.2	13.1	14	0	1	0.3101	0.0516	-0.0301667	0.949317	-3.7731	0.000645553	0.00892365	-2.28651
POLR3GL	ES	7278	4	3	5	0	1	0.1654	0.0274	-0.0173545	0.976465	-3.30836	0.00229369	0.0231359	-3.50986
RNF115	ES	7297	3	2	4	0	0.9913	0.4969	0.0586	-0.04925	0.114874	-3.14532	0.00359895	0.0324046	-3.91813
CD160	RI	7300	5.2	5.1	5.3	0	0.8586	0.9898	0.3601	0.344643	0.506364	4.00908	0.000564317	0.0080417	-1.85652
FMO5	AT	7368	10	NA	NA	0	1	0.7163	0.099	-0.113906	0.405914	-8.26727	1.64773e-09	2.80676e-07	10.6053
HIST2H2BF	AT	7398	3	NA	NA	0	0.9965	0.5097	0.0843	-0.0842121	0.145818	-3.75967	0.000670142	0.00915003	-2.32283
HIST2H2BF	AT	7400	1.2	NA	NA	0	0.9965	0.6882	0.13	0.105173	0.707853	3.4856	0.00142369	0.0161403	-3.05185
MTMR11	AP	7412	1	NA	NA	0	0.9878	0.8807	0.2077	-0.152153	0.847646	-4.74561	4.26154e-05	0.0010504	0.410187
MTMR11	AP	7413	2.1	NA	NA	0	0.9878	0.8807	0.2077	0.152153	0.152354	4.74561	4.26154e-05	0.0010504	0.410187
ANP32E	AA	7431	8.1	7	8.2	0	0.993	0.3826	0.0369	-0.0383875	0.922954	-3.601	0.00107064	0.0130592	-2.75377
APH1A	ES	7448	2.2	1	3	1	0.9337	0.8993	0.1655	-0.225296	0.368836	-5.27441	1.70355e-05	0.000504498	1.52456
APH1A	ES	7451	3	1	4	1	0.8133	0.6579	0.1259	0.182155	0.692124	7.41108	2.28318e-07	1.45633e-05	6.10946
TARS2	ES	7475	08:09:00	7	10	0	1	0.4299	0.0656	0.0831758	0.827782	4.92385	2.36988e-05	0.000660429	0.965113
ADAMTSL4	AP	7484	3.1	NA	NA	0	0.8778	1	0.2045	0.122228	0.174673	3.07876	0.00455195	0.0384831	-4.0722
ADAMTSL4	AP	7485	1	NA	NA	0	0.8778	1	0.2045	-0.122228	0.825327	-3.07876	0.00455195	0.0384831	-4.0722
ADAMTSL4	AT	7486	16.2	NA	NA	0	1	0.3486	0.0495	0.0269879	0.0506242	3.75373	0.00068129	0.00926115	-2.33885
ADAMTSL4	AT	7487	20	NA	NA	0	1	0.3486	0.0495	-0.0269879	0.949376	-3.75373	0.00068129	0.00926115	-2.33885
ENSA	AP	7490	1	NA	NA	0	1	0.1697	0.0267	-0.0366788	0.960745	-7.07263	4.54963e-08	3.94373e-06	7.24312
ENSA	AP	7491	2	NA	NA	0	1	0.1697	0.0267	0.0366788	0.0392545	7.07263	4.54963e-08	3.94373e-06	7.24312
ARNT	ES	7513	7	6	8	0	0.9825	0.5625	0.0982	-0.0472906	0.864122	-3.35714	0.00206309	0.0213388	-3.38614
CERS2	AT	7527	12	NA	NA	0	1	0.1556	0.0209	0.0159273	0.0406364	3.82702	0.000555409	0.0079459	-2.14025
CERS2	AT	7528	11	NA	NA	0	1	0.1556	0.0209	-0.0159273	0.959364	-3.82702	0.000555409	0.0079459	-2.14025
FAM63A	AA	7539	4.1	2.2	4.2	1	0.9599	0.7476	0.1476	-0.15595	0.620208	-6.71995	1.4573e-07	1.02802e-05	6.1019
SCNM1	AP	7563	1	NA	NA	0	1	0.4273	0.0769	-0.0973424	0.143086	-6.66011	1.48166e-07	1.03523e-05	6.05083
SCNM1	AP	7564	2.1	NA	NA	0	1	0.4273	0.0769	0.0973424	0.856914	6.66011	1.48166e-07	1.03523e-05	6.05083
PIP5K1A	ES	7580	3	2.2	4	0	0.986	0.4505	0.0767	-0.0857636	0.159973	-6.46179	2.62732e-07	1.64247e-05	5.47337
PI4KB	ES	7591	5	4	6	0	0.9895	0.5996	0.1067	-0.0839848	0.430032	-3.51968	0.00129764	0.0150352	-2.9625
PI4KB	ES	7592	3	2	4	0	0.9895	0.954	0.1414	0.113818	0.451552	4.06306	0.000285593	0.00468156	-1.49107
PI4KB	ES	7599	02:03:00	1	4	0	0.9913	0.8403	0.1514	0.140155	0.49965	5.21599	1.00593e-05	0.000324826	1.81802
RFX5	AP	7601	2	NA	NA	0	0.9808	0.7751	0.1172	0.106339	0.240645	3.4761	0.00154439	0.0171254	-3.08407
RFX5	AP	7603	1	NA	NA	0	0.9808	0.8268	0.1271	-0.111094	0.653897	-3.72625	0.000787261	0.0103332	-2.43122
TUFT1	ES	7640	3	1	4	0	0.9564	0.8825	0.1654	-0.114581	0.784489	-3.15111	0.00362148	0.032554	-3.90169
SNX27	AA	7646	12.1	11	12.2	0	0.9913	0.9171	0.1479	0.117976	0.469206	4.33077	0.000132843	0.00256961	-0.739811
MRPL9	ES	7650	5	4	6	0	1	0.1673	0.0267	-0.0138576	0.952095	-2.99999	0.00513927	0.0422169	-4.27725
TDRKH	AT	7661	17	NA	NA	0	1	0.6392	0.0954	-0.0538303	0.269418	-4.14055	0.000229087	0.00395286	-1.27511
TDRKH	AT	7662	15.3	NA	NA	0	1	0.6437	0.0999	0.0688394	0.642638	4.14538	0.000225956	0.00390803	-1.26161
THEM4	AT	7675	2.2	NA	NA	0	1	0.6763	0.0778	0.0709697	0.113445	4.45971	9.15768e-05	0.00192473	-0.373287
THEM4	AT	7676	7	NA	NA	0	1	0.6763	0.0778	-0.0709697	0.886555	-4.45971	9.15768e-05	0.00192473	-0.373287
S100A4	AP	7711	2	NA	NA	0	1	0.8452	0.0866	-0.0577485	0.950071	-5.20003	1.05423e-05	0.000338663	1.77126
S100A4	AP	7713	4	NA	NA	0	1	0.8452	0.0865	0.0576	0.0496	5.22254	9.86759e-06	0.000319338	1.83721
S100A4	ES	7714	3	2	5	0	1	0.1317	0.0197	0.0167879	0.0349455	3.49277	0.00139623	0.0159298	-3.03309
S100A2	AP	7717	2	NA	NA	0	0.9895	0.7195	0.1253	-0.208722	0.182002	-6.23486	5.78926e-07	3.19631e-05	4.71072
S100A2	AP	7720	3	NA	NA	0	0.9895	0.832	0.1466	0.255941	0.745835	7.8883	5.77268e-09	7.68781e-07	9.37146
S100A16	AP	7723	1	NA	NA	0	0.9965	0.6764	0.0847	0.0496562	0.937452	9.59371	6.97886e-11	2.32354e-08	13.8633
S100A16	AP	7724	3	NA	NA	0	0.9965	0.2885	0.0182	-0.00967187	0.0116138	-2.98534	0.00542775	0.0439379	-4.30784
S100A16	AP	7725	2.1	NA	NA	0	0.9965	0.6631	0.0783	-0.0399906	0.0509262	-8.39805	1.48323e-09	2.62947e-07	10.7519
S100A14	AP	7727	3	NA	NA	0	0.836	1	0.2443	0.225488	0.346318	4.08444	0.000408391	0.00619917	-1.61023
S100A14	AP	7729	1	NA	NA	0	0.836	1	0.2443	-0.225488	0.653682	-4.08444	0.000408391	0.00619917	-1.61023
S100A13	AP	7733	4	NA	NA	0	0.9965	0.4792	0.0824	-0.0994	0.210137	-5.16185	1.28031e-05	0.000399339	1.60642
ILF2	AT	7753	6.2	NA	NA	0	1	0.0427	0.004	-0.00259394	0.00545455	-3.38364	0.00187515	0.0198432	-3.31673
ILF2	AT	7754	14	NA	NA	0	1	0.0427	0.004	0.00259091	0.994544	3.3795	0.0018961	0.0200312	-3.32739
INTS3	RI	7758	27.2	27.1	27.3	0	1	0.4443	0.0721	0.0406303	0.0697818	3.63312	0.000951138	0.011943	-2.66237
SLC39A1	AP	7763	1	NA	NA	0	0.9983	0.3651	0.0409	0.0174219	0.0332908	3.47709	0.001497	0.0167065	-3.07758
SLC39A1	AP	7764	3	NA	NA	0	0.9983	0.9652	0.0884	-0.0436406	0.883832	-3.0502	0.00459973	0.0388158	-4.15119
JTB	RI	7776	2.2	2.1	2.3	0	1	0.4381	0.0442	0.0228091	0.0638288	3.56352	0.00115127	0.0137971	-2.84699
JTB	RI	7777	1.2	1.1	1.3	0	1	0.0842	0.0148	0.0131545	0.973547	4.96324	2.11172e-05	0.000601464	1.07973
C1orf43	AT	7798	6.2	NA	NA	0	1	0.1625	0.0171	0.00763636	0.029797	3.36766	0.00195734	0.0204959	-3.3579
C1orf43	AT	7799	7	NA	NA	0	1	0.1625	0.0171	-0.00763636	0.970203	-3.36766	0.00195734	0.0204959	-3.3579
C1orf43	ES	7800	4	3	5	0	1	0.5768	0.0474	-0.0226152	0.92138	-3.13895	0.00358684	0.0323286	-3.93642
KCNN3	AP	7840	1	NA	NA	0	0.9773	1	0.3102	-0.415835	0.628752	-7.42321	2.50404e-08	2.44542e-06	7.92179
KCNN3	AP	7841	3	NA	NA	0	0.9773	0.9815	0.3177	0.427219	0.335906	6.82257	1.28961e-07	9.21558e-06	6.26158
SHC1	AA	7856	11.1	10	11.2	0	1	0.3785	0.0512	-0.047103	0.659206	-4.19366	0.000196856	0.00348427	-1.12637
FLAD1	AT	7864	4.4	NA	NA	0	1	0.6675	0.0775	-0.0711848	0.167089	-4.82688	3.14724e-05	0.000822814	0.683464
FLAD1	AT	7865	6.3	NA	NA	0	1	0.707	0.0825	0.0497515	0.705797	2.95342	0.00578875	0.0461072	-4.38954
FLAD1	AA	7869	2.1	1.3	2.2	0	1	0.7451	0.0732	-0.0524424	0.194688	-4.15959	0.000216982	0.00376914	-1.22187
ADAM15	ES	7897	21.1:21.2	20	22.1	0	0.9808	0.9526	0.1683	-0.202332	0.654098	-6.3471	4.84149e-07	2.76174e-05	4.92527
ADAM15	ES	7898	21.2	20	22.1	0	0.9808	1	0.1569	-0.178287	0.67703	-5.67552	3.22805e-06	0.000130033	3.01608
ADAM15	ES	7902	22.1:22.2	20	23	0	0.986	0.3159	0.044	0.0259375	0.03098	4.81946	3.44448e-05	0.000886298	0.621445
ADAM15	ES	7903	21.1:21.2:22.1	20	23	0	0.993	0.9186	0.2029	0.1237	0.331232	3.09363	0.00411376	0.0356715	-4.04525
ADAM15	ES	7904	21.2:22.1	20	23	0	0.9913	0.9222	0.203	0.147088	0.354511	3.91184	0.000437848	0.00655623	-1.90855
ADAM15	ES	7905	22.1	20	23	0	0.9913	0.8382	0.1676	0.240639	0.237747	7.67918	8.26894e-09	9.87509e-07	8.96899
EFNA3	AP	7936	1	NA	NA	0	0.8901	0.5236	0.1138	-0.0799154	0.928218	-4.05729	0.00143752	0.0162282	-2.23134
EFNA3	AP	7937	2	NA	NA	0	0.8901	0.5236	0.1138	0.0799154	0.0717822	4.05729	0.00143752	0.0162282	-2.23134
TRIM46	AT	7951	11	NA	NA	0	1	0.6566	0.1127	-0.1569	0.527902	-6.96966	6.0999e-08	4.96442e-06	6.94678
TRIM46	AT	7953	13	NA	NA	0	1	0.6924	0.1233	0.15457	0.283391	6.34882	3.6458e-07	2.16521e-05	5.14341
MUC1	ES	7975	4.1:4.2:4.3	3.4	6.1	1	0.829	0.8229	0.128	0.182494	0.711678	4.16075	0.000683552	0.00926955	-1.76004
MUC1	ES	7982	2.3:3.1:3.2:3.3:3.4:5:6.1	2.2	6.2	0	0.8045	0.9354	0.2129	0.166805	0.784185	3.30685	0.00341502	0.0311312	-3.54998
MUC1	ES	8018	2.3:3.1	2.2	3.2	0	1	0.235	0.0189	0.0275909	0.970717	3.12025	0.00376609	0.033518	-3.98277
MUC1	ES	8019	2.3:3.1:3.2	2.2	3.3	0	1	0.3486	0.031	0.0546182	0.952012	3.73564	0.000716408	0.00958439	-2.38765
MTX1	ES	8038	4	3	5	0	1	0.1968	0.0301	-0.0176606	0.97997	-4.33855	0.000129901	0.00253054	-0.717775
RUSC1	AP	8077	1	NA	NA	0	0.9913	0.8122	0.173	-0.268236	0.411297	-8.22278	1.85884e-09	3.04823e-07	10.4829
RUSC1	AP	8078	3.1	NA	NA	0	0.9913	0.8122	0.173	0.268236	0.588703	8.22278	1.85884e-09	3.04823e-07	10.4829
ASH1L	AP	8083	1	NA	NA	0	0.7906	0.8583	0.2252	0.232641	0.320981	3.14106	0.00608326	0.0477107	-3.93878
ASH1L	AP	8084	2.1	NA	NA	0	0.7906	0.8583	0.2252	-0.232641	0.679019	-3.14106	0.00608326	0.0477107	-3.93878
YY1AP1	AA	8104	12.1	11	12.2	0	1	0.5523	0.0923	0.104848	0.555058	5.39219	5.99418e-06	0.000214871	2.3347
YY1AP1	ES	8114	3.2	2	4.1	0	0.9843	0.5649	0.0759	-0.05235	0.93956	-3.40207	0.00183036	0.0195339	-3.27115
DAP3	AD	8123	2.3	2.2	3	0	1	0.5003	0.0807	-0.0611061	0.450359	-3.50662	0.00134461	0.0154532	-2.99678
RIT1	AP	8130	1	NA	NA	0	0.9983	0.3344	0.0374	-0.0213	0.983944	-3.92443	0.000422616	0.00637814	-1.87401
RIT1	AP	8131	2	NA	NA	0	0.9983	0.3344	0.0374	0.0213	0.0160561	3.92443	0.000422616	0.00637814	-1.87401
KIAA0907	RI	8136	13.2	13.1	13.3	0	1	0.9031	0.1735	0.105091	0.477709	3.35631	0.00201781	0.0209543	-3.38708
ARHGEF2	AP	8138	6	NA	NA	0	0.9965	0.963	0.1194	0.131652	0.759941	4.92813	2.34041e-05	0.000652641	0.977547
ARHGEF2	AP	8139	1	NA	NA	0	0.9965	0.9352	0.1071	-0.109294	0.123992	-4.072	0.00027844	0.00458179	-1.46624
RAB25	ES	8171	2	1	3	1	0.9389	0.2597	0.0471	-0.0254519	0.929978	-3.40028	0.00213587	0.0219213	-3.2929
C1orf85	AT	8221	6.3	NA	NA	0	1	0.6246	0.0966	0.0826848	0.721197	4.71706	4.3366e-05	0.00106294	0.365668
C1orf85	AT	8222	7	NA	NA	0	1	0.6246	0.0966	-0.0826818	0.278805	-4.71687	4.33905e-05	0.00106295	0.365107
C1orf85	ES	8223	5.1:5.2	4	6.1	1	0.8831	0.7692	0.1566	0.152241	0.542313	3.87156	0.000845441	0.0109184	-2.2173
CCT3	ES	8239	3	1	4	0	1	0.7503	0.077	-0.0403848	0.104835	-3.19774	0.00307446	0.0287702	-3.7897
MEF2D	ES	8275	10	9	11	0	1	0.7636	0.0875	-0.0470333	0.0902439	-3.01149	0.00498985	0.0413061	-4.24938
GPATCH4	AD	8295	5.2:5.3:5.4	5.1	6	0	0.9983	0.5618	0.062	-0.0591606	0.0975742	-3.59382	0.00105959	0.012964	-2.76681
RRNAD1	ES	8311	5	4	6	0	1	0.4943	0.0821	0.052003	0.808774	2.99063	0.00526398	0.0429937	-4.2999
RRNAD1	RI	8313	2.2	2.1	2.3	0	0.9983	0.9329	0.1289	-0.109579	0.389344	-3.93183	0.000413908	0.00627039	-1.8537
MRPL24	AD	8316	1.2	1.1	2	0	0.9983	0.7543	0.0625	0.0554219	0.446962	5.42122	6.04159e-06	0.000215867	2.35655
ARHGEF11	ES	8338	39	38	40	1	0.9895	0.8836	0.1916	-0.273297	0.620326	-9.33333	1.33642e-10	3.91554e-08	13.2013
DCAF8	ES	8443	8.1:8.2	7.3	9	1	0.9476	0.5088	0.0976	-0.0735821	0.723326	-2.96853	0.0061202	0.0479363	-4.32873
DCAF8	AD	8446	7.3	7.2	8.1	0	0.9948	0.6835	0.0997	0.0832303	0.665873	4.00212	0.000339423	0.00539103	-1.65996
DCAF8	AD	8451	7.2:7.3	7.1	9	1	0.9197	0.6874	0.1282	0.132862	0.429958	4.15737	0.000317232	0.00509657	-1.39483
PEX19	ES	8457	3	1	4	0	1	0.2409	0.032	0.0638909	0.928488	8.81285	3.83347e-10	9.10668e-08	12.0869
F11R	AP	8516	1	NA	NA	0	0.9965	1	0.1315	-0.0682688	0.67312	-3.17306	0.00334868	0.0306855	-3.84948
F11R	AP	8517	4.1	NA	NA	0	0.9965	1	0.1315	0.0682688	0.32688	3.17306	0.00334868	0.0306855	-3.84948
TSTD1	ES	8526	2.2:2.3	1	3.1	0	0.9738	1	0.2088	-0.304419	0.553844	-7.77113	9.87202e-09	1.13278e-06	8.86648
TSTD1	ES	8527	2.3	1	3.1	0	0.9965	0.4892	0.0627	-0.0547	0.949017	-3.93064	0.000415286	0.00628501	-1.85694
PVRL4	ES	8552	8	7	9	0	0.9773	0.7495	0.13	-0.12561	0.780502	-3.72661	0.000816017	0.0106227	-2.44058
NIT1	AT	8555	8	NA	NA	0	1	0.5802	0.0672	-0.0492424	0.289803	-3.83141	0.000548628	0.00787029	-2.12829
NIT1	AT	8556	7	NA	NA	0	1	0.5802	0.0672	0.0492394	0.710198	3.8314	0.00054864	0.00787029	-2.12831
PPOX	AT	8567	14	NA	NA	0	1	0.637	0.1009	0.0870606	0.171203	4.25024	0.000167418	0.0030657	-0.967293
PPOX	AT	8568	13	NA	NA	0	1	0.637	0.1009	-0.0870606	0.828797	-4.25024	0.000167418	0.0030657	-0.967293
NR1I3	AT	8622	7.2	NA	NA	0	0.9581	0.4748	0.0739	-0.0570741	0.412798	-3.89675	0.000592209	0.00835228	-2.04219
NR1I3	AT	8624	6.8	NA	NA	0	0.9581	0.4748	0.0739	0.0570741	0.587202	3.89675	0.000592209	0.00835228	-2.04219
SDHC	ES	8660	6	5	7	0	1	0.0704	0.0113	-0.00862121	0.974217	-3.47927	0.00144835	0.0163126	-3.06839
SDHC	ES	8663	3	2	5	0	1	0.1248	0.0152	-0.0145697	0.970506	-6.2143	5.39133e-07	3.0299e-05	4.7497
FCGR3A	AP	8672	4.1	NA	NA	0	0.9267	0.3904	0.0528	0.0486556	0.0817783	4.06695	0.000378545	0.00585786	-1.60195
FCGR3A	AP	8674	1	NA	NA	0	0.9267	0.8367	0.0859	-0.0520444	0.834645	-3.71415	0.000953483	0.0119656	-2.50865
OLFML2B	AP	8734	1	NA	NA	0	0.9913	0.8127	0.0757	-0.0244182	0.968942	-3.11984	0.00377018	0.0335409	-3.9838
OLFML2B	AP	8735	7.1	NA	NA	0	0.9913	0.8127	0.0757	0.0244212	0.0310591	3.12058	0.00376292	0.0334966	-3.98197
UAP1	ES	8750	9.1:9.2	8	10	0	1	0.4842	0.0786	0.0875636	0.820509	5.029	1.74151e-05	0.000514354	1.2714
UAP1	ES	8751	9.2	8	10	0	0.9965	0.8653	0.1513	0.150328	0.545897	3.63477	0.000976559	0.0121891	-2.66471
HSD17B7	ES	8757	7	6	8	0	1	0.2244	0.0247	0.0199	0.97838	3.37191	0.00193515	0.0203556	-3.34696
RGS5	AD	8772	6.2	6.1	7	0	0.9843	0.0891	0.0104	-0.00470303	0.00436364	-3.61998	0.000986142	0.0122878	-2.69734
PBX1	AT	8785	14	NA	NA	0	1	0.1432	0.0167	-0.00921818	0.034003	-3.51856	0.00130162	0.0150695	-2.96545
TMCO1	AP	8805	4.1	NA	NA	0	1	0.2472	0.0215	-0.00914545	0.988582	-2.96468	0.00562493	0.0451103	-4.36248
TMCO1	AP	8806	1	NA	NA	0	1	0.2472	0.0215	0.00914545	0.0114182	2.96468	0.00562493	0.0451103	-4.36248
POGK	ES	8825	04:05:00	3	6.1	0	0.9983	0.3567	0.0384	0.0223333	0.951991	3.17632	0.00325245	0.030038	-3.84332
RCSD1	ES	8870	3	2	4	0	0.9354	0.5028	0.1005	0.133153	0.818356	6.26698	6.99695e-07	3.75919e-05	4.58966
MPZL1	ES	8871	5	4	6	0	1	0.2599	0.0419	0.0492303	0.911952	6.30701	4.11667e-07	2.38995e-05	5.02113
MPZL1	ES	8875	03:04:00	2	6	0	0.9895	0.7696	0.1049	-0.0712545	0.879221	-3.31708	0.00224098	0.0227346	-3.4876
DCAF6	ES	8881	18	17	19	0	1	0.0394	0.0059	-0.00771212	0.00673182	-4.49677	8.22617e-05	0.00177391	-0.267434
TIPRL	AT	8901	8	NA	NA	0	1	0.5486	0.0694	0.0568576	0.833992	5.86117	1.51281e-06	7.10307e-05	3.71316
TIPRL	AT	8902	5	NA	NA	0	1	0.5486	0.0694	-0.0568576	0.166008	-5.86117	1.51281e-06	7.10307e-05	3.71316
BLZF1	AT	8917	8	NA	NA	0	1	0.3329	0.0523	-0.0280424	0.134373	-3.25163	0.00266683	0.0258743	-3.65399
PRRC2C	ES	8988	34	33	35	0	1	1	0.1138	0.104085	0.169655	6.58478	1.84113e-07	1.22783e-05	5.83177
VAMP4	RI	8994	8.2	8.1	8.3	0	1	0.5273	0.1015	-0.0701576	0.867933	-2.95818	0.00571905	0.0457067	-4.37812
METTL13	RI	8997	1.2	1.1	1.3	0	0.9983	0.2096	0.0307	-0.0241273	0.978339	-4.86922	2.78074e-05	0.000746923	0.806339
MRPS14	AD	9044	1.2	1.1	2	0	0.9913	0.449	0.0324	-0.0265219	0.0890754	-4.07768	0.000286071	0.00468588	-1.46793
KIAA0040	AP	9045	1	NA	NA	0	0.9686	0.5531	0.1083	-0.167879	0.234064	-8.30575	1.48487e-09	2.62947e-07	10.711
KIAA0040	AP	9046	2	NA	NA	0	0.9686	0.5531	0.1083	0.167879	0.765936	8.30575	1.48487e-09	2.62947e-07	10.711
TOR1AIP1	ES	9126	9	8	10	0	0.993	0.1419	0.017	-0.0128515	0.0195924	-3.05438	0.00446805	0.0379443	-4.14488
QSOX1	RI	9130	12.2	12.1	12.3	0	1	0.4949	0.0841	-0.0957152	0.825503	-6.31096	4.06968e-07	2.3658e-05	5.03268
MR1	ES	9138	4	3.2	5	0	1	0.7015	0.1055	0.106903	0.499133	5.77346	1.95638e-06	8.62375e-05	3.45529
GLUL	AD	9148	1.3:1.4	1.2	2	0	0.993	0.9844	0.2524	0.325422	0.387606	9.17565	1.98927e-10	5.36346e-08	12.7961
GLUL	AD	9150	1.2:1.3:1.4	1.1	2	0	1	0.3477	0.042	0.0130545	0.0238061	3.79104	0.000614088	0.00858122	-2.23794
GLUL	AD	9152	1.2	1.1	2	0	1	0.1363	0.0218	-0.0291333	0.0421061	-6.61588	1.6831e-07	1.15396e-05	5.92226
ARPC5	AT	9190	5	NA	NA	0	1	0.0307	0.0035	-0.00233939	0.00491818	-3.81484	0.000574627	0.00815162	-2.17335
ARPC5	AT	9191	4	NA	NA	0	1	0.0307	0.0035	0.00233939	0.995082	3.81484	0.000574627	0.00815162	-2.17335
RGL1	AP	9193	4	NA	NA	0	0.9616	0.8438	0.1268	0.113591	0.815762	4.71532	4.35871e-05	0.00106652	0.360629
RGL1	AP	9194	1	NA	NA	0	0.9616	0.8438	0.1268	-0.113588	0.184236	-4.71514	4.36094e-05	0.00106652	0.360124
HMCN1	ES	9219	104	103	105	0	0.9686	0.9089	0.1301	0.116373	0.517102	4.291	0.000148937	0.00280922	-0.852315
RGS1	AT	9234	5	NA	NA	0	1	0.5106	0.0629	-0.0518515	0.941886	-5.46309	4.8668e-06	0.000180953	2.54291
RGS1	AT	9235	4.2	NA	NA	0	1	0.5106	0.0629	0.0518515	0.0581136	5.46309	4.8668e-06	0.000180953	2.54291
UCHL5	AT	9239	14	NA	NA	0	1	0.4751	0.0718	0.0823879	0.198224	5.96755	1.10799e-06	5.48973e-05	4.02573
UCHL5	AT	9240	15	NA	NA	0	1	0.5339	0.0811	-0.0987697	0.777764	-6.54957	2.03817e-07	1.33267e-05	5.72927
TROVE2	AT	9253	10.5	NA	NA	0	1	0.6666	0.1118	0.0593242	0.483153	3.23439	0.00279129	0.02679	-3.69754
TROVE2	AT	9255	11	NA	NA	0	1	0.6666	0.1118	-0.0593242	0.516847	-3.23439	0.00279129	0.02679	-3.69754
CFH	AT	9275	23	NA	NA	0	1	0.5757	0.0982	0.0892091	0.646505	4.74806	3.96176e-05	0.000994924	0.455236
CFH	AT	9276	10	NA	NA	0	1	0.5757	0.0982	-0.0892121	0.353497	-4.74815	3.9607e-05	0.000994924	0.455502
PTPRC	ES	9324	05:06:00	3.1	8	0	0.8883	1	0.1324	-0.0922815	0.326753	-3.43559	0.00195237	0.020478	-3.20594
TMEM9	AP	9349	1	NA	NA	0	0.993	0.2095	0.0276	-0.0248594	0.0363015	-4.45569	9.79234e-05	0.00202519	-0.413218
TMEM9	AP	9351	3.1	NA	NA	0	0.993	0.2394	0.0284	0.0241281	0.0381831	4.95468	2.33123e-05	0.000650496	1.00945
NAV1	AP	9387	6	NA	NA	0	0.7853	1	0.2368	0.240712	0.399098	3.73677	0.00186305	0.0197485	-2.70936
NAV1	AP	9388	1	NA	NA	0	0.7853	1	0.2234	-0.36735	0.514598	-5.97084	2.16101e-05	0.000612723	1.84882
ELF3	RI	9395	1.2:1.3	1.1	1.4	0	0.9948	0.5862	0.0953	0.048903	0.0739212	4.44503	9.5546e-05	0.00198537	-0.415137
PPP1R12B	AP	9411	1	NA	NA	0	0.8726	1	0.2714	-0.296557	0.674485	-7.15112	3.05922e-07	1.86991e-05	5.74991
PPP1R12B	AP	9412	14	NA	NA	0	0.8726	1	0.2714	0.296557	0.325515	7.15112	3.05922e-07	1.86991e-05	5.74991
PPP1R12B	AT	9413	27	NA	NA	0	1	0.3026	0.0419	-0.0351667	0.967353	-3.16288	0.00336917	0.030793	-3.87688
PPP1R12B	AT	9414	10.2	NA	NA	0	1	0.3026	0.0419	0.0351636	0.0326455	3.16257	0.00337191	0.0308021	-3.87765
KDM5B	ES	9420	6	5	7	0	1	0.84	0.171	-0.160858	0.506826	-6.56136	1.96992e-07	1.29991e-05	5.7636
ZC3H11A	AD	9461	2.2	2.1	3.2	0	0.9215	0.9661	0.1581	-0.115404	0.53033	-2.97247	0.00634941	0.0492141	-4.31083
PLEKHA6	AA	9471	7.1	6	7.2	0	0.8063	0.5836	0.1063	0.163627	0.813104	4.26439	0.000715972	0.00958147	-1.67539
NFASC	AT	9492	37	NA	NA	0	0.9983	0.8942	0.1728	-0.118597	0.81562	-4.92244	2.37974e-05	0.000661929	0.96099
NFASC	AT	9493	20.2	NA	NA	0	0.9983	0.8942	0.1728	0.118597	0.18438	4.92244	2.37974e-05	0.000661929	0.96099
CDK18	RI	9554	2.4	2.3	2.5	0	0.918	0.8992	0.1229	0.0651357	0.10171	3.33299	0.00245422	0.0242978	-3.45462
ELK4	AT	9560	3.2	NA	NA	0	1	0.4271	0.0589	0.0283879	0.0651758	3.22213	0.00288312	0.0274021	-3.72843
ELK4	AT	9561	5	NA	NA	0	1	0.4271	0.0589	-0.0283879	0.934824	-3.22213	0.00288312	0.0274021	-3.72843
FAM72A	AP	9575	1	NA	NA	0	1	0.9028	0.2216	-0.402948	0.504968	-10.6667	3.60719e-12	1.80209e-09	16.8392
FAM72A	AP	9576	3.1	NA	NA	0	1	0.9028	0.2216	0.402945	0.495033	10.6665	3.60844e-12	1.80209e-09	16.8388
FAM72A	AT	9577	2	NA	NA	0	1	0.7376	0.1777	-0.329833	0.416847	-12.9627	2.03582e-14	2.83241e-11	22.1246
FAM72A	AT	9578	6	NA	NA	0	1	0.8002	0.1949	0.368076	0.533617	13.4248	7.73655e-15	1.36002e-11	23.1131
FAM72A	AT	9579	3.3	NA	NA	0	1	0.3781	0.0441	-0.0382303	0.0495273	-4.46434	9.03569e-05	0.00190954	-0.360058
MAPKAPK2	AA	9592	10.1	9	10.2	0	1	0.3536	0.0624	0.0440455	0.127889	3.61643	0.000995799	0.012387	-2.70676
C1orf116	ES	9608	2	1	3	0	0.9756	0.5716	0.0813	-0.0694563	0.798055	-4.21887	0.00019208	0.00341352	-1.07697
PFKFB2	AP	9613	1	NA	NA	0	0.9686	0.89	0.1362	0.164061	0.338661	5.58019	4.23364e-06	0.000160674	2.74403
PFKFB2	AP	9614	10.1	NA	NA	0	0.9686	0.3565	0.0558	-0.0845032	0.0767562	-4.58301	7.24078e-05	0.00160635	-0.0871465
PFKFB2	AT	9616	18	NA	NA	0	1	0.5791	0.0951	-0.0652545	0.3405	-3.13838	0.00359214	0.0323631	-3.93783
PFKFB2	AT	9617	17	NA	NA	0	1	0.5791	0.0951	0.0652576	0.659498	3.13857	0.0035904	0.0323541	-3.93737
CD55	AT	9631	15	NA	NA	0	1	0.4328	0.0636	-0.0390212	0.894959	-3.69318	0.000805869	0.0105155	-2.50181
CD55	AT	9632	10.2	NA	NA	0	1	0.4328	0.0636	0.0390212	0.105041	3.69318	0.000805869	0.0105155	-2.50181
CD46	ES	9652	13	12	14	0	1	0.7945	0.1339	-0.065997	0.45242	-3.00148	0.00511974	0.0420868	-4.27366
CD34	AA	9668	9.1	8	9.2	0	0.993	0.4858	0.0687	0.0553719	0.256068	4.2378	0.000182052	0.00327231	-1.02426
LAMB3	AP	9671	3.1	NA	NA	0	0.9948	1	0.0829	0.0916848	0.0577576	3.23675	0.0027739	0.0266814	-3.69158
LAMB3	AP	9672	1	NA	NA	0	0.9948	1	0.0846	-0.0929788	0.941595	-3.28607	0.0024339	0.024151	-3.56664
RCOR3	AP	9703	1	NA	NA	0	1	0.6526	0.1038	-0.0681242	0.902389	-3.11911	0.00377728	0.0335745	-3.98558
RCOR3	AP	9704	2.1	NA	NA	0	1	0.6526	0.1038	0.0681273	0.0976121	3.11921	0.00377632	0.0335745	-3.98534
RCOR3	AT	9705	14.2	NA	NA	0	1	0.326	0.0568	0.0391606	0.177898	3.42581	0.00167381	0.0182303	-3.20761
RCOR3	AT	9708	15	NA	NA	0	1	0.326	0.0568	-0.0391606	0.822102	-3.42581	0.00167381	0.0182303	-3.20761
RCOR3	ES	9709	14.1	13	15	0	0.9948	0.864	0.1503	0.135948	0.632235	3.6238	0.000975839	0.0121836	-2.68718
NEK2	AT	9717	8	NA	NA	0	1	0.7704	0.169	0.245333	0.593303	6.88088	7.86106e-08	6.15825e-06	6.69057
NEK2	AT	9718	7.2	NA	NA	0	1	0.7704	0.169	-0.245333	0.406697	-6.88088	7.86106e-08	6.15825e-06	6.69057
ATF3	AA	9737	5.1:5.2	4	5.3	0	0.9983	0.6591	0.122	0.0543394	0.102179	3.34568	0.00207607	0.0214277	-3.41437
NSL1	AT	9742	7	NA	NA	0	1	0.2701	0.0395	0.0369121	0.932438	4.73886	4.06949e-05	0.00101675	0.428651
NSL1	AT	9743	8	NA	NA	0	1	0.2701	0.0395	-0.0369121	0.0675621	-4.73886	4.06949e-05	0.00101675	0.428651
RPS6KC1	ES	9786	2	1	4	0	0.8639	0.3699	0.0542	-0.0299077	0.976166	-3.04935	0.00527083	0.0430172	-4.13332
HLX	RI	9879	2.2	2.1	2.3	0	0.9895	0.9788	0.0907	0.0731	0.0963227	3.39709	0.00180852	0.0193575	-3.28199
AIDA	AP	9891	2	NA	NA	0	1	0.6029	0.0741	-0.0429091	0.88907	-3.25196	0.00266452	0.0258671	-3.65316
AIDA	AP	9892	1	NA	NA	0	1	0.6029	0.0741	0.0429091	0.11093	3.25196	0.00266452	0.0258671	-3.65316
SUSD4	AT	9910	8	NA	NA	0	0.9389	1	0.1323	0.0928242	0.515506	3.45284	0.00155592	0.0172328	-3.13737
SUSD4	AT	9911	12.2	NA	NA	0	0.9389	1	0.1375	-0.105127	0.425173	-3.63537	0.000945264	0.0118829	-2.65637
CAPN8	AT	9920	22	NA	NA	0	0.9895	0.7309	0.1032	-0.0774515	0.803532	-5.99925	1.00988e-06	5.11316e-05	4.11884
CAPN8	AT	9921	11	NA	NA	0	0.9895	0.7309	0.1032	0.0774515	0.196468	5.99925	1.00988e-06	5.11316e-05	4.11884
CNIH4	ES	9955	00:04:05.100000	3	5.2	0	1	0.0684	0.0108	-0.00690909	0.995197	-3.17366	0.00327531	0.0302148	-3.84998
CNIH4	AA	9956	5.1	3	5.2	0	0.9948	0.7749	0.1873	-0.1313	0.890608	-3.00269	0.00510379	0.0419882	-4.27071
CNIH4	ES	9958	4	3	5.1	0	1	0.0927	0.0151	-0.0104	0.970212	-3.79713	0.000603746	0.00847443	-2.22142
DNAH14	AT	9968	90	NA	NA	0	0.9791	0.848	0.18	-0.139117	0.213131	-3.57644	0.00126267	0.0147521	-2.83856
DNAH14	AT	9969	9	NA	NA	0	0.9791	0.848	0.1798	0.118572	0.776534	2.94176	0.0064028	0.0495305	-4.3961
ENAH	ES	9989	13	12	14	0	1	1	0.1875	0.339361	0.532047	10.7109	3.24481e-12	1.65817e-09	16.9471
TMEM63A	AP	9999	1	NA	NA	0	0.9825	1	0.1911	-0.121809	0.732153	-3.05792	0.00442732	0.0377449	-4.1362
TMEM63A	AP	10000	9.1	NA	NA	0	0.9825	1	0.1911	0.121809	0.267847	3.05792	0.00442732	0.0377449	-4.1362
ITPKB	AT	10021	3	NA	NA	0	1	0.6296	0.0869	0.0747909	0.201611	4.55264	6.99603e-05	0.0015623	-0.107473
ITPKB	AT	10022	9	NA	NA	0	1	0.6296	0.0869	-0.0747909	0.798389	-4.55264	6.99603e-05	0.0015623	-0.107473
PSEN2	ES	10034	4	3	5	0	0.993	0.4806	0.044	0.0286344	0.0380538	4.69502	4.92956e-05	0.00117742	0.265796
ADCK3	AP	10035	7	NA	NA	0	1	0.9354	0.1707	-0.125345	0.731955	-3.55877	0.00116633	0.013939	-2.85954
ADCK3	AP	10036	1	NA	NA	0	1	0.9354	0.1707	0.125342	0.268047	3.5587	0.00116655	0.013939	-2.85972
CDC42BPA	ES	10046	24	21	25	0	0.9197	0.1857	0.0196	-0.00574194	0.997219	-2.95009	0.00603921	0.0474797	-4.38693
ARF1	AD	10064	1.2	1.1	3	0	1	0.0672	0.0085	0.00836667	0.0144318	7.13913	3.76671e-08	3.35779e-06	7.43404
MRPL55	AD	10094	2.3:2.4:2.5:2.6	2.2	2.9	0	0.9913	0.9498	0.1266	-0.0561344	0.291129	-3.37484	0.00196821	0.0205607	-3.34093
GUK1	AP	10180	1	NA	NA	0	1	0.0615	0.0116	-0.0242667	0.0255273	-8.64215	6.02506e-10	1.26694e-07	11.6273
GUK1	ES	10185	11.1:11.2	9.2	12	0	1	0.1152	0.0193	-0.0121364	0.965668	-3.47716	0.00145669	0.0163898	-3.07392
GUK1	AA	10188	7.1	6	7.2	0	1	0.1165	0.0158	-0.0171394	0.953588	-4.40752	0.00010648	0.00216148	-0.521958
TRIM11	AT	10208	6	NA	NA	0	1	0.458	0.0474	-0.0313	0.949371	-3.31546	0.00225068	0.022812	-3.49174
TRIM11	AT	10209	5.2	NA	NA	0	1	0.458	0.0474	0.0313	0.0506288	3.31546	0.00225068	0.022812	-3.49174
TAF5L	AT	10228	5	NA	NA	0	1	0.5661	0.0688	-0.0399939	0.832439	-3.01767	0.00491126	0.0407938	-4.23437
TAF5L	AT	10229	4.2	NA	NA	0	1	0.4994	0.0641	0.0404303	0.159903	3.13421	0.00363147	0.0325981	-3.94818
ARV1	AT	10261	6	NA	NA	0	1	0.2443	0.0382	0.0195879	0.0530667	3.67487	0.000847696	0.0109366	-2.55086
ARV1	AT	10262	7	NA	NA	0	1	0.2443	0.0382	-0.0195879	0.946933	-3.67487	0.000847696	0.0109366	-2.55086
NTPCR	AT	10316	5	NA	NA	0	1	0.4385	0.0732	0.0641121	0.0981803	7.94176	4.00338e-09	5.71235e-07	9.7044
NTPCR	AT	10317	6	NA	NA	0	1	0.4385	0.0732	-0.0641121	0.90182	-7.94176	4.00338e-09	5.71235e-07	9.7044
NTPCR	ES	10319	2	1	3	1	0.808	0.7382	0.0999	0.0526077	0.88884	3.38315	0.00231016	0.0232487	-3.33976
MLK4	AT	10329	10	NA	NA	0	1	0.3425	0.0361	0.0203212	0.921588	3.02528	0.00481615	0.0401556	-4.21588
MLK4	AT	10330	6.2	NA	NA	0	1	0.3425	0.0361	-0.0203212	0.0784121	-3.02528	0.00481615	0.0401556	-4.21588
COA6	AP	10335	1	NA	NA	0	0.9983	0.4521	0.0581	0.0418562	0.845937	2.91721	0.00644828	0.049761	-4.47036
COA6	AP	10336	2.1	NA	NA	0	0.9983	0.4521	0.0581	-0.0418562	0.154063	-2.91721	0.00644828	0.049761	-4.47036
IRF2BP2	AD	10338	1.2	1.1	2	0	1	0.4626	0.0709	-0.0477394	0.537445	-3.65753	0.000889253	0.0113607	-2.59723
GPR137B	AT	10366	4.2	NA	NA	0	1	0.3113	0.0189	0.0065	0.00728333	3.00134	0.00512151	0.0420868	-4.27398
GPR137B	AT	10367	7	NA	NA	0	1	0.3113	0.0189	-0.0065	0.992717	-3.00134	0.00512151	0.0420868	-4.27398
LGALS8	ES	10382	11	10.1	12	0	1	0.9472	0.1674	0.126476	0.496414	4.93629	2.28513e-05	0.000640069	1.0013
OPN3	ES	10431	3	1	4	1	0.986	0.4997	0.0831	-0.0589848	0.677156	-3.6388	0.000936373	0.0117972	-2.64722
SDCCAG8	ES	10458	6	5	7	0	1	0.3761	0.0663	-0.0506788	0.907948	-3.8747	0.000485991	0.00711944	-2.01024
COX20	ES	10475	3	1	4	1	0.9965	0.5245	0.0783	0.0695909	0.787692	4.16209	0.000215435	0.00374375	-1.21485
ZNF670	AT	10507	4	NA	NA	0	1	0.6863	0.1371	-0.0779788	0.952829	-4.23668	0.00017405	0.00316867	-1.00547
ZNF670	AT	10509	11	NA	NA	0	1	0.5705	0.1165	0.0636455	0.0381682	4.10856	0.000250948	0.00425816	-1.36443
ZNF669	ES	10511	3	2.2	4	0	0.9721	0.253	0.0412	0.0512241	0.966413	3.73269	0.000834739	0.0108088	-2.43598
PGBD2	AA	10573	4.1	2	4.2	0	0.9773	0.5785	0.1133	0.10458	0.847678	3.12805	0.00392816	0.0345408	-3.9559
ZMYND11	AT	10584	17.2	NA	NA	0	1	0.1092	0.0122	0.00864848	0.0180182	4.1649	0.000213718	0.00371831	-1.207
ZMYND11	AT	10585	18	NA	NA	0	1	0.1092	0.0122	-0.00864242	0.981982	-4.16271	0.000215053	0.00373859	-1.21311
ZMYND11	ES	10590	9	8	10	0	0.993	0.0933	0.0117	0.0107697	0.990648	3.11401	0.00382778	0.0338627	-3.9982
PFKP	AP	10620	2	NA	NA	0	1	0.1637	0.0185	-0.0207697	0.0234212	-3.29389	0.00238382	0.0237668	-3.54675
IL15RA	AP	10674	1	NA	NA	0	0.9703	0.8552	0.1594	-0.118847	0.659486	-3.75057	0.000711	0.0095342	-2.3567
IL15RA	AP	10675	2	NA	NA	0	0.9703	0.8552	0.1594	0.11885	0.340512	3.75054	0.000711076	0.0095342	-2.35681
ITIH5	AT	10715	16.2	NA	NA	0	1	0.7661	0.1575	-0.209991	0.592989	-9.08283	1.88948e-10	5.12587e-08	12.8064
ITIH5	AT	10716	13	NA	NA	0	1	0.7661	0.1575	0.209991	0.407011	9.08283	1.88948e-10	5.12587e-08	12.8064
ATP5C1	ES	10726	9	8.1	10	0	1	0.4211	0.0635	0.0984364	0.848691	6.65227	1.51552e-07	1.05386e-05	6.02805
ATP5C1	ES	10727	2	1	3	0	1	0.0714	0.0094	-0.00517879	0.988453	-3.0737	0.00425022	0.0366755	-4.09752
CELF2	AP	10729	1	NA	NA	0	0.8935	0.5541	0.079	-0.0875806	0.0920609	-5.10485	1.64132e-05	0.000489366	1.38857
CELF2	RI	10739	16.2	16.1	16.3	0	1	0.9426	0.1766	-0.120179	0.393689	-5.4656	4.831e-06	0.000180232	2.55029
NUDT5	AT	10767	9.5	NA	NA	0	1	0.3726	0.0472	0.030497	0.0678485	3.55686	0.00117245	0.0139904	-2.86459
NUDT5	AT	10768	11	NA	NA	0	1	0.6113	0.0822	-0.0465182	0.87958	-3.12528	0.00371704	0.0331621	-3.97031
CAMK1D	AT	10772	11	NA	NA	0	1	0.5997	0.0988	-0.0677636	0.732094	-4.60779	5.96062e-05	0.0013715	0.0508459
CAMK1D	AT	10773	10.2	NA	NA	0	1	0.5997	0.0988	0.0677636	0.267906	4.60779	5.96062e-05	0.0013715	0.0508459
FRMD4A	ES	10815	30	29	31	1	0.836	0.5946	0.1101	0.0722143	0.090318	3.53803	0.00144717	0.0163078	-2.94375
FAM107B	AP	10818	7	NA	NA	0	0.986	0.7148	0.1516	0.116618	0.102	4.42842	0.000100245	0.00206156	-0.462474
VIM	AP	10927	1	NA	NA	0	0.8866	0.8697	0.1719	-0.146712	0.295603	-3.27348	0.00303753	0.0285486	-3.60427
VIM	AP	10928	3.1	NA	NA	0	0.8866	0.8697	0.1719	0.146712	0.704397	3.27348	0.00303753	0.0285486	-3.60427
STAM	ES	10937	3	2	4	0	0.8325	0.3642	0.063	0.0561926	0.0711276	2.98183	0.00605929	0.0475864	-4.29341
KIAA1217	AP	10993	9	NA	NA	0	0.986	0.4578	0.0827	0.0830424	0.0986303	3.62701	0.000967255	0.0121074	-2.67863
KIAA1217	AP	10994	10	NA	NA	0	0.986	1	0.1714	0.128782	0.596752	3.32722	0.00218114	0.0222716	-3.46168
KIAA1217	AP	10995	3	NA	NA	0	0.986	0.7047	0.1126	-0.226482	0.187074	-9.94626	2.09654e-11	8.21398e-09	15.045
KIAA1217	RI	11000	25.2	25.1	25.3	0	1	0.9444	0.1882	0.226215	0.378723	7.56232	1.14489e-08	1.30352e-06	8.63931
KIAA1217	ES	11001	24	23	25.1	0	1	0.2727	0.0189	0.0209152	0.981561	3.9869	0.000354354	0.00558578	-1.70202
KIAA1217	ES	11002	23:24:00	22	25.1	0	1	0.5133	0.0954	0.131724	0.842941	5.76491	2.00604e-06	8.80733e-05	3.43016
KIAA1217	ES	11006	22	21	25.1	0	0.8813	0.461	0.0767	-0.0424259	0.957243	-2.99796	0.00582559	0.0463055	-4.256
KIAA1217	ES	11009	12	11	13	0	0.9843	0.9212	0.2089	-0.296803	0.683541	-7.65119	8.93805e-09	1.05594e-06	8.89014
PRTFDC1	AT	11016	4	NA	NA	0	1	0.6027	0.0956	0.0705455	0.17997	3.90948	0.000440766	0.00657752	-1.91503
PRTFDC1	AT	11017	10	NA	NA	0	1	0.6027	0.0956	-0.0705455	0.82003	-3.90948	0.000440766	0.00657752	-1.91503
ABI1	ES	11034	11.1:11.2	9	12	0	0.9948	0.661	0.0828	-0.0464438	0.949217	-3.39772	0.00185172	0.0196711	-3.2823
ABI1	ES	11039	12	9	13	0	0.9302	0.8862	0.152	0.100678	0.105858	3.21943	0.00336952	0.030793	-3.73246
ABI1	ES	11041	11.1:11.2	9	13	0	0.9983	0.6627	0.1128	-0.0673879	0.756033	-3.29755	0.00236071	0.0235985	-3.53743
ABI1	ES	11048	5	4	7	0	0.9965	0.8859	0.1555	-0.265385	0.412229	-9.97031	1.97475e-11	7.96205e-09	15.106
YME1L1	AA	11061	3.1:3.2	2	3.3	0	1	0.7966	0.078	0.0325424	0.0487712	4.45939	9.16606e-05	0.00192557	-0.37419
ARMC4	ES	11085	24	23	25	0	0.9913	0.7506	0.1592	0.13863	0.792403	3.4589	0.00153059	0.0169993	-3.12157
WAC	AP	11099	1	NA	NA	0	1	0.6922	0.0869	-0.0604576	0.341205	-3.44056	0.00160843	0.0176682	-3.1693
SVIL	ES	11113	21	20	22	0	0.9284	0.6331	0.069	-0.0951281	0.08244	-6.27143	5.21414e-07	2.93783e-05	4.8161
SVIL	ES	11114	16	15	17	0	0.9302	0.4435	0.0742	-0.130893	0.117585	-6.68426	2.6518e-07	1.65457e-05	5.60896
MTPAP	AP	11118	3	NA	NA	0	1	0.7044	0.0908	-0.0194485	0.985088	-3.04132	0.00462118	0.038899	-4.17678
MTPAP	AP	11119	1	NA	NA	0	1	0.7044	0.0908	0.0194485	0.0149121	3.04132	0.00462118	0.038899	-4.17678
NRP1	AT	11195	13	NA	NA	0	1	0.1466	0.0178	0.00725152	0.00962879	3.39043	0.00184126	0.0195978	-3.29922
NRP1	AT	11196	15.2	NA	NA	0	1	0.2129	0.0283	0.0168606	0.0238485	3.36648	0.00196355	0.0205312	-3.36094
NRP1	AT	11197	11.2	NA	NA	0	1	0.1016	0.0134	0.00655455	0.0149318	2.92703	0.00619048	0.0483145	-4.45273
NRP1	AT	11198	20	NA	NA	0	1	0.3583	0.0521	-0.0350818	0.94652	-4.45847	9.19061e-05	0.00192981	-0.376829
NRP1	AD	11200	14.2	14.1	15.1	0	0.9983	0.3928	0.0538	0.0332	0.779776	3.50465	0.00135184	0.01552	-3.00195
NRP1	ES	11202	14.1	12	15.1	0	0.993	0.5777	0.0847	-0.0519303	0.912492	-3.28753	0.00242452	0.0240797	-3.56294
PARD3	AT	11207	23	NA	NA	0	1	0.7588	0.1426	0.134758	0.390755	5.5356	3.93286e-06	0.000151748	2.75598
PARD3	AT	11208	28	NA	NA	0	1	0.6561	0.1335	-0.191427	0.469571	-8.02965	3.14614e-09	4.64229e-07	9.94884
PARD3	ES	11211	20	19.3	21	0	1	0.6602	0.1044	0.244573	0.803917	9.53592	5.88841e-11	2.10393e-08	13.9931
PARD3	ES	11216	13	12	14	0	0.9983	0.7973	0.1301	-0.16973	0.58928	-7.09155	4.31145e-08	3.76699e-06	7.29748
PARD3	ES	11217	5	4	7	0	0.9948	0.437	0.0692	-0.0468455	0.866277	-3.37646	0.00191165	0.0201616	-3.33523
CREM	AT	11237	16.2	NA	NA	0	1	0.7672	0.1284	-0.0959606	0.678247	-3.79631	0.000605131	0.00848574	-2.22365
CREM	AT	11238	10.2	NA	NA	0	1	0.7808	0.1275	0.093097	0.308821	3.69742	0.00079646	0.0104144	-2.49042
ZNF248	AT	11301	7.3	NA	NA	0	1	0.6357	0.1106	-0.0560576	0.79708	-3.53389	0.00124835	0.0146261	-2.92514
ZNF248	AT	11303	9	NA	NA	0	1	0.6357	0.1106	0.0560576	0.20292	3.53389	0.00124835	0.0146261	-2.92514
RASGEF1A	AP	11320	3	NA	NA	0	0.7888	0.977	0.3388	-0.419347	0.652586	-4.27301	0.000703816	0.0094707	-1.65793
HNRNPF	AP	11322	2	NA	NA	0	1	0.7483	0.099	-0.0846061	0.14173	-3.08256	0.00415376	0.0359632	-4.07575
HNRNPF	AP	11324	4	NA	NA	0	1	0.2852	0.0444	-0.0643909	0.141562	-6.05837	8.4963e-07	4.40325e-05	4.29242
HNRNPF	AP	11325	3	NA	NA	0	1	0.7086	0.1019	0.108009	0.412208	5.41642	5.58212e-06	0.000202412	2.40585
HNRNPF	AP	11326	5.1	NA	NA	0	1	0.5132	0.0819	0.0567848	0.193417	3.49064	0.00140432	0.0159848	-3.03866
CXCL12	AT	11343	3.3	NA	NA	0	1	0.7532	0.1101	0.0726242	0.672779	3.30613	0.0023074	0.0232262	-3.51557
CXCL12	AT	11344	4	NA	NA	0	1	0.2512	0.0431	-0.0581424	0.0630955	-7.05089	4.8397e-08	4.122e-06	7.18065
ALOX5	ES	11359	13	12	14	0	1	0.2852	0.0333	-0.0222212	0.97042	-3.43941	0.00161345	0.0177005	-3.1723
2020-03-08	ES	11362	7	6	8	0	0.9808	0.9696	0.1591	0.121385	0.18022	3.83234	0.000547209	0.00785906	-2.12577
ZFAND4	AT	11367	13	NA	NA	0	1	0.7399	0.1116	-0.0766303	0.720936	-3.65491	0.000895718	0.0114201	-2.60424
FAM21C	ES	11374	26	25	27	0	0.9721	0.2447	0.0271	0.0381031	0.967223	4.51681	8.22156e-05	0.00177379	-0.2405
SYT15	AT	11433	8.4	NA	NA	0	1	0.6403	0.1104	-0.120818	0.725036	-6.61431	1.69072e-07	1.15558e-05	5.91771
SYT15	AT	11435	9	NA	NA	0	1	0.6403	0.1104	0.120818	0.274964	6.61431	1.69072e-07	1.15558e-05	5.91771
SYT15	RI	11436	8.3	8.2	8.4	0	0.9983	0.4166	0.0647	0.0492182	0.921336	4.08454	0.000268688	0.0044627	-1.43133
SYT15	AA	11437	8.1	7	8.2	0	1	0.6041	0.112	0.0811333	0.820861	2.94292	0.00594547	0.0470033	-4.41471
ANXA8L2	ES	11458	05:06:00	4	7	0	0.7941	0.2274	0.0221	0.00434231	0.995712	3.94365	0.00055264	0.00791637	-1.94253
ARHGAP22	AP	11480	8	NA	NA	0	0.9494	0.481	0.0698	-0.0701077	0.0546241	-3.6735	0.00110734	0.013388	-2.62428
ARHGAP22	AP	11484	7	NA	NA	0	0.9494	0.3695	0.0723	-0.105731	0.0793897	-5.00707	3.42693e-05	0.000884881	0.822605
ARHGAP22	AP	11485	3	NA	NA	0	0.9494	0.9206	0.207	0.136842	0.445766	2.97177	0.00636011	0.0492751	-4.31243
VSTM4	AT	11498	9	NA	NA	0	1	0.6109	0.1005	-0.0556879	0.864647	-4.48386	8.53955e-05	0.00182448	-0.304335
VSTM4	AT	11499	3	NA	NA	0	1	0.6109	0.1005	0.0556879	0.135353	4.48386	8.53955e-05	0.00182448	-0.304335
FAM21A	ES	11559	28	27	29	0	1	0.2342	0.0309	0.0223606	0.963498	3.24733	0.00269737	0.0260995	-3.66486
FAM21A	ES	11561	1 day, 3:28:00	26	29	0	1	0.1751	0.0171	0.0264212	0.976935	5.63375	2.94789e-06	0.000121761	3.0445
PRKG1	AP	11579	2	NA	NA	0	0.9372	0.9463	0.157	0.164763	0.249481	5.66706	3.70281e-06	0.000144778	2.91175
PRKG1	AP	11580	1	NA	NA	0	0.9372	0.9463	0.1572	-0.170607	0.747737	-6.01679	1.39784e-06	6.67016e-05	3.89183
FAM13C	AT	11827	15.2	NA	NA	0	1	0.5837	0.0468	0.0188394	0.0117379	3.52855	0.00126666	0.0147697	-2.93919
FAM13C	AT	11829	16	NA	NA	0	1	0.6002	0.0649	-0.0238727	0.984761	-3.18878	0.00314777	0.0292965	-3.81216
ANK3	AP	11842	1	NA	NA	0	0.9634	1	0.2732	-0.294679	0.782964	-6.81716	9.43509e-08	7.17393e-06	6.50628
ANK3	AP	11845	28	NA	NA	0	0.9634	1	0.2665	0.256712	0.190129	6.69423	1.34303e-07	9.5662e-06	6.14994
ANK3	AT	11846	50	NA	NA	0	1	0.5874	0.0783	-0.0466667	0.954424	-3.32627	0.00218668	0.0223177	-3.46411
ANK3	AT	11847	29.2	NA	NA	0	1	0.5874	0.0783	0.0466667	0.0455758	3.32627	0.00218668	0.0223177	-3.46411
ANK3	ES	11849	42	41	43	0	0.9459	1	0.0736	0.0189667	0.0134955	3.04405	0.00458879	0.0387377	-4.17012
ARID5B	AP	11865	5	NA	NA	0	0.9232	1	0.1565	-0.098775	0.857817	-3.19383	0.00317214	0.0294548	-3.79784
ARID5B	AP	11866	1	NA	NA	0	0.9232	1	0.1565	0.098775	0.142183	3.19383	0.00317214	0.0294548	-3.79784
RTKN2	AT	11871	14	NA	NA	0	1	0.5801	0.0954	0.058797	0.170895	2.99222	0.00524263	0.0428497	-4.29606
ZNF365	AT	11877	15	NA	NA	0	1	0.9969	0.2061	-0.223961	0.375532	-6.78844	1.0245e-07	7.63134e-06	6.42313
ZNF365	AT	11879	5	NA	NA	0	1	0.9886	0.2043	0.222652	0.593159	6.63816	1.57838e-07	1.09067e-05	5.98705
DNAJC12	ES	11904	2	1	3	0	0.9511	0.9851	0.2021	-0.201396	0.320923	-3.78352	0.000796106	0.0104129	-2.33224
CCAR1	AD	11960	1.2	1.1	2	0	0.9668	0.4835	0.0779	0.0676129	0.121547	3.46067	0.00160921	0.0176715	-3.12373
DDX50	ES	11971	2.1:2.2	1	3	0	0.9843	0.5847	0.0852	-0.0734576	0.204814	-3.28578	0.00243581	0.0241645	-3.56739
SAR1A	ES	12040	00:03:04.100000	1	4.2	0	1	0.0224	0.0035	-0.00285455	0.997997	-2.94615	0.00589696	0.0467291	-4.40699
UNC5B	ES	12054	8	7	9	0	0.7749	0.6962	0.1289	0.130621	0.800845	3.58358	0.0015244	0.0169649	-2.87149
CDH23	AT	12058	15.2	NA	NA	0	1	0.8715	0.1815	0.147152	0.334052	5.09066	1.45335e-05	0.000441966	1.45142
CDH23	AT	12060	72	NA	NA	0	1	0.8072	0.1475	-0.143364	0.380897	-4.23377	0.000175509	0.00318731	-1.01367
ASCC1	ES	12086	5	4	6	0	0.9825	0.3212	0.0283	-0.0222576	0.0314621	-4.13726	0.000231249	0.00398234	-1.28431
DNAJB12	RI	12090	9.3	9.2	9.4	0	1	0.6126	0.1055	-0.0590242	0.460467	-3.48901	0.00141057	0.0160268	-3.04293
P4HA1	ME	12122	10|11	9	12.1	0	1	0.4767	0.0829	-0.0525879	0.44857	-3.03693	0.00467375	0.0392288	-4.18749
MRPS16	AT	12135	5	NA	NA	0	1	0.2971	0.0465	0.0334394	0.125023	3.70198	0.000786477	0.01033	-2.47819
MRPS16	AT	12136	3.2	NA	NA	0	1	0.2971	0.0465	-0.0334394	0.874977	-3.70198	0.000786477	0.01033	-2.47819
PPP3CB	AT	12153	17	NA	NA	0	1	0.5556	0.1114	-0.15763	0.695806	-8.70923	5.04195e-10	1.09255e-07	11.8083
PPP3CB	AT	12154	15.2	NA	NA	0	1	0.5556	0.1114	0.15763	0.304194	8.70889	5.04659e-10	1.09255e-07	11.8074
USP54	ES	12165	23	22	24	0	1	0.6591	0.0961	0.0715727	0.681686	3.93063	0.000415302	0.00628501	-1.85698
USP54	ES	12166	19	18	20	0	0.9808	0.4149	0.066	0.0594697	0.885668	3.87901	0.000480141	0.00704549	-1.99844
SEC24C	ES	12178	8	7	9	0	0.9825	0.475	0.0753	0.0580848	0.121358	4.47949	8.6482e-05	0.00184456	-0.316811
CAMK2G	ES	12241	19.1:19.2	18	21	0	1	0.7439	0.1059	-0.123218	0.418836	-6.29769	4.22971e-07	2.44589e-05	4.99386
CAMK2G	ES	12249	13	12	14	0	0.9878	0.2412	0.0378	-0.0312438	0.0662415	-3.03063	0.00483603	0.0402954	-4.19865
RPS24	ES	12295	5.1:5.2	4	6	0	1	0.9815	0.2163	-0.180742	0.728644	-4.82381	3.17555e-05	0.000828628	0.674579
RPS24	ES	12296	5.2	4	6	0	1	0.7852	0.1592	-0.17193	0.792702	-7.21818	3.01108e-08	2.79179e-06	7.66048
ZMIZ1	ES	12300	24	23	25	0	0.9948	0.5937	0.0898	0.104587	0.688069	6.62021	1.9322e-07	1.28079e-05	5.8171
SFTPA1	ME	12321	2|3	1	4	0	0.9302	1	0.0952	0.0373156	0.840369	3.07524	0.00431327	0.0370089	-4.09021
SFTPA1	ES	12323	03:04:00	1	5	0	0.918	0.7171	0.0641	-0.0277719	0.978162	-2.95032	0.00593163	0.0469192	-4.39165
FAM213A	AA	12365	3.2	2	3.3	0	0.9948	0.5904	0.0821	-0.107669	0.68514	-6.54683	2.37909e-07	1.51093e-05	5.60713
TSPAN14	AP	12366	1	NA	NA	0	0.9738	1	0.1589	-0.135794	0.725409	-3.22231	0.00288176	0.027401	-3.72798
TSPAN14	AP	12367	2	NA	NA	0	0.9738	1	0.1589	0.135794	0.274591	3.22231	0.00288176	0.027401	-3.72798
CCSER2	AT	12407	3.2	NA	NA	0	1	0.3085	0.0432	0.0205879	0.0317485	2.96967	0.00555385	0.0446917	-4.35048
CCSER2	AT	12408	12	NA	NA	0	1	0.3085	0.0432	-0.0205879	0.968252	-2.96967	0.00555385	0.0446917	-4.35048
CCSER2	ES	12409	11	10	12	0	0.9895	0.7807	0.125	-0.24607	0.324632	-8.65085	5.88739e-10	1.24995e-07	11.6508
LDB3	AT	12421	10	NA	NA	0	1	0.7006	0.1393	-0.1324	0.260039	-4.38797	0.000112661	0.00225852	-0.577556
LDB3	AT	12422	17	NA	NA	0	1	0.7006	0.1393	0.132397	0.739962	4.38785	0.0001127	0.00225852	-0.577897
ADIRF	ES	12443	2	1	3	1	0.8534	0.4271	0.0603	-0.0568042	0.943567	-4.46518	0.00016709	0.00306225	-0.685016
PAPSS2	ES	12457	9	8	10	0	0.9546	0.6283	0.1316	-0.180013	0.212581	-12.0348	3.85057e-13	2.91767e-10	19.2216
PANK1	AP	12493	1	NA	NA	0	0.8778	0.9445	0.2446	0.363243	0.523471	6.11197	4.96118e-06	0.00018353	3.0151
PANK1	AP	12494	2	NA	NA	0	0.8778	0.9445	0.2446	-0.363243	0.476529	-6.11197	4.96118e-06	0.00018353	3.0151
EXOC6	AP	12540	3	NA	NA	0	0.9668	0.7427	0.1673	0.39769	0.68163	14.6505	2.2209e-15	6.41611e-12	24.4973
EXOC6	AP	12541	1	NA	NA	0	0.9668	0.7427	0.1673	-0.39769	0.31837	-14.6505	2.2209e-15	6.41611e-12	24.4973
FFAR4	AT	12553	4	NA	NA	0	1	0.1894	0.0144	0.00432727	0.997836	3.3495	0.00205498	0.02127	-3.40459
FFAR4	AT	12554	5	NA	NA	0	1	0.1894	0.0144	-0.00432727	0.00216364	-3.3495	0.00205498	0.02127	-3.40459
SLC35G1	AT	12567	5.2	NA	NA	0	1	0.7862	0.1123	-0.0787879	0.536779	-3.80011	0.000598738	0.00842566	-2.21332
SLC35G1	AT	12570	3	NA	NA	0	1	0.7862	0.1171	0.0804939	0.430135	3.77744	0.000637795	0.00883664	-2.27476
PLCE1	AT	12578	34	NA	NA	0	1	0.4426	0.0777	-0.111648	0.426524	-11.1353	1.18991e-12	7.16358e-10	17.9706
PLCE1	AT	12579	33.2	NA	NA	0	1	0.4426	0.0777	0.111648	0.573476	11.1353	1.18991e-12	7.16358e-10	17.9706
SORBS1	ES	12636	14:16:00	13	17	0	0.8953	0.9835	0.2422	0.204332	0.272641	4.20555	0.000209571	0.00366357	-1.13631
ZDHHC16	ES	12704	9	8.2	10	0	0.9983	0.5247	0.0675	-0.0655485	0.895502	-6.08442	7.8738e-07	4.15911e-05	4.36888
PI4K2A	AP	12728	1	NA	NA	0	0.986	0.9448	0.1508	-0.0902091	0.149132	-3.15404	0.00344802	0.0313152	-3.89889
PI4K2A	AP	12729	3	NA	NA	0	0.986	0.9448	0.1508	0.0902061	0.850867	3.15392	0.00344917	0.0313152	-3.89921
MORN4	AT	12730	2.2	NA	NA	0	1	0.6671	0.1126	0.0578788	0.188194	3.99953	0.000341924	0.00541688	-1.66713
MORN4	AT	12731	5	NA	NA	0	1	0.6671	0.1126	-0.0578788	0.811806	-3.99953	0.000341924	0.00541688	-1.66713
HPS1	AT	12760	10.2	NA	NA	0	1	0.6199	0.102	0.130967	0.201129	7.55158	1.17976e-08	1.32987e-06	8.60893
HPS1	AT	12761	20	NA	NA	0	1	0.6199	0.102	-0.130964	0.79887	-7.55146	1.18015e-08	1.32987e-06	8.60859
CUTC	ES	12778	7	6	8	0	0.9913	0.6155	0.1004	-0.0721188	0.848346	-4.28907	0.000157412	0.00292514	-0.881187
DNMBP	AP	12781	1	NA	NA	0	0.9983	0.7765	0.1333	-0.117491	0.183718	-3.94145	0.000402841	0.00614298	-1.82725
DNMBP	AP	12782	5	NA	NA	0	0.9983	0.7765	0.1333	0.117488	0.816283	3.94129	0.000403021	0.00614359	-1.82769
POLL	RI	12886	6.2	6.1	6.3	0	1	1	0.1375	0.101124	0.162208	4.2079	0.000188998	0.00337904	-1.08638
POLL	AD	12887	5.2	5.1	6.1	0	0.9948	0.56	0.0772	0.0724188	0.857677	3.29241	0.00244892	0.0242782	-3.55053
LDB1	AP	12934	2	NA	NA	0	1	0.8124	0.164	0.254382	0.291818	9.02972	2.16999e-10	5.71057e-08	12.6656
LDB1	AP	12935	1	NA	NA	0	1	0.8124	0.164	-0.254382	0.708182	-9.02972	2.16999e-10	5.71057e-08	12.6656
PPRC1	ES	12938	08:09:00	7	10	0	1	0.2495	0.0397	0.0719909	0.92902	6.38603	3.27252e-07	1.98648e-05	5.25217
NOLC1	AA	12942	3.1	2	3.2	0	0.9948	0.7478	0.0771	-0.0595515	0.5477	-3.25696	0.00262947	0.0256173	-3.64051
NFKB2	AA	12948	24.1	23	24.2	0	0.9913	0.506	0.0693	-0.0506625	0.451803	-3.70573	0.000804243	0.0105037	-2.47642
NT5C2	ES	12992	5	4	6	0	0.9878	0.7026	0.0893	-0.0879424	0.205783	-6.28486	4.39048e-07	2.52556e-05	4.95632
USMG5	ES	13004	2.2	1	4	0	1	0.3014	0.0413	0.0298152	0.0720591	3.60794	0.00101931	0.0125833	-2.72934
CALHM2	AA	13012	4.1	3.2	4.2	0	0.9965	1	0.1395	0.0928091	0.421992	3.44447	0.00159154	0.0175169	-3.15914
SH3PXD2A	AT	13024	18	NA	NA	0	1	0.1537	0.0211	-0.0260606	0.0446	-5.82248	1.69446e-06	7.74098e-05	3.59941
SH3PXD2A	AT	13025	17	NA	NA	0	1	0.1537	0.0211	0.0260636	0.955398	5.82345	1.68964e-06	7.72699e-05	3.60227
SLK	ES	13030	13	12	14	0	1	1	0.1598	0.232436	0.6518	8.90546	3.00427e-10	7.50181e-08	12.3348
SFR1	AP	13035	2	NA	NA	0	0.9634	0.9602	0.2016	0.18716	0.411824	4.14924	0.00025784	0.00434325	-1.31284
SFR1	AP	13037	1	NA	NA	0	0.9634	0.9742	0.1826	-0.17857	0.504067	-3.92723	0.000473852	0.00697759	-1.90998
WDR96	AT	13039	11.2	NA	NA	0	0.8604	1	0.1409	0.09316	0.0715069	4.00914	0.000495076	0.00723084	-1.80044
WDR96	AT	13040	38	NA	NA	0	0.8604	1	0.2047	-0.159472	0.880988	-4.13116	0.000362347	0.00568933	-1.49185
GSTO1	AP	13044	2	NA	NA	0	0.9965	0.6796	0.0342	0.0063875	0.990745	4.06557	0.000295974	0.00481383	-1.50128
GSTO1	AP	13045	1	NA	NA	0	0.9965	0.6796	0.0342	-0.0063875	0.00925538	-4.06557	0.000295974	0.00481383	-1.50128
ADD3	AP	13075	2	NA	NA	0	0.9616	0.5296	0.1007	0.0781935	0.811055	4.81135	3.78707e-05	0.000960381	0.55595
ADD3	AP	13076	1	NA	NA	0	0.9616	0.5296	0.1007	-0.0781935	0.188945	-4.81135	3.78707e-05	0.000960381	0.55595
ADD3	ES	13077	15	14	16	0	0.9913	0.8932	0.1987	0.297394	0.507785	9.15547	1.56451e-10	4.35171e-08	12.9985
MXI1	AP	13079	3	NA	NA	0	0.993	0.9842	0.2133	-0.321769	0.696915	-8.50374	1.12364e-09	2.06619e-07	11.0342
MXI1	AP	13080	1	NA	NA	0	0.993	1	0.2038	0.279413	0.247355	7.88418	5.83726e-09	7.75033e-07	9.36017
ACSL5	AP	13109	2	NA	NA	0	0.9983	0.5788	0.0747	0.054097	0.0793667	3.17791	0.00323893	0.0299609	-3.83935
ACSL5	AP	13111	1	NA	NA	0	0.9983	0.7266	0.1109	-0.0843152	0.124482	-4.27482	0.00015602	0.00291653	-0.897995
TCF7L2	ES	13141	17	14	19	0	0.9372	0.5953	0.1198	0.107689	0.762515	3.36012	0.00228979	0.0231178	-3.38776
TCF7L2	AD	13150	9.3	9.2	10.1	0	0.9756	0.4054	0.0652	-0.0647387	0.8873	-4.2616	0.000179136	0.00323181	-0.981869
TCF7L2	ES	13155	6.2	5	8	0	0.9407	0.7935	0.099	0.0466724	0.118084	3.14206	0.00388061	0.0342458	-3.92002
TCF7L2	ES	13156	4	3	5	0	0.9773	0.8771	0.1428	0.11755	0.567968	3.82759	0.000574828	0.00815184	-2.14982
DCLRE1A	AP	13181	1	NA	NA	0	0.8464	0.7784	0.1721	0.103848	0.137795	2.98987	0.00624856	0.0486211	-4.26713
DCLRE1A	AP	13182	2.1	NA	NA	0	0.8464	0.7784	0.1721	-0.103848	0.862205	-2.98987	0.00624856	0.0486211	-4.26713
C10orf118	AT	13185	3.2	NA	NA	0	1	0.4486	0.0648	0.0445515	0.0722879	4.52313	7.62123e-05	0.00167051	-0.192022
C10orf118	AT	13186	17	NA	NA	0	1	0.4486	0.0648	-0.0445515	0.927712	-4.52313	7.62123e-05	0.00167051	-0.192022
ABLIM1	AA	13208	18.1	17	18.2	0	0.8988	0.8082	0.141	-0.240503	0.259528	-8.94261	8.77538e-10	1.69149e-07	11.4196
ABLIM1	ES	13209	16	15	17	0	0.9354	0.6908	0.1215	-0.210722	0.264632	-9.14829	2.1321e-10	5.71057e-08	12.7255
KIAA1598	AT	13240	21	NA	NA	0	1	0.0818	0.013	-0.00777879	0.0199348	-3.0879	0.00409667	0.035574	-4.06263
FAM45A	AA	13256	2.1	1	2.2	0	0.9511	0.922	0.1317	-0.104693	0.575687	-3.90629	0.00050167	0.007315	-1.9658
SFXN4	ES	13257	4	3	5	0	0.9913	0.689	0.1092	-0.0447219	0.919635	-3.25939	0.00267152	0.0258863	-3.63379
MCMBP	AD	13277	9.2	9.1	10	0	0.9983	0.6986	0.0652	0.0454697	0.347111	3.41692	0.00171446	0.0185721	-3.23068
FGFR2	AT	13296	26	NA	NA	0	1	0.867	0.1488	0.130576	0.228961	6.78915	1.02243e-07	7.63134e-06	6.42518
FGFR2	AT	13298	27	NA	NA	0	1	0.3508	0.0543	-0.0381788	0.128814	-3.56815	0.00113679	0.0136773	-2.83477
FGFR2	AT	13300	28.2	NA	NA	0	1	0.7365	0.1248	-0.0940909	0.639745	-5.47219	4.7384e-06	0.000177379	2.56964
NSMCE4A	AP	13328	1	NA	NA	0	1	0.7681	0.1126	-0.0911121	0.78192	-4.49239	8.33113e-05	0.00178978	-0.279948
NSMCE4A	AP	13329	2	NA	NA	0	1	0.7681	0.1126	0.0911121	0.21808	4.49239	8.33113e-05	0.00178978	-0.279948
TACC2	AP	13333	6	NA	NA	0	0.9808	1	0.1788	0.150506	0.740189	3.85774	0.000509657	0.00741561	-2.05656
TACC2	AP	13337	1	NA	NA	0	0.9808	0.9329	0.1228	-0.0849606	0.0917106	-3.25379	0.0026516	0.0257873	-3.64852
TACC2	AA	13342	15.1	13	15.2	0	0.9913	0.5799	0.0858	-0.0653	0.950702	-3.65761	0.000889061	0.0113607	-2.59702
TACC2	ES	13343	14	13	15.1	0	0.9843	0.6538	0.0914	0.0867813	0.0574523	6.22777	5.90795e-07	3.2496e-05	4.69029
TACC2	ES	13345	9	8	11	0	0.9878	0.7935	0.1319	0.0751312	0.590308	2.92235	0.00636542	0.0493034	-4.45818
PLEKHA1	ES	13354	15.1:15.2	14	16	0	0.9878	0.858	0.1016	-0.141994	0.147912	-7.75639	8.24827e-09	9.87509e-07	9.00932
PLEKHA1	ES	13355	15.1	14	16	0	0.986	0.8604	0.1733	-0.349988	0.397567	-13.1165	1.47168e-14	2.3099e-11	22.4561
BUB3	AA	13390	8.1	7	8.2	0	1	0.7331	0.1031	0.0970636	0.65078	5.39894	5.87638e-06	0.000211338	2.35453
LHPP	AT	13400	8	NA	NA	0	1	0.694	0.0705	-0.0569697	0.924885	-2.93469	0.00607126	0.0476549	-4.43442
LHPP	AT	13401	6	NA	NA	0	1	0.694	0.0705	0.0569697	0.0751152	2.93469	0.00607126	0.0476549	-4.43442
CTBP2	AP	13411	1	NA	NA	0	0.9983	0.7118	0.1346	0.146715	0.260918	6.31259	4.0505e-07	2.35776e-05	5.03744
CTBP2	AP	13412	3	NA	NA	0	0.9983	0.691	0.1254	-0.156715	0.314179	-6.52504	2.1879e-07	1.41195e-05	5.65781
UROS	AT	13430	7	NA	NA	0	1	0.3089	0.0343	0.021903	0.0245545	3.28917	0.00241394	0.0239909	-3.55876
BCCIP	AT	13431	7	NA	NA	0	1	0.5785	0.0863	0.0639576	0.659842	3.39475	0.00181996	0.0194608	-3.28805
BCCIP	AT	13432	9	NA	NA	0	1	0.6119	0.0635	-0.041897	0.173209	-3.54142	0.00122295	0.0144131	-2.90531
ADAM12	AT	13452	24	NA	NA	0	1	0.5434	0.0631	0.0674121	0.935588	5.17213	1.14424e-05	0.000363608	1.68961
ADAM12	AT	13453	19	NA	NA	0	1	0.5434	0.0631	-0.0674152	0.0644106	-5.17253	1.1429e-05	0.000363447	1.69077
STK32C	AP	13485	4	NA	NA	0	0.9913	0.6866	0.1219	0.0904781	0.0928569	4.44439	0.000101136	0.00207406	-0.445083
STK32C	AP	13486	1	NA	NA	0	0.9913	1	0.1502	-0.0790125	0.72898	-2.91812	0.00643354	0.0497083	-4.46821
FUOM	ES	13554	3	1	4	0	0.9738	0.1396	0.0224	0.0186531	0.982089	3.40276	0.00182696	0.0195166	-3.26936
RIC8A	AA	13590	2.2	1	2.3	0	0.9948	0.3894	0.0481	-0.0509906	0.104172	-6.0072	1.11246e-06	5.4995e-05	4.05353
ATHL1	AP	13636	1	NA	NA	0	0.986	0.6556	0.1016	-0.101445	0.174298	-2.91359	0.00640489	0.0495305	-4.48476
ATHL1	AP	13637	2.1	NA	NA	0	0.986	0.6556	0.1016	0.101445	0.825702	2.91359	0.00640489	0.0495305	-4.48476
SIGIRR	AP	13650	2	NA	NA	0	0.9948	0.9514	0.1956	-0.219484	0.533275	-5.26549	9.48409e-06	0.000309204	1.90588
SIGIRR	AP	13651	1.1	NA	NA	0	0.9948	0.9514	0.1956	0.219484	0.466725	5.26549	9.48409e-06	0.000309204	1.90588
PTDSS2	ES	13660	2.1:2.2	1	3	0	0.9721	1	0.1187	-0.10212	0.152852	-5.56688	4.9003e-06	0.00018189	2.63039
RNH1	AP	13662	2	NA	NA	0	1	0.5054	0.0816	0.0785424	0.243532	5.96678	1.11047e-06	5.49581e-05	4.02349
RNH1	AP	13664	1	NA	NA	0	1	0.5417	0.0857	-0.0831879	0.743755	-5.67969	2.57595e-06	0.000109169	3.17958
RNH1	ES	13673	3	2	4.2	0	0.9965	0.8676	0.1129	-0.0520424	0.904164	-3.9426	0.000401532	0.00612727	-1.82408
RNH1	ES	13677	3	1	4.2	0	1	0.5931	0.103	-0.0622273	0.229056	-4.30087	0.000144773	0.00274718	-0.824423
RNH1	AA	13679	4.2	1	4.3	0	1	0.7376	0.1128	0.0845697	0.522121	5.25131	9.06799e-06	0.000299189	1.92148
RASSF7	RI	13689	6.4	6.3	6.5	0	0.9913	0.93	0.1008	0.0818062	0.723582	3.30639	0.00236017	0.0235985	-3.51516
RASSF7	RI	13690	6.2:6.3:6.4	6.1	6.5	0	0.993	0.5888	0.0965	0.156334	0.767026	7.0794	5.31429e-08	4.46563e-06	7.12168
RASSF7	AA	13691	6.3:6.4	6.1	6.5	0	0.9721	1	0.1413	0.146513	0.520329	5.06584	1.99822e-05	0.000575542	1.22328
RASSF7	AD	13692	6.2:6.3	6.1	6.5	0	0.9843	0.7189	0.1091	0.119453	0.689744	4.90138	3.17049e-05	0.000827907	0.762915
RASSF7	RI	13694	6.2	6.1	6.3	0	0.993	0.4626	0.0835	0.0631156	0.792766	3.47799	0.00149335	0.0166832	-3.07522
IRF7	AP	13701	1	NA	NA	0	0.9843	0.5117	0.0534	0.0323312	0.911118	3.52569	0.00131315	0.015159	-2.95115
IRF7	AP	13703	2.1	NA	NA	0	0.9843	0.5117	0.0534	-0.0323312	0.0888815	-3.52569	0.00131315	0.015159	-2.95115
IRF7	ES	13715	4	3.2	5.1	0	0.9983	0.5404	0.0861	0.102318	0.833189	6.41585	3.00138e-07	1.83967e-05	5.33928
EPS8L2	RI	13731	4.2	4.1	4.3	0	0.9983	0.5246	0.0861	0.0404606	0.0557485	2.9994	0.00514707	0.0422574	-4.27869
EPS8L2	ES	13732	2.2	1	3	0	0.9651	0.4921	0.0525	-0.0425032	0.0424375	-2.98794	0.00549046	0.0443149	-4.29689
SLC25A22	AP	13758	2	NA	NA	0	0.9564	1	0.1696	-0.109639	0.670033	-3.03095	0.00492416	0.0408546	-4.19379
RPLP2	AD	13770	1.2:1.3	1.1	2	1	0.9703	0.7522	0.0997	-0.0926214	0.156648	-4.96847	3.12743e-05	0.000819585	0.841791
TSPAN4	AP	13794	4	NA	NA	0	0.9895	0.5877	0.0514	-0.0354438	0.100162	-4.91463	2.61714e-05	0.000716624	0.894391
TSPAN4	ES	13798	7	5.2	8	0	0.993	0.3139	0.0237	-0.00912424	0.983795	-2.93387	0.0060838	0.0477107	-4.43637
CHID1	AP	13801	2	NA	NA	0	0.9983	0.5426	0.0563	-0.0685063	0.0814554	-4.8639	3.02999e-05	0.000799772	0.748799
CHID1	AP	13804	3.1	NA	NA	0	0.9983	0.7773	0.1312	0.105169	0.692395	3.92513	0.000438424	0.00656263	-1.88561
CHID1	AP	13805	5.1	NA	NA	0	0.9983	0.348	0.0592	0.0302375	0.0590338	3.05889	0.00449829	0.0381201	-4.13005
CHID1	ES	13810	12	11	13	0	1	0.2834	0.0386	-0.0243879	0.943939	-3.53212	0.00125437	0.0146692	-2.92978
TSSC4	ES	13923	2	1	3.2	0	0.9895	0.9875	0.0982	0.123445	0.117977	3.55395	0.00118179	0.014079	-2.87226
SLC22A18	AP	13934	1	NA	NA	0	0.9878	0.9268	0.2075	0.142913	0.2139	3.36453	0.00207598	0.0214277	-3.36898
SLC22A18	AP	13935	2	NA	NA	0	0.9878	0.9299	0.2085	-0.254877	0.706739	-7.2511	3.98907e-08	3.52739e-06	7.44967
SLC22A18	AP	13936	3	NA	NA	0	0.9878	0.7053	0.1405	0.111974	0.0793609	4.99746	2.22921e-05	0.000626803	1.08333
SLC22A18	ES	13937	06:07:00	5	8	0	0.9913	0.381	0.0482	-0.0177594	0.982177	-3.14268	0.00362377	0.032568	-3.92467
NAP1L4	ES	13939	2	1	3	0	0.9983	0.8741	0.1053	0.0857182	0.10338	3.22927	0.0028293	0.0270132	-3.71045
OSBPL5	AP	13950	1.1	NA	NA	0	0.904	1	0.2556	-0.234371	0.678661	-3.86468	0.000539239	0.00777509	-2.06254
OSBPL5	AP	13951	3.1	NA	NA	0	0.904	0.9109	0.2508	0.202506	0.211997	3.09593	0.00417269	0.03612	-4.03657
PGAP2	AD	14004	11.2:11.3	11.1	12	0	0.986	0.8375	0.1398	0.123344	0.32278	5.12154	1.43874e-05	0.000438183	1.49008
PGAP2	AD	14005	11.2	11.1	12	0	0.9878	0.6517	0.0962	0.0633625	0.624094	3.4698	0.0015266	0.0169802	-3.09645
PGAP2	ME	14007	7|8	6	10	0	0.7749	1	0.237	-0.295358	0.746965	-6.5519	3.13254e-06	0.000126767	3.61445
PGAP2	ES	14010	7	6	10	0	0.925	1	0.1565	-0.245921	0.352711	-7.53867	2.83753e-08	2.67735e-06	7.87731
TRIM6	AP	14050	1	NA	NA	0	0.815	0.7513	0.1363	-0.169315	0.18357	-6.04095	7.17361e-06	0.000247461	2.69794
TRIM6	AP	14051	2	NA	NA	0	0.815	0.7513	0.1363	0.169315	0.81643	6.04095	7.17361e-06	0.000247461	2.69794
TRIM34	AP	14067	1	NA	NA	0	0.9913	0.9121	0.1643	0.111836	0.309967	3.28233	0.00245823	0.0243076	-3.57615
TRIM34	AP	14068	2	NA	NA	0	0.9913	0.9121	0.1643	-0.111836	0.690033	-3.28233	0.00245823	0.0243076	-3.57615
ARFIP2	AA	14141	2.1	1	2.2	0	0.993	0.6269	0.1027	0.102041	0.62704	3.82717	0.000575506	0.00815882	-2.15097
RRP8	ES	14161	2.2:3.1:3.3	1	4	0	0.9948	0.709	0.0461	0.0255688	0.972394	3.08137	0.00424575	0.0366442	-4.07524
ILK	ES	14173	3	1.4	4	0	1	0.1334	0.0213	0.0233788	0.958965	3.64292	0.000925809	0.0116924	-2.63624
ILK	RI	14175	1.2	1.1	1.3	0	0.9773	0.5368	0.0659	-0.0699125	0.134491	-4.48699	8.95412e-05	0.00189646	-0.324841
ILK	AA	14177	1.3	1.1	1.4	0	0.9983	0.7896	0.0824	0.0934879	0.356047	5.60191	3.23683e-06	0.000130268	2.95089
ZNF215	AT	14188	8	NA	NA	0	1	0.8274	0.1698	-0.147006	0.688567	-5.58223	3.42944e-06	0.000135903	2.89304
ZNF215	AT	14189	7.2	NA	NA	0	1	0.8274	0.1698	0.147006	0.311433	5.58223	3.42944e-06	0.000135903	2.89304
PPFIBP2	AP	14200	8	NA	NA	0	0.9564	0.9272	0.2397	-0.209903	0.409214	-3.79966	0.000670029	0.00915003	-2.24848
PPFIBP2	AP	14201	6	NA	NA	0	0.9564	0.9419	0.2163	0.141153	0.309165	3.1656	0.00356903	0.0321945	-3.86442
AKIP1	ES	14279	2	1.3	3	0	0.9983	0.5891	0.0827	0.0995333	0.660636	6.44563	2.75325e-07	1.70663e-05	5.42621
TMEM9B	ES	14289	3	2	4	0	1	0.2866	0.0377	-0.0317606	0.95972	-3.57822	0.00110587	0.0133794	-2.80813
SCUBE2	ES	14296	12:13:14:15	11	16	0	0.8133	0.7925	0.161	0.11365	0.762333	3.07649	0.0046866	0.0393067	-4.07488
TMEM41B	RI	14311	7.2	7.1	7.3	0	1	0.4584	0.0607	-0.0374727	0.937352	-3.56082	0.00115981	0.0138735	-2.85413
WEE1	AP	14327	2	NA	NA	0	0.9756	0.9128	0.1562	-0.156016	0.316623	-3.88204	0.00051412	0.00746626	-2.01597
WEE1	AP	14328	1	NA	NA	0	0.9756	0.9128	0.1562	0.156013	0.683378	3.88195	0.000514252	0.00746626	-2.01622
ADM	RI	14341	1.6:1.7	1.5	1.8	0	0.9302	0.4301	0.0781	0.0604097	0.0833016	4.50173	9.11235e-05	0.00191888	-0.314706
ADM	RI	14343	1.4	1.3	1.5	0	0.9302	0.5174	0.0806	0.06251	0.0780254	3.62811	0.00106278	0.0129881	-2.69745
ADM	RI	14344	1.2	1.1	1.3	0	0.9232	0.6206	0.0513	0.0321207	0.030171	4.33719	0.000162716	0.00299761	-0.83003
AMPD3	AP	14345	3	NA	NA	0	0.9093	0.7618	0.1357	0.109985	0.134968	3.20352	0.00350608	0.0317178	-3.77062
AMPD3	AP	14349	2	NA	NA	0	0.9093	0.4841	0.0761	-0.0532778	0.100137	-3.65987	0.00109751	0.0133154	-2.64599
LYVE1	ES	14359	00:02:03.200000	1.1	4	0	0.9267	0.0917	0.01	0.00300345	0.998595	3.00602	0.00545996	0.0441374	-4.24514
ZBED5	AA	14401	3.1	2	3.2	0	0.9878	0.9215	0.1305	-0.0589303	0.253862	-3.10518	0.00391677	0.0344613	-4.02002
PARVA	AT	14430	11.2	NA	NA	0	1	0.0702	0.0089	0.00445152	0.00535	3.02848	0.00477665	0.0398944	-4.20809
PARVA	AT	14431	15	NA	NA	0	1	0.0702	0.0089	-0.00445152	0.99465	-3.02848	0.00477665	0.0398944	-4.20809
BTBD10	ES	14453	2	1	4.1	0	0.9843	0.7448	0.1131	0.0761848	0.588771	3.03577	0.00468778	0.039309	-4.19032
LDHA	ES	14635	4	2.4	6.1	0	1	0.0102	0.0015	0.00256061	0.997317	4.32549	0.000134878	0.0026015	-0.754771
NAV2	AP	14694	4	NA	NA	0	0.8604	0.8061	0.1472	0.100569	0.110488	3.11614	0.00447813	0.0380152	-3.9774
NAV2	AP	14695	1	NA	NA	0	0.8604	0.8968	0.1261	-0.225608	0.144853	-5.8563	3.77254e-06	0.000146982	3.04516
HTATIP2	RI	14710	1.4	1.3	1.5	0	0.9948	0.8521	0.1197	0.0924187	0.384611	3.4001	0.00183999	0.0195891	-3.27619
HTATIP2	AD	14712	1.3	1.2	1.5	0	0.9825	0.8211	0.1192	-0.104022	0.658671	-4.11323	0.000258841	0.00435199	-1.36987
IMMP1L	ES	14814	05:06:00	4	7	0	0.9965	0.4591	0.0884	-0.0620727	0.881579	-3.25787	0.00262311	0.0255838	-3.6382
IMMP1L	ES	14819	4	1	7	0	0.8255	0.7791	0.1552	0.148014	0.2663	4.33878	0.000272737	0.0045112	-1.09172
EIF3M	AT	14845	8.2	NA	NA	0	1	0.4244	0.0494	0.0355121	0.0478045	3.05738	0.00443345	0.0377746	-4.13751
EIF3M	AT	14846	10	NA	NA	0	1	0.4244	0.0494	-0.0355121	0.952195	-3.05738	0.00443345	0.0377746	-4.13751
TCP11L1	AT	14874	11.2	NA	NA	0	1	0.3151	0.0444	-0.0299545	0.861062	-3.15555	0.00343448	0.0312437	-3.89514
TCP11L1	AT	14875	14	NA	NA	0	1	0.3151	0.0444	0.0299545	0.138938	3.15555	0.00343448	0.0312437	-3.89514
CSTF3	RI	14886	4.2	4.1	4.3	0	1	0.8995	0.1298	0.101121	0.172355	3.50918	0.00133529	0.0153659	-2.99008
CAPRIN1	AP	14940	2.1	NA	NA	0	0.9825	0.8757	0.147	0.102315	0.264373	4.05679	0.00029072	0.00474612	-1.50848
CAPRIN1	AP	14941	1	NA	NA	0	0.9825	0.9314	0.1678	-0.124118	0.71348	-3.83984	0.00053584	0.00774561	-2.10534
PDHX	AP	14971	2	NA	NA	0	0.9983	0.6164	0.0687	0.0658697	0.732589	5.4847	4.56735e-06	0.000172061	2.6064
PDHX	AP	14972	1	NA	NA	0	0.9983	0.6164	0.0687	-0.0658667	0.267409	-5.48448	4.57029e-06	0.000172061	2.60575
CD44	ES	15105	7:8:9.1:9.2	5	10	1	0.9389	0.9108	0.2025	-0.137806	0.532842	-4.54426	7.16838e-05	0.00159593	-0.131516
CD44	ES	15108	00:08:09.200000	5	10	1	0.9267	0.8475	0.193	-0.141388	0.441936	-3.8152	0.000574051	0.00814871	-2.17237
CD44	ES	15112	7:8:9.1:9.2:10:11	5	12.1	0	0.9703	0.9425	0.2152	-0.158721	0.409288	-4.31042	0.000140851	0.00269135	-0.797407
CD44	ES	15115	7:8:9.2:10:11	5	12.1	0	0.9686	0.9336	0.1979	-0.137764	0.330433	-3.95869	0.000383725	0.00592549	-1.7798
CD44	ES	15133	10:11:12.1:13:14	5	15	1	0.9599	0.8541	0.1779	0.119509	0.206145	3.51005	0.00133211	0.0153376	-2.98778
CD44	ES	15142	7:12.1:13:14	5	15	1	0.7661	0.6481	0.1096	0.0849192	0.072514	3.93357	0.000567246	0.0080782	-1.9682
CD44	ES	15143	12.1:13:14	5	15	0	1	0.956	0.2289	0.187952	0.297133	4.68572	4.75134e-05	0.00114292	0.275214
CD44	ES	15268	3.1:3.2:4:5:6:7:8:9.1:9.2:10:11:12.1:13:14:15:16.1:16.2:17.1	2.1	17.2	0	0.8394	1	0.2725	-0.144457	0.509129	-3.03658	0.00495281	0.0410768	-4.17641
PRR5L	ES	15426	10	9	11	0	0.9581	0.4781	0.0778	0.0762242	0.906206	5.06039	1.58836e-05	0.000476278	1.36299
TTC17	AT	15454	27	NA	NA	0	1	0.781	0.1178	-0.0545394	0.628885	-3.06904	0.0043018	0.0369249	-4.10895
TTC17	AT	15455	21	NA	NA	0	1	0.781	0.1178	0.0545394	0.371115	3.06904	0.0043018	0.0369249	-4.10895
EXT2	AP	15476	1	NA	NA	0	0.9808	0.5073	0.0813	-0.0555152	0.9142	-3.47275	0.0014742	0.0165289	-3.08543
EXT2	AP	15477	2	NA	NA	0	0.9808	0.5073	0.0813	0.0555152	0.0858	3.47275	0.0014742	0.0165289	-3.08543
PEX16	AD	15524	2.3	2.2	3	0	0.9808	0.3056	0.0333	0.0163906	0.0246062	3.12481	0.00379543	0.0336707	-3.96871
DGKZ	AP	15540	3	NA	NA	0	0.9703	0.9272	0.2009	0.372981	0.433502	11.7965	6.39435e-13	4.53256e-10	18.7029
DGKZ	AP	15541	2	NA	NA	0	0.9703	0.9547	0.1839	-0.315777	0.483269	-10.4896	1.16595e-11	5.02365e-09	15.7355
DGKZ	AP	15542	4	NA	NA	0	0.9703	0.5739	0.0731	-0.0507387	0.0746922	-3.30765	0.00241086	0.0239664	-3.51259
MDK	AP	15566	2.1	NA	NA	0	0.9948	0.4519	0.0805	0.166559	0.829572	13.1051	2.52427e-14	2.89589e-11	21.9559
MDK	AP	15567	1.1	NA	NA	0	0.9948	0.4519	0.0805	-0.166559	0.170425	-13.1048	2.52595e-14	2.89589e-11	21.9552
MDK	RI	15571	2.2:2.3	2.1	2.4	0	0.9895	0.1655	0.0201	0.0159812	0.0251	4.27835	0.000162278	0.00299278	-0.911149
MDK	AD	15573	1.2	1.1	2.4	0	0.9686	0.28	0.0385	0.0257355	0.0635766	3.2515	0.00279201	0.0267911	-3.65323
C11orf49	AT	15604	15	NA	NA	0	1	0.3035	0.0253	-0.0165152	0.0845909	-3.1971	0.00307964	0.0288088	-3.79131
C11orf49	ES	15635	3	1	7	0	0.9948	0.403	0.0546	-0.057503	0.905118	-5.31417	7.53885e-06	0.00025864	2.10575
NR1H3	AP	15692	1	NA	NA	0	0.9651	1	0.211	0.243306	0.351325	5.44134	6.28723e-06	0.000223915	2.34776
NR1H3	AP	15695	3.1	NA	NA	0	0.9651	0.8807	0.1763	-0.17501	0.405284	-4.66925	5.67052e-05	0.00131996	0.155138
NR1H3	ES	15703	4	3.5	5.2	0	0.9825	0.774	0.0966	0.0387937	0.0573923	3.68137	0.000859773	0.0110594	-2.54122
SLC39A13	RI	15747	6.2	6.1	6.3	0	1	0.8051	0.1164	0.0661909	0.135035	3.36825	0.00195427	0.0204931	-3.35639
CELF1	AA	15763	18.1:18.2	17	18.3	0	1	0.7014	0.1477	-0.150682	0.795753	-6.82422	9.24595e-08	7.05962e-06	6.52672
CELF1	AA	15766	12.1	11	12.2	0	0.9703	0.7519	0.1113	-0.100156	0.765828	-4.46716	9.47665e-05	0.00197197	-0.380861
PTPMT1	RI	15770	1.2	1.1	1.3	0	0.9965	0.362	0.0638	0.0433182	0.149474	4.32133	0.000136501	0.00262115	-0.766542
APLNR	RI	15826	1.2	1.1	1.3	0	1	0.2872	0.0273	0.0151303	0.984065	3.46682	0.00149809	0.0167144	-3.10091
TMX2	ES	15920	3.2:3.3	2	4	0	0.9983	0.8683	0.158	-0.167748	0.464377	-5.20371	1.04287e-05	0.000335767	1.78206
TMX2	ES	15921	3.3	2	4	0	1	0.3893	0.0512	-0.0437364	0.88392	-3.86741	0.00049603	0.00724236	-2.03016
TMX2	AA	15923	3.2	2	3.3	0	1	0.3276	0.0483	-0.0306848	0.111112	-3.95467	0.000388102	0.0059721	-1.79087
CTNND1	ES	15933	00:21:22.100000	20	22.2	0	0.9948	0.9175	0.1571	0.155324	0.701644	4.0124	0.000329694	0.00527158	-1.63153
CTNND1	ES	15935	21	20	22.1	0	1	0.899	0.2043	0.188464	0.183983	5.87687	1.4448e-06	6.84226e-05	3.75931
CTNND1	ES	15979	3:4.1:4.2:4.3:5	2.1	6	0	0.9703	1	0.1715	-0.146425	0.833342	-5.1631	1.27568e-05	0.000398179	1.61003
CTNND1	ES	15980	4.1:4.2:4.3:5	2.1	6	0	0.8726	1	0.2155	-0.15152	0.608003	-3.16199	0.00360215	0.0324267	-3.87324
CTNND1	ES	15982	3:4.2:4.3:5	2.1	6	0	0.7696	1	0.2525	-0.204617	0.525584	-3.10212	0.00492058	0.0408509	-4.00808
CTNND1	ES	15999	3:4.1:4.2:4.3	2.1	5	0	0.9825	0.8896	0.1709	-0.238197	0.407062	-9.23018	1.2894e-10	3.80313e-08	13.1953
CTNND1	ES	16000	4.1:4.2:4.3	2.1	5	0	0.9721	0.5374	0.0965	-0.0769758	0.155748	-3.57404	0.00111861	0.0134982	-2.81919
CTNND1	ES	16002	3:4.2:4.3	2.1	5	0	0.9721	0.6964	0.0882	-0.0854576	0.108326	-5.10852	1.37913e-05	0.000425036	1.5036
CTNND1	AD	16006	2.2:2.3	2.1	5	0	0.9791	0.6653	0.0917	-0.0803061	0.312844	-4.64943	5.28078e-05	0.0012464	0.170642
SLC15A3	ES	16132	5	4	6	0	0.9983	0.5559	0.0684	-0.0602303	0.803961	-3.82475	0.000558941	0.00798011	-2.14642
CYB561A3	AP	16158	1	NA	NA	0	0.9983	0.5109	0.0595	-0.0288875	0.950946	-3.01239	0.00506656	0.0417523	-4.24273
CYB561A3	AP	16160	4.1	NA	NA	0	0.9983	0.5109	0.0595	0.0288875	0.0490538	3.01239	0.00506656	0.0417523	-4.24273
CYB561A3	AA	16164	6.6	6.4	6.7	0	1	0.8914	0.1552	-0.153206	0.768067	-7.12628	3.90659e-08	3.47248e-06	7.39717
CPSF7	AD	16198	7.2	7.1	8	0	0.9913	0.6456	0.0922	0.0694125	0.434338	3.47798	0.0014934	0.0166832	-3.07525
CPSF7	ES	16217	4	3	6.1	0	0.9948	0.4068	0.0585	0.0330182	0.0532485	3.78999	0.000615884	0.00860084	-2.24078
SDHAF2	ES	16233	00:03:04.100000	1	6	0	1	0.9657	0.1418	0.116297	0.311755	3.95563	0.000387051	0.00596218	-1.78822
PPP1R32	AP	16238	1	NA	NA	0	0.9005	0.98	0.2575	-0.5196	0.439051	-9.66084	1.71417e-09	2.87535e-07	11.0769
PPP1R32	AP	16239	12	NA	NA	0	0.9005	0.8537	0.1908	0.198265	0.201425	3.58412	0.00160004	0.017584	-2.88375
PPP1R32	AP	16240	13.1	NA	NA	0	0.9005	0.9894	0.2092	0.32137	0.359511	5.83403	6.44377e-06	0.000228196	2.64066
FADS2	AT	16293	15.2	NA	NA	0	1	0.1391	0.0131	0.00655758	0.0158455	3.20925	0.00298273	0.0281462	-3.76083
FADS3	RI	16305	9.2	9.1	9.3	0	0.9983	1	0.1785	0.0898303	0.24697	2.94645	0.00589234	0.0467094	-4.40625
EML3	AA	16362	21.1	20	21.2	0	0.9948	0.2749	0.0255	-0.0153156	0.97354	-3.63137	0.000985652	0.0122852	-2.67369
BSCL2	ES	16407	10	9	11	0	1	0.0813	0.0114	-0.0082697	0.991892	-3.72587	0.000736101	0.00979038	-2.41397
TMEM179B	ES	16427	4	3	5	0	1	0.1729	0.0218	-0.0168182	0.984736	-3.44275	0.00159896	0.0175802	-3.16361
SLC3A2	AP	16462	1	NA	NA	0	1	0.6913	0.0971	0.115409	0.0818833	10.1887	1.15095e-11	5.0081e-09	15.6562
SLC3A2	AP	16464	5.1	NA	NA	0	1	0.7434	0.1117	-0.126752	0.888109	-10.0181	1.7537e-11	7.22449e-09	15.227
RTN3	ES	16526	3.1:3.2	2	4	0	0.7679	0.9252	0.2723	0.352995	0.689329	3.731	0.00145639	0.0163898	-2.62485
RTN3	ES	16533	2	1	4	0	0.993	0.1404	0.0122	-0.00788437	0.00717385	-4.28485	0.00015931	0.00294795	-0.892983
MARK2	AP	16536	1	NA	NA	0	0.9948	0.8204	0.1364	-0.206942	0.739174	-9.47055	6.95542e-11	2.32354e-08	13.8236
MARK2	AP	16537	2	NA	NA	0	0.9948	0.8204	0.1373	0.210588	0.241797	9.21299	1.34801e-10	3.92332e-08	13.15
STIP1	AP	16567	2	NA	NA	0	1	0.1672	0.0245	0.0136758	0.964635	3.03965	0.00464111	0.0390019	-4.18085
STIP1	AP	16568	1	NA	NA	0	1	0.1672	0.0245	-0.0136758	0.0353652	-3.03965	0.00464111	0.0390019	-4.18085
DNAJC4	RI	16596	7.2	7.1	7.3	0	1	0.7168	0.0972	0.0751212	0.439227	3.31512	0.00225275	0.0228224	-3.49262
VEGFB	AA	16601	6.1	5	6.2	0	1	0.3532	0.0563	0.0693515	0.811033	6.82397	9.25261e-08	7.05962e-06	6.52599
PPP1R14B	AP	16605	2	NA	NA	0	1	0.0898	0.0115	0.0119061	0.0119561	4.62375	5.69051e-05	0.00132321	0.0967114
PPP1R14B	AP	16606	1	NA	NA	0	1	0.1881	0.0215	-0.0188545	0.974842	-4.30346	0.000143698	0.00272917	-0.817091
PLCB3	AT	16608	31.2	NA	NA	0	1	0.2224	0.0409	0.0552606	0.885021	6.61274	1.69844e-07	1.15726e-05	5.91312
PLCB3	AT	16609	32	NA	NA	0	1	0.2224	0.0409	-0.0552606	0.114979	-6.61274	1.69844e-07	1.15726e-05	5.91312
GPR137	AP	16617	3.1	NA	NA	0	0.9965	0.8176	0.1047	-0.0690375	0.476337	-2.92931	0.00625479	0.0486437	-4.44167
GPR137	ES	16623	9	8	10.1	0	0.9948	0.2181	0.0361	-0.0293312	0.955002	-3.23668	0.00283573	0.0270541	-3.69081
GPR137	ES	16625	06:07:00	5	8	0	0.9965	0.3053	0.0457	-0.0223594	0.969209	-3.62832	0.000993867	0.0123665	-2.68173
TRMT112	RI	16633	2.3	2.2	2.4	0	1	0.0927	0.0126	-0.0135303	0.0374288	-5.09047	1.45418e-05	0.000441966	1.45085
TRMT112	AA	16634	2.1	1.3	2.2	0	1	0.0288	0.0042	-0.00280909	0.990286	-3.35587	0.0020202	0.0209742	-3.38821
PRDX5	ES	16636	3	2	4	0	1	0.0948	0.011	-0.00768485	0.971991	-5.4285	5.38756e-06	0.000196609	2.4413
PRDX5	ES	16639	02:03:00	1	4	0	1	0.1101	0.0131	-0.00670909	0.970658	-3.53688	0.00123819	0.0145498	-2.91726
PRDX5	ES	16640	3	1	4	1	0.993	0.568	0.0914	-0.0607344	0.590395	-5.18169	1.20884e-05	0.000380831	1.66372
RASGRP2	RI	16673	3.2	3.1	3.3	0	0.8901	0.9291	0.1831	0.131911	0.867233	3.02965	0.00526415	0.0429937	-4.18557
SF1	AA	16681	14.1:14.2	13	14.3	0	1	0.5897	0.0686	0.0400061	0.632464	2.98366	0.00535874	0.0435074	-4.31674
SF1	ES	16682	14.1	13	14.3	0	0.9895	0.6428	0.0821	0.0448406	0.162705	3.21907	0.00296966	0.028062	-3.73489
ATG2A	AD	16713	27.2	27.1	28	0	0.8412	0.8619	0.1328	-0.109338	0.515413	-3.41994	0.00361196	0.0325017	-3.37082
BATF2	AP	16723	3.1	NA	NA	0	0.911	0.7181	0.1041	-0.139207	0.143244	-4.89888	3.77841e-05	0.000959292	0.652887
BATF2	AP	16724	1	NA	NA	0	0.911	0.7181	0.1041	0.139207	0.856756	4.89888	3.77841e-05	0.000959292	0.652887
MRPL49	ES	16789	2	1	3.1	0	1	0.1437	0.009	0.00468485	0.995209	2.91753	0.00634126	0.0491596	-4.47537
DPF2	ES	16815	7	6	8	0	0.9965	0.2073	0.0349	-0.0333515	0.0761697	-4.24336	0.000170754	0.0031151	-0.986679
FRMD8	AT	16848	2.2	NA	NA	0	1	0.1347	0.0179	-0.0102758	0.0209833	-3.04751	0.00454795	0.0384816	-4.16166
FRMD8	AT	16849	11	NA	NA	0	1	0.1347	0.0179	0.0102758	0.979017	3.04751	0.00454795	0.0384816	-4.16166
FRMD8	ES	16850	4	3	5	0	0.986	0.3575	0.0625	-0.03495	0.961485	-3.3862	0.00190952	0.0201439	-3.31185
SCYL1	AP	16853	2.1	NA	NA	0	0.9895	0.3203	0.0438	0.024225	0.02768	3.80414	0.000613348	0.00857361	-2.21298
SCYL1	AP	16854	1	NA	NA	0	0.9895	0.3203	0.0438	-0.024225	0.97232	-3.80414	0.000613348	0.00857361	-2.21298
LTBP3	AP	16862	1.1	NA	NA	0	1	0.9299	0.2178	-0.127836	0.752112	-3.52646	0.00127388	0.0148461	-2.94467
LTBP3	AP	16864	17	NA	NA	0	1	0.7488	0.1434	0.0777273	0.131142	3.55802	0.00116872	0.0139576	-2.86152
LTBP3	ES	16865	25	24	26	0	0.9808	0.7612	0.1541	-0.194055	0.551745	-7.27867	3.70149e-08	3.30636e-06	7.52551
RELA	RI	16898	10.2	10.1	10.3	0	1	0.7526	0.0867	0.0435333	0.0550273	3.12822	0.00368868	0.0329962	-3.96303
KAT5	ES	16913	4	3	5	0	0.9948	0.7136	0.0966	-0.0780938	0.523429	-3.78354	0.000649257	0.00894749	-2.26836
RNASEH2C	RI	16916	1.2	1.1	1.3	0	0.9843	0.5345	0.0811	0.0810844	0.160303	5.56646	3.96823e-06	0.000152332	2.77727
CFL1	AP	16920	2	NA	NA	0	0.9965	0.2069	0.0336	0.0184156	0.0297246	2.97541	0.00556633	0.0447383	-4.33166
CFL1	AP	16922	5.1	NA	NA	0	0.9965	0.9233	0.1498	-0.0866375	0.5421	-3.41719	0.0017579	0.0189353	-3.2323
EFEMP2	RI	16931	11.2	11.1	11.3	0	1	0.5058	0.0767	-0.0460212	0.808341	-3.54609	0.00120745	0.0142934	-2.89299
BANF1	AD	16983	1.2	1.1	3	0	1	0.327	0.03	-0.0160273	0.913686	-3.05791	0.00442739	0.0377449	-4.13622
YIF1A	ES	17008	7	6	8.2	0	1	0.1995	0.0375	-0.0241879	0.976206	-4.01115	0.000330863	0.00528754	-1.63499
SLC29A2	AP	17023	1	NA	NA	0	0.7801	1	0.1601	-0.167847	0.287811	-4.04299	0.00111374	0.0134543	-2.12497
SLC29A2	AP	17024	2.1	NA	NA	0	0.7801	1	0.1601	0.167847	0.712189	4.04299	0.00111374	0.0134543	-2.12497
SLC29A2	AA	17025	10.1	9	10.2	0	0.9878	0.6815	0.0799	-0.0952903	0.891255	-7.58738	1.61108e-08	1.71028e-06	8.36923
PELI3	AT	17033	7.2	NA	NA	0	1	0.6547	0.0919	0.0619091	0.0883485	3.22642	0.00285067	0.0271701	-3.71763
PELI3	AT	17034	8	NA	NA	0	1	0.6547	0.0919	-0.0619091	0.911652	-3.22642	0.00285067	0.0271701	-3.71763
PELI3	ES	17035	3	2	4.1	0	0.8761	0.6452	0.1236	0.0612185	0.774515	3.05762	0.00503311	0.0415781	-4.11669
BBS1	RI	17047	15.2	15.1	15.3	0	0.9494	1	0.1163	0.0543897	0.0772419	3.71518	0.000874545	0.0112054	-2.48139
BBS1	ES	17048	8	7	9	0	0.9651	0.8465	0.128	0.0693806	0.0891905	3.49169	0.00148148	0.0165754	-3.04393
CCS	AA	17073	6.1	5	6.2	0	0.9965	0.4175	0.0432	0.01705	0.0388138	3.11773	0.00386558	0.0341271	-3.98612
RBM4	ES	17096	4.1	3.2	5	0	1	0.6209	0.0849	0.0676273	0.680956	4.20493	0.000190611	0.00339876	-1.09472
RBM4B	AT	17107	2.3	NA	NA	0	1	0.5519	0.0731	0.0748818	0.142086	4.84932	2.94735e-05	0.000782186	0.748581
RBM4B	AT	17108	5	NA	NA	0	1	0.5519	0.0731	-0.0748818	0.857914	-4.84932	2.94735e-05	0.000782186	0.748581
RCE1	AP	17130	2.1	NA	NA	0	0.9825	0.4988	0.096	0.0831656	0.11838	3.00445	0.00517021	0.0424143	-4.26189
RCE1	AP	17131	1	NA	NA	0	0.9825	0.4988	0.096	-0.0831656	0.88162	-3.00445	0.00517021	0.0424143	-4.26189
ANKRD13D	AP	17155	1	NA	NA	0	0.9913	0.9481	0.1759	-0.179053	0.504825	-4.37983	0.000121592	0.00239521	-0.626818
ANKRD13D	AP	17156	11.1	NA	NA	0	0.9913	0.9481	0.1759	0.179053	0.495175	4.37983	0.000121592	0.00239521	-0.626818
SSH3	RI	17164	4.2	4.1	4.3	0	0.9895	0.4742	0.0806	0.0368781	0.0629092	3.31615	0.00229999	0.0231689	-3.49041
TBC1D10C	AD	17191	7.2	7.1	8	0	0.8098	0.8401	0.1628	0.119035	0.193668	3.61972	0.00174989	0.0188675	-2.85251
RPS6KB2	ES	17203	6.1:6.2	5.1	7	0	0.9965	0.4356	0.0568	-0.0370313	0.0644723	-3.23969	0.00281342	0.0269201	-3.68326
TCIRG1	RI	17288	5.2	5.1	5.3	0	0.993	1	0.2132	0.158373	0.44228	3.20529	0.00301395	0.0283817	-3.77076
CHKA	ES	17289	3	2	4	0	0.9983	0.2752	0.0476	-0.0403594	0.948554	-3.26776	0.00261333	0.0255084	-3.61272
SUV420H1	AT	17293	12.3	NA	NA	0	1	0.7595	0.1383	0.0681212	0.536355	3.00927	0.0050184	0.0414955	-4.25477
SUV420H1	AT	17294	13	NA	NA	0	1	0.7595	0.1383	-0.0681212	0.463645	-3.00927	0.0050184	0.0414955	-4.25477
SUV420H1	RI	17296	12.2	12.1	12.3	0	1	0.3071	0.0581	-0.0388152	0.902274	-3.57907	0.0011033	0.013363	-2.80588
PPP6R3	ES	17327	2	1	3	0	0.9424	0.8143	0.13	0.101419	0.545063	3.3641	0.00202526	0.0210119	-3.36838
MRPL21	AD	17341	5.2	5.1	6.1	0	1	0.3326	0.0263	0.014603	0.0299924	4.87633	2.72349e-05	0.000737019	0.826992
MRPL21	AD	17344	2.2	2.1	3	0	0.9983	0.444	0.0519	-0.0546625	0.116558	-4.94687	2.38445e-05	0.0006624	0.986996
ANO1	ES	17387	17	16	18	0	0.911	0.9879	0.2559	-0.191242	0.776022	-4.70309	5.15118e-05	0.00122156	0.250431
PPFIA1	AT	17392	27.2	NA	NA	0	1	0.2553	0.0257	0.0205061	0.0336227	3.48609	0.0014218	0.0161294	-3.05058
PPFIA1	AT	17393	29	NA	NA	0	1	0.2553	0.0257	-0.0205061	0.966377	-3.48609	0.0014218	0.0161294	-3.05058
CTTN	ES	17404	11	10	13	0	1	0.4395	0.0701	0.0386788	0.809873	3.09023	0.00407192	0.0354414	-4.05688
IL18BP	AD	17503	1.2:1.3:1.4:1.5:1.6	1.1	1.8	0	0.9267	1	0.2374	0.167146	0.29527	3.64521	0.00109435	0.0132858	-2.67209
NUMA1	AP	17513	1	NA	NA	0	0.9424	0.8079	0.1479	-0.123954	0.654354	-3.1378	0.0040214	0.0350938	-3.9287
NUMA1	AP	17514	2	NA	NA	0	0.9424	0.8079	0.1479	0.123954	0.345646	3.1378	0.0040214	0.0350938	-3.9287
ANAPC15	AP	17559	2.1	NA	NA	0	0.9529	0.4957	0.0758	0.0860448	0.0803161	4.45092	0.000119127	0.00235405	-0.521487
ANAPC15	AP	17561	1.1	NA	NA	0	0.9529	0.4957	0.0758	-0.0860448	0.919684	-4.45092	0.000119127	0.00235405	-0.521487
ANAPC15	AA	17568	4.1	3.3	4.2	0	0.993	0.6054	0.0686	-0.0369031	0.651997	-2.9358	0.00615326	0.0481437	-4.42624
FOLR1	ES	17585	2.2	1	3.2	0	0.8743	0.6967	0.1169	0.0956846	0.728575	5.4895	9.732e-06	0.00031588	2.08832
ARAP1	ES	17641	32	31	33	0	0.9983	0.8254	0.1278	0.0807156	0.29158	3.6205	0.0010153	0.0125514	-2.70239
ATG16L2	AD	17651	6.4	6.3	7	0	0.9895	0.9459	0.1958	0.15067	0.511865	3.45945	0.0015283	0.0169868	-3.12013
ATG16L2	RI	17652	6.2	6.1	6.3	0	0.9319	1	0.1795	0.149215	0.300995	4.56222	0.000101625	0.00208312	-0.299337
FCHSD2	AT	17671	22	NA	NA	0	1	0.2291	0.0276	-0.0183485	0.949226	-3.12659	0.00370442	0.03311	-3.96708
FCHSD2	AT	17672	18.2	NA	NA	0	1	0.2291	0.0276	0.0183485	0.0507742	3.12659	0.00370442	0.03311	-3.96708
FAM168A	ES	17696	4	3	5	0	0.8412	0.8516	0.1043	-0.07945	0.141527	-3.2365	0.0035626	0.0321435	-3.69692
RAB6A	ME	17707	5|6	4	7	0	1	0.5256	0.0739	0.0369273	0.621294	3.97501	0.00036645	0.00572919	-1.73481
MRPL48	ES	17730	5	4	8	0	1	0.1971	0.0317	0.0222848	0.955245	3.80071	0.000597738	0.00841429	-2.2117
MRPL48	ES	17733	2	1	4	0	0.9948	0.5694	0.0492	-0.0282813	0.0658631	-3.34241	0.00214537	0.0219932	-3.42367
PAAF1	ES	17744	4.2	3.2	5	0	0.9093	0.7351	0.0958	-0.20295	0.137367	-6.16431	1.71713e-06	7.81206e-05	3.84204
DNAJB13	AP	17748	5.1	NA	NA	0	0.911	0.8627	0.1795	0.142588	0.277565	3.30597	0.00301075	0.0283704	-3.53408
DNAJB13	AP	17750	1	NA	NA	0	0.911	0.9387	0.2175	-0.153608	0.513804	-3.40676	0.0023548	0.0235684	-3.29557
P4HA3	AT	17766	16	NA	NA	0	1	0.8319	0.1609	-0.201639	0.242695	-5.25723	8.91174e-06	0.000295364	1.93882
P4HA3	AT	17767	14.2	NA	NA	0	1	0.8319	0.1609	0.201639	0.757305	5.25723	8.91174e-06	0.000295364	1.93882
KCNE3	AP	17772	2.1	NA	NA	0	0.9459	0.9529	0.1415	-0.115141	0.286811	-3.58256	0.00124247	0.0145767	-2.82291
KCNE3	AP	17773	1	NA	NA	0	0.9459	0.9529	0.1415	0.115141	0.713189	3.58256	0.00124247	0.0145767	-2.82291
XRRA1	RI	17785	18.2	18.1	18.3	0	0.986	0.8273	0.166	0.137938	0.565798	3.5373	0.00139956	0.0159554	-2.93839
XRRA1	AA	17786	18.1:18.2	17	18.3	0	0.9878	0.7588	0.164	0.220052	0.670995	5.55685	4.52449e-06	0.00017068	2.67742
XRRA1	ES	17787	18.1	17	18.3	0	0.9284	0.8151	0.135	0.113186	0.743515	2.98046	0.00581805	0.0462634	-4.30539
SLCO2B1	RI	17822	13.2	13.1	13.3	0	0.9808	0.666	0.0994	0.0532758	0.0871258	3.61442	0.00100132	0.0124302	-2.71211
ARRB1	ES	17833	13	12	15.2	0	0.9965	0.5976	0.1067	-0.0617094	0.369714	-2.9802	0.00549905	0.0443598	-4.32017
RPS3	AT	17835	7.2	NA	NA	0	1	0.4976	0.0607	0.0342364	0.889127	3.09938	0.00397632	0.0348527	-4.03434
RPS3	AT	17836	8	NA	NA	0	1	0.3065	0.0426	-0.0509152	0.0860909	-7.07109	4.56956e-08	3.95042e-06	7.2387
RPS3	AT	17838	6.3	NA	NA	0	1	0.1219	0.0166	0.0082303	0.0133758	3.96439	0.000377601	0.00584942	-1.76409
SERPINH1	AT	17869	6	NA	NA	0	1	0.0622	0.006	0.00236364	0.996579	3.17455	0.00326763	0.0301503	-3.84775
SERPINH1	AT	17870	5.2	NA	NA	0	1	0.0622	0.006	-0.00236364	0.00342121	-3.17455	0.00326763	0.0301503	-3.84775
SERPINH1	ES	17871	2.2	1	3	0	0.9895	0.3864	0.0416	-0.0891281	0.0792431	-6.48572	2.83008e-07	1.74686e-05	5.43201
UVRAG	AP	17878	10	NA	NA	0	1	0.9064	0.2026	0.306124	0.488541	7.14536	3.70076e-08	3.30636e-06	7.4519
UVRAG	AP	17880	1	NA	NA	0	1	0.8584	0.174	-0.222609	0.404856	-6.45324	2.69321e-07	1.6765e-05	5.44842
UVRAG	AP	17881	19.1	NA	NA	0	1	0.5587	0.0879	-0.0765848	0.102095	-3.49089	0.00140335	0.0159779	-3.03799
UVRAG	ES	17886	16	15	17	0	0.9424	0.339	0.0442	0.0282742	0.0285406	3.72668	0.000786334	0.01033	-2.43008
LRRC32	AP	17897	1	NA	NA	0	0.9511	1	0.1553	-0.284245	0.787065	-8.97847	2.48096e-10	6.41372e-08	12.5294
LRRC32	AP	17898	2	NA	NA	0	0.9511	1	0.1553	0.284245	0.212935	8.97847	2.48096e-10	6.41372e-08	12.5294
LRRC32	RI	17899	4.2	4.1	4.3	0	1	0.3842	0.0523	0.0358121	0.892185	3.65712	0.000890264	0.011367	-2.59833
TSKU	AP	17902	2	NA	NA	0	1	0.9438	0.2135	-0.182291	0.522739	-4.27933	0.00015401	0.00288509	-0.885246
TSKU	AP	17903	1	NA	NA	0	1	0.9438	0.2135	0.182291	0.477261	4.27933	0.00015401	0.00288509	-0.885246
PAK1	AP	17950	2	NA	NA	0	0.9965	0.9258	0.1939	-0.147397	0.593002	-4.58664	6.73037e-05	0.00151608	-0.0425834
PAK1	AP	17951	1	NA	NA	0	0.9965	0.9258	0.1939	0.147397	0.406998	4.58664	6.73037e-05	0.00151608	-0.0425834
AAMDC	ES	17978	05:06:00	4	7	0	0.9965	0.1631	0.0243	-0.0175212	0.981385	-3.45021	0.00156704	0.0173255	-3.14421
AAMDC	ES	17979	6	4	7	0	0.9913	0.1052	0.02	-0.0178062	0.983902	-3.81702	0.000591896	0.00835228	-2.17832
RAB30	AP	18039	2.1	NA	NA	0	0.8098	0.8643	0.1138	-0.137396	0.123564	-4.14561	0.000349182	0.00550622	-1.45521
CCDC90B	ES	18068	3	2	4.2	0	1	0.3392	0.044	-0.0256758	0.896856	-3.53451	0.00124623	0.014613	-2.9235
TMEM126B	ES	18122	3	1	4	0	1	0.6549	0.1044	-0.104461	0.729809	-6.43786	2.81594e-07	1.74058e-05	5.40352
TMEM126B	ES	18123	2.1:2.2	1	4	0	0.9965	0.6719	0.1087	0.0667394	0.136258	2.96963	0.00555443	0.0446917	-4.35058
TMEM126A	ES	18130	2.1:2.2	1	3.2	0	1	0.2585	0.0458	0.0842121	0.915194	9.42305	7.85297e-11	2.51914e-08	13.7
SYTL2	ES	18147	15	14	16	0	0.9825	0.6633	0.0902	-0.0471219	0.105295	-3.44009	0.00165333	0.0180658	-3.17328
SYTL2	ES	18148	13	12.2	14	0	0.9825	0.8587	0.1815	0.231422	0.637497	6.26231	5.35199e-07	3.01164e-05	4.78982
PICALM	ES	18169	20	18	21	0	0.9895	0.4867	0.0776	-0.0440242	0.930412	-3.68578	0.000822522	0.0106884	-2.52164
PICALM	ES	18170	19	18	20	0	1	0.4531	0.0614	0.0487939	0.860661	4.24972	0.000167668	0.003069	-0.968762
PICALM	ES	18172	14.1:14.2	13	15	0	1	0.6804	0.1397	0.0743515	0.338273	3.38966	0.00184504	0.0196287	-3.30119
PICALM	ES	18175	03:04:05	2	6	0	1	0.1067	0.0107	-0.0060697	0.993202	-3.46877	0.0014902	0.016656	-3.09582
EED	ES	18181	08:09:10	7	11.2	0	0.9738	0.8559	0.1529	-0.08429	0.850144	-3.11173	0.00409481	0.035565	-3.9955
PRSS23	AT	18201	2.3	NA	NA	0	1	0.2802	0.048	0.0465788	0.878353	4.64342	5.37391e-05	0.00126498	0.153343
PRSS23	AT	18202	6	NA	NA	0	1	0.2802	0.048	-0.0465788	0.121647	-4.64342	5.37391e-05	0.00126498	0.153343
FAT3	AT	18278	28	NA	NA	0	0.9965	0.9253	0.2417	-0.306373	0.597989	-7.34423	2.1099e-08	2.14148e-06	8.02033
FAT3	AT	18279	3	NA	NA	0	0.9965	0.9253	0.2417	0.306373	0.402011	7.34423	2.1099e-08	2.14148e-06	8.02033
SMCO4	AP	18299	1	NA	NA	0	0.9913	0.9154	0.2328	0.402975	0.458998	8.71111	6.54399e-10	1.3439e-07	11.584
SMCO4	AP	18300	2	NA	NA	0	0.9913	0.9154	0.2328	-0.402975	0.541002	-8.71111	6.54399e-10	1.3439e-07	11.584
TAF1D	AA	18320	8.1	7	8.2	0	1	0.7598	0.1175	0.122021	0.284956	5.55445	3.72097e-06	0.000145359	2.81139
CEP57	AT	18388	10.4	NA	NA	0	1	0.3258	0.0421	-0.0274515	0.123962	-3.74744	0.000693316	0.00937182	-2.35584
CEP57	AT	18390	13	NA	NA	0	1	0.3258	0.0421	0.0274515	0.876038	3.74744	0.000693316	0.00937182	-2.35584
CEP57	ES	18392	10.3	10.1	11	0	0.9878	0.4666	0.0629	0.0449094	0.933786	3.91648	0.000449121	0.00669084	-1.90915
JRKL	RI	18412	1.2	1.1	1.3	0	0.993	0.8288	0.1534	-0.102785	0.681474	-3.33514	0.00213548	0.0219213	-3.44141
CASP1	AA	18540	3.1:3.2:3.3	2	3.4	0	0.9023	0.9792	0.1539	-0.09867	0.301646	-3.0133	0.0052515	0.0429143	-4.23198
CASP1	AA	18542	3.1	2	3.2	0	0.9232	0.9115	0.1125	-0.103577	0.217029	-4.42373	0.000120553	0.00237794	-0.562977
COLCA2	AP	18663	2	NA	NA	0	0.9058	0.9168	0.1431	-0.113267	0.570638	-3.61418	0.00123504	0.0145166	-2.76108
COLCA2	AP	18664	1	NA	NA	0	0.9058	0.9168	0.1431	0.113267	0.429362	3.61418	0.00123504	0.0145166	-2.76108
C11orf88	RI	18667	6.2	6.1	6.3	0	0.9965	0.9913	0.3922	0.372173	0.30575	5.53726	3.91374e-06	0.000151452	2.76086
PPP2R1B	AT	18672	16	NA	NA	0	1	0.4267	0.0737	0.0643455	0.767058	4.27325	0.000156721	0.00291924	-0.902405
PPP2R1B	AT	18674	18	NA	NA	0	1	0.4267	0.0737	-0.0643455	0.232942	-4.27325	0.000156721	0.00291924	-0.902405
C11orf1	AP	18686	1	NA	NA	0	1	0.5783	0.0929	-0.074097	0.23357	-3.41834	0.00170792	0.0185241	-3.227
C11orf1	AP	18688	2	NA	NA	0	1	0.5551	0.0907	0.0673848	0.75088	3.25112	0.00267044	0.0258845	-3.65528
C11orf1	ES	18689	5	4	6	0	1	0.2189	0.0369	-0.0310939	0.953465	-3.73454	0.000718595	0.00960779	-2.39061
CRYAB	AP	18691	3	NA	NA	0	0.9983	0.6722	0.1105	0.0986606	0.289479	4.73353	4.1333e-05	0.00102743	0.413234
CRYAB	AP	18693	5.1	NA	NA	0	0.9983	0.6062	0.0956	-0.142818	0.142455	-7.98374	3.5677e-09	5.14076e-07	9.82127
DIXDC1	AP	18707	8	NA	NA	0	0.8743	0.9563	0.2232	-0.329952	0.546753	-8.37406	6.1601e-09	8.04393e-07	9.52846
DIXDC1	AP	18708	3	NA	NA	0	0.8743	1	0.2285	0.341689	0.40736	8.9105	1.79476e-09	2.99909e-07	10.7895
DIXDC1	AT	18709	7.2	NA	NA	0	1	0.5965	0.0959	0.0611091	0.0680727	5.33562	7.07837e-06	0.000245138	2.16867
DIXDC1	AT	18710	24	NA	NA	0	1	0.5965	0.0959	-0.0611091	0.931927	-5.33562	7.07837e-06	0.000245138	2.16867
C11orf57	AD	18728	1.2:1.3	1.1	2.1	0	1	0.8726	0.114	0.0752455	0.546508	3.09745	0.0039963	0.0349303	-4.0391
C11orf57	ES	18729	1.3	1.1	2.1	0	0.9372	0.645	0.0779	0.0690111	0.0706817	3.56477	0.00140266	0.0159758	-2.88496
TIMM8B	ES	18730	2	1	3	0	1	0.7121	0.0919	0.0993848	0.246498	4.74119	4.04189e-05	0.00101158	0.435394
SDHD	AT	18733	10	NA	NA	0	1	0.0464	0.0049	-0.00458182	0.00468182	-3.36117	0.00199173	0.020757	-3.3746
IL18	ES	18743	3	2.2	4	0	0.9703	0.2747	0.0347	0.0240871	0.966948	3.33899	0.00222042	0.022579	-3.43361
BCO2	AT	18749	13.2	NA	NA	0	0.9825	0.5528	0.103	-0.0664939	0.221262	-3.40007	0.00179411	0.0192452	-3.27431
BCO2	AT	18750	14	NA	NA	0	0.9825	0.5528	0.103	0.0664939	0.778738	3.40007	0.00179411	0.0192452	-3.27431
PTS	ES	18764	4	3	5	0	1	0.568	0.1094	0.219955	0.770898	9.69202	3.96509e-11	1.44015e-08	14.3958
NNMT	AP	18813	3.1	NA	NA	0	0.9965	0.341	0.0545	0.0688848	0.946236	5.78457	1.89364e-06	8.44892e-05	3.48796
NNMT	AP	18815	4	NA	NA	0	0.9965	0.2733	0.0418	-0.0284	0.0315515	-2.96685	0.00559389	0.0449198	-4.35726
NNMT	AP	18817	1	NA	NA	0	0.9965	0.2648	0.0364	-0.0404848	0.0222121	-4.31422	0.000139321	0.00266792	-0.786665
REXO2	ES	18838	4:5.2:5.3:6:7	2	8	0	1	0.0457	0.0061	-0.00245455	0.996779	-3.03963	0.00464139	0.0390019	-4.18091
TMPRSS13	AT	18946	7.2	NA	NA	0	0.9965	0.128	0.0218	0.0134212	0.0123076	4.40191	0.000108219	0.00219191	-0.53792
TMPRSS13	AT	18947	9.2	NA	NA	0	0.9965	0.8713	0.1678	0.148627	0.33972	4.53835	7.29219e-05	0.00161206	-0.148432
TMPRSS13	AT	18949	13	NA	NA	0	0.9965	0.9065	0.1729	-0.165639	0.587365	-4.86838	2.78755e-05	0.000746996	0.80391
AMICA1	ES	18976	2.2	1	4.1	0	0.9093	0.5336	0.0917	-0.0615966	0.849369	-3.48895	0.00158864	0.0175042	-3.06111
MPZL2	AT	18983	6	NA	NA	0	1	0.4668	0.0665	0.051397	0.874614	5.2561	8.94124e-06	0.000295694	1.93552
MPZL2	AT	18984	5.2	NA	NA	0	1	0.4668	0.0665	-0.051397	0.125386	-5.2561	8.94124e-06	0.000295694	1.93552
TMEM25	AP	19005	1	NA	NA	0	0.9459	1	0.1754	-0.156862	0.825202	-3.5459	0.0013683	0.0156751	-2.91649
TMEM25	AP	19006	2.1	NA	NA	0	0.9459	1	0.1754	0.156859	0.1748	3.54583	0.00136856	0.0156751	-2.91667
TMEM25	AA	19012	9.1	8.2	9.2	0	1	0.4197	0.0555	-0.0347091	0.952597	-3.69779	0.000795643	0.0104099	-2.48943
TMEM25	AA	19023	2.2	1	2.3	0	0.8272	0.8053	0.1091	-0.0653095	0.75662	-3.07159	0.00587256	0.0465946	-4.07606
PHLDB1	ES	19040	18.3	18.1	19	0	0.9686	0.3953	0.0777	0.0491656	0.120535	3.58328	0.00112347	0.0135495	-2.80038
MCAM	ES	19137	14	13.3	15.1	1	0.8517	0.1978	0.0252	0.0220333	0.93288	3.5721	0.00137646	0.0157533	-2.86662
C11orf63	AT	19191	10	NA	NA	0	1	0.8773	0.1422	-0.101985	0.696738	-3.56023	0.00116169	0.0138888	-2.85569
C11orf63	AT	19192	4	NA	NA	0	1	0.8773	0.1422	0.101988	0.303261	3.56022	0.00116172	0.0138888	-2.85572
VWA5A	RI	19215	1.2	1.1	1.3	0	0.8918	0.9836	0.2316	0.1133	0.252858	3.16583	0.00374837	0.0333942	-3.86144
TBRG1	ES	19224	5	3	6	0	0.9948	0.8435	0.1329	-0.0982531	0.336611	-3.52709	0.00130818	0.0151255	-2.9475
TBRG1	ES	19225	4	3	6	0	0.9948	0.6922	0.1217	-0.0838187	0.569712	-3.46637	0.00154073	0.0170904	-3.10533
VSIG2	AT	19231	7	NA	NA	0	0.9511	0.7285	0.0886	-0.0651844	0.798014	-4.09061	0.000275854	0.00455247	-1.43229
VSIG2	AT	19232	6.2	NA	NA	0	0.9511	0.7285	0.0886	0.0651844	0.201986	4.09061	0.000275854	0.00455247	-1.43229
FEZ1	AT	19294	3.2	NA	NA	0	1	0.8353	0.0882	0.0691818	0.102903	4.49226	8.33436e-05	0.00178978	-0.280331
FEZ1	AT	19295	11	NA	NA	0	1	0.8353	0.0882	-0.0691788	0.897095	-4.492	8.34052e-05	0.00178979	-0.281061
EI24	ES	19302	10	9	11.1	0	1	0.06	0.0094	0.0156667	0.980479	5.6193	3.07569e-06	0.000124696	3.00201
CHEK1	AP	19307	1	NA	NA	0	1	0.8786	0.1845	-0.171552	0.837591	-4.4778	8.69064e-05	0.00184957	-0.321642
CHEK1	AP	19309	2.1	NA	NA	0	1	0.8786	0.1845	0.171552	0.162409	4.4778	8.69064e-05	0.00184957	-0.321642
CHEK1	AT	19311	13.3	NA	NA	0	1	0.7421	0.1401	0.186209	0.442102	6.81394	9.52257e-08	7.20306e-06	6.49696
CHEK1	AT	19312	14	NA	NA	0	1	0.7421	0.1401	-0.186209	0.557898	-6.81394	9.52257e-08	7.20306e-06	6.49696
HYLS1	AP	19361	1	NA	NA	0	0.993	0.7912	0.1601	-0.125628	0.717545	-3.71455	0.000785017	0.0103262	-2.45293
HYLS1	AP	19362	2	NA	NA	0	0.993	0.7912	0.1537	0.107028	0.251803	3.29111	0.00245736	0.0243076	-3.55382
FOXRED1	ES	19378	2	1.1	3	0	0.9913	0.1224	0.0229	0.021	0.978046	3.39662	0.00185718	0.01971	-3.28513
ARHGAP32	RI	19451	21.4	21.3	21.5	0	0.9756	0.9937	0.2181	0.119094	0.297409	3.01043	0.0050919	0.0419297	-4.24745
APLP2	ES	19479	9	8	10	0	1	0.6357	0.1247	-0.197579	0.729611	-9.92645	2.20261e-11	8.49124e-09	14.9947
ZBTB44	AD	19501	5.2	5.1	7.1	0	1	0.5612	0.0823	-0.0746152	0.599365	-3.82376	0.000560492	0.00799497	-2.14911
SNX19	AT	19506	13	NA	NA	0	1	0.0772	0.0115	-0.00940303	0.98972	-3.79916	0.000600339	0.00844176	-2.21592
SNX19	AT	19507	8	NA	NA	0	1	0.0772	0.0115	0.00940303	0.0102803	3.79916	0.000600339	0.00844176	-2.21592
SNX19	AD	19515	1.2:1.3:1.4	1.1	2	0	1	0.3476	0.0586	0.0523667	0.916159	3.68477	0.00082482	0.0107025	-2.52435
NTM	AP	19519	3.1	NA	NA	0	0.9686	1	0.3404	0.38914	0.368405	6.33905	5.73761e-07	3.17178e-05	4.78998
NTM	AP	19520	1	NA	NA	0	0.9686	1	0.3395	-0.3922	0.615898	-6.34465	5.64995e-07	3.1312e-05	4.80552
THYN1	AD	19549	1.2	1.1	1.4	0	1	0.7523	0.1178	0.106291	0.523497	4.81135	3.29332e-05	0.000855407	0.638456
KDM5A	AT	19596	28	NA	NA	0	1	0.3926	0.0739	0.0511152	0.156412	3.02366	0.00483623	0.0402954	-4.21981
KDM5A	AT	19597	29	NA	NA	0	1	0.3926	0.0739	-0.0511152	0.843585	-3.02363	0.00483658	0.0402954	-4.21988
CCDC77	AP	19598	1	NA	NA	0	0.8325	0.8131	0.173	-0.134167	0.716781	-3.17467	0.00535193	0.0435004	-3.86145
CCDC77	AP	19599	2	NA	NA	0	0.8325	0.8131	0.173	0.134167	0.283219	3.17467	0.00535193	0.0435004	-3.86145
NINJ2	AP	19604	3	NA	NA	0	1	0.4233	0.0578	0.0432606	0.0682727	3.88227	0.000475773	0.0069954	-1.98953
NINJ2	AP	19605	2	NA	NA	0	1	0.6595	0.0957	-0.067603	0.90188	-4.79967	3.40764e-05	0.000881202	0.604611
NINJ2	RI	19608	4.2	4.1	4.3	0	0.993	0.4735	0.0497	0.0352	0.0439609	4.13247	0.000257	0.00433409	-1.33685
WNK1	ES	19616	14	13.2	15	0	0.9407	1	0.1939	0.182293	0.258987	5.28247	1.20148e-05	0.000379329	1.76494
WNK1	ES	19617	14:15:00	13.2	16	0	0.9878	1	0.1865	0.136369	0.131335	5.66601	2.97566e-06	0.000122671	3.06573
WNK1	ES	19618	15	13.2	16	0	0.9738	1	0.1437	0.127206	0.316576	5.04067	1.6829e-05	0.00049973	1.30546
CACNA2D4	AT	19675	39.2	NA	NA	0	1	0.7886	0.1405	0.106652	0.351414	3.70568	0.000778455	0.0102583	-2.46825
CACNA2D4	AT	19676	40	NA	NA	0	1	0.7886	0.1404	-0.113639	0.643338	-4.09054	0.000264149	0.00442241	-1.41465
TULP3	AP	19728	1	NA	NA	0	0.9668	0.6306	0.07	0.0417581	0.12433	3.32222	0.00232044	0.0233041	-3.47591
TULP3	AP	19729	2	NA	NA	0	0.9668	0.6306	0.07	-0.0417581	0.87567	-3.32222	0.00232044	0.0233041	-3.47591
TULP3	ES	19736	7	6	8	0	0.9668	0.1427	0.019	-0.018829	0.0143828	-3.51284	0.00140012	0.0159576	-2.98937
TSPAN9	ES	19753	4	3.2	5	0	0.9424	0.8231	0.1094	0.0407645	0.0580391	4.566	7.59804e-05	0.00166876	-0.134842
SCNN1A	ES	19841	12	11	13	0	0.9983	0.1063	0.0148	-0.00769394	0.987132	-3.12866	0.00368442	0.0329715	-3.96194
LTBR	ES	19852	00:08:09.100000	7	10	0	0.9965	0.8977	0.1846	-0.104819	0.617326	-3.17282	0.0033507	0.0306976	-3.85005
LTBR	ES	19853	9.1	7	10	0	1	0.1862	0.0231	-0.0208576	0.974395	-3.80437	0.000591673	0.00835228	-2.20178
GAPDH	AP	19872	1.1	NA	NA	0	1	0.4041	0.0396	0.0583152	0.910924	7.47195	1.47402e-08	1.60347e-06	8.3834
GAPDH	AP	19874	2.1	NA	NA	0	1	0.1666	0.0305	-0.066	0.0769	-11.4727	5.44659e-13	3.98944e-10	18.7681
NOP2	ES	19889	16	15	17	0	1	0.4181	0.0371	-0.0434455	0.0702258	-3.50381	0.00135494	0.0155474	-3.00416
NOP2	ES	19890	5	4.5	6	0	1	0.828	0.1226	-0.102424	0.475785	-3.73902	0.00070972	0.0095239	-2.37855
NOP2	RI	19891	4.3:4.4	4.2	4.5	0	0.9127	1	0.2121	-0.187104	0.418556	-3.01919	0.00618057	0.0482705	-4.1949
ZNF384	AP	19921	2.1	NA	NA	0	0.9983	0.7587	0.1341	-0.0799545	0.737844	-2.95058	0.00583075	0.046329	-4.39635
ZNF384	AP	19922	1.1	NA	NA	0	0.9983	0.7587	0.1341	0.0799545	0.262156	2.95058	0.00583075	0.046329	-4.39635
ZNF384	ES	19923	8	7	9	0	0.9983	0.8184	0.1033	-0.0832273	0.506338	-3.35826	0.00200732	0.0208651	-3.38208
ZNF384	AD	19927	1.2	1.1	2.2	0	0.9476	0.7848	0.1576	-0.169043	0.44839	-4.44529	0.000129347	0.00252198	-0.571896
COPS7A	AD	19958	1.2:1.3	1.1	2.4	0	0.9738	0.8374	0.1234	0.100516	0.5506	3.71727	0.00077918	0.0102648	-2.44568
COPS7A	AD	19959	1.2	1.1	2.4	0	0.986	0.534	0.0651	0.0425687	0.802295	3.16159	0.00345012	0.0313152	-3.87791
PTMS	AA	19966	3.1	2	3.2	0	0.9948	0.1509	0.0199	0.0118688	0.0377969	3.69128	0.000836757	0.0108264	-2.51489
CD4	AA	19971	6.1	5	6.2	0	0.9756	0.8019	0.0514	0.014775	0.0152923	2.98559	0.00542427	0.0439178	-4.30724
GPR162	AD	19973	2.2	2.1	3	0	0.9791	0.7335	0.158	0.129697	0.799734	4.71187	4.69618e-05	0.00113213	0.313875
CDCA3	AT	19983	5	NA	NA	0	1	0.845	0.1186	0.0887394	0.829685	3.13435	0.00363013	0.0325981	-3.94783
CDCA3	AT	19984	6	NA	NA	0	1	0.845	0.1186	-0.0887394	0.170315	-3.13435	0.00363013	0.0325981	-3.94783
USP5	AD	19988	15.2	15.1	16	0	0.9983	0.3673	0.0498	-0.0394594	0.135962	-3.84042	0.000554767	0.00794425	-2.11521
LRRC23	AD	20009	3.2:3.3	3.1	4	0	0.9005	0.7918	0.1547	-0.208756	0.188047	-5.84993	3.31511e-06	0.000132568	3.13443
LRRC23	AD	20010	3.2	3.1	4	0	0.918	0.9475	0.2329	-0.287193	0.360819	-6.21672	8.03745e-07	4.24046e-05	4.44977
ENO2	AP	20011	2.1	NA	NA	0	0.9983	0.9851	0.1949	0.153485	0.339724	3.62544	0.000971451	0.0121426	-2.68282
ENO2	AP	20012	1	NA	NA	0	0.9983	0.9851	0.1949	-0.153485	0.660276	-3.62544	0.000971451	0.0121426	-2.68282
PTPN6	AP	20022	1	NA	NA	0	0.9965	0.9569	0.1991	0.247847	0.299891	6.41224	3.48844e-07	2.09154e-05	5.22111
PTPN6	AP	20023	2	NA	NA	0	0.9965	0.9569	0.1991	-0.247847	0.700109	-6.41224	3.48844e-07	2.09154e-05	5.22111
PHB2	RI	20046	5.2	5.1	5.3	0	0.9983	0.4048	0.0305	0.00823437	0.0161262	3.124	0.00380338	0.0337202	-3.9707
LPCAT3	RI	20060	10.2	10.1	10.3	0	1	0.7145	0.0747	0.0441727	0.0992985	3.05165	0.00449965	0.0381243	-4.15155
C1S	AA	20070	6.1	5	6.2	0	1	0.4574	0.0459	-0.0694455	0.816995	-11.4983	5.13621e-13	3.82587e-10	18.828
C1RL	AA	20074	5.1	4.2	5.2	0	0.9965	0.6617	0.0817	0.0405406	0.108328	4.90555	2.68674e-05	0.000729321	0.868295
RBP5	AT	20077	5	NA	NA	0	1	0.509	0.0887	-0.0433848	0.891238	-3.1669	0.00333389	0.0306294	-3.86686
RBP5	AT	20078	3	NA	NA	0	1	0.509	0.0887	0.0433879	0.108761	3.16722	0.00333107	0.0306263	-3.86605
PEX5	AA	20088	11.1	10	11.2	0	0.9965	0.2414	0.0405	-0.0424594	0.939735	-5.09542	1.55174e-05	0.000466455	1.41473
CLEC1A	ES	20304	2	1	3	0	0.8412	1	0.2584	0.19024	0.383393	3.81137	0.000819004	0.010649	-2.29629
OLR1	AP	20333	3	NA	NA	0	0.8604	0.5403	0.0733	0.0450857	0.038482	3.08317	0.0046093	0.0388585	-4.05901
OLR1	AP	20334	1	NA	NA	0	0.8604	0.5403	0.0733	-0.0450857	0.961518	-3.08317	0.0046093	0.0388585	-4.05901
GABARAPL1	AT	20351	4.2	NA	NA	0	1	0.2412	0.0247	0.0121273	0.0203091	3.65611	0.000892751	0.0113855	-2.60103
GABARAPL1	AT	20353	5	NA	NA	0	1	0.2412	0.0247	-0.0121273	0.979691	-3.65611	0.000892751	0.0113855	-2.60103
GABARAPL1	AD	20354	2.13:2.14	2.12	3	0	0.9093	0.9275	0.231	0.198189	0.667512	3.82632	0.000712007	0.00954183	-2.22289
GABARAPL1	RI	20356	2.13	2.12	2.14	0	0.8499	0.7951	0.1994	0.157504	0.729125	4.45563	0.000171168	0.00312136	-0.709078
GABARAPL1	AD	20405	2.7:2.8:2.9:2.10:2.11:2.12	2.6	3	0	0.9948	0.1484	0.0151	-0.00730313	0.0102692	-3.37963	0.00194325	0.0204159	-3.32867
APOLD1	AT	20516	4	NA	NA	0	1	0.7742	0.1302	-0.184473	0.247482	-5.88263	1.42064e-06	6.74964e-05	3.77623
APOLD1	AT	20517	17	NA	NA	0	1	0.7742	0.1302	0.184479	0.752521	5.88283	1.41983e-06	6.74964e-05	3.77681
EMP1	AA	20536	4.3	4.1	4.4	0	0.9913	0.0223	0.0031	0.00230909	0.997067	3.13404	0.00363306	0.0325981	-3.94859
EPS8	AP	20581	11	NA	NA	0	0.9965	0.6629	0.0866	0.0565273	0.0540576	2.97691	0.00545202	0.04411	-4.33303
DERA	ES	20598	4.1:4.2	3	5	0	1	0.3207	0.0414	-0.0223091	0.971379	-3.25157	0.00266722	0.0258743	-3.65413
LMO3	AP	20608	2	NA	NA	0	0.9564	0.4987	0.0468	0.0277625	0.0342277	3.77976	0.000656054	0.00901008	-2.27849
LMO3	AP	20609	4.1	NA	NA	0	0.9564	0.6729	0.0671	-0.0257	0.116948	-3.26698	0.00261873	0.0255524	-3.6147
LMO3	AP	20610	7.1	NA	NA	0	0.9564	0.1807	0.0247	0.0151469	0.01176	3.25253	0.00272012	0.0262618	-3.65103
LMO3	AP	20612	6.1	NA	NA	0	0.9564	0.8515	0.1244	-0.123125	0.466966	-5.35218	7.37838e-06	0.00025353	2.15669
LMO3	AP	20614	8	NA	NA	0	0.9564	0.5678	0.0728	0.0666656	0.106842	4.18075	0.000213948	0.00372086	-1.18292
LMO3	ES	20632	6.3	3	9.1	0	0.7539	0.7956	0.1289	0.0917643	0.726069	3.36117	0.00228365	0.0230823	-3.38517
PLEKHA5	ES	20649	27	26	28	0	0.9721	0.6793	0.1001	0.0445818	0.0996242	3.00918	0.00501957	0.0414974	-4.25499
SLCO1A2	AP	20676	3.1	NA	NA	0	0.9895	0.3581	0.0445	-0.0772	0.0431169	-3.8227	0.00058266	0.00824428	-2.163
SLCO1A2	AP	20677	1	NA	NA	0	0.9895	0.3581	0.0445	0.0772	0.956883	3.8227	0.00058266	0.00824428	-2.163
ABCC9	AT	20715	43	NA	NA	0	1	0.2335	0.0278	0.0141939	0.963455	3.30638	0.00230587	0.0232161	-3.51493
ABCC9	AT	20716	7.2	NA	NA	0	1	0.2335	0.0269	-0.0146879	0.033653	-3.31945	0.00222684	0.0226226	-3.48155
ST8SIA1	AT	20726	7	NA	NA	0	1	0.7509	0.1532	-0.134445	0.813432	-6.6615	1.47572e-07	1.03437e-05	6.05488
ST8SIA1	AT	20727	3	NA	NA	0	1	0.7509	0.1532	0.134445	0.186568	6.6615	1.47572e-07	1.03437e-05	6.05488
BCAT1	AP	20753	2	NA	NA	0	0.8988	0.7216	0.1653	-0.117385	0.234729	-3.08085	0.0047534	0.0397531	-4.0621
LYRM5	AT	20809	4	NA	NA	0	1	0.5107	0.0758	0.0766394	0.227792	6.98201	5.88879e-08	4.82837e-06	6.98237
LYRM5	AT	20810	3.4	NA	NA	0	1	0.5107	0.0758	-0.0766424	0.772206	-6.98208	5.88772e-08	4.82837e-06	6.98256
IFLTD1	AT	20828	13	NA	NA	0	0.9511	0.2937	0.0388	0.0316448	0.981508	3.31784	0.0024773	0.0244602	-3.48979
RASSF8	AT	20838	9	NA	NA	0	1	0.7075	0.0974	0.0526333	0.0688864	5.78487	1.89196e-06	8.44892e-05	3.48885
RASSF8	AT	20839	8	NA	NA	0	1	0.7075	0.0974	-0.0526364	0.931115	-5.78487	1.89197e-06	8.44892e-05	3.48885
FGFR1OP2	ES	20856	5.1	4	6	0	0.9913	0.8684	0.163	-0.2221	0.525589	-8.28857	1.55546e-09	2.69131e-07	10.6638
PPFIBP1	AT	20887	4.2	NA	NA	0	1	0.3647	0.0434	0.0347364	0.0268227	5.18546	1.1003e-05	0.000351169	1.72863
PPFIBP1	AT	20888	31	NA	NA	0	1	0.3647	0.05	-0.0387303	0.961923	-3.43387	0.00163781	0.0179229	-3.1867
PPFIBP1	ES	20890	20	19	21	0	0.904	0.8582	0.1732	0.239703	0.488789	7.2052	6.72081e-08	5.36055e-06	7.0011
PPFIBP1	ES	20893	11	10	12	0	0.8028	0.6541	0.1313	-0.172365	0.289462	-6.12467	1.89924e-06	8.46528e-05	3.73989
DDX11	RI	20963	29.2	29.1	29.3	0	0.986	0.6539	0.1052	0.0985276	0.175037	4.07661	0.000331052	0.00528754	-1.53032
FAM60A	AP	20982	1	NA	NA	0	0.9965	0.7539	0.1576	0.268782	0.466009	8.95159	2.66186e-10	6.76349e-08	12.4578
FAM60A	AP	20983	2	NA	NA	0	0.9965	0.7539	0.1576	-0.268785	0.533992	-8.95151	2.66243e-10	6.76349e-08	12.4576
BICD1	AT	21019	10	NA	NA	0	1	0.9801	0.2088	-0.174506	0.676329	-4.50766	7.97082e-05	0.00173245	-0.236306
BICD1	AT	21020	1.5	NA	NA	0	1	0.9801	0.2088	0.174506	0.323671	4.50766	7.97082e-05	0.00173245	-0.236306
FGD4	AP	21030	1	NA	NA	0	0.8307	1	0.2572	0.223572	0.345726	3.36262	0.0025226	0.0248516	-3.39453
DNM1L	ES	21048	17	16	18	0	0.986	1	0.1308	-0.0766437	0.438088	-3.12318	0.00381146	0.0337646	-3.97271
PPHLN1	AT	21213	18	NA	NA	0	1	0.2731	0.0492	0.0273515	0.159642	3.21859	0.00291017	0.0276054	-3.73734
PPHLN1	AT	21214	19	NA	NA	0	1	0.3368	0.0681	-0.0888727	0.161427	-6.78695	1.02891e-07	7.65117e-06	6.41881
PPHLN1	ES	21228	4	2	5	0	0.9948	0.8644	0.086	-0.0501406	0.286051	-2.94996	0.00593695	0.0469529	-4.3925
TWF1	ES	21276	3	2	4	0	0.9913	0.2528	0.0422	-0.0529516	0.0938219	-6.58355	2.50133e-07	1.56817e-05	5.59191
ANO6	AT	21297	24	NA	NA	0	1	0.247	0.0342	-0.0184394	0.96072	-3.45304	0.00155508	0.0172278	-3.13684
ANO6	AT	21298	25	NA	NA	0	1	0.2358	0.0306	0.0139848	0.0359742	3.43334	0.00164014	0.0179439	-3.18807
RAPGEF3	AP	21347	1	NA	NA	0	0.8953	0.7265	0.1096	-0.194762	0.12766	-4.88925	3.55967e-05	0.000911169	0.679204
RAPGEF3	AP	21349	2.1	NA	NA	0	0.8953	1	0.1439	0.213538	0.817492	4.27206	0.000194439	0.00344705	-1.00599
RAPGEF3	AT	21351	18.2	NA	NA	0	1	0.754	0.0989	0.110088	0.591638	5.95799	1.1394e-06	5.61371e-05	3.99766
RAPGEF3	AT	21352	30	NA	NA	0	1	0.754	0.0989	-0.110088	0.408362	-5.95799	1.1394e-06	5.61371e-05	3.99766
TMEM106C	AD	21391	5.2	5.1	6	0	1	0.6602	0.0945	0.134176	0.55513	8.48033	9.28155e-10	1.76583e-07	11.1882
PFKM	AP	21416	1	NA	NA	0	0.9808	0.7087	0.0826	0.0436355	0.0913344	3.04234	0.00478382	0.0399466	-4.16638
PFKM	AD	21421	16.2:16.3	16.1	17	0	0.9791	1	0.2478	0.227967	0.385968	4.61897	6.9934e-05	0.0015623	-0.0235944
PFKM	RI	21423	16.2	16.1	16.3	0	0.9913	0.8593	0.124	0.0597067	0.10064	3.93165	0.000468177	0.00691147	-1.89818
CCNT1	ES	21462	7	6	8	0	0.9075	0.5769	0.1164	0.15191	0.825437	5.19584	1.52609e-05	0.000460004	1.52544
CACNB3	AP	21468	1	NA	NA	0	0.9791	0.6906	0.1142	-0.191631	0.183698	-7.17776	4.04146e-08	3.56654e-06	7.39876
CACNB3	AP	21469	2	NA	NA	0	0.9791	0.9195	0.1557	0.153172	0.496902	4.52382	8.05837e-05	0.00174716	-0.220684
DDX23	ES	21484	07:08:00	6	9.1	0	1	0.0268	0.0033	0.00354848	0.997162	2.90945	0.00647232	0.0498852	-4.49461
CCDC65	AT	21489	8.2	NA	NA	0	0.9965	0.9328	0.2218	-0.213548	0.438977	-4.68366	4.77994e-05	0.00114729	0.269272
CCDC65	AT	21490	9	NA	NA	0	0.9965	0.9328	0.2218	0.213555	0.561023	4.68377	4.77831e-05	0.00114729	0.269609
FKBP11	AT	21495	8	NA	NA	0	1	0.6037	0.0937	0.0901667	0.708459	4.10773	0.000251544	0.00426499	-1.36675
FKBP11	AT	21496	7.2	NA	NA	0	1	0.5568	0.0897	-0.0866152	0.285289	-4.07143	0.000278891	0.00458538	-1.46782
PRKAG1	ES	21509	3	2	4.2	0	1	0.2	0.0159	0.0151273	0.981364	4.36715	0.000119631	0.00236295	-0.636688
PRKAG1	AD	21510	1.2	1.1	2	0	0.9983	0.7544	0.119	0.0883424	0.0540803	3.60416	0.00102994	0.0126928	-2.73937
TUBA1C	AP	21541	1	NA	NA	0	1	0.0641	0.0049	-0.00429697	0.00262727	-5.02266	1.77419e-05	0.000522602	1.2529
TUBA1C	AP	21542	4	NA	NA	0	1	0.0641	0.0049	0.00429697	0.997373	5.02266	1.77419e-05	0.000522602	1.2529
TROAP	AT	21551	10.2	NA	NA	0	0.9983	0.9001	0.1847	-0.270297	0.495523	-6.43706	3.25033e-07	1.97574e-05	5.29239
TROAP	AT	21552	2.8	NA	NA	0	0.9983	0.9189	0.1706	0.173206	0.286849	4.71534	4.6495e-05	0.0011252	0.323781
TROAP	AT	21553	13	NA	NA	0	0.9983	0.572	0.1157	0.0971031	0.217625	3.31333	0.00231726	0.0232911	-3.49758
SPATS2	AT	21577	6	NA	NA	0	1	0.4172	0.0582	-0.0568727	0.187773	-4.27059	0.000157926	0.00292973	-0.909931
SPATS2	AT	21578	19	NA	NA	0	1	0.4172	0.0582	0.0568727	0.812227	4.27059	0.000157926	0.00292973	-0.909931
MCRS1	ES	21591	2	1	3	0	0.9913	0.8217	0.0628	0.0446094	0.0818062	5.01164	1.97727e-05	0.000571691	1.17334
SMARCD1	ES	21644	5	4	7.1	1	0.9424	0.3985	0.0657	-0.0441138	0.854148	-3.12281	0.00407403	0.0354414	-3.96645
LIMA1	AP	21688	4.1	NA	NA	0	1	0.9376	0.1735	0.1154	0.313097	3.21147	0.00296529	0.0280376	-3.75524
LARP4	AA	21704	4.1	3.2	4.2	0	0.7871	0.3855	0.0749	0.0407864	0.0899925	3.05735	0.00584781	0.0464317	-4.10797
ATF1	ES	21714	5	4	6	0	0.9634	0.6421	0.0586	0.0309214	0.0339016	3.87523	0.000596889	0.00840503	-2.07992
SLC11A2	AT	21729	23.3	NA	NA	0	1	0.6913	0.1042	-0.0607273	0.275315	-3.5261	0.00127515	0.0148482	-2.94564
SLC11A2	AT	21730	22.2	NA	NA	0	1	0.6913	0.1042	0.0607273	0.724685	3.5261	0.00127515	0.0148482	-2.94564
LETMD1	ES	21747	3.2:3.3	2	4	0	0.918	1	0.2125	0.151516	0.429511	2.97454	0.00648164	0.0499483	-4.30206
LETMD1	ES	21757	3.2:3.3:4:5:6	2	7	0	0.9895	1	0.1766	0.104367	0.218205	3.77806	0.000636704	0.00883266	-2.27309
DAZAP2	AT	21810	7	NA	NA	0	1	0.1188	0.0133	0.00981515	0.0103955	4.68315	4.78707e-05	0.00114829	0.267797
DAZAP2	AT	21811	5	NA	NA	0	1	0.1195	0.0156	-0.0127394	0.974321	-4.70484	4.49387e-05	0.00109114	0.330382
SLC4A8	AT	21857	18.2	NA	NA	0	1	0.4407	0.0785	0.0343121	0.05865	3.13907	0.00358564	0.0323244	-3.93611
ACVRL1	AP	21870	1	NA	NA	0	0.9127	0.986	0.1722	0.0954481	0.447338	3.17358	0.00377778	0.0335745	-3.84224
ACVRL1	AP	21871	2.1	NA	NA	0	0.9127	0.986	0.1722	-0.0954481	0.552662	-3.17358	0.00377778	0.0335745	-3.84224
NR4A1	AP	21884	4.1	NA	NA	0	1	0.9866	0.1881	-0.154864	0.830235	-4.35546	0.000123729	0.0024286	-0.669847
NR4A1	AP	21887	2	NA	NA	0	1	0.9866	0.1851	0.150115	0.166667	4.4418	9.64418e-05	0.00200115	-0.42434
NR4A1	ES	21892	4.2:5.2	4.1	6.1	0	0.9546	1	0.1266	0.0992594	0.178009	3.23142	0.00287508	0.0273612	-3.70398
TENC1	AP	21925	3	NA	NA	0	0.9913	0.938	0.1678	-0.101903	0.599267	-3.92403	0.000423092	0.00638158	-1.87511
CSAD	ES	21952	14	13	15	0	0.9372	0.7635	0.1351	-0.0896893	0.835689	-3.13185	0.00408184	0.0354874	-3.94297
PRR13	AA	22033	4.1	3	4.2	0	1	0.281	0.0405	-0.0199758	0.975982	-4.43896	9.72375e-05	0.0020129	-0.432442
PRR13	AA	22038	4.1:4.2	3	4.3	0	1	0.3302	0.0356	-0.0166273	0.968844	-3.39728	0.00180763	0.0193571	-3.28152
PCBP2	AA	22048	16.1	15	16.2	0	1	0.2413	0.0343	-0.023997	0.780065	-3.06672	0.00432767	0.0370974	-4.11463
PCBP2	ES	22052	15	14.1	16.1	0	1	0.4576	0.0823	0.0452485	0.746445	3.42336	0.00168495	0.0183293	-3.21399
PCBP2	ES	22053	13	12	14.1	1	1	0.1262	0.0151	-0.0109667	0.946838	-3.31458	0.00225598	0.0228499	-3.49399
PCBP2	ES	22055	12:13:00	11.2	14.1	0	1	0.0899	0.0121	-0.00687273	0.960367	-3.3198	0.0022248	0.0226071	-3.48067
PCBP2	ES	22058	12	11.2	13	0	1	0.3066	0.0342	-0.0332424	0.762133	-3.89604	0.000457727	0.00679215	-1.95184
TARBP2	AP	22067	1.1	NA	NA	0	0.9005	0.8861	0.1859	-0.187454	0.515613	-3.89952	0.000694353	0.00937782	-2.09893
TARBP2	AP	22068	2	NA	NA	0	0.9005	0.8861	0.1859	0.187454	0.484388	3.89952	0.000694353	0.00937782	-2.09893
TARBP2	ES	22072	8	7.2	9.1	0	0.9983	0.5217	0.0708	-0.049675	0.911271	-5.04824	1.77867e-05	0.000523218	1.27874
ATF7	AT	22093	14	NA	NA	0	1	0.2776	0.0423	-0.0254758	0.0610803	-3.22887	0.00283229	0.027036	-3.71146
CALCOCO1	RI	22108	14.3	14.2	14.4	0	1	0.9838	0.1924	0.176348	0.235011	5.55909	3.67067e-06	0.000143938	2.82501
CALCOCO1	AA	22109	14.1	13	14.2	0	0.9913	0.0492	0.005	0.00246563	0.998786	3.31135	0.00232943	0.0233784	-3.5026
SMUG1	ES	22138	2.2	1.1	4.1	0	0.9686	1	0.1076	-0.104359	0.200085	-3.82126	0.000584994	0.00826932	-2.16689
NFE2	AP	22151	1	NA	NA	0	0.8202	0.4115	0.0522	0.0494227	0.959121	3.18097	0.00438505	0.0375003	-3.83006
NFE2	AP	22152	3.1	NA	NA	0	0.8202	0.4115	0.0522	-0.0494227	0.0408792	-3.18097	0.00438505	0.0375003	-3.83006
ZNF385A	AP	22176	1	NA	NA	0	0.9616	1	0.239	0.239881	0.254058	4.8344	3.54669e-05	0.000909394	0.621136
ZNF385A	AP	22177	4.1	NA	NA	0	0.9616	1	0.2403	-0.226703	0.72357	-4.58586	7.18253e-05	0.00159715	-0.0791465
ITGA7	AP	22209	3	NA	NA	0	0.8831	0.8443	0.1669	-0.1367	0.887414	-3.80235	0.000885252	0.0113162	-2.33826
ITGA7	AP	22211	1	NA	NA	0	0.8831	0.7217	0.1406	0.0907708	0.0854089	3.37487	0.00254566	0.0250228	-3.37131
BLOC1S1	AP	22229	1	NA	NA	0	1	0.2804	0.0374	-0.0358424	0.972855	-4.70584	4.48074e-05	0.00108976	0.33328
BLOC1S1	AP	22230	2	NA	NA	0	1	0.2804	0.0374	0.0358424	0.0271455	4.70584	4.48074e-05	0.00108976	0.33328
CD63	AP	22245	3.1	NA	NA	0	1	0.1555	0.0199	0.0150727	0.0692182	3.63659	0.000942095	0.0118532	-2.65312
MMP19	ES	22271	6.6	6.4	6.8	0	0.9791	0.3345	0.0433	0.0457032	0.960772	4.84774	3.41459e-05	0.000882213	0.658878
CDK2	ES	22324	1.3	1.1	2.1	0	0.9913	0.092	0.0147	0.0111063	0.989362	2.92571	0.00631183	0.0489746	-4.45022
SUOX	ES	22340	3	2	5.2	0	1	0.6346	0.1149	0.115848	0.661685	5.14716	1.23127e-05	0.000386514	1.61656
RPL41	RI	22365	1.2	1.1	1.3	0	1	0.3541	0.0216	0.0104485	0.0371758	3.61752	0.000992829	0.0123571	-2.70388
MYL6B	AD	22372	5.2	5.1	6	0	1	0.0567	0.0087	0.00717273	0.989792	3.16328	0.00336562	0.030783	-3.87587
MYL6B	AA	22373	2.1	1	2.2	0	0.9913	0.2434	0.0198	0.0132563	0.0221862	3.56512	0.00118022	0.0140641	-2.84804
MYL6	AA	22381	3.1	2.1	3.2	0	0.9895	0.2474	0.0423	-0.0292788	0.9754	-3.77757	0.000637575	0.00883664	-2.27442
SMARCC2	RI	22390	28.2	28.1	28.3	0	0.9983	0.3568	0.0474	0.0319688	0.938265	3.88762	0.000486655	0.0071266	-1.98749
SMARCC2	AD	22391	28.2:28.3	28.1	29	0	1	0.6316	0.1187	0.217918	0.732659	8.66584	5.65743e-10	1.20696e-07	11.6913
SMARCC2	ES	22392	28.3	28.1	29	0	0.8866	1	0.227	0.164022	0.199082	3.99361	0.000459227	0.00680693	-1.79223
SMARCC2	ES	22393	18	17	19	0	1	0.542	0.1001	-0.134961	0.35012	-8.07713	2.76318e-09	4.20194e-07	10.0805
NABP2	RI	22409	1.2:1.3	1.1	1.4	0	0.9983	0.8416	0.1203	0.0728	0.397791	3.16312	0.00343638	0.0312545	-3.87411
COQ10A	AP	22414	1	NA	NA	0	0.9686	0.9612	0.1649	0.105717	0.502635	3.34715	0.00223251	0.0226738	-3.41478
COQ10A	AP	22415	2	NA	NA	0	0.9686	0.9612	0.1627	-0.107303	0.449773	-3.37923	0.00205304	0.0212599	-3.33413
RBMS2	ES	22466	4	3	5	0	0.9948	0.1789	0.0315	0.0226576	0.970271	4.43139	9.93892e-05	0.00204876	-0.454024
NACA	AD	22502	1.2	1.1	2.2	0	1	0.2078	0.0243	0.0285061	0.0481167	6.15857	6.34194e-07	3.45372e-05	4.58637
TMEM194A	ES	22513	3.2:4	3.1	5	0	0.9372	0.4709	0.088	0.0669214	0.931179	3.10022	0.00441755	0.0376976	-4.01847
STAT6	AP	22519	3	NA	NA	0	1	0.5072	0.0441	0.0208697	0.0272167	3.52135	0.00129177	0.0149909	-2.95812
STAT6	AP	22520	2.1	NA	NA	0	1	0.5285	0.0494	-0.0202515	0.95478	-3.11759	0.0037923	0.0336695	-3.98935
ARHGAP9	AP	22583	7	NA	NA	0	0.9494	1	0.1425	-0.128755	0.373017	-2.94228	0.00615873	0.0481694	-4.40543
ARHGAP9	AP	22584	1	NA	NA	0	0.9494	0.8464	0.1207	0.107752	0.0750641	4.36274	0.000134845	0.0026015	-0.701891
MARS	AT	22593	21.2	NA	NA	0	1	0.3161	0.0579	0.048703	0.768767	3.58312	0.00109113	0.0132577	-2.79516
MARS	AT	22594	22	NA	NA	0	1	0.3161	0.0579	-0.0487	0.231235	-3.58276	0.0010922	0.0132634	-2.79611
MARS	ES	22602	6	5.2	7.1	0	1	0.0556	0.0078	0.00724545	0.993868	2.93782	0.00602306	0.0474291	-4.42692
DCTN2	ES	22641	7	2	8	1	0.9721	0.7597	0.0846	0.0374656	0.0268692	3.25804	0.00268105	0.0259645	-3.63719
DCTN2	ES	22643	07:08:00	2	10	0	0.9983	0.6155	0.0548	0.009625	0.00690462	3.17147	0.00336257	0.0307615	-3.85342
DTX3	AD	22661	1.2:1.3	1.1	1.5	0	0.9948	0.9417	0.1948	0.184972	0.551151	4.64769	5.64812e-05	0.00131823	0.130971
DTX3	ES	22662	1.3	1.1	1.5	0	0.9668	0.6138	0.1127	0.0832094	0.799545	3.35368	0.00208216	0.0214804	-3.39497
ARHGEF25	AP	22664	1	NA	NA	0	0.9354	0.732	0.1718	-0.205148	0.332272	-5.25444	1.07126e-05	0.000343184	1.81463
ARHGEF25	AP	22665	3	NA	NA	0	0.9354	0.732	0.1718	0.205148	0.667728	5.2544	1.07138e-05	0.000343184	1.81452
OS9	ES	22693	13	12	14	0	1	0.5092	0.0784	0.0393152	0.700524	3.1538	0.00345018	0.0313152	-3.89948
TSPAN31	AT	22723	6.2	NA	NA	0	1	0.3214	0.0384	0.0196606	0.0364848	3.51339	0.00132006	0.0152228	-2.97902
TSPAN31	AT	22724	7	NA	NA	0	1	0.3214	0.0384	-0.0196606	0.963515	-3.51339	0.00132006	0.0152228	-2.97902
USP15	ES	22830	8	6	9	0	0.9895	0.6047	0.0952	-0.124019	0.808575	-5.76094	2.26193e-06	9.77457e-05	3.34078
TMEM5	ES	22852	3	2	4	0	1	0.8512	0.1183	-0.0587515	0.345745	-2.92926	0.00615542	0.0481521	-4.44738
C12orf66	AT	22857	4	NA	NA	0	1	0.5815	0.1035	-0.138948	0.53482	-7.23825	2.84501e-08	2.67735e-06	7.71787
C12orf66	AT	22858	3.2	NA	NA	0	1	0.5815	0.1035	0.138948	0.46518	7.23825	2.84501e-08	2.67735e-06	7.71787
MSRB3	AT	22871	7.2	NA	NA	0	1	0.1852	0.027	0.0209455	0.0154394	4.28005	0.000153692	0.00288283	-0.883218
MSRB3	AT	22872	8	NA	NA	0	1	0.1852	0.027	-0.0209485	0.984559	-4.28089	0.000153322	0.0028771	-0.880843
TMBIM4	AT	22891	9.3	NA	NA	0	1	0.7674	0.1194	-0.111582	0.481942	-4.17637	0.000206831	0.00362432	-1.17487
TMBIM4	AT	22893	11	NA	NA	0	1	0.7674	0.1194	0.111582	0.518058	4.17642	0.0002068	0.00362432	-1.17472
YEATS4	ES	23317	03:04:00	2	5	0	1	0.2094	0.031	-0.0239152	0.971361	-4.26214	0.0001618	0.00298957	-0.933755
RAB3IP	AP	23342	2	NA	NA	0	1	0.3463	0.0792	-0.108994	0.157782	-6.10043	7.51433e-07	3.99806e-05	4.41584
RAB3IP	AP	23343	5.1	NA	NA	0	1	0.9765	0.1793	0.207597	0.554738	4.71444	4.36978e-05	0.0010675	0.358116
RAB3IP	AP	23345	1	NA	NA	0	1	0.7846	0.1217	-0.0986061	0.287482	-3.20062	0.00305127	0.0286165	-3.78248
PTPRB	AT	23385	19.2	NA	NA	0	1	0.6953	0.0823	0.0302242	0.0212636	3.30779	0.00229717	0.0231497	-3.51131
PTPRB	AT	23386	35	NA	NA	0	1	0.6953	0.0823	-0.0302242	0.978736	-3.30779	0.00229717	0.0231497	-3.51131
GLIPR1L2	AT	23458	6.2	NA	NA	0	1	0.3213	0.0631	0.0943303	0.885065	8.302	1.49998e-09	2.62947e-07	10.7007
GLIPR1L2	AT	23461	8	NA	NA	0	1	0.3213	0.0631	-0.0943273	0.114936	-8.30156	1.50177e-09	2.62947e-07	10.6995
NAP1L1	AP	23467	1	NA	NA	0	1	0.6648	0.0797	-0.0699576	0.812555	-3.33899	0.00211357	0.0217382	-3.43153
NAP1L1	AP	23468	7.1	NA	NA	0	1	0.6648	0.0797	0.0699576	0.187445	3.33899	0.00211357	0.0217382	-3.43153
OSBPL8	ES	23501	6	5	7.1	0	0.7958	1	0.1839	0.117554	0.288214	3.49606	0.00173856	0.0187592	-3.06398
TSPAN19	ES	23575	5	4	6	0	0.8447	1	0.2482	0.224054	0.685216	3.40224	0.00220209	0.0224125	-3.29336
DUSP6	ES	23618	2.2	1	3	0	1	0.1769	0.0231	0.0360879	0.954426	7.33832	2.14532e-08	2.15749e-06	8.00349
GALNT4	AP	23640	3.1	NA	NA	0	0.9948	0.6972	0.0734	0.054525	0.887597	4.23918	0.000181345	0.00326095	-1.02043
GALNT4	AP	23641	1	NA	NA	0	0.9948	0.6972	0.0734	-0.054525	0.112403	-4.23918	0.000181345	0.00326095	-1.02043
DCN	AT	23652	12	NA	NA	0	1	0.1893	0.0248	-0.0122788	0.983091	-4.52531	7.57323e-05	0.00166414	-0.185782
DCN	AT	23653	5	NA	NA	0	1	0.0437	0.0039	0.00212424	0.00338939	2.94457	0.00592062	0.0468743	-4.41076
DCN	AT	23655	6	NA	NA	0	1	0.1381	0.0205	0.00952727	0.0113515	3.90983	0.000440333	0.00657752	-1.91407
MRPL42	AT	23697	8.4	NA	NA	0	1	0.4878	0.0681	-0.0625455	0.92823	-4.50457	8.04239e-05	0.00174456	-0.24513
MRPL42	AT	23698	6.2	NA	NA	0	1	0.3106	0.0535	0.0480212	0.0591258	4.48344	8.54985e-05	0.0018258	-0.305525
SOCS2	AP	23705	1	NA	NA	0	0.9599	1	0.1951	-0.120428	0.538538	-3.52359	0.00132062	0.0152252	-2.95663
SOCS2	AP	23708	2	NA	NA	0	0.9599	0.5445	0.0947	0.0419906	0.0949369	2.94948	0.00594427	0.0470023	-4.39366
NR2C1	AT	23741	12.2	NA	NA	0	1	0.5744	0.0892	0.117073	0.161258	8.01242	3.29805e-09	4.83143e-07	9.901
NR2C1	AT	23742	15	NA	NA	0	1	0.5744	0.0892	-0.117073	0.838742	-8.01242	3.29805e-09	4.83143e-07	9.901
SNRPF	AT	23808	5.2	NA	NA	0	1	0.1499	0.0163	-0.0171182	0.0179076	-3.95804	0.000384436	0.00593231	-1.78161
SNRPF	AT	23809	7	NA	NA	0	1	0.1291	0.0085	-0.0114152	0.00753182	-4.74141	4.03934e-05	0.00101158	0.43602
SNRPF	AT	23810	4	NA	NA	0	1	0.1534	0.0197	0.0285455	0.974561	5.81468	1.73365e-06	7.8709e-05	3.57648
NEDD1	ES	23841	2.2:2.3	1	3	0	0.9337	0.7561	0.1386	0.146772	0.820045	3.57933	0.00113559	0.0136723	-2.81076
TMPO	AT	23844	10	NA	NA	0	1	0.401	0.062	-0.0954333	0.777726	-8.1759	2.11123e-09	3.39869e-07	10.3537
TMPO	AT	23845	4	NA	NA	0	1	0.4081	0.0601	0.0897727	0.211092	8.17849	2.09644e-09	3.38966e-07	10.3608
TMPO	ES	23849	06:07:08	5.1	9	0	1	0.3711	0.0697	0.0317182	0.892135	2.95523	0.0057621	0.0459587	-4.38519
TMPO	ES	23850	07:08:00	5.1	9	0	0.8168	0.8931	0.1736	0.113953	0.188302	3.14397	0.0060458	0.0474975	-3.93273
ARL1	AT	23945	7.2	NA	NA	0	1	0.2257	0.0142	0.00485758	0.00666212	3.52943	0.00126363	0.0147532	-2.93688
ARL1	AT	23946	8	NA	NA	0	1	0.2257	0.0142	-0.00485758	0.993338	-3.52943	0.00126363	0.0147532	-2.93688
ARL1	ES	23953	3	1	5	0	1	0.0419	0.0079	0.0102242	0.989764	5.13552	1.27406e-05	0.000397957	1.58253
GNPTAB	AT	24002	3	NA	NA	0	1	0.1445	0.0162	0.00991818	0.0134045	2.91633	0.00636064	0.0492751	-4.47824
C12orf73	AT	24069	6	NA	NA	0	1	0.6569	0.1068	-0.07	0.815658	-3.09358	0.00403667	0.0351643	-4.04863
NFYB	AP	24093	2	NA	NA	0	1	0.6721	0.1125	-0.143073	0.3437	-6.5124	2.26937e-07	1.45174e-05	5.62096
NFYB	AP	24094	1	NA	NA	0	1	0.6721	0.1125	0.143073	0.6563	6.5124	2.26937e-07	1.45174e-05	5.62096
ISCU	ES	24244	2	1	3	0	1	0.4804	0.079	0.0627394	0.0958455	4.99335	1.93335e-05	0.000560467	1.16746
SSH1	AT	24255	16	NA	NA	0	1	0.3535	0.043	-0.0220212	0.956735	-3.09868	0.00398354	0.0348682	-4.03606
SSH1	AT	24256	15.2	NA	NA	0	1	0.3535	0.043	0.0220212	0.0432652	3.09868	0.00398354	0.0348682	-4.03606
UNG	AP	24277	1	NA	NA	0	0.9878	0.8493	0.1922	0.232719	0.171328	6.73223	1.40765e-07	9.97798e-06	6.13692
UNG	AP	24278	2.1	NA	NA	0	0.9878	0.8493	0.1922	-0.232719	0.828672	-6.73223	1.40765e-07	9.97798e-06	6.13692
MVK	ES	24337	6	5	7	0	0.9983	0.442	0.0565	-0.0429375	0.955511	-5.79826	2.03098e-06	8.90794e-05	3.44886
GIT2	ES	24370	19	18.2	20	0	0.993	0.7463	0.1215	-0.0510091	0.894111	-3.88683	0.000469723	0.00692964	-1.97706
ANKRD13A	AP	24394	1	NA	NA	0	0.9808	0.5926	0.078	0.0585061	0.085753	3.6429	0.000925859	0.0116924	-2.63629
ANKRD13A	AP	24395	2	NA	NA	0	0.9808	0.5926	0.078	-0.0585061	0.914247	-3.6429	0.000925859	0.0116924	-2.63629
C12orf76	AT	24405	11	NA	NA	0	1	0.5345	0.0885	-0.0635	0.304886	-3.60835	0.00101817	0.0125728	-2.72825
IFT81	AT	24409	12	NA	NA	0	1	0.4378	0.0489	0.0363182	0.098553	3.46346	0.0015118	0.0168409	-3.10968
IFT81	AT	24410	20	NA	NA	0	1	0.4378	0.0489	-0.0363152	0.901445	-3.46312	0.00151317	0.0168485	-3.11055
IFT81	AD	24411	1.2	1.1	2	0	0.9878	0.8779	0.1644	0.170575	0.590969	4.39199	0.000117449	0.00233032	-0.592636
ATP2A2	RI	24418	21.2:21.3	21.1	21.4	0	1	0.1583	0.0235	0.0535576	0.959306	10.1973	1.12685e-11	4.9523e-09	15.6777
VPS29	ES	24446	3.1	1	5	0	0.9965	0.7862	0.1463	0.0836313	0.27818	2.95703	0.00583171	0.046329	-4.37563
TCTN1	ES	24463	00:15:16.100000	14	16.2	0	1	0.2379	0.0419	-0.0341152	0.933955	-3.45693	0.00153877	0.0170772	-3.1267
HVCN1	AP	24489	1	NA	NA	0	0.7766	1	0.2113	0.144338	0.318381	3.01393	0.00574403	0.0458396	-4.21537
ATXN2	ES	24518	21	20	22	0	0.9983	0.857	0.1221	-0.0982909	0.684797	-3.47585	0.00146186	0.0164438	-3.07734
MAPKAPK5	AD	24542	15.2	15.1	16	0	1	0.5995	0.0825	0.0724303	0.48853	3.81737	0.000570575	0.00811771	-2.16646
RPL6	AD	24584	1.2	1.1	2	0	1	0.6051	0.0867	0.0918242	0.115655	7.52237	1.28007e-08	1.42421e-06	8.52627
OAS1	AT	24600	7	NA	NA	0	1	0.1553	0.0216	-0.0169758	0.0284909	-4.41888	0.000103047	0.00210246	-0.489649
OAS2	AT	24607	10.3	NA	NA	0	1	0.6594	0.0922	-0.077803	0.809423	-3.78635	0.000622167	0.00867205	-2.25064
OAS2	AT	24609	2.2	NA	NA	0	1	0.6594	0.0922	0.077803	0.190577	3.78635	0.000622167	0.00867205	-2.25064
SLC8B1	AD	24641	3.2	3.1	4	0	0.9913	0.3326	0.0416	0.038003	0.946289	4.3124	0.000140051	0.00268037	-0.791805
TBX5	AP	24649	1	NA	NA	0	0.9232	0.8562	0.1045	-0.133142	0.235919	-7.48464	2.12237e-08	2.14422e-06	8.08955
TBX5	AP	24650	2	NA	NA	0	0.9232	0.8562	0.1045	0.133142	0.764081	7.48464	2.12237e-08	2.14422e-06	8.08955
RPLP0	ES	24730	5.2:5.3	4.2	6.2	0	1	0.1392	0.0168	-0.0105606	0.981005	-3.56474	0.00114743	0.0137865	-2.84377
RPLP0	AD	24737	1.5	1.4	2	0	1	0.0629	0.0066	-0.00780303	0.0223318	-5.1113	1.36796e-05	0.00042248	1.51171
RPLP0	AA	24740	1.3	1.1	1.4	0	1	0.2787	0.0398	0.0209152	0.126239	3.25735	0.00262674	0.0255977	-3.63952
DYNLL1	ES	24766	02:03:00	1	4.4	0	0.815	0.874	0.1996	-0.157405	0.762304	-4.14416	0.000571833	0.00812772	-1.6914
ANAPC5	AA	24862	9.1	8.3	9.2	0	1	0.4984	0.0745	0.136267	0.71047	8.57022	7.29793e-10	1.45127e-07	11.4325
RNF34	AT	24866	7.2	NA	NA	0	1	0.3246	0.0553	0.0560636	0.703471	4.97944	2.01379e-05	0.000578066	1.12693
RNF34	AT	24867	8	NA	NA	0	1	0.3246	0.0553	-0.0560636	0.296529	-4.97944	2.01379e-05	0.000578066	1.12693
KDM2B	RI	24879	26.2:26.3	26.1	26.4	0	0.9948	0.7514	0.0946	-0.0850909	0.887442	-3.79909	0.000600458	0.00844176	-2.21611
CLIP1	ES	24955	09:10:00	8	11.1	0	0.9599	0.5388	0.0585	-0.0749581	0.0796281	-6.03464	1.16642e-06	5.73065e-05	4.03923
RSRC2	AA	24966	9.1	8	9.2	0	1	0.4237	0.0657	-0.0647848	0.553162	-3.95565	0.00038703	0.00596218	-1.78817
RSRC2	ES	24970	00:04:05.100000	3	5.2	0	0.9983	0.7165	0.0859	-0.0602333	0.114205	-3.52169	0.00129055	0.0149807	-2.95721
RSRC2	ES	24972	4	3	5.2	0	1	0.9347	0.0835	-0.0451394	0.0992121	-3.3049	0.00231494	0.0232862	-3.51869
ABCB9	AP	24995	2	NA	NA	0	1	0.4958	0.0766	0.0696121	0.153539	5.52397	4.06958e-06	0.000155386	2.7218
ABCB9	AT	24998	14.2	NA	NA	0	1	0.8469	0.1233	0.0855879	0.705958	3.32618	0.00218719	0.0223178	-3.46434
ABCB9	AT	24999	13.2	NA	NA	0	1	0.8265	0.1172	-0.0919303	0.270283	-3.64865	0.000911304	0.0115751	-2.62095
ABCB9	ES	25001	10	9	11	0	0.9127	0.6319	0.1079	-0.0982565	0.8985	-3.44078	0.00226506	0.0229049	-3.22355
OGFOD2	AP	25005	1	NA	NA	0	0.9895	0.9575	0.1168	0.100734	0.229297	5.19381	1.16717e-05	0.00036956	1.69871
OGFOD2	AP	25006	2	NA	NA	0	0.9895	0.9575	0.1168	-0.100734	0.770703	-5.19381	1.16717e-05	0.00036956	1.69871
OGFOD2	ES	25010	6.3:8.1:8.2	6.2	8.3	0	0.993	1	0.1644	0.1362	0.251721	3.9743	0.000367186	0.00573866	-1.73677
ARL6IP4	RI	25024	5.2	5.1	5.3	0	1	0.3343	0.036	0.0159576	0.0336273	3.27412	0.00251242	0.0247791	-3.597
ARL6IP4	AD	25032	2.2	2.1	3.2	0	1	0.5827	0.0609	0.0295848	0.552908	3.36134	0.00199081	0.0207524	-3.37416
ARL6IP4	AD	25037	1.2:1.3	1.1	2.1	0	0.8499	1	0.2904	-0.475464	0.6257	-9.27433	5.45794e-09	7.38048e-07	9.95259
ARL6IP4	AD	25038	1.2	1.1	2.1	0	0.9703	0.8907	0.1794	-0.178158	0.888463	-7.96779	5.87109e-09	7.75685e-07	9.39441
PITPNM2	ES	25045	19	18	20	0	0.8499	0.8406	0.1703	0.197596	0.599675	4.71949	7.28404e-05	0.00161126	0.0679779
SNRNP35	AP	25074	2	NA	NA	0	1	0.3673	0.0622	-0.0508424	0.433633	-3.61476	0.00100038	0.0124229	-2.7112
SNRNP35	AP	25076	1	NA	NA	0	1	0.4118	0.0677	0.0498091	0.544611	3.28788	0.00242223	0.0240624	-3.56204
RILPL1	AP	25078	8	NA	NA	0	0.9965	0.5425	0.0652	0.0329697	0.0268485	2.92359	0.00624462	0.0486211	-4.46092
ZNF664	ES	25127	4	2.2	5	1	0.9197	0.4791	0.0781	0.0427296	0.183837	3.22832	0.00329535	0.0303806	-3.71107
ZNF664	RI	25135	1.3	1.2	1.4	0	0.9232	0.3419	0.0402	-0.0223571	0.0252148	-3.57669	0.00130873	0.0151278	-2.8461
NCOR2	AD	25143	46.2	46.1	47	0	1	0.5762	0.1221	0.223818	0.6965	10.5636	4.62076e-12	2.23157e-09	16.5866
NCOR2	ES	25144	46.1:46.2	45	47	1	0.9773	0.4825	0.1	0.135845	0.73538	7.89693	7.07629e-09	8.80988e-07	9.20469
NCOR2	ES	25145	46.1	45	47	1	0.9895	0.509	0.0949	-0.0910187	0.681535	-5.00684	2.0049e-05	0.000576268	1.15952
SFSWAP	ES	25214	15	14	16.1	0	0.9965	0.7987	0.0598	0.0257875	0.0442415	3.70275	0.000810843	0.0105648	-2.48435
EP400	ES	25233	24	23	25	0	0.9302	0.4553	0.0874	0.06928	0.917345	2.98751	0.00628398	0.0488275	-4.27252
EP400NL	AT	25241	6.2	NA	NA	0	1	0.8298	0.1593	0.140427	0.257608	5.24245	9.30706e-06	0.0003057	1.89553
EP400NL	AT	25242	13	NA	NA	0	1	0.8654	0.161	-0.164021	0.661386	-6.7366	1.18897e-07	8.63686e-06	6.27287
ANKLE2	AT	25297	10	NA	NA	0	1	0.2069	0.0316	0.0275121	0.0340197	4.30495	0.000143083	0.00272336	-0.812878
ANKLE2	AT	25298	13	NA	NA	0	1	0.2069	0.0316	-0.0275091	0.965979	-4.30442	0.000143302	0.00272542	-0.81438
GOLGA3	AT	25304	16.2	NA	NA	0	1	0.1497	0.023	0.00918182	0.0219091	2.99491	0.00520663	0.0426507	-4.28955
GOLGA3	AT	25305	22.2	NA	NA	0	1	0.0898	0.0118	0.00855455	0.0174864	3.31596	0.0022477	0.0227924	-3.49047
GOLGA3	AT	25306	24	NA	NA	0	1	0.1916	0.0313	-0.0177061	0.960605	-4.00646	0.000335283	0.00534072	-1.64796
PSPC1	AT	25404	12	NA	NA	0	1	0.4461	0.075	-0.0555909	0.26348	-2.97486	0.00548064	0.0442519	-4.33796
ZMYM5	AT	25405	8	NA	NA	0	1	0.5633	0.0865	-0.0666576	0.795635	-3.85486	0.000513772	0.00746422	-2.06439
ZMYM5	AT	25406	6.2	NA	NA	0	1	0.5633	0.0865	0.0666576	0.204365	3.85486	0.000513772	0.00746422	-2.06439
NUPL1	AT	25496	19	NA	NA	0	1	0.3331	0.053	-0.0490333	0.869035	-5.53251	3.96879e-06	0.000152332	2.74689
NUPL1	AT	25497	16.2	NA	NA	0	1	0.3331	0.053	0.0490333	0.130965	5.53251	3.96879e-06	0.000152332	2.74689
RPL21	AD	25524	1.4	1.3	2	0	0.9843	0.912	0.1835	-0.180648	0.708167	-6.75179	1.56824e-07	1.08537e-05	6.06375
RPL21	AD	25525	1.3:1.4	1.2	2	0	0.9965	0.9599	0.177	-0.241672	0.476122	-9.04438	2.77705e-10	7.01413e-08	12.4564
RPL21	AD	25528	1.2:1.3	1.1	2	0	1	0.0245	0.0021	0.00145152	0.00189242	3.54791	0.00120146	0.0142361	-2.88819
RPL21	AD	25529	1.2	1.1	2	0	1	0.0406	0.0044	0.00380909	0.00445303	5.87913	1.43527e-06	6.81181e-05	3.76595
GTF3A	ES	25533	5	4.2	6	0	1	0.0826	0.0117	0.0136	0.975658	3.69875	0.00079353	0.0103885	-2.48685
MTIF3	ES	25538	5	4.2	6	0	1	0.6189	0.0858	-0.0454848	0.170955	-3.00044	0.00513333	0.0421761	-4.27616
FLT1	AT	25556	16	NA	NA	0	1	0.7715	0.1303	0.133573	0.253705	5.70278	2.40715e-06	0.000103512	3.24748
FLT1	AT	25558	35	NA	NA	0	1	0.7715	0.1309	-0.133667	0.7444	-5.62611	3.01476e-06	0.00012302	3.02204
HMGB1	AP	25565	3	NA	NA	0	1	0.015	0.0028	-0.00444242	0.00514242	-5.62808	2.9974e-06	0.000122768	3.02783
RFC3	AT	25610	9	NA	NA	0	1	0.31	0.0386	0.0336152	0.939814	3.95715	0.000385394	0.005945	-1.78403
RFC3	AT	25611	10	NA	NA	0	1	0.31	0.0386	-0.0336121	0.0601848	-3.95668	0.000385906	0.00595081	-1.78533
SPG20	AP	25638	4	NA	NA	0	0.9616	0.9578	0.1653	-0.11493	0.636551	-4.35061	0.000147718	0.00279222	-0.763802
SPG20	AP	25639	2	NA	NA	0	0.9616	0.9662	0.1717	0.139133	0.311329	5.95972	1.63786e-06	7.53724e-05	3.73222
SUPT20H	ES	25661	26	25	27	0	1	0.765	0.1213	0.0891424	0.406971	5.1395	1.25929e-05	0.000394182	1.59415
SUPT20H	AA	25663	21.1	20	21.2	0	1	0.7298	0.1361	-0.0786545	0.725136	-2.91435	0.00639259	0.0494702	-4.48295
SUPT20H	AA	25665	21.2	20	21.3	0	0.9878	0.7341	0.1246	0.0821344	0.292766	3.34058	0.00215582	0.0220746	-3.42834
POSTN	ES	25671	21	20	22	0	1	0.7342	0.1081	-0.214861	0.462485	-12.9566	2.06237e-14	2.83241e-11	22.1113
POSTN	ES	25672	17:18:19	16	20	0	0.9284	1	0.2284	-0.259533	0.642335	-4.74529	6.23418e-05	0.00142253	0.187546
POSTN	ES	25673	18:19:00	16	20	0	1	0.2456	0.0258	-0.0204	0.958612	-3.87367	0.000487392	0.00713284	-2.01304
POSTN	ES	25674	19	16	20	0	0.9965	0.2309	0.0362	-0.0323485	0.930611	-3.52577	0.0012763	0.0148546	-2.9465
POSTN	ES	25675	17:18:00	16	19	0	0.9843	0.7578	0.0949	-0.0711939	0.149642	-3.03984	0.00463885	0.0390019	-4.18039
UFM1	AD	25698	2.2	2.1	3	0	1	0.3496	0.0369	-0.0220818	0.0712985	-3.51706	0.00130693	0.0151224	-2.96938
VWA8	AT	25741	26.2	NA	NA	0	1	0.5819	0.0882	0.0658212	0.142495	3.76597	0.000658504	0.00903245	-2.30581
VWA8	AT	25742	45	NA	NA	0	1	0.5819	0.0882	-0.0658212	0.857505	-3.76597	0.000658504	0.00903245	-2.30581
TSC22D1	AP	25782	1.1	NA	NA	0	1	0.5063	0.0515	0.0345394	0.0429909	4.76523	3.76808e-05	0.000957776	0.504918
TSC22D1	AP	25783	2	NA	NA	0	1	0.5063	0.0515	-0.0345394	0.957009	-4.76539	3.76635e-05	0.000957776	0.505371
TPT1	ES	25801	1.4	1.1	2	0	1	0.0394	0.0023	0.00194242	0.995677	4.0542	0.000292864	0.00477226	-1.51567
ZC3H13	AA	25815	16.1	15	16.2	0	0.9878	0.557	0.0822	-0.054497	0.678076	-3.5161	0.00131036	0.0151387	-2.9719
MED4	AD	25852	1.2	1.1	2	0	0.9965	0.5094	0.0728	0.0452875	0.697465	3.90318	0.000466053	0.00688705	-1.94528
FNDC3A	AP	25870	1	NA	NA	0	0.9948	0.9818	0.1401	-0.0977364	0.398089	-3.85767	0.000509752	0.00741561	-2.05674
CAB39L	AP	25883	1	NA	NA	0	0.9145	1	0.2471	0.31266	0.436356	7.61106	1.88061e-08	1.94468e-06	8.25289
CAB39L	AP	25885	4.1	NA	NA	0	0.9145	1	0.2454	-0.314783	0.562633	-7.60648	1.90329e-08	1.95445e-06	8.24071
EBPL	ES	25912	4.1:4.2	1	6	1	0.9215	0.6524	0.1307	-0.0745821	0.699143	-3.4373	0.001878	0.0198639	-3.19625
SPRYD7	ES	25916	2	1	3	0	1	0.2255	0.0402	-0.0281333	0.951912	-3.46735	0.00149594	0.0166989	-3.09953
TRIM13	AD	25922	1.2	1.1	1.4	0	0.9703	1	0.1529	0.154352	0.519606	4.78298	4.10525e-05	0.00102272	0.475783
SERPINE3	AT	25931	10.2	NA	NA	0	1	0.856	0.1101	-0.0695455	0.203197	-3.43461	0.0016345	0.0178957	-3.18476
SERPINE3	AT	25932	11	NA	NA	0	1	0.856	0.1101	0.0695455	0.796803	3.43461	0.0016345	0.0178957	-3.18476
DHRS12	AT	25950	10.3	NA	NA	0	1	0.3979	0.0542	-0.0313061	0.903505	-3.99469	0.000346638	0.005472	-1.68051
DHRS12	AT	25951	9	NA	NA	0	1	0.3979	0.0542	0.0313061	0.0964955	3.99501	0.000346321	0.00546896	-1.67962
NEK5	AT	25981	25	NA	NA	0	0.9983	0.6486	0.1343	-0.123539	0.232879	-3.92351	0.000423711	0.00638589	-1.87654
NEK5	AT	25982	22.2	NA	NA	0	0.9983	0.6486	0.1343	0.123539	0.767121	3.92351	0.000423711	0.00638589	-1.87654
NEK3	AP	25987	2	NA	NA	0	0.9145	0.724	0.1265	-0.12196	0.162674	-3.02236	0.00578096	0.0460841	-4.19286
LMO7	AP	26060	1	NA	NA	0	0.8866	1	0.2218	0.104206	0.0944797	3.00715	0.00523035	0.0427573	-4.25095
LMO7	AP	26061	5.1	NA	NA	0	0.8866	1	0.2218	-0.104206	0.90552	-3.00715	0.00523035	0.0427573	-4.25095
LMO7	AA	26065	19.1	18	19.2	0	0.9983	0.8043	0.1508	-0.11743	0.704918	-4.6549	5.19735e-05	0.00123067	0.186401
LMO7	ES	26067	12	9	13	0	0.986	0.9659	0.2594	-0.299185	0.79868	-7.28729	2.47716e-08	2.42464e-06	7.85795
LMO7	ES	26068	10:11:00	9	12	0	0.9913	1	0.1027	0.059497	0.0486	3.9852	0.000356057	0.00560458	-1.70671
SCEL	ES	26087	6	5	7	0	0.9023	0.9469	0.2667	0.74989	0.582331	30.1815	2.39957e-24	1.05456e-19	45.5698
RBM26	ES	26100	14	13.2	15	0	0.9895	0.4944	0.0892	-0.0755879	0.208806	-4.21501	0.000185193	0.00331738	-1.06641
ABCC4	AT	26108	23	NA	NA	0	1	0.4008	0.0608	0.0276788	0.0733182	3.06365	0.00436225	0.0373344	-4.12218
ABCC4	AT	26110	34	NA	NA	0	1	0.4008	0.0608	-0.0276758	0.92668	-3.06345	0.00436447	0.0373389	-4.12266
UGGT2	AT	26129	42	NA	NA	0	1	0.8193	0.1267	0.0716273	0.558198	2.99752	0.00517194	0.0424143	-4.28324
MBNL2	ES	26140	9	8	10	1	0.8656	0.6485	0.1499	0.116873	0.0957776	4.3228	0.000205983	0.00361667	-0.967023
MBNL2	ES	26141	09:10:00	8	11	0	0.918	1	0.2375	0.174477	0.132309	4.65536	5.89837e-05	0.00136289	0.116069
MBNL2	ES	26142	10	8	11	1	0.9581	0.6814	0.1389	0.153924	0.576132	5.5165	4.15992e-06	0.00015856	2.69984
MBNL2	ES	26144	7	6.3	8	0	0.9668	0.9217	0.1707	0.1962	0.208374	7.91668	5.34756e-09	7.25353e-07	9.44911
DOCK9	AP	26171	1	NA	NA	0	0.897	1	0.2222	0.329103	0.519148	7.99181	7.00867e-09	8.75048e-07	9.25639
DOCK9	AP	26172	3	NA	NA	0	0.897	1	0.2135	-0.345217	0.467579	-9.62616	1.25261e-10	3.71959e-08	13.359
DOCK9	AT	26173	35.2	NA	NA	0	1	0.1423	0.0204	0.0159939	0.0175697	4.49823	8.19139e-05	0.00176902	-0.263253
DOCK9	AT	26175	60	NA	NA	0	1	0.2023	0.0229	-0.0156485	0.979703	-4.03464	0.000309567	0.00499261	-1.56993
UBAC2	ES	26180	03:04:00	2	5	0	1	0.1528	0.0173	-0.00884242	0.987761	-3.05675	0.00444073	0.0378084	-4.13907
UBAC2	AD	26181	1.2	1.1	2	0	0.9965	0.5959	0.0573	0.0141545	0.0191712	3.1026	0.00394318	0.0346243	-4.0264
TMTC4	ES	26199	2	1	3	0	0.9825	0.7477	0.1236	0.0879656	0.774597	3.55871	0.00120092	0.0142361	-2.86484
NALCN	AT	26202	46	NA	NA	0	0.9965	0.9188	0.19	-0.161824	0.710824	-5.18768	1.09315e-05	0.000349141	1.73513
NALCN	AT	26204	7	NA	NA	0	0.9965	0.9188	0.1929	0.153933	0.258188	4.95708	2.15015e-05	0.000610825	1.0618
ITGBL1	AT	26207	12.2	NA	NA	0	1	0.6749	0.0817	0.116642	0.754158	8.1783	2.0975e-09	3.38966e-07	10.3603
ITGBL1	AT	26208	13	NA	NA	0	1	0.6749	0.0817	-0.116639	0.245844	-8.17823	2.0979e-09	3.38966e-07	10.3601
TEX30	ES	26216	5	4	6	0	1	0.472	0.0808	-0.0677939	0.878839	-3.57087	0.00112837	0.0136011	-2.82759
ARGLU1	AP	26231	2	NA	NA	0	1	0.5227	0.0875	-0.138679	0.152612	-7.01264	5.39645e-08	4.50881e-06	7.0706
ARGLU1	AP	26232	1	NA	NA	0	1	0.5227	0.0875	0.138679	0.847388	7.01264	5.39645e-08	4.50881e-06	7.0706
ARGLU1	ES	26233	4	3	5	0	0.9965	0.8097	0.1666	-0.113269	0.343349	-2.97603	0.00555767	0.0447014	-4.33019
CARKD	RI	26255	7.4	7.3	7.5	0	1	0.9968	0.141	0.0910576	0.169977	3.29716	0.00236316	0.0236144	-3.53842
CARKD	RI	26256	7.2	7.1	7.3	0	0.9825	0.8211	0.1282	0.127019	0.243006	5.39967	6.43048e-06	0.000228093	2.29416
ARHGEF7	AP	26279	1	NA	NA	0	0.808	1	0.0632	-0.0216048	0.0415635	-3.99742	0.000673015	0.00917962	-1.94897
TUBGCP3	AT	26302	21	NA	NA	0	1	0.3018	0.0451	0.0185091	0.0434	3.42573	0.00167419	0.0182303	-3.20783
TUBGCP3	AT	26303	23	NA	NA	0	1	0.3018	0.0451	-0.0185091	0.9566	-3.42573	0.00167419	0.0182303	-3.20783
MCF2L	AP	26314	1	NA	NA	0	0.9668	0.772	0.1503	0.105134	0.0817154	5.16456	1.27031e-05	0.00039735	1.61424
MCF2L	AP	26317	8	NA	NA	0	0.9668	1	0.2228	-0.258144	0.506155	-6.4326	3.2919e-07	1.99425e-05	5.27958
MCF2L	AP	26318	10	NA	NA	0	0.9668	0.8216	0.154	0.106797	0.104183	4.09941	0.000269112	0.00446636	-1.40803
CUL4A	AP	26366	2	NA	NA	0	0.9686	0.6619	0.1028	-0.122103	0.117617	-5.59886	4.01454e-06	0.000153685	2.79732
CUL4A	AP	26367	3	NA	NA	0	0.9686	0.6619	0.1092	0.112845	0.819273	4.51338	8.81717e-05	0.00187287	-0.28213
DCUN1D2	ES	26378	5	4	6	0	0.9773	0.6562	0.1483	0.165316	0.711585	4.11439	0.000257992	0.00434416	-1.36665
TMCO3	ES	26380	11	10	12	1	0.9284	0.3426	0.0444	-0.021364	0.928067	-3.39062	0.00235373	0.023563	-3.32735
TFDP1	AD	26387	13.3	13.2	14	0	0.9983	0.4479	0.0586	-0.06725	0.788498	-4.37134	0.000124569	0.00244183	-0.65067
TFDP1	ES	26393	7	6	8	0	1	0.2455	0.0354	0.058703	0.9216	7.48921	1.40448e-08	1.53926e-06	8.43234
CDC16	RI	26405	18.2	18.1	18.3	0	1	0.4201	0.0624	-0.0405576	0.881173	-3.85876	0.000508193	0.00739784	-2.05376
CCNB1IP1	ES	26422	6	5	8	0	1	0.6757	0.0992	-0.0619091	0.188855	-3.86881	0.000494081	0.00722351	-2.02632
CCNB1IP1	ES	26423	3.2	1	4	0	0.9965	0.1317	0.0225	-0.0159091	0.982867	-4.12771	0.000237628	0.00407555	-1.31099
APEX1	AD	26449	1.3	1.2	2.1	0	1	0.2546	0.0334	0.0324091	0.900223	3.73974	0.000708299	0.0095174	-2.3766
TMEM55B	AD	26455	1.2	1.1	2.1	0	0.9825	0.7874	0.103	0.0719063	0.445742	2.98223	0.00547084	0.0441809	-4.31532
RNASE1	ES	26468	2.2:2.3:3.1	1	3.2	0	0.9983	0.6009	0.0952	0.128455	0.568567	7.00524	5.51156e-08	4.57023e-06	7.04927
RNASE1	ES	26469	2.3:3.1	1	3.2	0	1	0.643	0.1041	0.152288	0.571241	8.82433	3.71917e-10	8.9317e-08	12.1177
RNASE1	ES	26471	2.2:2.3	1	3.1	0	1	0.3507	0.0249	0.0289636	0.0471697	7.32323	2.23844e-08	2.23072e-06	7.96049
RNASE1	ES	26472	2.3	1	3.1	0	1	0.3744	0.0315	0.0334303	0.0481606	8.51654	8.42376e-10	1.64537e-07	11.2867
NDRG2	AP	26484	2	NA	NA	0	0.9634	0.3596	0.0758	-0.124978	0.163297	-11.6243	5.94097e-13	4.28023e-10	18.7276
NDRG2	AD	26496	9.2	9.1	10	0	0.9546	0.2946	0.0452	0.0221344	0.0223308	3.11906	0.00385232	0.0340442	-3.98285
NDRG2	AD	26509	4.2:4.3:4.4:4.5	4.1	5.2	0	0.8761	1	0.2037	0.10127	0.11201	6.4694	6.62582e-07	3.59053e-05	4.76396
NDRG2	ES	26512	4.5	4.1	5.2	0	0.9319	1	0.1235	0.18119	0.6888	8.61939	1.43392e-09	2.57216e-07	10.8721
ZNF219	AP	26527	1	NA	NA	0	0.8202	0.744	0.131	0.07864	0.067231	2.98954	0.00625349	0.0486426	-4.26788
HNRNPC	ES	26556	2.2:2.3:2.4	1	3.2	0	1	0.7929	0.1351	-0.118952	0.412497	-4.47342	8.80153e-05	0.00187045	-0.334153
HNRNPC	ES	26558	2.4	1	3.2	0	1	0.5494	0.0713	-0.0629667	0.815874	-5.28609	8.18708e-06	0.000276774	2.02343
SUPT16H	AT	26571	2	NA	NA	0	1	0.1702	0.0225	0.0147303	0.0211409	4.26194	0.000161892	0.00298957	-0.934308
SUPT16H	AT	26572	28	NA	NA	0	1	0.1702	0.0225	-0.0147303	0.978859	-4.26194	0.000161892	0.00298957	-0.934308
TOX4	AD	26586	5.2	5.1	6	0	1	0.1371	0.0187	0.0171697	0.972061	4.29462	0.000147394	0.00278809	-0.842073
MRPL52	RI	26646	1.2:1.3	1.1	1.4	0	0.9895	0.5104	0.0703	0.0369437	0.0901338	3.27977	0.00253194	0.0248935	-3.58244
RBM23	ES	26652	6	5	7	0	0.9983	0.4563	0.0885	0.0414879	0.860726	2.93716	0.00603319	0.0474633	-4.4285
HAUS4	ES	26677	3	2	4	0	1	0.1341	0.0205	0.0154182	0.962733	4.05691	0.000290624	0.00474612	-1.50816
PSMB5	AD	26693	1.3	1.2	2	0	1	0.0681	0.0056	-0.00401212	0.0081	-3.45143	0.00156186	0.0172811	-3.14103
CDH24	ES	26700	9	8	10	0	0.8307	0.9484	0.2007	0.127419	0.427694	3.16982	0.00608534	0.0477142	-3.88714
ACIN1	AP	26701	1	NA	NA	0	1	0.6905	0.0997	-0.1597	0.568795	-9.2951	1.09061e-10	3.34001e-08	13.3657
ACIN1	AP	26702	9.1	NA	NA	0	1	0.6905	0.0997	0.1597	0.431205	9.2951	1.09061e-10	3.34001e-08	13.3657
ACIN1	ES	26708	4	3	5	0	0.9965	0.7591	0.124	-0.112164	0.721824	-3.91415	0.00043502	0.00652277	-1.90223
SLC7A8	AP	26711	4	NA	NA	0	0.9895	0.5654	0.0625	0.0509212	0.0384879	3.37816	0.00190296	0.0200844	-3.33086
DHRS4	ES	26782	04:05:06	3	7.1	0	1	0.7124	0.08	0.0571333	0.784912	3.36445	0.00197427	0.0206128	-3.36616
DHRS4L2	AP	26795	2	NA	NA	0	0.9913	0.7268	0.1305	-0.104652	0.809332	-3.6444	0.000922042	0.0116576	-2.63229
DHRS4L2	AP	26796	1	NA	NA	0	0.9913	0.7268	0.1305	0.104655	0.190667	3.64453	0.000921702	0.0116576	-2.63193
DHRS4L2	ES	26804	4:5:6:7	3	8.1	0	1	0.2306	0.036	0.0201394	0.96907	3.24665	0.00270223	0.026135	-3.66658
DCAF11	AA	26840	3.1	2.4	3.2	0	0.8499	0.8182	0.1475	-0.118088	0.727098	-3.4804	0.00188313	0.0199038	-3.11062
DCAF11	AD	26842	2.5	2.4	3.1	0	0.9895	0.3246	0.0514	0.0393375	0.896368	4.62017	6.11279e-05	0.00140211	0.05268
PSME1	RI	26852	10.2:10.3	10.1	10.4	0	1	0.0673	0.0116	0.00592424	0.0146136	4.43532	9.8266e-05	0.00203132	-0.442817
EMC9	AA	26856	3.1:3.2	2	3.3	0	0.986	0.6681	0.126	-0.119725	0.216337	-4.49744	8.6904e-05	0.00184957	-0.295306
GMPR2	AP	26912	1.1	NA	NA	0	1	0.7789	0.1182	0.0796333	0.540902	2.98786	0.00530148	0.0431942	-4.3066
GMPR2	AP	26913	2.1	NA	NA	0	1	0.7789	0.1182	-0.0796333	0.459098	-2.98786	0.00530148	0.0431942	-4.3066
GMPR2	ES	26924	4	3.2	5	0	1	0.6445	0.0636	-0.0470455	0.119162	-4.08995	0.000264591	0.00442343	-1.41629
GMPR2	RI	26927	2.2	2.1	2.3	0	0.993	0.8469	0.1099	0.0568031	0.421329	3.39845	0.00184811	0.0196517	-3.28042
TINF2	RI	26931	6.6	6.5	6.7	0	1	0.2446	0.0324	-0.0196364	0.953688	-2.97467	0.00548337	0.0442658	-4.33843
TINF2	RI	26932	6.4	6.3	6.5	0	1	0.3486	0.0518	-0.0280606	0.893315	-3.22262	0.00287937	0.0273902	-3.72719
TINF2	RI	26933	6.2	6.1	6.3	0	1	0.2911	0.048	-0.0251939	0.907306	-3.94188	0.000402352	0.00613765	-1.82607
TINF2	ES	26935	2	1	3	0	1	0.1567	0.018	0.0177606	0.978589	4.10613	0.000252686	0.00427774	-1.37119
CIDEB	ES	26959	2	1	3	0	0.9267	0.9482	0.1727	0.131068	0.387934	3.39863	0.00207448	0.0214214	-3.29243
LTB4R	AP	26963	1	NA	NA	0	1	0.8965	0.1627	-0.102682	0.485883	-3.56406	0.00114958	0.013796	-2.84557
LTB4R	AP	26964	2.1	NA	NA	0	1	0.8965	0.1627	0.102682	0.514117	3.56406	0.00114958	0.013796	-2.84557
ADCY4	RI	26971	18.6	18.5	18.7	0	0.7557	1	0.1582	0.163075	0.176475	3.74327	0.00131548	0.0151779	-2.5702
RIPK3	AD	26981	5.2	5.1	6	0	0.9564	0.8073	0.1372	0.117	0.12424	6.54517	3.84424e-07	2.25563e-05	5.23298
NFATC4	AP	26983	4.1	NA	NA	0	0.9616	1	0.1808	-0.177783	0.602725	-3.14873	0.00372631	0.0332313	-3.90559
NFATC4	AP	26986	9.1	NA	NA	0	0.9616	0.866	0.1703	0.165883	0.260087	3.47562	0.00159356	0.0175303	-3.08976
NFATC4	RI	26991	12.3	12.2	12.4	0	1	0.895	0.1407	0.133991	0.550223	5.12739	1.30485e-05	0.000405761	1.55875
NFATC4	AD	26993	12.2	12.1	12.4	0	0.9965	0.7911	0.1221	-0.0878719	0.831286	-4.24133	0.000180244	0.00324778	-1.01444
CBLN3	AP	26997	1	NA	NA	0	0.9948	0.6174	0.0877	0.0577909	0.466938	3.55644	0.00117379	0.0140027	-2.8657
CBLN3	AP	26998	2	NA	NA	0	0.9948	0.6174	0.0877	-0.0577879	0.533064	-3.55628	0.00117429	0.0140048	-2.86611
KHNYN	AD	27003	2.2	2.1	3	0	0.8307	0.945	0.1938	0.17017	0.59152	3.87797	0.000963074	0.0120722	-2.26062
STXBP6	AT	27031	12	NA	NA	0	0.9913	0.2923	0.0356	-0.00985152	0.984902	-2.91859	0.00632425	0.0490537	-4.47284
STXBP6	AT	27032	11	NA	NA	0	0.9913	0.2923	0.0356	0.00985152	0.0150985	2.91859	0.00632425	0.0490537	-4.47284
COCH	AT	27088	11	NA	NA	0	0.9599	0.7328	0.1118	0.125393	0.5858	4.7774	5.25584e-05	0.00124185	0.323599
COCH	AT	27090	12	NA	NA	0	0.9599	0.7328	0.1118	-0.125393	0.4142	-4.7774	5.25584e-05	0.00124185	0.323599
HEATR5A	AT	27111	3.2	NA	NA	0	1	0.5131	0.0696	0.0362848	0.0630606	3.32759	0.00217898	0.0222547	-3.46073
HEATR5A	AT	27113	37	NA	NA	0	1	0.5131	0.0697	-0.036103	0.936109	-3.35981	0.00199899	0.0208081	-3.3781
NUBPL	ES	27126	3	2	4	0	0.8918	0.4916	0.0882	-0.0975115	0.114922	-3.27903	0.00299593	0.0282482	-3.59097
AKAP6	AT	27135	10.2	NA	NA	0	0.9983	0.691	0.1113	0.0932061	0.147355	4.06053	0.000287657	0.00470836	-1.49811
AKAP6	AT	27136	14	NA	NA	0	0.9983	0.691	0.1113	-0.0932061	0.852645	-4.06053	0.000287657	0.00470836	-1.49811
SNX6	AA	27164	2.2	1	2.3	0	0.986	0.1299	0.0168	0.0116188	0.986172	3.53388	0.00128438	0.0149209	-2.92976
MBIP	ES	27247	7	6	8	0	1	0.1939	0.0234	-0.0176939	0.967217	-3.55041	0.00119329	0.0141968	-2.88161
SFTA3	ES	27255	5	4.2	6	0	0.9721	0.5822	0.0695	-0.0667935	0.881503	-5.43532	6.39609e-06	0.000227056	2.33057
SFTA3	ES	27265	4.2	2	5	1	0.904	0.7041	0.0868	0.0561833	0.779454	4.40262	0.000127844	0.002496	-0.621036
SFTA3	ES	27274	5	2	6	1	0.904	0.6056	0.1063	-0.0886867	0.402621	-4.41067	0.000125011	0.00244721	-0.598883
SFTA3	ES	27275	3:4.1:4.2	2	6	1	0.925	0.7611	0.1161	0.0670133	0.173041	3.21464	0.00314701	0.0292965	-3.74414
SFTA3	ES	27276	4.1:4.2	2	6	1	0.918	0.7394	0.1066	0.0968467	0.220294	4.25062	0.000194888	0.00345361	-1.03722
SFTA3	ES	27278	4.2	2	6	1	0.9319	0.7833	0.1363	0.142917	0.348452	5.32057	9.77367e-06	0.000316999	1.93829
SFTA3	ES	27280	00:03:04.100000	2	4.2	0	0.9511	0.8765	0.1427	-0.0606516	0.322272	-3.72719	0.000785253	0.0103262	-2.42874
NKX2-1	AP	27285	3.1	NA	NA	0	0.9651	0.7589	0.1035	0.120109	0.381602	5.32665	7.94454e-06	0.000269945	2.08281
NKX2-1	AP	27286	1	NA	NA	0	0.9651	0.3842	0.0592	-0.08455	0.214335	-7.16131	4.23047e-08	3.7036e-06	7.3525
NKX2-1	RI	27287	3.3	3.2	3.4	0	0.9599	0.5401	0.078	0.0665781	0.812472	4.73795	4.35653e-05	0.00106652	0.388321
NKX2-1	AA	27288	3.2:3.3	2	3.4	0	0.9197	1	0.1687	-0.217537	0.696079	-5.36319	8.67223e-06	0.00028983	2.05802
NKX2-1	ES	27289	3.2	2	3.4	0	0.8621	1	0.2162	-0.338011	0.455923	-8.2609	8.02933e-09	9.72102e-07	9.25769
MIPOL1	AT	27299	17	NA	NA	0	1	0.7526	0.1345	0.107552	0.699385	3.81065	0.000581383	0.00823152	-2.18472
MIPOL1	AT	27300	20	NA	NA	0	1	0.7339	0.1316	-0.11117	0.29463	-3.97614	0.000365286	0.00571913	-1.73171
SEC23A	AT	27347	23	NA	NA	0	1	0.6459	0.1057	0.0882879	0.699202	5.49296	4.45782e-06	0.00016831	2.63067
SEC23A	AT	27348	4.2	NA	NA	0	1	0.6356	0.1052	-0.0888788	0.299921	-5.58853	3.36653e-06	0.000134015	2.91157
CTAGE5	AP	27371	1	NA	NA	0	1	0.8224	0.187	0.120464	0.322229	3.30784	0.00229686	0.0231497	-3.51119
CTAGE5	AP	27372	2	NA	NA	0	1	0.8233	0.1086	-0.0888939	0.200629	-5.98664	1.04779e-06	5.27471e-05	4.08183
CTAGE5	ES	27377	21	20	22	0	1	0.3967	0.0667	-0.0659364	0.897941	-5.68203	2.55832e-06	0.000108526	3.18646
FKBP3	ES	27404	3	2	4	0	1	0.6884	0.102	-0.0749182	0.228159	-3.60839	0.00101806	0.0125728	-2.72815
LRR1	ES	27427	04:05:00	3	7	0	0.9511	1	0.219	-0.214324	0.579602	-3.97225	0.000439066	0.00657	-1.80765
LRR1	ES	27428	5	3	7	0	0.986	1	0.1361	-0.0951484	0.750583	-3.16873	0.00346061	0.031384	-3.85837
KLHDC2	RI	27443	7.2	7.1	7.3	0	1	0.731	0.1046	0.0576424	0.095797	3.75312	0.000682462	0.00926955	-2.34052
CDKL1	AT	27473	10	NA	NA	0	1	0.428	0.0758	-0.0512242	0.862597	-3.66535	0.000870271	0.0111636	-2.57633
CDKL1	AT	27474	9.3	NA	NA	0	1	0.428	0.0758	0.0512242	0.137403	3.66535	0.000870271	0.0111636	-2.57633
CDKL1	AA	27475	9.1	8	9.2	0	0.8482	0.9589	0.2534	0.149558	0.397793	3.13787	0.00451707	0.0382571	-3.92581
NIN	AT	27491	32.2	NA	NA	0	1	0.554	0.0823	0.0628758	0.174747	4.0109	0.000331103	0.00528754	-1.6357
NIN	AT	27492	33	NA	NA	0	1	0.5616	0.0831	-0.0568333	0.749953	-3.03738	0.0046684	0.0392063	-4.1864
NIN	ES	27495	18	17	19	0	1	0.8685	0.204	-0.113015	0.814395	-3.60451	0.00102895	0.0126845	-2.73844
PSMC6	AD	27551	1.2	1.1	2	0	0.9983	0.3043	0.0304	-0.0174697	0.0369985	-3.37501	0.00191911	0.020216	-3.33897
FERMT2	ES	27561	3	2	4	0	0.9058	0.1545	0.0092	-0.00458667	0.00218413	-3.50469	0.00147573	0.0165405	-3.01551
CNIH1	ES	27582	5	3	6.1	0	1	0.0935	0.0158	0.0112485	0.973894	5.43517	5.28295e-06	0.000193318	2.4609
CGRRF1	ES	27594	2	1	3	0	1	0.1147	0.0151	0.00796667	0.99488	3.07094	0.00428074	0.0368248	-4.1043
SAMD4A	ES	27598	13	12	14	0	0.9232	0.8316	0.097	0.0861	0.132855	5.10856	1.62404e-05	0.000484543	1.39913
KTN1	ES	27633	46	45	47	0	0.9983	0.2451	0.0217	0.0135333	0.0374061	3.326	0.00218824	0.0223233	-3.46479
KTN1	ES	27634	42	41	43	0	1	0.5412	0.0918	-0.0429636	0.523267	-3.01904	0.00489405	0.0406816	-4.23105
C14orf105	AT	27656	8	NA	NA	0	0.9948	0.5054	0.0849	-0.0486121	0.971352	-3.07596	0.00422544	0.0365045	-4.09198
C14orf105	AT	27658	6.2	NA	NA	0	0.9948	0.5054	0.0849	0.0486121	0.0286485	3.07596	0.00422544	0.0365045	-4.09198
L3HYPDH	AP	27738	2	NA	NA	0	0.9965	1	0.1384	0.100922	0.112588	4.13587	0.000242839	0.00414941	-1.30726
L3HYPDH	AP	27739	1	NA	NA	0	0.9965	1	0.1384	-0.100922	0.887412	-4.13587	0.000242839	0.00414941	-1.30726
PPM1A	ES	27778	3	2	5.1	0	0.8534	0.8604	0.1303	0.0682087	0.165093	3.92546	0.000693482	0.00937182	-2.06056
PRKCH	AP	27798	2	NA	NA	0	0.9913	0.5628	0.0848	0.0505333	0.0648667	3.387	0.00185831	0.0197125	-3.30807
PRKCH	AP	27799	1	NA	NA	0	0.9913	0.5628	0.0848	-0.0505333	0.935133	-3.387	0.00185831	0.0197125	-3.30807
WDR89	AP	27823	1	NA	NA	0	0.808	0.8421	0.1367	-0.109177	0.828324	-3.12065	0.00504806	0.0416546	-3.96618
WDR89	AP	27824	2	NA	NA	0	0.808	0.8421	0.1367	0.109177	0.171676	3.12065	0.00504806	0.0416546	-3.96618
SYNE2	ES	27846	118	117.2	119.2	0	0.9791	0.9554	0.1891	-0.158318	0.572195	-4.76269	3.79617e-05	0.000962135	0.497555
ZBTB1	AT	27892	4.2	NA	NA	0	1	0.4282	0.0621	-0.0388485	0.823	-3.88167	0.000476575	0.00700252	-1.99118
ZBTB1	AT	27893	5	NA	NA	0	1	0.4282	0.0621	0.0388485	0.177	3.88167	0.000476575	0.00700252	-1.99118
SPTB	AT	27908	36	NA	NA	0	1	0.9005	0.225	-0.21643	0.669488	-5.93337	1.22454e-06	5.94651e-05	3.92532
SPTB	AT	27909	32.2	NA	NA	0	1	0.9005	0.225	0.21643	0.330512	5.93337	1.22454e-06	5.94651e-05	3.92532
CHURC1	ES	27911	3.1:3.2	2	4	0	0.9983	0.8035	0.1059	-0.0729061	0.775932	-3.41233	0.00173582	0.018752	-3.24257
CHURC1	ES	27912	3.2	2	4	0	1	0.5535	0.0531	-0.0365061	0.918802	-4.28798	0.000150233	0.00282877	-0.860831
FNTB	AP	27914	1	NA	NA	0	1	0.6864	0.1081	0.0793364	0.710062	3.94002	0.000404468	0.00615711	-1.83119
FNTB	AP	27915	4	NA	NA	0	1	0.6864	0.1081	-0.0793364	0.289938	-3.94002	0.000404468	0.00615711	-1.83119
MAX	ES	28008	2	1.2	3	0	1	0.6121	0.0836	-0.0831909	0.501302	-4.73909	4.06674e-05	0.00101675	0.429321
FUT8	ES	28014	7	6	8	0	0.9651	0.4405	0.0542	0.0313143	0.0295167	3.66341	0.00104342	0.0127876	-2.62567
VTI1B	ES	28083	02:03:00	1	4	0	1	0.6489	0.1043	0.0700909	0.843985	3.19852	0.00306819	0.0287351	-3.78776
VTI1B	ES	28084	3	1	4	0	0.9983	0.0889	0.0114	0.00859062	0.979022	2.92981	0.0062468	0.0486211	-4.44046
RAD51B	AT	28107	13	NA	NA	0	1	0.733	0.1303	-0.147418	0.403709	-6.02207	9.44707e-07	4.82767e-05	4.18585
RAD51B	AT	28110	12	NA	NA	0	1	0.8282	0.1745	0.242752	0.3275	7.64037	9.21108e-09	1.08039e-06	8.85965
RAD51B	AT	28111	14	NA	NA	0	1	0.595	0.1178	-0.0794152	0.184783	-3.15599	0.00343047	0.0312267	-3.89403
SLC39A9	RI	28145	7.2	7.1	7.3	0	1	0.1459	0.0175	-0.00757879	0.992044	-3.2449	0.00271474	0.0262272	-3.671
COX16	ES	28178	3	1	4	1	1	0.1459	0.0285	-0.0318636	0.936962	-5.23443	9.52912e-06	0.000309982	1.87201
SIPA1L1	AA	28198	23.1	22	23.2	0	1	0.5421	0.0653	-0.0510788	0.63577	-4.17088	0.000210096	0.00366838	-1.19024
NUMB	ES	28288	13	12	14	0	1	0.9293	0.2221	0.450591	0.349005	14.9873	3.46972e-16	1.27073e-12	26.286
NUMB	ES	28293	11	10	12	0	1	0.1177	0.0219	0.0256121	0.957845	4.77706	3.64019e-05	0.000929569	0.539149
ZNF410	AA	28332	6.1	4.2	6.2	0	0.9983	0.2174	0.034	0.0313667	0.954489	4.90373	2.51371e-05	0.00069175	0.906587
COQ6	AP	28338	2	NA	NA	0	0.9948	0.455	0.0719	0.0524688	0.838149	3.03557	0.00477529	0.0398944	-4.18668
COQ6	AP	28340	1	NA	NA	0	0.9948	0.3882	0.069	-0.0532531	0.150197	-3.12152	0.00382793	0.0338627	-3.97682
ABCD4	ES	28396	2	1	3	0	0.9843	0.5877	0.093	0.09125	0.864557	5.03548	1.84555e-05	0.000541442	1.24198
FOS	RI	28494	2.5	2.4	2.6	0	1	0.549	0.0958	0.0312091	0.0598742	2.96021	0.00568943	0.045503	-4.37322
FLVCR2	AT	28510	14	NA	NA	0	1	0.377	0.0481	0.0428	0.0624364	3.2241	0.00286817	0.0273073	-3.72347
FLVCR2	AT	28511	13	NA	NA	0	1	0.377	0.0481	-0.042797	0.937562	-3.22383	0.00287022	0.0273209	-3.72415
TTLL5	AT	28521	34	NA	NA	0	1	0.2374	0.0217	0.00931818	0.0131591	3.36416	0.00197582	0.0206128	-3.36691
GPATCH2L	AT	28542	13	NA	NA	0	1	0.6087	0.1109	-0.084603	0.527468	-3.74457	0.000698867	0.00942669	-2.36359
SLIRP	AT	28617	4.2	NA	NA	0	1	0.221	0.0296	0.0168515	0.895517	3.39405	0.00182341	0.0194882	-3.28987
SLIRP	AT	28618	6	NA	NA	0	1	0.0285	0.0036	-0.00359697	0.00467727	-3.9953	0.000346041	0.0054665	-1.67883
TTC8	ES	28787	6	2	7	0	1	0.8938	0.1682	-0.116733	0.536076	-4.67008	4.97277e-05	0.00118645	0.23012
TTC7B	ES	28826	18	17	19	0	0.8883	0.5256	0.0925	-0.065	0.124256	-4.19926	0.000251164	0.0042602	-1.22849
C14orf159	AP	28835	3.1	NA	NA	0	0.9983	0.6733	0.1098	0.0582848	0.170912	3.02002	0.00488163	0.0405937	-4.22865
C14orf159	AP	28839	1	NA	NA	0	0.9983	0.7989	0.1296	-0.109212	0.547503	-4.84345	2.99844e-05	0.000792905	0.731524
C14orf159	AT	28841	22	NA	NA	0	1	0.194	0.0279	-0.0191909	0.971874	-4.54118	7.23252e-05	0.00160533	-0.140316
C14orf159	AT	28842	10.5	NA	NA	0	1	0.194	0.0279	0.0191909	0.0281258	4.54118	7.23252e-05	0.00160533	-0.140316
GPR68	AP	28871	2	NA	NA	0	0.8761	0.8676	0.1683	0.141258	0.813193	3.43894	0.00217637	0.0222331	-3.21891
GPR68	AP	28872	1	NA	NA	0	0.8761	0.8676	0.1683	-0.141258	0.186807	-3.43894	0.00217637	0.0222331	-3.21891
CCDC88C	AT	28876	5	NA	NA	0	1	0.6122	0.0808	0.0466485	0.113697	3.27203	0.00252639	0.0248692	-3.6023
CCDC88C	AT	28877	33	NA	NA	0	1	0.6122	0.0808	-0.0466485	0.886303	-3.27203	0.00252639	0.0248692	-3.6023
SMEK1	AD	28880	7.2	7.1	8	0	0.9965	0.6879	0.1114	-0.0730515	0.566389	-3.63784	0.00093885	0.0118225	-2.64978
SMEK1	RI	28882	1.2	1.1	1.3	0	0.9424	0.6755	0.1424	-0.0847633	0.897278	-3.61035	0.0011144	0.0134586	-2.74348
TC2N	ES	28885	10	9	11	0	1	0.2167	0.028	-0.0202061	0.964394	-3.75062	0.000687216	0.0093043	-2.34726
FBLN5	AP	28887	1	NA	NA	0	0.9913	0.4453	0.0584	0.0767719	0.905766	7.01105	6.43178e-08	5.17699e-06	6.9286
FBLN5	AP	28888	2	NA	NA	0	0.9913	0.4453	0.0584	-0.0767719	0.0942338	-7.01105	6.43178e-08	5.17699e-06	6.9286
FBLN5	ME	28892	6|7	5	8	0	1	1	0.0883	-0.150082	0.127577	-5.33053	7.18504e-06	0.000247661	2.15374
FBLN5	ES	28893	7	5	8	0	1	1	0.1959	0.179227	0.312747	5.35698	6.64758e-06	0.000233718	2.23136
FBLN5	ES	28894	6	5	8	0	0.9197	0.253	0.0343	-0.0228414	0.0413661	-2.97554	0.00588937	0.0466942	-4.31694
BTBD7	AT	29030	12	NA	NA	0	1	0.5997	0.0853	-0.0458758	0.741559	-3.19903	0.00306409	0.0287062	-3.78648
BTBD7	AT	29031	4.2	NA	NA	0	1	0.5997	0.0853	0.0458758	0.258441	3.19903	0.00306409	0.0287062	-3.78648
SERPINA1	AT	29100	5.2	NA	NA	0	1	0.1105	0.0135	-0.0121333	0.0145636	-3.53828	0.00123349	0.0145166	-2.91358
SERPINA1	AT	29101	6	NA	NA	0	1	0.1105	0.0135	0.0121333	0.985436	3.53828	0.00123349	0.0145166	-2.91358
SERPINA1	RI	29104	2.2:2.3	2.1	2.4	0	0.9808	0.5647	0.0689	0.0388061	0.945967	3.76421	0.00066172	0.00906807	-2.31054
SERPINA1	ES	29114	1.2:2.1:2.2:2.3:2.4	1.1	2.5	0	0.8377	1	0.3044	0.238154	0.200219	3.17963	0.00408616	0.0355135	-3.82925
SERPINA1	AA	29115	2.1:2.2:2.3:2.4	1.1	2.5	0	0.9721	0.973	0.1771	0.1707	0.801409	5.00511	2.18112e-05	0.000616041	1.10506
SERPINA1	ES	29117	2.1:2.2:2.4	1.1	2.5	0	0.8883	0.9889	0.161	0.101219	0.262041	3.68949	0.00106298	0.0129881	-2.58431
SERPINA1	AA	29123	2.1:2.2:2.3	1.1	2.4	0	0.9738	1	0.1924	0.209619	0.761905	5.73445	2.7303e-06	0.000114934	3.1842
SERPINA1	ES	29125	2.1:2.2	1.1	2.4	0	0.9127	1	0.1517	0.081	0.210038	3.28749	0.00275596	0.0265281	-3.56627
SERPINA1	ES	29129	1.2:2.1:2.2:2.3:2.4:2.5	1.1	3.2	0	0.9913	1	0.1842	0.124631	0.0858708	3.16285	0.00343882	0.0312703	-3.87479
SERPINA1	ES	29130	2.1:2.2:2.3:2.4:2.5	1.1	3.2	0	0.9948	1	0.2575	0.287972	0.514183	5.57249	3.89958e-06	0.000151128	2.79475
AK7	AT	29200	18	NA	NA	0	0.993	0.9488	0.217	-0.220918	0.692444	-6.05964	8.46486e-07	4.39213e-05	4.29614
AK7	AT	29201	2.2	NA	NA	0	0.993	0.9488	0.217	0.220918	0.307556	6.05964	8.46486e-07	4.39213e-05	4.29614
PAPOLA	AT	29202	9.4	NA	NA	0	1	0.3154	0.0507	-0.0858515	0.126414	-8.25847	1.68746e-09	2.8414e-07	10.5811
PAPOLA	AT	29203	21	NA	NA	0	1	0.4408	0.0606	0.0813242	0.845977	6.15665	6.37759e-07	3.46884e-05	4.58074
PAPOLA	RI	29208	9.2	9.1	9.3	0	1	0.8024	0.131	-0.151291	0.367609	-7.10717	4.12425e-08	3.63232e-06	7.34235
EVL	AP	29239	1	NA	NA	0	0.9965	0.9548	0.1403	0.118391	0.119117	3.96936	0.000372348	0.00579425	-1.75041
EVL	AP	29241	3	NA	NA	0	0.9965	0.9548	0.1519	-0.109303	0.843685	-3.64443	0.000921961	0.0116576	-2.63221
SLC25A29	AA	29256	3.2:3.3:3.4:3.5:3.6	2	3.7	0	0.9407	1	0.24	0.184454	0.190802	5.28053	1.34047e-05	0.000415743	1.69014
SLC25A29	ES	29259	3.2:3.3:3.4:3.5	2	3.7	0	0.9005	1	0.226	0.168354	0.126995	3.74271	0.00102714	0.0126764	-2.48444
WARS	AP	29272	2.1	NA	NA	0	0.9983	0.879	0.109	-0.122115	0.195958	-7.16528	3.4976e-08	3.16933e-06	7.509
WARS	AP	29273	1	NA	NA	0	0.9983	0.879	0.109	0.122115	0.804042	7.16528	3.4976e-08	3.16933e-06	7.509
PPP2R5C	AP	29313	1	NA	NA	0	1	0.7586	0.1265	-0.0807515	0.469285	-3.77852	0.000635894	0.00882421	-2.27186
PPP2R5C	AP	29314	5	NA	NA	0	1	0.7586	0.1265	0.0807515	0.530715	3.77852	0.000635894	0.00882421	-2.27186
PPP2R5C	AT	29317	20.2	NA	NA	0	1	0.595	0.1013	0.110127	0.250842	7.49329	1.38853e-08	1.52558e-06	8.4439
PPP2R5C	AT	29319	3	NA	NA	0	1	0.4582	0.0756	-0.0498545	0.280533	-3.4146	0.00172521	0.0186563	-3.23668
PPP2R5C	AT	29320	22	NA	NA	0	1	0.4494	0.0829	-0.0699879	0.376521	-4.88154	2.68229e-05	0.000728562	0.842126
WDR20	AT	29338	8	NA	NA	0	1	0.1892	0.0328	-0.0439818	0.0901242	-6.57584	1.88925e-07	1.25611e-05	5.80576
WDR20	AT	29340	7.3	NA	NA	0	1	0.5721	0.0851	0.116797	0.526895	9.18037	1.46674e-10	4.18573e-08	13.0641
WDR20	AT	29341	9	NA	NA	0	1	0.5582	0.0813	-0.0687	0.343647	-4.52347	7.61381e-05	0.00167051	-0.191059
TECPR2	AT	29415	20	NA	NA	0	1	0.5648	0.0789	-0.0556788	0.876409	-3.05297	0.00448428	0.0380521	-4.14831
TECPR2	AT	29416	17.2	NA	NA	0	1	0.5648	0.0789	0.0556758	0.123589	3.05276	0.00448677	0.0380521	-4.14884
MARK3	ES	29447	17	16	18	0	0.9267	1	0.1994	-0.207362	0.782566	-6.18035	1.02712e-06	5.18252e-05	4.23943
MARK3	ES	29448	17:18:00	16	19	0	1	0.7452	0.14	-0.260064	0.350411	-11.8351	2.39013e-13	1.84283e-10	19.6089
MARK3	ES	29450	17	16	19	0	1	0.7339	0.0982	-0.154003	0.220111	-8.34422	1.33837e-09	2.44061e-07	10.8164
KLC1	AT	29465	17	NA	NA	0	1	0.3451	0.062	0.0627606	0.176798	5.28642	8.17937e-06	0.000276726	2.02437
KLC1	AT	29467	19	NA	NA	0	1	0.8017	0.1339	-0.187082	0.644059	-8.56847	7.33218e-10	1.45151e-07	11.4277
KLC1	AT	29468	14.3	NA	NA	0	1	0.8633	0.1185	0.1243	0.179129	4.90925	2.4734e-05	0.000683713	0.922645
KLC1	AD	29487	13.3	13.2	18	0	0.9895	0.8515	0.1045	-0.0581	0.701975	-2.97964	0.00550694	0.0444072	-4.32153
KLC1	AA	29491	13.1	12	13.2	0	1	0.4029	0.0512	0.0464758	0.0598591	4.8709	2.76715e-05	0.000745443	0.811201
XRCC3	AP	29493	3.1	NA	NA	0	0.9459	0.9208	0.2288	-0.19301	0.620832	-3.338	0.00228643	0.0230944	-3.43772
XRCC3	AP	29494	1.1	NA	NA	0	0.9459	0.9208	0.2288	0.19301	0.379168	3.338	0.00228643	0.0230944	-3.43772
ZFYVE21	ES	29513	6.1	5	7	0	0.9965	0.5237	0.0687	0.0256938	0.04616	3.10546	0.00399017	0.0349114	-4.01627
C14orf2	ME	29528	3|4	2	5	0	0.9546	1	0.1589	0.133893	0.590517	3.00176	0.00577166	0.0460267	-4.24715
C14orf2	ES	29533	03:05:00	2	7.1	1	0.8482	0.9226	0.1731	0.203974	0.44094	4.84102	7.21432e-05	0.00160291	0.198063
C14orf2	ES	29536	3	2	5	0	1	0.1313	0.0098	0.00617576	0.0102879	4.05886	0.000289023	0.00472871	-1.50275
INF2	AT	29545	5.2	NA	NA	0	1	0.7365	0.1021	0.125055	0.116706	5.43756	5.24595e-06	0.000192284	2.46792
INF2	AT	29546	23	NA	NA	0	1	0.7365	0.1021	-0.125055	0.883294	-5.43756	5.24595e-06	0.000192284	2.46792
C14orf79	AD	29589	2.3:2.4	2.2	3.2	0	1	1	0.1648	0.154242	0.399967	4.63121	5.56825e-05	0.00130236	0.118196
C14orf79	ES	29590	2.4	2.2	3.2	0	0.8115	1	0.1647	0.183987	0.192425	5.16779	0.00010069	0.00206879	0.2604
BRF1	AT	29611	4.2	NA	NA	0	1	0.4389	0.0505	0.0505152	0.0700697	4.20188	0.000192285	0.00341437	-1.10331
BRF1	AT	29612	20.2	NA	NA	0	1	0.4389	0.0505	-0.0505182	0.929932	-4.2021	0.00019216	0.00341352	-1.10267
MTA1	ES	29645	18	17	20	0	0.9965	0.4592	0.0415	-0.0111909	0.991814	-3.04895	0.0045311	0.0383537	-4.15814
MTA1	ES	29647	4	3	5	0	0.993	0.6205	0.1183	-0.0785594	0.881865	-5.02215	1.91809e-05	0.000556777	1.20359
CRIP2	AP	29648	2	NA	NA	0	0.9965	0.2775	0.0255	0.0341303	0.963062	7.78493	6.16821e-09	8.04393e-07	9.26606
CRIP2	AP	29649	1	NA	NA	0	0.9965	0.2775	0.0255	-0.0341333	0.0369364	-7.7828	6.20458e-09	8.06742e-07	9.2601
C14orf80	ES	29661	9	8	10	0	0.9756	0.9332	0.1371	-0.146078	0.398597	-5.44936	5.56891e-06	0.0002021	2.43804
NIPA1	AP	29687	3	NA	NA	0	1	0.629	0.1286	0.0848333	0.239292	3.45667	0.00153986	0.0170851	-3.12738
NIPA1	AP	29688	2	NA	NA	0	1	0.7181	0.1291	-0.0656182	0.703945	-2.9181	0.00633214	0.0490975	-4.47402
MTMR10	AT	29786	17	NA	NA	0	1	0.2587	0.0301	0.0158879	0.0305621	3.16634	0.00333878	0.0306459	-3.86825
MTMR10	AT	29787	18.4	NA	NA	0	1	0.2587	0.0301	-0.0158879	0.969438	-3.16634	0.00333878	0.0306459	-3.86825
MTMR10	RI	29789	18.2	18.1	18.3	0	1	0.6932	0.1395	0.120848	0.586139	5.02367	1.76893e-05	0.000521752	1.25586
MTMR10	ES	29794	7	6	9	0	0.9005	0.4657	0.0848	-0.0433857	0.930902	-3.30362	0.00264511	0.0257298	-3.52676
EMC4	AD	29847	2.3	2.2	3.1	0	0.9965	0.1117	0.0195	-0.0171281	0.0445585	-4.89845	2.74239e-05	0.000740318	0.847915
MEIS2	AP	29905	1	NA	NA	0	0.9948	1	0.1373	0.158412	0.246673	6.6364	1.58642e-07	1.09451e-05	5.98192
MEIS2	AP	29907	4.1	NA	NA	0	0.9948	0.545	0.0944	-0.106845	0.153174	-4.17291	0.000208884	0.00365301	-1.18456
BMF	ES	29947	6.1:6.2	5.2	7	0	0.9965	0.3466	0.0578	-0.0463219	0.949352	-3.84207	0.000552229	0.00791306	-2.11074
BAHD1	AA	29982	7.1	6	7.2	0	0.9773	0.7776	0.1059	-0.104334	0.491931	-5.22425	1.06869e-05	0.000342822	1.78668
RAD51	ME	30020	4|5	3	6	0	0.9424	0.8734	0.1075	-0.116859	0.131744	-3.84081	0.000910568	0.0115725	-2.29072
GCHFR	AP	30029	1	NA	NA	0	0.9983	0.9836	0.1028	-0.0742813	0.894928	-3.29982	0.00240149	0.0238996	-3.53179
GCHFR	AP	30031	3.1	NA	NA	0	0.9983	1	0.1004	0.0688281	0.0879662	3.03025	0.00484069	0.0403143	-4.19957
DNAJC17	AA	30040	7.1	6	7.2	0	0.9895	0.2756	0.0452	0.0358656	0.0514385	4.79303	3.71724e-05	0.000947777	0.545783
SPINT1	AP	30054	1	NA	NA	0	0.993	0.6101	0.0868	0.0963818	0.818412	4.68298	4.78944e-05	0.00114829	0.267306
SPINT1	AP	30055	2.1	NA	NA	0	0.993	0.6101	0.0868	-0.0963788	0.181589	-4.68268	4.79351e-05	0.00114829	0.266466
TMEM87A	AP	30132	2	NA	NA	0	1	0.37	0.0594	-0.0563333	0.10477	-3.66999	0.000859199	0.0110571	-2.56392
TMEM87A	AP	30133	1	NA	NA	0	1	0.37	0.0594	0.0563333	0.89523	3.66999	0.000859199	0.0110571	-2.56392
GANC	AT	30140	15	NA	NA	0	1	0.2866	0.0424	-0.0586848	0.107179	-8.14949	2.26848e-09	3.59911e-07	10.2807
GANC	AT	30141	29	NA	NA	0	1	0.5883	0.1104	0.0914576	0.375598	3.88354	0.000474085	0.00697759	-1.98607
CAPN3	AP	30149	1	NA	NA	0	0.9843	0.973	0.1276	0.0949818	0.396655	3.54826	0.00120031	0.0142361	-2.88727
ZNF106	AP	30162	1	NA	NA	0	0.8168	0.7788	0.139	0.175189	0.745544	4.42541	0.000136491	0.00262115	-0.625199
ZNF106	AP	30163	4.1	NA	NA	0	0.8168	0.7788	0.139	-0.175189	0.254456	-4.42541	0.000136491	0.00262115	-0.625199
TTBK2	AT	30198	15	NA	NA	0	1	0.3171	0.0452	-0.0244848	0.973973	-3.07688	0.00421538	0.0364321	-4.08972
TTBK2	AT	30199	12.2	NA	NA	0	1	0.3171	0.0452	0.0244848	0.0260273	3.07688	0.00421538	0.0364321	-4.08972
CCNDBP1	RI	30218	10.2	10.1	10.3	0	0.9913	1	0.2186	0.210558	0.349961	5.2214	9.90078e-06	0.000320176	1.83386
CCNDBP1	ES	30220	10.1	9	10.3	0	1	0.5623	0.0731	-0.0783727	0.124135	-7.36815	1.9726e-08	2.01609e-06	8.08844
PPIP5K1	ES	30268	28	27	29	0	0.8953	0.8956	0.1807	0.200748	0.591221	3.56372	0.00152922	0.0169921	-2.90777
CASC4	ES	30336	10	9	11	0	1	0.6812	0.0954	-0.0588364	0.630518	-3.16578	0.00334366	0.0306779	-3.86964
C15orf48	RI	30426	1.2	1.1	1.3	0	0.993	0.5415	0.0679	-0.0588387	0.208655	-3.10409	0.00408646	0.0355135	-4.01671
BLOC1S6	AT	30430	9	NA	NA	0	1	0.774	0.1429	-0.117545	0.35457	-3.654	0.000897958	0.0114357	-2.60666
BLOC1S6	AT	30431	4.2	NA	NA	0	1	0.774	0.1429	0.117542	0.645432	3.65388	0.000898246	0.0114357	-2.60697
DUT	AP	30484	2.1	NA	NA	0	0.9895	0.8612	0.1565	-0.176141	0.796471	-6.73162	1.41009e-07	9.97919e-06	6.13517
DUT	AP	30485	3.1	NA	NA	0	0.9895	0.8612	0.1556	0.171466	0.191798	6.60091	2.04079e-07	1.33267e-05	5.76191
FBN1	AT	30497	2.2	NA	NA	0	1	0.2334	0.0257	-0.00957576	0.0309	-3.8087	0.00058457	0.00826598	-2.19003
FBN1	AT	30499	66	NA	NA	0	1	0.2334	0.0257	0.00957576	0.9691	3.8087	0.00058457	0.00826598	-2.19003
GALK2	AP	30516	1	NA	NA	0	0.9948	0.7507	0.136	-0.163633	0.751611	-7.25174	2.73863e-08	2.61079e-06	7.75642
GALK2	AP	30518	3.1	NA	NA	0	0.9948	0.678	0.1247	0.145476	0.234568	6.99163	5.72949e-08	4.74199e-06	7.01008
FGF7	AT	30550	2.2	NA	NA	0	1	0.6201	0.0536	0.0303333	0.0184818	2.99361	0.00522395	0.0427288	-4.29269
FGF7	AT	30551	4	NA	NA	0	1	0.6201	0.0536	-0.0303333	0.981518	-2.99361	0.00522395	0.0427288	-4.29269
GABPB1	AT	30572	10	NA	NA	0	1	0.4653	0.0753	-0.0461636	0.836097	-3.58093	0.0010977	0.0133154	-2.80096
GABPB1	AT	30573	9.2	NA	NA	0	1	0.4653	0.0753	0.0461606	0.163905	3.58073	0.00109829	0.0133188	-2.80148
GABPB1	ES	30578	2	1	3	0	0.9058	0.6387	0.1255	-0.080492	0.301337	-3.12005	0.00456806	0.0385997	-3.96733
GNB5	AT	30638	13	NA	NA	0	1	0.1579	0.0224	-0.0167364	0.982165	-4.72831	4.1967e-05	0.00104084	0.398152
GNB5	AT	30640	5.2	NA	NA	0	1	0.1579	0.0224	0.0167364	0.0178348	4.72831	4.1967e-05	0.00104084	0.398152
MYO5A	ES	30660	35	34	36	0	0.9005	0.8293	0.1788	-0.216848	0.483903	-6.90656	1.47087e-07	1.03427e-05	6.20629
ARPP19	AP	30670	5.1	NA	NA	0	0.7644	1	0.2188	-0.217048	0.624958	-3.20747	0.00396307	0.0347504	-3.76691
ARPP19	AP	30671	3	NA	NA	0	0.7644	1	0.2144	0.21963	0.363025	3.17296	0.00430164	0.0369249	-3.84612
ARPP19	ES	30683	2.3:2.4:2.5:2.6:4	2.2	5.2	0	0.8045	0.9869	0.2364	0.207853	0.409569	4.81272	0.000127435	0.00248912	-0.176534
ARPP19	AD	30688	2.3:2.4:2.5:2.6	2.2	5.2	0	1	0.442	0.0647	0.0423545	0.907714	3.60499	0.00102759	0.0126784	-2.73716
ARPP19	RI	30692	2.3:2.4	2.2	2.5	0	1	0.7354	0.136	0.088903	0.622021	3.11924	0.00377608	0.0335745	-3.98528
CCPG1	AP	30722	1	NA	NA	0	0.9913	0.7571	0.0942	-0.0892182	0.784497	-4.11331	0.000247574	0.00421874	-1.35117
CCPG1	AP	30723	2	NA	NA	0	0.9913	0.7571	0.0942	0.0892152	0.215505	4.11307	0.000247743	0.00421874	-1.35184
CCPG1	RI	30726	9.4	9.3	9.5	0	1	0.6039	0.1059	0.12143	0.6191	6.52649	2.17877e-07	1.40813e-05	5.66203
DYX1C1	AT	30735	11	NA	NA	0	1	0.629	0.1221	-0.106018	0.329661	-3.89475	0.000459392	0.00680693	-1.95538
ZNF280D	AP	30765	1	NA	NA	0	1	0.6821	0.0857	-0.0460394	0.802414	-2.94251	0.00595179	0.0470448	-4.41571
ZNF280D	AP	30767	7	NA	NA	0	1	0.6821	0.0858	0.0491909	0.196011	3.01819	0.00490474	0.0407551	-4.23311
ZNF280D	ES	30779	10.1:10.2	9.2	11	0	0.9773	0.3024	0.0512	0.0383828	0.952908	3.15426	0.00376266	0.0334966	-3.89053
ZNF280D	ES	30780	10.2	9.2	11	0	0.801	0.5748	0.096	0.0901722	0.884002	3.14243	0.00574116	0.045825	-3.93007
TCF12	ES	30789	18	17	19	0	0.9668	0.7598	0.1456	0.0584	0.0761091	4.4957	8.25179e-05	0.00177857	-0.270503
GCOM1	AT	30797	17.3	NA	NA	0	0.9564	0.1162	0.021	0.0113129	0.0198938	3.57099	0.00119802	0.0142352	-2.83861
GCOM1	AT	30798	14.2	NA	NA	0	0.9564	0.7002	0.1412	-0.133732	0.814381	-5.76732	2.48698e-06	0.000106321	3.27794
GCOM1	AT	30799	20	NA	NA	0	0.9564	0.6463	0.1243	0.122403	0.165711	5.87771	1.81839e-06	8.17959e-05	3.59258
RNF111	AA	30927	14.1	13	14.2	0	0.993	0.6519	0.1081	0.0788469	0.341697	4.91274	2.63149e-05	0.000717745	0.888954
RNF111	AA	30928	10.1	9	10.2	0	0.9599	0.7537	0.1048	-0.0756848	0.217745	-4.09912	0.000257782	0.00434325	-1.39075
ANXA2	ES	30957	2	1.1	4.2	0	1	0.4269	0.0544	0.0407242	0.118671	3.38341	0.00187631	0.0198508	-3.31733
NARG2	AT	30959	16	NA	NA	0	1	0.607	0.0809	-0.0755	0.88335	-4.86894	2.78302e-05	0.000746923	0.805525
NARG2	AT	30962	9.2	NA	NA	0	1	0.607	0.0809	0.0755	0.11665	4.86894	2.78302e-05	0.000746923	0.805525
[truncated: 3,879 more rows]

## Sheet: DEAS_MALE_LUSC
symbol	splice_type	as_id	exons	from_exon	to_exon	novel_splice	pct_with_values	psi_range	std_psi	logFC	AveExpr	t	P.Value	adj.P.Val	B
[truncated: 11,253 more rows]

[truncated: 1 more sheets: DEAS_FEMALE_LUSC]
