# Supplementary material for: Survival-associated alternative splicing signatures in non-small cell lung cancer
Source: Aging (Albany NY). 2020 Apr 13;12(7):5878–93. doi: 10.18632/aging.102983 (PMC7185095; doi:10.18632/aging.102983)
Supplement: Supplementary Table 4 [file aging-12-102983-s001..xlsx]

## Sheet: MALE_LUAD
ID	B	SE	瓦尔德	自由度	显著性	Exp(B)	下限	上限
AP〇PDE4D〇ID〇072135	1.83011	0.481109	14.47	1	0.000142407	6.2346	2.42822	16.0077
ES〇FAM21A〇ID〇011561	1.58762	0.418044	14.4229	1	0.000146017	4.89211	2.15604	11.1003
AT〇HNRNPLL〇ID〇053259	1.35681	0.41698	10.5878	1	0.00113837	3.88377	1.71522	8.79403
ES〇LMO7〇ID〇026067	1.13293	0.410102	7.63167	1	0.0057352	3.10473	1.38977	6.93591
AP〇UBE2E1〇ID〇063714	0.830356	0.382417	4.7147	1	0.0299058	2.29414	1.08419	4.85437
AP〇SSFA2〇ID〇056438	-0.963545	0.47493	4.11609	1	0.042477	0.381538	0.15041	0.967829
ES〇CA5B〇ID〇098313	-0.997803	0.407223	6.00379	1	0.0142752	0.368688	0.16597	0.819008
AP〇KIAA1217〇ID〇010995	-1.64166	0.450216	13.296	1	0.000265972	0.193659	0.0801333	0.468019

## Sheet: FEMALE_LUAD
ID	B	SE	瓦尔德	自由度	显著性	Exp(B)	下限	上限
AA〇PGBD2〇ID〇010573	1.25266	0.262527	22.7674	1	1.82837e-06	3.49963	2.09198	5.85444
AT〇RPGRIP1L〇ID〇036421	0.917862	0.267522	11.7716	1	0.000601424	2.50393	1.4822	4.22997
AD〇DAG1〇ID〇064888	0.913931	0.263316	12.0468	1	0.000518804	2.49411	1.48861	4.17879
AA〇ZDHHC8〇ID〇061144	0.72504	0.262331	7.63876	1	0.0057127	2.06481	1.23476	3.45285
ES〇NDRG2〇ID〇026512	0.710305	0.25857	7.54629	1	0.00601339	2.03461	1.22571	3.37735
AT〇NUPL2〇ID〇078961	0.641542	0.273336	5.5088	1	0.018921	1.89941	1.11161	3.24551
ES〇HPCAL1〇ID〇052659	0.616126	0.267982	5.28602	1	0.0214973	1.85174	1.09515	3.13103
AT〇EIF4E2〇ID〇058000	0.610215	0.255632	5.69815	1	0.0169828	1.84083	1.11537	3.03814

## Sheet: MALE_LUSC
ID	B	SE	瓦尔德	自由度	显著性	Exp(B)	下限	上限
AT〇PSPC1〇ID〇025403	0.682993	0.24232	7.94426	1	0.00482402	1.97979	1.23128	3.18334
RI〇CCDC88A〇ID〇053613	0.610375	0.226172	7.28307	1	0.00696075	1.84112	1.18185	2.86814
AT〇LARP6〇ID〇031442	0.599	0.249356	5.77051	1	0.0162973	1.8203	1.11658	2.96753
AD〇ARL6IP4〇ID〇025037	0.526982	0.245564	4.60534	1	0.0318725	1.69381	1.04674	2.74088
AP〇ABHD17A〇ID〇046553	-0.509232	0.247983	4.21685	1	0.0400243	0.600957	0.369624	0.977072
ES〇COX5A〇ID〇031812	-0.520431	0.233991	4.94683	1	0.0261385	0.594265	0.37567	0.940055
AP〇CEPT1〇ID〇004140	-0.590226	0.222024	7.06706	1	0.00785142	0.554202	0.358659	0.856357

## Sheet: FEMALE_LUSC
ID	B	SE	瓦尔德	自由度	显著性	Exp(B)	下限	上限
ES〇FAM131A〇ID〇067936	1.9526	0.495259	15.5439	1	8.06104e-05	7.04698	2.66955	18.6024
ES〇KIFC3〇ID〇036608	1.66847	0.44855	13.8361	1	0.000199468	5.30403	2.20191	12.7765
ES〇KIF13A〇ID〇075458	-1.02898	0.466146	4.87268	1	0.027285	0.357372	0.14333	0.891055
RI〇RPL29〇ID〇065167	-1.16055	0.473912	5.99695	1	0.0143307	0.313315	0.123762	0.793187
AT〇LAMP2〇ID〇089999	-1.39573	0.45749	9.30766	1	0.00228198	0.247652	0.101024	0.607096
AP〇MAZ〇ID〇035938	-1.62176	0.488258	11.0326	1	0.000895251	0.19755	0.0758703	0.514379
AP〇ZBTB7B〇ID〇007876	-2.19771	0.544874	16.2685	1	5.497e-05	0.111058	0.0381726	0.323106
