# Supplementary material for: Survival-associated alternative splicing signatures in non-small cell lung cancer
Source: Aging (Albany NY). 2020 Apr 13;12(7):5878–93. doi: 10.18632/aging.102983 (PMC7185095; doi:10.18632/aging.102983)
Supplement: Supplementary Table 5 [file aging-12-102983-s004..xlsx]

## Sheet: MALE_LUAD
ID	HR	95% CI	HR.confint.lower	HR.confint.upper	p.value
AT〇SEPT8〇ID〇073299	1.6	(1-2.5)	1	2.5	0.034
AP〇PPP2R4〇ID〇087831	0.57	(0.37-0.88)	0.37	0.88	0.012
AT〇FAM72A〇ID〇009578	2	(1.3-3)	1.3	3	0.0025
ES〇FN1〇ID〇057395	2.1	(1.3-3.2)	1.3	3.2	0.00099
AT〇FAM72A〇ID〇009577	0.61	(0.39-0.93)	0.39	0.93	0.023
AP〇FAM72A〇ID〇009575	0.5	(0.32-0.77)	0.32	0.77	0.0019
AP〇FAM72A〇ID〇009576	2	(1.3-3.1)	1.3	3.1	0.0018
AT〇SLC35A2〇ID〇089035	0.63	(0.4-0.97)	0.4	0.97	0.037
AP〇LDB1〇ID〇012934	2.1	(1.3-3.2)	1.3	3.2	0.0014
AP〇LDB1〇ID〇012935	0.46	(0.3-0.72)	0.3	0.72	0.00068
AP〇LIMK1〇ID〇080060	0.63	(0.41-0.99)	0.41	0.99	0.044
AP〇LIMK1〇ID〇080059	1.6	(1-2.5)	1	2.5	0.035
AP〇SLC3A2〇ID〇016462	1.6	(1-2.4)	1	2.4	0.039
ES〇VEGFA〇ID〇076328	0.6	(0.39-0.93)	0.39	0.93	0.021
AP〇SLC19A1〇ID〇060878	1.8	(1.2-2.9)	1.2	2.9	0.0095
AT〇NEIL3〇ID〇071227	1.9	(1.2-2.9)	1.2	2.9	0.0051
AT〇NEIL3〇ID〇071226	0.55	(0.36-0.86)	0.36	0.86	0.0087
AT〇NEK2〇ID〇009718	0.61	(0.4-0.95)	0.4	0.95	0.028
AT〇NEK2〇ID〇009717	1.7	(1.1-2.6)	1.1	2.6	0.022
AP〇ACOT7〇ID〇000390	0.62	(0.4-0.95)	0.4	0.95	0.03
ES〇AP2B1〇ID〇040319	0.54	(0.35-0.84)	0.35	0.84	0.0058
AT〇INADL〇ID〇003237	1.7	(1.1-2.7)	1.1	2.7	0.012
AP〇DGKZ〇ID〇015540	1.7	(1.1-2.6)	1.1	2.6	0.019
AD〇TMEM106C〇ID〇021391	1.8	(1.2-2.8)	1.2	2.8	0.0083
AP〇DGKZ〇ID〇015541	0.62	(0.4-0.95)	0.4	0.95	0.03
ES〇LMO7〇ID〇026067	1.7	(1.1-2.6)	1.1	2.6	0.021
ES〇COL6A3〇ID〇058104	1.6	(1-2.5)	1	2.5	0.033
ES〇SVIL〇ID〇011114	0.43	(0.27-0.69)	0.27	0.69	0.00046
AT〇TMPO〇ID〇023845	1.7	(1.1-2.6)	1.1	2.6	0.021
AP〇CHRNB1〇ID〇038958	0.59	(0.38-0.91)	0.38	0.91	0.018
AT〇INADL〇ID〇003239	0.54	(0.35-0.83)	0.35	0.83	0.0054
ES〇ITGB4〇ID〇043489	0.54	(0.35-0.84)	0.35	0.84	0.0059
AT〇ZNF738〇ID〇048763	1.6	(1-2.5)	1	2.5	0.031
AP〇MXI1〇ID〇013080	1.6	(1-2.4)	1	2.4	0.036
AP〇PRKAR1B〇ID〇078509	0.52	(0.33-0.83)	0.33	0.83	0.0059
AP〇GGT1〇ID〇061426	0.6	(0.38-0.93)	0.38	0.93	0.022
AT〇GLIPR1L2〇ID〇023461	0.54	(0.35-0.84)	0.35	0.84	0.0059
AT〇GLIPR1L2〇ID〇023458	1.8	(1.1-2.7)	1.1	2.7	0.01
ES〇SERPINH1〇ID〇017871	0.52	(0.33-0.8)	0.33	0.8	0.0031
AP〇CASKIN2〇ID〇043450	1.9	(1.2-3)	1.2	3	0.0069
AP〇CASKIN2〇ID〇043451	0.54	(0.34-0.85)	0.34	0.85	0.0078
AT〇KIF4A〇ID〇089372	0.55	(0.35-0.85)	0.35	0.85	0.0073
AT〇KIF4A〇ID〇089373	1.7	(1.1-2.7)	1.1	2.7	0.013
AP〇LAMA3〇ID〇044844	0.55	(0.35-0.87)	0.35	0.87	0.01
AP〇LAMA3〇ID〇044845	1.8	(1.2-2.9)	1.2	2.9	0.01
AP〇FAXDC2〇ID〇074223	0.6	(0.38-0.93)	0.38	0.93	0.024
AA〇PCNP〇ID〇065963	1.6	(1-2.4)	1	2.4	0.044
AP〇GALK2〇ID〇030518	1.6	(1-2.4)	1	2.4	0.046
ES〇EFEMP1〇ID〇053639	0.57	(0.37-0.88)	0.37	0.88	0.011
ES〇MEGF6〇ID〇000315	0.61	(0.39-0.95)	0.39	0.95	0.029
AP〇SEPT9〇ID〇043715	0.5	(0.32-0.77)	0.32	0.77	0.0017
AP〇GALK2〇ID〇030516	0.6	(0.39-0.93)	0.39	0.93	0.021
AP〇CDC14B〇ID〇086972	0.6	(0.37-0.98)	0.37	0.98	0.043
AP〇CDC14B〇ID〇086971	1.7	(1-2.8)	1	2.8	0.035
AP〇KIAA1217〇ID〇010995	0.35	(0.22-0.55)	0.22	0.55	5.3e-06
AP〇GUK1〇ID〇010180	0.59	(0.38-0.92)	0.38	0.92	0.02
AD〇TCEAL4〇ID〇089756	0.52	(0.34-0.81)	0.34	0.81	0.0039
AP〇FKBP8〇ID〇048444	0.6	(0.39-0.92)	0.39	0.92	0.021
AP〇FKBP8〇ID〇048445	1.6	(1-2.5)	1	2.5	0.031
ES〇SLMAP〇ID〇065397	1.8	(1.2-2.8)	1.2	2.8	0.0083
AP〇EIF5A〇ID〇038906	0.59	(0.38-0.92)	0.38	0.92	0.019
ES〇KCTD20〇ID〇075982	1.7	(1.1-2.5)	1.1	2.5	0.023
ES〇MRPL33〇ID〇053046	2.6	(1.6-4.1)	1.6	4.1	4.4e-05
AP〇ARHGEF39〇ID〇086269	1.8	(1.1-2.8)	1.1	2.8	0.0099
AP〇ARHGEF39〇ID〇086268	0.6	(0.39-0.92)	0.39	0.92	0.02
AP〇UGDH〇ID〇069064	0.56	(0.36-0.88)	0.36	0.88	0.011
AP〇UBE2E1〇ID〇063714	1.6	(1-2.5)	1	2.5	0.038
AP〇UBE2E1〇ID〇063715	0.63	(0.4-0.97)	0.4	0.97	0.038
AT〇CLSPN〇ID〇001730	1.7	(1.1-2.6)	1.1	2.6	0.023
AT〇CLSPN〇ID〇001731	0.61	(0.39-0.94)	0.39	0.94	0.025
AP〇EIF5A〇ID〇038908	1.6	(1-2.5)	1	2.5	0.031
RI〇SNX5〇ID〇058751	0.55	(0.35-0.85)	0.35	0.85	0.0069
AP〇DYNC1I2〇ID〇055938	1.6	(1-2.5)	1	2.5	0.035
AP〇DYNC1I2〇ID〇055939	0.63	(0.41-0.97)	0.41	0.97	0.037
ES〇PTP4A3〇ID〇085338	0.56	(0.37-0.87)	0.37	0.87	0.01
AT〇CENPK〇ID〇072213	0.57	(0.37-0.88)	0.37	0.88	0.012
AT〇CENPK〇ID〇072212	1.8	(1.1-2.7)	1.1	2.7	0.011
ES〇PUF60〇ID〇085504	0.62	(0.41-0.96)	0.41	0.96	0.032
AP〇SYNJ2〇ID〇078244	1.6	(1-2.4)	1	2.4	0.042
ES〇DNAJC19〇ID〇067760	1.8	(1.2-2.8)	1.2	2.8	0.0077
AP〇PTPN6〇ID〇020022	1.7	(1.1-2.6)	1.1	2.6	0.023
AP〇PTPN6〇ID〇020023	0.6	(0.39-0.93)	0.39	0.93	0.023
AT〇BRIP1〇ID〇042893	1.6	(1-2.4)	1	2.4	0.037
AP〇ZNF185〇ID〇090395	0.5	(0.31-0.81)	0.31	0.81	0.0043
AT〇BCAM〇ID〇050346	0.5	(0.32-0.78)	0.32	0.78	0.0022
AT〇BCAM〇ID〇050347	2	(1.3-3.1)	1.3	3.1	0.0022
AT〇IPO11〇ID〇072190	0.58	(0.37-0.9)	0.37	0.9	0.016
AT〇IPO11〇ID〇072191	1.7	(1.1-2.7)	1.1	2.7	0.013
ES〇SLK〇ID〇013030	1.7	(1.1-2.6)	1.1	2.6	0.023
AT〇EPB41L5〇ID〇055146	0.65	(0.42-1)	0.42	1	0.049
AT〇SERPINB5〇ID〇045716	1.7	(1.1-2.7)	1.1	2.7	0.014
AT〇SERPINB5〇ID〇045717	0.58	(0.38-0.9)	0.38	0.9	0.015
AP〇GALNT6〇ID〇021847	0.62	(0.38-0.99)	0.38	0.99	0.043
AP〇TTC7A〇ID〇053483	0.59	(0.38-0.91)	0.38	0.91	0.018
AP〇TTC7A〇ID〇053482	1.6	(1.1-2.5)	1.1	2.5	0.028
AT〇CROT〇ID〇080323	1.6	(1.1-2.5)	1.1	2.5	0.027
AP〇CLASP2〇ID〇063869	0.52	(0.33-0.82)	0.33	0.82	0.0051
AT〇HS2ST1〇ID〇003691	1.6	(1.1-2.5)	1.1	2.5	0.026
AP〇PTCD1〇ID〇080625	1.6	(1-2.4)	1	2.4	0.044
AP〇PTCD1〇ID〇080624	0.64	(0.41-0.99)	0.41	0.99	0.044
ES〇SBDS〇ID〇079907	0.51	(0.32-0.8)	0.32	0.8	0.0031
AP〇RCAN2〇ID〇076413	0.58	(0.37-0.92)	0.37	0.92	0.022
ES〇LZTFL1〇ID〇064417	1.8	(1.1-2.7)	1.1	2.7	0.012
AT〇RBM4B〇ID〇017108	0.52	(0.34-0.82)	0.34	0.82	0.0042
AT〇RBM4B〇ID〇017107	1.9	(1.2-3)	1.2	3	0.004
AP〇TMEM164〇ID〇089871	1.8	(1.1-3)	1.1	3	0.012
AP〇TMEM164〇ID〇089872	0.53	(0.33-0.86)	0.33	0.86	0.01
ES〇SEC31A〇ID〇069733	1.7	(1.1-2.6)	1.1	2.6	0.021
ES〇TNC〇ID〇087351	1.6	(1-2.5)	1	2.5	0.037
AT〇CDCP1〇ID〇064398	0.6	(0.39-0.92)	0.39	0.92	0.019
AT〇CDCP1〇ID〇064397	1.7	(1.1-2.6)	1.1	2.6	0.016
AP〇MAPRE2〇ID〇045135	0.59	(0.38-0.91)	0.38	0.91	0.018
ES〇MTIF2〇ID〇053607	0.62	(0.4-0.96)	0.4	0.96	0.03
AP〇ZNF185〇ID〇090396	2	(1.3-3.3)	1.3	3.3	0.0031
AD〇RPS14〇ID〇074095	1.6	(1-2.4)	1	2.4	0.046
AP〇RNH1〇ID〇013662	1.6	(1-2.5)	1	2.5	0.035
AP〇SH3KBP1〇ID〇088643	1.7	(1.1-2.7)	1.1	2.7	0.015
AT〇TMEM161B〇ID〇072731	0.48	(0.31-0.75)	0.31	0.75	0.0013
AT〇TMEM161B〇ID〇072730	2	(1.3-3.1)	1.3	3.1	0.0021
AT〇CROT〇ID〇080322	0.58	(0.38-0.9)	0.38	0.9	0.015
RI〇MED16〇ID〇046333	1.7	(1.1-2.7)	1.1	2.7	0.014
AP〇CRYAB〇ID〇018693	0.5	(0.32-0.78)	0.32	0.78	0.0021
AT〇PTGER3〇ID〇003415	0.63	(0.41-0.97)	0.41	0.97	0.038
AT〇GINS4〇ID〇083516	0.64	(0.42-0.99)	0.42	0.99	0.043
AP〇RCC1〇ID〇001387	1.8	(1.1-2.8)	1.1	2.8	0.011
AP〇RCC1〇ID〇001386	0.57	(0.37-0.89)	0.37	0.89	0.013
AP〇FADS1〇ID〇016298	0.62	(0.4-0.95)	0.4	0.95	0.03
AP〇FAM222B〇ID〇039980	0.63	(0.41-0.97)	0.41	0.97	0.035
AT〇FBXL22〇ID〇031065	1.7	(1.1-2.6)	1.1	2.6	0.018
AT〇FBXL22〇ID〇031066	0.59	(0.38-0.91)	0.38	0.91	0.018
ES〇FNBP1〇ID〇087879	1.8	(1.1-2.8)	1.1	2.8	0.019
ES〇ZNF189〇ID〇087092	0.62	(0.39-0.97)	0.39	0.97	0.038
AP〇RANBP1〇ID〇061137	1.6	(1.1-2.5)	1.1	2.5	0.026
AP〇RANBP1〇ID〇061136	0.64	(0.42-0.99)	0.42	0.99	0.047
ES〇FBXO4〇ID〇071888	1.6	(1.1-2.5)	1.1	2.5	0.024
AP〇CENPM〇ID〇062467	1.9	(1.2-3)	1.2	3	0.0065
AT〇HS2ST1〇ID〇003692	0.6	(0.39-0.92)	0.39	0.92	0.02
AP〇ANAPC11〇ID〇044202	1.7	(1.1-2.7)	1.1	2.7	0.012
ES〇RRBP1〇ID〇058743	0.62	(0.4-0.95)	0.4	0.95	0.03
AT〇SPATA24〇ID〇073605	1.7	(1.1-2.6)	1.1	2.6	0.02
AT〇SPATA24〇ID〇073604	0.6	(0.39-0.94)	0.39	0.94	0.025
AT〇ZNF66〇ID〇048728	0.57	(0.37-0.88)	0.37	0.88	0.012
AT〇TNFRSF10C〇ID〇083064	0.62	(0.4-0.96)	0.4	0.96	0.033
AT〇TNFRSF10C〇ID〇083065	1.5	(1-2.4)	1	2.4	0.048
AP〇FAM222B〇ID〇039979	1.6	(1-2.5)	1	2.5	0.035
AP〇FTO〇ID〇036426	0.54	(0.32-0.89)	0.32	0.89	0.016
ES〇WIPI2〇ID〇078656	1.9	(1.2-2.9)	1.2	2.9	0.0047
ES〇MYL12A〇ID〇044491	1.7	(1.1-2.6)	1.1	2.6	0.023
AT〇HNRNPLL〇ID〇053259	2	(1.3-3.1)	1.3	3.1	0.0024
AP〇RNH1〇ID〇013664	0.65	(0.42-1)	0.42	1	0.048
AP〇ADAR〇ID〇007838	0.61	(0.4-0.95)	0.4	0.95	0.027
AP〇ADAR〇ID〇007837	1.6	(1.1-2.5)	1.1	2.5	0.027
ES〇ADAM15〇ID〇007897	0.64	(0.41-0.99)	0.41	0.99	0.044
ES〇C11orf49〇ID〇015635	0.56	(0.36-0.86)	0.36	0.86	0.0091
AA〇KANSL3〇ID〇054567	1.7	(1.1-2.7)	1.1	2.7	0.026
AT〇FAN1〇ID〇029777	0.6	(0.39-0.93)	0.39	0.93	0.023
AT〇FAN1〇ID〇029778	1.7	(1.1-2.6)	1.1	2.6	0.022
AP〇TGFBR3〇ID〇003742	0.58	(0.37-0.91)	0.37	0.91	0.018
ES〇SLC3A2〇ID〇016473	0.58	(0.36-0.92)	0.36	0.92	0.021
AP〇CENPM〇ID〇062466	0.59	(0.38-0.92)	0.38	0.92	0.019
AT〇C18orf56〇ID〇044456	2.7	(1.7-4.3)	1.7	4.3	4.1e-05
AT〇C18orf56〇ID〇044455	0.37	(0.23-0.6)	0.23	0.6	4.1e-05
AT〇CAMTA1〇ID〇000501	0.6	(0.39-0.93)	0.39	0.93	0.023
AT〇ATG16L2〇ID〇017650	1.6	(1-2.4)	1	2.4	0.046
AP〇SLCO1A2〇ID〇020676	2.9	(1.4-6)	1.4	6	0.0044
AP〇MAPRE2〇ID〇045133	1.9	(1.2-3)	1.2	3	0.0046
AP〇GALNT4〇ID〇023641	0.52	(0.34-0.81)	0.34	0.81	0.0038
AP〇GALNT4〇ID〇023640	2	(1.3-3.1)	1.3	3.1	0.002
ES〇IFT172〇ID〇095454	0.59	(0.37-0.94)	0.37	0.94	0.026
AP〇RAMP1〇ID〇058149	0.58	(0.37-0.89)	0.37	0.89	0.013
AP〇PPP1R12B〇ID〇009411	0.61	(0.38-0.97)	0.38	0.97	0.038
AA〇TMEM125〇ID〇002153	2.5	(1.6-3.9)	1.6	3.9	9.8e-05
AP〇PLEC〇ID〇085511	0.52	(0.33-0.81)	0.33	0.81	0.0036
ES〇SDHA〇ID〇071419	0.61	(0.39-0.93)	0.39	0.93	0.024
ES〇BMP1〇ID〇082988	0.51	(0.32-0.81)	0.32	0.81	0.0045
AD〇FAM115A〇ID〇082126	1.7	(1.1-2.6)	1.1	2.6	0.022
ES〇RFFL〇ID〇040233	0.61	(0.39-0.94)	0.39	0.94	0.024
AP〇TCEB1〇ID〇084196	0.64	(0.41-0.99)	0.41	0.99	0.047
AP〇TCEB1〇ID〇084198	1.6	(1-2.4)	1	2.4	0.047
AP〇PDE4D〇ID〇072135	2	(1.3-3.2)	1.3	3.2	0.0017
AP〇NAP1L1〇ID〇023468	2.5	(1.6-3.8)	1.6	3.8	8e-05
AP〇NAP1L1〇ID〇023467	0.4	(0.25-0.62)	0.25	0.62	6e-05
RI〇RUSC1〇ID〇008080	0.64	(0.41-0.99)	0.41	0.99	0.044
ES〇GPR137〇ID〇016623	0.59	(0.38-0.91)	0.38	0.91	0.017
ES〇ODF3B〇ID〇062862	1.6	(1-2.5)	1	2.5	0.046
ES〇ADAM15〇ID〇007898	0.55	(0.35-0.85)	0.35	0.85	0.007
AP〇PDE5A〇ID〇070465	1.8	(1.1-2.9)	1.1	2.9	0.022
AT〇ZDHHC11〇ID〇071450	0.55	(0.35-0.87)	0.35	0.87	0.01
AP〇RGS3〇ID〇087287	1.6	(1.1-2.5)	1.1	2.5	0.026
AA〇USP39〇ID〇054320	0.56	(0.36-0.86)	0.36	0.86	0.0086
AP〇FAXDC2〇ID〇074222	1.7	(1.1-2.7)	1.1	2.7	0.018
AA〇YME1L1〇ID〇011061	0.58	(0.37-0.89)	0.37	0.89	0.014
AP〇MDFI〇ID〇076116	2.1	(1.3-3.4)	1.3	3.4	0.0021
AP〇MDFI〇ID〇076115	0.46	(0.28-0.74)	0.28	0.74	0.0015
RI〇EPHB2〇ID〇001026	0.62	(0.4-0.96)	0.4	0.96	0.033
AP〇RAMP1〇ID〇058148	1.7	(1.1-2.6)	1.1	2.6	0.018
AP〇ARHGEF3〇ID〇065360	0.49	(0.31-0.77)	0.31	0.77	0.002
ES〇CA5B〇ID〇098313	0.49	(0.31-0.78)	0.31	0.78	0.0026
AT〇CPAMD8〇ID〇048218	0.53	(0.34-0.84)	0.34	0.84	0.006
AT〇CPAMD8〇ID〇048219	1.7	(1.1-2.6)	1.1	2.6	0.018
AT〇ZSCAN9〇ID〇075721	1.6	(1.1-2.5)	1.1	2.5	0.027
AP〇MAGED2〇ID〇089247	0.56	(0.36-0.86)	0.36	0.86	0.0089
AT〇GRIK2〇ID〇077097	0.63	(0.41-0.97)	0.41	0.97	0.036
AT〇GRIK2〇ID〇077096	1.6	(1-2.5)	1	2.5	0.03
ES〇RAB2A〇ID〇083946	0.62	(0.4-0.96)	0.4	0.96	0.033
ES〇BLOC1S6〇ID〇030456	1.7	(1.1-2.6)	1.1	2.6	0.023
RI〇EIF3C〇ID〇035830	1.7	(1.1-2.6)	1.1	2.6	0.017
AP〇NIPA1〇ID〇029687	1.6	(1-2.4)	1	2.4	0.045
ES〇PLEKHM1〇ID〇041977	1.6	(1-2.5)	1	2.5	0.035
AT〇NEK11〇ID〇066783	0.57	(0.37-0.88)	0.37	0.88	0.011
AP〇ZNF219〇ID〇026527	1.8	(1.1-3)	1.1	3	0.019
AT〇UROS〇ID〇013430	1.7	(1.1-2.7)	1.1	2.7	0.014
AD〇PQBP1〇ID〇089028	0.58	(0.37-0.9)	0.37	0.9	0.015
ES〇SERPINA1〇ID〇029125	1.7	(1.1-2.6)	1.1	2.6	0.027
AP〇PTK2〇ID〇085295	0.59	(0.38-0.91)	0.38	0.91	0.018
ES〇SEPHS1〇ID〇010796	1.7	(1.1-2.6)	1.1	2.6	0.016
AP〇FDFT1〇ID〇082638	0.61	(0.39-0.94)	0.39	0.94	0.025
ES〇HN1L〇ID〇033123	1.8	(1.2-2.8)	1.2	2.8	0.0081
ES〇LMO7〇ID〇026066	1.6	(1-2.4)	1	2.4	0.043
ES〇PHLDB2〇ID〇066067	0.59	(0.38-0.92)	0.38	0.92	0.021
AD〇PCMT1〇ID〇078109	0.61	(0.39-0.94)	0.39	0.94	0.024
AA〇TMX2〇ID〇015923	0.61	(0.39-0.94)	0.39	0.94	0.024
AT〇TRIM73〇ID〇080116	0.64	(0.42-0.99)	0.42	0.99	0.047
ES〇POLL〇ID〇012889	0.63	(0.41-0.98)	0.41	0.98	0.039
AP〇RUSC1〇ID〇008077	0.63	(0.41-0.97)	0.41	0.97	0.037
AP〇RUSC1〇ID〇008078	1.6	(1-2.4)	1	2.4	0.037
AA〇BMP1〇ID〇082995	0.57	(0.36-0.92)	0.36	0.92	0.021
AT〇INF2〇ID〇029546	1.7	(1.1-2.6)	1.1	2.6	0.02
AT〇INF2〇ID〇029545	0.57	(0.37-0.89)	0.37	0.89	0.013
ES〇LMO7〇ID〇026068	0.65	(0.42-1)	0.42	1	0.049
ES〇BOLA3〇ID〇054017	1.7	(1.1-2.6)	1.1	2.6	0.015
AP〇GGT1〇ID〇061431	1.7	(1.1-2.6)	1.1	2.6	0.018
ES〇UGP2〇ID〇053757	0.52	(0.34-0.81)	0.34	0.81	0.0038
AT〇C3orf55〇ID〇067409	1.6	(1-2.5)	1	2.5	0.039
RI〇NUTM2E〇ID〇012332	1.8	(1.1-2.8)	1.1	2.8	0.014
RI〇MRFAP1〇ID〇068723	0.58	(0.37-0.9)	0.37	0.9	0.014
AP〇PPP2R5C〇ID〇029313	0.64	(0.41-0.98)	0.41	0.98	0.04
AP〇PPP2R5C〇ID〇029314	1.6	(1.1-2.5)	1.1	2.5	0.025
AD〇SH2B1〇ID〇035871	1.6	(1-2.5)	1	2.5	0.037
AP〇AMPD3〇ID〇014345	1.7	(1-2.6)	1	2.6	0.031
ES〇FN1〇ID〇057396	1.8	(1.1-2.7)	1.1	2.7	0.01
AT〇FEZ1〇ID〇019295	0.63	(0.41-0.98)	0.41	0.98	0.038
AT〇FEZ1〇ID〇019294	1.6	(1-2.4)	1	2.4	0.038
AP〇TADA3〇ID〇063176	0.63	(0.41-0.96)	0.41	0.96	0.034
AP〇TADA3〇ID〇063177	1.6	(1.1-2.5)	1.1	2.5	0.027
AP〇ALG3〇ID〇067851	0.65	(0.42-0.99)	0.42	0.99	0.047
ES〇FAM21A〇ID〇011559	2	(1.3-3.1)	1.3	3.1	0.0021
AD〇C7orf49〇ID〇081872	0.61	(0.39-0.94)	0.39	0.94	0.026
ES〇TMX2〇ID〇015920	0.55	(0.36-0.86)	0.36	0.86	0.0082
AP〇NCOA6〇ID〇059034	1.9	(1.2-3)	1.2	3	0.0034
AP〇NCOA6〇ID〇059035	0.53	(0.34-0.82)	0.34	0.82	0.0048
ES〇RNF167〇ID〇038607	0.6	(0.39-0.93)	0.39	0.93	0.023
ES〇IP6K2〇ID〇064760	2	(1.3-3.2)	1.3	3.2	0.0024
AP〇TFAP2C〇ID〇059883	2	(1.3-3.1)	1.3	3.1	0.0029
AP〇TFAP2C〇ID〇059884	0.52	(0.33-0.82)	0.33	0.82	0.0052
ES〇PABPC4〇ID〇001893	1.7	(1.1-2.6)	1.1	2.6	0.015
AP〇SSFA2〇ID〇056438	0.6	(0.39-0.93)	0.39	0.93	0.022
AP〇CYB561〇ID〇042925	0.64	(0.41-0.98)	0.41	0.98	0.04
AP〇PCED1A〇ID〇058557	0.53	(0.34-0.82)	0.34	0.82	0.0047
AP〇PCED1A〇ID〇058556	1.9	(1.2-2.9)	1.2	2.9	0.0047
ES〇CCNL2〇ID〇000161	0.6	(0.38-0.94)	0.38	0.94	0.024
AP〇CABIN1〇ID〇061387	1.6	(1.1-2.5)	1.1	2.5	0.029
AP〇ZNF558〇ID〇047261	1.8	(1.1-2.9)	1.1	2.9	0.011
RI〇PHF6〇ID〇090149	0.6	(0.38-0.93)	0.38	0.93	0.024
AP〇CMC2〇ID〇037703	1.8	(1.2-2.8)	1.2	2.8	0.0064
ES〇MTMR10〇ID〇029794	1.6	(1-2.5)	1	2.5	0.044
ES〇RBM4〇ID〇017096	2	(1.3-3.1)	1.3	3.1	0.0023
ES〇NSUN5〇ID〇097503	2	(1.3-3.1)	1.3	3.1	0.0024
ES〇MEGF8〇ID〇050158	0.49	(0.31-0.78)	0.31	0.78	0.0025
AP〇PPM1M〇ID〇065191	0.55	(0.35-0.86)	0.35	0.86	0.0086
AP〇PPM1M〇ID〇065190	1.8	(1.2-2.8)	1.2	2.8	0.0086
ES〇CLDND1〇ID〇065783	1.7	(1.1-2.7)	1.1	2.7	0.015
AP〇TMCO1〇ID〇008805	0.64	(0.42-0.99)	0.42	0.99	0.044
AP〇TMCO1〇ID〇008806	1.6	(1.1-2.5)	1.1	2.5	0.027
AP〇QSER1〇ID〇014864	1.7	(1.1-2.6)	1.1	2.6	0.021
AP〇SOCS2〇ID〇023705	0.62	(0.4-0.96)	0.4	0.96	0.033
AT〇ATP5S〇ID〇027466	1.7	(1.1-2.6)	1.1	2.6	0.015
ES〇NME1_NME2〇ID〇042513	1.6	(1.1-2.5)	1.1	2.5	0.029
ES〇DNAH14〇ID〇009984	0.65	(0.42-0.99)	0.42	0.99	0.047
AT〇NEK11〇ID〇066782	1.6	(1-2.5)	1	2.5	0.03
ES〇CNIH1〇ID〇027582	1.7	(1.1-2.7)	1.1	2.7	0.013
AP〇PRKAG2〇ID〇082385	0.55	(0.35-0.85)	0.35	0.85	0.0067
AD〇PSMD10〇ID〇089845	0.64	(0.41-0.98)	0.41	0.98	0.042
AT〇SGOL1〇ID〇063696	0.58	(0.37-0.89)	0.37	0.89	0.013
AT〇SGOL1〇ID〇063698	1.7	(1.1-2.6)	1.1	2.6	0.024
ES〇FAM21A〇ID〇011561	2.2	(1.4-3.5)	1.4	3.5	0.00048

## Sheet: FEMALE_LUAD
ID	HR	95% CI	HR.confint.lower	HR.confint.upper	p.value
ES〇SCEL〇ID〇026087	1.6	(1-2.4)	1	2.4	0.043
AP〇ISLR〇ID〇031676	1.7	(1.1-2.5)	1.1	2.5	0.014
AP〇ISLR〇ID〇031677	0.59	(0.39-0.9)	0.39	0.9	0.014
ES〇MYO6〇ID〇076802	0.61	(0.4-0.93)	0.4	0.93	0.023
AT〇FAM72A〇ID〇009578	1.8	(1.2-2.7)	1.2	2.7	0.0081
AT〇FAM72A〇ID〇009577	0.55	(0.36-0.85)	0.36	0.85	0.0065
ES〇POSTN〇ID〇025671	0.54	(0.35-0.81)	0.35	0.81	0.0034
AP〇MDK〇ID〇015566	1.6	(1.1-2.4)	1.1	2.4	0.028
AP〇MDK〇ID〇015567	0.6	(0.4-0.92)	0.4	0.92	0.018
AT〇BTNL9〇ID〇075037	0.65	(0.43-0.99)	0.43	0.99	0.043
AT〇SLC44A1〇ID〇087112	0.64	(0.42-0.96)	0.42	0.96	0.032
AT〇SLC44A1〇ID〇087113	1.6	(1-2.4)	1	2.4	0.032
AP〇PPP2R4〇ID〇087831	0.65	(0.43-0.98)	0.43	0.98	0.038
AT〇BTNL9〇ID〇075035	1.6	(1-2.4)	1	2.4	0.032
AA〇PSMF1〇ID〇058475	2.4	(1.6-3.7)	1.6	3.7	8e-05
ES〇COL6A3〇ID〇058104	1.8	(1.2-2.8)	1.2	2.8	0.0062
ES〇FN1〇ID〇057398	1.8	(1.2-2.7)	1.2	2.7	0.0067
AP〇FAM72A〇ID〇009575	0.63	(0.41-0.95)	0.41	0.95	0.026
AP〇FAM72A〇ID〇009576	1.6	(1.1-2.4)	1.1	2.4	0.026
ES〇AP2B1〇ID〇040319	0.6	(0.4-0.91)	0.4	0.91	0.017
AD〇NCOR2〇ID〇025143	0.65	(0.43-0.99)	0.43	0.99	0.043
AP〇BCAS3〇ID〇042864	0.61	(0.4-0.94)	0.4	0.94	0.023
AP〇BCAS3〇ID〇042865	1.7	(1.1-2.6)	1.1	2.6	0.016
ES〇COL16A1〇ID〇001493	2	(1.3-3)	1.3	3	0.002
AP〇KIAA1217〇ID〇010995	0.59	(0.38-0.9)	0.38	0.9	0.014
AT〇EIF4E2〇ID〇057999	0.57	(0.38-0.87)	0.38	0.87	0.009
AP〇COMMD5〇ID〇085671	1.9	(1.2-2.9)	1.2	2.9	0.0039
AP〇COMMD5〇ID〇085672	0.56	(0.36-0.86)	0.36	0.86	0.0085
AT〇ANTXR1〇ID〇053845	0.64	(0.42-0.98)	0.42	0.98	0.04
AT〇ANTXR1〇ID〇053844	1.6	(1-2.4)	1	2.4	0.031
AP〇MARK2〇ID〇016537	1.7	(1.1-2.5)	1.1	2.5	0.015
ES〇ABLIM1〇ID〇013209	0.59	(0.38-0.92)	0.38	0.92	0.02
AP〇LDB1〇ID〇012935	0.64	(0.43-0.97)	0.43	0.97	0.036
AP〇LDB1〇ID〇012934	1.6	(1-2.3)	1	2.3	0.036
ES〇APP〇ID〇060282	1.6	(1.1-2.4)	1.1	2.4	0.028
AT〇PCDH7〇ID〇068993	1.9	(1.2-3)	1.2	3	0.0032
AT〇PCDH7〇ID〇068994	0.53	(0.34-0.81)	0.34	0.81	0.0037
AT〇GINS4〇ID〇083516	0.59	(0.39-0.9)	0.39	0.9	0.014
AT〇GINS4〇ID〇083515	1.7	(1.1-2.6)	1.1	2.6	0.014
AT〇CD300LG〇ID〇041725	0.59	(0.35-0.98)	0.35	0.98	0.042
ES〇RALY〇ID〇059017	1.5	(1-2.3)	1	2.3	0.041
ES〇NDRG2〇ID〇026512	2.7	(1.7-4.2)	1.7	4.2	2.7e-05
ES〇MARK3〇ID〇029450	0.62	(0.41-0.94)	0.41	0.94	0.024
AT〇KIF4A〇ID〇089373	1.7	(1.1-2.5)	1.1	2.5	0.024
AT〇KIF4A〇ID〇089372	0.61	(0.39-0.93)	0.39	0.93	0.024
AT〇PAPOLA〇ID〇029202	0.5	(0.33-0.76)	0.33	0.76	0.0011
AT〇ITGBL1〇ID〇026207	1.9	(1.3-3)	1.3	3	0.0026
AT〇ITGBL1〇ID〇026208	0.52	(0.34-0.79)	0.34	0.79	0.0026
AT〇KANK3〇ID〇047221	1.9	(1.3-3)	1.3	3	0.0029
AT〇KANK3〇ID〇047222	0.52	(0.34-0.8)	0.34	0.8	0.0029
RI〇RPS27A〇ID〇053606	1.8	(1.2-2.7)	1.2	2.7	0.0071
ES〇FN1〇ID〇384489	2	(1.2-3.1)	1.2	3.1	0.0049
AP〇S100A2〇ID〇007720	1.7	(1.1-2.5)	1.1	2.5	0.017
ES〇DMKN〇ID〇049199	0.64	(0.41-1)	0.41	1	0.049
ES〇APMAP〇ID〇058855	1.6	(1-2.3)	1	2.3	0.036
AT〇LINC00908〇ID〇045829	1.7	(1.1-2.6)	1.1	2.6	0.011
AT〇DNMT3A〇ID〇052856	1.8	(1.2-2.8)	1.2	2.8	0.0048
AT〇DNMT3A〇ID〇052857	0.55	(0.36-0.83)	0.36	0.83	0.0048
ES〇PIP5K1C〇ID〇046724	0.51	(0.33-0.79)	0.33	0.79	0.0026
AT〇CDCP1〇ID〇064397	1.6	(1-2.4)	1	2.4	0.033
AT〇CDCP1〇ID〇064398	0.64	(0.42-0.96)	0.42	0.96	0.033
ES〇PUM2〇ID〇052774	1.5	(1-2.3)	1	2.3	0.04
AT〇HPS1〇ID〇012760	1.6	(1-2.4)	1	2.4	0.029
AT〇HPS1〇ID〇012761	0.63	(0.42-0.95)	0.42	0.95	0.029
AP〇MKL2〇ID〇034068	0.57	(0.35-0.92)	0.35	0.92	0.021
ES〇TFDP1〇ID〇026393	1.6	(1.1-2.4)	1.1	2.4	0.026
AD〇RPS14〇ID〇074095	1.7	(1.1-2.6)	1.1	2.6	0.013
AP〇RCAN2〇ID〇076416	0.53	(0.33-0.86)	0.33	0.86	0.01
ES〇CCNDBP1〇ID〇030220	0.66	(0.43-0.99)	0.43	0.99	0.045
RI〇USHBP1〇ID〇048248	1.6	(1-2.4)	1	2.4	0.033
AD〇RPS14〇ID〇074096	1.5	(1-2.3)	1	2.3	0.041
ES〇DNAJC19〇ID〇067760	1.9	(1.3-3)	1.3	3	0.0021
AP〇WRB〇ID〇060626	0.58	(0.38-0.89)	0.38	0.89	0.012
AP〇WRB〇ID〇060627	1.7	(1.1-2.5)	1.1	2.5	0.019
AT〇FANCD2〇ID〇063307	2	(1.3-3.2)	1.3	3.2	0.0019
AT〇FANCD2〇ID〇063304	0.48	(0.31-0.75)	0.31	0.75	0.0012
AP〇GAS7〇ID〇039261	0.63	(0.39-1)	0.39	1	0.049
AA〇QKI〇ID〇078411	0.57	(0.38-0.88)	0.38	0.88	0.01
AT〇SPATA6L〇ID〇085752	1.5	(1-2.3)	1	2.3	0.044
AP〇ENSA〇ID〇007490	0.52	(0.34-0.8)	0.34	0.8	0.0024
AP〇ENSA〇ID〇007491	1.9	(1.3-2.9)	1.3	2.9	0.0024
AP〇RPL27〇ID〇041172	1.6	(1-2.4)	1	2.4	0.03
ES〇DMKN〇ID〇049177	0.62	(0.4-0.96)	0.4	0.96	0.03
AT〇ITSN1〇ID〇060466	0.47	(0.3-0.73)	0.3	0.73	0.0007
AP〇ARGLU1〇ID〇026232	1.7	(1.1-2.5)	1.1	2.5	0.015
AP〇ARGLU1〇ID〇026231	0.58	(0.39-0.89)	0.39	0.89	0.012
ES〇CD97〇ID〇047968	0.62	(0.41-0.94)	0.41	0.94	0.025
AP〇RCAN2〇ID〇076415	1.7	(1.1-2.8)	1.1	2.8	0.021
AT〇SPATA6L〇ID〇085753	0.62	(0.41-0.94)	0.41	0.94	0.023
AP〇FBLN5〇ID〇028887	1.6	(1-2.4)	1	2.4	0.04
AP〇FBLN5〇ID〇028888	0.64	(0.42-0.98)	0.42	0.98	0.04
AT〇UPB1〇ID〇061404	0.64	(0.41-0.97)	0.41	0.97	0.038
AT〇ABCC6〇ID〇034219	0.64	(0.42-0.96)	0.42	0.96	0.031
AT〇ABCC6〇ID〇034220	1.6	(1-2.4)	1	2.4	0.031
AT〇NEK2〇ID〇009717	2.1	(1.4-3.3)	1.4	3.3	0.00098
AT〇NEK2〇ID〇009718	0.48	(0.31-0.74)	0.31	0.74	0.00098
AA〇MOSPD2〇ID〇088542	1.9	(1.2-2.8)	1.2	2.8	0.0037
AT〇FLCN〇ID〇039460	2	(1.3-3.1)	1.3	3.1	0.0012
AT〇FLCN〇ID〇039461	0.5	(0.33-0.76)	0.33	0.76	0.0012
AT〇AK2〇ID〇001651	0.6	(0.4-0.91)	0.4	0.91	0.016
AT〇CHEK1〇ID〇019312	0.59	(0.39-0.9)	0.39	0.9	0.014
AT〇CHEK1〇ID〇019311	1.7	(1.1-2.6)	1.1	2.6	0.014
AT〇EIF4E2〇ID〇058000	2.3	(1.5-3.6)	1.5	3.6	0.00013
RI〇RPL30〇ID〇084641	1.9	(1.3-3)	1.3	3	0.0019
AA〇FAM63A〇ID〇007539	0.54	(0.35-0.85)	0.35	0.85	0.0069
AD〇RPL21〇ID〇025524	0.65	(0.42-0.99)	0.42	0.99	0.045
AP〇SCNM1〇ID〇007564	1.5	(1-2.3)	1	2.3	0.046
AP〇SCNM1〇ID〇007563	0.66	(0.44-0.99)	0.44	0.99	0.046
ES〇SYNRG〇ID〇040526	0.62	(0.41-0.94)	0.41	0.94	0.024
AT〇ZNF365〇ID〇011879	1.5	(1-2.3)	1	2.3	0.042
AP〇ACAP1〇ID〇038921	0.53	(0.35-0.81)	0.35	0.81	0.0032
AP〇ELMO1〇ID〇079266	0.56	(0.37-0.84)	0.37	0.84	0.0059
AP〇TMEM64〇ID〇084415	0.55	(0.33-0.93)	0.33	0.93	0.025
AA〇IL32〇ID〇033418	1.6	(1-2.4)	1	2.4	0.035
RI〇CCPG1〇ID〇030726	1.7	(1.1-2.5)	1.1	2.5	0.016
AA〇MKNK2〇ID〇046570	0.57	(0.38-0.88)	0.38	0.88	0.011
ES〇PIP5K1A〇ID〇007580	0.65	(0.43-1)	0.43	1	0.048
AT〇TROAP〇ID〇021551	0.57	(0.38-0.88)	0.38	0.88	0.01
AP〇PTPN6〇ID〇020023	0.64	(0.43-0.98)	0.43	0.98	0.039
AP〇PTPN6〇ID〇020022	1.6	(1.1-2.4)	1.1	2.4	0.028
ES〇PTPRA〇ID〇058567	0.62	(0.41-0.93)	0.41	0.93	0.022
AT〇LINC00908〇ID〇045828	0.63	(0.42-0.96)	0.42	0.96	0.03
AT〇ACPP〇ID〇066803	1.6	(1-2.4)	1	2.4	0.037
AT〇ACPP〇ID〇066802	0.64	(0.42-0.97)	0.42	0.97	0.037
AT〇FBXL20〇ID〇040642	0.62	(0.41-0.94)	0.41	0.94	0.025
AT〇FBXL20〇ID〇040641	1.6	(1.1-2.4)	1.1	2.4	0.025
ES〇AGR3〇ID〇078876	0.54	(0.34-0.84)	0.34	0.84	0.007
AP〇PMP22〇ID〇039341	0.63	(0.41-0.96)	0.41	0.96	0.03
AP〇PMP22〇ID〇039340	1.6	(1-2.4)	1	2.4	0.03
AP〇S100A2〇ID〇007717	0.65	(0.43-1)	0.43	1	0.049
AT〇PAPOLA〇ID〇029203	1.7	(1.1-2.5)	1.1	2.5	0.015
ES〇PLSCR1〇ID〇067168	0.57	(0.36-0.91)	0.36	0.91	0.019
AP〇LAMA3〇ID〇044844	0.52	(0.32-0.84)	0.32	0.84	0.0083
AP〇LAMA3〇ID〇044845	1.9	(1.2-3.2)	1.2	3.2	0.0083
AA〇ADHFE1〇ID〇084004	1.9	(1.2-3)	1.2	3	0.0095
AT〇MORN1〇ID〇000253	0.65	(0.43-0.98)	0.43	0.98	0.042
ES〇EIF4H〇ID〇080063	1.5	(1-2.3)	1	2.3	0.039
ES〇MEGF6〇ID〇000315	0.58	(0.38-0.88)	0.38	0.88	0.011
ES〇C16orf13〇ID〇032924	0.57	(0.37-0.86)	0.37	0.86	0.0082
ES〇IL32〇ID〇033377	0.63	(0.42-0.96)	0.42	0.96	0.032
ES〇PPFIBP1〇ID〇020893	0.6	(0.36-0.99)	0.36	0.99	0.044
AP〇PHEX〇ID〇088684	0.65	(0.42-0.99)	0.42	0.99	0.043
ES〇CLDND1〇ID〇065783	1.7	(1.1-2.6)	1.1	2.6	0.015
ES〇TP53I3〇ID〇052810	1.8	(1.2-2.7)	1.2	2.7	0.0066
ES〇USP15〇ID〇022830	0.57	(0.37-0.87)	0.37	0.87	0.0098
AP〇RARA〇ID〇040858	0.64	(0.42-0.96)	0.42	0.96	0.033
AP〇CENPI〇ID〇089629	0.64	(0.42-0.98)	0.42	0.98	0.04
AP〇CENPI〇ID〇089628	1.6	(1-2.4)	1	2.4	0.04
ES〇HNRNPK〇ID〇086715	1.5	(1-2.3)	1	2.3	0.048
ES〇HPCAL1〇ID〇052659	2.1	(1.4-3.3)	1.4	3.3	0.00042
AT〇CLIC5〇ID〇076411	1.5	(1-2.3)	1	2.3	0.046
AT〇CLIC5〇ID〇076410	0.6	(0.39-0.92)	0.39	0.92	0.018
RI〇ANKRD65〇ID〇000170	1.6	(1-2.4)	1	2.4	0.048
AP〇CLU〇ID〇083170	0.54	(0.35-0.82)	0.35	0.82	0.0043
AT〇TRIM73〇ID〇080116	0.58	(0.38-0.88)	0.38	0.88	0.0098
AT〇TRIM73〇ID〇080115	1.8	(1.2-2.8)	1.2	2.8	0.0044
ES〇ADAM15〇ID〇007898	0.57	(0.37-0.86)	0.37	0.86	0.0078
ES〇BOD1〇ID〇074584	1.7	(1.1-2.6)	1.1	2.6	0.013
AT〇CFLAR〇ID〇056794	0.64	(0.42-0.97)	0.42	0.97	0.034
AP〇COPS7B〇ID〇057936	1.7	(1.1-2.6)	1.1	2.6	0.011
AP〇COPS7B〇ID〇057937	0.61	(0.4-0.93)	0.4	0.93	0.02
AT〇DNASE1〇ID〇033607	0.57	(0.38-0.88)	0.38	0.88	0.01
AP〇CLU〇ID〇083168	1.7	(1.1-2.7)	1.1	2.7	0.009
AP〇SPATS2L〇ID〇056734	1.6	(1-2.4)	1	2.4	0.032
ES〇CHCHD4〇ID〇063518	0.56	(0.37-0.85)	0.37	0.85	0.006
AT〇MORN1〇ID〇000252	1.6	(1-2.4)	1	2.4	0.03
AT〇RGS1〇ID〇009235	0.62	(0.41-0.96)	0.41	0.96	0.03
AT〇RGS1〇ID〇009234	1.6	(1-2.4)	1	2.4	0.03
ES〇ALG2〇ID〇087057	2	(1.3-3)	1.3	3	0.0014
AT〇IL1RAP〇ID〇068105	1.7	(1.1-2.6)	1.1	2.6	0.011
AT〇TNFRSF10C〇ID〇083064	0.51	(0.33-0.78)	0.33	0.78	0.0022
AT〇TNFRSF10C〇ID〇083065	2	(1.3-3.1)	1.3	3.1	0.0022
AA〇BUB3〇ID〇013390	1.5	(1-2.3)	1	2.3	0.043
ES〇IL32〇ID〇033440	1.6	(1-2.4)	1	2.4	0.035
ES〇PRMT1〇ID〇051042	0.59	(0.39-0.9)	0.39	0.9	0.015
ES〇RAB28〇ID〇068792	1.6	(1.1-2.5)	1.1	2.5	0.022
AT〇CENPK〇ID〇072213	0.52	(0.34-0.8)	0.34	0.8	0.0031
AT〇CENPK〇ID〇072212	1.9	(1.2-2.9)	1.2	2.9	0.0031
ME〇FBLN5〇ID〇028892	0.6	(0.4-0.92)	0.4	0.92	0.019
ES〇RTN4〇ID〇053594	0.65	(0.43-0.99)	0.43	0.99	0.043
AP〇ZNF395〇ID〇083210	0.58	(0.35-0.96)	0.35	0.96	0.034
AT〇SPATA24〇ID〇073605	1.6	(1-2.4)	1	2.4	0.037
AA〇IL32〇ID〇033427	1.8	(1.2-2.8)	1.2	2.8	0.0044
AT〇EP400NL〇ID〇025241	1.7	(1.1-2.6)	1.1	2.6	0.013
AP〇ARHGEF25〇ID〇022664	0.61	(0.39-0.95)	0.39	0.95	0.028
AP〇ARHGEF25〇ID〇022665	1.6	(1-2.5)	1	2.5	0.045
AD〇POLM〇ID〇079449	1.7	(1.1-2.6)	1.1	2.6	0.015
RI〇NFATC4〇ID〇026991	0.62	(0.41-0.94)	0.41	0.94	0.024
ES〇IL32〇ID〇033437	2	(1.3-3)	1.3	3	0.002
ES〇ZDHHC7〇ID〇037873	1.6	(1.1-2.4)	1.1	2.4	0.026
AT〇SYNPO〇ID〇074104	0.61	(0.4-0.92)	0.4	0.92	0.019
AT〇SYNPO〇ID〇074103	1.6	(1.1-2.5)	1.1	2.5	0.019
AP〇DNMT3A〇ID〇052854	1.6	(1-2.6)	1	2.6	0.043
AD〇EIF3K〇ID〇049684	1.5	(1-2.4)	1	2.4	0.046
AA〇RASSF7〇ID〇013691	1.6	(1.1-2.4)	1.1	2.4	0.024
AA〇ZDHHC8〇ID〇061144	2.3	(1.5-3.6)	1.5	3.6	0.00014
RI〇CTNNB1〇ID〇064250	0.6	(0.4-0.92)	0.4	0.92	0.018
AT〇RDM1〇ID〇040348	1.6	(1-2.5)	1	2.5	0.029
AT〇RDM1〇ID〇040349	0.62	(0.4-0.95)	0.4	0.95	0.029
ES〇ISCU〇ID〇024244	1.8	(1.2-2.7)	1.2	2.7	0.0074
AP〇MID1〇ID〇088463	0.62	(0.41-0.94)	0.41	0.94	0.024
ES〇JOSD2〇ID〇051205	0.56	(0.37-0.86)	0.37	0.86	0.0072
AT〇HDAC9〇ID〇078890	0.61	(0.4-0.93)	0.4	0.93	0.021
AT〇HDAC9〇ID〇078891	1.6	(1.1-2.5)	1.1	2.5	0.021
ES〇UBE2G2〇ID〇060831	1.7	(1.1-2.5)	1.1	2.5	0.017
ES〇DYSF〇ID〇053938	0.49	(0.3-0.79)	0.3	0.79	0.0036
ES〇SNAPC5〇ID〇031278	1.6	(1.1-2.5)	1.1	2.5	0.021
ES〇TARS2〇ID〇007475	1.6	(1.1-2.5)	1.1	2.5	0.02
AT〇NFASC〇ID〇009493	1.6	(1.1-2.5)	1.1	2.5	0.021
AT〇NFASC〇ID〇009492	0.62	(0.41-0.94)	0.41	0.94	0.026
ES〇DTX2〇ID〇080174	1.8	(1.2-2.7)	1.2	2.7	0.0085
ES〇CTDSPL〇ID〇064002	0.63	(0.4-0.98)	0.4	0.98	0.04
AT〇GTF2H2C〇ID〇072388	0.58	(0.38-0.88)	0.38	0.88	0.011
ES〇BAG1〇ID〇086098	1.5	(1-2.3)	1	2.3	0.046
AT〇ERCC1〇ID〇050441	0.64	(0.42-0.98)	0.42	0.98	0.041
AT〇ERCC1〇ID〇050442	1.6	(1-2.4)	1	2.4	0.041
AD〇RASSF7〇ID〇013692	1.6	(1.1-2.5)	1.1	2.5	0.02
ES〇SNRNP200〇ID〇563710	0.62	(0.41-0.95)	0.41	0.95	0.03
AP〇RCC1〇ID〇001387	1.5	(1-2.3)	1	2.3	0.041
AP〇RCC1〇ID〇001386	0.65	(0.43-0.98)	0.43	0.98	0.041
AT〇SMAD2〇ID〇045449	0.64	(0.42-0.97)	0.42	0.97	0.033
AT〇SMAD2〇ID〇045450	1.6	(1-2.4)	1	2.4	0.033
ES〇PLSCR1〇ID〇067169	0.58	(0.39-0.88)	0.39	0.88	0.011
AT〇CFH〇ID〇009276	0.62	(0.41-0.93)	0.41	0.93	0.022
AT〇CFH〇ID〇009275	1.6	(1.1-2.5)	1.1	2.5	0.022
AT〇SNRPF〇ID〇023809	1.5	(1-2.3)	1	2.3	0.048
ES〇RRBP1〇ID〇058743	0.58	(0.38-0.87)	0.38	0.87	0.0088
AT〇C9orf85〇ID〇086576	1.6	(1-2.4)	1	2.4	0.03
AT〇C9orf85〇ID〇086575	0.63	(0.42-0.96)	0.42	0.96	0.03
AP〇ACAP1〇ID〇038918	2	(1.3-3.1)	1.3	3.1	0.0011
ES〇YIPF1〇ID〇003074	0.62	(0.41-0.94)	0.41	0.94	0.024
AP〇FBXO5〇ID〇078210	0.59	(0.38-0.91)	0.38	0.91	0.016
AP〇FBXO5〇ID〇078211	1.7	(1.1-2.7)	1.1	2.7	0.014
AP〇ZNF185〇ID〇090395	0.63	(0.4-0.98)	0.4	0.98	0.041
ES〇PSEN2〇ID〇010034	1.6	(1-2.4)	1	2.4	0.035
ES〇ANO1〇ID〇017387	0.59	(0.38-0.92)	0.38	0.92	0.019
ES〇C14orf2〇ID〇029533	1.6	(1-2.5)	1	2.5	0.046
ES〇POSTN〇ID〇025672	0.62	(0.4-0.95)	0.4	0.95	0.029
AP〇PDE4D〇ID〇072135	1.7	(1.1-2.6)	1.1	2.6	0.014
AT〇CAPN12〇ID〇049690	1.8	(1.2-2.8)	1.2	2.8	0.0055
AT〇CAPN12〇ID〇049691	0.56	(0.36-0.85)	0.36	0.85	0.0072
ES〇KIAA0430〇ID〇034178	1.5	(1-2.4)	1	2.4	0.047
AT〇GSTK1〇ID〇082077	1.6	(1.1-2.5)	1.1	2.5	0.021
AT〇GSTK1〇ID〇082078	0.61	(0.4-0.93)	0.4	0.93	0.021
ES〇HIBCH〇ID〇056560	0.58	(0.38-0.89)	0.38	0.89	0.013
AP〇CHRNB1〇ID〇038959	1.7	(1.1-2.6)	1.1	2.6	0.014
ES〇MBD1〇ID〇045518	1.7	(1.1-2.6)	1.1	2.6	0.011
ES〇CA5B〇ID〇098313	0.47	(0.3-0.72)	0.3	0.72	0.00056
ES〇KANSL3〇ID〇054543	0.61	(0.4-0.92)	0.4	0.92	0.02
AT〇GTF2H2C〇ID〇072389	1.6	(1.1-2.5)	1.1	2.5	0.022
AT〇SSU72〇ID〇000180	1.7	(1.1-2.6)	1.1	2.6	0.012
AT〇SSU72〇ID〇000179	0.58	(0.38-0.89)	0.38	0.89	0.012
AT〇ATP8B3〇ID〇046544	1.6	(1-2.4)	1	2.4	0.034
AT〇ATP8B3〇ID〇046543	0.64	(0.42-0.97)	0.42	0.97	0.034
AT〇BICD1〇ID〇021020	1.5	(1-2.3)	1	2.3	0.049
AT〇BICD1〇ID〇021019	0.66	(0.44-1)	0.44	1	0.049
AP〇NFYC〇ID〇002015	0.6	(0.39-0.91)	0.39	0.91	0.016
ES〇DCAF6〇ID〇008881	0.58	(0.37-0.93)	0.37	0.93	0.023
AD〇IFI35〇ID〇041177	1.7	(1.1-2.5)	1.1	2.5	0.016
ES〇NFIB〇ID〇085884	1.6	(1-2.4)	1	2.4	0.046
AT〇FEZ1〇ID〇019294	1.6	(1.1-2.4)	1.1	2.4	0.024
AT〇FEZ1〇ID〇019295	0.62	(0.41-0.94)	0.41	0.94	0.024
RI〇SMIM7〇ID〇048188	0.65	(0.43-0.99)	0.43	0.99	0.044
AA〇ODF2〇ID〇087760	0.58	(0.38-0.88)	0.38	0.88	0.01
AT〇FAM72A〇ID〇009579	0.61	(0.4-0.93)	0.4	0.93	0.022
AT〇ST3GAL5〇ID〇054385	1.6	(1.1-2.4)	1.1	2.4	0.027
AT〇ST3GAL5〇ID〇054384	0.62	(0.41-0.95)	0.41	0.95	0.027
AT〇NMD3〇ID〇067509	2.2	(1.4-3.4)	1.4	3.4	0.00044
AT〇NMD3〇ID〇067508	0.45	(0.29-0.71)	0.29	0.71	0.00044
ES〇TSPO〇ID〇062572	0.6	(0.4-0.91)	0.4	0.91	0.017
AP〇CTNNBIP1〇ID〇000577	0.6	(0.39-0.91)	0.39	0.91	0.017
AA〇PRR13〇ID〇022033	0.65	(0.43-0.98)	0.43	0.98	0.042
ES〇GPS1〇ID〇044286	2.3	(1.5-3.5)	1.5	3.5	0.00017
AP〇DPYSL3〇ID〇073958	1.6	(1.1-2.4)	1.1	2.4	0.026
AP〇DPYSL3〇ID〇073957	0.63	(0.41-0.95)	0.41	0.95	0.028
ES〇IL32〇ID〇033433	1.7	(1.1-2.5)	1.1	2.5	0.018
ES〇BIN1〇ID〇055195	1.5	(1-2.3)	1	2.3	0.044
AT〇TMPRSS13〇ID〇018946	0.61	(0.4-0.93)	0.4	0.93	0.022
ES〇UGDH〇ID〇069071	0.62	(0.41-0.95)	0.41	0.95	0.028
ME〇CCT3〇ID〇099558	1.6	(1.1-2.5)	1.1	2.5	0.019
RI〇GPS2〇ID〇038915	1.9	(1.2-2.9)	1.2	2.9	0.0041
AT〇ZCCHC4〇ID〇068961	1.6	(1-2.4)	1	2.4	0.031
AT〇ZCCHC4〇ID〇068960	0.65	(0.43-0.99)	0.43	0.99	0.043
ME〇SNRPD2〇ID〇116024	0.57	(0.37-0.87)	0.37	0.87	0.0097
ES〇CMC2〇ID〇037706	2.1	(1.4-3.2)	1.4	3.2	0.00062
AP〇ZNF106〇ID〇030163	0.55	(0.33-0.9)	0.33	0.9	0.019
AP〇ZNF106〇ID〇030162	1.9	(1.2-3.2)	1.2	3.2	0.0099
ES〇TEX261〇ID〇053912	0.5	(0.33-0.76)	0.33	0.76	0.0012
ES〇RHOT1〇ID〇040180	1.7	(1.1-2.6)	1.1	2.6	0.014
AP〇FAM49B〇ID〇085138	1.5	(1-2.4)	1	2.4	0.043
ES〇DENND4C〇ID〇085968	1.6	(1.1-2.5)	1.1	2.5	0.023
AT〇LINC00908〇ID〇045830	0.6	(0.37-0.99)	0.37	0.99	0.046
AT〇COL6A2〇ID〇060897	1.8	(1.2-2.7)	1.2	2.7	0.0091
AT〇COL6A2〇ID〇060896	0.57	(0.37-0.87)	0.37	0.87	0.0091
ES〇CHURC1〇ID〇027912	0.63	(0.41-0.95)	0.41	0.95	0.028
ES〇WIPI2〇ID〇078656	1.5	(1-2.3)	1	2.3	0.04
AD〇RPL14〇ID〇064220	1.5	(1-2.3)	1	2.3	0.047
AP〇ACSL5〇ID〇013111	0.62	(0.41-0.95)	0.41	0.95	0.027
ES〇RHOT1〇ID〇040177	0.61	(0.39-0.95)	0.39	0.95	0.029
AP〇PCNA〇ID〇058648	0.64	(0.43-0.97)	0.43	0.97	0.036
AP〇PCNA〇ID〇058649	1.6	(1-2.4)	1	2.4	0.032
AT〇CDH23〇ID〇012060	0.65	(0.43-0.99)	0.43	0.99	0.047
RI〇EIF3C〇ID〇035830	1.6	(1-2.4)	1	2.4	0.039
AA〇CD34〇ID〇009668	1.6	(1.1-2.5)	1.1	2.5	0.026
AP〇LTBP4〇ID〇049929	1.9	(1.2-3.2)	1.2	3.2	0.011
AT〇PHLDB2〇ID〇066063	1.9	(1.2-2.9)	1.2	2.9	0.0036
AP〇ARRDC2〇ID〇048388	0.57	(0.37-0.87)	0.37	0.87	0.0089
AP〇ARRDC2〇ID〇048387	1.7	(1.1-2.6)	1.1	2.6	0.016
ES〇RNF14〇ID〇073846	1.8	(1.2-2.7)	1.2	2.7	0.009
AT〇ZNF726〇ID〇048832	1.5	(1-2.3)	1	2.3	0.038
AT〇TMBIM4〇ID〇022893	1.7	(1.1-2.5)	1.1	2.5	0.017
AT〇TMBIM4〇ID〇022891	0.61	(0.4-0.92)	0.4	0.92	0.017
ES〇YWHAE〇ID〇038297	0.62	(0.4-0.97)	0.4	0.97	0.036
ES〇COX20〇ID〇010475	1.6	(1-2.4)	1	2.4	0.035
AA〇FLAD1〇ID〇007869	0.56	(0.37-0.86)	0.37	0.86	0.0075
AP〇LTBP4〇ID〇049928	0.52	(0.31-0.87)	0.31	0.87	0.012
ES〇TTC7B〇ID〇028826	0.61	(0.39-0.96)	0.39	0.96	0.033
AD〇DNAJC19〇ID〇067759	1.7	(1.1-2.6)	1.1	2.6	0.011
ES〇IL32〇ID〇033432	1.5	(1-2.3)	1	2.3	0.049
ES〇PTPN2〇ID〇044723	0.52	(0.34-0.8)	0.34	0.8	0.003
AP〇NUDT6〇ID〇070523	1.8	(1.2-2.7)	1.2	2.7	0.0084
ES〇CCNB1IP1〇ID〇026423	0.65	(0.43-1)	0.43	1	0.048
AP〇SEPT9〇ID〇043724	0.63	(0.41-0.95)	0.41	0.95	0.027
AP〇DNMT3A〇ID〇052853	0.57	(0.35-0.91)	0.35	0.91	0.02
AP〇UBE2D3〇ID〇070122	1.9	(1.2-2.9)	1.2	2.9	0.0033
AD〇LARP7〇ID〇070390	1.6	(1.1-2.4)	1.1	2.4	0.026
AT〇ZNF677〇ID〇051704	0.59	(0.39-0.89)	0.39	0.89	0.012
AP〇FAM129B〇ID〇087638	1.5	(1-2.3)	1	2.3	0.041
AP〇FAM129B〇ID〇087639	0.65	(0.43-0.98)	0.43	0.98	0.041
AP〇NUDT6〇ID〇070521	0.61	(0.4-0.94)	0.4	0.94	0.024
AT〇YAE1D1〇ID〇079301	0.65	(0.43-0.99)	0.43	0.99	0.046
AT〇YAE1D1〇ID〇079302	1.5	(1-2.3)	1	2.3	0.046
RI〇CTNNB1〇ID〇064249	0.46	(0.29-0.71)	0.29	0.71	0.00043
ES〇SPATC1L〇ID〇060904	0.5	(0.32-0.8)	0.32	0.8	0.0041
AP〇S100A14〇ID〇007727	1.8	(1.1-2.9)	1.1	2.9	0.018
AP〇S100A14〇ID〇007729	0.55	(0.34-0.89)	0.34	0.89	0.015
AT〇NUPL2〇ID〇078961	2.3	(1.5-3.6)	1.5	3.6	0.00022
AT〇NUPL2〇ID〇078960	0.44	(0.28-0.68)	0.28	0.68	0.00022
AT〇OSMR〇ID〇071850	0.57	(0.37-0.87)	0.37	0.87	0.0099
AT〇OSMR〇ID〇071849	1.8	(1.1-2.7)	1.1	2.7	0.0099
AP〇CDYL〇ID〇075231	0.61	(0.4-0.92)	0.4	0.92	0.019
ES〇DYNLL1〇ID〇024766	0.57	(0.35-0.91)	0.35	0.91	0.018
ES〇LMO7〇ID〇026068	1.6	(1-2.4)	1	2.4	0.029
RI〇EEF1B2〇ID〇057143	0.59	(0.39-0.9)	0.39	0.9	0.014
AA〇TNFRSF12A〇ID〇033350	0.57	(0.38-0.88)	0.38	0.88	0.011
ME〇RAB6A〇ID〇017707	1.7	(1.1-2.6)	1.1	2.6	0.014
ES〇OGFOD2〇ID〇025010	0.64	(0.41-0.98)	0.41	0.98	0.042
AP〇ACAT2〇ID〇078314	0.6	(0.39-0.91)	0.39	0.91	0.018
AP〇ACAT2〇ID〇078315	1.6	(1.1-2.5)	1.1	2.5	0.021
AP〇DIDO1〇ID〇060090	1.7	(1.1-2.5)	1.1	2.5	0.018
AP〇DIDO1〇ID〇060089	0.62	(0.41-0.94)	0.41	0.94	0.024
AP〇SPRY1〇ID〇070528	1.6	(1-2.4)	1	2.4	0.031
AP〇SPRY1〇ID〇070529	0.6	(0.4-0.92)	0.4	0.92	0.02
AT〇SEPT11〇ID〇069616	1.9	(1.2-2.9)	1.2	2.9	0.0043
AT〇TRNT1〇ID〇062977	1.8	(1.2-2.8)	1.2	2.8	0.0045
AT〇WDR96〇ID〇013039	0.58	(0.37-0.89)	0.37	0.89	0.014
AT〇ABCA3〇ID〇033266	0.62	(0.41-0.94)	0.41	0.94	0.024
AT〇ABCA3〇ID〇033265	1.6	(1.1-2.5)	1.1	2.5	0.024
AP〇FNTB〇ID〇027914	1.9	(1.3-3)	1.3	3	0.0022
AP〇FNTB〇ID〇027915	0.51	(0.34-0.79)	0.34	0.79	0.0022
RI〇RRNAD1〇ID〇008313	0.62	(0.41-0.95)	0.41	0.95	0.027
ES〇FAM49B〇ID〇085146	0.61	(0.4-0.94)	0.4	0.94	0.024
AP〇MAP1LC3A〇ID〇059028	0.51	(0.33-0.78)	0.33	0.78	0.0018
AP〇MAP1LC3A〇ID〇059029	2	(1.3-3)	1.3	3	0.0018
AP〇NXT2〇ID〇089866	0.63	(0.4-0.98)	0.4	0.98	0.042
AP〇CGREF1〇ID〇052931	0.64	(0.42-0.99)	0.42	0.99	0.044
ES〇C19orf60〇ID〇048490	0.64	(0.42-0.98)	0.42	0.98	0.039
AT〇NDUFA3〇ID〇051774	1.8	(1.2-2.8)	1.2	2.8	0.0059
AT〇CLEC16A〇ID〇034003	1.5	(1-2.3)	1	2.3	0.041
AT〇CLEC16A〇ID〇034004	0.65	(0.43-0.98)	0.43	0.98	0.041
AT〇DST〇ID〇076557	0.6	(0.39-0.91)	0.39	0.91	0.016
ES〇COX4I1〇ID〇156372	0.61	(0.39-0.94)	0.39	0.94	0.024
ES〇POSTN〇ID〇025673	0.48	(0.32-0.74)	0.32	0.74	0.00076
ES〇PIGQ〇ID〇032903	0.65	(0.42-0.99)	0.42	0.99	0.047
ES〇CLDND1〇ID〇065784	1.8	(1.2-2.8)	1.2	2.8	0.0046
AP〇CDYL〇ID〇075229	1.8	(1.2-2.7)	1.2	2.7	0.0074
AT〇C2orf43〇ID〇052786	0.56	(0.37-0.85)	0.37	0.85	0.007
AD〇IKBKB〇ID〇083705	0.52	(0.32-0.83)	0.32	0.83	0.0066
ES〇ARFRP1〇ID〇060157	1.6	(1.1-2.4)	1.1	2.4	0.026
ES〇ATP6V1H〇ID〇083833	0.64	(0.42-0.97)	0.42	0.97	0.037
ES〇MED24〇ID〇040831	1.8	(1.1-2.7)	1.1	2.7	0.011
ES〇HSF2〇ID〇077374	0.61	(0.4-0.93)	0.4	0.93	0.022
AA〇TMC4〇ID〇051801	1.6	(1.1-2.5)	1.1	2.5	0.025
AT〇RNF180〇ID〇072195	1.6	(1-2.4)	1	2.4	0.033
AT〇RNF180〇ID〇072196	0.64	(0.42-0.96)	0.42	0.96	0.033
AP〇EFNA3〇ID〇007936	0.58	(0.38-0.89)	0.38	0.89	0.013
AP〇THAP4〇ID〇058392	0.63	(0.41-0.95)	0.41	0.95	0.027
AP〇THAP4〇ID〇058391	1.5	(1-2.3)	1	2.3	0.042
ES〇ATP13A2〇ID〇000841	1.6	(1-2.4)	1	2.4	0.03
AD〇SSBP1〇ID〇082055	1.6	(1-2.4)	1	2.4	0.034
AA〇MYL6〇ID〇022381	0.61	(0.4-0.94)	0.4	0.94	0.023
AA〇FBXO7〇ID〇061933	0.5	(0.32-0.76)	0.32	0.76	0.0014
ES〇CLEC1A〇ID〇020304	1.7	(1-2.6)	1	2.6	0.037
RI〇NFKBIB〇ID〇049718	0.65	(0.43-0.99)	0.43	0.99	0.046
AP〇CLASP2〇ID〇063869	0.6	(0.38-0.94)	0.38	0.94	0.024
ES〇RRN3〇ID〇034141	0.63	(0.41-0.96)	0.41	0.96	0.03
ES〇GPX8〇ID〇072028	1.5	(1-2.3)	1	2.3	0.046
AT〇MRPL2〇ID〇076236	1.9	(1.3-2.9)	1.3	2.9	0.0024
AT〇MRPL2〇ID〇076235	0.52	(0.34-0.79)	0.34	0.79	0.0024
ES〇MRPL33〇ID〇053046	1.8	(1.2-2.7)	1.2	2.7	0.0071
ES〇IRF3〇ID〇051029	0.63	(0.41-0.97)	0.41	0.97	0.036
AT〇RPGRIP1L〇ID〇036421	1.9	(1.2-2.9)	1.2	2.9	0.003
AD〇DAG1〇ID〇064888	2.5	(1.5-4)	1.5	4	0.00019
ES〇CRYZ〇ID〇003467	0.64	(0.42-0.97)	0.42	0.97	0.034
AP〇HYLS1〇ID〇019361	0.61	(0.4-0.93)	0.4	0.93	0.021
AP〇HLF〇ID〇042579	0.59	(0.35-0.99)	0.35	0.99	0.047
AT〇ZNF525〇ID〇051712	0.53	(0.35-0.81)	0.35	0.81	0.0033
AP〇FOXA2〇ID〇058837	1.7	(1-2.8)	1	2.8	0.033
ES〇RAB17〇ID〇058121	0.64	(0.42-0.98)	0.42	0.98	0.038
AP〇ZNF185〇ID〇090396	1.8	(1.1-2.8)	1.1	2.8	0.011
AD〇P4HB〇ID〇044185	1.5	(1-2.3)	1	2.3	0.042
ES〇GPR116〇ID〇076429	2.1	(1.4-3.2)	1.4	3.2	0.0007
AT〇ZNF528〇ID〇051454	0.62	(0.41-0.94)	0.41	0.94	0.023
AP〇ARHGAP22〇ID〇011480	0.61	(0.38-0.99)	0.38	0.99	0.043
AT〇GPR107〇ID〇087893	1.6	(1.1-2.4)	1.1	2.4	0.026
AT〇GPR107〇ID〇087892	0.62	(0.41-0.94)	0.41	0.94	0.026
AP〇EVL〇ID〇029241	0.63	(0.42-0.96)	0.42	0.96	0.032
AP〇DHRS4L2〇ID〇026795	0.65	(0.43-0.98)	0.43	0.98	0.042
ES〇ILK〇ID〇014173	1.7	(1.1-2.6)	1.1	2.6	0.011
AD〇SMEK1〇ID〇028880	0.62	(0.4-0.94)	0.4	0.94	0.025
AP〇SUN2〇ID〇062256	0.65	(0.43-0.99)	0.43	0.99	0.047
AT〇RASEF〇ID〇086677	0.63	(0.42-0.96)	0.42	0.96	0.031
AT〇RASEF〇ID〇086676	1.6	(1-2.4)	1	2.4	0.031
AT〇DST〇ID〇076559	1.7	(1.1-2.5)	1.1	2.5	0.015
RI〇TMEM256_PLSCR3〇ID〇038940	1.6	(1-2.4)	1	2.4	0.038
ES〇GOSR1〇ID〇040116	0.63	(0.42-0.95)	0.42	0.95	0.029
AT〇CC2D1B〇ID〇003001	1.6	(1-2.4)	1	2.4	0.032
AT〇CC2D1B〇ID〇003002	0.64	(0.42-0.96)	0.42	0.96	0.032
AT〇GABPB1〇ID〇030572	0.62	(0.41-0.94)	0.41	0.94	0.024
AT〇GABPB1〇ID〇030573	1.6	(1.1-2.4)	1.1	2.4	0.024
AT〇NDUFA3〇ID〇051776	0.6	(0.39-0.91)	0.39	0.91	0.015
ES〇HM13〇ID〇058891	0.56	(0.37-0.85)	0.37	0.85	0.0069
ES〇ASAP2〇ID〇052611	0.57	(0.36-0.92)	0.36	0.92	0.022
AP〇NPIPB3〇ID〇034443	0.65	(0.43-0.98)	0.43	0.98	0.042
AP〇ZNF524〇ID〇052116	1.9	(1.2-2.9)	1.2	2.9	0.0043
AP〇ZNF524〇ID〇052115	0.52	(0.34-0.81)	0.34	0.81	0.0036
AP〇CAPN3〇ID〇030149	1.6	(1.1-2.5)	1.1	2.5	0.024
AP〇TXN2〇ID〇062048	0.56	(0.37-0.85)	0.37	0.85	0.0065
AP〇TXN2〇ID〇062049	1.8	(1.2-2.7)	1.2	2.7	0.0065
AT〇SERPINB5〇ID〇045716	1.7	(1.1-2.6)	1.1	2.6	0.011
AT〇SERPINB5〇ID〇045717	0.57	(0.37-0.87)	0.37	0.87	0.0089
ES〇POSTN〇ID〇025674	0.52	(0.34-0.79)	0.34	0.79	0.0023
AP〇NGFRAP1〇ID〇089729	0.52	(0.34-0.79)	0.34	0.79	0.0021
AD〇DAP3〇ID〇008123	1.6	(1.1-2.5)	1.1	2.5	0.026
AP〇MGLL〇ID〇066624	1.6	(1.1-2.4)	1.1	2.4	0.028
AP〇MGLL〇ID〇066622	0.65	(0.43-0.98)	0.43	0.98	0.042
AT〇PPAN〇ID〇047460	1.6	(1.1-2.5)	1.1	2.5	0.021
AT〇PPAN〇ID〇047461	0.61	(0.4-0.93)	0.4	0.93	0.021
ES〇BBS1〇ID〇017048	1.5	(1-2.4)	1	2.4	0.046
AP〇GCA〇ID〇055769	0.47	(0.3-0.71)	0.3	0.71	0.00044
AT〇LY75〇ID〇055707	0.57	(0.38-0.88)	0.38	0.88	0.0099
AT〇LY75〇ID〇055708	1.7	(1.1-2.7)	1.1	2.7	0.0099
AA〇TYMP〇ID〇062854	0.6	(0.4-0.91)	0.4	0.91	0.017
ES〇OSBPL8〇ID〇023501	1.8	(1.1-3)	1.1	3	0.017
ES〇ZDHHC3〇ID〇064392	1.7	(1.1-2.6)	1.1	2.6	0.012
ES〇ATXN2〇ID〇024518	0.49	(0.31-0.75)	0.31	0.75	0.001
ES〇RBCK1〇ID〇058456	1.7	(1.1-2.6)	1.1	2.6	0.014
AP〇PDPR〇ID〇037327	0.61	(0.4-0.94)	0.4	0.94	0.024
AA〇DCAF11〇ID〇026840	0.53	(0.33-0.84)	0.33	0.84	0.0077
RI〇AP4B1〇ID〇004309	1.7	(1-2.7)	1	2.7	0.041
ES〇LMAN2L〇ID〇054569	0.65	(0.43-1)	0.43	1	0.048
AT〇ESCO2〇ID〇083184	0.48	(0.31-0.74)	0.31	0.74	0.0008
AT〇ESCO2〇ID〇083185	2.1	(1.4-3.2)	1.4	3.2	0.0008
ES〇MRPS18C〇ID〇069795	0.61	(0.4-0.93)	0.4	0.93	0.021
AT〇TMEM213〇ID〇081932	1.6	(1.1-2.5)	1.1	2.5	0.021
AT〇TMEM213〇ID〇081931	0.61	(0.4-0.93)	0.4	0.93	0.021
AT〇PPP2R5C〇ID〇029319	0.52	(0.34-0.8)	0.34	0.8	0.0027
RI〇NFE2L1〇ID〇042165	0.59	(0.38-0.9)	0.38	0.9	0.014
AP〇TCEB1〇ID〇084196	0.61	(0.4-0.92)	0.4	0.92	0.02
AP〇TCEB1〇ID〇084198	1.5	(1-2.3)	1	2.3	0.041
AP〇NFE2L2〇ID〇056127	1.5	(1-2.3)	1	2.3	0.044
ES〇PTPN2〇ID〇044724	0.6	(0.36-0.99)	0.36	0.99	0.045
ES〇CIDEB〇ID〇026959	1.8	(1.2-2.7)	1.2	2.7	0.0096
AT〇SEPT11〇ID〇069618	0.53	(0.34-0.81)	0.34	0.81	0.0033
AT〇ILF2〇ID〇007753	0.5	(0.33-0.78)	0.33	0.78	0.0022
AA〇NUPR1〇ID〇035751	1.6	(1.1-2.5)	1.1	2.5	0.021
ES〇TMCO3〇ID〇026380	0.62	(0.4-0.95)	0.4	0.95	0.029
AT〇ILF2〇ID〇007754	2.1	(1.3-3.2)	1.3	3.2	0.00099
AP〇SLC7A8〇ID〇026711	1.6	(1-2.4)	1	2.4	0.033
AT〇FUBP1〇ID〇003543	1.8	(1.2-2.7)	1.2	2.7	0.0086
AT〇FUBP1〇ID〇003542	0.56	(0.37-0.86)	0.37	0.86	0.0086
AD〇COX4I1〇ID〇037909	0.48	(0.31-0.74)	0.31	0.74	0.00097
ES〇TYMS〇ID〇044457	1.6	(1.1-2.4)	1.1	2.4	0.028
AT〇C17orf104〇ID〇041879	0.63	(0.41-0.97)	0.41	0.97	0.034
AT〇C17orf104〇ID〇041878	1.6	(1-2.4)	1	2.4	0.034
ES〇DTX3〇ID〇022662	1.5	(1-2.3)	1	2.3	0.048
AP〇COQ10A〇ID〇022414	1.6	(1.1-2.5)	1.1	2.5	0.021
ES〇TOM1L1〇ID〇042556	2	(1.3-3.3)	1.3	3.3	0.004
ME〇STEAP3〇ID〇095656	0.62	(0.4-0.94)	0.4	0.94	0.026
AP〇SLC29A1〇ID〇076356	1.9	(1.2-2.8)	1.2	2.8	0.004
AP〇DGKZ〇ID〇015542	0.6	(0.39-0.93)	0.39	0.93	0.021
AT〇KLHL5〇ID〇069042	1.7	(1.1-2.7)	1.1	2.7	0.012
AT〇CD58〇ID〇004361	1.8	(1.2-2.7)	1.2	2.7	0.008
ES〇PLEKHA3〇ID〇056176	0.62	(0.4-0.94)	0.4	0.94	0.026
AT〇GK5〇ID〇067106	1.6	(1-2.4)	1	2.4	0.034
AT〇GK5〇ID〇067105	0.64	(0.42-0.97)	0.42	0.97	0.034
AD〇POLL〇ID〇012887	1.8	(1.2-2.7)	1.2	2.7	0.006
AP〇HYLS1〇ID〇019362	1.8	(1.2-2.7)	1.2	2.7	0.0075
AP〇TRIM34〇ID〇014067	1.7	(1.1-2.6)	1.1	2.6	0.014
AP〇TRIM34〇ID〇014068	0.59	(0.39-0.9)	0.39	0.9	0.014
AP〇SLC29A1〇ID〇076359	0.5	(0.33-0.77)	0.33	0.77	0.0016
ES〇QDPR〇ID〇068856	0.61	(0.4-0.93)	0.4	0.93	0.021
AD〇EMC10〇ID〇051202	0.57	(0.37-0.87)	0.37	0.87	0.009
AP〇UNKL〇ID〇033077	1.8	(1.1-2.9)	1.1	2.9	0.023
AP〇UNKL〇ID〇033078	0.53	(0.32-0.88)	0.32	0.88	0.014
ES〇AP2S1〇ID〇050606	0.62	(0.41-0.94)	0.41	0.94	0.023
ES〇ITGB2〇ID〇060853	0.61	(0.4-0.92)	0.4	0.92	0.02
RI〇SMIM7〇ID〇048187	0.63	(0.41-0.95)	0.41	0.95	0.029
AD〇MDK〇ID〇015573	2	(1.3-3)	1.3	3	0.002
AP〇LIMS1〇ID〇054885	1.8	(1.2-2.7)	1.2	2.7	0.0075
ES〇TNC〇ID〇087348	1.7	(1.1-2.6)	1.1	2.6	0.015
AP〇SRSF11〇ID〇003373	0.61	(0.4-0.94)	0.4	0.94	0.023
AT〇PAXIP1_AS2〇ID〇082429	0.65	(0.43-0.99)	0.43	0.99	0.043
ES〇ARPC4〇ID〇063182	1.5	(1-2.3)	1	2.3	0.042
AT〇FADS2〇ID〇016293	1.5	(1-2.3)	1	2.3	0.043
ES〇DAZAP1〇ID〇046477	2	(1.3-3.3)	1.3	3.3	0.0037
ES〇TACC1〇ID〇083470	2.1	(1.2-3.5)	1.2	3.5	0.0066
AP〇AMPD3〇ID〇014345	1.6	(1-2.5)	1	2.5	0.045
AT〇C3orf67〇ID〇065476	1.5	(1-2.3)	1	2.3	0.048
AT〇SERPINH1〇ID〇017869	1.6	(1-2.5)	1	2.5	0.038
AT〇SERPINH1〇ID〇017870	0.63	(0.41-0.99)	0.41	0.99	0.043
AD〇PPP1R8〇ID〇001347	1.9	(1.2-2.9)	1.2	2.9	0.0028
ES〇POLM〇ID〇079450	1.7	(1.1-2.6)	1.1	2.6	0.028
AP〇PPFIBP2〇ID〇014201	0.57	(0.37-0.88)	0.37	0.88	0.012
AT〇C2orf43〇ID〇052783	1.7	(1.1-2.6)	1.1	2.6	0.011
AP〇SH3BGR〇ID〇060637	1.8	(1.1-2.8)	1.1	2.8	0.014
AP〇SH3BGR〇ID〇060639	0.56	(0.35-0.89)	0.35	0.89	0.014
ES〇C1orf43〇ID〇007800	0.63	(0.42-0.96)	0.42	0.96	0.031
AP〇SYNPO〇ID〇074100	0.61	(0.39-0.97)	0.39	0.97	0.037
AT〇TMEM108〇ID〇066828	1.8	(1.2-2.8)	1.2	2.8	0.0039
AT〇TMEM108〇ID〇066827	0.54	(0.36-0.82)	0.36	0.82	0.0039
ES〇MLPH〇ID〇058118	0.48	(0.31-0.74)	0.31	0.74	0.00085
AA〇PGBD2〇ID〇010573	2.3	(1.5-3.5)	1.5	3.5	0.00014
RI〇UQCRB〇ID〇084610	0.59	(0.38-0.91)	0.38	0.91	0.017
AT〇PHLDB2〇ID〇066062	0.45	(0.29-0.69)	0.29	0.69	0.00028
AT〇PDCD6〇ID〇071425	0.66	(0.43-1)	0.43	1	0.049
RI〇C15orf48〇ID〇030426	0.66	(0.43-0.99)	0.43	0.99	0.046
AD〇UBAC2〇ID〇026181	1.7	(1.1-2.6)	1.1	2.6	0.016
AA〇BRPF1〇ID〇063156	1.7	(1.1-2.6)	1.1	2.6	0.025
ES〇ZNF846〇ID〇047402	1.5	(1-2.3)	1	2.3	0.048
RI〇PHF6〇ID〇090149	0.64	(0.42-0.97)	0.42	0.97	0.037
RI〇WDR62〇ID〇049339	0.62	(0.41-0.94)	0.41	0.94	0.024
AT〇RBM43〇ID〇055565	1.5	(1-2.3)	1	2.3	0.046
AT〇RBM43〇ID〇055566	0.66	(0.43-0.99)	0.43	0.99	0.046
AD〇MAN2A2〇ID〇032514	1.5	(1-2.3)	1	2.3	0.048
RI〇TLE2〇ID〇046654	1.6	(1-2.4)	1	2.4	0.039
AP〇RPL27〇ID〇041171	0.58	(0.38-0.89)	0.38	0.89	0.012
AP〇DHCR24〇ID〇003178	1.7	(1.1-2.6)	1.1	2.6	0.012
AP〇DHCR24〇ID〇003179	0.59	(0.39-0.89)	0.39	0.89	0.012
ES〇CSDE1〇ID〇004336	0.61	(0.4-0.93)	0.4	0.93	0.02
RI〇TGOLN2〇ID〇054196	0.43	(0.28-0.67)	0.28	0.67	0.00016
AP〇MAST4〇ID〇072279	1.6	(1-2.4)	1	2.4	0.042
ES〇ANK3〇ID〇011849	1.7	(1.1-2.6)	1.1	2.6	0.018
AD〇AKT1S1〇ID〇051112	0.54	(0.36-0.82)	0.36	0.82	0.0042
AP〇C7orf55_LUC7L2〇ID〇081953	1.5	(1-2.3)	1	2.3	0.047
AP〇MTPAP〇ID〇011119	0.61	(0.4-0.94)	0.4	0.94	0.027
AP〇MTPAP〇ID〇011118	1.6	(1.1-2.5)	1.1	2.5	0.027
ES〇POSTN〇ID〇025675	0.66	(0.43-1)	0.43	1	0.048
AT〇TRNT1〇ID〇062974	0.59	(0.39-0.89)	0.39	0.89	0.013
AD〇MRPL2〇ID〇076240	0.64	(0.42-0.97)	0.42	0.97	0.038
AP〇C14orf159〇ID〇028835	1.6	(1-2.4)	1	2.4	0.039
ES〇ARHGEF6〇ID〇090216	1.6	(1-2.4)	1	2.4	0.033
AP〇ASH2L〇ID〇083369	0.64	(0.43-0.98)	0.43	0.98	0.038
ES〇RNF7〇ID〇067075	1.5	(1-2.3)	1	2.3	0.04
ES〇CD46〇ID〇009652	1.5	(1-2.3)	1	2.3	0.04
RI〇OTUD5〇ID〇089046	0.58	(0.38-0.88)	0.38	0.88	0.011
ES〇SOD2〇ID〇078308	1.6	(1.1-2.4)	1.1	2.4	0.027
ES〇FXYD3〇ID〇049046	1.5	(1-2.3)	1	2.3	0.047
ES〇FBLN5〇ID〇028894	0.54	(0.35-0.85)	0.35	0.85	0.0075
AP〇RNF145〇ID〇074404	0.66	(0.44-0.99)	0.44	0.99	0.047
AP〇TMCO1〇ID〇008806	1.7	(1.1-2.6)	1.1	2.6	0.012
AP〇TMCO1〇ID〇008805	0.62	(0.41-0.94)	0.41	0.94	0.023
AP〇PRKAG2〇ID〇082385	0.61	(0.4-0.93)	0.4	0.93	0.022
RI〇VAMP4〇ID〇008994	0.64	(0.42-0.97)	0.42	0.97	0.034
AT〇FLAD1〇ID〇007865	1.5	(1-2.3)	1	2.3	0.049
AP〇PDPR〇ID〇037329	1.6	(1.1-2.4)	1.1	2.4	0.028
AP〇DBNDD2〇ID〇059534	0.59	(0.38-0.91)	0.38	0.91	0.017
AT〇SNED1〇ID〇058306	1.5	(1-2.3)	1	2.3	0.04
AT〇SNED1〇ID〇058307	0.65	(0.43-0.98)	0.43	0.98	0.04
ES〇ST7〇ID〇081569	0.63	(0.42-0.96)	0.42	0.96	0.031
AT〇ZNF131〇ID〇071922	1.6	(1-2.4)	1	2.4	0.038
AT〇ZNF131〇ID〇071923	0.64	(0.42-0.98)	0.42	0.98	0.038

## Sheet: MALE_LUSC
ID	HR	95% CI	HR.confint.lower	HR.confint.upper	p.value
AP〇HYAL1〇ID〇064993	0.6	(0.44-0.83)	0.44	0.83	0.0022
AP〇HYAL1〇ID〇064992	1.6	(1.1-2.2)	1.1	2.2	0.005
AT〇SEPT8〇ID〇073300	1.7	(1.3-2.4)	1.3	2.4	0.00084
AT〇SEPT8〇ID〇073299	0.56	(0.41-0.77)	0.41	0.77	0.0004
AP〇SULT1A3〇ID〇094132	1.5	(1.1-2)	1.1	2	0.022
ES〇CTNND1〇ID〇015999	1.4	(1-1.9)	1	1.9	0.039
AP〇RAB3IP〇ID〇023343	0.68	(0.49-0.93)	0.49	0.93	0.018
AP〇MACROD2〇ID〇058714	1.7	(1.2-2.3)	1.2	2.3	0.0019
AT〇JAM2〇ID〇060254	0.71	(0.52-0.98)	0.52	0.98	0.039
AT〇JAM2〇ID〇060253	1.4	(1-1.9)	1	1.9	0.039
ES〇SPAG9〇ID〇042494	1.4	(1-2)	1	2	0.029
ES〇CAST〇ID〇072863	1.4	(1-1.9)	1	1.9	0.046
AT〇PADI4〇ID〇000852	0.72	(0.52-0.99)	0.52	0.99	0.042
AT〇PADI4〇ID〇000851	1.4	(1-1.9)	1	1.9	0.044
AP〇MACROD2〇ID〇058715	0.69	(0.5-0.94)	0.5	0.94	0.021
ES〇ARHGEF11〇ID〇008338	1.7	(1.3-2.4)	1.3	2.4	0.00086
AP〇UVRAG〇ID〇017878	0.7	(0.51-0.97)	0.51	0.97	0.03
AT〇SEPT11〇ID〇069616	0.66	(0.48-0.92)	0.48	0.92	0.013
ES〇TSC2〇ID〇033193	0.66	(0.48-0.9)	0.48	0.9	0.0097
AT〇SEPT11〇ID〇069618	1.6	(1.2-2.2)	1.2	2.2	0.0034
AP〇SLC29A1〇ID〇076359	1.4	(1-2)	1	2	0.029
ES〇CC2D2A〇ID〇068809	0.67	(0.49-0.93)	0.49	0.93	0.017
AT〇C8orf34〇ID〇084099	1.4	(1-1.9)	1	1.9	0.037
ES〇SMARCC2〇ID〇022393	1.6	(1.2-2.2)	1.2	2.2	0.0044
ES〇TMEM184B〇ID〇062226	1.5	(1.1-2.1)	1.1	2.1	0.0091
AP〇SLC29A1〇ID〇076356	0.7	(0.51-0.97)	0.51	0.97	0.031
AT〇JUP〇ID〇040931	0.72	(0.52-0.99)	0.52	0.99	0.045
ME〇H2AFY〇ID〇096931	0.61	(0.44-0.84)	0.44	0.84	0.0022
AP〇SGK1〇ID〇077772	1.5	(1.1-2.1)	1.1	2.1	0.011
ES〇CDC42SE1〇ID〇007556	1.5	(1.1-2.1)	1.1	2.1	0.014
AP〇ACIN1〇ID〇026701	1.5	(1.1-2.1)	1.1	2.1	0.012
AP〇ACIN1〇ID〇026702	0.66	(0.48-0.92)	0.48	0.92	0.012
AT〇RASEF〇ID〇086677	1.5	(1.1-2.1)	1.1	2.1	0.012
AT〇RASEF〇ID〇086676	0.68	(0.49-0.93)	0.49	0.93	0.017
AA〇FBXO7〇ID〇061936	0.72	(0.52-0.99)	0.52	0.99	0.043
ES〇COL6A3〇ID〇058104	0.71	(0.51-0.97)	0.51	0.97	0.034
AP〇RAB3IP〇ID〇023345	1.4	(1-2)	1	2	0.033
AP〇IL1RN〇ID〇055030	1.5	(1.1-2)	1.1	2	0.023
AP〇SP140L〇ID〇057884	0.62	(0.45-0.86)	0.45	0.86	0.0045
AP〇SP140L〇ID〇057885	1.6	(1.2-2.2)	1.2	2.2	0.0044
AP〇ARHGEF25〇ID〇022664	1.4	(1-2)	1	2	0.024
AP〇ARHGEF25〇ID〇022665	0.7	(0.51-0.97)	0.51	0.97	0.032
AA〇USHBP1〇ID〇048246	0.7	(0.51-0.97)	0.51	0.97	0.033
AT〇SERF1B〇ID〇072405	1.6	(1.1-2.2)	1.1	2.2	0.0057
AP〇IL1RN〇ID〇055028	0.71	(0.52-0.98)	0.52	0.98	0.039
AT〇BTNL9〇ID〇075037	1.5	(1.1-2)	1.1	2	0.017
AT〇ZFP64〇ID〇059813	1.4	(1-1.9)	1	1.9	0.048
ES〇TEAD2〇ID〇050921	1.6	(1.2-2.2)	1.2	2.2	0.0044
AT〇SERF1A〇ID〇072416	1.7	(1.2-2.3)	1.2	2.3	0.0024
RI〇ANKRD65〇ID〇000170	0.72	(0.52-0.99)	0.52	0.99	0.045
AT〇PSIP1〇ID〇085920	0.72	(0.52-0.99)	0.52	0.99	0.045
AA〇ABHD14B〇ID〇065146	0.69	(0.5-0.95)	0.5	0.95	0.025
AT〇C4BPB〇ID〇009625	1.6	(1.1-2.1)	1.1	2.1	0.0072
AT〇C4BPB〇ID〇009624	0.66	(0.48-0.91)	0.48	0.91	0.011
AP〇SLC1A4〇ID〇053774	1.4	(1-1.9)	1	1.9	0.039
AP〇SLC1A4〇ID〇053775	0.7	(0.51-0.97)	0.51	0.97	0.03
AT〇SERF1B〇ID〇072403	0.65	(0.47-0.89)	0.47	0.89	0.0083
AP〇PPP2R4〇ID〇087833	0.72	(0.52-0.99)	0.52	0.99	0.044
AT〇PECR〇ID〇057400	1.4	(1-1.9)	1	1.9	0.037
AT〇PECR〇ID〇057399	0.7	(0.51-0.96)	0.51	0.96	0.028
AT〇KLC1〇ID〇029467	1.5	(1.1-2)	1.1	2	0.019
ES〇GPR116〇ID〇076429	0.6	(0.43-0.84)	0.43	0.84	0.0028
AP〇TNPO2〇ID〇047845	1.5	(1.1-2)	1.1	2	0.018
AD〇STRA6〇ID〇031688	0.62	(0.45-0.86)	0.45	0.86	0.0041
AT〇SERF1A〇ID〇072415	0.6	(0.44-0.84)	0.44	0.84	0.0024
AP〇HIGD1B〇ID〇041896	1.8	(1.3-2.6)	1.3	2.6	0.0011
AP〇HIGD1B〇ID〇041897	0.6	(0.42-0.86)	0.42	0.86	0.005
AT〇PPFIA1〇ID〇017393	1.4	(1-1.9)	1	1.9	0.035
AT〇PPFIA1〇ID〇017392	0.72	(0.52-1)	0.52	1	0.047
ES〇NPNT〇ID〇070261	1.4	(1-2)	1	2	0.035
AP〇UBA1〇ID〇088907	0.7	(0.51-0.96)	0.51	0.96	0.028
AT〇ATP9B〇ID〇046232	1.5	(1.1-2.1)	1.1	2.1	0.011
AT〇ATP9B〇ID〇046230	0.66	(0.48-0.91)	0.48	0.91	0.01
AT〇GALK1〇ID〇043493	0.71	(0.51-0.97)	0.51	0.97	0.033
AT〇GALK1〇ID〇043494	1.4	(1-2)	1	2	0.032
ES〇PPP3CA〇ID〇070093	1.4	(1-1.9)	1	1.9	0.033
ES〇ISCU〇ID〇024244	0.61	(0.44-0.84)	0.44	0.84	0.0027
AP〇ARHGAP24〇ID〇069815	1.4	(1-1.9)	1	1.9	0.043
AP〇SLC19A1〇ID〇060877	1.4	(1-2)	1	2	0.034
AP〇COLEC11〇ID〇052578	1.5	(1-2.1)	1	2.1	0.026
AT〇AZI2〇ID〇063793	0.58	(0.42-0.81)	0.42	0.81	0.0011
AT〇AZI2〇ID〇063794	1.7	(1.2-2.4)	1.2	2.4	0.00094
ES〇ADIRF〇ID〇012443	1.6	(1.1-2.2)	1.1	2.2	0.0059
ES〇TTC7B〇ID〇028826	1.4	(1-1.9)	1	1.9	0.038
AP〇HMHA1〇ID〇046370	1.7	(1.2-2.4)	1.2	2.4	0.00099
ES〇RCC1〇ID〇001388	1.5	(1.1-2.1)	1.1	2.1	0.01
AT〇SIMC1〇ID〇074636	1.4	(1-1.9)	1	1.9	0.04
AT〇SIMC1〇ID〇074635	0.72	(0.53-1)	0.53	1	0.049
AP〇RBM47〇ID〇069089	1.6	(1.2-2.2)	1.2	2.2	0.0032
AP〇PID1〇ID〇057838	1.7	(1.1-2.6)	1.1	2.6	0.0091
ES〇CAST〇ID〇196583	1.4	(1-2)	1	2	0.031
AT〇FANCA〇ID〇038142	0.66	(0.48-0.9)	0.48	0.9	0.01
AT〇FANCA〇ID〇038143	1.5	(1.1-2.1)	1.1	2.1	0.0086
RI〇TMUB2〇ID〇041791	0.7	(0.5-0.96)	0.5	0.96	0.026
AT〇KLC1〇ID〇029468	0.62	(0.45-0.85)	0.45	0.85	0.0031
AP〇CCDC14〇ID〇066486	1.5	(1.1-2)	1.1	2	0.018
AP〇CCDC14〇ID〇066487	0.7	(0.51-0.97)	0.51	0.97	0.033
ES〇HM13〇ID〇058892	1.4	(1-2)	1	2	0.035
AP〇UVRAG〇ID〇017880	1.6	(1.1-2.1)	1.1	2.1	0.0076
ES〇MEGF6〇ID〇000315	1.4	(1-2)	1	2	0.031
AT〇NPM1〇ID〇074520	0.69	(0.5-0.95)	0.5	0.95	0.024
AT〇NPM1〇ID〇074519	1.5	(1.1-2)	1.1	2	0.018
ES〇GNB1〇ID〇000231	0.71	(0.51-0.98)	0.51	0.98	0.035
AP〇SLC44A2〇ID〇047559	0.72	(0.52-0.99)	0.52	0.99	0.044
AP〇SLC44A2〇ID〇047558	1.4	(1-1.9)	1	1.9	0.04
AT〇AP1S2〇ID〇088571	1.4	(1-1.9)	1	1.9	0.034
AT〇AP1S2〇ID〇088569	0.71	(0.52-0.98)	0.52	0.98	0.038
AT〇PHACTR1〇ID〇075368	1.7	(1.2-2.4)	1.2	2.4	0.0014
ES〇AFMID〇ID〇043795	1.4	(1-1.9)	1	1.9	0.048
AP〇AES〇ID〇046657	1.4	(1-1.9)	1	1.9	0.047
AP〇RABEP2〇ID〇035888	0.71	(0.52-0.98)	0.52	0.98	0.039
AP〇RABEP2〇ID〇035889	1.4	(1.1-2)	1.1	2	0.024
AD〇GTF3C1〇ID〇035695	1.5	(1.1-2.1)	1.1	2.1	0.015
AP〇CDYL〇ID〇075231	2.2	(1.6-3.1)	1.6	3.1	2.2e-06
ES〇G6PC3〇ID〇041762	1.4	(1-1.9)	1	1.9	0.047
AD〇RPL15〇ID〇063732	0.73	(0.53-1)	0.53	1	0.049
AT〇FMO5〇ID〇007367	0.7	(0.51-0.97)	0.51	0.97	0.03
AT〇C9orf3〇ID〇086945	0.63	(0.45-0.86)	0.45	0.86	0.0043
ME〇DNM2〇ID〇047588	0.71	(0.51-0.97)	0.51	0.97	0.033
AP〇CDYL〇ID〇075229	0.48	(0.34-0.66)	0.34	0.66	9e-06
ES〇SMARCC2〇ID〇022392	0.67	(0.48-0.94)	0.48	0.94	0.02
ES〇TNNT1〇ID〇052026	1.5	(1.1-2.1)	1.1	2.1	0.025
ES〇LPIN1〇ID〇052712	1.5	(1-2.1)	1	2.1	0.03
AP〇ZFP64〇ID〇059807	0.66	(0.48-0.91)	0.48	0.91	0.011
AT〇UPB1〇ID〇061403	0.69	(0.5-0.95)	0.5	0.95	0.025
AT〇UPB1〇ID〇061404	1.4	(1-2)	1	2	0.031
AP〇WRB〇ID〇060627	0.61	(0.44-0.84)	0.44	0.84	0.0029
AP〇WRB〇ID〇060626	1.6	(1.2-2.3)	1.2	2.3	0.0028
AP〇RNF145〇ID〇074403	1.4	(1-2)	1	2	0.026
AP〇TUBB3〇ID〇038167	1.4	(1-2)	1	2	0.03
ES〇MYL6〇ID〇022384	1.4	(1-2)	1	2	0.031
AP〇PKM〇ID〇031505	1.7	(1.2-2.3)	1.2	2.3	0.0012
ES〇BPTF〇ID〇043117	1.4	(1-2)	1	2	0.035
AT〇NUPL2〇ID〇078961	0.68	(0.49-0.93)	0.49	0.93	0.018
AT〇NUPL2〇ID〇078960	1.4	(1-1.9)	1	1.9	0.036
AP〇TUBB3〇ID〇038166	0.7	(0.51-0.97)	0.51	0.97	0.033
AP〇COLEC11〇ID〇052579	0.65	(0.46-0.92)	0.46	0.92	0.015
AA〇TCF3〇ID〇046538	0.7	(0.51-0.97)	0.51	0.97	0.03
ES〇CD44〇ID〇015131	0.72	(0.52-0.99)	0.52	0.99	0.045
AT〇SLC35G1〇ID〇012567	1.9	(1.3-2.6)	1.3	2.6	0.00021
ES〇CARD8〇ID〇050720	0.71	(0.51-0.98)	0.51	0.98	0.037
AA〇DDX49〇ID〇048531	0.65	(0.47-0.9)	0.47	0.9	0.0087
AP〇FAM134B〇ID〇071598	0.62	(0.43-0.89)	0.43	0.89	0.0095
AP〇FAM134B〇ID〇071599	1.7	(1.2-2.4)	1.2	2.4	0.006
ES〇MXRA7〇ID〇043613	1.4	(1-1.9)	1	1.9	0.039
AT〇MAZ〇ID〇035941	1.5	(1.1-2)	1.1	2	0.02
AT〇MAZ〇ID〇035940	0.68	(0.49-0.93)	0.49	0.93	0.017
AT〇PPP2R1B〇ID〇018674	1.4	(1-2)	1	2	0.03
AT〇PPP2R1B〇ID〇018672	0.69	(0.5-0.95)	0.5	0.95	0.023
AT〇SLC35G1〇ID〇012570	0.62	(0.45-0.86)	0.45	0.86	0.0043
AD〇LANCL1〇ID〇057277	1.4	(1-2)	1	2	0.025
AP〇HMHA1〇ID〇046375	0.66	(0.48-0.91)	0.48	0.91	0.012
AP〇SOCS2〇ID〇023706	0.59	(0.43-0.82)	0.43	0.82	0.0015
RI〇FXYD3〇ID〇049039	0.67	(0.48-0.92)	0.48	0.92	0.014
AA〇ALS2CL〇ID〇064464	0.63	(0.45-0.89)	0.45	0.89	0.008
AP〇MGAT1〇ID〇075018	1.5	(1.1-2)	1.1	2	0.02
AP〇VPS9D1〇ID〇038130	0.63	(0.46-0.87)	0.46	0.87	0.0045
AP〇VPS9D1〇ID〇038131	1.6	(1.2-2.2)	1.2	2.2	0.0036
ES〇LMAN2L〇ID〇054569	1.6	(1.1-2.2)	1.1	2.2	0.0078
ES〇NT5C2〇ID〇012992	1.4	(1-2)	1	2	0.032
ES〇DNM2〇ID〇047587	0.63	(0.46-0.87)	0.46	0.87	0.0054
AA〇LMO7〇ID〇026065	1.4	(1-1.9)	1	1.9	0.04
AP〇NEK6〇ID〇087524	1.6	(1.1-2.2)	1.1	2.2	0.0062
AD〇TLE3〇ID〇031418	0.72	(0.52-1)	0.52	1	0.048
ES〇CTAGE5〇ID〇027377	1.5	(1.1-2.1)	1.1	2.1	0.013
AA〇CYB561D2〇ID〇065052	0.6	(0.43-0.84)	0.43	0.84	0.0027
AP〇VGLL4〇ID〇063390	1.6	(1.1-2.1)	1.1	2.1	0.0073
AT〇C12orf76〇ID〇024406	0.69	(0.5-0.95)	0.5	0.95	0.023
AD〇RPLP0〇ID〇024737	0.71	(0.52-0.98)	0.52	0.98	0.039
ES〇SNRPC〇ID〇075790	0.66	(0.48-0.91)	0.48	0.91	0.012
ES〇RFXANK〇ID〇048608	1.4	(1-2)	1	2	0.034
AT〇ZNF66〇ID〇048730	0.65	(0.47-0.89)	0.47	0.89	0.0083
AT〇TMEM108〇ID〇066827	1.5	(1.1-2.1)	1.1	2.1	0.014
AT〇TMEM108〇ID〇066828	0.68	(0.49-0.93)	0.49	0.93	0.018
AT〇SLC13A3〇ID〇059696	0.71	(0.52-0.98)	0.52	0.98	0.036
ES〇KRTCAP3〇ID〇053016	1.6	(1.1-2.2)	1.1	2.2	0.0057
ES〇TOP1MT〇ID〇085418	1.5	(1.1-2.1)	1.1	2.1	0.0096
AT〇CD300LG〇ID〇041725	1.8	(1.2-2.7)	1.2	2.7	0.0036
AD〇WDYHV1〇ID〇085066	1.4	(1-1.9)	1	1.9	0.039
ES〇LSM14B〇ID〇095990	1.4	(1-2)	1	2	0.027
AD〇ZNF23〇ID〇037444	0.63	(0.45-0.87)	0.45	0.87	0.0049
AT〇CLIP4〇ID〇053088	0.69	(0.5-0.96)	0.5	0.96	0.026
ES〇C16orf13〇ID〇265880	1.4	(1-2)	1	2	0.047
AT〇CLIP4〇ID〇053087	1.4	(1.1-2)	1.1	2	0.024
AP〇DYSF〇ID〇053934	1.5	(1.1-2.2)	1.1	2.2	0.015
AP〇DYSF〇ID〇053935	0.65	(0.46-0.92)	0.46	0.92	0.015
AP〇FBXO18〇ID〇010670	1.4	(1-2)	1	2	0.025
AP〇S100A13〇ID〇007731	1.4	(1-2)	1	2	0.03
AA〇FAM63A〇ID〇007539	1.5	(1.1-2)	1.1	2	0.022
ES〇SLC37A2〇ID〇019257	1.5	(1.1-2)	1.1	2	0.021
ES〇SORBS1〇ID〇012636	0.67	(0.47-0.97)	0.47	0.97	0.032
AP〇CABIN1〇ID〇061388	0.51	(0.37-0.71)	0.37	0.71	5.9e-05
ME〇TPM2〇ID〇086278	1.4	(1-2)	1	2	0.025
AT〇GCOM1〇ID〇030799	1.5	(1-2.1)	1	2.1	0.027
AP〇PTCD1〇ID〇080625	1.4	(1-1.9)	1	1.9	0.042
AP〇HGSNAT〇ID〇083759	1.5	(1.1-2)	1.1	2	0.023
AP〇HGSNAT〇ID〇083760	0.67	(0.49-0.93)	0.49	0.93	0.015
AP〇OLFM1〇ID〇088099	0.63	(0.45-0.88)	0.45	0.88	0.0068
AP〇OLFM1〇ID〇088097	1.6	(1.1-2.2)	1.1	2.2	0.0087
AT〇COX19〇ID〇078556	1.4	(1-1.9)	1	1.9	0.036
AT〇COX19〇ID〇078557	0.72	(0.53-1)	0.53	1	0.047
AT〇LARP6〇ID〇031442	1.9	(1.4-2.7)	1.4	2.7	6e-05
AT〇LARP6〇ID〇031443	0.52	(0.38-0.72)	0.38	0.72	8.4e-05
AT〇MAPKAP1〇ID〇087578	0.72	(0.52-0.99)	0.52	0.99	0.046
AT〇MAPKAP1〇ID〇087579	1.4	(1-2)	1	2	0.04
AT〇GCOM1〇ID〇030798	0.65	(0.46-0.91)	0.46	0.91	0.013
ES〇FRMD8〇ID〇016850	1.4	(1-2)	1	2	0.024
AT〇CDH23〇ID〇012058	0.7	(0.51-0.96)	0.51	0.96	0.027
RI〇CCNDBP1〇ID〇030218	0.7	(0.51-0.98)	0.51	0.98	0.036
AP〇MYO1C〇ID〇038309	1.5	(1.1-2.1)	1.1	2.1	0.011
AT〇C5orf38〇ID〇071502	1.4	(1-2)	1	2	0.025
AP〇SCGB3A2〇ID〇073966	0.71	(0.51-0.97)	0.51	0.97	0.033
AP〇SCGB3A2〇ID〇073965	1.5	(1.1-2)	1.1	2	0.022
ES〇NAV2〇ID〇014700	1.5	(1.1-2.2)	1.1	2.2	0.019
RI〇PSMD11〇ID〇040209	1.5	(1.1-2)	1.1	2	0.019
AP〇PXN〇ID〇024742	1.5	(1.1-2)	1.1	2	0.019
AP〇UBE2V2〇ID〇083797	1.4	(1-2)	1	2	0.038
AP〇UBE2V2〇ID〇083796	0.69	(0.5-0.96)	0.5	0.96	0.028
AP〇GGT1〇ID〇061425	0.63	(0.45-0.87)	0.45	0.87	0.0053
AP〇ATP1A1〇ID〇004358	1.4	(1-1.9)	1	1.9	0.032
AA〇RPL32〇ID〇063472	1.4	(1-2)	1	2	0.024
AP〇PBX3〇ID〇087588	0.72	(0.52-0.99)	0.52	0.99	0.044
ES〇MYL6〇ID〇022378	0.71	(0.52-0.97)	0.52	0.97	0.034
AP〇ERG〇ID〇060588	0.65	(0.44-0.94)	0.44	0.94	0.022
AP〇DCAKD〇ID〇041928	1.4	(1-2)	1	2	0.03
ES〇SEPT15〇ID〇003687	1.5	(1.1-2)	1.1	2	0.018
AA〇METTL15〇ID〇014787	1.7	(1.2-2.4)	1.2	2.4	0.0013
AP〇PRKAB1〇ID〇024704	0.61	(0.44-0.84)	0.44	0.84	0.0028
AP〇PRKAB1〇ID〇024705	1.6	(1.2-2.2)	1.2	2.2	0.0044
AP〇FOXJ3〇ID〇002067	0.72	(0.52-0.99)	0.52	0.99	0.045
AA〇TMEM161A〇ID〇048589	0.67	(0.49-0.93)	0.49	0.93	0.018
AP〇PKM〇ID〇031506	0.68	(0.49-0.93)	0.49	0.93	0.017
ES〇CLEC16A〇ID〇034005	0.66	(0.47-0.93)	0.47	0.93	0.017
AD〇ARL6IP4〇ID〇025037	1.7	(1.2-2.5)	1.2	2.5	0.002
ES〇CAST〇ID〇072861	1.5	(1.1-2.1)	1.1	2.1	0.013
AP〇SULT1A4〇ID〇094111	0.67	(0.48-0.94)	0.48	0.94	0.022
ES〇SMARCA4〇ID〇047612	1.4	(1-1.9)	1	1.9	0.036
AT〇SLMAP〇ID〇065391	1.4	(1-2)	1	2	0.031
AP〇SULT1A1〇ID〇035815	0.69	(0.5-0.95)	0.5	0.95	0.024
AT〇RNF220〇ID〇002558	0.71	(0.51-0.97)	0.51	0.97	0.034
ES〇BCAS4〇ID〇059783	1.5	(1.1-2.1)	1.1	2.1	0.019
ES〇AFMID〇ID〇043804	1.4	(1-2)	1	2	0.024
AP〇CAPN1〇ID〇016799	0.58	(0.42-0.81)	0.42	0.81	0.0012
RI〇DNPH1〇ID〇076257	0.7	(0.51-0.96)	0.51	0.96	0.026
AP〇FAM122C〇ID〇090161	1.4	(1-2)	1	2	0.049
AT〇CYP19A1〇ID〇030613	1.8	(1.3-2.6)	1.3	2.6	0.0013
AT〇CYP19A1〇ID〇030612	0.56	(0.39-0.79)	0.39	0.79	0.0013
ES〇ARHGAP17〇ID〇035664	1.4	(1-1.9)	1	1.9	0.038
AT〇EFCAB11〇ID〇028797	0.72	(0.52-0.99)	0.52	0.99	0.042
ES〇PARP6〇ID〇031525	1.4	(1-2)	1	2	0.028
AT〇ZNF66〇ID〇048728	1.5	(1.1-2)	1.1	2	0.02
AP〇TMEM64〇ID〇084415	1.5	(1-2.1)	1	2.1	0.043
ES〇DDX52〇ID〇040542	0.71	(0.51-0.97)	0.51	0.97	0.033
AP〇LRP2BP〇ID〇071337	1.4	(1-1.9)	1	1.9	0.046
AA〇NUPR1〇ID〇035751	0.69	(0.5-0.96)	0.5	0.96	0.026
AT〇ARPC1A〇ID〇080602	1.8	(1.3-2.5)	1.3	2.5	0.00052
AT〇ARPC1A〇ID〇080601	0.55	(0.4-0.76)	0.4	0.76	0.00034
AA〇GHDC〇ID〇041023	0.65	(0.47-0.89)	0.47	0.89	0.008
ES〇SPNS1〇ID〇035904	1.5	(1.1-2.1)	1.1	2.1	0.015
AT〇ZNF534〇ID〇051463	0.7	(0.51-0.97)	0.51	0.97	0.03
AT〇ZNF534〇ID〇051462	1.4	(1-2)	1	2	0.03
ME〇SLC39A14〇ID〇140283	1.4	(1-1.9)	1	1.9	0.044
AP〇IFITM2〇ID〇013642	1.5	(1.1-2.1)	1.1	2.1	0.0096
AP〇IFITM2〇ID〇013641	0.64	(0.46-0.88)	0.46	0.88	0.0068
ES〇PDLIM2〇ID〇083026	1.4	(1-1.9)	1	1.9	0.048
ES〇CD44〇ID〇015132	0.7	(0.5-0.97)	0.5	0.97	0.033
AT〇ACOXL〇ID〇054941	1.6	(1.2-2.3)	1.2	2.3	0.003
ES〇ITGB4〇ID〇043490	1.5	(1.1-2.1)	1.1	2.1	0.0097
AP〇ARID5B〇ID〇011865	1.4	(1-1.9)	1	1.9	0.049
ES〇SDCCAG8〇ID〇010458	1.4	(1-2)	1	2	0.029
AP〇RPL23A〇ID〇039965	0.72	(0.52-0.99)	0.52	0.99	0.046
ES〇SLC39A4〇ID〇098117	1.7	(1.2-2.3)	1.2	2.3	0.0017
AP〇CACNB3〇ID〇021469	0.71	(0.51-0.97)	0.51	0.97	0.034
ES〇FLOT2〇ID〇040012	0.64	(0.45-0.91)	0.45	0.91	0.013
AP〇ACSL5〇ID〇013111	1.7	(1.2-2.3)	1.2	2.3	0.0021
AT〇KRT222〇ID〇040883	1.4	(1-1.9)	1	1.9	0.048
ES〇TARBP2〇ID〇022072	1.4	(1-1.9)	1	1.9	0.035
AT〇MRPL42〇ID〇023698	0.7	(0.5-0.96)	0.5	0.96	0.026
AP〇IL11RA〇ID〇086209	0.66	(0.48-0.91)	0.48	0.91	0.011
AP〇KDM4C〇ID〇085822	0.58	(0.42-0.8)	0.42	0.8	0.001
AT〇DTNA〇ID〇045097	1.7	(1.2-2.4)	1.2	2.4	0.0014
AT〇CEP63〇ID〇066877	0.7	(0.51-0.97)	0.51	0.97	0.031
AT〇CEP63〇ID〇066878	1.4	(1-2)	1	2	0.029
RI〇NINJ2〇ID〇019608	0.68	(0.49-0.95)	0.49	0.95	0.023
ES〇IL4R〇ID〇035690	0.66	(0.48-0.9)	0.48	0.9	0.0099
ES〇LRP8〇ID〇003058	0.68	(0.49-0.94)	0.49	0.94	0.019
AP〇TENC1〇ID〇021925	1.4	(1-1.9)	1	1.9	0.044
ES〇TANK〇ID〇055744	0.64	(0.47-0.89)	0.47	0.89	0.0069
AP〇KRT18〇ID〇021911	0.64	(0.46-0.89)	0.46	0.89	0.007
AP〇KRT18〇ID〇021912	1.5	(1.1-2.1)	1.1	2.1	0.011
ES〇PGAP2〇ID〇014024	0.68	(0.46-0.99)	0.46	0.99	0.046
AT〇ERLIN2〇ID〇083347	1.6	(1.1-2.2)	1.1	2.2	0.0052
AT〇ERLIN2〇ID〇083348	0.64	(0.46-0.88)	0.46	0.88	0.0065
AD〇ADD1〇ID〇068610	0.64	(0.46-0.88)	0.46	0.88	0.0065
AA〇ILF3〇ID〇047577	1.6	(1.1-2.2)	1.1	2.2	0.0052
AT〇ABCC5〇ID〇067814	0.7	(0.51-0.97)	0.51	0.97	0.03
AP〇S100A13〇ID〇007733	0.69	(0.5-0.95)	0.5	0.95	0.022
AT〇NREP〇ID〇072977	0.71	(0.51-0.98)	0.51	0.98	0.036
ES〇ENDOV〇ID〇044066	1.7	(1.2-2.3)	1.2	2.3	0.002
ES〇TIMM50〇ID〇049835	1.6	(1.1-2.2)	1.1	2.2	0.0064
AT〇ATXN7L1〇ID〇081308	1.5	(1.1-2)	1.1	2	0.021
AP〇SOX7〇ID〇082607	0.64	(0.47-0.89)	0.47	0.89	0.0075
AP〇SOX7〇ID〇082608	1.6	(1.1-2.2)	1.1	2.2	0.0065
AT〇ACOXL〇ID〇054942	0.72	(0.52-0.99)	0.52	0.99	0.046
AP〇NR4A2〇ID〇055613	0.71	(0.51-0.97)	0.51	0.97	0.034
AP〇FMNL1〇ID〇041953	0.7	(0.5-0.98)	0.5	0.98	0.038
AP〇FMNL1〇ID〇041952	1.4	(1-2)	1	2	0.046
AP〇DENND3〇ID〇085325	0.66	(0.48-0.92)	0.48	0.92	0.014
AP〇DENND3〇ID〇085326	1.5	(1.1-2.1)	1.1	2.1	0.014
AP〇CREM〇ID〇011231	1.5	(1.1-2.1)	1.1	2.1	0.014
ES〇RAI14〇ID〇071716	0.72	(0.53-1)	0.53	1	0.049
AP〇IMPDH1〇ID〇081671	0.65	(0.47-0.9)	0.47	0.9	0.0086
AP〇IMPDH1〇ID〇081670	1.5	(1.1-2.1)	1.1	2.1	0.0086
ES〇GPR137〇ID〇016625	1.5	(1.1-2)	1.1	2	0.015
AT〇TRAK2〇ID〇056837	1.7	(1.2-2.3)	1.2	2.3	0.002
AT〇TRAK2〇ID〇056836	0.62	(0.45-0.85)	0.45	0.85	0.0035
ES〇SIGIRR〇ID〇013653	1.7	(1.2-2.5)	1.2	2.5	0.0025
AP〇NR4A2〇ID〇055614	1.5	(1.1-2.1)	1.1	2.1	0.0087
AP〇KCNMB3〇ID〇067678	1.5	(1.1-2.1)	1.1	2.1	0.011
AT〇SLC35E4〇ID〇061791	0.66	(0.47-0.9)	0.47	0.9	0.01
AT〇SLC35E4〇ID〇061792	1.5	(1.1-2.1)	1.1	2.1	0.016
AP〇FAXDC2〇ID〇074222	1.6	(1.1-2.3)	1.1	2.3	0.0068
AT〇SLC35D2〇ID〇086964	1.4	(1-2)	1	2	0.026
AT〇SLC35D2〇ID〇086965	0.7	(0.51-0.96)	0.51	0.96	0.027
AP〇ST3GAL3〇ID〇002194	1.4	(1-2)	1	2	0.033
AP〇ST3GAL3〇ID〇002192	0.67	(0.47-0.94)	0.47	0.94	0.021
ES〇UCK1〇ID〇087957	1.5	(1.1-2)	1.1	2	0.017
AT〇PLCB1〇ID〇058673	0.72	(0.52-0.99)	0.52	0.99	0.043
ES〇ECHDC2〇ID〇003033	0.54	(0.39-0.76)	0.39	0.76	0.0003
AT〇PTS〇ID〇018760	1.4	(1-1.9)	1	1.9	0.049
AT〇DTNA〇ID〇045094	0.71	(0.51-0.99)	0.51	0.99	0.041
AP〇GRB2〇ID〇043438	0.69	(0.5-0.95)	0.5	0.95	0.021
ES〇LGALS3BP〇ID〇234085	0.68	(0.49-0.95)	0.49	0.95	0.025
AT〇VSTM4〇ID〇011498	1.4	(1-2)	1	2	0.033
AT〇VSTM4〇ID〇011499	0.7	(0.51-0.96)	0.51	0.96	0.028
AD〇MFSD11〇ID〇043687	1.4	(1-1.9)	1	1.9	0.047
AT〇C19orf55〇ID〇049287	1.4	(1-2)	1	2	0.03
AT〇C19orf55〇ID〇049288	0.69	(0.5-0.95)	0.5	0.95	0.024
AP〇CEPT1〇ID〇004139	1.7	(1.2-2.3)	1.2	2.3	0.002
AP〇CEPT1〇ID〇004140	0.6	(0.44-0.83)	0.44	0.83	0.002
AP〇KDM4C〇ID〇085823	1.6	(1.2-2.2)	1.2	2.2	0.0044
AA〇CTNNB1〇ID〇064251	0.71	(0.52-0.98)	0.52	0.98	0.037
AD〇WBSCR22〇ID〇080012	0.71	(0.52-0.98)	0.52	0.98	0.037
AP〇NFYC〇ID〇002015	0.72	(0.53-0.99)	0.53	0.99	0.045
ES〇TTC12〇ID〇018779	0.59	(0.42-0.82)	0.42	0.82	0.0016
AP〇RHBDL2〇ID〇001859	1.5	(1.1-2)	1.1	2	0.018
AP〇ARHGEF6〇ID〇090213	0.67	(0.47-0.95)	0.47	0.95	0.026
AP〇DNASE1L1〇ID〇090575	1.6	(1.1-2.2)	1.1	2.2	0.0063
ES〇RNMT〇ID〇044755	0.67	(0.49-0.93)	0.49	0.93	0.017
AT〇NIN〇ID〇027492	1.4	(1-1.9)	1	1.9	0.038
ES〇TNC〇ID〇087349	1.5	(1.1-2.1)	1.1	2.1	0.012
AP〇CD63〇ID〇022242	1.7	(1.2-2.3)	1.2	2.3	0.0015
AT〇UEVLD〇ID〇014667	1.4	(1-2)	1	2	0.032
AT〇UEVLD〇ID〇014666	0.71	(0.51-0.98)	0.51	0.98	0.038
AP〇KIAA0319L〇ID〇001718	1.7	(1.2-2.3)	1.2	2.3	0.0023
ES〇NSFL1C〇ID〇058506	1.4	(1-1.9)	1	1.9	0.044
AP〇INO80C〇ID〇045170	0.7	(0.51-0.97)	0.51	0.97	0.034
AP〇INO80C〇ID〇045169	1.4	(1-1.9)	1	1.9	0.042
AP〇SEC14L1〇ID〇043703	0.7	(0.51-0.97)	0.51	0.97	0.031
AD〇BCS1L〇ID〇057522	0.67	(0.48-0.94)	0.48	0.94	0.02
AP〇CTPS2〇ID〇088575	0.58	(0.42-0.81)	0.42	0.81	0.0012
AD〇VPS28〇ID〇085609	0.64	(0.46-0.88)	0.46	0.88	0.0063
AP〇ATG9A〇ID〇057634	1.4	(1-1.9)	1	1.9	0.043
AP〇ATG9A〇ID〇057635	0.7	(0.51-0.97)	0.51	0.97	0.032
ES〇EEFSEC〇ID〇066643	0.72	(0.53-1)	0.53	1	0.048
AT〇GCOM1〇ID〇030797	1.8	(1.3-2.5)	1.3	2.5	0.0007
AD〇AAGAB〇ID〇031308	1.4	(1-1.9)	1	1.9	0.035
ES〇DNA2〇ID〇011948	0.65	(0.46-0.93)	0.46	0.93	0.02
AT〇SSH2〇ID〇040060	1.5	(1.1-2.1)	1.1	2.1	0.0092
AP〇ARHGEF6〇ID〇090214	1.5	(1.1-2.2)	1.1	2.2	0.016
AP〇DNASE1L1〇ID〇090573	0.58	(0.42-0.8)	0.42	0.8	0.00084
AT〇SYNPO〇ID〇074103	1.4	(1-1.9)	1	1.9	0.033
AT〇SYNPO〇ID〇074104	0.72	(0.52-0.99)	0.52	0.99	0.043
AP〇CIDEB〇ID〇026957	0.65	(0.47-0.9)	0.47	0.9	0.0086
AP〇CIDEB〇ID〇026958	1.5	(1.1-2.1)	1.1	2.1	0.0086
RI〇NEK8〇ID〇039971	1.6	(1.2-2.3)	1.2	2.3	0.0057
ES〇EFCAB4A〇ID〇013776	1.6	(1.2-2.3)	1.2	2.3	0.0045
AP〇ZNF558〇ID〇047261	1.5	(1.1-2.1)	1.1	2.1	0.01
ES〇BCAS4〇ID〇059786	1.5	(1.1-2.1)	1.1	2.1	0.013
ES〇MARCH8〇ID〇011363	0.69	(0.5-0.95)	0.5	0.95	0.021
AP〇GRB2〇ID〇043439	1.5	(1.1-2)	1.1	2	0.02
ES〇MTMR1〇ID〇090354	0.66	(0.48-0.91)	0.48	0.91	0.011
AP〇OXR1〇ID〇084847	1.7	(1.2-2.3)	1.2	2.3	0.0017
ES〇EVI5L〇ID〇047191	1.5	(1.1-2.1)	1.1	2.1	0.0097
AT〇PTPRJ〇ID〇015812	1.4	(1-1.9)	1	1.9	0.034
AT〇PTPRJ〇ID〇015813	0.72	(0.52-0.99)	0.52	0.99	0.04
ES〇CS〇ID〇022418	0.69	(0.5-0.96)	0.5	0.96	0.026
ES〇LRRC23〇ID〇020007	1.5	(1-2)	1	2	0.024
ES〇CCDC115〇ID〇055334	0.68	(0.49-0.94)	0.49	0.94	0.018
AT〇GOLGA3〇ID〇025304	1.4	(1-2)	1	2	0.026
ES〇CAMK2G〇ID〇012241	1.4	(1-1.9)	1	1.9	0.042
AP〇CTPS2〇ID〇088576	1.7	(1.2-2.3)	1.2	2.3	0.0016
ES〇ARHGEF6〇ID〇090216	0.72	(0.52-1)	0.52	1	0.048
AP〇MAP2K3〇ID〇039808	1.6	(1.1-2.2)	1.1	2.2	0.0057
AD〇ROMO1〇ID〇059227	1.4	(1-1.9)	1	1.9	0.041
AT〇ASPH〇ID〇083968	1.4	(1-1.9)	1	1.9	0.044
ES〇GFPT1〇ID〇053846	1.4	(1-1.9)	1	1.9	0.038
ES〇ECHDC2〇ID〇003037	0.58	(0.41-0.81)	0.41	0.81	0.0017
ES〇LTBP4〇ID〇049932	0.69	(0.49-0.97)	0.49	0.97	0.032
AA〇IL32〇ID〇033418	0.72	(0.52-0.99)	0.52	0.99	0.045
ES〇TMUB2〇ID〇041809	0.72	(0.52-0.99)	0.52	0.99	0.043
AP〇RHBDL2〇ID〇001860	0.69	(0.5-0.95)	0.5	0.95	0.024
ES〇PEX2〇ID〇084240	1.4	(1.1-2)	1.1	2	0.024
ES〇PCYT2〇ID〇044229	1.6	(1.1-2.2)	1.1	2.2	0.0053
AP〇ABHD17A〇ID〇046553	0.52	(0.38-0.72)	0.38	0.72	9.9e-05
AP〇ABHD17A〇ID〇046554	1.9	(1.3-2.6)	1.3	2.6	0.00018
ES〇HMGA1〇ID〇075775	1.4	(1-1.9)	1	1.9	0.048
ES〇RPP14〇ID〇096410	1.4	(1-2.1)	1	2.1	0.047
AP〇KIAA1328〇ID〇045278	0.64	(0.46-0.89)	0.46	0.89	0.0073
AP〇OTUD4〇ID〇070754	1.4	(1-2)	1	2	0.048
AP〇L3HYPDH〇ID〇027739	1.4	(1-1.9)	1	1.9	0.035
AP〇L3HYPDH〇ID〇027738	0.69	(0.5-0.95)	0.5	0.95	0.024
ES〇C8orf59〇ID〇084333	1.5	(1.1-2.1)	1.1	2.1	0.013
AA〇BTBD3〇ID〇058698	0.72	(0.52-0.99)	0.52	0.99	0.045
ES〇LARP4〇ID〇021707	0.71	(0.51-0.99)	0.51	0.99	0.043
ES〇DST〇ID〇076561	0.73	(0.53-1)	0.53	1	0.049
AA〇SULT1A3〇ID〇094137	0.72	(0.52-0.99)	0.52	0.99	0.046
ES〇ARHGAP23〇ID〇040578	1.4	(1-1.9)	1	1.9	0.046
AP〇CD63〇ID〇022241	0.63	(0.46-0.87)	0.46	0.87	0.0046
ES〇SENP5〇ID〇068262	0.65	(0.47-0.89)	0.47	0.89	0.0083
ES〇RPS9〇ID〇051826	1.4	(1-1.9)	1	1.9	0.041
AP〇ELMO1〇ID〇079264	1.4	(1-1.9)	1	1.9	0.048
AD〇EIF3K〇ID〇049685	1.6	(1.1-2.1)	1.1	2.1	0.0066
AA〇SERBP1〇ID〇003355	1.4	(1-1.9)	1	1.9	0.038
AP〇SH3BP2〇ID〇068594	0.7	(0.5-0.96)	0.5	0.96	0.028
AP〇PPM1F〇ID〇061259	0.72	(0.52-0.99)	0.52	0.99	0.045
AP〇PPM1F〇ID〇061260	1.4	(1-1.9)	1	1.9	0.048
ES〇ADRM1〇ID〇060057	1.5	(1.1-2.1)	1.1	2.1	0.025
AD〇RPL8〇ID〇085646	1.5	(1.1-2)	1.1	2	0.022
AD〇RPP25L〇ID〇086179	0.71	(0.51-0.97)	0.51	0.97	0.034
AT〇ZNF396〇ID〇045167	1.4	(1-2)	1	2	0.033
ES〇NKIRAS2〇ID〇040978	0.64	(0.46-0.88)	0.46	0.88	0.0067
AT〇DACT3〇ID〇050577	1.6	(1.1-2.2)	1.1	2.2	0.005
AT〇DACT3〇ID〇050576	0.64	(0.46-0.88)	0.46	0.88	0.0068
ES〇TSC2〇ID〇093836	0.63	(0.44-0.89)	0.44	0.89	0.0091
ES〇LTBP4〇ID〇107680	1.6	(1.1-2.3)	1.1	2.3	0.014
RI〇FAM195B〇ID〇044177	0.67	(0.49-0.93)	0.49	0.93	0.017
RI〇IL32〇ID〇033394	0.67	(0.48-0.93)	0.48	0.93	0.017
AP〇YWHAZ〇ID〇084724	1.4	(1-2)	1	2	0.024
AD〇NDUFS8〇ID〇017279	0.6	(0.43-0.83)	0.43	0.83	0.0018
AT〇TFPI〇ID〇056494	1.4	(1-1.9)	1	1.9	0.041
AT〇TFPI〇ID〇056493	0.68	(0.5-0.94)	0.5	0.94	0.021
AA〇ATAD3A〇ID〇000176	0.68	(0.5-0.94)	0.5	0.94	0.02
ES〇ERGIC1〇ID〇074565	1.4	(1-2)	1	2	0.03
ES〇NDUFB5〇ID〇067705	0.69	(0.5-0.94)	0.5	0.94	0.021
AT〇WLS〇ID〇003361	0.64	(0.46-0.88)	0.46	0.88	0.0061
AT〇PSPC1〇ID〇025404	1.8	(1.3-2.5)	1.3	2.5	0.00035
ES〇HM13〇ID〇058894	1.6	(1.1-2.2)	1.1	2.2	0.0072
AP〇TENC1〇ID〇021923	0.69	(0.5-0.95)	0.5	0.95	0.025
ES〇ABI1〇ID〇011034	1.4	(1-2)	1	2	0.03
ES〇RAB1A〇ID〇053789	0.71	(0.52-0.99)	0.52	0.99	0.04
AT〇C15orf40〇ID〇032246	1.5	(1.1-2)	1.1	2	0.018
ES〇STYXL1〇ID〇080149	1.4	(1-1.9)	1	1.9	0.033
AP〇SCMH1〇ID〇002046	0.66	(0.48-0.92)	0.48	0.92	0.014
AP〇MAFF〇ID〇062216	0.71	(0.52-0.98)	0.52	0.98	0.038
AP〇DUSP6〇ID〇023616	1.4	(1-2)	1	2	0.032
AP〇DUSP6〇ID〇023617	0.72	(0.52-0.99)	0.52	0.99	0.042
ES〇YPEL5〇ID〇053104	0.67	(0.49-0.92)	0.49	0.92	0.014
AP〇RUVBL1〇ID〇066638	0.7	(0.51-0.96)	0.51	0.96	0.029
AP〇RUVBL1〇ID〇066637	1.4	(1-1.9)	1	1.9	0.038
AP〇CAPN2〇ID〇009923	1.6	(1.2-2.2)	1.2	2.2	0.0032
AP〇CAPN2〇ID〇009924	0.62	(0.45-0.86)	0.45	0.86	0.0037
AT〇ZNF765〇ID〇051716	0.64	(0.46-0.88)	0.46	0.88	0.0069
ES〇PXMP2〇ID〇025284	1.4	(1-1.9)	1	1.9	0.036
AT〇SNRPD3〇ID〇061419	1.4	(1-1.9)	1	1.9	0.039
AD〇NDUFB8〇ID〇012835	1.4	(1-1.9)	1	1.9	0.044
AP〇TNRC6B〇ID〇062336	0.7	(0.5-0.97)	0.5	0.97	0.033
AA〇ZNF226〇ID〇050295	0.67	(0.48-0.93)	0.48	0.93	0.017
AT〇PSPC1〇ID〇025402	0.65	(0.47-0.9)	0.47	0.9	0.0084
AP〇CYP2R1〇ID〇014479	0.67	(0.49-0.93)	0.49	0.93	0.018
AP〇SLC39A1〇ID〇007764	1.6	(1.2-2.3)	1.2	2.3	0.0026
AP〇DUOX1〇ID〇030401	1.5	(1-2.1)	1	2.1	0.025
AP〇DUOX1〇ID〇030400	0.68	(0.48-0.95)	0.48	0.95	0.025
AT〇ASXL1〇ID〇058952	1.5	(1.1-2)	1.1	2	0.017
AT〇ASXL1〇ID〇058951	0.68	(0.49-0.94)	0.49	0.94	0.019
RI〇NDUFS7〇ID〇046465	0.69	(0.5-0.95)	0.5	0.95	0.024
AT〇ZNF83〇ID〇051483	1.4	(1-1.9)	1	1.9	0.048
ES〇OCEL1〇ID〇048244	1.9	(1.4-2.7)	1.4	2.7	8.7e-05
ES〇GRB7〇ID〇040698	1.5	(1.1-2)	1.1	2	0.016
AA〇COMT〇ID〇061101	0.71	(0.52-0.98)	0.52	0.98	0.038
AP〇NINJ2〇ID〇019603	0.71	(0.52-0.98)	0.52	0.98	0.039
AT〇WLS〇ID〇003362	1.5	(1.1-2.1)	1.1	2.1	0.0091
AT〇SSH2〇ID〇040062	0.65	(0.47-0.9)	0.47	0.9	0.0096
ES〇RAD52〇ID〇019643	1.4	(1-2)	1	2	0.038
AP〇RALGDS〇ID〇088015	0.66	(0.48-0.91)	0.48	0.91	0.012
AD〇POLD4〇ID〇017172	1.4	(1-1.9)	1	1.9	0.047
ES〇FAM114A1〇ID〇069035	0.63	(0.46-0.87)	0.46	0.87	0.0051
ES〇NDUFB3〇ID〇056781	0.72	(0.52-0.99)	0.52	0.99	0.043
AD〇ARL6IP4〇ID〇025036	1.5	(1.1-2.2)	1.1	2.2	0.018
AT〇EXOC7〇ID〇043562	0.71	(0.52-0.98)	0.52	0.98	0.038
AT〇EXOC7〇ID〇043561	1.5	(1.1-2)	1.1	2	0.022
RI〇EIF6〇ID〇059080	0.72	(0.52-1)	0.52	1	0.047
AP〇LIMS2〇ID〇055226	1.5	(1-2.1)	1	2.1	0.028
AA〇DYNC2LI1〇ID〇053400	0.72	(0.52-0.99)	0.52	0.99	0.042
RI〇SLC39A13〇ID〇015748	0.68	(0.49-0.94)	0.49	0.94	0.021
AD〇ACAA1〇ID〇064017	0.71	(0.51-0.98)	0.51	0.98	0.035
ES〇USO1〇ID〇069551	0.71	(0.52-0.98)	0.52	0.98	0.039
RI〇MFSD10〇ID〇068614	0.71	(0.51-0.97)	0.51	0.97	0.033
AP〇SSFA2〇ID〇056439	1.5	(1.1-2.1)	1.1	2.1	0.015
ES〇MFSD10〇ID〇068616	1.5	(1.1-2.1)	1.1	2.1	0.0098
RI〇CLDN5〇ID〇061070	0.62	(0.43-0.89)	0.43	0.89	0.009
AT〇SPATA33〇ID〇038106	1.4	(1-1.9)	1	1.9	0.037
AT〇SPATA33〇ID〇038107	0.7	(0.51-0.97)	0.51	0.97	0.031
ES〇RFWD2〇ID〇009054	1.4	(1-1.9)	1	1.9	0.033
AT〇BCL2L11〇ID〇054948	1.4	(1-1.9)	1	1.9	0.044
ES〇SEPT6〇ID〇089969	1.4	(1-2)	1	2	0.033
AP〇CCDC64B〇ID〇033362	1.6	(1.1-2.1)	1.1	2.1	0.0072
AP〇SSFA2〇ID〇056438	0.66	(0.48-0.91)	0.48	0.91	0.012
AP〇C19orf24〇ID〇046446	0.66	(0.48-0.92)	0.48	0.92	0.013
AP〇C19orf24〇ID〇046447	1.5	(1.1-2.1)	1.1	2.1	0.0097
AP〇CUL1〇ID〇082148	0.7	(0.51-0.97)	0.51	0.97	0.032
ES〇SCAMP4〇ID〇046562	0.72	(0.53-1)	0.53	1	0.047
AP〇IGJ〇ID〇069442	0.71	(0.5-0.99)	0.5	0.99	0.043
ES〇TMEM256_PLSCR3〇ID〇038937	1.6	(1.1-2.2)	1.1	2.2	0.0056
AT〇NCOR1〇ID〇039416	1.4	(1-2)	1	2	0.027
AT〇NCOR1〇ID〇039418	0.71	(0.51-0.98)	0.51	0.98	0.038
ES〇SEC16A〇ID〇088178	1.6	(1.1-2.2)	1.1	2.2	0.0065
AP〇CYFIP2〇ID〇074325	0.72	(0.52-1)	0.52	1	0.047
RI〇CACTIN〇ID〇046713	1.4	(1-2)	1	2	0.025
AT〇PIGQ〇ID〇032902	1.5	(1.1-2.1)	1.1	2.1	0.011
AT〇PIGQ〇ID〇032901	0.64	(0.47-0.89)	0.47	0.89	0.007
AD〇TNFRSF12A〇ID〇033349	0.7	(0.49-0.99)	0.49	0.99	0.043
AT〇DAZAP2〇ID〇021810	0.69	(0.5-0.95)	0.5	0.95	0.023
AP〇SLC39A1〇ID〇007763	0.6	(0.44-0.84)	0.44	0.84	0.0024
ES〇PCMT1〇ID〇078113	1.5	(1.1-2)	1.1	2	0.017
AP〇MAFF〇ID〇062214	1.5	(1.1-2.1)	1.1	2.1	0.013
ES〇TRAPPC1〇ID〇039077	1.4	(1-1.9)	1	1.9	0.034
AT〇PHACTR1〇ID〇075364	0.71	(0.51-0.98)	0.51	0.98	0.035
ES〇PALM2_AKAP2〇ID〇087174	1.5	(1-2.1)	1	2.1	0.047
AP〇DLG4〇ID〇038845	1.6	(1.1-2.2)	1.1	2.2	0.0083
AP〇DLG4〇ID〇038844	0.65	(0.47-0.9)	0.47	0.9	0.0097
AD〇IL32〇ID〇033436	0.71	(0.51-0.98)	0.51	0.98	0.035
AT〇SPG7〇ID〇038086	1.4	(1-1.9)	1	1.9	0.048
ES〇COX5A〇ID〇031812	0.48	(0.33-0.68)	0.33	0.68	5.5e-05
AP〇PNPLA4〇ID〇088440	0.63	(0.46-0.87)	0.46	0.87	0.0055
AP〇PNPLA4〇ID〇088439	1.6	(1.2-2.2)	1.2	2.2	0.0047
AP〇ZNF276〇ID〇038136	0.62	(0.45-0.86)	0.45	0.86	0.0044
ES〇POMZP3〇ID〇080187	0.64	(0.46-0.88)	0.46	0.88	0.0058
ES〇HNRNPA2B1〇ID〇079037	1.5	(1.1-2)	1.1	2	0.016
AP〇HMCES〇ID〇066713	0.71	(0.51-0.97)	0.51	0.97	0.034
AP〇HMCES〇ID〇066714	1.4	(1-1.9)	1	1.9	0.037
ES〇RAB25〇ID〇008171	1.4	(1-1.9)	1	1.9	0.043
AP〇TBC1D14〇ID〇068727	1.6	(1.2-2.2)	1.2	2.2	0.0034
AA〇NR4A2〇ID〇055620	0.69	(0.5-0.96)	0.5	0.96	0.028
ES〇ANXA8L2〇ID〇011457	1.4	(1-2)	1	2	0.034
ES〇SGMS1〇ID〇011575	0.68	(0.49-0.95)	0.49	0.95	0.023
AD〇TMEM161B〇ID〇072733	0.65	(0.47-0.9)	0.47	0.9	0.0094
AA〇BTN2A2〇ID〇075643	0.69	(0.5-0.96)	0.5	0.96	0.028
ES〇UBE2D4〇ID〇079372	0.7	(0.51-0.97)	0.51	0.97	0.031
ES〇ZNF720〇ID〇036289	0.71	(0.52-0.98)	0.52	0.98	0.038
AP〇AKR1C3〇ID〇010653	1.4	(1-2)	1	2	0.027
AP〇AKR1C3〇ID〇010654	0.7	(0.5-0.96)	0.5	0.96	0.027
ES〇ABI1〇ID〇011050	1.6	(1.1-2.2)	1.1	2.2	0.0049
AA〇SCRN2〇ID〇042121	0.72	(0.52-1)	0.52	1	0.047
ES〇PSMB3〇ID〇040592	1.4	(1-1.9)	1	1.9	0.04
AT〇TP53I11〇ID〇015484	1.4	(1-2)	1	2	0.029
AT〇ABCA6〇ID〇043162	0.69	(0.5-0.96)	0.5	0.96	0.029
AT〇ABCA6〇ID〇043161	1.4	(1-2)	1	2	0.029
ES〇WDR74〇ID〇016457	1.6	(1.1-2.2)	1.1	2.2	0.0056
ES〇NPIPA8〇ID〇266561	0.61	(0.44-0.85)	0.44	0.85	0.0036
AT〇KIF9〇ID〇064495	0.63	(0.46-0.88)	0.46	0.88	0.006
AT〇KIF9〇ID〇064493	1.5	(1.1-2.1)	1.1	2.1	0.0086
AP〇OSBPL1A〇ID〇044877	1.7	(1.2-2.3)	1.2	2.3	0.0019
AP〇OSBPL1A〇ID〇044876	0.59	(0.42-0.81)	0.42	0.81	0.0011
ES〇DECR1〇ID〇084407	0.69	(0.48-0.98)	0.48	0.98	0.039
ES〇GBP6〇ID〇003718	1.4	(1-2)	1	2	0.032
AT〇ACYP2〇ID〇053566	1.5	(1.1-2)	1.1	2	0.019
ES〇KIF9〇ID〇064503	0.61	(0.44-0.84)	0.44	0.84	0.0028
AP〇CHMP2A〇ID〇052482	0.68	(0.5-0.94)	0.5	0.94	0.02
ES〇GIPC1〇ID〇047979	1.5	(1.1-2)	1.1	2	0.022
AP〇SLC20A2〇ID〇083729	1.5	(1.1-2)	1.1	2	0.02
ES〇C3orf33〇ID〇067352	0.62	(0.43-0.91)	0.43	0.91	0.014
ES〇TPX2〇ID〇058903	1.4	(1-1.9)	1	1.9	0.037
AP〇MGAT1〇ID〇075020	0.66	(0.48-0.92)	0.48	0.92	0.013
AP〇TRIM7〇ID〇075045	1.6	(1.2-2.3)	1.2	2.3	0.0053
AP〇SOGA2〇ID〇044571	1.5	(1.1-2.1)	1.1	2.1	0.017
RI〇TCF3〇ID〇046537	0.71	(0.52-0.97)	0.52	0.97	0.034
AP〇EGFL7〇ID〇088187	1.4	(1-1.9)	1	1.9	0.042
ES〇GPR89A〇ID〇007317	1.5	(1.1-2)	1.1	2	0.023
RI〇NUDT8〇ID〇017259	0.69	(0.5-0.95)	0.5	0.95	0.025
ES〇GGA3〇ID〇043400	1.6	(1.1-2.2)	1.1	2.2	0.0058
ES〇FAXC〇ID〇099934	0.68	(0.48-0.96)	0.48	0.96	0.03
RI〇ATXN2L〇ID〇035834	1.6	(1.2-2.2)	1.2	2.2	0.003
AP〇RAMP1〇ID〇058148	0.71	(0.51-0.99)	0.51	0.99	0.044
AP〇CABIN1〇ID〇061387	1.5	(1.1-2.1)	1.1	2.1	0.0078
AT〇WDR93〇ID〇032442	1.5	(1.1-2)	1.1	2	0.024
AT〇WDR93〇ID〇032441	0.67	(0.48-0.93)	0.48	0.93	0.017
ES〇FAM195B〇ID〇044175	1.4	(1-1.9)	1	1.9	0.047
AD〇LGALS3BP〇ID〇043966	0.7	(0.51-0.97)	0.51	0.97	0.033
AP〇FAM134C〇ID〇041082	0.61	(0.44-0.84)	0.44	0.84	0.0027
AP〇FAM134C〇ID〇041083	1.7	(1.2-2.3)	1.2	2.3	0.0015
AP〇FAM65A〇ID〇037083	0.67	(0.48-0.93)	0.48	0.93	0.018
AP〇FAM65A〇ID〇037081	1.5	(1.1-2.1)	1.1	2.1	0.018
AP〇FOXJ3〇ID〇002064	1.6	(1.2-2.3)	1.2	2.3	0.0033
AP〇PLEC〇ID〇085511	0.7	(0.5-0.96)	0.5	0.96	0.029
AP〇ARHGEF7〇ID〇026278	1.4	(1-2)	1	2	0.035
AT〇CHD6〇ID〇059422	0.65	(0.47-0.89)	0.47	0.89	0.0083
AT〇CHD6〇ID〇059424	1.6	(1.2-2.2)	1.2	2.2	0.0035
ES〇ADK〇ID〇012259	0.68	(0.5-0.94)	0.5	0.94	0.019
ES〇CPSF7〇ID〇016215	1.4	(1-2)	1	2	0.032
AP〇OARD1〇ID〇076082	0.71	(0.51-0.97)	0.51	0.97	0.033
ES〇RPS6KA1〇ID〇001292	1.5	(1.1-2.1)	1.1	2.1	0.014
AT〇CREBRF〇ID〇074575	1.7	(1.2-2.3)	1.2	2.3	0.0018
AT〇CREBRF〇ID〇074576	0.59	(0.43-0.82)	0.43	0.82	0.0018
AA〇FAM86B1〇ID〇082715	0.68	(0.49-0.94)	0.49	0.94	0.021
AP〇SLC1A5〇ID〇050595	0.7	(0.51-0.97)	0.51	0.97	0.031
ES〇CAMLG〇ID〇099505	0.62	(0.44-0.87)	0.44	0.87	0.0066
AD〇KCTD18〇ID〇056745	1.4	(1-2)	1	2	0.026
AP〇NEDD4L〇ID〇045649	1.5	(1.1-2)	1.1	2	0.017
AA〇MED11〇ID〇038579	0.72	(0.52-0.99)	0.52	0.99	0.044
AP〇RAMP1〇ID〇058149	1.5	(1.1-2.1)	1.1	2.1	0.016
AP〇MAP3K7CL〇ID〇060308	1.5	(1.1-2.1)	1.1	2.1	0.014
ES〇UBE2F〇ID〇058182	0.68	(0.48-0.97)	0.48	0.97	0.032
ES〇RAP1B〇ID〇022941	0.67	(0.48-0.92)	0.48	0.92	0.014
AA〇MRPL42〇ID〇023704	1.4	(1-1.9)	1	1.9	0.038
AA〇TNK2〇ID〇068210	0.71	(0.52-0.99)	0.52	0.99	0.043
ES〇TBRG1〇ID〇019228	0.7	(0.51-0.96)	0.51	0.96	0.028
RI〇CHTF8〇ID〇037262	1.5	(1.1-2.1)	1.1	2.1	0.0093
ES〇FLAD1〇ID〇007868	0.65	(0.48-0.9)	0.48	0.9	0.0097
RI〇SS18L1〇ID〇060047	1.4	(1-1.9)	1	1.9	0.04
AD〇CTBS〇ID〇003608	0.66	(0.48-0.91)	0.48	0.91	0.012
ES〇GLG1〇ID〇234290	0.68	(0.48-0.96)	0.48	0.96	0.029
ES〇PROM2〇ID〇054498	1.4	(1-2)	1	2	0.035
AP〇OARD1〇ID〇076080	1.5	(1.1-2)	1.1	2	0.021
AA〇C1RL〇ID〇020074	0.62	(0.45-0.86)	0.45	0.86	0.0041
AA〇PROM2〇ID〇054496	0.7	(0.51-0.97)	0.51	0.97	0.033
AD〇IRF9〇ID〇026878	0.6	(0.43-0.83)	0.43	0.83	0.0019
AT〇C7orf10〇ID〇079305	1.5	(1.1-2)	1.1	2	0.02
AT〇C7orf10〇ID〇079306	0.69	(0.5-0.95)	0.5	0.95	0.022
ES〇AIG1〇ID〇077976	0.7	(0.51-0.97)	0.51	0.97	0.032
ES〇USP7〇ID〇033965	0.64	(0.46-0.89)	0.46	0.89	0.007
AT〇FMO5〇ID〇007369	1.5	(1.1-2)	1.1	2	0.02
RI〇FBXL8〇ID〇036937	0.72	(0.52-0.99)	0.52	0.99	0.046
ES〇C17orf49〇ID〇038825	1.4	(1-1.9)	1	1.9	0.043
ES〇GATAD2A〇ID〇048634	0.69	(0.5-0.96)	0.5	0.96	0.026
ES〇HSD17B4〇ID〇073082	0.63	(0.46-0.88)	0.46	0.88	0.0065
AD〇TFRC〇ID〇068220	1.4	(1-2)	1	2	0.033
AP〇VDAC2〇ID〇012271	1.4	(1-1.9)	1	1.9	0.033
AP〇VDAC2〇ID〇012272	0.7	(0.51-0.96)	0.51	0.96	0.027
AP〇HDHD3〇ID〇087276	0.72	(0.52-0.99)	0.52	0.99	0.046
ES〇PTPN6〇ID〇020036	0.71	(0.51-0.97)	0.51	0.97	0.033
ES〇SUMF2〇ID〇079803	0.7	(0.51-0.97)	0.51	0.97	0.03
ES〇TECR〇ID〇564146	0.71	(0.52-0.99)	0.52	0.99	0.042
AP〇MOCS2〇ID〇071995	0.55	(0.4-0.76)	0.4	0.76	0.00033
AP〇MOCS2〇ID〇071996	1.8	(1.3-2.6)	1.3	2.6	0.00026
ES〇SERPINA1〇ID〇029136	1.6	(1.1-2.2)	1.1	2.2	0.0065
AT〇FILIP1L〇ID〇065811	0.72	(0.52-1)	0.52	1	0.047
AT〇GFM1〇ID〇067446	1.4	(1-2)	1	2	0.035
AP〇ALDOA〇ID〇036035	1.4	(1-1.9)	1	1.9	0.036
AP〇FDFT1〇ID〇082638	0.64	(0.47-0.89)	0.47	0.89	0.0075
ES〇LYRM5〇ID〇020816	0.63	(0.45-0.9)	0.45	0.9	0.012
ES〇NIF3L1〇ID〇056772	0.68	(0.49-0.94)	0.49	0.94	0.019
AD〇CNKSR1〇ID〇001240	0.64	(0.46-0.89)	0.46	0.89	0.0074
ES〇LRRC28〇ID〇032636	0.64	(0.47-0.88)	0.47	0.88	0.0064
AP〇NEK6〇ID〇087528	0.69	(0.5-0.96)	0.5	0.96	0.026
AD〇CTSA〇ID〇059645	1.4	(1-1.9)	1	1.9	0.039
AT〇RNF175〇ID〇070879	1.4	(1-1.9)	1	1.9	0.041
AP〇SGK1〇ID〇077771	0.7	(0.51-0.97)	0.51	0.97	0.03
AP〇KIAA1328〇ID〇045279	1.7	(1.3-2.4)	1.3	2.4	0.00087
ES〇C19orf82〇ID〇047381	0.68	(0.48-0.95)	0.48	0.95	0.023
RI〇LRTOMT〇ID〇017536	0.63	(0.45-0.88)	0.45	0.88	0.006
ES〇PICALM〇ID〇018175	0.66	(0.48-0.92)	0.48	0.92	0.013
AP〇SLC4A2〇ID〇082326	1.5	(1.1-2)	1.1	2	0.023
AP〇SEC14L1〇ID〇043701	1.5	(1.1-2.1)	1.1	2.1	0.013
AT〇SLC30A5〇ID〇072302	0.71	(0.52-0.98)	0.52	0.98	0.039
RI〇TMEM205〇ID〇047666	0.7	(0.5-0.96)	0.5	0.96	0.028
AT〇CKLF_CMTM1〇ID〇036737	1.6	(1.1-2.2)	1.1	2.2	0.0069
ES〇FLOT2〇ID〇040016	0.67	(0.48-0.92)	0.48	0.92	0.014
AA〇TMEM91〇ID〇050059	1.4	(1-2)	1	2	0.036
AD〇OSGEP〇ID〇026442	0.65	(0.47-0.9)	0.47	0.9	0.0095
ES〇SLC25A26〇ID〇065549	0.71	(0.51-0.98)	0.51	0.98	0.037
ES〇ARNTL〇ID〇014444	1.5	(1-2)	1	2	0.025
AD〇PIGV〇ID〇001303	1.6	(1.1-2.2)	1.1	2.2	0.0087
ES〇CARD16〇ID〇018545	1.5	(1.1-2)	1.1	2	0.016
ES〇HOOK2〇ID〇047866	1.5	(1.1-2)	1.1	2	0.018
AT〇IQCK〇ID〇034333	0.67	(0.48-0.92)	0.48	0.92	0.015
AT〇IQCK〇ID〇034334	1.5	(1.1-2)	1.1	2	0.023
ES〇TMEM256_PLSCR3〇ID〇038938	1.6	(1.2-2.3)	1.2	2.3	0.0033
ES〇ING4〇ID〇019915	1.4	(1.1-2)	1.1	2	0.023
ES〇TMEM43〇ID〇063521	0.7	(0.5-0.96)	0.5	0.96	0.027
AD〇C18orf32〇ID〇045475	1.4	(1-1.9)	1	1.9	0.044
AT〇CLIP1〇ID〇024948	0.69	(0.5-0.95)	0.5	0.95	0.023
ES〇AXIN1〇ID〇032866	1.4	(1-2)	1	2	0.026
AD〇IL32〇ID〇033423	0.7	(0.51-0.96)	0.51	0.96	0.029
AP〇CAPRIN1〇ID〇014941	1.7	(1.2-2.3)	1.2	2.3	0.002
AP〇SERF1A〇ID〇072414	1.5	(1.1-2)	1.1	2	0.02
AP〇SERF1A〇ID〇072413	0.68	(0.49-0.94)	0.49	0.94	0.02
AP〇CAPRIN1〇ID〇014940	0.63	(0.46-0.88)	0.46	0.88	0.0057
ES〇SH3YL1〇ID〇052500	1.5	(1-2.1)	1	2.1	0.042
AT〇PTPLAD2〇ID〇085991	0.71	(0.52-0.98)	0.52	0.98	0.037
AP〇BCAR1〇ID〇037595	1.7	(1.3-2.4)	1.3	2.4	0.00084
AT〇CYHR1〇ID〇085616	0.6	(0.43-0.83)	0.43	0.83	0.0023
AT〇CYHR1〇ID〇085617	1.6	(1.2-2.2)	1.2	2.2	0.0039
AP〇SERF1B〇ID〇072402	1.4	(1-1.9)	1	1.9	0.049
ES〇RASEF〇ID〇266563	1.5	(1.1-2.1)	1.1	2.1	0.02
AD〇CPNE1〇ID〇059183	0.67	(0.49-0.93)	0.49	0.93	0.016
ES〇ERBB2IP〇ID〇072263	0.71	(0.51-0.99)	0.51	0.99	0.043
RI〇ZNF226〇ID〇050292	0.69	(0.5-0.95)	0.5	0.95	0.024
AP〇NNMT〇ID〇018817	2.4	(1.2-4.8)	1.2	4.8	0.011
AT〇NEK11〇ID〇066783	1.5	(1.1-2)	1.1	2	0.02
AP〇KLHL13〇ID〇089929	1.4	(1-2)	1	2	0.039
AA〇LGALS3BP〇ID〇043934	0.71	(0.51-0.97)	0.51	0.97	0.034
AT〇WWOX〇ID〇037672	1.5	(1.1-2.1)	1.1	2.1	0.015
ES〇NCAPG2〇ID〇082527	1.5	(1.1-2)	1.1	2	0.018
ES〇MAPKAP1〇ID〇087586	0.7	(0.5-0.97)	0.5	0.97	0.035
AT〇FAM135A〇ID〇076634	0.7	(0.51-0.97)	0.51	0.97	0.032
AT〇FAM135A〇ID〇076635	1.5	(1.1-2)	1.1	2	0.018
AP〇RFFL〇ID〇040228	0.69	(0.5-0.96)	0.5	0.96	0.025
AT〇C22orf39〇ID〇061054	1.5	(1.1-2.1)	1.1	2.1	0.013
AT〇SPAG16〇ID〇057329	0.67	(0.49-0.93)	0.49	0.93	0.016
AD〇AGR2〇ID〇078873	0.7	(0.51-0.97)	0.51	0.97	0.033
ES〇KLHL5〇ID〇069044	0.67	(0.48-0.92)	0.48	0.92	0.015
AP〇SLC35A5〇ID〇066110	0.71	(0.51-0.98)	0.51	0.98	0.038
RI〇SULT1A3〇ID〇094138	0.68	(0.49-0.94)	0.49	0.94	0.019
ES〇PTMS〇ID〇293234	0.66	(0.48-0.92)	0.48	0.92	0.014
AT〇SLC6A2〇ID〇036444	1.6	(1.1-2.3)	1.1	2.3	0.013
AT〇SLC6A2〇ID〇036445	0.63	(0.44-0.91)	0.44	0.91	0.013
ES〇ECHDC2〇ID〇003035	0.7	(0.49-0.98)	0.49	0.98	0.039
ES〇TPD52L2〇ID〇060172	1.5	(1.1-2)	1.1	2	0.016
ES〇ZNF263〇ID〇033512	0.62	(0.43-0.9)	0.43	0.9	0.011
ES〇MARK2〇ID〇016544	1.5	(1.1-2)	1.1	2	0.019
AP〇SORL1〇ID〇019182	1.4	(1-2)	1	2	0.049
AA〇SRRT〇ID〇081018	1.4	(1-1.9)	1	1.9	0.037
AP〇INPPL1〇ID〇017589	1.4	(1-1.9)	1	1.9	0.041
AP〇INPPL1〇ID〇017588	0.7	(0.51-0.97)	0.51	0.97	0.034
AP〇TTYH3〇ID〇078630	0.71	(0.52-0.98)	0.52	0.98	0.038
AP〇TTYH3〇ID〇078631	1.4	(1-1.9)	1	1.9	0.038
AA〇IFNAR2〇ID〇060390	0.61	(0.44-0.84)	0.44	0.84	0.0028
AT〇PTCHD4〇ID〇076445	1.6	(1.2-2.3)	1.2	2.3	0.0028
AT〇PTCHD4〇ID〇076446	0.59	(0.43-0.83)	0.43	0.83	0.0019
AD〇INTS10〇ID〇082887	0.71	(0.52-0.98)	0.52	0.98	0.037
AP〇SOCS6〇ID〇045786	1.4	(1-2.1)	1	2.1	0.047
AP〇SOCS6〇ID〇045787	0.68	(0.48-0.98)	0.48	0.98	0.039
AD〇CSPP1〇ID〇084079	0.68	(0.47-0.98)	0.47	0.98	0.04
AD〇PREPL〇ID〇053450	1.6	(1.1-2.2)	1.1	2.2	0.0088
AP〇GPC4〇ID〇090142	1.6	(1-2.4)	1	2.4	0.037
ES〇PRKAG2〇ID〇082392	1.4	(1-2)	1	2	0.034
AP〇CAB39〇ID〇057908	1.5	(1.1-2.1)	1.1	2.1	0.015
AP〇CAB39〇ID〇057909	0.67	(0.48-0.92)	0.48	0.92	0.014
AT〇SLC4A8〇ID〇021857	0.58	(0.42-0.81)	0.42	0.81	0.0012
ES〇ERBB2〇ID〇040682	0.64	(0.47-0.89)	0.47	0.89	0.0069
AP〇AGAP3〇ID〇082350	1.4	(1-1.9)	1	1.9	0.045
AT〇WBSCR22〇ID〇079996	1.6	(1.1-2.2)	1.1	2.2	0.0063
AT〇TROVE2〇ID〇009253	1.6	(1.2-2.3)	1.2	2.3	0.0025
AT〇TROVE2〇ID〇009255	0.61	(0.44-0.85)	0.44	0.85	0.0029
AP〇SEMA3C〇ID〇080236	1.6	(1.1-2.2)	1.1	2.2	0.008
AA〇PSPH〇ID〇079781	0.72	(0.52-0.99)	0.52	0.99	0.045
AT〇MAP4〇ID〇064550	1.5	(1.1-2)	1.1	2	0.02
AD〇TDP1〇ID〇028812	0.62	(0.44-0.86)	0.44	0.86	0.0038
AA〇NDUFS7〇ID〇046467	1.5	(1.1-2.1)	1.1	2.1	0.016
ES〇DEPDC1B〇ID〇072155	1.6	(1.2-2.2)	1.2	2.2	0.0038
AT〇MAP4〇ID〇064549	0.72	(0.52-0.99)	0.52	0.99	0.043
ES〇SSFA2〇ID〇056442	1.4	(1-1.9)	1	1.9	0.046
ES〇UBE2W〇ID〇084194	0.71	(0.51-0.98)	0.51	0.98	0.035
RI〇PIGQ〇ID〇032906	0.7	(0.5-0.97)	0.5	0.97	0.03
ES〇CUL2〇ID〇011224	0.71	(0.52-0.99)	0.52	0.99	0.041
ES〇APP〇ID〇060288	0.72	(0.52-0.99)	0.52	0.99	0.045
RI〇TRIM5〇ID〇014072	0.67	(0.49-0.93)	0.49	0.93	0.016
ES〇RHNO1〇ID〇019726	1.5	(1-2.1)	1	2.1	0.027
AP〇TMEM63A〇ID〇009999	1.4	(1-2)	1	2	0.036
AP〇TMEM63A〇ID〇010000	0.69	(0.5-0.96)	0.5	0.96	0.028
AP〇DLG1〇ID〇068279	1.5	(1.1-2)	1.1	2	0.019
AP〇SEPP1〇ID〇071901	0.69	(0.5-0.95)	0.5	0.95	0.022
AP〇MAFG〇ID〇044239	0.7	(0.5-0.98)	0.5	0.98	0.04
RI〇OGG1〇ID〇063164	0.71	(0.52-0.98)	0.52	0.98	0.036
AT〇CSMD2〇ID〇001690	1.4	(1-1.9)	1	1.9	0.042
ES〇EI24〇ID〇019302	1.5	(1.1-2)	1.1	2	0.017
ES〇KLHL24〇ID〇067806	0.64	(0.46-0.88)	0.46	0.88	0.0072
AP〇SGK1〇ID〇077773	1.4	(1-1.9)	1	1.9	0.034
AP〇CTDNEP1〇ID〇038878	1.6	(1.1-2.1)	1.1	2.1	0.0073
AP〇PRKCH〇ID〇027798	0.72	(0.52-0.99)	0.52	0.99	0.043
ES〇ANK2〇ID〇070397	0.68	(0.47-0.99)	0.47	0.99	0.042
ES〇COL1A1〇ID〇444850	0.66	(0.47-0.92)	0.47	0.92	0.015
AP〇C17orf62〇ID〇044335	1.4	(1-1.9)	1	1.9	0.048
ES〇NCOA2〇ID〇084118	0.68	(0.49-0.94)	0.49	0.94	0.02
ES〇EIF2A〇ID〇067283	0.72	(0.52-0.99)	0.52	0.99	0.044
ES〇NFIB〇ID〇085884	0.57	(0.41-0.81)	0.41	0.81	0.0017
AT〇TSC1〇ID〇087998	1.4	(1-1.9)	1	1.9	0.043
AT〇TSC1〇ID〇087997	0.72	(0.53-1)	0.53	1	0.048
AP〇FGD3〇ID〇086889	0.71	(0.51-0.99)	0.51	0.99	0.044
AP〇UBTF〇ID〇041830	0.7	(0.51-0.97)	0.51	0.97	0.03
ES〇RAB3IP〇ID〇023348	0.67	(0.48-0.92)	0.48	0.92	0.014
AA〇COX4I1〇ID〇037904	0.67	(0.47-0.95)	0.47	0.95	0.025
AA〇ACHE〇ID〇081027	0.72	(0.52-1)	0.52	1	0.047
ES〇CHID1〇ID〇013814	0.7	(0.51-0.97)	0.51	0.97	0.033
AD〇HNRNPH3〇ID〇011928	1.4	(1-1.9)	1	1.9	0.047
AP〇SH3BGR〇ID〇060639	1.5	(1-2.1)	1	2.1	0.028
AP〇SH3BGR〇ID〇060637	0.67	(0.47-0.96)	0.47	0.96	0.028
AT〇TTC14〇ID〇067724	1.5	(1.1-2)	1.1	2	0.02
AT〇TTC14〇ID〇067725	0.67	(0.48-0.92)	0.48	0.92	0.013
AD〇COX14〇ID〇021652	1.5	(1.1-2)	1.1	2	0.02
ES〇U2AF1L4〇ID〇049268	0.7	(0.51-0.96)	0.51	0.96	0.029
AA〇TYMP〇ID〇062853	0.69	(0.5-0.95)	0.5	0.95	0.023
AP〇RFFL〇ID〇040230	1.4	(1-2)	1	2	0.027
ES〇MLST8〇ID〇033220	1.5	(1.1-2.1)	1.1	2.1	0.011
ES〇SMARCD1〇ID〇021643	1.5	(1.1-2)	1.1	2	0.018
RI〇TMEM161B〇ID〇072738	0.68	(0.49-0.95)	0.49	0.95	0.022
ES〇DMKN〇ID〇049143	1.4	(1-2)	1	2	0.03
ES〇NPIPA8〇ID〇100474	0.66	(0.46-0.93)	0.46	0.93	0.016
ES〇SMAD2〇ID〇045451	1.5	(1.1-2)	1.1	2	0.024
AP〇YY1AP1〇ID〇008097	1.4	(1-1.9)	1	1.9	0.036
RI〇CCDC74A〇ID〇055387	0.71	(0.51-0.98)	0.51	0.98	0.039
AT〇ITGB3〇ID〇042067	1.4	(1-2)	1	2	0.032
ES〇ZBTB7B〇ID〇007879	1.5	(1.1-2)	1.1	2	0.018
ES〇GPS1〇ID〇044284	0.66	(0.48-0.91)	0.48	0.91	0.012
ES〇USP42〇ID〇078717	0.71	(0.5-0.99)	0.5	0.99	0.043
AP〇FADS2〇ID〇016292	0.6	(0.44-0.83)	0.44	0.83	0.0021
RI〇SIDT2〇ID〇018886	0.72	(0.52-0.99)	0.52	0.99	0.043
AT〇SPAG16〇ID〇057334	1.5	(1.1-2.1)	1.1	2.1	0.01
AP〇ACPL2〇ID〇067058	1.7	(1.2-2.3)	1.2	2.3	0.0024
ES〇NDUFS4〇ID〇072010	0.72	(0.52-0.99)	0.52	0.99	0.046
AT〇PSPC1〇ID〇025403	1.8	(1.3-2.4)	1.3	2.4	0.00065
AT〇GK5〇ID〇067105	1.4	(1-1.9)	1	1.9	0.048
ES〇TXNDC15〇ID〇073436	0.72	(0.52-0.99)	0.52	0.99	0.044
AP〇FKBP9〇ID〇079200	1.4	(1-2)	1	2	0.032
AP〇FKBP9〇ID〇079199	0.69	(0.5-0.95)	0.5	0.95	0.021
ES〇PYGL〇ID〇027498	0.69	(0.5-0.95)	0.5	0.95	0.023
AD〇NETO2〇ID〇036320	1.5	(1.1-2.1)	1.1	2.1	0.0093
ES〇COX5A〇ID〇031811	0.69	(0.5-0.95)	0.5	0.95	0.022
RI〇CCDC88A〇ID〇053613	1.7	(1.2-2.4)	1.2	2.4	0.001
AT〇FIP1L1〇ID〇069311	1.5	(1.1-2.1)	1.1	2.1	0.01
ES〇ZKSCAN1〇ID〇080872	0.69	(0.5-0.96)	0.5	0.96	0.027
AP〇MTUS1〇ID〇082817	0.68	(0.49-0.95)	0.49	0.95	0.025
RI〇SUPT7L〇ID〇053040	0.71	(0.52-0.98)	0.52	0.98	0.036
ES〇DHRS4L2〇ID〇026806	1.4	(1-1.9)	1	1.9	0.037
AT〇HEXA〇ID〇031540	1.4	(1-1.9)	1	1.9	0.044
ES〇SFI1〇ID〇061873	1.4	(1-2)	1	2	0.028
ES〇MUC1〇ID〇007960	1.6	(1.1-2.2)	1.1	2.2	0.005
ES〇CSTF2〇ID〇089612	0.72	(0.52-0.99)	0.52	0.99	0.046
ES〇COL1A2〇ID〇306247	0.6	(0.42-0.86)	0.42	0.86	0.0056
ES〇UBE2J2〇ID〇000047	0.72	(0.52-1)	0.52	1	0.047
AD〇FXYD5〇ID〇049080	0.68	(0.49-0.94)	0.49	0.94	0.018
ES〇EPS8L2〇ID〇013732	1.4	(1-2)	1	2	0.042
AT〇FIP1L1〇ID〇069310	0.67	(0.49-0.92)	0.49	0.92	0.014
ES〇CD44〇ID〇015267	1.4	(1-2)	1	2	0.029
AT〇SETMAR〇ID〇062991	0.68	(0.5-0.94)	0.5	0.94	0.02
AT〇SETMAR〇ID〇062992	1.4	(1-1.9)	1	1.9	0.035
AP〇IL11RA〇ID〇086208	1.4	(1-1.9)	1	1.9	0.04
ES〇MFSD10〇ID〇100323	1.4	(1-2)	1	2	0.045
ES〇NAE1〇ID〇036877	1.4	(1-1.9)	1	1.9	0.045
ES〇PQBP1〇ID〇089026	1.4	(1-2)	1	2	0.03
AP〇MFSD10〇ID〇068613	0.55	(0.39-0.76)	0.39	0.76	0.0003
AP〇MFSD10〇ID〇068612	1.8	(1.3-2.5)	1.3	2.5	0.0003
ES〇TPRA1〇ID〇066610	1.4	(1-2)	1	2	0.028
AT〇HGF〇ID〇080249	1.5	(1.1-2)	1.1	2	0.021
AT〇ZNF599〇ID〇049002	1.6	(1.2-2.2)	1.2	2.2	0.004
AD〇CFL2〇ID〇027171	1.6	(1.2-2.3)	1.2	2.3	0.0031
ES〇PDXK〇ID〇192507	0.57	(0.4-0.82)	0.4	0.82	0.0026
AD〇MIB2〇ID〇000198	1.4	(1-1.9)	1	1.9	0.047
AT〇ADAM19〇ID〇074386	1.4	(1-2)	1	2	0.034
ES〇BECN1〇ID〇041140	1.5	(1.1-2.1)	1.1	2.1	0.01
AP〇FDFT1〇ID〇082641	1.4	(1-1.9)	1	1.9	0.037
AT〇LHPP〇ID〇013401	0.66	(0.48-0.91)	0.48	0.91	0.012
AT〇LHPP〇ID〇013400	1.5	(1.1-2.1)	1.1	2.1	0.0086
AT〇PPM1K〇ID〇069885	0.71	(0.51-0.97)	0.51	0.97	0.032
AD〇ELN〇ID〇080041	0.69	(0.48-0.99)	0.48	0.99	0.042
ES〇RNF185〇ID〇061829	1.5	(1.1-2)	1.1	2	0.017
AP〇ANKRD13D〇ID〇017156	0.69	(0.5-0.95)	0.5	0.95	0.023
AP〇ANKRD13D〇ID〇017155	1.5	(1.1-2)	1.1	2	0.023
ES〇GLG1〇ID〇037566	0.72	(0.52-0.99)	0.52	0.99	0.045
AP〇LRFN4〇ID〇017140	0.65	(0.47-0.9)	0.47	0.9	0.009
AP〇LRFN4〇ID〇017141	1.5	(1.1-2.1)	1.1	2.1	0.01
ES〇UIMC1〇ID〇074692	0.54	(0.37-0.78)	0.37	0.78	0.001
ES〇EPSTI1〇ID〇025762	1.4	(1.1-2)	1.1	2	0.023
ES〇LGALS3BP〇ID〇043933	1.4	(1-2)	1	2	0.03
ES〇DNAJC1〇ID〇010978	0.69	(0.5-0.95)	0.5	0.95	0.022
AT〇NOVA1〇ID〇027045	1.4	(1-2)	1	2	0.04
RI〇MRPL4〇ID〇047487	0.7	(0.51-0.96)	0.51	0.96	0.028
AT〇NREP〇ID〇072976	1.5	(1.1-2)	1.1	2	0.021
RI〇AMZ2〇ID〇043133	1.5	(1.1-2)	1.1	2	0.016
AP〇HVCN1〇ID〇024488	1.7	(1.2-2.5)	1.2	2.5	0.0064
AP〇SLC16A5〇ID〇043348	1.4	(1-2)	1	2	0.027
AA〇BTN2A1〇ID〇075670	0.62	(0.45-0.85)	0.45	0.85	0.0032
AP〇SPRY1〇ID〇070528	0.69	(0.5-0.96)	0.5	0.96	0.026
AP〇SPRY1〇ID〇070529	1.5	(1.1-2)	1.1	2	0.023
AD〇IP6K2〇ID〇064759	1.5	(1.1-2)	1.1	2	0.023
AD〇RAC2〇ID〇062104	0.59	(0.43-0.81)	0.43	0.81	0.0013
AP〇SLC48A1〇ID〇021358	0.68	(0.49-0.94)	0.49	0.94	0.02
AP〇SLC48A1〇ID〇021359	1.5	(1.1-2)	1.1	2	0.02
RI〇SLC35C1〇ID〇015509	0.66	(0.48-0.92)	0.48	0.92	0.013
AP〇AKAP1〇ID〇042605	1.6	(1.1-2.2)	1.1	2.2	0.0088
ES〇AFMID〇ID〇043798	1.4	(1-1.9)	1	1.9	0.039
ES〇SMG7〇ID〇009184	0.67	(0.49-0.93)	0.49	0.93	0.015
AT〇ACYP2〇ID〇053568	0.71	(0.51-0.98)	0.51	0.98	0.036
AP〇RANGAP1〇ID〇062416	0.72	(0.52-0.99)	0.52	0.99	0.046
AP〇CCDC82〇ID〇018408	1.4	(1-2)	1	2	0.026
AT〇NEU3〇ID〇017812	0.66	(0.48-0.91)	0.48	0.91	0.011
ES〇CD74〇ID〇074077	1.4	(1-1.9)	1	1.9	0.034
AP〇FLT3LG〇ID〇050941	1.4	(1-2)	1	2	0.035
AP〇FLT3LG〇ID〇050942	0.7	(0.5-0.97)	0.5	0.97	0.035
ES〇UCHL5〇ID〇009245	0.72	(0.52-0.99)	0.52	0.99	0.043
AP〇FEZ2〇ID〇053193	1.6	(1.1-2.2)	1.1	2.2	0.0055
AP〇FEZ2〇ID〇053195	0.61	(0.44-0.85)	0.44	0.85	0.0036
AD〇HBP1〇ID〇081336	1.5	(1.1-2)	1.1	2	0.019
AP〇PDE4D〇ID〇072142	0.66	(0.48-0.91)	0.48	0.91	0.012
ES〇VPS29〇ID〇024444	0.7	(0.51-0.96)	0.51	0.96	0.028
AA〇PDLIM7〇ID〇074781	0.65	(0.47-0.9)	0.47	0.9	0.0087
AP〇ERBB3〇ID〇022351	1.7	(1.2-2.3)	1.2	2.3	0.0018
AP〇UBTF〇ID〇041828	1.6	(1.1-2.1)	1.1	2.1	0.0074
AP〇SLC2A11〇ID〇061339	1.4	(1-1.9)	1	1.9	0.045
AP〇COX7A1〇ID〇049369	0.71	(0.51-0.98)	0.51	0.98	0.035
AP〇COX7A1〇ID〇049370	1.4	(1-2)	1	2	0.027
ES〇ARHGEF1〇ID〇050102	0.7	(0.51-0.97)	0.51	0.97	0.03
ES〇SSH1〇ID〇024259	0.68	(0.49-0.94)	0.49	0.94	0.022
ES〇ASPH〇ID〇083975	1.5	(1.1-2)	1.1	2	0.019
AD〇ALG1〇ID〇033877	1.5	(1.1-2.1)	1.1	2.1	0.016
AP〇YPEL3〇ID〇036066	1.6	(1.2-2.3)	1.2	2.3	0.0029
AP〇YPEL3〇ID〇036068	0.61	(0.44-0.85)	0.44	0.85	0.0029
AP〇PACSIN3〇ID〇015671	1.4	(1-1.9)	1	1.9	0.047
AP〇PACSIN3〇ID〇015672	0.7	(0.51-0.97)	0.51	0.97	0.032
AP〇SUOX〇ID〇022334	1.5	(1.1-2)	1.1	2	0.024
AP〇SUOX〇ID〇022333	0.69	(0.5-0.95)	0.5	0.95	0.024

## Sheet: FEMALE_LUSC
ID	HR	95% CI	HR.confint.lower	HR.confint.upper	p.value
ES〇CALD1〇ID〇081862	0.53	(0.29-0.98)	0.29	0.98	0.042
AT〇LINC00908〇ID〇045828	0.48	(0.26-0.89)	0.26	0.89	0.02
AT〇RASEF〇ID〇086676	2	(1.1-3.6)	1.1	3.6	0.031
AT〇RASEF〇ID〇086677	0.51	(0.28-0.94)	0.28	0.94	0.031
AP〇CMC2〇ID〇037703	2.1	(1.1-3.8)	1.1	3.8	0.018
AT〇C8orf34〇ID〇084098	1.9	(1-3.4)	1	3.4	0.046
AP〇DOCK9〇ID〇026172	0.51	(0.26-0.99)	0.26	0.99	0.046
AP〇FAM183A〇ID〇002142	0.53	(0.28-0.99)	0.28	0.99	0.045
AP〇FAM183A〇ID〇002141	2.2	(1.1-4.1)	1.1	4.1	0.017
AT〇LINC00908〇ID〇045829	2.1	(1.1-3.9)	1.1	3.9	0.018
ME〇FBLN5〇ID〇028892	0.41	(0.21-0.78)	0.21	0.78	0.0068
ES〇FN1〇ID〇057396	0.5	(0.27-0.93)	0.27	0.93	0.028
AT〇NR2C1〇ID〇023742	0.52	(0.28-0.96)	0.28	0.96	0.038
AT〇NR2C1〇ID〇023741	1.9	(1-3.6)	1	3.6	0.038
AP〇TMEM130〇ID〇080590	0.5	(0.26-0.94)	0.26	0.94	0.032
AP〇MAZ〇ID〇035937	2.1	(1.1-3.8)	1.1	3.8	0.021
AD〇TATDN1〇ID〇085100	0.49	(0.26-0.91)	0.26	0.91	0.024
ES〇ICMT〇ID〇000385	2.2	(1.2-4.1)	1.2	4.1	0.01
AD〇FAM115A〇ID〇082126	0.42	(0.22-0.8)	0.22	0.8	0.0086
ES〇MUM1〇ID〇046457	2.4	(1.3-4.5)	1.3	4.5	0.0064
ES〇FAM131A〇ID〇067936	2.7	(1.4-5)	1.4	5	0.0019
AT〇CATSPERD〇ID〇046925	2.2	(1.2-4)	1.2	4	0.013
AT〇CATSPERD〇ID〇046924	0.46	(0.25-0.85)	0.25	0.85	0.013
AP〇TMEM130〇ID〇080589	2	(1.1-3.7)	1.1	3.7	0.031
AP〇SULT1A3〇ID〇094136	0.53	(0.29-0.98)	0.29	0.98	0.044
ES〇CC2D2A〇ID〇068809	2.1	(1.1-3.9)	1.1	3.9	0.025
AT〇NAF1〇ID〇071008	1.9	(1.1-3.6)	1.1	3.6	0.034
AA〇CASP1〇ID〇018542	2	(1.1-3.7)	1.1	3.7	0.027
AT〇ARL17B〇ID〇042016	0.39	(0.21-0.74)	0.21	0.74	0.0041
ES〇SMTN〇ID〇061813	2	(1.1-3.7)	1.1	3.7	0.03
AT〇C4orf22〇ID〇069679	0.49	(0.25-0.95)	0.25	0.95	0.034
AA〇RUSC1〇ID〇008079	1.9	(1-3.6)	1	3.6	0.035
AT〇C4orf22〇ID〇069680	2.4	(1.2-4.8)	1.2	4.8	0.0092
ES〇TJP1〇ID〇029766	0.48	(0.26-0.89)	0.26	0.89	0.02
AT〇LAMP2〇ID〇089999	0.47	(0.26-0.88)	0.26	0.88	0.017
AP〇MAZ〇ID〇035938	0.43	(0.23-0.8)	0.23	0.8	0.0074
AT〇ATP5J〇ID〇060260	2	(1.1-3.8)	1.1	3.8	0.024
AT〇ATP5J〇ID〇060261	0.49	(0.26-0.91)	0.26	0.91	0.024
AT〇UROS〇ID〇013429	0.52	(0.28-0.97)	0.28	0.97	0.039
AT〇LRRC36〇ID〇037014	0.5	(0.27-0.92)	0.27	0.92	0.026
AT〇LRRC36〇ID〇037015	2	(1.1-3.8)	1.1	3.8	0.022
AT〇C8orf34〇ID〇084100	0.41	(0.22-0.76)	0.22	0.76	0.005
AP〇PSMG3〇ID〇078589	1.9	(1-3.5)	1	3.5	0.036
AT〇CAGE1〇ID〇075262	1.9	(1-3.7)	1	3.7	0.043
AT〇DTNA〇ID〇045097	2	(1-3.6)	1	3.6	0.035
AD〇SLC39A11〇ID〇043204	2	(1.1-3.8)	1.1	3.8	0.023
ES〇CEP78〇ID〇086657	2	(1.1-3.7)	1.1	3.7	0.024
AP〇GNAI2〇ID〇064970	2	(1.1-3.8)	1.1	3.8	0.023
AP〇GSDMD〇ID〇085420	1.9	(1-3.6)	1	3.6	0.037
AP〇ZBTB7B〇ID〇007876	0.34	(0.17-0.66)	0.17	0.66	0.0017
AP〇KAZN〇ID〇000732	0.45	(0.21-0.94)	0.21	0.94	0.034
AT〇CAV2〇ID〇081525	2.8	(1.5-5.3)	1.5	5.3	0.0017
AT〇CAV2〇ID〇081526	0.36	(0.19-0.68)	0.19	0.68	0.0017
RI〇VAMP4〇ID〇008994	0.45	(0.24-0.84)	0.24	0.84	0.013
ES〇FBLN5〇ID〇028894	0.43	(0.21-0.88)	0.21	0.88	0.02
ES〇MARK3〇ID〇029448	0.54	(0.29-1)	0.29	1	0.049
ES〇PRDX5〇ID〇016636	0.44	(0.23-0.84)	0.23	0.84	0.013
ES〇COL1A1〇ID〇265557	0.48	(0.23-0.99)	0.23	0.99	0.046
AT〇TMEM234〇ID〇001567	0.53	(0.28-0.98)	0.28	0.98	0.044
AT〇TRAPPC4〇ID〇019059	0.46	(0.25-0.85)	0.25	0.85	0.013
AT〇TRAPPC4〇ID〇019060	2.2	(1.2-4)	1.2	4	0.013
ES〇PGAP2〇ID〇014010	0.41	(0.21-0.78)	0.21	0.78	0.0071
ES〇UBOX5〇ID〇058571	1.9	(1-3.5)	1	3.5	0.036
ES〇NSFL1C〇ID〇058501	0.41	(0.22-0.77)	0.22	0.77	0.0052
AT〇MIPOL1〇ID〇027300	0.45	(0.24-0.84)	0.24	0.84	0.012
ES〇GLT8D2〇ID〇024091	0.43	(0.22-0.83)	0.22	0.83	0.012
ES〇EPB41L3〇ID〇044533	2	(1.1-3.7)	1.1	3.7	0.031
ES〇KDM1A〇ID〇001032	0.46	(0.24-0.87)	0.24	0.87	0.018
AD〇PRMT5〇ID〇026673	0.49	(0.27-0.91)	0.27	0.91	0.024
AD〇PRR13〇ID〇022042	2.2	(1.2-4.1)	1.2	4.1	0.013
RI〇PILRB〇ID〇080937	1.9	(1-3.6)	1	3.6	0.04
AT〇MORN1〇ID〇000253	2.1	(1.1-4.1)	1.1	4.1	0.027
AT〇TDRKH〇ID〇007660	1.9	(1-3.5)	1	3.5	0.04
ES〇ARMC10〇ID〇081156	0.51	(0.27-0.96)	0.27	0.96	0.036
AP〇CMC2〇ID〇037702	0.39	(0.21-0.73)	0.21	0.73	0.003
ES〇KIF13A〇ID〇075458	0.24	(0.12-0.48)	0.12	0.48	6.9e-05
AP〇NGFRAP1〇ID〇089729	2.2	(1.2-4.3)	1.2	4.3	0.016
AT〇BCO2〇ID〇018750	2	(1.1-3.9)	1.1	3.9	0.028
AT〇BCO2〇ID〇018749	0.49	(0.26-0.93)	0.26	0.93	0.028
ES〇HMCN1〇ID〇009219	2	(1.1-3.8)	1.1	3.8	0.028
AP〇XRCC3〇ID〇029493	0.53	(0.29-0.99)	0.29	0.99	0.047
ES〇CDH26〇ID〇060036	0.48	(0.23-1)	0.23	1	0.048
AP〇DUSP14〇ID〇040524	1.9	(1-3.4)	1	3.4	0.045
AD〇IFI35〇ID〇041177	2	(1.1-3.7)	1.1	3.7	0.025
AP〇USB1〇ID〇036622	2	(1.1-3.6)	1.1	3.6	0.026
AP〇USB1〇ID〇036621	0.5	(0.27-0.92)	0.27	0.92	0.026
AA〇GRK6〇ID〇074765	0.54	(0.29-0.99)	0.29	0.99	0.047
AP〇SSUH2〇ID〇063061	2.2	(1.2-4.3)	1.2	4.3	0.013
AP〇NME1_NME2〇ID〇042506	2	(1.1-3.7)	1.1	3.7	0.022
AP〇ARHGAP11A〇ID〇029814	1.9	(1-3.6)	1	3.6	0.048
AP〇ANAPC11〇ID〇044202	2.2	(1.2-4.2)	1.2	4.2	0.01
RI〇TK1〇ID〇043786	2.4	(1.3-4.5)	1.3	4.5	0.0073
AP〇CRISPLD1〇ID〇084227	0.45	(0.21-0.95)	0.21	0.95	0.035
RI〇RPL29〇ID〇065167	0.49	(0.26-0.93)	0.26	0.93	0.029
ES〇FAM96A〇ID〇031084	0.54	(0.3-1)	0.3	1	0.049
ES〇YIF1B〇ID〇049608	2	(1.1-3.6)	1.1	3.6	0.029
AP〇FGD3〇ID〇086888	0.51	(0.27-0.95)	0.27	0.95	0.035
AA〇LDB2〇ID〇068840	2.3	(1.2-4.5)	1.2	4.5	0.018
ES〇FRMD8〇ID〇016850	0.45	(0.23-0.87)	0.23	0.87	0.017
ES〇MUC1〇ID〇008019	2.2	(1.2-4)	1.2	4	0.016
ES〇LSR〇ID〇049088	2.3	(1.2-4.4)	1.2	4.4	0.0083
AD〇MTHFS〇ID〇032161	0.49	(0.26-0.91)	0.26	0.91	0.024
ES〇TMUB2〇ID〇041810	2.3	(1.2-4.5)	1.2	4.5	0.012
ES〇CARD8〇ID〇050715	0.5	(0.26-0.97)	0.26	0.97	0.042
RI〇ELP5〇ID〇038889	0.55	(0.3-1)	0.3	1	0.049
AP〇RBBP8〇ID〇044787	3.4	(1.7-6.7)	1.7	6.7	0.00047
AT〇CCDC180〇ID〇086996	0.46	(0.24-0.9)	0.24	0.9	0.023
ES〇DMKN〇ID〇049204	1.9	(1-3.5)	1	3.5	0.046
RI〇MROH7_TTC4〇ID〇003148	2.3	(1.2-4.2)	1.2	4.2	0.0096
ES〇ANK3〇ID〇011849	1.9	(1-3.6)	1	3.6	0.041
ES〇KIFC3〇ID〇036608	2.7	(1.4-5.2)	1.4	5.2	0.0021
AA〇TMEM175〇ID〇068428	1.9	(1-3.5)	1	3.5	0.042
ES〇MARCH6〇ID〇071564	0.49	(0.26-0.93)	0.26	0.93	0.028
