# Supplementary material for: Survival-associated alternative splicing signatures in non-small cell lung cancer
Source: Aging (Albany NY). 2020 Apr 13;12(7):5878–93. doi: 10.18632/aging.102983 (PMC7185095; doi:10.18632/aging.102983)
Supplement: Supplementary Table 6 [file aging-12-102983-s002..xlsx]

## Sheet: MALE_LUAD
Tumor												Normal
Num		CDS primer				AS primer				PSI		Num		CDS primer				AS primer				PSI
Number	GAPDH	CDS primer	∆Ct	-∆∆Ct	2-∆∆Ct	AS primer	∆Ct	-∆∆Ct	2-∆∆Ct	PSI		Number	GAPDH	CDS primer	∆Ct	-∆∆Ct	2-∆∆Ct	AS primer	∆Ct	-∆∆Ct	2-∆∆Ct	PSI
1	17.22	23.88	6.66	-0.06	0.959264	26.08	8.86	-2.26	0.208772	1.00045		1	17.33	24.13	6.8	-0.2	0.870551	28.48	11.15	-4.55	0.0426888	0.939734
	17.24	23.82	6.58	0.02	1.01396	26.14	8.9	-2.3	0.203063	0.219464			17.38	23.84	6.46	0.14	1.10191	28.58	11.2	-4.6	0.0412346	0.0429115
	17.33	23.89	6.56	0.04	1.02811	25.95	8.62	-2.02	0.246558	0.219367			17.34	24.18	6.84	-0.24	0.846745	28.42	11.08	-4.48	0.0448111	0.0456635
	GAPDH	CDS primer	∆Ct	-∆∆Ct	2-∆∆Ct	AS primer	∆Ct	-∆∆Ct	2-∆∆Ct	PSI			GAPDH	CDS primer	∆Ct	-∆∆Ct	2-∆∆Ct	AS primer	∆Ct	-∆∆Ct	2-∆∆Ct	PSI
2	17.52	23.76	6.24	0.36	1.28343	25.7	8.18	-1.58	0.334482	1.35441		2	17.54	23.97	6.43	0.17	1.12506	28.44	10.9	-4.3	0.0507658	1.31584
	17.59	23.84	6.25	0.35	1.27456	25.74	8.15	-1.55	0.34151	0.352519			17.72	23.9	6.18	0.42	1.33793	28.51	10.79	-4.19	0.0547879	0.0554482
	17.67	23.68	6.01	0.59	1.50525	25.66	7.99	-1.39	0.381565	0.260275			17.75	23.78	6.03	0.57	1.48452	28.39	10.64	-4.04	0.0607909	0.0421391
	GAPDH	CDS primer	∆Ct	-∆∆Ct	2-∆∆Ct	AS primer	∆Ct	-∆∆Ct	2-∆∆Ct	PSI			GAPDH	CDS primer	∆Ct	-∆∆Ct	2-∆∆Ct	AS primer	∆Ct	-∆∆Ct	2-∆∆Ct	PSI
3	18.12	24.22	6.1	0.5	1.41421	26.96	8.84	-2.24	0.211686	1.53712		3	18.13	24.18	6.05	0.55	1.46409	27.26	9.13	-2.53	0.173139	1.48979
	18.21	24.28	6.07	0.53	1.44393	27.01	8.8	-2.2	0.217638	0.230584			18.24	24.34	6.1	0.5	1.41421	27.27	9.03	-2.43	0.185565	0.191613
	18.33	24.12	5.79	0.81	1.75321	26.86	8.53	-1.93	0.262429	0.150011			18.43	24.36	5.93	0.67	1.59107	27.24	8.81	-2.21	0.216134	0.128617
	GAPDH	CDS primer	∆Ct	-∆∆Ct	2-∆∆Ct	AS primer	∆Ct	-∆∆Ct	2-∆∆Ct	PSI			GAPDH	CDS primer	∆Ct	-∆∆Ct	2-∆∆Ct	AS primer	∆Ct	-∆∆Ct	2-∆∆Ct	PSI
4	17.35	24.86	7.51	-0.91	0.532185	26.8	9.45	-2.85	0.138696	0.558523		4	17.39	24.85	7.46	-0.86	0.550953	28.57	11.18	-4.58	0.0418102	0.541767
	17.65	24.91	7.26	-0.66	0.632878	26.82	9.17	-2.57	0.168404	0.145803			17.77	25.17	7.4	-0.8	0.574349	28.62	10.85	-4.25	0.052556	0.0455867
	17.22	24.79	7.57	-0.97	0.510506	26.76	9.54	-2.94	0.130308	0.261051			17.34	24.94	7.6	-1	0.5	28.5	11.16	-4.56	0.0423939	0.0841445
	GAPDH	CDS primer	∆Ct	-∆∆Ct	2-∆∆Ct	AS primer	∆Ct	-∆∆Ct	2-∆∆Ct	PSI			GAPDH	CDS primer	∆Ct	-∆∆Ct	2-∆∆Ct	AS primer	∆Ct	-∆∆Ct	2-∆∆Ct	PSI
5	16.63	25.76	9.13	-2.53	0.173139	27.34	10.71	-4.11	0.0579118	0.171211		5	16.69	25.86	9.17	-2.57	0.168404	28.12	11.43	-4.83	0.0351581	0.175009
	16.75	25.86	9.11	-2.51	0.175556	27.41	10.66	-4.06	0.059954	0.0568073			16.88	25.76	8.88	-2.28	0.205898	28.23	11.35	-4.75	0.0371627	0.0351941
	16.53	25.73	9.2	-2.6	0.164938	27.38	10.85	-4.25	0.052556	0.331797			16.67	26	9.33	-2.73	0.150726	28.18	11.51	-4.91	0.0332616	0.201099
	GAPDH	CDS primer	∆Ct	-∆∆Ct	2-∆∆Ct	AS primer	∆Ct	-∆∆Ct	2-∆∆Ct	PSI			GAPDH	CDS primer	∆Ct	-∆∆Ct	2-∆∆Ct	AS primer	∆Ct	-∆∆Ct	2-∆∆Ct	PSI
6	16.71	25.45	8.74	-2.14	0.22688	28.24	11.53	-4.93	0.0328036	0.2322		6	16.76	25.61	8.85	-2.25	0.210224	28.98	12.22	-5.62	0.0203335	0.234557
	16.53	25.48	8.95	-2.35	0.196146	28.11	11.58	-4.98	0.0316862	0.0359249			16.58	25.53	8.95	-2.35	0.196146	29.02	12.44	-5.84	0.0174576	0.0206573
	16.88	25.35	8.47	-1.87	0.273573	28.01	11.13	-4.53	0.0432847	0.154715			16.99	25.34	8.35	-1.75	0.297302	28.96	11.97	-5.37	0.0241807	0.0880691
	GAPDH	CDS primer	∆Ct	-∆∆Ct	2-∆∆Ct	AS primer	∆Ct	-∆∆Ct	2-∆∆Ct	PSI			GAPDH	CDS primer	∆Ct	-∆∆Ct	2-∆∆Ct	AS primer	∆Ct	-∆∆Ct	2-∆∆Ct	PSI
7	17.43	25.06	7.63	-1.03	0.48971	27.29	9.86	-3.26	0.104386	0.501223		7	17.52	25.38	7.86	-1.26	0.417544	27.95	10.43	-3.83	0.0703162	0.445227
	17.56	25.14	7.58	-0.98	0.50698	27.29	9.73	-3.13	0.114229	0.109397			17.59	25.18	7.59	-0.99	0.503478	28.04	10.45	-3.85	0.0693481	0.0698316
	17.38	24.96	7.58	-0.98	0.50698	27.17	9.79	-3.19	0.109576	0.21826			17.39	25.26	7.87	-1.27	0.41466	27.83	10.44	-3.84	0.0698304	0.156845
	GAPDH	CDS primer	∆Ct	-∆∆Ct	2-∆∆Ct	AS primer	∆Ct	-∆∆Ct	2-∆∆Ct	PSI			GAPDH	CDS primer	∆Ct	-∆∆Ct	2-∆∆Ct	AS primer	∆Ct	-∆∆Ct	2-∆∆Ct	PSI
8	16.58	24.63	8.05	-1.45	0.366021	26.53	9.95	-3.35	0.098073	0.370326		8	16.69	24.66	7.97	-1.37	0.386891	27.36	10.67	-4.07	0.0595399	0.356702
	16.41	24.66	8.25	-1.65	0.31864	26.58	10.17	-3.57	0.0842021	0.0965319			16.43	24.71	8.28	-1.68	0.312083	27.12	10.69	-4.09	0.0587202	0.0615944
	16.65	24.48	7.83	-1.23	0.426317	26.47	9.82	-3.22	0.107321	0.260667			16.74	24.77	8.03	-1.43	0.371131	27.25	10.51	-3.91	0.0665231	0.172678
	GAPDH	CDS primer	∆Ct	-∆∆Ct	2-∆∆Ct	AS primer	∆Ct	-∆∆Ct	2-∆∆Ct	PSI			GAPDH	CDS primer	∆Ct	-∆∆Ct	2-∆∆Ct	AS primer	∆Ct	-∆∆Ct	2-∆∆Ct	PSI
9	16.55	24.88	8.33	-1.73	0.301452	26.56	10.01	-3.41	0.0940779	0.289371		9	16.59	25.12	8.53	-1.93	0.262429	27.47	10.88	-4.28	0.0514744	0.289596
	16.61	24.99	8.38	-1.78	0.291183	26.66	10.05	-3.45	0.0915054	0.0905182			16.69	24.7	8.01	-1.41	0.376312	27.57	10.88	-4.28	0.0514744	0.0480612
	16.41	24.87	8.46	-1.86	0.275476	26.55	10.14	-3.54	0.0859714	0.312811			16.45	25.17	8.72	-2.12	0.230047	27.65	11.2	-4.6	0.0412346	0.165959
	GAPDH	CDS primer	∆Ct	-∆∆Ct	2-∆∆Ct	AS primer	∆Ct	-∆∆Ct	2-∆∆Ct	PSI			GAPDH	CDS primer	∆Ct	-∆∆Ct	2-∆∆Ct	AS primer	∆Ct	-∆∆Ct	2-∆∆Ct	PSI
10	14.82	24.19	9.37	-2.77	0.146604	26.11	11.29	-4.69	0.0387409	0.139182		10	14.93	24.21	9.28	-2.68	0.156041	27.54	12.61	-6.01	0.0155171	0.145853
	14.75	24.29	9.54	-2.94	0.130308	26.19	11.44	-4.84	0.0349152	0.0362714			14.81	24.6	9.79	-3.19	0.109576	27.68	12.87	-6.27	0.0129581	0.0140258
	14.64	24.07	9.43	-2.83	0.140632	26.07	11.43	-4.83	0.0351581	0.260605			14.66	23.8	9.14	-2.54	0.171943	27.46	12.8	-6.2	0.0136024	0.0961641
	GAPDH	CDS primer	∆Ct	-∆∆Ct	2-∆∆Ct	AS primer	∆Ct	-∆∆Ct	2-∆∆Ct	PSI			GAPDH	CDS primer	∆Ct	-∆∆Ct	2-∆∆Ct	AS primer	∆Ct	-∆∆Ct	2-∆∆Ct	PSI
11	15.89	24.85	8.96	-2.36	0.194791	27.93	12.04	-5.44	0.0230355	0.201741		11	15.95	25.16	9.21	-2.61	0.163799	27.9	11.95	-5.35	0.0245183	0.174633
	16.01	24.92	8.91	-2.31	0.20166	27.04	11.03	-4.43	0.0463914	0.0313719			16.07	25.08	9.01	-2.41	0.188156	27.93	11.86	-5.26	0.0260965	0.0252741
	15.96	24.82	8.86	-2.26	0.208772	27.9	11.94	-5.34	0.0246888	0.155506			15.99	25.13	9.14	-2.54	0.171943	27.9	11.91	-5.31	0.0252076	0.144727
	GAPDH	CDS primer	∆Ct	-∆∆Ct	2-∆∆Ct	AS primer	∆Ct	-∆∆Ct	2-∆∆Ct	PSI			GAPDH	CDS primer	∆Ct	-∆∆Ct	2-∆∆Ct	AS primer	∆Ct	-∆∆Ct	2-∆∆Ct	PSI
12	17.39	24.62	7.23	-0.63	0.646176	26.21	8.82	-2.22	0.214641	0.70511		12	17.45	24.32	6.87	-0.27	0.82932	27.09	9.64	-3.04	0.121582	0.71311
	17.46	24.63	7.17	-0.57	0.673617	26.23	8.77	-2.17	0.222211	0.228951			17.49	24.82	7.33	-0.73	0.602904	27.2	9.71	-3.11	0.115824	0.12903
	17.59	24.52	6.93	-0.33	0.795536	26.19	8.6	-2	0.25	0.324702			17.66	24.76	7.1	-0.5	0.707107	27	9.34	-2.74	0.149685	0.18094
	GAPDH	CDS primer	∆Ct	-∆∆Ct	2-∆∆Ct	AS primer	∆Ct	-∆∆Ct	2-∆∆Ct	PSI			GAPDH	CDS primer	∆Ct	-∆∆Ct	2-∆∆Ct	AS primer	∆Ct	-∆∆Ct	2-∆∆Ct	PSI
13	17.24	23.9	6.66	-0.06	0.959264	25.44	8.2	-1.6	0.329877	0.98196		13	17.28	23.87	6.59	0.01	1.00696	26.43	9.15	-2.55	0.170755	0.94559
	17.38	23.96	6.58	0.02	1.01396	25.49	8.11	-1.51	0.351111	0.342422			17.44	24.1	6.66	-0.06	0.959264	26.53	9.09	-2.49	0.178006	0.179409
	17.25	23.89	6.64	-0.04	0.972655	25.38	8.13	-1.53	0.346277	0.348713			17.3	24.1	6.8	-0.2	0.870551	26.3	9	-2.4	0.189465	0.189732
	GAPDH	CDS primer	∆Ct	-∆∆Ct	2-∆∆Ct	AS primer	∆Ct	-∆∆Ct	2-∆∆Ct	PSI			GAPDH	CDS primer	∆Ct	-∆∆Ct	2-∆∆Ct	AS primer	∆Ct	-∆∆Ct	2-∆∆Ct	PSI
14	17.33	25.62	8.29	-1.69	0.309927	28.1	10.77	-4.17	0.0555527	0.301353		14	17.44	25.73	8.29	-1.69	0.309927	27.87	10.43	-3.83	0.0703162	0.301896
	17.22	25.74	8.52	-1.92	0.264255	28.19	10.97	-4.37	0.0483614	0.0549017			17.25	25.51	8.26	-1.66	0.316439	27.99	10.74	-4.14	0.0567199	0.0672928
	17.42	25.62	8.2	-1.6	0.329877	28.06	10.64	-4.04	0.0607909	0.182184			17.46	25.9	8.44	-1.84	0.279322	27.8	10.34	-3.74	0.0748424	0.222901
	GAPDH	CDS primer	∆Ct	-∆∆Ct	2-∆∆Ct	AS primer	∆Ct	-∆∆Ct	2-∆∆Ct	PSI			GAPDH	CDS primer	∆Ct	-∆∆Ct	2-∆∆Ct	AS primer	∆Ct	-∆∆Ct	2-∆∆Ct	PSI
15	15.59	25.64	10.05	-3.45	0.0915054	27.92	12.33	-5.73	0.0188407	0.102257		15	15.72	25.89	10.17	-3.57	0.0842021	28.62	12.9	-6.3	0.0126914	0.0990621
	15.76	25.69	9.93	-3.33	0.0994421	27.91	12.15	-5.55	0.0213444	0.0215678			15.87	25.6	9.73	-3.13	0.114229	28.74	12.87	-6.27	0.0129581	0.013546
	15.86	25.57	9.71	-3.11	0.115824	27.81	11.95	-5.35	0.0245183	0.210918			15.88	25.82	9.94	-3.34	0.0987552	28.54	12.66	-6.06	0.0149885	0.136743
	GAPDH	CDS primer	∆Ct	-∆∆Ct	2-∆∆Ct	AS primer	∆Ct	-∆∆Ct	2-∆∆Ct	PSI			GAPDH	CDS primer	∆Ct	-∆∆Ct	2-∆∆Ct	AS primer	∆Ct	-∆∆Ct	2-∆∆Ct	PSI
16	18.19	24.18	5.99	0.61	1.52626	26.78	8.59	-1.99	0.251739	1.53912		16	18.22	24.08	5.86	0.74	1.67018	27.77	9.55	-2.95	0.129408	1.509
	18.15	24.22	6.07	0.53	1.44393	26.86	8.71	-2.11	0.231647	0.249826			18.2	24.46	6.26	0.34	1.26576	27.8	9.6	-3	0.125	0.130398
	18.22	24.1	5.88	0.72	1.64718	26.73	8.51	-1.91	0.266093	0.162317			18.26	24.19	5.93	0.67	1.59107	27.73	9.47	-2.87	0.136787	0.0864136
	GAPDH	CDS primer	∆Ct	-∆∆Ct	2-∆∆Ct	AS primer	∆Ct	-∆∆Ct	2-∆∆Ct	PSI			GAPDH	CDS primer	∆Ct	-∆∆Ct	2-∆∆Ct	AS primer	∆Ct	-∆∆Ct	2-∆∆Ct	PSI
17	18.41	24.45	6.04	0.56	1.47427	26.73	8.32	-1.72	0.303549	1.58513		17	18.55	24.18	5.63	0.97	1.95884	27.26	8.71	-2.11	0.231647	1.78585
	18.53	24.53	6	0.6	1.51572	26.8	8.27	-1.67	0.314253	0.32543			18.58	24.54	5.96	0.64	1.55833	27.33	8.75	-2.15	0.225313	0.242256
	18.62	24.4	5.78	0.82	1.76541	26.7	8.08	-1.48	0.358489	0.205302			18.68	24.4	5.72	0.88	1.84038	27.17	8.49	-1.89	0.269807	0.135653
	GAPDH	CDS primer	∆Ct	-∆∆Ct	2-∆∆Ct	AS primer	∆Ct	-∆∆Ct	2-∆∆Ct	PSI			GAPDH	CDS primer	∆Ct	-∆∆Ct	2-∆∆Ct	AS primer	∆Ct	-∆∆Ct	2-∆∆Ct	PSI
18	17.3	24.47	7.17	-0.57	0.673617	26.87	9.57	-2.97	0.127627	0.645122		18	17.43	24.64	7.21	-0.61	0.655197	28.17	10.74	-4.14	0.0567199	0.66596
	17.25	24.55	7.3	-0.7	0.615572	26.98	9.73	-3.13	0.114229	0.121146			17.36	24.83	7.47	-0.87	0.547147	28.25	10.89	-4.29	0.0511189	0.0522918
	17.16	24.39	7.23	-0.63	0.646176	26.8	9.64	-3.04	0.121582	0.187787			17.21	24.14	6.93	-0.33	0.795536	28.16	10.95	-4.35	0.0490365	0.0785209
	GAPDH	CDS primer	∆Ct	-∆∆Ct	2-∆∆Ct	AS primer	∆Ct	-∆∆Ct	2-∆∆Ct	PSI			GAPDH	CDS primer	∆Ct	-∆∆Ct	2-∆∆Ct	AS primer	∆Ct	-∆∆Ct	2-∆∆Ct	PSI
19	17.13	24.57	7.44	-0.84	0.558644	27.12	9.99	-3.39	0.0953912	0.58816		19	17.32	24.54	7.22	-0.62	0.650671	28.12	10.8	-4.2	0.0544094	0.678338
	17.24	24.56	7.32	-0.72	0.607097	27.04	9.8	-3.2	0.108819	0.0983611			17.21	24.63	7.42	-0.82	0.566442	28.11	10.9	-4.3	0.0507658	0.0546318
	17.15	24.49	7.34	-0.74	0.598739	27.21	10.06	-3.46	0.0908733	0.167235			17.32	24.21	6.89	-0.29	0.817902	28.01	10.69	-4.09	0.0587202	0.0805377
	GAPDH	CDS primer	∆Ct	-∆∆Ct	2-∆∆Ct	AS primer	∆Ct	-∆∆Ct	2-∆∆Ct	PSI			GAPDH	CDS primer	∆Ct	-∆∆Ct	2-∆∆Ct	AS primer	∆Ct	-∆∆Ct	2-∆∆Ct	PSI
20	17.32	24.27	6.95	-0.35	0.784584	26.13	8.81	-2.21	0.216134	0.732944		20	17.35	24.74	7.39	-0.79	0.578344	27.87	10.52	-3.92	0.0660636	0.606176
	17.26	24.35	7.09	-0.49	0.712025	26.11	8.85	-2.25	0.210224	0.213667			17.25	24.58	7.33	-0.73	0.602904	27.91	10.66	-4.06	0.059954	0.06313
	17.41	24.52	7.11	-0.51	0.702222	26.23	8.82	-2.22	0.214641	0.291518			17.31	24.56	7.25	-0.65	0.63728	27.89	10.58	-3.98	0.0633725	0.104145
AT〇HNRNPLL〇ID〇053259
DEAS												CDS
Primer pair 1												Primer pair 1
	Sequence (5'->3')	Template strand	Length	Start	Stop	Tm	GC%	Self complementarity	Self 3' complementarity				Sequence (5'->3')	Template strand	Length	Start	Stop	Tm	GC%	Self complementarity	Self 3' complementarity
Forward primer	AGTGCCCCCTACTGGTATGT	Plus	20	167	186	59.96	55	4	2			Forward primer	TTTCACCCGTCGTCCATGTT	Plus	20	221	240	59.89	50	4	0
Reverse primer	GGCTTTTTGCTGATGCCGAT	Minus	20	452	433	59.83	50	3	2			Reverse primer	CCTGGCCGAGTGATCCTTTT	Minus	20	470	451	60.04	55	4	0
Product length	286											Product length	250
Primer pair 2												Primer pair 2
	Sequence (5'->3')	Template strand	Length	Start	Stop	Tm	GC%	Self complementarity	Self 3' complementarity				Sequence (5'->3')	Template strand	Length	Start	Stop	Tm	GC%	Self complementarity	Self 3' complementarity
Forward primer	ACCTTGAACATTAGTGCCCCC	Plus	21	155	175	60.27	52.38	4	0			Forward primer	GAATATGCACGGCCAACTCG	Plus	20	718	737	59.7	55	4	2
Reverse primer	TGAATGTGTGGGCTCCTTGT	Minus	20	230	211	59.52	50	2	0			Reverse primer	CTTGTCTCTGGCGACCCTTT	Minus	20	829	810	59.96	55	4	0
Product length	76											Product length	112

## Sheet: FEMALE_LUAD 
Tumor												Normal
Num		CDS primer				AS primer				PSI		Num		CDS primer				AS primer				PSI
Number	GAPDH	CDS primer	∆Ct	-∆∆Ct	2-∆∆Ct	AS primer	∆Ct	-∆∆Ct	2-∆∆Ct	PSI		Number	GAPDH	CDS primer	∆Ct	-∆∆Ct	2-∆∆Ct	AS primer	∆Ct	-∆∆Ct	2-∆∆Ct	PSI
1	16.46	24.91	8.45	0	1	25.48	9.02	-0.57	0.673617	1.00078		1	17.32	24.77	7.45	1	2	25.24	7.92	0.53	1.44393	2.02831
	16.47	24.85	8.38	0.07	1.04972	25.47	9	-0.55	0.68302	0.657403			17.4	24.79	7.39	1.06	2.08493	25.26	7.86	0.59	1.50525	1.44157
	16.32	24.84	8.52	-0.07	0.952638	25.47	9.15	-0.7	0.615572	0.343113			17.29	24.74	7.45	1	2	25.28	7.99	0.46	1.37554	0.289274
	GAPDH	CDS primer	∆Ct	-∆∆Ct	2-∆∆Ct	AS primer	∆Ct	-∆∆Ct	2-∆∆Ct	PSI			GAPDH	CDS primer	∆Ct	-∆∆Ct	2-∆∆Ct	AS primer	∆Ct	-∆∆Ct	2-∆∆Ct	PSI
2	16.76	23.35	6.59	1.86	3.63008	23.63	6.87	1.58	2.9897	3.68952		2	17.27	23.31	6.04	2.41	5.31474	23.6	6.33	2.12	4.34694	5.39137
	16.79	23.35	6.56	1.89	3.70635	23.62	6.83	1.62	3.07375	3.01772			17.28	23.34	6.06	2.39	5.24157	23.58	6.3	2.15	4.43828	4.35744
	16.74	23.29	6.55	1.9	3.73213	23.61	6.87	1.58	2.9897	0.182085			17.22	23.18	5.96	2.49	5.61778	23.57	6.35	2.1	4.28709	0.191775
	GAPDH	CDS primer	∆Ct	-∆∆Ct	2-∆∆Ct	AS primer	∆Ct	-∆∆Ct	2-∆∆Ct	PSI			GAPDH	CDS primer	∆Ct	-∆∆Ct	2-∆∆Ct	AS primer	∆Ct	-∆∆Ct	2-∆∆Ct	PSI
3	16.07	23.18	7.11	1.34	2.53151	23.57	7.5	0.95	1.93187	2.58499		3	16.79	23.12	6.33	2.12	4.34694	23.37	6.58	1.87	3.65533	4.45267
	16.2	23.27	7.07	1.38	2.60268	23.58	7.38	1.07	2.09943	1.97012			16.8	23.15	6.35	2.1	4.28709	23.36	6.56	1.89	3.70635	3.63902
	16.02	23.08	7.06	1.39	2.62079	23.56	7.54	0.91	1.87905	0.237864			16.77	22.98	6.21	2.24	4.72397	23.39	6.62	1.83	3.55537	0.182734
	GAPDH	CDS primer	∆Ct	-∆∆Ct	2-∆∆Ct	AS primer	∆Ct	-∆∆Ct	2-∆∆Ct	PSI			GAPDH	CDS primer	∆Ct	-∆∆Ct	2-∆∆Ct	AS primer	∆Ct	-∆∆Ct	2-∆∆Ct	PSI
4	17.1	23.14	6.04	2.41	5.31474	23.39	6.29	2.16	4.46915	5.31611		4	16.99	23.04	6.05	2.4	5.27803	23.38	6.39	2.06	4.16986	5.19388
	17.12	23.2	6.08	2.37	5.16941	23.4	6.28	2.17	4.50023	4.39915			17.04	23.11	6.07	2.38	5.20537	23.39	6.35	2.1	4.28709	4.06303
	17.01	23.01	6	2.45	5.46416	23.38	6.37	2.08	4.22807	0.172486			16.86	22.96	6.1	2.35	5.09824	23.41	6.55	1.9	3.73213	0.217728
	GAPDH	CDS primer	∆Ct	-∆∆Ct	2-∆∆Ct	AS primer	∆Ct	-∆∆Ct	2-∆∆Ct	PSI			GAPDH	CDS primer	∆Ct	-∆∆Ct	2-∆∆Ct	AS primer	∆Ct	-∆∆Ct	2-∆∆Ct	PSI
5	16.34	24.75	8.41	0.04	1.02811	25.45	9.11	-0.66	0.632878	1.05971		5	17.05	24.66	7.61	0.84	1.79005	25.03	7.98	0.47	1.38511	1.78184
	16.45	24.79	8.34	0.11	1.07923	25.45	9	-0.55	0.68302	0.643824			17.08	24.69	7.61	0.84	1.79005	25.05	7.97	0.48	1.39474	1.36951
	16.34	24.69	8.35	0.1	1.07177	25.49	9.15	-0.7	0.615572	0.39245			16.99	24.62	7.63	0.82	1.76541	25.03	8.04	0.41	1.32869	0.231403
	GAPDH	CDS primer	∆Ct	-∆∆Ct	2-∆∆Ct	AS primer	∆Ct	-∆∆Ct	2-∆∆Ct	PSI			GAPDH	CDS primer	∆Ct	-∆∆Ct	2-∆∆Ct	AS primer	∆Ct	-∆∆Ct	2-∆∆Ct	PSI
6	16.55	23.79	7.24	1.21	2.31338	24.28	7.73	0.72	1.64718	2.40777		6	17.52	23.68	6.16	2.29	4.89056	23.99	6.47	1.98	3.94493	4.93639
	16.68	23.88	7.2	1.25	2.37841	24.29	7.61	0.84	1.79005	1.67244			17.62	23.78	6.16	2.29	4.89056	23.98	6.36	2.09	4.25748	3.96959
	16.49	23.6	7.11	1.34	2.53151	24.28	7.79	0.66	1.58008	0.305399			17.44	23.56	6.12	2.33	5.02805	24	6.56	1.89	3.70635	0.195852
	GAPDH	CDS primer	∆Ct	-∆∆Ct	2-∆∆Ct	AS primer	∆Ct	-∆∆Ct	2-∆∆Ct	PSI			GAPDH	CDS primer	∆Ct	-∆∆Ct	2-∆∆Ct	AS primer	∆Ct	-∆∆Ct	2-∆∆Ct	PSI
7	18.09	24.06	5.97	2.48	5.57897	24.72	6.63	1.82	3.53081	5.4916		7	17.98	24	6.02	2.43	5.38893	24.36	6.38	2.07	4.19887	5.46663
	18.16	24.12	5.96	2.49	5.61778	24.73	6.57	1.88	3.68075	3.47195			18.05	24.09	6.04	2.41	5.31474	24.35	6.3	2.15	4.43828	4.2404
	17.96	24.01	6.05	2.4	5.27803	24.73	6.77	1.68	3.20428	0.367771			17.94	23.88	5.94	2.51	5.6962	24.36	6.42	2.03	4.08405	0.224312
	GAPDH	CDS primer	∆Ct	-∆∆Ct	2-∆∆Ct	AS primer	∆Ct	-∆∆Ct	2-∆∆Ct	PSI			GAPDH	CDS primer	∆Ct	-∆∆Ct	2-∆∆Ct	AS primer	∆Ct	-∆∆Ct	2-∆∆Ct	PSI
8	18.16	23.48	5.32	3.13	8.75435	23.85	5.69	2.76	6.77396	8.29319		8	18.11	23.46	5.35	3.1	8.57419	23.74	5.63	2.82	7.06162	8.30464
	18.17	23.67	5.5	2.95	7.72749	23.88	5.71	2.74	6.6807	6.66596			18.15	23.6	5.45	3	8	23.77	5.62	2.83	7.11074	6.89013
	18.15	23.53	5.38	3.07	8.39773	23.89	5.74	2.71	6.54322	0.196213			18.03	23.42	5.39	3.06	8.33973	23.78	5.75	2.7	6.49802	0.170328
	GAPDH	CDS primer	∆Ct	-∆∆Ct	2-∆∆Ct	AS primer	∆Ct	-∆∆Ct	2-∆∆Ct	PSI			GAPDH	CDS primer	∆Ct	-∆∆Ct	2-∆∆Ct	AS primer	∆Ct	-∆∆Ct	2-∆∆Ct	PSI
9	17.3	24.95	7.65	0.8	1.7411	25.5	8.2	0.25	1.18921	1.76174		9	16.2	24.9	8.7	-0.25	0.840896	25.4	9.2	-0.75	0.594604	0.84546
	17.33	24.99	7.66	0.79	1.72907	25.52	8.19	0.26	1.19748	1.19196			16.33	24.95	8.62	-0.17	0.888843	25.44	9.11	-0.66	0.632878	0.591543
	17.29	24.88	7.59	0.86	1.81504	25.49	8.2	0.25	1.18921	0.323416			16.1	24.86	8.76	-0.31	0.806642	25.42	9.32	-0.87	0.547147	0.30033
	GAPDH	CDS primer	∆Ct	-∆∆Ct	2-∆∆Ct	AS primer	∆Ct	-∆∆Ct	2-∆∆Ct	PSI			GAPDH	CDS primer	∆Ct	-∆∆Ct	2-∆∆Ct	AS primer	∆Ct	-∆∆Ct	2-∆∆Ct	PSI
10	16.75	23.66	6.91	1.54	2.90795	23.95	7.2	1.25	2.37841	2.9285		10	16.14	23.61	7.47	0.98	1.97247	23.93	7.79	0.66	1.58008	2.05725
	16.78	23.65	6.87	1.58	2.9897	23.97	7.19	1.26	2.39496	2.31561			16.21	23.61	7.4	1.05	2.07053	23.88	7.67	0.78	1.71713	1.64057
	16.71	23.63	6.92	1.53	2.88786	24.04	7.33	1.12	2.17347	0.209283			16.14	23.5	7.36	1.09	2.12874	23.89	7.75	0.7	1.6245	0.202539
	GAPDH	CDS primer	∆Ct	-∆∆Ct	2-∆∆Ct	AS primer	∆Ct	-∆∆Ct	2-∆∆Ct	PSI			GAPDH	CDS primer	∆Ct	-∆∆Ct	2-∆∆Ct	AS primer	∆Ct	-∆∆Ct	2-∆∆Ct	PSI
11	18.11	24.11	6	2.45	5.46416	24.82	6.71	1.74	3.34035	5.13973		11	16.73	24.1	7.37	1.08	2.11404	24.55	7.82	0.63	1.54756	2.13909
	18.14	24.31	6.17	2.28	4.85678	24.82	6.68	1.77	3.41054	3.29641			16.86	24.24	7.38	1.07	2.09943	24.57	7.71	0.74	1.67018	1.57433
	18.01	24.11	6.1	2.35	5.09824	24.81	6.8	1.65	3.13834	0.358641			16.7	24.01	7.31	1.14	2.20381	24.56	7.86	0.59	1.50525	0.26402
	GAPDH	CDS primer	∆Ct	-∆∆Ct	2-∆∆Ct	AS primer	∆Ct	-∆∆Ct	2-∆∆Ct	PSI			GAPDH	CDS primer	∆Ct	-∆∆Ct	2-∆∆Ct	AS primer	∆Ct	-∆∆Ct	2-∆∆Ct	PSI
12	17.62	23.32	5.7	2.75	6.72717	23.6	5.98	2.47	5.54044	6.71297		12	16.45	23.3	6.85	1.6	3.03143	23.62	7.17	1.28	2.42839	3.01921
	17.67	23.41	5.74	2.71	6.54322	23.58	5.91	2.54	5.81589	5.6195			16.46	23.38	6.92	1.53	2.88786	23.61	7.15	1.3	2.46229	2.39603
	17.58	23.25	5.67	2.78	6.86852	23.57	5.99	2.46	5.50217	0.162889			16.38	23.18	6.8	1.65	3.13834	23.63	7.25	1.2	2.2974	0.206406
	GAPDH	CDS primer	∆Ct	-∆∆Ct	2-∆∆Ct	AS primer	∆Ct	-∆∆Ct	2-∆∆Ct	PSI			GAPDH	CDS primer	∆Ct	-∆∆Ct	2-∆∆Ct	AS primer	∆Ct	-∆∆Ct	2-∆∆Ct	PSI
13	17.23	24.72	7.49	0.96	1.94531	25.43	8.2	0.25	1.18921	1.92896		13	16.29	24.66	8.37	0.08	1.05702	25.11	8.82	-0.37	0.773782	1.06442
	17.27	24.85	7.58	0.87	1.82766	25.39	8.12	0.33	1.25701	1.20907			16.37	24.71	8.34	0.11	1.07923	25.09	8.72	-0.27	0.82932	0.781788
	17.2	24.64	7.44	1.01	2.01391	25.41	8.21	0.24	1.18099	0.373201			16.21	24.58	8.37	0.08	1.05702	25.09	8.88	-0.43	0.742262	0.265528
	GAPDH	CDS primer	∆Ct	-∆∆Ct	2-∆∆Ct	AS primer	∆Ct	-∆∆Ct	2-∆∆Ct	PSI			GAPDH	CDS primer	∆Ct	-∆∆Ct	2-∆∆Ct	AS primer	∆Ct	-∆∆Ct	2-∆∆Ct	PSI
14	16.66	23.88	7.22	1.23	2.34567	24.42	7.76	0.69	1.61328	2.24602		14	16.36	23.81	7.45	1	2	24.18	7.82	0.63	1.54756	1.96824
	16.76	24.07	7.31	1.14	2.20381	24.41	7.65	0.8	1.7411	1.61297			16.49	23.95	7.46	0.99	1.98618	24.17	7.68	0.77	1.70527	1.53648
	16.53	23.85	7.32	1.13	2.18859	24.41	7.88	0.57	1.48452	0.281855			16.21	23.72	7.51	0.94	1.91853	24.22	8.01	0.44	1.3566	0.219363
	GAPDH	CDS primer	∆Ct	-∆∆Ct	2-∆∆Ct	AS primer	∆Ct	-∆∆Ct	2-∆∆Ct	PSI			GAPDH	CDS primer	∆Ct	-∆∆Ct	2-∆∆Ct	AS primer	∆Ct	-∆∆Ct	2-∆∆Ct	PSI
15	16.87	24.58	7.71	0.74	1.67018	25.12	8.25	0.2	1.1487	1.7215		15	16.6	24.47	7.87	0.58	1.49485	24.92	8.32	0.13	1.09429	1.50915
	16.92	24.56	7.64	0.81	1.75321	25.11	8.19	0.26	1.19748	1.14936			16.63	24.52	7.89	0.56	1.47427	24.91	8.28	0.17	1.12506	1.09953
	16.82	24.47	7.65	0.8	1.7411	25.13	8.31	0.14	1.10191	0.332348			16.57	24.38	7.81	0.64	1.55833	24.91	8.34	0.11	1.07923	0.271426
	GAPDH	CDS primer	∆Ct	-∆∆Ct	2-∆∆Ct	AS primer	∆Ct	-∆∆Ct	2-∆∆Ct	PSI			GAPDH	CDS primer	∆Ct	-∆∆Ct	2-∆∆Ct	AS primer	∆Ct	-∆∆Ct	2-∆∆Ct	PSI
16	16.99	24.8	7.81	0.64	1.55833	25.51	8.52	-0.07	0.952638	1.68062		16	17.37	24.67	7.3	1.15	2.21914	25.08	7.71	0.74	1.67018	2.23483
	17.09	24.78	7.69	0.76	1.69349	25.51	8.42	0.03	1.02101	0.968894			17.44	24.75	7.31	1.14	2.20381	25.06	7.62	0.83	1.77769	1.67598
	16.97	24.58	7.61	0.84	1.79005	25.52	8.55	-0.1	0.933033	0.423491			17.29	24.55	7.26	1.19	2.28153	25.08	7.79	0.66	1.58008	0.250062
	GAPDH	CDS primer	∆Ct	-∆∆Ct	2-∆∆Ct	AS primer	∆Ct	-∆∆Ct	2-∆∆Ct	PSI			GAPDH	CDS primer	∆Ct	-∆∆Ct	2-∆∆Ct	AS primer	∆Ct	-∆∆Ct	2-∆∆Ct	PSI
17	18.01	24.39	6.38	2.07	4.19887	25.08	7.07	1.38	2.60268	4.12239		17	16.65	24.37	7.72	0.73	1.65864	24.75	8.1	0.35	1.27456	1.58108
	18.08	24.49	6.41	2.04	4.11246	25.08	7	1.45	2.73208	2.63982			16.66	24.47	7.81	0.64	1.55833	24.77	8.11	0.34	1.26576	1.22967
	17.99	24.42	6.43	2.02	4.05584	25.07	7.08	1.37	2.58471	0.359637			16.51	24.35	7.84	0.61	1.52626	24.76	8.25	0.2	1.1487	0.222256
	GAPDH	CDS primer	∆Ct	-∆∆Ct	2-∆∆Ct	AS primer	∆Ct	-∆∆Ct	2-∆∆Ct	PSI			GAPDH	CDS primer	∆Ct	-∆∆Ct	2-∆∆Ct	AS primer	∆Ct	-∆∆Ct	2-∆∆Ct	PSI
18	16	25.04	9.04	-0.59	0.664343	25.61	9.61	-1.16	0.447513	0.636141		18	17.78	24.95	7.17	1.28	2.42839	25.39	7.61	0.84	1.79005	2.29918
	16.02	25.14	9.12	-0.67	0.628507	25.63	9.61	-1.16	0.447513	0.437523			17.78	25.07	7.29	1.16	2.23457	25.37	7.59	0.86	1.81504	1.75076
	15.91	25.06	9.15	-0.7	0.615572	25.62	9.71	-1.26	0.417544	0.312223			17.65	24.94	7.29	1.16	2.23457	25.38	7.73	0.72	1.64718	0.23853
	GAPDH	CDS primer	∆Ct	-∆∆Ct	2-∆∆Ct	AS primer	∆Ct	-∆∆Ct	2-∆∆Ct	PSI			GAPDH	CDS primer	∆Ct	-∆∆Ct	2-∆∆Ct	AS primer	∆Ct	-∆∆Ct	2-∆∆Ct	PSI
19	17.33	24.18	6.85	1.6	3.03143	24.97	7.64	0.81	1.75321	2.8766		19	16.52	24.1	7.58	0.87	1.82766	24.38	7.86	0.59	1.50525	1.79574
	17.37	24.33	6.96	1.49	2.80889	24.93	7.56	0.89	1.85318	1.7474			16.54	24.23	7.69	0.76	1.69349	24.37	7.83	0.62	1.53688	1.49535
	17.21	24.18	6.97	1.48	2.78949	24.95	7.74	0.71	1.6358	0.392548			16.49	24.04	7.55	0.9	1.86607	24.41	7.92	0.53	1.44393	0.167279
	GAPDH	CDS primer	∆Ct	-∆∆Ct	2-∆∆Ct	AS primer	∆Ct	-∆∆Ct	2-∆∆Ct	PSI			GAPDH	CDS primer	∆Ct	-∆∆Ct	2-∆∆Ct	AS primer	∆Ct	-∆∆Ct	2-∆∆Ct	PSI
20	17.98	23.69	5.71	2.74	6.6807	24.13	6.15	2.3	4.92458	6.71696		20	16.26	23.57	7.31	1.14	2.20381	23.85	7.59	0.86	1.81504	2.19874
	18	23.77	5.77	2.68	6.40856	24.11	6.11	2.34	5.06303	4.98214			16.32	23.64	7.32	1.13	2.18859	23.87	7.55	0.9	1.86607	1.8074
	17.94	23.57	5.63	2.82	7.06162	24.08	6.14	2.31	4.95883	0.258274			16.24	23.55	7.31	1.14	2.20381	23.89	7.65	0.8	1.7411	0.177981
ES〇HPCAL1〇ID〇052659
DEAS												CDS
Primer pair 1												Primer pair 1
	Sequence (5'->3')	Template strand	Length	Start	Stop	Tm	GC%	Self complementarity	Self 3' complementarity				Sequence (5'->3')	Template strand	Length	Start	Stop	Tm	GC%	Self complementarity	Self 3' complementarity
Forward primer	GGCTGTTCCAGCTCCAAAGA	Plus	20	5	24	60.25	55	5	2			Forward primer	AAACAGAACAGCAAGCTGCG	Plus	20	7	26	59.97	50	6	2
Reverse primer	GTGAGTCCCACACGGTTCTC	Minus	20	171	152	60.32	60	5	2			Reverse primer	TTGAACTCGTCCACGGTCAG	Minus	20	146	127	59.97	55	4	2
Product length	167											Product length	140

## Sheet: MALE_LUSC
Tumor												Normal
Num		CDS primer				AS primer				PSI		Num		CDS primer				AS primer				PSI
Number	GAPDH	CDS primer	∆Ct	-∆∆Ct	2-∆∆Ct	AS primer	∆Ct	-∆∆Ct	2-∆∆Ct	PSI		Number	GAPDH	CDS primer	∆Ct	-∆∆Ct	2-∆∆Ct	AS primer	∆Ct	-∆∆Ct	2-∆∆Ct	PSI
1	16.8	24.24	7.44	0	1	24.32	7.52	-0.08	0.946058	1.0004		1	17.8	24.25	6.45	0.99	1.98618	24.39	6.59	0.85	1.8025	2.04821
	16.92	24.31	7.39	0.05	1.03526	24.34	7.42	0.02	1.01396	0.935587			17.94	24.27	6.33	1.11	2.15846	24.38	6.44	1	2	1.87251
	16.7	24.19	7.49	-0.05	0.965936	24.38	7.68	-0.24	0.846745	0.935213			17.77	24.21	6.44	1	2	24.35	6.58	0.86	1.81504	0.914218
	GAPDH	CDS primer	∆Ct	-∆∆Ct	2-∆∆Ct	AS primer	∆Ct	-∆∆Ct	2-∆∆Ct	PSI			GAPDH	CDS primer	∆Ct	-∆∆Ct	2-∆∆Ct	AS primer	∆Ct	-∆∆Ct	2-∆∆Ct	PSI
2	16.03	25.74	9.71	-2.27	0.20733	25.79	9.76	-2.32	0.200267	0.202881		2	18.16	24.24	6.08	1.36	2.56685	24.39	6.23	1.21	2.31338	2.53771
	16.03	25.88	9.85	-2.41	0.188156	25.91	9.88	-2.44	0.184284	0.197774			18.23	24.31	6.08	1.36	2.56685	24.39	6.16	1.28	2.42839	2.31519
	15.96	25.63	9.67	-2.23	0.213159	25.66	9.7	-2.26	0.208772	0.974827			18.08	24.21	6.13	1.31	2.47942	24.38	6.3	1.14	2.20381	0.912317
	GAPDH	CDS primer	∆Ct	-∆∆Ct	2-∆∆Ct	AS primer	∆Ct	-∆∆Ct	2-∆∆Ct	PSI			GAPDH	CDS primer	∆Ct	-∆∆Ct	2-∆∆Ct	AS primer	∆Ct	-∆∆Ct	2-∆∆Ct	PSI
3	17.3	25	7.7	-0.26	0.835088	25.11	7.81	-0.37	0.773782	0.843076		3	16.15	25.1	8.95	-1.51	0.351111	25.21	9.06	-1.62	0.325335	0.343143
	17.44	25.08	7.64	-0.2	0.870551	25.09	7.65	-0.21	0.864537	0.776958			16.18	25.19	9.01	-1.57	0.336808	25.17	8.99	-1.55	0.34151	0.328495
	17.16	24.88	7.72	-0.28	0.823591	25.13	7.97	-0.53	0.692555	0.921575			16.09	25.08	8.99	-1.55	0.34151	25.18	9.09	-1.65	0.31864	0.957312
	GAPDH	CDS primer	∆Ct	-∆∆Ct	2-∆∆Ct	AS primer	∆Ct	-∆∆Ct	2-∆∆Ct	PSI			GAPDH	CDS primer	∆Ct	-∆∆Ct	2-∆∆Ct	AS primer	∆Ct	-∆∆Ct	2-∆∆Ct	PSI
4	18.05	25.68	7.63	-0.19	0.876606	25.71	7.66	-0.22	0.858565	0.864579		4	16.97	24.43	7.46	-0.02	0.986233	24.52	7.55	-0.11	0.926588	1.00287
	18.15	25.81	7.66	-0.22	0.858565	25.79	7.64	-0.2	0.870551	0.85862			16.99	24.47	7.48	-0.04	0.972655	24.55	7.56	-0.12	0.920188	0.926603
	18.01	25.67	7.66	-0.22	0.858565	25.69	7.68	-0.24	0.846745	0.993108			16.97	24.34	7.37	0.07	1.04972	24.51	7.54	-0.1	0.933033	0.923953
	GAPDH	CDS primer	∆Ct	-∆∆Ct	2-∆∆Ct	AS primer	∆Ct	-∆∆Ct	2-∆∆Ct	PSI			GAPDH	CDS primer	∆Ct	-∆∆Ct	2-∆∆Ct	AS primer	∆Ct	-∆∆Ct	2-∆∆Ct	PSI
5	16.96	24.34	7.38	0.06	1.04247	24.41	7.45	-0.01	0.993092	1.03528		5	17.63	25.52	7.89	-0.45	0.732043	25.61	7.98	-0.54	0.687771	0.728043
	17.04	24.44	7.4	0.04	1.02811	24.45	7.41	0.03	1.02101	0.995587			17.73	25.54	7.81	-0.37	0.773782	25.63	7.9	-0.46	0.726986	0.68549
	16.91	24.3	7.39	0.05	1.03526	24.39	7.48	-0.04	0.972655	0.961658			17.51	25.51	8	-0.56	0.678302	25.59	8.08	-0.64	0.641713	0.941552
	GAPDH	CDS primer	∆Ct	-∆∆Ct	2-∆∆Ct	AS primer	∆Ct	-∆∆Ct	2-∆∆Ct	PSI			GAPDH	CDS primer	∆Ct	-∆∆Ct	2-∆∆Ct	AS primer	∆Ct	-∆∆Ct	2-∆∆Ct	PSI
6	17.45	24.93	7.48	-0.04	0.972655	24.99	7.54	-0.1	0.933033	0.99578		6	17.69	25.1	7.41	0.03	1.02101	25.21	7.52	-0.08	0.946058	1.03783
	17.52	24.99	7.47	-0.03	0.97942	24.96	7.44	0	1	0.966323			17.78	25.13	7.35	0.09	1.06437	25.18	7.4	0.04	1.02811	0.975603
	17.43	24.82	7.39	0.05	1.03526	24.92	7.49	-0.05	0.965936	0.970418			17.68	25.08	7.4	0.04	1.02811	25.19	7.51	-0.07	0.952638	0.94004
	GAPDH	CDS primer	∆Ct	-∆∆Ct	2-∆∆Ct	AS primer	∆Ct	-∆∆Ct	2-∆∆Ct	PSI			GAPDH	CDS primer	∆Ct	-∆∆Ct	2-∆∆Ct	AS primer	∆Ct	-∆∆Ct	2-∆∆Ct	PSI
7	16.55	25.15	8.6	-1.16	0.447513	25.25	8.7	-1.26	0.417544	0.458063		7	17.89	25.54	7.65	-0.21	0.864537	25.68	7.79	-0.35	0.784584	0.870592
	16.69	25.22	8.53	-1.09	0.469761	25.27	8.58	-1.14	0.45376	0.426752			18.01	25.66	7.65	-0.21	0.864537	25.67	7.66	-0.22	0.858565	0.803862
	16.53	25.1	8.57	-1.13	0.456916	25.26	8.73	-1.29	0.408951	0.931643			17.87	25.49	7.62	-0.18	0.882703	25.69	7.82	-0.38	0.768438	0.923351
	GAPDH	CDS primer	∆Ct	-∆∆Ct	2-∆∆Ct	AS primer	∆Ct	-∆∆Ct	2-∆∆Ct	PSI			GAPDH	CDS primer	∆Ct	-∆∆Ct	2-∆∆Ct	AS primer	∆Ct	-∆∆Ct	2-∆∆Ct	PSI
8	16.18	25.55	9.37	-1.93	0.262429	25.61	9.43	-1.99	0.251739	0.260021		8	16.27	24.44	8.17	-0.73	0.602904	24.5	8.23	-0.79	0.578344	0.61594
	16.27	25.66	9.39	-1.95	0.258816	25.65	9.38	-1.94	0.260616	0.249079			16.39	24.46	8.07	-0.63	0.646176	24.51	8.12	-0.68	0.624165	0.588346
	16.09	25.48	9.39	-1.95	0.258816	25.62	9.53	-2.09	0.234881	0.957919			16.23	24.41	8.18	-0.74	0.598739	24.5	8.27	-0.83	0.562529	0.955201
	GAPDH	CDS primer	∆Ct	-∆∆Ct	2-∆∆Ct	AS primer	∆Ct	-∆∆Ct	2-∆∆Ct	PSI			GAPDH	CDS primer	∆Ct	-∆∆Ct	2-∆∆Ct	AS primer	∆Ct	-∆∆Ct	2-∆∆Ct	PSI
9	16.95	25.55	8.6	-1.16	0.447513	25.61	8.66	-1.22	0.429283	0.456018		9	16.28	25.28	9	-1.56	0.339151	25.37	9.09	-1.65	0.31864	0.343952
	16.96	25.56	8.6	-1.16	0.447513	25.59	8.63	-1.19	0.438303	0.435296			16.34	25.28	8.94	-1.5	0.353553	25.39	9.05	-1.61	0.327598	0.3173
	16.94	25.46	8.52	-1.08	0.473029	25.57	8.63	-1.19	0.438303	0.954559			16.22	25.22	9	-1.56	0.339151	25.37	9.15	-1.71	0.30566	0.922511
	GAPDH	CDS primer	∆Ct	-∆∆Ct	2-∆∆Ct	AS primer	∆Ct	-∆∆Ct	2-∆∆Ct	PSI			GAPDH	CDS primer	∆Ct	-∆∆Ct	2-∆∆Ct	AS primer	∆Ct	-∆∆Ct	2-∆∆Ct	PSI
10	17.39	24.76	7.37	0.07	1.04972	24.83	7.44	0	1	1.04733		10	16.08	25.32	9.24	-1.8	0.287175	25.5	9.42	-1.98	0.25349	0.280068
	17.52	24.88	7.36	0.08	1.05702	24.86	7.34	0.1	1.07177	0.986872			16.16	25.42	9.26	-1.82	0.283221	25.46	9.3	-1.86	0.275476	0.256261
	17.27	24.66	7.39	0.05	1.03526	24.88	7.61	-0.17	0.888843	0.942271			15.97	25.3	9.33	-1.89	0.269807	25.47	9.5	-2.06	0.239816	0.914996
RI〇CCDC88A〇ID〇053613
DEAS												CDS
Primer pair 1												Primer pair 1
	Sequence (5'->3')	Template strand	Length	Start	Stop	Tm	GC%	Self complementarity	Self 3' complementarity				Sequence (5'->3')	Template strand	Length	Start	Stop	Tm	GC%	Self complementarity	Self 3' complementarity
Forward primer	ACCCCAGGGGACTTCTATGAT	Plus	21	17	37	59.7	52.38	7	3			Forward primer	GGAACTCGTGCTCGTTCTGA	Plus	20	1105	1124	60.04	55	4	3
Reverse primer	TGGTGTAGGTTTTCCCGCAG	Minus	20	127	108	60.25	55	2	2			Reverse primer	GATTTCTGGGGTGCTTCGGA	Minus	20	1346	1327	60.04	55	3	3
Product length	111											Product length	242
Primer pair 2												Primer pair 2
	Sequence (5'->3')	Template strand	Length	Start	Stop	Tm	GC%	Self complementarity	Self 3' complementarity				Sequence (5'->3')	Template strand	Length	Start	Stop	Tm	GC%	Self complementarity	Self 3' complementarity
Forward primer	GGGAAAACCTACACCAGGCA	Plus	20	112	131	59.89	55	3	0			Forward primer	ATTTGCTTTCGGATGCTCGC	Plus	20	890	909	59.9	50	4	2
Reverse primer	GCTTGCACGAGGTAAAGTTGC	Minus	21	220	200	60.66	52.38	4	2			Reverse primer	TCAGAACGAGCACGAGTTCC	Minus	20	1124	1105	60.04	55	4	2
Product length	109											Product length	235

## Sheet: FEMALE_LUSC 
Tumor												Normal
Num		CDS primer				AS primer				PSI		Num		CDS primer				AS primer				PSI
Number	GAPDH	CDS primer	∆Ct	-∆∆Ct	2-∆∆Ct	AS primer	∆Ct	-∆∆Ct	2-∆∆Ct	PSI		Number	GAPDH	CDS primer	∆Ct	-∆∆Ct	2-∆∆Ct	AS primer	∆Ct	-∆∆Ct	2-∆∆Ct	PSI
1	17.83	24.35	6.52	0.01	1.00696	24.66	6.83	-0.3	0.812252	1.00034		1	17.16	24.15	6.99	-0.46	0.726986	24.38	7.22	-0.69	0.619854	0.730404
	17.84	24.42	6.58	-0.05	0.965936	24.65	6.81	-0.28	0.823591	0.816032			17.25	24.25	7	-0.47	0.721965	24.42	7.17	-0.64	0.641713	0.613304
	17.81	24.3	6.49	0.04	1.02811	24.64	6.83	-0.3	0.812252	0.815758			17.07	24.03	6.96	-0.43	0.742262	24.39	7.32	-0.79	0.578344	0.839677
	GAPDH	CDS primer	∆Ct	-∆∆Ct	2-∆∆Ct	AS primer	∆Ct	-∆∆Ct	2-∆∆Ct	PSI			GAPDH	CDS primer	∆Ct	-∆∆Ct	2-∆∆Ct	AS primer	∆Ct	-∆∆Ct	2-∆∆Ct	PSI
2	17.42	24.74	7.32	-0.79	0.578344	24.97	7.55	-1.02	0.493116	0.569611		2	17.87	24.31	6.44	0.09	1.06437	24.86	6.99	-0.46	0.726986	1.06008
	17.42	24.85	7.43	-0.9	0.535887	24.91	7.49	-0.96	0.514057	0.50124			17.99	24.38	6.39	0.14	1.10191	25	7.01	-0.48	0.716978	0.70586
	17.37	24.65	7.28	-0.75	0.594604	24.91	7.54	-1.01	0.496546	0.879968			17.73	24.24	6.51	0.02	1.01396	24.83	7.1	-0.57	0.673617	0.665857
	GAPDH	CDS primer	∆Ct	-∆∆Ct	2-∆∆Ct	AS primer	∆Ct	-∆∆Ct	2-∆∆Ct	PSI			GAPDH	CDS primer	∆Ct	-∆∆Ct	2-∆∆Ct	AS primer	∆Ct	-∆∆Ct	2-∆∆Ct	PSI
3	17.64	24.24	6.6	-0.07	0.952638	24.38	6.74	-0.21	0.864537	0.920469		3	16.95	24.85	7.9	-1.37	0.386891	24.97	8.02	-1.49	0.356013	0.397844
	17.71	24.38	6.67	-0.14	0.907519	24.31	6.6	-0.07	0.952638	0.886024			17.09	24.93	7.84	-1.31	0.403321	24.99	7.9	-1.37	0.386891	0.365486
	17.54	24.22	6.68	-0.15	0.90125	24.32	6.78	-0.25	0.840896	0.962579			16.93	24.77	7.84	-1.31	0.403321	24.96	8.03	-1.5	0.353553	0.918665
	GAPDH	CDS primer	∆Ct	-∆∆Ct	2-∆∆Ct	AS primer	∆Ct	-∆∆Ct	2-∆∆Ct	PSI			GAPDH	CDS primer	∆Ct	-∆∆Ct	2-∆∆Ct	AS primer	∆Ct	-∆∆Ct	2-∆∆Ct	PSI
4	16.95	24.58	7.63	-1.1	0.466516	24.61	7.66	-1.13	0.456916	0.469769		4	17.42	24.34	6.92	-0.39	0.76313	24.61	7.19	-0.66	0.632878	0.788436
	17	24.62	7.62	-1.09	0.469761	24.57	7.57	-1.04	0.486327	0.462555			17.51	24.35	6.84	-0.31	0.806642	24.62	7.11	-0.58	0.668964	0.636313
	16.85	24.46	7.61	-1.08	0.473029	24.55	7.7	-1.17	0.444421	0.984643			17.4	24.26	6.86	-0.33	0.795536	24.65	7.25	-0.72	0.607097	0.807058
	GAPDH	CDS primer	∆Ct	-∆∆Ct	2-∆∆Ct	AS primer	∆Ct	-∆∆Ct	2-∆∆Ct	PSI			GAPDH	CDS primer	∆Ct	-∆∆Ct	2-∆∆Ct	AS primer	∆Ct	-∆∆Ct	2-∆∆Ct	PSI
5	16.76	25.22	8.46	-1.93	0.262429	25.35	8.59	-2.06	0.239816	0.263798		5	17.75	24.92	7.17	-0.64	0.641713	25.37	7.62	-1.09	0.469761	0.658468
	16.76	25.27	8.51	-1.98	0.25349	25.38	8.62	-2.09	0.234881	0.23707			17.88	24.96	7.08	-0.55	0.68302	25.41	7.53	-1	0.5	0.477685
	16.75	25.14	8.39	-1.86	0.275476	25.36	8.61	-2.08	0.236514	0.89868			17.73	24.88	7.15	-0.62	0.650671	25.37	7.64	-1.11	0.463294	0.725449
	GAPDH	CDS primer	∆Ct	-∆∆Ct	2-∆∆Ct	AS primer	∆Ct	-∆∆Ct	2-∆∆Ct	PSI			GAPDH	CDS primer	∆Ct	-∆∆Ct	2-∆∆Ct	AS primer	∆Ct	-∆∆Ct	2-∆∆Ct	PSI
6	17.29	24.14	6.85	-0.32	0.80107	24.28	6.99	-0.46	0.726986	0.812344		6	17.21	24.87	7.66	-1.13	0.456916	25.08	7.87	-1.34	0.395021	0.463795
	17.4	24.2	6.8	-0.27	0.82932	24.16	6.76	-0.23	0.852635	0.777415			17.35	24.9	7.55	-1.02	0.493116	25.06	7.71	-1.18	0.441351	0.402501
	17.27	24.11	6.84	-0.31	0.806642	24.21	6.94	-0.41	0.752623	0.957002			17.13	24.84	7.71	-1.18	0.441351	25.09	7.96	-1.43	0.371131	0.867843
	GAPDH	CDS primer	∆Ct	-∆∆Ct	2-∆∆Ct	AS primer	∆Ct	-∆∆Ct	2-∆∆Ct	PSI			GAPDH	CDS primer	∆Ct	-∆∆Ct	2-∆∆Ct	AS primer	∆Ct	-∆∆Ct	2-∆∆Ct	PSI
7	16.28	25	8.72	-2.19	0.219151	25.03	8.75	-2.22	0.214641	0.218668		7	17.6	25.22	7.62	-1.09	0.469761	25.56	7.96	-1.43	0.371131	0.467606
	16.39	25.09	8.7	-2.17	0.222211	25.04	8.65	-2.12	0.230047	0.213611			17.64	25.28	7.64	-1.11	0.463294	25.59	7.95	-1.42	0.373712	0.369445
	16.2	24.95	8.75	-2.22	0.214641	25.08	8.88	-2.35	0.196146	0.976876			17.53	25.15	7.62	-1.09	0.469761	25.52	7.99	-1.46	0.363493	0.790079
	GAPDH	CDS primer	∆Ct	-∆∆Ct	2-∆∆Ct	AS primer	∆Ct	-∆∆Ct	2-∆∆Ct	PSI			GAPDH	CDS primer	∆Ct	-∆∆Ct	2-∆∆Ct	AS primer	∆Ct	-∆∆Ct	2-∆∆Ct	PSI
8	16.02	25.21	9.19	-2.66	0.15822	25.26	9.24	-2.71	0.15283	0.155118		8	16.48	24.74	8.26	-1.73	0.301452	25.19	8.71	-2.18	0.220676	0.297548
	16.03	25.34	9.31	-2.78	0.145592	25.29	9.26	-2.73	0.150726	0.148717			16.57	24.79	8.22	-1.69	0.309927	25.16	8.59	-2.06	0.239816	0.22213
	15.93	25.09	9.16	-2.63	0.161544	25.27	9.34	-2.81	0.142595	0.958733			16.35	24.71	8.36	-1.83	0.281265	25.16	8.81	-2.28	0.205898	0.746535
	GAPDH	CDS primer	∆Ct	-∆∆Ct	2-∆∆Ct	AS primer	∆Ct	-∆∆Ct	2-∆∆Ct	PSI			GAPDH	CDS primer	∆Ct	-∆∆Ct	2-∆∆Ct	AS primer	∆Ct	-∆∆Ct	2-∆∆Ct	PSI
9	16.94	24.84	7.9	-1.37	0.386891	25.03	8.09	-1.56	0.339151	0.395078		9	16.21	24.65	8.44	-1.91	0.266093	24.78	8.57	-2.04	0.243164	0.269977
	17.05	24.92	7.87	-1.34	0.395021	25.05	8	-1.47	0.360982	0.339591			16.34	24.69	8.35	-1.82	0.283221	24.76	8.42	-1.89	0.269807	0.252609
	16.9	24.74	7.84	-1.31	0.403321	25.08	8.18	-1.65	0.31864	0.859556			16.16	24.63	8.47	-1.94	0.260616	24.72	8.56	-2.03	0.244855	0.935668
	GAPDH	CDS primer	∆Ct	-∆∆Ct	2-∆∆Ct	AS primer	∆Ct	-∆∆Ct	2-∆∆Ct	PSI			GAPDH	CDS primer	∆Ct	-∆∆Ct	2-∆∆Ct	AS primer	∆Ct	-∆∆Ct	2-∆∆Ct	PSI
10	16.09	24.24	8.15	-1.62	0.325335	24.23	8.14	-1.61	0.327598	0.33383		10	17.12	24.93	7.81	-1.28	0.411796	25.01	7.89	-1.36	0.389582	0.404288
	16.18	24.24	8.06	-1.53	0.346277	24.25	8.07	-1.54	0.343885	0.327855			17.19	25.04	7.85	-1.32	0.400535	25.08	7.89	-1.36	0.389582	0.37595
	16.08	24.21	8.13	-1.6	0.329877	24.29	8.21	-1.68	0.312083	0.982103			17.04	24.89	7.85	-1.32	0.400535	25.09	8.05	-1.52	0.348686	0.929906
RI〇RPL29〇ID〇065167
DEAS												CDS
Primer pair 1												Primer pair 1
	Sequence (5'->3')	Template strand	Length	Start	Stop	Tm	GC%	Self complementarity	Self 3' complementarity				Sequence (5'->3')	Template strand	Length	Start	Stop	Tm	GC%	Self complementarity	Self 3' complementarity
Forward primer	TTGGTTCCAGGTGCACAGTC	Plus	20	35	54	60.47	55	6	1			Forward primer	CCTGAGGAACATGCGCTTTG	Plus	20	117	136	59.83	55	5	2
Reverse primer	AAGGAATTGCAGGCTTTGGG	Minus	20	137	118	59.02	50	4	0			Reverse primer	GGCTTTACGAGGGCCTTGAT	Minus	20	233	214	60.11	55	5	3
Product length	103											Product length	117
Primer pair 2												Primer pair 2
	Sequence (5'->3')	Template strand	Length	Start	Stop	Tm	GC%	Self complementarity	Self 3' complementarity				Sequence (5'->3')	Template strand	Length	Start	Stop	Tm	GC%	Self complementarity	Self 3' complementarity
Forward primer	GTCTTTTCTTGGTTCCAGGTGC	Plus	22	27	48	59.97	50	4	2			Forward primer	ACATGCGCTTTGCCAAGAAG	Plus	20	125	144	60.04	50	6	2
Reverse primer	TCAGGCAGAAGCCAAAGCTA	Minus	20	98	79	59.31	50	4	2			Reverse primer	CCCTTTGGGATCTTGGGCTT	Minus	20	263	244	59.96	55	4	0
Product length	72											Product length	139
